# Supplementary material
Source: publisher figshare collection journal article supplement (https://plos.figshare.com/articles/dataset/_/11411415)
Supplement: Supplementary file 1 [file 1]

Archive with 29 entries (29 files):
- pone.0226693.s001.tif
- pone.0226693.s002.tif
- pone.0226693.s003.tif
- pone.0226693.s004.tif
- pone.0226693.s005.tif
- pone.0226693.s006.tif
- pone.0226693.s007.docx
- pone.0226693.s008.docx
- pone.0226693.s009.docx
- pone.0226693.s010.docx
- pone.0226693.s011.docx
- pone.0226693.s012.pdb
- pone.0226693.s013.pdb
- pone.0226693.s014.pdb
- pone.0226693.s015.pdb
- pone.0226693.s016.pdb
- pone.0226693.s017.pdb
- pone.0226693.s018.pdb
- pone.0226693.s019.pdb
- pone.0226693.s020.pdb
- pone.0226693.s021.pdb
- pone.0226693.s022.pdb
- pone.0226693.s023.pdb
- pone.0226693.s024.pdf
- pone.0226693.s025.pdf
- pone.0226693.s026.pdf
- pone.0226693.s027.pdf
- pone.0226693.s028.pdf
- pone.0226693.s029.pdf
