# Supplementary material
Source: publisher figshare collection journal article supplement (https://plos.figshare.com/articles/dataset/_/11411415)
Supplement: Supplementary file 1 [file 1 › pone.0226693.s007.docx]

| **Domain** | **Residue range**  **(Q8WZ42)** | **Vector** | **Tags** | ***Escherichia coli* strain** |
| --- | --- | --- | --- | --- |
| **M1** | 32496-32590 | pET-M11 | N-6His-TEV | BL21 (DE3) CodonPlus-RIL |
| **M3** | 32712-32816 | pET-Z2-1a | N-6His-Z2-TEV | BL21 (DE3) CodonPlus-RIL |
| **M4** | 33293-33395 | pET-M14 | N-6His-3C | BL21 (DE3) |
| **M7** | 33773-33871 | pCDFM-14 | N-6His-3C | BL21 star (DE3) pRARE2 |
| **M10** | 34252–34350 | pET-M14 | N-6His-3C | BL21 star (DE3) pRARE2 |
