# Supplementary material
Source: publisher figshare collection journal article supplement (https://plos.figshare.com/articles/dataset/_/11411415)
Supplement: Supplementary file 1 [file 1 › pone.0226693.s008.docx]

| **M-domain (model)** | **M-domain (template)** | **PDB** | **Sequence  similarity** | **Sequence  coverage** | **Global Model Quality Estimation (GMQE)** |
| --- | --- | --- | --- | --- | --- |
| M2 | M7 | 3puc | 0.36 | 0.97 | 0.7 |
| M6 | M7 | 3puc | 0.34 | 0.94 | 0.66 |
| M8 | M4 | 3qp3 | 0.31 | 0.94 | 0.64 |
| M9 | M3 | 6hci | 0.37 | 0.99 | 0.75 |
