# Supplementary material
Source: publisher figshare collection journal article supplement (https://plos.figshare.com/articles/dataset/_/11411415)
Supplement: Supplementary file 1 [file 1 › pone.0226693.s010.docx]

| **Domain** | **Residue** | **Accessible surface area** | |
| --- | --- | --- | --- |
| **[Å2]** | **[%]** |
| M1 | C27 | 0.0 | 0.0 |
|  | C79 | 0.0 | 0.0 |
| M3 | C18 | 3.7 ± 0.6 | 8.0 |
|  | C25 | 23.5 ± 6.8 | 50.6 |
|  | C91 | 8.7 ± 1.7 | 18.7 |
| M4 | C20 | 37.7 ± 4.9 | 81.0 |
|  | C69 | 0.0 ± 0.0 | 0.0 |
|  | C81 | 0.0 ± 0.0 | 0.0 |
| M7 | C79 | 0.0 | 0.0 |
|  | C92 | 0.0 | 0.0 |
| M10 | C28 | 0.8 ± 1.1 | 1.7 |
|  | C42 | 37.0 ± 1.3 | 79.5 |
