# Supplementary material
Source: publisher figshare collection journal article supplement (https://plos.figshare.com/articles/dataset/_/11411415)
Supplement: Supplementary file 1 [file 1 › pone.0226693.s011.docx]

| **M-band domain** | **Free thiol content** |
| --- | --- |
| M3 | 2.82±0.03 |
| M4 | 1.17±0.09 |
| M7 | 0.17±0.00 |
| M10 | 1.08±0.08 |
