# Supplementary material
Source: publisher figshare collection journal article supplement (https://plos.figshare.com/articles/dataset/_/11411415)
Supplement: Supplementary file 1 [file 1 › pone.0226693.s012.pdb]

HEADER    IG DOMAIN                               11-FEB-05   2BK8              
TITLE     M1 DOMAIN FROM TITIN                                                  
COMPND    MOL_ID: 1;                                                            
COMPND   2 MOLECULE: TITIN HEART ISOFORM N2-B;                                  
COMPND   3 CHAIN: A;                                                            
COMPND   4 FRAGMENT: RESIDUES 25073-25166 (IG-LIKE DOMAIN);                     
COMPND   5 SYNONYM: CONNECTIN, M1;                                              
COMPND   6 EC: 2.7.1.-;                                                         
COMPND   7 ENGINEERED: YES                                                      
SOURCE    MOL_ID: 1;                                                            
SOURCE   2 ORGANISM_SCIENTIFIC: HOMO SAPIENS;                                   
SOURCE   3 ORGANISM_COMMON: HUMAN;                                              
SOURCE   4 ORGANISM_TAXID: 9606;                                                
SOURCE   5 TISSUE: MUSCLE;                                                      
SOURCE   6 EXPRESSION_SYSTEM: ESCHERICHIA COLI;                                 
SOURCE   7 EXPRESSION_SYSTEM_TAXID: 469008;                                     
SOURCE   8 EXPRESSION_SYSTEM_STRAIN: BL21(DE3);                                 
SOURCE   9 EXPRESSION_SYSTEM_VECTOR_TYPE: PLASMID;                              
SOURCE  10 EXPRESSION_SYSTEM_PLASMID: PETM11                                    
KEYWDS    IG DOMAIN, TITIN, M-BAND, STRUCTURAL PROTEIN, MUSCLE, ANTIBODY        
EXPDTA    X-RAY DIFFRACTION                                                     
AUTHOR    S.MUELLER,I.KURSULA,M.WILMANNS                                        
REVDAT   5   12-JUL-17 2BK8    1                                                
REVDAT   4   13-JUL-11 2BK8    1       VERSN                                    
REVDAT   3   24-FEB-09 2BK8    1       VERSN                                    
REVDAT   2   16-AUG-06 2BK8    1       DBREF                                    
REVDAT   1   09-AUG-06 2BK8    0                                                
JRNL        AUTH   S.MUELLER,I.KURSULA,M.WILMANNS                               
JRNL        TITL   STRUCTURE OF M1 DOMAIN FROM TITIN                            
JRNL        REF    TO BE PUBLISHED                                              
JRNL        REFN                                                                
REMARK   2                                                                      
REMARK   2 RESOLUTION.    1.69 ANGSTROMS.                                       
REMARK   3                                                                      
REMARK   3 REFINEMENT.                                                          
REMARK   3   PROGRAM     : REFMAC 5.2.0005                                      
REMARK   3   AUTHORS     : MURSHUDOV,VAGIN,DODSON                               
REMARK   3                                                                      
REMARK   3    REFINEMENT TARGET : MAXIMUM LIKELIHOOD                            
REMARK   3                                                                      
REMARK   3  DATA USED IN REFINEMENT.                                            
REMARK   3   RESOLUTION RANGE HIGH (ANGSTROMS) : 1.69                           
REMARK   3   RESOLUTION RANGE LOW  (ANGSTROMS) : 17.74                          
REMARK   3   DATA CUTOFF            (SIGMA(F)) : NULL                           
REMARK   3   COMPLETENESS FOR RANGE        (%) : 99.6                           
REMARK   3   NUMBER OF REFLECTIONS             : 11995                          
REMARK   3                                                                      
REMARK   3  FIT TO DATA USED IN REFINEMENT.                                     
REMARK   3   CROSS-VALIDATION METHOD          : THROUGHOUT                      
REMARK   3   FREE R VALUE TEST SET SELECTION  : RANDOM                          
REMARK   3   R VALUE     (WORKING + TEST SET) : 0.191                           
REMARK   3   R VALUE            (WORKING SET) : 0.189                           
REMARK   3   FREE R VALUE                     : 0.234                           
REMARK   3   FREE R VALUE TEST SET SIZE   (%) : 5.000                           
REMARK   3   FREE R VALUE TEST SET COUNT      : 632                             
REMARK   3                                                                      
REMARK   3  FIT IN THE HIGHEST RESOLUTION BIN.                                  
REMARK   3   TOTAL NUMBER OF BINS USED           : 20                           
REMARK   3   BIN RESOLUTION RANGE HIGH       (A) : 1.69                         
REMARK   3   BIN RESOLUTION RANGE LOW        (A) : 1.73                         
REMARK   3   REFLECTION IN BIN     (WORKING SET) : 871                          
REMARK   3   BIN COMPLETENESS (WORKING+TEST) (%) : NULL                         
REMARK   3   BIN R VALUE           (WORKING SET) : 0.2350                       
REMARK   3   BIN FREE R VALUE SET COUNT          : 46                           
REMARK   3   BIN FREE R VALUE                    : 0.2720                       
REMARK   3                                                                      
REMARK   3  NUMBER OF NON-HYDROGEN ATOMS USED IN REFINEMENT.                    
REMARK   3   PROTEIN ATOMS            : 776                                     
REMARK   3   NUCLEIC ACID ATOMS       : 0                                       
REMARK   3   HETEROGEN ATOMS          : 0                                       
REMARK   3   SOLVENT ATOMS            : 129                                     
REMARK   3                                                                      
REMARK   3  B VALUES.                                                           
REMARK   3   B VALUE TYPE : LIKELY RESIDUAL                                     
REMARK   3   FROM WILSON PLOT           (A**2) : NULL                           
REMARK   3   MEAN B VALUE      (OVERALL, A**2) : 37.37                          
REMARK   3   OVERALL ANISOTROPIC B VALUE.                                       
REMARK   3    B11 (A**2) : -1.83000                                             
REMARK   3    B22 (A**2) : -1.83000                                             
REMARK   3    B33 (A**2) : 3.67000                                              
REMARK   3    B12 (A**2) : 0.00000                                              
REMARK   3    B13 (A**2) : 0.00000                                              
REMARK   3    B23 (A**2) : 0.00000                                              
REMARK   3                                                                      
REMARK   3  ESTIMATED OVERALL COORDINATE ERROR.                                 
REMARK   3   ESU BASED ON R VALUE                            (A): 0.108         
REMARK   3   ESU BASED ON FREE R VALUE                       (A): 0.111         
REMARK   3   ESU BASED ON MAXIMUM LIKELIHOOD                 (A): 0.085         
REMARK   3   ESU FOR B VALUES BASED ON MAXIMUM LIKELIHOOD (A**2): NULL          
REMARK   3                                                                      
REMARK   3 CORRELATION COEFFICIENTS.                                            
REMARK   3   CORRELATION COEFFICIENT FO-FC      : 0.962                         
REMARK   3   CORRELATION COEFFICIENT FO-FC FREE : 0.939                         
REMARK   3                                                                      
REMARK   3  RMS DEVIATIONS FROM IDEAL VALUES        COUNT    RMS    WEIGHT      
REMARK   3   BOND LENGTHS REFINED ATOMS        (A):   803 ; 0.015 ; 0.022       
REMARK   3   BOND LENGTHS OTHERS               (A):  NULL ;  NULL ;  NULL       
REMARK   3   BOND ANGLES REFINED ATOMS   (DEGREES):  1081 ; 1.393 ; 1.948       
REMARK   3   BOND ANGLES OTHERS          (DEGREES):  NULL ;  NULL ;  NULL       
REMARK   3   TORSION ANGLES, PERIOD 1    (DEGREES):    96 ; 7.045 ; 5.000       
REMARK   3   TORSION ANGLES, PERIOD 2    (DEGREES):    41 ;37.227 ;25.122       
REMARK   3   TORSION ANGLES, PERIOD 3    (DEGREES):   148 ;15.057 ;15.000       
REMARK   3   TORSION ANGLES, PERIOD 4    (DEGREES):     3 ;24.415 ;15.000       
REMARK   3   CHIRAL-CENTER RESTRAINTS       (A**3):   115 ; 0.104 ; 0.200       
REMARK   3   GENERAL PLANES REFINED ATOMS      (A):   607 ; 0.007 ; 0.020       
REMARK   3   GENERAL PLANES OTHERS             (A):  NULL ;  NULL ;  NULL       
REMARK   3   NON-BONDED CONTACTS REFINED ATOMS (A):   305 ; 0.253 ; 0.200       
REMARK   3   NON-BONDED CONTACTS OTHERS        (A):  NULL ;  NULL ;  NULL       
REMARK   3   NON-BONDED TORSION REFINED ATOMS  (A):   513 ; 0.302 ; 0.200       
REMARK   3   NON-BONDED TORSION OTHERS         (A):  NULL ;  NULL ;  NULL       
REMARK   3   H-BOND (X...Y) REFINED ATOMS      (A):    69 ; 0.182 ; 0.200       
REMARK   3   H-BOND (X...Y) OTHERS             (A):  NULL ;  NULL ;  NULL       
REMARK   3   POTENTIAL METAL-ION REFINED ATOMS (A):  NULL ;  NULL ;  NULL       
REMARK   3   POTENTIAL METAL-ION OTHERS        (A):  NULL ;  NULL ;  NULL       
REMARK   3   SYMMETRY VDW REFINED ATOMS        (A):    20 ; 0.461 ; 0.200       
REMARK   3   SYMMETRY VDW OTHERS               (A):  NULL ;  NULL ;  NULL       
REMARK   3   SYMMETRY H-BOND REFINED ATOMS     (A):     6 ; 0.040 ; 0.200       
REMARK   3   SYMMETRY H-BOND OTHERS            (A):  NULL ;  NULL ;  NULL       
REMARK   3   SYMMETRY METAL-ION REFINED ATOMS  (A):  NULL ;  NULL ;  NULL       
REMARK   3   SYMMETRY METAL-ION OTHERS         (A):  NULL ;  NULL ;  NULL       
REMARK   3                                                                      
REMARK   3  ISOTROPIC THERMAL FACTOR RESTRAINTS.     COUNT   RMS    WEIGHT      
REMARK   3   MAIN-CHAIN BOND REFINED ATOMS  (A**2):   502 ; 1.884 ; 3.000       
REMARK   3   MAIN-CHAIN BOND OTHER ATOMS    (A**2):  NULL ;  NULL ;  NULL       
REMARK   3   MAIN-CHAIN ANGLE REFINED ATOMS (A**2):   770 ; 2.379 ; 4.000       
REMARK   3   MAIN-CHAIN ANGLE OTHER ATOMS   (A**2):  NULL ;  NULL ;  NULL       
REMARK   3   SIDE-CHAIN BOND REFINED ATOMS  (A**2):   364 ; 2.960 ; 4.000       
REMARK   3   SIDE-CHAIN BOND OTHER ATOMS    (A**2):  NULL ;  NULL ;  NULL       
REMARK   3   SIDE-CHAIN ANGLE REFINED ATOMS (A**2):   311 ; 3.393 ; 5.000       
REMARK   3   SIDE-CHAIN ANGLE OTHER ATOMS   (A**2):  NULL ;  NULL ;  NULL       
REMARK   3   LONG RANGE B REFINED ATOMS     (A**2):  NULL ;  NULL ;  NULL       
REMARK   3   LONG RANGE B OTHER ATOMS       (A**2):  NULL ;  NULL ;  NULL       
REMARK   3                                                                      
REMARK   3 ANISOTROPIC THERMAL FACTOR RESTRAINTS.    COUNT   RMS   WEIGHT       
REMARK   3   RIGID-BOND RESTRAINTS          (A**2):  NULL ;  NULL ;  NULL       
REMARK   3   SPHERICITY; FREE ATOMS         (A**2):  NULL ;  NULL ;  NULL       
REMARK   3   SPHERICITY; BONDED ATOMS       (A**2):  NULL ;  NULL ;  NULL       
REMARK   3                                                                      
REMARK   3  NCS RESTRAINTS STATISTICS                                           
REMARK   3   NUMBER OF DIFFERENT NCS GROUPS : NULL                              
REMARK   3                                                                      
REMARK   3  TLS DETAILS                                                         
REMARK   3   NUMBER OF TLS GROUPS  : 1                                          
REMARK   3                                                                      
REMARK   3   TLS GROUP : 1                                                      
REMARK   3    NUMBER OF COMPONENTS GROUP : 1                                    
REMARK   3    COMPONENTS        C SSSEQI   TO  C SSSEQI                         
REMARK   3    RESIDUE RANGE :   A     1        A    97                          
REMARK   3    ORIGIN FOR THE GROUP (A):  23.2947  -1.8454  34.8834              
REMARK   3    T TENSOR                                                          
REMARK   3      T11:  -0.1665 T22:  -0.1432                                     
REMARK   3      T33:  -0.1569 T12:  -0.0061                                     
REMARK   3      T13:  -0.0330 T23:  -0.0213                                     
REMARK   3    L TENSOR                                                          
REMARK   3      L11:   2.1986 L22:   3.4849                                     
REMARK   3      L33:   4.1068 L12:   0.4704                                     
REMARK   3      L13:  -0.8696 L23:  -1.7812                                     
REMARK   3    S TENSOR                                                          
REMARK   3      S11:  -0.0210 S12:   0.0812 S13:   0.0263                       
REMARK   3      S21:  -0.1107 S22:  -0.0135 S23:  -0.0098                       
REMARK   3      S31:  -0.0983 S32:   0.0011 S33:   0.0345                       
REMARK   3                                                                      
REMARK   3  BULK SOLVENT MODELLING.                                             
REMARK   3   METHOD USED : BABINET MODEL WITH MASK                              
REMARK   3   PARAMETERS FOR MASK CALCULATION                                    
REMARK   3   VDW PROBE RADIUS   : 1.20                                          
REMARK   3   ION PROBE RADIUS   : 0.80                                          
REMARK   3   SHRINKAGE RADIUS   : 0.80                                          
REMARK   3                                                                      
REMARK   3  OTHER REFINEMENT REMARKS: HYDROGENS HAVE BEEN ADDED IN THE RIDING   
REMARK   3  POSITIONS. ATOM RECORD CONTAINS RESIDUAL B FACTORS ONLY             
REMARK   4                                                                      
REMARK   4 2BK8 COMPLIES WITH FORMAT V. 3.30, 13-JUL-11                         
REMARK 100                                                                      
REMARK 100 THIS ENTRY HAS BEEN PROCESSED BY PDBE ON 11-FEB-05.                  
REMARK 100 THE DEPOSITION ID IS D_1290022938.                                   
REMARK 200                                                                      
REMARK 200 EXPERIMENTAL DETAILS                                                 
REMARK 200  EXPERIMENT TYPE                : X-RAY DIFFRACTION                  
REMARK 200  DATE OF DATA COLLECTION        : 16-NOV-04                          
REMARK 200  TEMPERATURE           (KELVIN) : 100.0                              
REMARK 200  PH                             : 7.00                               
REMARK 200  NUMBER OF CRYSTALS USED        : 1                                  
REMARK 200                                                                      
REMARK 200  SYNCHROTRON              (Y/N) : Y                                  
REMARK 200  RADIATION SOURCE               : EMBL/DESY, HAMBURG                 
REMARK 200  BEAMLINE                       : X11                                
REMARK 200  X-RAY GENERATOR MODEL          : NULL                               
REMARK 200  MONOCHROMATIC OR LAUE    (M/L) : M                                  
REMARK 200  WAVELENGTH OR RANGE        (A) : 0.8128                             
REMARK 200  MONOCHROMATOR                  : TRIANGULAR MONOCHROMATOR           
REMARK 200  OPTICS                         : MIRRORS                            
REMARK 200                                                                      
REMARK 200  DETECTOR TYPE                  : CCD                                
REMARK 200  DETECTOR MANUFACTURER          : MARRESEARCH                        
REMARK 200  INTENSITY-INTEGRATION SOFTWARE : XDS                                
REMARK 200  DATA SCALING SOFTWARE          : XSCALE                             
REMARK 200                                                                      
REMARK 200  NUMBER OF UNIQUE REFLECTIONS   : 24619                              
REMARK 200  RESOLUTION RANGE HIGH      (A) : 1.690                              
REMARK 200  RESOLUTION RANGE LOW       (A) : 17.740                             
REMARK 200  REJECTION CRITERIA  (SIGMA(I)) : -3.000                             
REMARK 200                                                                      
REMARK 200 OVERALL.                                                             
REMARK 200  COMPLETENESS FOR RANGE     (%) : 99.6                               
REMARK 200  DATA REDUNDANCY                : 3.800                              
REMARK 200  R MERGE                    (I) : 0.04000                            
REMARK 200  R SYM                      (I) : NULL                               
REMARK 200  <I/SIGMA(I)> FOR THE DATA SET  : 18.1000                            
REMARK 200                                                                      
REMARK 200 IN THE HIGHEST RESOLUTION SHELL.                                     
REMARK 200  HIGHEST RESOLUTION SHELL, RANGE HIGH (A) : 1.69                     
REMARK 200  HIGHEST RESOLUTION SHELL, RANGE LOW  (A) : 1.80                     
REMARK 200  COMPLETENESS FOR SHELL     (%) : 100.0                              
REMARK 200  DATA REDUNDANCY IN SHELL       : 3.80                               
REMARK 200  R MERGE FOR SHELL          (I) : 0.41000                            
REMARK 200  R SYM FOR SHELL            (I) : NULL                               
REMARK 200  <I/SIGMA(I)> FOR SHELL         : 3.890                              
REMARK 200                                                                      
REMARK 200 DIFFRACTION PROTOCOL: SINGLE WAVELENGTH                              
REMARK 200 METHOD USED TO DETERMINE THE STRUCTURE: MOLECULAR REPLACEMENT        
REMARK 200 SOFTWARE USED: AMORE, CASPR                                          
REMARK 200 STARTING MODEL: HOMOLOGY MODEL                                       
REMARK 200                                                                      
REMARK 200 REMARK: NULL                                                         
REMARK 280                                                                      
REMARK 280 CRYSTAL                                                              
REMARK 280 SOLVENT CONTENT, VS   (%): 44.00                                     
REMARK 280 MATTHEWS COEFFICIENT, VM (ANGSTROMS**3/DA): 2.21                     
REMARK 280                                                                      
REMARK 280 CRYSTALLIZATION CONDITIONS: 2.2 M AMMONIUM SULFATE 0.1 M BIS TRIS    
REMARK 280  PH 7.0, PH 7.00                                                     
REMARK 290                                                                      
REMARK 290 CRYSTALLOGRAPHIC SYMMETRY                                            
REMARK 290 SYMMETRY OPERATORS FOR SPACE GROUP: I 41                             
REMARK 290                                                                      
REMARK 290      SYMOP   SYMMETRY                                                
REMARK 290     NNNMMM   OPERATOR                                                
REMARK 290       1555   X,Y,Z                                                   
REMARK 290       2555   -X+1/2,-Y+1/2,Z+1/2                                     
REMARK 290       3555   -Y,X+1/2,Z+1/4                                          
REMARK 290       4555   Y+1/2,-X,Z+3/4                                          
REMARK 290       5555   X+1/2,Y+1/2,Z+1/2                                       
REMARK 290       6555   -X,-Y,Z                                                 
REMARK 290       7555   -Y+1/2,X,Z+3/4                                          
REMARK 290       8555   Y,-X+1/2,Z+1/4                                          
REMARK 290                                                                      
REMARK 290     WHERE NNN -> OPERATOR NUMBER                                     
REMARK 290           MMM -> TRANSLATION VECTOR                                  
REMARK 290                                                                      
REMARK 290 CRYSTALLOGRAPHIC SYMMETRY TRANSFORMATIONS                            
REMARK 290 THE FOLLOWING TRANSFORMATIONS OPERATE ON THE ATOM/HETATM             
REMARK 290 RECORDS IN THIS ENTRY TO PRODUCE CRYSTALLOGRAPHICALLY                
REMARK 290 RELATED MOLECULES.                                                   
REMARK 290   SMTRY1   1  1.000000  0.000000  0.000000        0.00000            
REMARK 290   SMTRY2   1  0.000000  1.000000  0.000000        0.00000            
REMARK 290   SMTRY3   1  0.000000  0.000000  1.000000        0.00000            
REMARK 290   SMTRY1   2 -1.000000  0.000000  0.000000       34.39000            
REMARK 290   SMTRY2   2  0.000000 -1.000000  0.000000       34.39000            
REMARK 290   SMTRY3   2  0.000000  0.000000  1.000000       24.09000            
REMARK 290   SMTRY1   3  0.000000 -1.000000  0.000000        0.00000            
REMARK 290   SMTRY2   3  1.000000  0.000000  0.000000       34.39000            
REMARK 290   SMTRY3   3  0.000000  0.000000  1.000000       12.04500            
REMARK 290   SMTRY1   4  0.000000  1.000000  0.000000       34.39000            
REMARK 290   SMTRY2   4 -1.000000  0.000000  0.000000        0.00000            
REMARK 290   SMTRY3   4  0.000000  0.000000  1.000000       36.13500            
REMARK 290   SMTRY1   5  1.000000  0.000000  0.000000       34.39000            
REMARK 290   SMTRY2   5  0.000000  1.000000  0.000000       34.39000            
REMARK 290   SMTRY3   5  0.000000  0.000000  1.000000       24.09000            
REMARK 290   SMTRY1   6 -1.000000  0.000000  0.000000        0.00000            
REMARK 290   SMTRY2   6  0.000000 -1.000000  0.000000        0.00000            
REMARK 290   SMTRY3   6  0.000000  0.000000  1.000000        0.00000            
REMARK 290   SMTRY1   7  0.000000 -1.000000  0.000000       34.39000            
REMARK 290   SMTRY2   7  1.000000  0.000000  0.000000        0.00000            
REMARK 290   SMTRY3   7  0.000000  0.000000  1.000000       36.13500            
REMARK 290   SMTRY1   8  0.000000  1.000000  0.000000        0.00000            
REMARK 290   SMTRY2   8 -1.000000  0.000000  0.000000       34.39000            
REMARK 290   SMTRY3   8  0.000000  0.000000  1.000000       12.04500            
REMARK 290                                                                      
REMARK 290 REMARK: NULL                                                         
REMARK 300                                                                      
REMARK 300 BIOMOLECULE: 1                                                       
REMARK 300 SEE REMARK 350 FOR THE AUTHOR PROVIDED AND/OR PROGRAM                
REMARK 300 GENERATED ASSEMBLY INFORMATION FOR THE STRUCTURE IN                  
REMARK 300 THIS ENTRY. THE REMARK MAY ALSO PROVIDE INFORMATION ON               
REMARK 300 BURIED SURFACE AREA.                                                 
REMARK 350                                                                      
REMARK 350 COORDINATES FOR A COMPLETE MULTIMER REPRESENTING THE KNOWN           
REMARK 350 BIOLOGICALLY SIGNIFICANT OLIGOMERIZATION STATE OF THE                
REMARK 350 MOLECULE CAN BE GENERATED BY APPLYING BIOMT TRANSFORMATIONS          
REMARK 350 GIVEN BELOW.  BOTH NON-CRYSTALLOGRAPHIC AND                          
REMARK 350 CRYSTALLOGRAPHIC OPERATIONS ARE GIVEN.                               
REMARK 350                                                                      
REMARK 350 BIOMOLECULE: 1                                                       
REMARK 350 AUTHOR DETERMINED BIOLOGICAL UNIT: MONOMERIC                         
REMARK 350 SOFTWARE DETERMINED QUATERNARY STRUCTURE: MONOMERIC                  
REMARK 350 SOFTWARE USED: PQS                                                   
REMARK 350 APPLY THE FOLLOWING TO CHAINS: A                                     
REMARK 350   BIOMT1   1  1.000000  0.000000  0.000000        0.00000            
REMARK 350   BIOMT2   1  0.000000  1.000000  0.000000        0.00000            
REMARK 350   BIOMT3   1  0.000000  0.000000  1.000000        0.00000            
REMARK 500                                                                      
REMARK 500 GEOMETRY AND STEREOCHEMISTRY                                         
REMARK 500 SUBTOPIC: CLOSE CONTACTS IN SAME ASYMMETRIC UNIT                     
REMARK 500                                                                      
REMARK 500 THE FOLLOWING ATOMS ARE IN CLOSE CONTACT.                            
REMARK 500                                                                      
REMARK 500  ATM1  RES C  SSEQI   ATM2  RES C  SSEQI           DISTANCE          
REMARK 500   CB   TYR A    60     NZ   LYS A    62              2.10            
REMARK 500                                                                      
REMARK 500 REMARK: NULL                                                         
REMARK 500                                                                      
REMARK 500 GEOMETRY AND STEREOCHEMISTRY                                         
REMARK 500 SUBTOPIC: TORSION ANGLES                                             
REMARK 500                                                                      
REMARK 500 TORSION ANGLES OUTSIDE THE EXPECTED RAMACHANDRAN REGIONS:            
REMARK 500 (M=MODEL NUMBER; RES=RESIDUE NAME; C=CHAIN IDENTIFIER;               
REMARK 500 SSEQ=SEQUENCE NUMBER; I=INSERTION CODE).                             
REMARK 500                                                                      
REMARK 500 STANDARD TABLE:                                                      
REMARK 500 FORMAT:(10X,I3,1X,A3,1X,A1,I4,A1,4X,F7.2,3X,F7.2)                    
REMARK 500                                                                      
REMARK 500 EXPECTED VALUES: GJ KLEYWEGT AND TA JONES (1996). PHI/PSI-           
REMARK 500 CHOLOGY: RAMACHANDRAN REVISITED. STRUCTURE 4, 1395 - 1400            
REMARK 500                                                                      
REMARK 500  M RES CSSEQI        PSI       PHI                                   
REMARK 500    ALA A   1     -171.75     74.93                                   
REMARK 500    VAL A  94      -70.10    -93.57                                   
REMARK 500                                                                      
REMARK 500 REMARK: NULL                                                         
REMARK 525                                                                      
REMARK 525 SOLVENT                                                              
REMARK 525                                                                      
REMARK 525 THE SOLVENT MOLECULES HAVE CHAIN IDENTIFIERS THAT                    
REMARK 525 INDICATE THE POLYMER CHAIN WITH WHICH THEY ARE MOST                  
REMARK 525 CLOSELY ASSOCIATED. THE REMARK LISTS ALL THE SOLVENT                 
REMARK 525 MOLECULES WHICH ARE MORE THAN 5A AWAY FROM THE                       
REMARK 525 NEAREST POLYMER CHAIN (M = MODEL NUMBER;                             
REMARK 525 RES=RESIDUE NAME; C=CHAIN IDENTIFIER; SSEQ=SEQUENCE                  
REMARK 525 NUMBER; I=INSERTION CODE):                                           
REMARK 525                                                                      
REMARK 525  M RES CSSEQI                                                        
REMARK 525    HOH A2023        DISTANCE =  6.62 ANGSTROMS                       
REMARK 900                                                                      
REMARK 900 RELATED ENTRIES                                                      
REMARK 900 RELATED ID: 1TNM   RELATED DB: PDB                                   
REMARK 900 TITIN MODULE M5 (CONNECTIN) (NMR, MINIMIZED AVERAGE STRUCTURE)       
REMARK 900 RELATED ID: 1TNN   RELATED DB: PDB                                   
REMARK 900 TITIN MODULE M5 (CONNECTIN) (NMR, 16 STRUCTURES)                     
DBREF  2BK8 A    0     2  PDB    2BK8     2BK8             0      2             
DBREF  2BK8 A    3    96  UNP    Q8WZ42   TITIN_HUMAN  32497  32590             
SEQRES   1 A   97  GLY ALA MET VAL SER GLY GLN ILE MET HIS ALA VAL GLY          
SEQRES   2 A   97  GLU GLU GLY GLY HIS VAL LYS TYR VAL CYS LYS ILE GLU          
SEQRES   3 A   97  ASN TYR ASP GLN SER THR GLN VAL THR TRP TYR PHE GLY          
SEQRES   4 A   97  VAL ARG GLN LEU GLU ASN SER GLU LYS TYR GLU ILE THR          
SEQRES   5 A   97  TYR GLU ASP GLY VAL ALA ILE LEU TYR VAL LYS ASP ILE          
SEQRES   6 A   97  THR LYS LEU ASP ASP GLY THR TYR ARG CYS LYS VAL VAL          
SEQRES   7 A   97  ASN ASP TYR GLY GLU ASP SER SER TYR ALA GLU LEU PHE          
SEQRES   8 A   97  VAL LYS GLY VAL ARG GLU                                      
FORMUL   2  HOH   *129(H2 O)                                                    
HELIX    1   1 THR A   65  ASP A   69  5                                   5    
SHEET    1  AA 4 VAL A   3  SER A   4  0                                        
SHEET    2  AA 4 VAL A  18  GLU A  25 -1  O  GLU A  25   N  VAL A   3           
SHEET    3  AA 4 VAL A  56  VAL A  61 -1  O  ALA A  57   N  CYS A  22           
SHEET    4  AA 4 TYR A  48  GLU A  53 -1  O  GLU A  49   N  TYR A  60           
SHEET    1  AB 5 ALA A  10  GLY A  12  0                                        
SHEET    2  AB 5 GLU A  82  VAL A  91  1  O  GLU A  88   N  ALA A  10           
SHEET    3  AB 5 GLY A  70  VAL A  77 -1  O  GLY A  70   N  LEU A  89           
SHEET    4  AB 5 GLN A  32  PHE A  37 -1  O  GLN A  32   N  VAL A  77           
SHEET    5  AB 5 ARG A  40  GLN A  41 -1  O  ARG A  40   N  PHE A  37           
CISPEP   1 GLY A    0    ALA A    1          0       -12.04                     
CISPEP   2 ALA A    1    MET A    2          0        15.83                     
CRYST1   68.780   68.780   48.180  90.00  90.00  90.00 I 41          8          
ORIGX1      1.000000  0.000000  0.000000        0.00000                         
ORIGX2      0.000000  1.000000  0.000000        0.00000                         
ORIGX3      0.000000  0.000000  1.000000        0.00000                         
SCALE1      0.014539  0.000000  0.000000        0.00000                         
SCALE2      0.000000  0.014539  0.000000        0.00000                         
SCALE3      0.000000  0.000000  0.020755        0.00000                         
ATOM      1  N   GLY A   0      23.208   3.998  14.087  1.00 38.51           N  
ATOM      2  CA  GLY A   0      23.888   2.682  13.886  1.00 39.30           C  
ATOM      3  C   GLY A   0      22.989   1.662  13.212  1.00 40.09           C  
ATOM      4  O   GLY A   0      23.039   1.538  11.993  1.00 41.54           O  
ATOM      5  N   ALA A   1      22.195   0.896  13.971  1.00 40.08           N  
ATOM      6  CA  ALA A   1      22.284   0.768  15.448  1.00 39.46           C  
ATOM      7  C   ALA A   1      21.734   1.995  16.254  1.00 38.68           C  
ATOM      8  O   ALA A   1      21.126   2.870  15.643  1.00 43.94           O  
ATOM      9  CB  ALA A   1      23.676   0.322  15.845  1.00 38.77           C  
ATOM     10  N   MET A   2      21.880   2.121  17.578  1.00 37.96           N  
ATOM     11  CA  MET A   2      22.780   1.402  18.453  1.00 33.88           C  
ATOM     12  C   MET A   2      22.438  -0.075  18.679  1.00 33.27           C  
ATOM     13  O   MET A   2      21.343  -0.552  18.348  1.00 34.37           O  
ATOM     14  CB  MET A   2      22.919   2.144  19.808  1.00 33.15           C  
ATOM     15  CG AMET A   2      22.647   3.658  19.789  0.50 24.93           C  
ATOM     16  CG BMET A   2      22.156   1.535  21.050  0.50 18.28           C  
ATOM     17  SD AMET A   2      22.714   4.247  21.486  0.50 30.31           S  
ATOM     18  SD BMET A   2      20.651   2.469  21.375  0.50 34.37           S  
ATOM     19  CE AMET A   2      21.292   5.259  21.640  0.50 27.23           C  
ATOM     20  CE BMET A   2      21.350   4.111  21.545  0.50 18.23           C  
ATOM     21  N   VAL A   3      23.439  -0.790  19.161  1.00 33.89           N  
ATOM     22  CA  VAL A   3      23.258  -2.092  19.798  1.00 33.21           C  
ATOM     23  C   VAL A   3      23.912  -2.015  21.164  1.00 33.22           C  
ATOM     24  O   VAL A   3      25.060  -1.566  21.297  1.00 33.60           O  
ATOM     25  CB  VAL A   3      23.922  -3.211  18.990  1.00 31.98           C  
ATOM     26  CG1 VAL A   3      23.892  -4.544  19.707  1.00 33.08           C  
ATOM     27  CG2 VAL A   3      23.240  -3.363  17.644  1.00 27.05           C  
ATOM     28  N   SER A   4      23.179  -2.425  22.193  1.00 33.23           N  
ATOM     29  CA  SER A   4      23.777  -2.572  23.501  1.00 33.74           C  
ATOM     30  C   SER A   4      24.379  -3.972  23.677  1.00 32.71           C  
ATOM     31  O   SER A   4      23.707  -4.989  23.436  1.00 32.12           O  
ATOM     32  CB  SER A   4      22.741  -2.244  24.581  1.00 33.00           C  
ATOM     33  OG  SER A   4      21.665  -3.170  24.550  1.00 37.18           O  
ATOM     34  N   GLY A   5      25.656  -4.028  24.089  1.00 32.63           N  
ATOM     35  CA  GLY A   5      26.397  -5.309  24.240  1.00 32.40           C  
ATOM     36  C   GLY A   5      25.975  -6.208  25.408  1.00 35.47           C  
ATOM     37  O   GLY A   5      25.180  -5.798  26.258  1.00 35.95           O  
ATOM     38  N   GLN A   6      26.495  -7.443  25.451  1.00 34.80           N  
ATOM     39  CA  GLN A   6      26.158  -8.368  26.551  1.00 36.54           C  
ATOM     40  C   GLN A   6      26.795  -7.901  27.859  1.00 35.98           C  
ATOM     41  O   GLN A   6      27.922  -7.398  27.874  1.00 34.73           O  
ATOM     42  CB  GLN A   6      26.635  -9.805  26.268  1.00 36.02           C  
ATOM     43  CG  GLN A   6      26.183 -10.390  24.942  1.00 39.87           C  
ATOM     44  CD  GLN A   6      27.032 -11.569  24.531  1.00 41.76           C  
ATOM     45  OE1 GLN A   6      28.224 -11.425  24.251  1.00 47.59           O  
ATOM     46  NE2 GLN A   6      26.427 -12.738  24.479  1.00 43.38           N  
ATOM     47  N   ILE A   7      26.070  -8.120  28.954  1.00 33.86           N  
ATOM     48  CA  ILE A   7      26.500  -7.824  30.318  1.00 36.27           C  
ATOM     49  C   ILE A   7      26.578  -9.175  31.063  1.00 35.20           C  
ATOM     50  O   ILE A   7      25.676 -10.022  30.929  1.00 35.12           O  
ATOM     51  CB  ILE A   7      25.506  -6.891  31.023  1.00 34.36           C  
ATOM     52  CG1 ILE A   7      25.323  -5.553  30.285  1.00 34.75           C  
ATOM     53  CG2 ILE A   7      25.917  -6.620  32.491  1.00 35.39           C  
ATOM     54  CD1 ILE A   7      24.120  -4.721  30.832  1.00 35.04           C  
ATOM     55  N   MET A   8      27.664  -9.388  31.816  1.00 36.21           N  
ATOM     56  CA  MET A   8      27.850 -10.641  32.587  1.00 33.32           C  
ATOM     57  C   MET A   8      27.174 -10.648  33.977  1.00 34.52           C  
ATOM     58  O   MET A   8      27.046  -9.593  34.638  1.00 35.33           O  
ATOM     59  CB  MET A   8      29.338 -10.936  32.776  1.00 32.58           C  
ATOM     60  CG  MET A   8      30.190 -10.863  31.531  1.00 33.83           C  
ATOM     61  SD  MET A   8      29.603 -11.941  30.196  1.00 35.28           S  
ATOM     62  CE  MET A   8      29.986 -13.591  30.783  1.00 33.82           C  
ATOM     63  N   HIS A   9      26.752 -11.833  34.426  1.00 32.59           N  
ATOM     64  CA  HIS A   9      26.148 -11.982  35.765  1.00 34.38           C  
ATOM     65  C   HIS A   9      27.245 -11.747  36.808  1.00 36.61           C  
ATOM     66  O   HIS A   9      28.440 -11.826  36.460  1.00 36.67           O  
ATOM     67  CB  HIS A   9      25.530 -13.390  35.961  1.00 33.65           C  
ATOM     68  CG  HIS A   9      24.507 -13.770  34.920  1.00 34.10           C  
ATOM     69  ND1 HIS A   9      23.444 -12.953  34.586  1.00 34.81           N  
ATOM     70  CD2 HIS A   9      24.370 -14.892  34.175  1.00 37.37           C  
ATOM     71  CE1 HIS A   9      22.719 -13.544  33.650  1.00 36.42           C  
ATOM     72  NE2 HIS A   9      23.256 -14.723  33.384  1.00 36.38           N  
ATOM     73  N   ALA A  10      26.832 -11.531  38.068  1.00 36.26           N  
ATOM     74  CA  ALA A  10      27.737 -11.405  39.234  1.00 35.30           C  
ATOM     75  C   ALA A  10      27.155 -11.992  40.534  1.00 36.73           C  
ATOM     76  O   ALA A  10      25.930 -11.984  40.729  1.00 36.48           O  
ATOM     77  CB  ALA A  10      28.087  -9.922  39.447  1.00 37.15           C  
ATOM     78  N   VAL A  11      28.039 -12.490  41.397  1.00 33.18           N  
ATOM     79  CA  VAL A  11      27.706 -12.856  42.797  1.00 34.43           C  
ATOM     80  C   VAL A  11      28.146 -11.707  43.708  1.00 34.36           C  
ATOM     81  O   VAL A  11      29.304 -11.278  43.659  1.00 35.71           O  
ATOM     82  CB  VAL A  11      28.389 -14.156  43.246  1.00 32.92           C  
ATOM     83  CG1 VAL A  11      28.171 -14.401  44.772  1.00 34.57           C  
ATOM     84  CG2 VAL A  11      27.868 -15.357  42.471  1.00 35.15           C  
ATOM     85  N   GLY A  12      27.234 -11.242  44.553  1.00 37.58           N  
ATOM     86  CA  GLY A  12      27.545 -10.170  45.505  1.00 34.66           C  
ATOM     87  C   GLY A  12      27.582 -10.781  46.891  1.00 34.22           C  
ATOM     88  O   GLY A  12      26.717 -11.587  47.239  1.00 34.31           O  
ATOM     89  N   GLU A  13      28.602 -10.419  47.662  1.00 37.62           N  
ATOM     90  CA  GLU A  13      28.661 -10.812  49.064  1.00 37.10           C  
ATOM     91  C   GLU A  13      28.152  -9.671  49.944  1.00 36.98           C  
ATOM     92  O   GLU A  13      28.436  -8.503  49.661  1.00 34.82           O  
ATOM     93  CB  GLU A  13      30.088 -11.164  49.488  1.00 40.52           C  
ATOM     94  CG  GLU A  13      30.653 -12.390  48.809  1.00 45.52           C  
ATOM     95  CD  GLU A  13      32.007 -12.777  49.360  1.00 48.08           C  
ATOM     96  OE1 GLU A  13      32.271 -12.517  50.557  1.00 52.54           O  
ATOM     97  OE2 GLU A  13      32.808 -13.355  48.598  1.00 48.43           O  
ATOM     98  N   GLU A  14      27.447 -10.012  51.026  1.00 35.32           N  
ATOM     99  CA  GLU A  14      26.865  -8.984  51.902  1.00 38.16           C  
ATOM    100  C   GLU A  14      27.935  -7.983  52.349  1.00 35.88           C  
ATOM    101  O   GLU A  14      29.011  -8.387  52.783  1.00 35.26           O  
ATOM    102  CB  GLU A  14      26.176  -9.614  53.114  1.00 37.34           C  
ATOM    103  CG  GLU A  14      24.738 -10.061  52.829  1.00 42.98           C  
ATOM    104  CD  GLU A  14      24.145 -10.914  53.935  1.00 44.43           C  
ATOM    105  OE1 GLU A  14      24.595 -10.784  55.106  1.00 47.87           O  
ATOM    106  OE2 GLU A  14      23.227 -11.718  53.644  1.00 44.62           O  
ATOM    107  N   GLY A  15      27.645  -6.688  52.210  1.00 34.09           N  
ATOM    108  CA  GLY A  15      28.614  -5.633  52.567  1.00 33.35           C  
ATOM    109  C   GLY A  15      29.677  -5.316  51.534  1.00 33.85           C  
ATOM    110  O   GLY A  15      30.428  -4.351  51.681  1.00 31.92           O  
ATOM    111  N   GLY A  16      29.742  -6.120  50.467  1.00 32.64           N  
ATOM    112  CA  GLY A  16      30.675  -5.853  49.374  1.00 36.20           C  
ATOM    113  C   GLY A  16      30.056  -5.052  48.240  1.00 37.01           C  
ATOM    114  O   GLY A  16      29.030  -4.369  48.436  1.00 34.57           O  
ATOM    115  N   HIS A  17      30.673  -5.136  47.053  1.00 34.94           N  
ATOM    116  CA  HIS A  17      30.158  -4.501  45.840  1.00 35.57           C  
ATOM    117  C   HIS A  17      30.212  -5.436  44.605  1.00 35.79           C  
ATOM    118  O   HIS A  17      30.893  -6.477  44.644  1.00 35.17           O  
ATOM    119  CB  HIS A  17      30.915  -3.173  45.588  1.00 37.14           C  
ATOM    120  CG  HIS A  17      32.330  -3.346  45.097  1.00 39.54           C  
ATOM    121  ND1 HIS A  17      33.409  -3.398  45.943  1.00 38.68           N  
ATOM    122  CD2 HIS A  17      32.839  -3.453  43.845  1.00 37.62           C  
ATOM    123  CE1 HIS A  17      34.524  -3.544  45.248  1.00 38.43           C  
ATOM    124  NE2 HIS A  17      34.207  -3.565  43.967  1.00 36.60           N  
ATOM    125  N   VAL A  18      29.497  -5.086  43.523  1.00 35.35           N  
ATOM    126  CA  VAL A  18      29.668  -5.738  42.210  1.00 39.15           C  
ATOM    127  C   VAL A  18      29.640  -4.645  41.137  1.00 36.73           C  
ATOM    128  O   VAL A  18      29.224  -3.516  41.429  1.00 37.90           O  
ATOM    129  CB  VAL A  18      28.585  -6.822  41.879  1.00 40.91           C  
ATOM    130  CG1 VAL A  18      28.540  -7.915  42.964  1.00 45.02           C  
ATOM    131  CG2 VAL A  18      27.206  -6.188  41.632  1.00 40.49           C  
ATOM    132  N   LYS A  19      30.057  -4.964  39.906  1.00 38.77           N  
ATOM    133  CA  LYS A  19      29.978  -4.028  38.779  1.00 37.78           C  
ATOM    134  C   LYS A  19      29.327  -4.688  37.587  1.00 36.59           C  
ATOM    135  O   LYS A  19      29.431  -5.918  37.420  1.00 35.33           O  
ATOM    136  CB ALYS A  19      31.395  -3.565  38.374  0.50 37.85           C  
ATOM    137  CB BLYS A  19      31.346  -3.433  38.401  0.50 37.27           C  
ATOM    138  CG ALYS A  19      32.373  -4.719  38.070  0.50 38.04           C  
ATOM    139  CG BLYS A  19      32.206  -4.290  37.483  0.50 37.09           C  
ATOM    140  CD ALYS A  19      33.645  -4.278  37.318  0.50 40.46           C  
ATOM    141  CD BLYS A  19      33.249  -3.437  36.748  0.50 38.27           C  
ATOM    142  CE ALYS A  19      34.237  -5.408  36.445  0.50 37.75           C  
ATOM    143  CE BLYS A  19      34.622  -4.096  36.722  0.50 37.25           C  
ATOM    144  NZ ALYS A  19      34.158  -6.768  37.072  0.50 35.58           N  
ATOM    145  NZ BLYS A  19      35.242  -4.163  38.081  0.50 37.43           N  
ATOM    146  N   TYR A  20      28.685  -3.865  36.758  1.00 36.69           N  
ATOM    147  CA  TYR A  20      28.164  -4.278  35.464  1.00 35.30           C  
ATOM    148  C   TYR A  20      28.707  -3.334  34.368  1.00 36.68           C  
ATOM    149  O   TYR A  20      28.667  -2.112  34.504  1.00 36.42           O  
ATOM    150  CB  TYR A  20      26.619  -4.301  35.440  1.00 36.61           C  
ATOM    151  CG  TYR A  20      26.076  -5.343  36.382  1.00 34.39           C  
ATOM    152  CD1 TYR A  20      26.066  -6.710  36.029  1.00 34.05           C  
ATOM    153  CD2 TYR A  20      25.639  -4.989  37.668  1.00 37.10           C  
ATOM    154  CE1 TYR A  20      25.592  -7.684  36.936  1.00 35.74           C  
ATOM    155  CE2 TYR A  20      25.162  -5.935  38.528  1.00 37.24           C  
ATOM    156  CZ  TYR A  20      25.162  -7.280  38.172  1.00 38.50           C  
ATOM    157  OH  TYR A  20      24.710  -8.203  39.099  1.00 36.76           O  
ATOM    158  N   VAL A  21      29.175  -3.915  33.277  1.00 37.34           N  
ATOM    159  CA  VAL A  21      29.766  -3.141  32.187  1.00 35.60           C  
ATOM    160  C   VAL A  21      29.036  -3.465  30.892  1.00 35.31           C  
ATOM    161  O   VAL A  21      28.957  -4.648  30.465  1.00 36.38           O  
ATOM    162  CB  VAL A  21      31.288  -3.453  32.011  1.00 34.23           C  
ATOM    163  CG1 VAL A  21      31.841  -2.754  30.736  1.00 36.55           C  
ATOM    164  CG2 VAL A  21      32.083  -3.077  33.250  1.00 36.95           C  
ATOM    165  N   CYS A  22      28.527  -2.420  30.246  1.00 34.94           N  
ATOM    166  CA  CYS A  22      27.815  -2.592  28.987  1.00 34.26           C  
ATOM    167  C   CYS A  22      28.458  -1.724  27.906  1.00 32.39           C  
ATOM    168  O   CYS A  22      28.478  -0.489  28.006  1.00 34.18           O  
ATOM    169  CB  CYS A  22      26.314  -2.254  29.147  1.00 32.11           C  
ATOM    170  SG  CYS A  22      25.341  -2.444  27.558  1.00 35.24           S  
ATOM    171  N   LYS A  23      28.977  -2.370  26.866  1.00 35.50           N  
ATOM    172  CA  LYS A  23      29.603  -1.657  25.751  1.00 34.52           C  
ATOM    173  C   LYS A  23      28.618  -1.417  24.568  1.00 33.75           C  
ATOM    174  O   LYS A  23      27.970  -2.351  24.100  1.00 34.20           O  
ATOM    175  CB  LYS A  23      30.869  -2.436  25.306  1.00 35.92           C  
ATOM    176  CG  LYS A  23      31.876  -1.660  24.508  1.00 38.24           C  
ATOM    177  CD  LYS A  23      33.096  -2.536  24.214  1.00 36.40           C  
ATOM    178  CE  LYS A  23      33.908  -1.966  23.074  1.00 35.52           C  
ATOM    179  NZ  LYS A  23      34.892  -2.923  22.485  1.00 32.88           N  
ATOM    180  N   ILE A  24      28.471  -0.160  24.161  1.00 32.29           N  
ATOM    181  CA  ILE A  24      27.514   0.232  23.098  1.00 33.95           C  
ATOM    182  C   ILE A  24      28.156   0.410  21.726  1.00 32.58           C  
ATOM    183  O   ILE A  24      29.190   1.069  21.592  1.00 29.60           O  
ATOM    184  CB  ILE A  24      26.685   1.483  23.561  1.00 36.77           C  
ATOM    185  CG1 ILE A  24      25.835   1.108  24.780  1.00 39.64           C  
ATOM    186  CG2 ILE A  24      25.716   1.925  22.481  1.00 34.88           C  
ATOM    187  CD1 ILE A  24      25.942   2.057  26.001  1.00 41.07           C  
ATOM    188  N   GLU A  25      27.536  -0.207  20.709  1.00 24.62           N  
ATOM    189  CA  GLU A  25      27.941  -0.016  19.312  1.00 27.71           C  
ATOM    190  C   GLU A  25      27.118   1.114  18.703  1.00 28.52           C  
ATOM    191  O   GLU A  25      25.907   1.211  18.945  1.00 28.74           O  
ATOM    192  CB  GLU A  25      27.768  -1.315  18.536  1.00 26.15           C  
ATOM    193  CG  GLU A  25      28.545  -2.546  19.019  1.00 34.51           C  
ATOM    194  CD  GLU A  25      30.068  -2.342  19.190  1.00 39.28           C  
ATOM    195  OE1 GLU A  25      30.737  -1.847  18.256  1.00 41.01           O  
ATOM    196  OE2 GLU A  25      30.599  -2.737  20.257  1.00 38.50           O  
ATOM    197  N   ASN A  26      27.779   1.948  17.893  1.00 29.34           N  
ATOM    198  CA  ASN A  26      27.165   3.068  17.153  1.00 31.73           C  
ATOM    199  C   ASN A  26      26.433   4.096  18.030  1.00 33.68           C  
ATOM    200  O   ASN A  26      25.370   4.625  17.665  1.00 32.38           O  
ATOM    201  CB  ASN A  26      26.282   2.581  15.985  1.00 29.74           C  
ATOM    202  CG  ASN A  26      26.969   1.544  15.104  1.00 34.28           C  
ATOM    203  OD1 ASN A  26      27.785   1.883  14.245  1.00 27.16           O  
ATOM    204  ND2 ASN A  26      26.594   0.274  15.277  1.00 31.47           N  
ATOM    205  N   TYR A  27      27.010   4.339  19.209  1.00 32.51           N  
ATOM    206  CA  TYR A  27      26.671   5.498  20.031  1.00 34.21           C  
ATOM    207  C   TYR A  27      26.980   6.824  19.307  1.00 35.32           C  
ATOM    208  O   TYR A  27      27.842   6.884  18.408  1.00 37.23           O  
ATOM    209  CB  TYR A  27      27.414   5.415  21.372  1.00 34.55           C  
ATOM    210  CG  TYR A  27      28.923   5.430  21.241  1.00 33.09           C  
ATOM    211  CD1 TYR A  27      29.629   6.632  21.235  1.00 32.14           C  
ATOM    212  CD2 TYR A  27      29.645   4.243  21.088  1.00 28.60           C  
ATOM    213  CE1 TYR A  27      31.013   6.644  21.092  1.00 31.26           C  
ATOM    214  CE2 TYR A  27      31.020   4.248  20.970  1.00 26.39           C  
ATOM    215  CZ  TYR A  27      31.703   5.437  20.968  1.00 29.91           C  
ATOM    216  OH  TYR A  27      33.076   5.452  20.829  1.00 33.04           O  
ATOM    217  N   ASP A  28      26.264   7.881  19.684  1.00 35.31           N  
ATOM    218  CA  ASP A  28      26.539   9.232  19.177  1.00 35.54           C  
ATOM    219  C   ASP A  28      26.201  10.318  20.220  1.00 33.25           C  
ATOM    220  O   ASP A  28      25.984  10.002  21.404  1.00 34.67           O  
ATOM    221  CB  ASP A  28      25.853   9.480  17.818  1.00 37.16           C  
ATOM    222  CG  ASP A  28      24.327   9.516  17.904  1.00 38.82           C  
ATOM    223  OD1 ASP A  28      23.750   9.628  19.003  1.00 38.63           O  
ATOM    224  OD2 ASP A  28      23.692   9.465  16.830  1.00 42.91           O  
ATOM    225  N   GLN A  29      26.155  11.577  19.776  1.00 35.90           N  
ATOM    226  CA  GLN A  29      25.917  12.713  20.673  1.00 33.52           C  
ATOM    227  C   GLN A  29      24.536  12.721  21.318  1.00 33.00           C  
ATOM    228  O   GLN A  29      24.331  13.440  22.297  1.00 31.75           O  
ATOM    229  CB  GLN A  29      26.207  14.073  19.990  1.00 36.64           C  
ATOM    230  CG  GLN A  29      25.249  14.491  18.855  1.00 42.01           C  
ATOM    231  CD  GLN A  29      23.998  15.242  19.336  1.00 45.20           C  
ATOM    232  OE1 GLN A  29      24.069  16.122  20.196  1.00 47.77           O  
ATOM    233  NE2 GLN A  29      22.851  14.901  18.761  1.00 46.59           N  
ATOM    234  N   SER A  30      23.590  11.953  20.776  1.00 31.61           N  
ATOM    235  CA  SER A  30      22.248  11.898  21.371  1.00 33.46           C  
ATOM    236  C   SER A  30      22.020  10.712  22.336  1.00 34.12           C  
ATOM    237  O   SER A  30      20.972  10.624  22.997  1.00 33.82           O  
ATOM    238  CB  SER A  30      21.158  11.964  20.281  1.00 35.79           C  
ATOM    239  OG  SER A  30      20.956  10.701  19.676  1.00 36.03           O  
ATOM    240  N   THR A  31      23.000   9.810  22.441  1.00 34.56           N  
ATOM    241  CA  THR A  31      22.874   8.618  23.278  1.00 36.22           C  
ATOM    242  C   THR A  31      22.724   8.965  24.773  1.00 35.31           C  
ATOM    243  O   THR A  31      23.546   9.710  25.306  1.00 35.14           O  
ATOM    244  CB  THR A  31      24.088   7.684  23.074  1.00 35.33           C  
ATOM    245  OG1 THR A  31      24.217   7.381  21.678  1.00 31.47           O  
ATOM    246  CG2 THR A  31      23.917   6.395  23.862  1.00 39.43           C  
ATOM    247  N   GLN A  32      21.672   8.441  25.420  1.00 36.63           N  
ATOM    248  CA  GLN A  32      21.420   8.573  26.881  1.00 38.21           C  
ATOM    249  C   GLN A  32      21.226   7.173  27.498  1.00 36.59           C  
ATOM    250  O   GLN A  32      20.504   6.347  26.949  1.00 34.75           O  
ATOM    251  CB  GLN A  32      20.183   9.452  27.183  1.00 38.54           C  
ATOM    252  CG  GLN A  32      19.796   9.503  28.697  1.00 42.58           C  
ATOM    253  CD  GLN A  32      18.483  10.229  28.982  1.00 45.01           C  
ATOM    254  OE1 GLN A  32      17.388   9.714  28.697  1.00 49.51           O  
ATOM    255  NE2 GLN A  32      18.585  11.427  29.564  1.00 49.74           N  
ATOM    256  N   VAL A  33      21.829   6.926  28.665  1.00 35.81           N  
ATOM    257  CA  VAL A  33      21.774   5.592  29.296  1.00 35.23           C  
ATOM    258  C   VAL A  33      21.077   5.680  30.635  1.00 35.43           C  
ATOM    259  O   VAL A  33      21.338   6.619  31.396  1.00 32.68           O  
ATOM    260  CB  VAL A  33      23.200   5.044  29.558  1.00 35.77           C  
ATOM    261  CG1 VAL A  33      23.160   3.700  30.347  1.00 35.63           C  
ATOM    262  CG2 VAL A  33      23.953   4.905  28.258  1.00 38.33           C  
ATOM    263  N   THR A  34      20.150   4.751  30.888  1.00 32.96           N  
ATOM    264  CA  THR A  34      19.476   4.672  32.200  1.00 34.86           C  
ATOM    265  C   THR A  34      19.506   3.211  32.670  1.00 36.76           C  
ATOM    266  O   THR A  34      19.170   2.289  31.909  1.00 34.16           O  
ATOM    267  CB  THR A  34      17.988   5.161  32.118  1.00 34.34           C  
ATOM    268  OG1 THR A  34      17.922   6.475  31.530  1.00 34.79           O  
ATOM    269  CG2 THR A  34      17.331   5.213  33.504  1.00 36.84           C  
ATOM    270  N   TRP A  35      19.881   2.997  33.933  1.00 33.64           N  
ATOM    271  CA  TRP A  35      19.851   1.640  34.523  1.00 34.83           C  
ATOM    272  C   TRP A  35      18.602   1.424  35.400  1.00 33.80           C  
ATOM    273  O   TRP A  35      18.062   2.383  35.971  1.00 33.69           O  
ATOM    274  CB  TRP A  35      21.103   1.391  35.367  1.00 33.73           C  
ATOM    275  CG  TRP A  35      22.399   1.321  34.607  1.00 35.19           C  
ATOM    276  CD1 TRP A  35      23.137   2.372  34.145  1.00 34.77           C  
ATOM    277  CD2 TRP A  35      23.102   0.126  34.216  1.00 35.80           C  
ATOM    278  NE1 TRP A  35      24.270   1.904  33.506  1.00 34.44           N  
ATOM    279  CE2 TRP A  35      24.276   0.534  33.546  1.00 29.48           C  
ATOM    280  CE3 TRP A  35      22.867  -1.253  34.406  1.00 35.23           C  
ATOM    281  CZ2 TRP A  35      25.247  -0.387  33.068  1.00 33.76           C  
ATOM    282  CZ3 TRP A  35      23.811  -2.180  33.918  1.00 35.76           C  
ATOM    283  CH2 TRP A  35      24.998  -1.729  33.229  1.00 34.38           C  
ATOM    284  N   TYR A  36      18.158   0.166  35.500  1.00 32.90           N  
ATOM    285  CA  TYR A  36      17.030  -0.230  36.370  1.00 33.67           C  
ATOM    286  C   TYR A  36      17.389  -1.475  37.190  1.00 35.60           C  
ATOM    287  O   TYR A  36      18.108  -2.349  36.724  1.00 37.12           O  
ATOM    288  CB  TYR A  36      15.749  -0.512  35.567  1.00 33.04           C  
ATOM    289  CG  TYR A  36      15.229   0.647  34.726  1.00 32.11           C  
ATOM    290  CD1 TYR A  36      14.117   1.406  35.123  1.00 29.79           C  
ATOM    291  CD2 TYR A  36      15.832   0.958  33.498  1.00 32.80           C  
ATOM    292  CE1 TYR A  36      13.645   2.460  34.331  1.00 33.38           C  
ATOM    293  CE2 TYR A  36      15.392   1.995  32.748  1.00 33.02           C  
ATOM    294  CZ  TYR A  36      14.308   2.754  33.150  1.00 32.87           C  
ATOM    295  OH  TYR A  36      13.880   3.791  32.314  1.00 34.88           O  
ATOM    296  N   PHE A  37      16.895  -1.529  38.425  1.00 36.70           N  
ATOM    297  CA  PHE A  37      16.886  -2.764  39.214  1.00 36.38           C  
ATOM    298  C   PHE A  37      15.442  -3.218  39.338  1.00 36.12           C  
ATOM    299  O   PHE A  37      14.629  -2.542  39.976  1.00 34.58           O  
ATOM    300  CB  PHE A  37      17.492  -2.528  40.608  1.00 34.40           C  
ATOM    301  CG  PHE A  37      17.403  -3.734  41.551  1.00 35.76           C  
ATOM    302  CD1 PHE A  37      17.660  -5.033  41.098  1.00 34.72           C  
ATOM    303  CD2 PHE A  37      17.092  -3.545  42.902  1.00 36.48           C  
ATOM    304  CE1 PHE A  37      17.582  -6.137  41.946  1.00 34.61           C  
ATOM    305  CE2 PHE A  37      17.047  -4.648  43.782  1.00 35.56           C  
ATOM    306  CZ  PHE A  37      17.273  -5.941  43.301  1.00 33.71           C  
ATOM    307  N   GLY A  38      15.116  -4.367  38.749  1.00 35.89           N  
ATOM    308  CA  GLY A  38      13.710  -4.768  38.649  1.00 36.04           C  
ATOM    309  C   GLY A  38      12.883  -3.616  38.084  1.00 36.66           C  
ATOM    310  O   GLY A  38      13.206  -3.111  36.997  1.00 37.55           O  
ATOM    311  N   VAL A  39      11.846  -3.181  38.815  1.00 34.82           N  
ATOM    312  CA  VAL A  39      10.975  -2.074  38.347  1.00 36.99           C  
ATOM    313  C   VAL A  39      11.500  -0.662  38.625  1.00 37.03           C  
ATOM    314  O   VAL A  39      10.927   0.335  38.140  1.00 36.77           O  
ATOM    315  CB  VAL A  39       9.510  -2.186  38.892  1.00 36.03           C  
ATOM    316  CG1 VAL A  39       8.822  -3.475  38.418  1.00 39.75           C  
ATOM    317  CG2 VAL A  39       9.488  -2.093  40.414  1.00 37.85           C  
ATOM    318  N   ARG A  40      12.594  -0.581  39.379  1.00 36.09           N  
ATOM    319  CA  ARG A  40      13.095   0.691  39.937  1.00 36.10           C  
ATOM    320  C   ARG A  40      14.146   1.373  39.059  1.00 34.40           C  
ATOM    321  O   ARG A  40      15.168   0.752  38.710  1.00 34.06           O  
ATOM    322  CB  ARG A  40      13.690   0.430  41.327  1.00 36.65           C  
ATOM    323  CG  ARG A  40      12.672   0.000  42.365  1.00 39.83           C  
ATOM    324  CD  ARG A  40      13.265  -0.213  43.754  1.00 39.38           C  
ATOM    325  NE  ARG A  40      12.171  -0.568  44.663  1.00 43.36           N  
ATOM    326  CZ  ARG A  40      12.257  -1.395  45.699  1.00 43.49           C  
ATOM    327  NH1 ARG A  40      13.404  -1.959  46.007  1.00 43.09           N  
ATOM    328  NH2 ARG A  40      11.176  -1.650  46.427  1.00 44.64           N  
ATOM    329  N   GLN A  41      13.917   2.657  38.752  1.00 32.82           N  
ATOM    330  CA  GLN A  41      14.894   3.450  37.985  1.00 32.31           C  
ATOM    331  C   GLN A  41      16.028   3.889  38.926  1.00 33.37           C  
ATOM    332  O   GLN A  41      15.749   4.385  40.047  1.00 34.34           O  
ATOM    333  CB  GLN A  41      14.187   4.681  37.419  1.00 32.16           C  
ATOM    334  CG  GLN A  41      15.056   5.540  36.506  1.00 33.45           C  
ATOM    335  CD  GLN A  41      14.291   6.717  35.930  1.00 31.88           C  
ATOM    336  OE1 GLN A  41      13.059   6.675  35.760  1.00 31.67           O  
ATOM    337  NE2 GLN A  41      15.014   7.792  35.629  1.00 33.92           N  
ATOM    338  N   LEU A  42      17.277   3.723  38.474  1.00 34.00           N  
ATOM    339  CA  LEU A  42      18.467   4.030  39.308  1.00 34.31           C  
ATOM    340  C   LEU A  42      19.053   5.408  39.029  1.00 36.86           C  
ATOM    341  O   LEU A  42      18.944   5.915  37.919  1.00 37.27           O  
ATOM    342  CB  LEU A  42      19.576   2.965  39.149  1.00 33.77           C  
ATOM    343  CG  LEU A  42      19.150   1.500  39.305  1.00 33.12           C  
ATOM    344  CD1 LEU A  42      20.321   0.522  39.338  1.00 37.16           C  
ATOM    345  CD2 LEU A  42      18.270   1.399  40.585  1.00 32.95           C  
ATOM    346  N   GLU A  43      19.655   6.016  40.059  1.00 37.28           N  
ATOM    347  CA  GLU A  43      20.428   7.244  39.901  1.00 37.99           C  
ATOM    348  C   GLU A  43      21.637   7.233  40.837  1.00 39.51           C  
ATOM    349  O   GLU A  43      21.658   6.473  41.802  1.00 37.60           O  
ATOM    350  CB  GLU A  43      19.556   8.474  40.184  1.00 39.92           C  
ATOM    351  CG  GLU A  43      19.036   8.551  41.604  1.00 40.38           C  
ATOM    352  CD  GLU A  43      18.176   9.780  41.872  1.00 43.19           C  
ATOM    353  OE1 GLU A  43      18.041  10.638  40.977  1.00 46.79           O  
ATOM    354  OE2 GLU A  43      17.640   9.884  42.999  1.00 47.19           O  
ATOM    355  N   ASN A  44      22.629   8.081  40.563  1.00 38.97           N  
ATOM    356  CA  ASN A  44      23.743   8.287  41.504  1.00 41.03           C  
ATOM    357  C   ASN A  44      23.327   8.671  42.924  1.00 42.55           C  
ATOM    358  O   ASN A  44      22.517   9.584  43.107  1.00 41.19           O  
ATOM    359  CB  ASN A  44      24.715   9.308  40.938  1.00 42.24           C  
ATOM    360  CG  ASN A  44      25.709   8.679  40.007  1.00 41.72           C  
ATOM    361  OD1 ASN A  44      26.687   8.070  40.451  1.00 39.89           O  
ATOM    362  ND2 ASN A  44      25.465   8.804  38.693  1.00 40.49           N  
ATOM    363  N   SER A  45      23.920   8.001  43.920  1.00 38.54           N  
ATOM    364  CA  SER A  45      23.506   8.101  45.315  1.00 41.12           C  
ATOM    365  C   SER A  45      24.572   7.448  46.201  1.00 40.78           C  
ATOM    366  O   SER A  45      25.618   7.024  45.706  1.00 43.54           O  
ATOM    367  CB  SER A  45      22.181   7.361  45.489  1.00 41.06           C  
ATOM    368  OG  SER A  45      22.322   5.996  45.127  1.00 40.60           O  
ATOM    369  N   GLU A  46      24.296   7.337  47.497  1.00 41.40           N  
ATOM    370  CA  GLU A  46      25.168   6.588  48.398  1.00 42.76           C  
ATOM    371  C   GLU A  46      25.236   5.108  47.989  1.00 41.06           C  
ATOM    372  O   GLU A  46      26.210   4.423  48.281  1.00 42.13           O  
ATOM    373  CB  GLU A  46      24.690   6.733  49.843  1.00 42.15           C  
ATOM    374  CG  GLU A  46      24.897   8.131  50.435  1.00 46.22           C  
ATOM    375  CD  GLU A  46      24.387   8.272  51.863  1.00 46.73           C  
ATOM    376  OE1 GLU A  46      24.129   7.237  52.533  1.00 50.36           O  
ATOM    377  OE2 GLU A  46      24.251   9.430  52.324  1.00 50.07           O  
ATOM    378  N   LYS A  47      24.222   4.640  47.264  1.00 38.90           N  
ATOM    379  CA  LYS A  47      24.111   3.221  46.901  1.00 36.61           C  
ATOM    380  C   LYS A  47      24.699   2.824  45.531  1.00 34.71           C  
ATOM    381  O   LYS A  47      25.255   1.717  45.416  1.00 36.16           O  
ATOM    382  CB  LYS A  47      22.640   2.790  46.989  1.00 35.50           C  
ATOM    383  CG  LYS A  47      22.334   1.344  46.626  1.00 33.84           C  
ATOM    384  CD  LYS A  47      22.754   0.371  47.724  1.00 35.26           C  
ATOM    385  CE  LYS A  47      22.413  -1.083  47.381  1.00 34.32           C  
ATOM    386  NZ  LYS A  47      22.759  -1.987  48.554  1.00 34.90           N  
ATOM    387  N   TYR A  48      24.516   3.666  44.495  1.00 35.46           N  
ATOM    388  CA  TYR A  48      24.925   3.354  43.099  1.00 35.64           C  
ATOM    389  C   TYR A  48      25.922   4.364  42.506  1.00 37.27           C  
ATOM    390  O   TYR A  48      25.723   5.577  42.642  1.00 39.04           O  
ATOM    391  CB  TYR A  48      23.703   3.269  42.145  1.00 35.17           C  
ATOM    392  CG  TYR A  48      22.624   2.331  42.613  1.00 33.01           C  
ATOM    393  CD1 TYR A  48      22.816   0.952  42.597  1.00 34.38           C  
ATOM    394  CD2 TYR A  48      21.397   2.824  43.069  1.00 35.33           C  
ATOM    395  CE1 TYR A  48      21.806   0.075  43.033  1.00 32.56           C  
ATOM    396  CE2 TYR A  48      20.387   1.953  43.511  1.00 33.81           C  
ATOM    397  CZ  TYR A  48      20.607   0.596  43.503  1.00 32.03           C  
ATOM    398  OH  TYR A  48      19.616  -0.275  43.911  1.00 33.14           O  
ATOM    399  N   GLU A  49      26.966   3.862  41.828  1.00 35.36           N  
ATOM    400  CA  GLU A  49      27.963   4.722  41.178  1.00 35.08           C  
ATOM    401  C   GLU A  49      27.819   4.429  39.680  1.00 34.35           C  
ATOM    402  O   GLU A  49      28.123   3.320  39.240  1.00 35.61           O  
ATOM    403  CB  GLU A  49      29.404   4.439  41.676  1.00 36.15           C  
ATOM    404  CG  GLU A  49      30.460   5.428  41.210  1.00 38.74           C  
ATOM    405  CD  GLU A  49      31.927   4.957  41.435  1.00 40.89           C  
ATOM    406  OE1 GLU A  49      32.194   4.141  42.335  1.00 40.62           O  
ATOM    407  OE2 GLU A  49      32.824   5.416  40.686  1.00 51.12           O  
ATOM    408  N   ILE A  50      27.297   5.412  38.935  1.00 34.53           N  
ATOM    409  CA  ILE A  50      26.894   5.206  37.539  1.00 35.92           C  
ATOM    410  C   ILE A  50      27.627   6.209  36.677  1.00 34.74           C  
ATOM    411  O   ILE A  50      27.617   7.423  36.947  1.00 32.65           O  
ATOM    412  CB  ILE A  50      25.366   5.390  37.341  1.00 36.84           C  
ATOM    413  CG1 ILE A  50      24.573   4.397  38.208  1.00 40.00           C  
ATOM    414  CG2 ILE A  50      24.964   5.192  35.858  1.00 38.00           C  
ATOM    415  CD1 ILE A  50      23.057   4.701  38.270  1.00 39.38           C  
ATOM    416  N   THR A  51      28.254   5.687  35.619  1.00 33.62           N  
ATOM    417  CA  THR A  51      28.953   6.542  34.658  1.00 31.05           C  
ATOM    418  C   THR A  51      28.650   6.103  33.211  1.00 33.23           C  
ATOM    419  O   THR A  51      28.387   4.928  32.941  1.00 34.13           O  
ATOM    420  CB  THR A  51      30.490   6.565  34.890  1.00 32.09           C  
ATOM    421  OG1 THR A  51      30.984   5.218  34.871  1.00 33.74           O  
ATOM    422  CG2 THR A  51      30.847   7.208  36.266  1.00 31.11           C  
ATOM    423  N   TYR A  52      28.675   7.068  32.299  1.00 34.55           N  
ATOM    424  CA  TYR A  52      28.622   6.761  30.855  1.00 33.51           C  
ATOM    425  C   TYR A  52      29.498   7.723  30.076  1.00 34.43           C  
ATOM    426  O   TYR A  52      29.328   8.938  30.194  1.00 34.08           O  
ATOM    427  CB  TYR A  52      27.194   6.776  30.272  1.00 34.69           C  
ATOM    428  CG  TYR A  52      27.251   6.687  28.758  1.00 34.15           C  
ATOM    429  CD1 TYR A  52      27.561   5.478  28.123  1.00 30.58           C  
ATOM    430  CD2 TYR A  52      27.076   7.826  27.968  1.00 34.31           C  
ATOM    431  CE1 TYR A  52      27.684   5.404  26.705  1.00 33.03           C  
ATOM    432  CE2 TYR A  52      27.202   7.769  26.578  1.00 34.77           C  
ATOM    433  CZ  TYR A  52      27.508   6.555  25.954  1.00 34.49           C  
ATOM    434  OH  TYR A  52      27.614   6.516  24.575  1.00 36.03           O  
ATOM    435  N   GLU A  53      30.426   7.181  29.275  1.00 34.27           N  
ATOM    436  CA  GLU A  53      31.317   7.985  28.408  1.00 36.78           C  
ATOM    437  C   GLU A  53      31.785   7.126  27.243  1.00 33.93           C  
ATOM    438  O   GLU A  53      32.152   5.959  27.464  1.00 34.51           O  
ATOM    439  CB  GLU A  53      32.568   8.472  29.162  1.00 38.34           C  
ATOM    440  CG  GLU A  53      32.322   8.861  30.614  1.00 42.52           C  
ATOM    441  CD  GLU A  53      33.486   9.545  31.279  1.00 44.95           C  
ATOM    442  OE1 GLU A  53      34.397  10.020  30.559  1.00 48.22           O  
ATOM    443  OE2 GLU A  53      33.473   9.645  32.534  1.00 48.04           O  
ATOM    444  N   ASP A  54      31.769   7.687  26.020  1.00 32.57           N  
ATOM    445  CA  ASP A  54      32.453   7.096  24.876  1.00 30.20           C  
ATOM    446  C   ASP A  54      32.050   5.623  24.653  1.00 29.30           C  
ATOM    447  O   ASP A  54      32.909   4.759  24.433  1.00 30.77           O  
ATOM    448  CB  ASP A  54      33.968   7.256  25.071  1.00 28.87           C  
ATOM    449  CG  ASP A  54      34.780   6.942  23.827  1.00 31.91           C  
ATOM    450  OD1 ASP A  54      34.350   7.221  22.685  1.00 30.47           O  
ATOM    451  OD2 ASP A  54      35.904   6.441  23.989  1.00 35.66           O  
ATOM    452  N   GLY A  55      30.744   5.350  24.723  1.00 29.62           N  
ATOM    453  CA  GLY A  55      30.197   4.001  24.485  1.00 32.28           C  
ATOM    454  C   GLY A  55      30.351   2.949  25.556  1.00 35.94           C  
ATOM    455  O   GLY A  55      30.043   1.761  25.347  1.00 37.29           O  
ATOM    456  N   VAL A  56      30.875   3.356  26.702  1.00 31.42           N  
ATOM    457  CA  VAL A  56      30.970   2.436  27.853  1.00 35.64           C  
ATOM    458  C   VAL A  56      30.105   2.882  29.038  1.00 34.61           C  
ATOM    459  O   VAL A  56      30.364   3.938  29.669  1.00 34.47           O  
ATOM    460  CB  VAL A  56      32.445   2.221  28.270  1.00 33.07           C  
ATOM    461  CG1 VAL A  56      32.571   1.130  29.367  1.00 35.66           C  
ATOM    462  CG2 VAL A  56      33.302   1.851  27.042  1.00 34.57           C  
ATOM    463  N   ALA A  57      29.080   2.077  29.337  1.00 34.13           N  
ATOM    464  CA  ALA A  57      28.234   2.257  30.539  1.00 34.10           C  
ATOM    465  C   ALA A  57      28.667   1.352  31.697  1.00 35.59           C  
ATOM    466  O   ALA A  57      28.822   0.130  31.543  1.00 34.29           O  
ATOM    467  CB  ALA A  57      26.753   2.008  30.195  1.00 33.38           C  
ATOM    468  N   ILE A  58      28.822   1.940  32.884  1.00 34.22           N  
ATOM    469  CA  ILE A  58      29.260   1.195  34.067  1.00 36.46           C  
ATOM    470  C   ILE A  58      28.359   1.484  35.277  1.00 35.94           C  
ATOM    471  O   ILE A  58      28.131   2.651  35.643  1.00 36.34           O  
ATOM    472  CB  ILE A  58      30.765   1.479  34.425  1.00 37.82           C  
ATOM    473  CG1 ILE A  58      31.696   1.218  33.235  1.00 38.41           C  
ATOM    474  CG2 ILE A  58      31.177   0.724  35.690  1.00 38.76           C  
ATOM    475  CD1 ILE A  58      33.196   1.537  33.523  1.00 38.33           C  
ATOM    476  N   LEU A  59      27.805   0.420  35.845  1.00 36.74           N  
ATOM    477  CA  LEU A  59      27.049   0.472  37.095  1.00 35.69           C  
ATOM    478  C   LEU A  59      27.801  -0.252  38.208  1.00 35.67           C  
ATOM    479  O   LEU A  59      28.094  -1.435  38.115  1.00 33.98           O  
ATOM    480  CB  LEU A  59      25.629  -0.143  36.940  1.00 33.86           C  
ATOM    481  CG  LEU A  59      24.886  -0.380  38.277  1.00 34.66           C  
ATOM    482  CD1 LEU A  59      24.458   0.942  38.957  1.00 35.78           C  
ATOM    483  CD2 LEU A  59      23.651  -1.287  38.047  1.00 35.85           C  
ATOM    484  N   TYR A  60      28.102   0.466  39.282  1.00 34.24           N  
ATOM    485  CA  TYR A  60      28.672  -0.138  40.487  1.00 37.77           C  
ATOM    486  C   TYR A  60      27.647  -0.124  41.614  1.00 37.11           C  
ATOM    487  O   TYR A  60      27.144   0.940  41.987  1.00 37.47           O  
ATOM    488  CB  TYR A  60      29.924   0.604  40.920  1.00 39.48           C  
ATOM    489  CG  TYR A  60      31.202   0.030  40.371  1.00 45.20           C  
ATOM    490  CD1 TYR A  60      31.552   0.243  39.050  1.00 46.64           C  
ATOM    491  CD2 TYR A  60      32.056  -0.722  41.167  1.00 43.39           C  
ATOM    492  CE1 TYR A  60      32.725  -0.269  38.527  1.00 48.92           C  
ATOM    493  CE2 TYR A  60      33.241  -1.254  40.653  1.00 47.86           C  
ATOM    494  CZ  TYR A  60      33.560  -1.027  39.323  1.00 46.81           C  
ATOM    495  OH  TYR A  60      34.740  -1.500  38.767  1.00 47.47           O  
ATOM    496  N   VAL A  61      27.351  -1.312  42.148  1.00 37.38           N  
ATOM    497  CA  VAL A  61      26.416  -1.453  43.299  1.00 37.43           C  
ATOM    498  C   VAL A  61      27.155  -1.674  44.613  1.00 37.92           C  
ATOM    499  O   VAL A  61      27.912  -2.636  44.712  1.00 38.52           O  
ATOM    500  CB  VAL A  61      25.458  -2.661  43.113  1.00 36.82           C  
ATOM    501  CG1 VAL A  61      24.445  -2.709  44.289  1.00 38.70           C  
ATOM    502  CG2 VAL A  61      24.736  -2.612  41.743  1.00 37.60           C  
ATOM    503  N   LYS A  62      26.923  -0.796  45.610  1.00 36.20           N  
ATOM    504  CA  LYS A  62      27.623  -0.764  46.913  1.00 35.66           C  
ATOM    505  C   LYS A  62      26.830  -1.363  48.084  1.00 33.99           C  
ATOM    506  O   LYS A  62      25.612  -1.491  48.000  1.00 33.74           O  
ATOM    507  CB ALYS A  62      27.986   0.682  47.277  0.50 36.74           C  
ATOM    508  CB BLYS A  62      27.994   0.686  47.265  0.50 36.76           C  
ATOM    509  CG ALYS A  62      29.147   1.268  46.490  0.50 35.13           C  
ATOM    510  CG BLYS A  62      29.195   1.276  46.513  0.50 36.59           C  
ATOM    511  CD ALYS A  62      28.994   1.032  44.991  0.50 31.99           C  
ATOM    512  CD BLYS A  62      28.966   1.469  45.000  0.50 35.32           C  
ATOM    513  CE ALYS A  62      30.303   0.550  44.434  0.50 30.46           C  
ATOM    514  CE BLYS A  62      30.289   1.830  44.326  0.50 33.14           C  
ATOM    515  NZ ALYS A  62      30.354   0.751  42.969  0.50 32.93           N  
ATOM    516  NZ BLYS A  62      31.316   0.731  44.472  0.50 33.59           N  
ATOM    517  N   ASP A  63      27.527  -1.645  49.194  1.00 32.18           N  
ATOM    518  CA  ASP A  63      26.921  -2.123  50.448  1.00 34.82           C  
ATOM    519  C   ASP A  63      25.874  -3.204  50.203  1.00 30.66           C  
ATOM    520  O   ASP A  63      24.707  -3.041  50.528  1.00 31.44           O  
ATOM    521  CB  ASP A  63      26.296  -0.958  51.246  1.00 34.23           C  
ATOM    522  CG  ASP A  63      27.306   0.066  51.687  1.00 39.86           C  
ATOM    523  OD1 ASP A  63      28.142  -0.262  52.555  1.00 41.35           O  
ATOM    524  OD2 ASP A  63      27.239   1.220  51.201  1.00 44.58           O  
ATOM    525  N   ILE A  64      26.279  -4.309  49.590  1.00 32.86           N  
ATOM    526  CA  ILE A  64      25.308  -5.332  49.142  1.00 33.59           C  
ATOM    527  C   ILE A  64      24.472  -5.914  50.296  1.00 31.50           C  
ATOM    528  O   ILE A  64      24.983  -6.118  51.441  1.00 30.78           O  
ATOM    529  CB  ILE A  64      26.021  -6.451  48.283  1.00 32.06           C  
ATOM    530  CG1 ILE A  64      26.435  -5.887  46.900  1.00 32.86           C  
ATOM    531  CG2 ILE A  64      25.180  -7.775  48.259  1.00 31.14           C  
ATOM    532  CD1 ILE A  64      25.311  -5.676  45.932  1.00 37.51           C  
ATOM    533  N   THR A  65      23.170  -6.109  50.054  1.00 30.91           N  
ATOM    534  CA  THR A  65      22.295  -6.854  51.002  1.00 33.35           C  
ATOM    535  C   THR A  65      21.510  -7.917  50.218  1.00 32.11           C  
ATOM    536  O   THR A  65      21.522  -7.929  48.980  1.00 33.03           O  
ATOM    537  CB  THR A  65      21.239  -5.955  51.768  1.00 33.72           C  
ATOM    538  OG1 THR A  65      20.205  -5.524  50.849  1.00 34.25           O  
ATOM    539  CG2 THR A  65      21.897  -4.751  52.444  1.00 34.18           C  
ATOM    540  N   LYS A  66      20.810  -8.798  50.926  1.00 32.71           N  
ATOM    541  CA  LYS A  66      19.900  -9.756  50.270  1.00 34.37           C  
ATOM    542  C   LYS A  66      18.868  -9.084  49.340  1.00 32.63           C  
ATOM    543  O   LYS A  66      18.457  -9.680  48.337  1.00 36.17           O  
ATOM    544  CB  LYS A  66      19.208 -10.653  51.313  1.00 33.65           C  
ATOM    545  CG  LYS A  66      20.151 -11.717  51.915  1.00 32.80           C  
ATOM    546  CD  LYS A  66      19.380 -12.694  52.795  1.00 34.02           C  
ATOM    547  CE  LYS A  66      20.282 -13.731  53.409  1.00 36.18           C  
ATOM    548  NZ  LYS A  66      20.970 -13.159  54.590  1.00 34.04           N  
ATOM    549  N   LEU A  67      18.452  -7.849  49.660  1.00 33.35           N  
ATOM    550  CA  LEU A  67      17.489  -7.100  48.809  1.00 33.31           C  
ATOM    551  C   LEU A  67      17.959  -6.900  47.374  1.00 33.47           C  
ATOM    552  O   LEU A  67      17.142  -6.712  46.479  1.00 36.17           O  
ATOM    553  CB  LEU A  67      17.174  -5.723  49.376  1.00 32.25           C  
ATOM    554  CG  LEU A  67      16.379  -5.668  50.683  1.00 30.94           C  
ATOM    555  CD1 LEU A  67      16.281  -4.215  51.120  1.00 35.98           C  
ATOM    556  CD2 LEU A  67      14.970  -6.265  50.558  1.00 35.25           C  
ATOM    557  N   ASP A  68      19.280  -6.921  47.178  1.00 34.41           N  
ATOM    558  CA  ASP A  68      19.894  -6.590  45.889  1.00 31.53           C  
ATOM    559  C   ASP A  68      19.874  -7.724  44.860  1.00 35.26           C  
ATOM    560  O   ASP A  68      20.212  -7.484  43.703  1.00 34.67           O  
ATOM    561  CB  ASP A  68      21.340  -6.021  46.099  1.00 31.62           C  
ATOM    562  CG  ASP A  68      21.337  -4.730  46.927  1.00 33.16           C  
ATOM    563  OD1 ASP A  68      20.474  -3.836  46.677  1.00 34.45           O  
ATOM    564  OD2 ASP A  68      22.168  -4.616  47.864  1.00 35.17           O  
ATOM    565  N   ASP A  69      19.482  -8.931  45.284  1.00 32.67           N  
ATOM    566  CA  ASP A  69      19.381 -10.103  44.400  1.00 34.61           C  
ATOM    567  C   ASP A  69      18.225  -9.893  43.397  1.00 36.85           C  
ATOM    568  O   ASP A  69      17.074  -9.664  43.800  1.00 37.83           O  
ATOM    569  CB  ASP A  69      19.235 -11.393  45.242  1.00 36.38           C  
ATOM    570  CG  ASP A  69      19.282 -12.683  44.403  1.00 34.85           C  
ATOM    571  OD1 ASP A  69      18.472 -12.794  43.451  1.00 37.44           O  
ATOM    572  OD2 ASP A  69      20.104 -13.589  44.719  1.00 35.05           O  
ATOM    573  N   GLY A  70      18.546  -9.960  42.101  1.00 36.45           N  
ATOM    574  CA  GLY A  70      17.547  -9.862  41.004  1.00 36.15           C  
ATOM    575  C   GLY A  70      18.121  -9.536  39.631  1.00 39.54           C  
ATOM    576  O   GLY A  70      19.275  -9.898  39.300  1.00 38.37           O  
ATOM    577  N   THR A  71      17.313  -8.831  38.837  1.00 37.13           N  
ATOM    578  CA  THR A  71      17.650  -8.517  37.449  1.00 37.14           C  
ATOM    579  C   THR A  71      17.961  -7.032  37.248  1.00 39.64           C  
ATOM    580  O   THR A  71      17.173  -6.180  37.689  1.00 39.20           O  
ATOM    581  CB  THR A  71      16.503  -8.931  36.511  1.00 40.32           C  
ATOM    582  OG1 THR A  71      16.204 -10.325  36.690  1.00 38.08           O  
ATOM    583  CG2 THR A  71      16.896  -8.685  35.071  1.00 37.95           C  
ATOM    584  N   TYR A  72      19.085  -6.741  36.570  1.00 36.53           N  
ATOM    585  CA  TYR A  72      19.527  -5.355  36.287  1.00 36.82           C  
ATOM    586  C   TYR A  72      19.453  -5.122  34.768  1.00 37.24           C  
ATOM    587  O   TYR A  72      19.824  -6.015  33.998  1.00 40.93           O  
ATOM    588  CB  TYR A  72      20.956  -5.117  36.839  1.00 35.81           C  
ATOM    589  CG  TYR A  72      20.978  -5.077  38.357  1.00 38.56           C  
ATOM    590  CD1 TYR A  72      21.056  -3.868  39.033  1.00 38.36           C  
ATOM    591  CD2 TYR A  72      20.841  -6.255  39.103  1.00 39.46           C  
ATOM    592  CE1 TYR A  72      21.002  -3.821  40.450  1.00 34.90           C  
ATOM    593  CE2 TYR A  72      20.802  -6.223  40.514  1.00 37.13           C  
ATOM    594  CZ  TYR A  72      20.878  -5.011  41.169  1.00 35.80           C  
ATOM    595  OH  TYR A  72      20.845  -5.020  42.568  1.00 35.56           O  
ATOM    596  N   ARG A  73      18.926  -3.967  34.344  1.00 36.69           N  
ATOM    597  CA  ARG A  73      18.759  -3.615  32.913  1.00 35.82           C  
ATOM    598  C   ARG A  73      19.542  -2.346  32.613  1.00 37.47           C  
ATOM    599  O   ARG A  73      19.487  -1.385  33.375  1.00 35.33           O  
ATOM    600  CB  ARG A  73      17.279  -3.373  32.577  1.00 33.15           C  
ATOM    601  CG  ARG A  73      16.947  -2.816  31.164  1.00 35.28           C  
ATOM    602  CD  ARG A  73      15.425  -2.564  31.058  1.00 36.15           C  
ATOM    603  NE  ARG A  73      14.962  -2.164  29.731  1.00 39.28           N  
ATOM    604  CZ  ARG A  73      13.679  -2.117  29.365  1.00 39.25           C  
ATOM    605  NH1 ARG A  73      12.715  -2.463  30.216  1.00 42.87           N  
ATOM    606  NH2 ARG A  73      13.344  -1.753  28.139  1.00 39.62           N  
ATOM    607  N   CYS A  74      20.283  -2.352  31.506  1.00 33.87           N  
ATOM    608  CA  CYS A  74      20.893  -1.121  30.956  1.00 32.14           C  
ATOM    609  C   CYS A  74      20.073  -0.741  29.734  1.00 33.68           C  
ATOM    610  O   CYS A  74      20.041  -1.491  28.730  1.00 35.24           O  
ATOM    611  CB  CYS A  74      22.346  -1.373  30.533  1.00 33.00           C  
ATOM    612  SG  CYS A  74      23.198   0.082  29.824  1.00 36.58           S  
ATOM    613  N   LYS A  75      19.371   0.389  29.830  1.00 32.41           N  
ATOM    614  CA  LYS A  75      18.552   0.908  28.712  1.00 33.19           C  
ATOM    615  C   LYS A  75      19.227   2.066  27.960  1.00 34.11           C  
ATOM    616  O   LYS A  75      19.569   3.106  28.534  1.00 33.12           O  
ATOM    617  CB  LYS A  75      17.119   1.311  29.183  1.00 33.03           C  
ATOM    618  CG  LYS A  75      16.211   1.788  28.037  1.00 35.37           C  
ATOM    619  CD  LYS A  75      14.835   2.180  28.580  1.00 38.49           C  
ATOM    620  CE  LYS A  75      13.971   2.801  27.499  1.00 40.81           C  
ATOM    621  NZ  LYS A  75      12.506   2.538  27.699  1.00 44.16           N  
ATOM    622  N   VAL A  76      19.373   1.898  26.644  1.00 33.77           N  
ATOM    623  CA  VAL A  76      20.072   2.879  25.808  1.00 36.11           C  
ATOM    624  C   VAL A  76      19.136   3.492  24.780  1.00 34.89           C  
ATOM    625  O   VAL A  76      18.432   2.776  24.082  1.00 36.06           O  
ATOM    626  CB  VAL A  76      21.337   2.268  25.151  1.00 31.73           C  
ATOM    627  CG1 VAL A  76      22.254   3.350  24.795  1.00 32.44           C  
ATOM    628  CG2 VAL A  76      22.082   1.374  26.200  1.00 37.00           C  
ATOM    629  N   VAL A  77      19.090   4.822  24.737  1.00 35.63           N  
ATOM    630  CA  VAL A  77      18.157   5.547  23.858  1.00 35.10           C  
ATOM    631  C   VAL A  77      18.893   6.651  23.124  1.00 36.78           C  
ATOM    632  O   VAL A  77      19.655   7.404  23.736  1.00 32.35           O  
ATOM    633  CB  VAL A  77      16.974   6.182  24.661  1.00 34.55           C  
ATOM    634  CG1 VAL A  77      16.028   6.950  23.756  1.00 37.54           C  
ATOM    635  CG2 VAL A  77      16.210   5.122  25.415  1.00 35.83           C  
ATOM    636  N   ASN A  78      18.678   6.719  21.809  1.00 36.65           N  
ATOM    637  CA  ASN A  78      19.030   7.903  21.012  1.00 39.43           C  
ATOM    638  C   ASN A  78      17.941   8.383  20.072  1.00 38.83           C  
ATOM    639  O   ASN A  78      16.782   7.991  20.206  1.00 38.55           O  
ATOM    640  CB  ASN A  78      20.388   7.773  20.299  1.00 40.15           C  
ATOM    641  CG  ASN A  78      20.393   6.769  19.166  1.00 43.26           C  
ATOM    642  OD1 ASN A  78      19.426   6.038  18.930  1.00 46.23           O  
ATOM    643  ND2 ASN A  78      21.514   6.724  18.454  1.00 42.72           N  
ATOM    644  N   ASP A  79      18.342   9.232  19.124  1.00 38.62           N  
ATOM    645  CA  ASP A  79      17.452   9.890  18.159  1.00 39.31           C  
ATOM    646  C   ASP A  79      16.896   8.947  17.099  1.00 39.73           C  
ATOM    647  O   ASP A  79      16.064   9.353  16.264  1.00 40.87           O  
ATOM    648  CB  ASP A  79      18.214  11.027  17.473  1.00 38.14           C  
ATOM    649  CG  ASP A  79      18.289  12.295  18.318  1.00 36.71           C  
ATOM    650  OD1 ASP A  79      17.668  12.366  19.400  1.00 36.94           O  
ATOM    651  OD2 ASP A  79      18.958  13.249  17.873  1.00 39.79           O  
ATOM    652  N   TYR A  80      17.369   7.707  17.102  1.00 40.94           N  
ATOM    653  CA  TYR A  80      17.007   6.730  16.073  1.00 45.86           C  
ATOM    654  C   TYR A  80      16.220   5.545  16.618  1.00 44.67           C  
ATOM    655  O   TYR A  80      15.407   4.959  15.900  1.00 46.22           O  
ATOM    656  CB  TYR A  80      18.254   6.251  15.325  1.00 48.34           C  
ATOM    657  CG  TYR A  80      18.931   7.347  14.530  1.00 51.30           C  
ATOM    658  CD1 TYR A  80      18.296   7.933  13.435  1.00 51.10           C  
ATOM    659  CD2 TYR A  80      20.202   7.805  14.877  1.00 52.23           C  
ATOM    660  CE1 TYR A  80      18.909   8.946  12.702  1.00 52.67           C  
ATOM    661  CE2 TYR A  80      20.827   8.818  14.146  1.00 51.93           C  
ATOM    662  CZ  TYR A  80      20.174   9.382  13.065  1.00 51.88           C  
ATOM    663  OH  TYR A  80      20.782  10.383  12.337  1.00 52.71           O  
ATOM    664  N   GLY A  81      16.462   5.200  17.876  1.00 43.55           N  
ATOM    665  CA  GLY A  81      15.727   4.127  18.530  1.00 39.75           C  
ATOM    666  C   GLY A  81      16.277   3.815  19.906  1.00 38.89           C  
ATOM    667  O   GLY A  81      16.801   4.694  20.589  1.00 36.70           O  
ATOM    668  N   GLU A  82      16.142   2.556  20.313  1.00 37.67           N  
ATOM    669  CA  GLU A  82      16.598   2.113  21.631  1.00 37.53           C  
ATOM    670  C   GLU A  82      16.979   0.628  21.619  1.00 35.87           C  
ATOM    671  O   GLU A  82      16.660  -0.086  20.647  1.00 36.65           O  
ATOM    672  CB  GLU A  82      15.531   2.421  22.685  1.00 39.77           C  
ATOM    673  CG  GLU A  82      14.307   1.516  22.714  1.00 42.32           C  
ATOM    674  CD  GLU A  82      13.403   1.824  23.907  1.00 43.55           C  
ATOM    675  OE1 GLU A  82      12.805   2.926  23.943  1.00 45.24           O  
ATOM    676  OE2 GLU A  82      13.297   0.965  24.807  1.00 47.29           O  
ATOM    677  N   ASP A  83      17.719   0.204  22.647  1.00 35.12           N  
ATOM    678  CA  ASP A  83      18.068  -1.202  22.918  1.00 34.76           C  
ATOM    679  C   ASP A  83      18.313  -1.359  24.430  1.00 34.91           C  
ATOM    680  O   ASP A  83      18.605  -0.373  25.134  1.00 36.41           O  
ATOM    681  CB  ASP A  83      19.333  -1.597  22.127  1.00 35.22           C  
ATOM    682  CG  ASP A  83      19.555  -3.138  22.020  1.00 38.67           C  
ATOM    683  OD1 ASP A  83      18.686  -3.960  22.392  1.00 36.83           O  
ATOM    684  OD2 ASP A  83      20.616  -3.530  21.490  1.00 36.02           O  
ATOM    685  N   SER A  84      18.195  -2.589  24.930  1.00 31.57           N  
ATOM    686  CA  SER A  84      18.496  -2.876  26.355  1.00 31.50           C  
ATOM    687  C   SER A  84      19.251  -4.205  26.476  1.00 30.46           C  
ATOM    688  O   SER A  84      19.066  -5.117  25.630  1.00 33.74           O  
ATOM    689  CB  SER A  84      17.186  -3.004  27.154  1.00 33.53           C  
ATOM    690  OG  SER A  84      16.436  -1.796  27.200  1.00 36.67           O  
ATOM    691  N   SER A  85      20.007  -4.339  27.579  1.00 32.72           N  
ATOM    692  CA  SER A  85      20.758  -5.553  27.898  1.00 29.20           C  
ATOM    693  C   SER A  85      20.523  -5.833  29.390  1.00 32.96           C  
ATOM    694  O   SER A  85      20.252  -4.894  30.130  1.00 33.50           O  
ATOM    695  CB  SER A  85      22.243  -5.356  27.524  1.00 28.72           C  
ATOM    696  OG  SER A  85      22.400  -5.344  26.091  1.00 34.99           O  
ATOM    697  N   TYR A  86      20.567  -7.114  29.780  1.00 32.26           N  
ATOM    698  CA  TYR A  86      20.141  -7.563  31.125  1.00 35.76           C  
ATOM    699  C   TYR A  86      21.193  -8.474  31.778  1.00 35.63           C  
ATOM    700  O   TYR A  86      21.922  -9.170  31.073  1.00 37.65           O  
ATOM    701  CB  TYR A  86      18.806  -8.319  30.995  1.00 34.66           C  
ATOM    702  CG  TYR A  86      17.649  -7.490  30.471  1.00 35.65           C  
ATOM    703  CD1 TYR A  86      16.783  -6.841  31.334  1.00 37.26           C  
ATOM    704  CD2 TYR A  86      17.408  -7.378  29.096  1.00 34.51           C  
ATOM    705  CE1 TYR A  86      15.708  -6.081  30.856  1.00 36.60           C  
ATOM    706  CE2 TYR A  86      16.323  -6.619  28.603  1.00 37.24           C  
ATOM    707  CZ  TYR A  86      15.483  -5.972  29.502  1.00 36.32           C  
ATOM    708  OH  TYR A  86      14.405  -5.221  29.082  1.00 38.75           O  
ATOM    709  N   ALA A  87      21.275  -8.472  33.123  1.00 36.89           N  
ATOM    710  CA  ALA A  87      22.088  -9.465  33.840  1.00 36.44           C  
ATOM    711  C   ALA A  87      21.598  -9.626  35.285  1.00 37.32           C  
ATOM    712  O   ALA A  87      20.848  -8.781  35.769  1.00 35.95           O  
ATOM    713  CB  ALA A  87      23.575  -9.061  33.799  1.00 39.81           C  
ATOM    714  N   GLU A  88      22.010 -10.715  35.945  1.00 35.76           N  
ATOM    715  CA  GLU A  88      21.535 -11.061  37.279  1.00 35.39           C  
ATOM    716  C   GLU A  88      22.586 -10.707  38.331  1.00 33.84           C  
ATOM    717  O   GLU A  88      23.810 -10.698  38.032  1.00 34.65           O  
ATOM    718  CB  GLU A  88      21.260 -12.564  37.345  1.00 35.30           C  
ATOM    719  CG  GLU A  88      20.240 -13.026  36.300  1.00 35.74           C  
ATOM    720  CD  GLU A  88      18.863 -12.478  36.621  1.00 39.61           C  
ATOM    721  OE1 GLU A  88      18.302 -12.828  37.675  1.00 39.23           O  
ATOM    722  OE2 GLU A  88      18.349 -11.664  35.833  1.00 40.49           O  
ATOM    723  N   LEU A  89      22.120 -10.478  39.559  1.00 34.24           N  
ATOM    724  CA  LEU A  89      22.969 -10.387  40.751  1.00 35.34           C  
ATOM    725  C   LEU A  89      22.458 -11.491  41.684  1.00 32.52           C  
ATOM    726  O   LEU A  89      21.251 -11.532  41.993  1.00 34.95           O  
ATOM    727  CB  LEU A  89      22.827  -9.008  41.435  1.00 38.15           C  
ATOM    728  CG  LEU A  89      23.854  -8.606  42.502  1.00 37.33           C  
ATOM    729  CD1 LEU A  89      23.801  -7.077  42.768  1.00 39.01           C  
ATOM    730  CD2 LEU A  89      23.656  -9.382  43.780  1.00 41.94           C  
ATOM    731  N   PHE A  90      23.335 -12.422  42.049  1.00 31.94           N  
ATOM    732  CA  PHE A  90      23.014 -13.501  43.004  1.00 33.73           C  
ATOM    733  C   PHE A  90      23.672 -13.211  44.368  1.00 35.29           C  
ATOM    734  O   PHE A  90      24.879 -13.015  44.432  1.00 34.73           O  
ATOM    735  CB  PHE A  90      23.493 -14.877  42.498  1.00 34.81           C  
ATOM    736  CG  PHE A  90      23.248 -15.124  41.018  1.00 35.66           C  
ATOM    737  CD1 PHE A  90      21.965 -15.414  40.535  1.00 34.65           C  
ATOM    738  CD2 PHE A  90      24.314 -15.120  40.126  1.00 34.55           C  
ATOM    739  CE1 PHE A  90      21.755 -15.640  39.164  1.00 36.51           C  
ATOM    740  CE2 PHE A  90      24.113 -15.351  38.756  1.00 36.48           C  
ATOM    741  CZ  PHE A  90      22.837 -15.619  38.282  1.00 36.44           C  
ATOM    742  N   VAL A  91      22.859 -13.200  45.430  1.00 34.79           N  
ATOM    743  CA  VAL A  91      23.313 -13.170  46.845  1.00 35.76           C  
ATOM    744  C   VAL A  91      23.016 -14.496  47.584  1.00 36.47           C  
ATOM    745  O   VAL A  91      21.899 -15.023  47.505  1.00 39.03           O  
ATOM    746  CB  VAL A  91      22.654 -11.973  47.614  1.00 34.13           C  
ATOM    747  CG1 VAL A  91      23.168 -11.879  49.084  1.00 35.26           C  
ATOM    748  CG2 VAL A  91      22.873 -10.653  46.883  1.00 37.89           C  
ATOM    749  N   LYS A  92      23.997 -15.019  48.319  1.00 36.56           N  
ATOM    750  CA  LYS A  92      23.831 -16.256  49.120  1.00 37.44           C  
ATOM    751  C   LYS A  92      22.660 -16.154  50.110  1.00 35.26           C  
ATOM    752  O   LYS A  92      22.529 -15.150  50.791  1.00 36.47           O  
ATOM    753  CB  LYS A  92      25.130 -16.597  49.862  1.00 38.77           C  
ATOM    754  CG  LYS A  92      25.088 -17.927  50.592  1.00 40.78           C  
ATOM    755  CD  LYS A  92      26.487 -18.521  50.721  1.00 42.70           C  
ATOM    756  CE  LYS A  92      26.449 -19.998  51.132  1.00 41.74           C  
ATOM    757  NZ  LYS A  92      26.208 -20.192  52.601  1.00 45.50           N  
ATOM    758  N   GLY A  93      21.777 -17.160  50.123  1.00 36.42           N  
ATOM    759  CA  GLY A  93      20.606 -17.179  51.033  1.00 36.36           C  
ATOM    760  C   GLY A  93      19.263 -16.766  50.424  1.00 38.09           C  
ATOM    761  O   GLY A  93      18.220 -16.904  51.083  1.00 36.29           O  
ATOM    762  N   VAL A  94      19.285 -16.260  49.184  1.00 36.66           N  
ATOM    763  CA  VAL A  94      18.071 -15.765  48.491  1.00 39.87           C  
ATOM    764  C   VAL A  94      17.387 -16.817  47.603  1.00 41.99           C  
ATOM    765  O   VAL A  94      16.278 -17.277  47.917  1.00 44.16           O  
ATOM    766  CB  VAL A  94      18.345 -14.488  47.625  1.00 37.95           C  
ATOM    767  CG1 VAL A  94      17.019 -13.957  46.989  1.00 35.29           C  
ATOM    768  CG2 VAL A  94      19.015 -13.397  48.447  1.00 38.02           C  
ATOM    769  N   ARG A  95      18.040 -17.166  46.495  1.00 41.30           N  
ATOM    770  CA  ARG A  95      17.544 -18.196  45.566  1.00 41.79           C  
ATOM    771  C   ARG A  95      17.952 -19.594  46.026  1.00 42.57           C  
ATOM    772  O   ARG A  95      19.003 -19.767  46.656  1.00 41.06           O  
ATOM    773  CB  ARG A  95      18.089 -17.965  44.143  1.00 42.48           C  
ATOM    774  CG  ARG A  95      17.859 -16.551  43.570  1.00 39.49           C  
ATOM    775  CD  ARG A  95      18.231 -16.424  42.104  1.00 40.50           C  
ATOM    776  NE  ARG A  95      18.541 -15.023  41.762  1.00 38.70           N  
ATOM    777  CZ  ARG A  95      18.485 -14.494  40.540  1.00 33.57           C  
ATOM    778  NH1 ARG A  95      18.136 -15.227  39.480  1.00 35.38           N  
ATOM    779  NH2 ARG A  95      18.804 -13.219  40.378  1.00 33.79           N  
ATOM    780  N   GLU A  96      17.147 -20.593  45.664  1.00 42.20           N  
ATOM    781  CA  GLU A  96      17.476 -21.999  45.934  1.00 43.36           C  
ATOM    782  C   GLU A  96      18.713 -22.411  45.126  1.00 44.61           C  
ATOM    783  O   GLU A  96      18.950 -21.914  44.019  1.00 43.88           O  
ATOM    784  CB  GLU A  96      16.280 -22.908  45.615  1.00 42.20           C  
ATOM    785  CG  GLU A  96      16.471 -24.379  45.977  1.00 45.58           C  
ATOM    786  CD  GLU A  96      15.163 -25.188  45.942  1.00 44.62           C  
ATOM    787  OE1 GLU A  96      14.382 -25.048  44.976  1.00 46.02           O  
ATOM    788  OE2 GLU A  96      14.921 -25.975  46.873  1.00 42.82           O  
ATOM    789  OXT GLU A  96      19.514 -23.238  45.568  1.00 45.69           O  
TER     790      GLU A  96                                                      
HETATM  791  O   HOH A2001      18.794   0.597  18.431  1.00 41.59           O  
HETATM  792  O   HOH A2002      25.483 -13.880  20.505  1.00 45.67           O  
HETATM  793  O   HOH A2003      33.842 -11.370  45.025  1.00 51.07           O  
HETATM  794  O   HOH A2004      33.622  -9.765  43.086  1.00 41.49           O  
HETATM  795  O   HOH A2005      28.975 -15.511  48.162  1.00 36.96           O  
HETATM  796  O   HOH A2006      29.188  -5.278  26.587  1.00 29.27           O  
HETATM  797  O   HOH A2007      28.393  -8.193  23.441  1.00 36.41           O  
HETATM  798  O   HOH A2008      28.178 -14.005  21.835  1.00 43.67           O  
HETATM  799  O   HOH A2009      34.267  -4.465  49.340  1.00 51.16           O  
HETATM  800  O   HOH A2010      32.745   0.632  47.894  1.00 51.33           O  
HETATM  801  O   HOH A2011      32.920  -8.702  47.717  1.00 44.71           O  
HETATM  802  O   HOH A2012      25.053 -12.173  29.206  1.00 45.59           O  
HETATM  803  O   HOH A2013      29.193  -8.152  35.705  1.00 28.12           O  
HETATM  804  O   HOH A2014      29.282  -7.151  32.407  1.00 38.44           O  
HETATM  805  O   HOH A2015      30.985 -10.287  36.836  1.00 40.57           O  
HETATM  806  O   HOH A2016      27.100  -5.317  20.519  1.00 43.94           O  
HETATM  807  O   HOH A2017      27.047  -3.589  16.211  1.00 50.49           O  
HETATM  808  O   HOH A2018      30.896 -12.342  40.423  1.00 28.35           O  
HETATM  809  O   HOH A2019      31.613 -12.215  44.905  1.00 48.11           O  
HETATM  810  O   HOH A2020      31.290  -9.979  42.047  1.00 35.81           O  
HETATM  811  O   HOH A2021      26.636 -13.968  48.530  1.00 28.14           O  
HETATM  812  O   HOH A2022      22.089   7.366  34.945  1.00 34.73           O  
HETATM  813  O   HOH A2023      18.045 -23.173  53.194  1.00 52.31           O  
HETATM  814  O   HOH A2024      29.801 -10.881  53.838  1.00 45.76           O  
HETATM  815  O   HOH A2025      31.987  -7.898  52.384  1.00 64.41           O  
HETATM  816  O   HOH A2026      27.843  -7.020  55.631  1.00 50.55           O  
HETATM  817  O   HOH A2027      26.764 -12.950  51.147  1.00 38.20           O  
HETATM  818  O   HOH A2028      14.314   1.644  47.565  1.00 48.40           O  
HETATM  819  O   HOH A2029      18.616   0.155  47.623  1.00 42.15           O  
HETATM  820  O   HOH A2030      11.891   7.219  39.366  1.00 35.95           O  
HETATM  821  O   HOH A2031      19.696  10.623  37.389  1.00 61.69           O  
HETATM  822  O   HOH A2032      33.203  -6.516  47.091  1.00 41.79           O  
HETATM  823  O   HOH A2033      33.729  -7.185  43.584  1.00 40.77           O  
HETATM  824  O   HOH A2034      30.690  -8.769  46.313  1.00 29.55           O  
HETATM  825  O   HOH A2035      33.055  -2.394  48.165  1.00 43.42           O  
HETATM  826  O   HOH A2036      20.068   1.644  50.404  1.00 52.52           O  
HETATM  827  O   HOH A2037      31.492  -7.614  40.159  1.00 32.30           O  
HETATM  828  O   HOH A2038      34.244   5.344  31.411  1.00 36.62           O  
HETATM  829  O   HOH A2039      29.977  -6.906  30.159  1.00 39.29           O  
HETATM  830  O   HOH A2040      29.021  -4.131  22.287  1.00 38.38           O  
HETATM  831  O   HOH A2041      36.812  -0.953  22.004  1.00 35.64           O  
HETATM  832  O   HOH A2042      20.682  -2.666  55.216  1.00 49.88           O  
HETATM  833  O   HOH A2043      33.060  -0.306  19.934  1.00 52.39           O  
HETATM  834  O   HOH A2044      33.014  -3.896  20.660  1.00 41.41           O  
HETATM  835  O   HOH A2045      17.791  -9.764  56.951  1.00 55.83           O  
HETATM  836  O   HOH A2046      22.780  -7.105  55.299  1.00 43.51           O  
HETATM  837  O   HOH A2047      14.246 -15.286  44.401  1.00 43.01           O  
HETATM  838  O   HOH A2048      24.688  -2.690  14.360  1.00 41.90           O  
HETATM  839  O   HOH A2049      29.900   5.320  17.569  1.00 42.33           O  
HETATM  840  O   HOH A2050      23.265  13.661  24.757  1.00 58.28           O  
HETATM  841  O   HOH A2051      27.824  12.767  17.571  1.00 44.29           O  
HETATM  842  O   HOH A2052      18.111  10.310  23.545  1.00 51.27           O  
HETATM  843  O   HOH A2053      22.747  -9.146  25.248  1.00 51.66           O  
HETATM  844  O   HOH A2054      14.025  -9.280  27.619  1.00 62.32           O  
HETATM  845  O   HOH A2055      25.741  11.296  24.870  1.00 36.16           O  
HETATM  846  O   HOH A2056      16.387 -19.813  52.812  1.00 53.75           O  
HETATM  847  O   HOH A2057      24.117   6.728  32.722  1.00 34.98           O  
HETATM  848  O   HOH A2058      23.454   9.027  29.850  1.00 37.86           O  
HETATM  849  O   HOH A2059      17.876   5.889  28.814  1.00 42.97           O  
HETATM  850  O   HOH A2060      11.524   4.839  32.969  1.00 36.88           O  
HETATM  851  O   HOH A2061      10.489   3.007  37.758  1.00 38.38           O  
HETATM  852  O   HOH A2062      15.933  -2.785  47.562  1.00 42.89           O  
HETATM  853  O   HOH A2063      15.866  -0.752  45.743  1.00 44.13           O  
HETATM  854  O   HOH A2064      13.894  -4.520  46.977  1.00 31.19           O  
HETATM  855  O   HOH A2065      10.955   4.887  35.470  1.00 40.62           O  
HETATM  856  O   HOH A2066      14.637   7.097  40.167  1.00 43.16           O  
HETATM  857  O   HOH A2067      11.588   4.263  39.487  1.00 36.67           O  
HETATM  858  O   HOH A2068      16.369   3.126  43.358  1.00 38.81           O  
HETATM  859  O   HOH A2069      17.982   8.094  36.759  1.00 34.23           O  
HETATM  860  O   HOH A2070      20.712   5.155  35.746  1.00 32.10           O  
HETATM  861  O   HOH A2071      18.528   5.070  42.795  1.00 31.95           O  
HETATM  862  O   HOH A2072      15.648   9.222  39.113  1.00 52.38           O  
HETATM  863  O   HOH A2073      16.562   7.560  43.698  1.00 54.41           O  
HETATM  864  O   HOH A2074      29.378   8.872  39.116  1.00 35.76           O  
HETATM  865  O   HOH A2075      21.408  11.738  41.547  1.00 56.24           O  
HETATM  866  O   HOH A2076      22.058  10.333  37.882  1.00 49.14           O  
HETATM  867  O   HOH A2077      19.570   5.445  45.063  1.00 38.92           O  
HETATM  868  O   HOH A2078      21.786  -1.071  50.927  1.00 35.46           O  
HETATM  869  O   HOH A2079      16.810   0.366  43.814  1.00 31.20           O  
HETATM  870  O   HOH A2080      20.380  -2.738  44.200  1.00 25.57           O  
HETATM  871  O   HOH A2081      35.523   5.952  41.217  1.00 35.48           O  
HETATM  872  O   HOH A2082      30.492   3.830  37.508  1.00 27.90           O  
HETATM  873  O   HOH A2083      32.020   7.999  39.584  1.00 38.44           O  
HETATM  874  O   HOH A2084      25.649   4.408  32.451  1.00 28.30           O  
HETATM  875  O   HOH A2085      31.608   4.789  32.173  1.00 30.58           O  
HETATM  876  O   HOH A2086      29.483   9.705  33.414  1.00 34.35           O  
HETATM  877  O   HOH A2087      27.706   8.924  23.369  1.00 33.12           O  
HETATM  878  O   HOH A2088      30.843  11.643  29.949  1.00 44.59           O  
HETATM  879  O   HOH A2089      27.278  10.621  31.169  1.00 38.21           O  
HETATM  880  O   HOH A2090      34.727   5.080  28.898  1.00 36.72           O  
HETATM  881  O   HOH A2091      31.213  11.140  32.268  1.00 45.75           O  
HETATM  882  O   HOH A2092      33.897   8.050  34.532  1.00 43.68           O  
HETATM  883  O   HOH A2093      33.407   9.956  22.250  1.00 42.18           O  
HETATM  884  O   HOH A2094      38.603   6.009  23.859  1.00 33.21           O  
HETATM  885  O   HOH A2095      36.670   5.419  27.009  1.00 40.77           O  
HETATM  886  O   HOH A2096      30.449  -1.611  49.344  1.00 35.01           O  
HETATM  887  O   HOH A2097      23.422  -1.959  53.322  1.00 54.27           O  
HETATM  888  O   HOH A2098      25.119   2.336  50.339  1.00 57.65           O  
HETATM  889  O   HOH A2099      30.449   1.602  50.028  1.00 48.92           O  
HETATM  890  O   HOH A2100      25.451  -4.071  53.704  1.00 40.35           O  
HETATM  891  O   HOH A2101      19.621  -2.910  50.710  1.00 35.02           O  
HETATM  892  O   HOH A2102      18.658  -5.648  54.497  1.00 51.24           O  
HETATM  893  O   HOH A2103      21.243  -8.889  53.760  1.00 43.57           O  
HETATM  894  O   HOH A2104      18.408 -12.319  56.308  1.00 38.40           O  
HETATM  895  O   HOH A2105      14.507  -6.681  45.441  1.00 29.66           O  
HETATM  896  O   HOH A2106      18.657  -2.496  48.134  1.00 31.28           O  
HETATM  897  O   HOH A2107      15.670 -12.902  43.236  1.00 31.07           O  
HETATM  898  O   HOH A2108      14.789  -8.222  42.991  1.00 30.08           O  
HETATM  899  O   HOH A2109      15.468  -4.767  35.468  1.00 51.17           O  
HETATM  900  O   HOH A2110      15.563 -12.366  38.656  1.00 51.15           O  
HETATM  901  O   HOH A2111      14.359  -9.127  39.755  1.00 46.11           O  
HETATM  902  O   HOH A2112      12.589  -2.380  33.304  1.00 39.69           O  
HETATM  903  O   HOH A2113       9.648  -1.836  28.092  1.00 52.58           O  
HETATM  904  O   HOH A2114      11.613   1.426  29.833  1.00 62.02           O  
HETATM  905  O   HOH A2115      14.221   1.119  18.815  1.00 43.92           O  
HETATM  906  O   HOH A2116      13.232   4.748  21.611  1.00 56.04           O  
HETATM  907  O   HOH A2117      11.134   3.765  25.696  1.00 54.50           O  
HETATM  908  O   HOH A2118      14.875  -1.197  25.339  1.00 39.96           O  
HETATM  909  O   HOH A2119      20.848  -5.828  23.469  1.00 41.17           O  
HETATM  910  O   HOH A2120      23.243  -9.067  28.400  1.00 32.44           O  
HETATM  911  O   HOH A2121      14.191  -5.459  26.228  1.00 47.63           O  
HETATM  912  O   HOH A2122      11.786  -5.653  29.824  1.00 57.59           O  
HETATM  913  O   HOH A2123      21.307 -12.092  30.782  1.00 47.26           O  
HETATM  914  O   HOH A2124      20.441  -9.118  27.567  1.00 32.50           O  
HETATM  915  O   HOH A2125      19.158 -11.342  32.998  1.00 45.63           O  
HETATM  916  O   HOH A2126      20.563 -16.136  45.556  1.00 37.09           O  
HETATM  917  O   HOH A2127      24.243 -13.806  52.269  1.00 35.02           O  
HETATM  918  O   HOH A2128      18.404 -19.912  50.087  1.00 50.39           O  
HETATM  919  O   HOH A2129      21.391 -19.114  47.533  1.00 47.53           O  
MASTER      318    0    0    1    9    0    0    6  905    1    0    8          
END                                                                             
