# Supplementary material
Source: publisher figshare collection journal article supplement (https://plos.figshare.com/articles/dataset/_/11411415)
Supplement: Supplementary file 1 [file 1 › pone.0226693.s014.pdb]

HEADER    TRANSFERASE                             15-AUG-18   6HCI              
TITLE     CRYSTAL STRUCTURE OF TITIN M3 DOMAIN                                  
COMPND    MOL_ID: 1;                                                            
COMPND   2 MOLECULE: TITIN;                                                     
COMPND   3 CHAIN: A, B, C, D;                                                   
COMPND   4 SYNONYM: CONNECTIN,RHABDOMYOSARCOMA ANTIGEN MU-RMS-40.14;            
COMPND   5 EC: 2.7.11.1;                                                        
COMPND   6 ENGINEERED: YES                                                      
SOURCE    MOL_ID: 1;                                                            
SOURCE   2 ORGANISM_SCIENTIFIC: HOMO SAPIENS;                                   
SOURCE   3 ORGANISM_COMMON: HUMAN;                                              
SOURCE   4 ORGANISM_TAXID: 9606;                                                
SOURCE   5 GENE: TTN;                                                           
SOURCE   6 EXPRESSION_SYSTEM: ESCHERICHIA COLI;                                 
SOURCE   7 EXPRESSION_SYSTEM_TAXID: 562                                         
KEYWDS    TITIN, IG DOMAINS, SARCOMERE, M-BAND, TRANSFERASE                     
EXPDTA    X-RAY DIFFRACTION                                                     
AUTHOR    S.D.CHATZIEFTHIMIOU,D.UGURLAR,M.WILMANNS                              
JRNL        AUTH   F.SAUER,S.D.CHATZIEFTHIMIOU,S.MUELLER,D.UGURLAR,P.HORNBURG,  
JRNL        AUTH 2 M.WILMANNS                                                   
JRNL        TITL   STRUCTURAL DIVERSITY IN THE ATOMIC RESOLUTION 3D FINGERPRINT 
JRNL        TITL 2 OF TITIN M-BAND DOMAINS                                      
JRNL        REF    TO BE PUBLISHED                                              
JRNL        REFN                                                                
REMARK   2                                                                      
REMARK   2 RESOLUTION.    2.12 ANGSTROMS.                                       
REMARK   3                                                                      
REMARK   3 REFINEMENT.                                                          
REMARK   3   PROGRAM     : PHENIX (1.13_2998: ???)                              
REMARK   3   AUTHORS     : PAUL ADAMS,PAVEL AFONINE,VINCENT CHEN,IAN            
REMARK   3               : DAVIS,KRESHNA GOPAL,RALF GROSSE-KUNSTLEVE,           
REMARK   3               : LI-WEI HUNG,ROBERT IMMORMINO,TOM IOERGER,            
REMARK   3               : AIRLIE MCCOY,ERIK MCKEE,NIGEL MORIARTY,              
REMARK   3               : REETAL PAI,RANDY READ,JANE RICHARDSON,               
REMARK   3               : DAVID RICHARDSON,TOD ROMO,JIM SACCHETTINI,           
REMARK   3               : NICHOLAS SAUTER,JACOB SMITH,LAURENT                  
REMARK   3               : STORONI,TOM TERWILLIGER,PETER ZWART                  
REMARK   3                                                                      
REMARK   3    REFINEMENT TARGET : NULL                                          
REMARK   3                                                                      
REMARK   3  DATA USED IN REFINEMENT.                                            
REMARK   3   RESOLUTION RANGE HIGH (ANGSTROMS) : 2.12                           
REMARK   3   RESOLUTION RANGE LOW  (ANGSTROMS) : 39.23                          
REMARK   3   MIN(FOBS/SIGMA_FOBS)              : 1.350                          
REMARK   3   COMPLETENESS FOR RANGE        (%) : 97.5                           
REMARK   3   NUMBER OF REFLECTIONS             : 27423                          
REMARK   3                                                                      
REMARK   3  FIT TO DATA USED IN REFINEMENT.                                     
REMARK   3   R VALUE     (WORKING + TEST SET) : 0.194                           
REMARK   3   R VALUE            (WORKING SET) : 0.192                           
REMARK   3   FREE R VALUE                     : 0.245                           
REMARK   3   FREE R VALUE TEST SET SIZE   (%) : 4.800                           
REMARK   3   FREE R VALUE TEST SET COUNT      : 1317                            
REMARK   3                                                                      
REMARK   3  FIT TO DATA USED IN REFINEMENT (IN BINS).                           
REMARK   3   BIN  RESOLUTION RANGE  COMPL.    NWORK NFREE   RWORK  RFREE        
REMARK   3     1 39.2408 -  4.4080    1.00     3089   162  0.1885 0.2375        
REMARK   3     2  4.4080 -  3.4995    1.00     3014   140  0.1588 0.1822        
REMARK   3     3  3.4995 -  3.0573    1.00     2972   169  0.1710 0.2329        
REMARK   3     4  3.0573 -  2.7779    1.00     2925   175  0.2006 0.2539        
REMARK   3     5  2.7779 -  2.5788    1.00     2973   148  0.2164 0.3151        
REMARK   3     6  2.5788 -  2.4268    1.00     2947   141  0.2155 0.2815        
REMARK   3     7  2.4268 -  2.3053    1.00     2961   123  0.2228 0.3137        
REMARK   3     8  2.3053 -  2.2049    0.94     2763   129  0.2407 0.3127        
REMARK   3     9  2.2049 -  2.1200    0.84     2462   130  0.2681 0.2958        
REMARK   3                                                                      
REMARK   3  BULK SOLVENT MODELLING.                                             
REMARK   3   METHOD USED        : NULL                                          
REMARK   3   SOLVENT RADIUS     : 1.11                                          
REMARK   3   SHRINKAGE RADIUS   : 0.90                                          
REMARK   3   K_SOL              : NULL                                          
REMARK   3   B_SOL              : NULL                                          
REMARK   3                                                                      
REMARK   3  ERROR ESTIMATES.                                                    
REMARK   3   COORDINATE ERROR (MAXIMUM-LIKELIHOOD BASED)     : 0.240            
REMARK   3   PHASE ERROR (DEGREES, MAXIMUM-LIKELIHOOD BASED) : 25.050           
REMARK   3                                                                      
REMARK   3  B VALUES.                                                           
REMARK   3   FROM WILSON PLOT           (A**2) : 30.54                          
REMARK   3   MEAN B VALUE      (OVERALL, A**2) : 39.40                          
REMARK   3   OVERALL ANISOTROPIC B VALUE.                                       
REMARK   3    B11 (A**2) : NULL                                                 
REMARK   3    B22 (A**2) : NULL                                                 
REMARK   3    B33 (A**2) : NULL                                                 
REMARK   3    B12 (A**2) : NULL                                                 
REMARK   3    B13 (A**2) : NULL                                                 
REMARK   3    B23 (A**2) : NULL                                                 
REMARK   3                                                                      
REMARK   3  TWINNING INFORMATION.                                               
REMARK   3   FRACTION: NULL                                                     
REMARK   3   OPERATOR: NULL                                                     
REMARK   3                                                                      
REMARK   3  DEVIATIONS FROM IDEAL VALUES.                                       
REMARK   3                 RMSD          COUNT                                  
REMARK   3   BOND      :  0.004           3237                                  
REMARK   3   ANGLE     :  0.691           4418                                  
REMARK   3   CHIRALITY :  0.045            487                                  
REMARK   3   PLANARITY :  0.004            577                                  
REMARK   3   DIHEDRAL  :  4.343           2492                                  
REMARK   3                                                                      
REMARK   3  TLS DETAILS                                                         
REMARK   3   NUMBER OF TLS GROUPS  : 4                                          
REMARK   3   TLS GROUP : 1                                                      
REMARK   3    SELECTION: (CHAIN A AND RESID 8:104)                              
REMARK   3    ORIGIN FOR THE GROUP (A):  73.1726 -22.2102  -5.2069              
REMARK   3    T TENSOR                                                          
REMARK   3      T11:   0.1779 T22:   0.1922                                     
REMARK   3      T33:   0.1319 T12:   0.0312                                     
REMARK   3      T13:   0.0113 T23:   0.0217                                     
REMARK   3    L TENSOR                                                          
REMARK   3      L11:   5.3266 L22:   3.9266                                     
REMARK   3      L33:   2.3142 L12:   1.7247                                     
REMARK   3      L13:   0.4084 L23:   0.1379                                     
REMARK   3    S TENSOR                                                          
REMARK   3      S11:  -0.0053 S12:   0.1645 S13:   0.2361                       
REMARK   3      S21:  -0.0633 S22:   0.0033 S23:  -0.0881                       
REMARK   3      S31:  -0.0809 S32:   0.0662 S33:   0.0241                       
REMARK   3   TLS GROUP : 2                                                      
REMARK   3    SELECTION: (CHAIN B AND RESID 7:105)                              
REMARK   3    ORIGIN FOR THE GROUP (A):  44.6577 -29.3123  -2.6180              
REMARK   3    T TENSOR                                                          
REMARK   3      T11:   0.2087 T22:   0.2205                                     
REMARK   3      T33:   0.1524 T12:  -0.0037                                     
REMARK   3      T13:   0.0247 T23:   0.0379                                     
REMARK   3    L TENSOR                                                          
REMARK   3      L11:   4.4741 L22:   1.3901                                     
REMARK   3      L33:   1.7039 L12:  -0.7690                                     
REMARK   3      L13:   1.8085 L23:  -0.3316                                     
REMARK   3    S TENSOR                                                          
REMARK   3      S11:  -0.0750 S12:  -0.2863 S13:  -0.3180                       
REMARK   3      S21:  -0.0105 S22:   0.1786 S23:   0.1167                       
REMARK   3      S31:  -0.0668 S32:  -0.3268 S33:  -0.0925                       
REMARK   3   TLS GROUP : 3                                                      
REMARK   3    SELECTION: (CHAIN C AND RESID 8:103)                              
REMARK   3    ORIGIN FOR THE GROUP (A):  39.1801  -7.8892  -6.3501              
REMARK   3    T TENSOR                                                          
REMARK   3      T11:   0.2381 T22:   0.1381                                     
REMARK   3      T33:   0.2147 T12:   0.0235                                     
REMARK   3      T13:   0.0207 T23:  -0.0061                                     
REMARK   3    L TENSOR                                                          
REMARK   3      L11:   4.5148 L22:   3.8149                                     
REMARK   3      L33:   2.5105 L12:   0.6681                                     
REMARK   3      L13:  -0.0913 L23:  -0.0263                                     
REMARK   3    S TENSOR                                                          
REMARK   3      S11:   0.0234 S12:  -0.2552 S13:  -0.0049                       
REMARK   3      S21:   0.3348 S22:   0.0436 S23:   0.4114                       
REMARK   3      S31:   0.0872 S32:   0.0319 S33:  -0.0782                       
REMARK   3   TLS GROUP : 4                                                      
REMARK   3    SELECTION: (CHAIN D AND RESID 8:104)                              
REMARK   3    ORIGIN FOR THE GROUP (A):  67.4181  -2.4142 -12.1400              
REMARK   3    T TENSOR                                                          
REMARK   3      T11:   0.2580 T22:   0.2317                                     
REMARK   3      T33:   0.3626 T12:  -0.0158                                     
REMARK   3      T13:  -0.0777 T23:   0.0429                                     
REMARK   3    L TENSOR                                                          
REMARK   3      L11:   5.8637 L22:   3.4838                                     
REMARK   3      L33:   2.6932 L12:  -1.6146                                     
REMARK   3      L13:  -1.3310 L23:  -0.2744                                     
REMARK   3    S TENSOR                                                          
REMARK   3      S11:   0.0375 S12:   0.0079 S13:   0.5723                       
REMARK   3      S21:   0.0043 S22:  -0.1033 S23:  -0.7074                       
REMARK   3      S31:  -0.1074 S32:   0.3954 S33:   0.0800                       
REMARK   3                                                                      
REMARK   3  NCS DETAILS                                                         
REMARK   3   NUMBER OF NCS GROUPS : NULL                                        
REMARK   3                                                                      
REMARK   3  OTHER REFINEMENT REMARKS: NULL                                      
REMARK   4                                                                      
REMARK   4 6HCI COMPLIES WITH FORMAT V. 3.30, 13-JUL-11                         
REMARK 100                                                                      
REMARK 100 THIS ENTRY HAS BEEN PROCESSED BY PDBE ON 15-AUG-18.                  
REMARK 100 THE DEPOSITION ID IS D_1200010926.                                   
REMARK 200                                                                      
REMARK 200 EXPERIMENTAL DETAILS                                                 
REMARK 200  EXPERIMENT TYPE                : X-RAY DIFFRACTION                  
REMARK 200  DATE OF DATA COLLECTION        : 11-JUN-11                          
REMARK 200  TEMPERATURE           (KELVIN) : 100                                
REMARK 200  PH                             : 8                                  
REMARK 200  NUMBER OF CRYSTALS USED        : 1                                  
REMARK 200                                                                      
REMARK 200  SYNCHROTRON              (Y/N) : Y                                  
REMARK 200  RADIATION SOURCE               : ESRF                               
REMARK 200  BEAMLINE                       : ID23-1                             
REMARK 200  X-RAY GENERATOR MODEL          : NULL                               
REMARK 200  MONOCHROMATIC OR LAUE    (M/L) : M                                  
REMARK 200  WAVELENGTH OR RANGE        (A) : 0.99188                            
REMARK 200  MONOCHROMATOR                  : NULL                               
REMARK 200  OPTICS                         : NULL                               
REMARK 200                                                                      
REMARK 200  DETECTOR TYPE                  : CCD                                
REMARK 200  DETECTOR MANUFACTURER          : ADSC QUANTUM 315R                  
REMARK 200  INTENSITY-INTEGRATION SOFTWARE : XDS                                
REMARK 200  DATA SCALING SOFTWARE          : AIMLESS                            
REMARK 200                                                                      
REMARK 200  NUMBER OF UNIQUE REFLECTIONS   : 27434                              
REMARK 200  RESOLUTION RANGE HIGH      (A) : 2.120                              
REMARK 200  RESOLUTION RANGE LOW       (A) : 39.234                             
REMARK 200  REJECTION CRITERIA  (SIGMA(I)) : NULL                               
REMARK 200                                                                      
REMARK 200 OVERALL.                                                             
REMARK 200  COMPLETENESS FOR RANGE     (%) : 97.5                               
REMARK 200  DATA REDUNDANCY                : 4.900                              
REMARK 200  R MERGE                    (I) : 0.11950                            
REMARK 200  R SYM                      (I) : NULL                               
REMARK 200  <I/SIGMA(I)> FOR THE DATA SET  : 10.0000                            
REMARK 200                                                                      
REMARK 200 IN THE HIGHEST RESOLUTION SHELL.                                     
REMARK 200  HIGHEST RESOLUTION SHELL, RANGE HIGH (A) : 2.12                     
REMARK 200  HIGHEST RESOLUTION SHELL, RANGE LOW  (A) : 2.20                     
REMARK 200  COMPLETENESS FOR SHELL     (%) : 83.7                               
REMARK 200  DATA REDUNDANCY IN SHELL       : 3.50                               
REMARK 200  R MERGE FOR SHELL          (I) : 0.88800                            
REMARK 200  R SYM FOR SHELL            (I) : NULL                               
REMARK 200  <I/SIGMA(I)> FOR SHELL         : 1.300                              
REMARK 200                                                                      
REMARK 200 DIFFRACTION PROTOCOL: SINGLE WAVELENGTH                              
REMARK 200 METHOD USED TO DETERMINE THE STRUCTURE: MOLECULAR REPLACEMENT        
REMARK 200 SOFTWARE USED: PHASER                                                
REMARK 200 STARTING MODEL: TELOKIN                                              
REMARK 200                                                                      
REMARK 200 REMARK: NULL                                                         
REMARK 280                                                                      
REMARK 280 CRYSTAL                                                              
REMARK 280 SOLVENT CONTENT, VS   (%): 52.74                                     
REMARK 280 MATTHEWS COEFFICIENT, VM (ANGSTROMS**3/DA): 2.60                     
REMARK 280                                                                      
REMARK 280 CRYSTALLIZATION CONDITIONS: 0.2 M AMMONIUM SULFATE 23% W/V           
REMARK 280  POLYETHYLENE GLYCOL 4000, PH 8, VAPOR DIFFUSION, HANGING DROP,      
REMARK 280  TEMPERATURE 293K                                                    
REMARK 290                                                                      
REMARK 290 CRYSTALLOGRAPHIC SYMMETRY                                            
REMARK 290 SYMMETRY OPERATORS FOR SPACE GROUP: P 32 2 1                         
REMARK 290                                                                      
REMARK 290      SYMOP   SYMMETRY                                                
REMARK 290     NNNMMM   OPERATOR                                                
REMARK 290       1555   X,Y,Z                                                   
REMARK 290       2555   -Y,X-Y,Z+2/3                                            
REMARK 290       3555   -X+Y,-X,Z+1/3                                           
REMARK 290       4555   Y,X,-Z                                                  
REMARK 290       5555   X-Y,-Y,-Z+1/3                                           
REMARK 290       6555   -X,-X+Y,-Z+2/3                                          
REMARK 290                                                                      
REMARK 290     WHERE NNN -> OPERATOR NUMBER                                     
REMARK 290           MMM -> TRANSLATION VECTOR                                  
REMARK 290                                                                      
REMARK 290 CRYSTALLOGRAPHIC SYMMETRY TRANSFORMATIONS                            
REMARK 290 THE FOLLOWING TRANSFORMATIONS OPERATE ON THE ATOM/HETATM             
REMARK 290 RECORDS IN THIS ENTRY TO PRODUCE CRYSTALLOGRAPHICALLY                
REMARK 290 RELATED MOLECULES.                                                   
REMARK 290   SMTRY1   1  1.000000  0.000000  0.000000        0.00000            
REMARK 290   SMTRY2   1  0.000000  1.000000  0.000000        0.00000            
REMARK 290   SMTRY3   1  0.000000  0.000000  1.000000        0.00000            
REMARK 290   SMTRY1   2 -0.500000 -0.866025  0.000000        0.00000            
REMARK 290   SMTRY2   2  0.866025 -0.500000  0.000000        0.00000            
REMARK 290   SMTRY3   2  0.000000  0.000000  1.000000       50.32067            
REMARK 290   SMTRY1   3 -0.500000  0.866025  0.000000        0.00000            
REMARK 290   SMTRY2   3 -0.866025 -0.500000  0.000000        0.00000            
REMARK 290   SMTRY3   3  0.000000  0.000000  1.000000       25.16033            
REMARK 290   SMTRY1   4 -0.500000  0.866025  0.000000        0.00000            
REMARK 290   SMTRY2   4  0.866025  0.500000  0.000000        0.00000            
REMARK 290   SMTRY3   4  0.000000  0.000000 -1.000000        0.00000            
REMARK 290   SMTRY1   5  1.000000  0.000000  0.000000        0.00000            
REMARK 290   SMTRY2   5  0.000000 -1.000000  0.000000        0.00000            
REMARK 290   SMTRY3   5  0.000000  0.000000 -1.000000       25.16033            
REMARK 290   SMTRY1   6 -0.500000 -0.866025  0.000000        0.00000            
REMARK 290   SMTRY2   6 -0.866025  0.500000  0.000000        0.00000            
REMARK 290   SMTRY3   6  0.000000  0.000000 -1.000000       50.32067            
REMARK 290                                                                      
REMARK 290 REMARK: NULL                                                         
REMARK 300                                                                      
REMARK 300 BIOMOLECULE: 1                                                       
REMARK 300 SEE REMARK 350 FOR THE AUTHOR PROVIDED AND/OR PROGRAM                
REMARK 300 GENERATED ASSEMBLY INFORMATION FOR THE STRUCTURE IN                  
REMARK 300 THIS ENTRY. THE REMARK MAY ALSO PROVIDE INFORMATION ON               
REMARK 300 BURIED SURFACE AREA.                                                 
REMARK 350                                                                      
REMARK 350 COORDINATES FOR A COMPLETE MULTIMER REPRESENTING THE KNOWN           
REMARK 350 BIOLOGICALLY SIGNIFICANT OLIGOMERIZATION STATE OF THE                
REMARK 350 MOLECULE CAN BE GENERATED BY APPLYING BIOMT TRANSFORMATIONS          
REMARK 350 GIVEN BELOW.  BOTH NON-CRYSTALLOGRAPHIC AND                          
REMARK 350 CRYSTALLOGRAPHIC OPERATIONS ARE GIVEN.                               
REMARK 350                                                                      
REMARK 350 BIOMOLECULE: 1                                                       
REMARK 350 AUTHOR DETERMINED BIOLOGICAL UNIT: TETRAMERIC                        
REMARK 350 SOFTWARE DETERMINED QUATERNARY STRUCTURE: TETRAMERIC                 
REMARK 350 SOFTWARE USED: PISA                                                  
REMARK 350 TOTAL BURIED SURFACE AREA: 4230 ANGSTROM**2                          
REMARK 350 SURFACE AREA OF THE COMPLEX: 20830 ANGSTROM**2                       
REMARK 350 CHANGE IN SOLVENT FREE ENERGY: -70.0 KCAL/MOL                        
REMARK 350 APPLY THE FOLLOWING TO CHAINS: A, B, C, D                            
REMARK 350   BIOMT1   1  1.000000  0.000000  0.000000        0.00000            
REMARK 350   BIOMT2   1  0.000000  1.000000  0.000000        0.00000            
REMARK 350   BIOMT3   1  0.000000  0.000000  1.000000        0.00000            
REMARK 465                                                                      
REMARK 465 MISSING RESIDUES                                                     
REMARK 465 THE FOLLOWING RESIDUES WERE NOT LOCATED IN THE                       
REMARK 465 EXPERIMENT. (M=MODEL NUMBER; RES=RESIDUE NAME; C=CHAIN               
REMARK 465 IDENTIFIER; SSSEQ=SEQUENCE NUMBER; I=INSERTION CODE.)                
REMARK 465                                                                      
REMARK 465   M RES C SSSEQI                                                     
REMARK 465     HIS A     1                                                      
REMARK 465     PRO A     2                                                      
REMARK 465     PRO A     3                                                      
REMARK 465     PRO A     4                                                      
REMARK 465     THR A     5                                                      
REMARK 465     ASP A     6                                                      
REMARK 465     SER A     7                                                      
REMARK 465     ARG A   105                                                      
REMARK 465     HIS B     1                                                      
REMARK 465     PRO B     2                                                      
REMARK 465     PRO B     3                                                      
REMARK 465     PRO B     4                                                      
REMARK 465     THR B     5                                                      
REMARK 465     ASP B     6                                                      
REMARK 465     HIS C     1                                                      
REMARK 465     PRO C     2                                                      
REMARK 465     PRO C     3                                                      
REMARK 465     PRO C     4                                                      
REMARK 465     THR C     5                                                      
REMARK 465     ASP C     6                                                      
REMARK 465     SER C     7                                                      
REMARK 465     LEU C   104                                                      
REMARK 465     ARG C   105                                                      
REMARK 465     HIS D     1                                                      
REMARK 465     PRO D     2                                                      
REMARK 465     PRO D     3                                                      
REMARK 465     PRO D     4                                                      
REMARK 465     THR D     5                                                      
REMARK 465     ASP D     6                                                      
REMARK 465     SER D     7                                                      
REMARK 465     ARG D   105                                                      
REMARK 800                                                                      
REMARK 800 SITE                                                                 
REMARK 800 SITE_IDENTIFIER: AC1                                                 
REMARK 800 EVIDENCE_CODE: SOFTWARE                                              
REMARK 800 SITE_DESCRIPTION: binding site for residue SO4 A 201                 
REMARK 800                                                                      
REMARK 800 SITE_IDENTIFIER: AC2                                                 
REMARK 800 EVIDENCE_CODE: SOFTWARE                                              
REMARK 800 SITE_DESCRIPTION: binding site for residue SO4 A 202                 
REMARK 800                                                                      
REMARK 800 SITE_IDENTIFIER: AC3                                                 
REMARK 800 EVIDENCE_CODE: SOFTWARE                                              
REMARK 800 SITE_DESCRIPTION: binding site for residue SO4 A 203                 
REMARK 800                                                                      
REMARK 800 SITE_IDENTIFIER: AC4                                                 
REMARK 800 EVIDENCE_CODE: SOFTWARE                                              
REMARK 800 SITE_DESCRIPTION: binding site for residue SO4 A 204                 
REMARK 800                                                                      
REMARK 800 SITE_IDENTIFIER: AC5                                                 
REMARK 800 EVIDENCE_CODE: SOFTWARE                                              
REMARK 800 SITE_DESCRIPTION: binding site for residue SO4 B 201                 
REMARK 800                                                                      
REMARK 800 SITE_IDENTIFIER: AC6                                                 
REMARK 800 EVIDENCE_CODE: SOFTWARE                                              
REMARK 800 SITE_DESCRIPTION: binding site for residue SO4 B 202                 
REMARK 800                                                                      
REMARK 800 SITE_IDENTIFIER: AC7                                                 
REMARK 800 EVIDENCE_CODE: SOFTWARE                                              
REMARK 800 SITE_DESCRIPTION: binding site for residue SO4 B 203                 
REMARK 800                                                                      
REMARK 800 SITE_IDENTIFIER: AC8                                                 
REMARK 800 EVIDENCE_CODE: SOFTWARE                                              
REMARK 800 SITE_DESCRIPTION: binding site for residue SO4 C 201                 
DBREF  6HCI A    1   105  UNP    Q8WZ42   TITIN_HUMAN  32712  32816             
DBREF  6HCI B    1   105  UNP    Q8WZ42   TITIN_HUMAN  32712  32816             
DBREF  6HCI C    1   105  UNP    Q8WZ42   TITIN_HUMAN  32712  32816             
DBREF  6HCI D    1   105  UNP    Q8WZ42   TITIN_HUMAN  32712  32816             
SEQRES   1 A  105  HIS PRO PRO PRO THR ASP SER THR LEU ARG PRO MET PHE          
SEQRES   2 A  105  LYS ARG LEU LEU ALA ASN ALA GLU CYS GLN GLU GLY GLN          
SEQRES   3 A  105  SER VAL CYS PHE GLU ILE ARG VAL SER GLY ILE PRO PRO          
SEQRES   4 A  105  PRO THR LEU LYS TRP GLU LYS ASP GLY GLN PRO LEU SER          
SEQRES   5 A  105  LEU GLY PRO ASN ILE GLU ILE ILE HIS GLU GLY LEU ASP          
SEQRES   6 A  105  TYR TYR ALA LEU HIS ILE ARG ASP THR LEU PRO GLU ASP          
SEQRES   7 A  105  THR GLY TYR TYR ARG VAL THR ALA THR ASN THR ALA GLY          
SEQRES   8 A  105  SER THR SER CYS GLN ALA HIS LEU GLN VAL GLU ARG LEU          
SEQRES   9 A  105  ARG                                                          
SEQRES   1 B  105  HIS PRO PRO PRO THR ASP SER THR LEU ARG PRO MET PHE          
SEQRES   2 B  105  LYS ARG LEU LEU ALA ASN ALA GLU CYS GLN GLU GLY GLN          
SEQRES   3 B  105  SER VAL CYS PHE GLU ILE ARG VAL SER GLY ILE PRO PRO          
SEQRES   4 B  105  PRO THR LEU LYS TRP GLU LYS ASP GLY GLN PRO LEU SER          
SEQRES   5 B  105  LEU GLY PRO ASN ILE GLU ILE ILE HIS GLU GLY LEU ASP          
SEQRES   6 B  105  TYR TYR ALA LEU HIS ILE ARG ASP THR LEU PRO GLU ASP          
SEQRES   7 B  105  THR GLY TYR TYR ARG VAL THR ALA THR ASN THR ALA GLY          
SEQRES   8 B  105  SER THR SER CYS GLN ALA HIS LEU GLN VAL GLU ARG LEU          
SEQRES   9 B  105  ARG                                                          
SEQRES   1 C  105  HIS PRO PRO PRO THR ASP SER THR LEU ARG PRO MET PHE          
SEQRES   2 C  105  LYS ARG LEU LEU ALA ASN ALA GLU CYS GLN GLU GLY GLN          
SEQRES   3 C  105  SER VAL CYS PHE GLU ILE ARG VAL SER GLY ILE PRO PRO          
SEQRES   4 C  105  PRO THR LEU LYS TRP GLU LYS ASP GLY GLN PRO LEU SER          
SEQRES   5 C  105  LEU GLY PRO ASN ILE GLU ILE ILE HIS GLU GLY LEU ASP          
SEQRES   6 C  105  TYR TYR ALA LEU HIS ILE ARG ASP THR LEU PRO GLU ASP          
SEQRES   7 C  105  THR GLY TYR TYR ARG VAL THR ALA THR ASN THR ALA GLY          
SEQRES   8 C  105  SER THR SER CYS GLN ALA HIS LEU GLN VAL GLU ARG LEU          
SEQRES   9 C  105  ARG                                                          
SEQRES   1 D  105  HIS PRO PRO PRO THR ASP SER THR LEU ARG PRO MET PHE          
SEQRES   2 D  105  LYS ARG LEU LEU ALA ASN ALA GLU CYS GLN GLU GLY GLN          
SEQRES   3 D  105  SER VAL CYS PHE GLU ILE ARG VAL SER GLY ILE PRO PRO          
SEQRES   4 D  105  PRO THR LEU LYS TRP GLU LYS ASP GLY GLN PRO LEU SER          
SEQRES   5 D  105  LEU GLY PRO ASN ILE GLU ILE ILE HIS GLU GLY LEU ASP          
SEQRES   6 D  105  TYR TYR ALA LEU HIS ILE ARG ASP THR LEU PRO GLU ASP          
SEQRES   7 D  105  THR GLY TYR TYR ARG VAL THR ALA THR ASN THR ALA GLY          
SEQRES   8 D  105  SER THR SER CYS GLN ALA HIS LEU GLN VAL GLU ARG LEU          
SEQRES   9 D  105  ARG                                                          
HET    SO4  A 201       5                                                       
HET    SO4  A 202       5                                                       
HET    SO4  A 203       5                                                       
HET    SO4  A 204       5                                                       
HET    SO4  B 201       5                                                       
HET    SO4  B 202       5                                                       
HET    SO4  B 203       5                                                       
HET    SO4  C 201       5                                                       
HETNAM     SO4 SULFATE ION                                                      
FORMUL   5  SO4    8(O4 S 2-)                                                   
FORMUL  13  HOH   *188(H2 O)                                                    
HELIX    1 AA1 LEU A   75  THR A   79  5                                   5    
HELIX    2 AA2 LEU B   75  THR B   79  5                                   5    
HELIX    3 AA3 LEU C   75  THR C   79  5                                   5    
HELIX    4 AA4 LEU D   75  THR D   79  5                                   5    
SHEET    1 AA1 8 LEU A   9  ARG A  15  0                                        
SHEET    2 AA1 8 VAL A  28  ILE A  37 -1  O  ARG A  33   N  LYS A  14           
SHEET    3 AA1 8 TYR A  66  ILE A  71 -1  O  LEU A  69   N  PHE A  30           
SHEET    4 AA1 8 ILE A  57  GLU A  62 -1  N  ILE A  60   O  ALA A  68           
SHEET    5 AA1 8 ILE D  57  GLU D  62 -1  O  HIS D  61   N  ILE A  59           
SHEET    6 AA1 8 TYR D  66  ILE D  71 -1  O  HIS D  70   N  GLU D  58           
SHEET    7 AA1 8 VAL D  28  ILE D  37 -1  N  PHE D  30   O  LEU D  69           
SHEET    8 AA1 8 LEU D   9  ARG D  15 -1  N  LYS D  14   O  ARG D  33           
SHEET    1 AA2 5 ALA A  20  GLN A  23  0                                        
SHEET    2 AA2 5 GLY A  91  GLU A 102  1  O  GLU A 102   N  CYS A  22           
SHEET    3 AA2 5 GLY A  80  ASN A  88 -1  N  TYR A  82   O  ALA A  97           
SHEET    4 AA2 5 THR A  41  LYS A  46 -1  N  GLU A  45   O  ARG A  83           
SHEET    5 AA2 5 GLN A  49  PRO A  50 -1  O  GLN A  49   N  LYS A  46           
SHEET    1 AA3 8 LEU B   9  ARG B  15  0                                        
SHEET    2 AA3 8 VAL B  28  ILE B  37 -1  O  ILE B  37   N  LEU B   9           
SHEET    3 AA3 8 TYR B  66  ILE B  71 -1  O  LEU B  69   N  PHE B  30           
SHEET    4 AA3 8 ILE B  57  GLU B  62 -1  N  GLU B  58   O  HIS B  70           
SHEET    5 AA3 8 ILE C  57  GLU C  62 -1  O  ILE C  59   N  HIS B  61           
SHEET    6 AA3 8 TYR C  66  ILE C  71 -1  O  ALA C  68   N  ILE C  60           
SHEET    7 AA3 8 VAL C  28  ILE C  37 -1  N  PHE C  30   O  LEU C  69           
SHEET    8 AA3 8 LEU C   9  ARG C  15 -1  N  LEU C   9   O  ILE C  37           
SHEET    1 AA4 5 ALA B  20  GLN B  23  0                                        
SHEET    2 AA4 5 GLY B  91  GLU B 102  1  O  HIS B  98   N  ALA B  20           
SHEET    3 AA4 5 GLY B  80  ASN B  88 -1  N  GLY B  80   O  LEU B  99           
SHEET    4 AA4 5 THR B  41  LYS B  46 -1  N  GLU B  45   O  ARG B  83           
SHEET    5 AA4 5 GLN B  49  PRO B  50 -1  O  GLN B  49   N  LYS B  46           
SHEET    1 AA5 5 ALA C  20  GLN C  23  0                                        
SHEET    2 AA5 5 GLY C  91  GLU C 102  1  O  HIS C  98   N  ALA C  20           
SHEET    3 AA5 5 GLY C  80  ASN C  88 -1  N  ALA C  86   O  THR C  93           
SHEET    4 AA5 5 THR C  41  LYS C  46 -1  N  GLU C  45   O  ARG C  83           
SHEET    5 AA5 5 GLN C  49  PRO C  50 -1  O  GLN C  49   N  LYS C  46           
SHEET    1 AA6 5 ALA D  20  GLN D  23  0                                        
SHEET    2 AA6 5 GLY D  91  GLU D 102  1  O  GLU D 102   N  CYS D  22           
SHEET    3 AA6 5 GLY D  80  ASN D  88 -1  N  ALA D  86   O  THR D  93           
SHEET    4 AA6 5 THR D  41  LYS D  46 -1  N  GLU D  45   O  ARG D  83           
SHEET    5 AA6 5 GLN D  49  PRO D  50 -1  O  GLN D  49   N  LYS D  46           
CISPEP   1 ILE A   37    PRO A   38          0        -2.65                     
CISPEP   2 ILE B   37    PRO B   38          0        -6.19                     
CISPEP   3 ILE C   37    PRO C   38          0        -1.51                     
CISPEP   4 ILE D   37    PRO D   38          0        -2.80                     
SITE     1 AC1  3 LYS A  14  ARG A  33  PRO B  38                               
SITE     1 AC2  3 ARG A  83  SER A  94  CYS A  95                               
SITE     1 AC3  6 ARG A  72  HOH A 308  GLN B 100  GLU B 102                    
SITE     2 AC3  6 ARG B 103  HOH B 308                                          
SITE     1 AC4  4 SER A  27  HIS A  70  SER B  27  ARG B  72                    
SITE     1 AC5  8 ARG A  15  ARG B  33  LEU B  64  ASP B  65                    
SITE     2 AC5  8 HOH B 316  HOH B 331  HOH B 346  HOH C 329                    
SITE     1 AC6  4 ARG B  83  SER B  94  HOH B 301  HOH B 348                    
SITE     1 AC7  2 ARG B 105  GLU D  62                                          
SITE     1 AC8  5 ARG B 103  ARG B 105  GLU C  58  HOH C 301                    
SITE     2 AC8  5 HOH C 302                                                     
CRYST1  106.061  106.061   75.481  90.00  90.00 120.00 P 32 2 1     24          
ORIGX1      1.000000  0.000000  0.000000        0.00000                         
ORIGX2      0.000000  1.000000  0.000000        0.00000                         
ORIGX3      0.000000  0.000000  1.000000        0.00000                         
SCALE1      0.009429  0.005444  0.000000        0.00000                         
SCALE2      0.000000  0.010887  0.000000        0.00000                         
SCALE3      0.000000  0.000000  0.013248        0.00000                         
ATOM      1  N   THR A   8      89.345  -3.551   2.754  1.00 57.97           N  
ANISOU    1  N   THR A   8     6421   5616   9989  -2279   -885  -1008       N  
ATOM      2  CA  THR A   8      89.524  -4.732   1.910  1.00 59.47           C  
ANISOU    2  CA  THR A   8     6475   6014  10107  -2182   -834   -740       C  
ATOM      3  C   THR A   8      89.435  -6.026   2.718  1.00 55.67           C  
ANISOU    3  C   THR A   8     6016   5871   9267  -2064   -933   -836       C  
ATOM      4  O   THR A   8      90.234  -6.259   3.625  1.00 58.60           O  
ANISOU    4  O   THR A   8     6297   6406   9563  -2189  -1119   -971       O  
ATOM      5  CB  THR A   8      90.870  -4.686   1.169  1.00 64.79           C  
ANISOU    5  CB  THR A   8     6923   6788  10907  -2307   -806   -504       C  
ATOM      6  OG1 THR A   8      90.867  -3.588   0.250  1.00 70.36           O  
ANISOU    6  OG1 THR A   8     7659   7244  11830  -2372   -674   -330       O  
ATOM      7  CG2 THR A   8      91.105  -5.970   0.407  1.00 59.79           C  
ANISOU    7  CG2 THR A   8     6149   6418  10151  -2183   -727   -276       C  
ATOM      8  N   LEU A   9      88.460  -6.868   2.375  1.00 57.16           N  
ANISOU    8  N   LEU A   9     6323   6161   9233  -1831   -824   -743       N  
ATOM      9  CA  LEU A   9      88.169  -8.079   3.132  1.00 52.41           C  
ANISOU    9  CA  LEU A   9     5781   5839   8295  -1710   -904   -810       C  
ATOM     10  C   LEU A   9      87.894  -9.237   2.187  1.00 43.29           C  
ANISOU   10  C   LEU A   9     4597   4837   7013  -1503   -782   -557       C  
ATOM     11  O   LEU A   9      87.031  -9.133   1.310  1.00 40.64           O  
ANISOU   11  O   LEU A   9     4353   4393   6697  -1381   -620   -443       O  
ATOM     12  CB  LEU A   9      86.962  -7.879   4.053  1.00 57.52           C  
ANISOU   12  CB  LEU A   9     6653   6435   8767  -1659   -898  -1073       C  
ATOM     13  CG  LEU A   9      87.255  -7.631   5.528  1.00 66.77           C  
ANISOU   13  CG  LEU A   9     7875   7699   9794  -1833  -1079  -1383       C  
ATOM     14  CD1 LEU A   9      85.980  -7.206   6.229  1.00 65.95           C  
ANISOU   14  CD1 LEU A   9     7984   7502   9572  -1791   -990  -1671       C  
ATOM     15  CD2 LEU A   9      87.846  -8.877   6.171  1.00 69.57           C  
ANISOU   15  CD2 LEU A   9     8168   8401   9864  -1832  -1256  -1304       C  
ATOM     16  N   ARG A  10      88.609 -10.340   2.391  1.00 39.05           N  
ANISOU   16  N   ARG A  10     3931   4544   6360  -1465   -876   -478       N  
ATOM     17  CA  ARG A  10      88.389 -11.536   1.595  1.00 34.53           C  
ANISOU   17  CA  ARG A  10     3328   4110   5680  -1270   -767   -290       C  
ATOM     18  C   ARG A  10      86.950 -12.016   1.765  1.00 32.95           C  
ANISOU   18  C   ARG A  10     3354   3915   5251  -1106   -701   -334       C  
ATOM     19  O   ARG A  10      86.348 -11.844   2.830  1.00 38.51           O  
ANISOU   19  O   ARG A  10     4201   4620   5811  -1135   -783   -518       O  
ATOM     20  CB  ARG A  10      89.356 -12.644   2.007  1.00 38.70           C  
ANISOU   20  CB  ARG A  10     3675   4857   6171  -1245   -914   -233       C  
ATOM     21  CG  ARG A  10      89.168 -13.157   3.427  1.00 51.44           C  
ANISOU   21  CG  ARG A  10     5383   6601   7561  -1262  -1137   -353       C  
ATOM     22  CD  ARG A  10      90.361 -14.035   3.828  1.00 68.25           C  
ANISOU   22  CD  ARG A  10     7279   8905   9747  -1273  -1340   -257       C  
ATOM     23  NE  ARG A  10      90.033 -15.090   4.785  1.00 73.41           N  
ANISOU   23  NE  ARG A  10     8022   9713  10157  -1204  -1517   -234       N  
ATOM     24  CZ  ARG A  10      89.175 -16.081   4.561  1.00 74.74           C  
ANISOU   24  CZ  ARG A  10     8310   9913  10176  -1022  -1429   -149       C  
ATOM     25  NH1 ARG A  10      88.530 -16.175   3.400  1.00 71.11           N  
ANISOU   25  NH1 ARG A  10     7896   9356   9765   -883  -1172   -100       N  
ATOM     26  NH2 ARG A  10      88.961 -16.987   5.506  1.00 77.47           N  
ANISOU   26  NH2 ARG A  10     8729  10391  10314   -998  -1612   -100       N  
ATOM     27  N   PRO A  11      86.371 -12.617   0.728  1.00 30.00           N  
ANISOU   27  N   PRO A  11     3009   3559   4831   -950   -544   -183       N  
ATOM     28  CA  PRO A  11      84.985 -13.090   0.832  1.00 29.99           C  
ANISOU   28  CA  PRO A  11     3195   3562   4637   -803   -483   -216       C  
ATOM     29  C   PRO A  11      84.893 -14.245   1.817  1.00 36.24           C  
ANISOU   29  C   PRO A  11     4023   4537   5211   -747   -606   -263       C  
ATOM     30  O   PRO A  11      85.743 -15.137   1.825  1.00 36.61           O  
ANISOU   30  O   PRO A  11     3933   4712   5264   -724   -686   -171       O  
ATOM     31  CB  PRO A  11      84.652 -13.537  -0.598  1.00 29.67           C  
ANISOU   31  CB  PRO A  11     3139   3531   4604   -684   -317    -29       C  
ATOM     32  CG  PRO A  11      85.769 -12.967  -1.465  1.00 31.12           C  
ANISOU   32  CG  PRO A  11     3155   3684   4986   -798   -257     90       C  
ATOM     33  CD  PRO A  11      86.962 -12.928  -0.583  1.00 31.58           C  
ANISOU   33  CD  PRO A  11     3064   3802   5133   -917   -408      8       C  
ATOM     34  N   MET A  12      83.857 -14.220   2.656  1.00 28.36           N  
ANISOU   34  N   MET A  12     3195   3544   4038   -732   -618   -400       N  
ATOM     35  CA  MET A  12      83.628 -15.271   3.644  1.00 35.38           C  
ANISOU   35  CA  MET A  12     4148   4610   4683   -710   -730   -417       C  
ATOM     36  C   MET A  12      82.155 -15.641   3.663  1.00 32.41           C  
ANISOU   36  C   MET A  12     3931   4234   4149   -600   -608   -449       C  
ATOM     37  O   MET A  12      81.294 -14.755   3.653  1.00 30.65           O  
ANISOU   37  O   MET A  12     3795   3886   3964   -602   -500   -582       O  
ATOM     38  CB  MET A  12      84.067 -14.819   5.040  1.00 39.17           C  
ANISOU   38  CB  MET A  12     4662   5172   5047   -889   -905   -588       C  
ATOM     39  CG  MET A  12      85.413 -14.124   5.067  1.00 50.47           C  
ANISOU   39  CG  MET A  12     5933   6570   6674  -1034  -1028   -604       C  
ATOM     40  SD  MET A  12      86.018 -13.888   6.743  1.00 61.78           S  
ANISOU   40  SD  MET A  12     7398   8166   7909  -1263  -1294   -783       S  
ATOM     41  CE  MET A  12      86.436 -15.578   7.181  1.00 63.70           C  
ANISOU   41  CE  MET A  12     7578   8648   7976  -1188  -1491   -541       C  
ATOM     42  N   PHE A  13      81.865 -16.941   3.700  1.00 24.88           N  
ANISOU   42  N   PHE A  13     2997   3400   3055   -506   -629   -330       N  
ATOM     43  CA  PHE A  13      80.482 -17.383   3.829  1.00 25.84           C  
ANISOU   43  CA  PHE A  13     3253   3543   3022   -429   -526   -358       C  
ATOM     44  C   PHE A  13      80.006 -17.173   5.259  1.00 28.90           C  
ANISOU   44  C   PHE A  13     3763   4036   3181   -549   -574   -528       C  
ATOM     45  O   PHE A  13      80.656 -17.614   6.212  1.00 31.61           O  
ANISOU   45  O   PHE A  13     4112   4528   3370   -655   -744   -507       O  
ATOM     46  CB  PHE A  13      80.332 -18.850   3.441  1.00 21.07           C  
ANISOU   46  CB  PHE A  13     2633   3012   2360   -315   -537   -182       C  
ATOM     47  CG  PHE A  13      80.465 -19.094   1.977  1.00 25.29           C  
ANISOU   47  CG  PHE A  13     3081   3466   3061   -197   -432    -73       C  
ATOM     48  CD1 PHE A  13      79.444 -18.747   1.104  1.00 30.52           C  
ANISOU   48  CD1 PHE A  13     3797   4047   3751   -125   -284    -81       C  
ATOM     49  CD2 PHE A  13      81.609 -19.681   1.470  1.00 27.57           C  
ANISOU   49  CD2 PHE A  13     3224   3775   3475   -166   -484     31       C  
ATOM     50  CE1 PHE A  13      79.576 -18.966  -0.250  1.00 32.38           C  
ANISOU   50  CE1 PHE A  13     3971   4249   4082    -50   -196     19       C  
ATOM     51  CE2 PHE A  13      81.746 -19.905   0.119  1.00 29.17           C  
ANISOU   51  CE2 PHE A  13     3353   3940   3791    -81   -357     96       C  
ATOM     52  CZ  PHE A  13      80.733 -19.546  -0.743  1.00 22.75           C  
ANISOU   52  CZ  PHE A  13     2623   3072   2948    -36   -217     93       C  
ATOM     53  N   LYS A  14      78.881 -16.487   5.407  1.00 28.42           N  
ANISOU   53  N   LYS A  14     3790   3908   3101   -539   -427   -698       N  
ATOM     54  CA  LYS A  14      78.186 -16.421   6.682  1.00 30.25           C  
ANISOU   54  CA  LYS A  14     4142   4270   3083   -644   -403   -886       C  
ATOM     55  C   LYS A  14      77.160 -17.530   6.806  1.00 24.52           C  
ANISOU   55  C   LYS A  14     3479   3659   2177   -579   -331   -789       C  
ATOM     56  O   LYS A  14      76.791 -17.905   7.921  1.00 25.94           O  
ANISOU   56  O   LYS A  14     3755   4022   2079   -694   -342   -855       O  
ATOM     57  CB  LYS A  14      77.483 -15.070   6.834  1.00 37.10           C  
ANISOU   57  CB  LYS A  14     5040   4988   4070   -663   -253  -1167       C  
ATOM     58  CG  LYS A  14      78.395 -13.864   6.824  1.00 39.76           C  
ANISOU   58  CG  LYS A  14     5326   5176   4606   -756   -317  -1297       C  
ATOM     59  CD  LYS A  14      79.115 -13.714   8.141  1.00 52.91           C  
ANISOU   59  CD  LYS A  14     7046   7013   6043   -967   -459  -1466       C  
ATOM     60  CE  LYS A  14      79.642 -12.298   8.322  1.00 58.86           C  
ANISOU   60  CE  LYS A  14     7774   7587   7001  -1083   -474  -1711       C  
ATOM     61  NZ  LYS A  14      80.202 -12.104   9.688  1.00 61.58           N  
ANISOU   61  NZ  LYS A  14     8192   8127   7080  -1316   -610  -1933       N  
ATOM     62  N   ARG A  15      76.688 -18.042   5.673  1.00 22.36           N  
ANISOU   62  N   ARG A  15     3156   3291   2047   -422   -255   -634       N  
ATOM     63  CA  ARG A  15      75.761 -19.162   5.616  1.00 23.47           C  
ANISOU   63  CA  ARG A  15     3337   3511   2070   -361   -199   -523       C  
ATOM     64  C   ARG A  15      76.121 -19.980   4.387  1.00 22.75           C  
ANISOU   64  C   ARG A  15     3169   3344   2130   -232   -234   -309       C  
ATOM     65  O   ARG A  15      76.190 -19.438   3.282  1.00 22.67           O  
ANISOU   65  O   ARG A  15     3095   3203   2315   -147   -177   -295       O  
ATOM     66  CB  ARG A  15      74.311 -18.683   5.536  1.00 26.86           C  
ANISOU   66  CB  ARG A  15     3787   3892   2529   -311     -5   -671       C  
ATOM     67  CG  ARG A  15      73.341 -19.788   5.202  1.00 27.70           C  
ANISOU   67  CG  ARG A  15     3898   4046   2579   -242     56   -542       C  
ATOM     68  CD  ARG A  15      71.921 -19.269   5.107  1.00 34.09           C  
ANISOU   68  CD  ARG A  15     4682   4810   3461   -189    238   -689       C  
ATOM     69  NE  ARG A  15      70.976 -20.365   4.929  1.00 35.65           N  
ANISOU   69  NE  ARG A  15     4876   5078   3591   -160    289   -575       N  
ATOM     70  CZ  ARG A  15      69.658 -20.229   4.997  1.00 37.73           C  
ANISOU   70  CZ  ARG A  15     5096   5351   3889   -133    442   -676       C  
ATOM     71  NH1 ARG A  15      69.127 -19.034   5.239  1.00 34.38           N  
ANISOU   71  NH1 ARG A  15     4622   4855   3586   -111    565   -905       N  
ATOM     72  NH2 ARG A  15      68.876 -21.289   4.830  1.00 34.26           N  
ANISOU   72  NH2 ARG A  15     4644   4976   3396   -130    472   -559       N  
ATOM     73  N   LEU A  16      76.378 -21.268   4.578  1.00 19.26           N  
ANISOU   73  N   LEU A  16     2733   2982   1601   -229   -330   -145       N  
ATOM     74  CA  LEU A  16      76.794 -22.147   3.499  1.00 19.14           C  
ANISOU   74  CA  LEU A  16     2640   2895   1736   -112   -355     11       C  
ATOM     75  C   LEU A  16      75.591 -22.816   2.854  1.00 21.07           C  
ANISOU   75  C   LEU A  16     2915   3109   1982    -31   -243     44       C  
ATOM     76  O   LEU A  16      74.509 -22.907   3.440  1.00 22.02           O  
ANISOU   76  O   LEU A  16     3104   3287   1975    -74   -175     -3       O  
ATOM     77  CB  LEU A  16      77.750 -23.227   4.013  1.00 21.43           C  
ANISOU   77  CB  LEU A  16     2896   3238   2010   -134   -534    166       C  
ATOM     78  CG  LEU A  16      79.144 -22.831   4.497  1.00 33.16           C  
ANISOU   78  CG  LEU A  16     4301   4757   3543   -202   -696    180       C  
ATOM     79  CD1 LEU A  16      79.790 -24.001   5.224  1.00 35.22           C  
ANISOU   79  CD1 LEU A  16     4535   5075   3772   -227   -905    367       C  
ATOM     80  CD2 LEU A  16      79.997 -22.411   3.334  1.00 34.78           C  
ANISOU   80  CD2 LEU A  16     4364   4862   3990   -120   -650    170       C  
ATOM     81  N   LEU A  17      75.801 -23.294   1.628  1.00 19.51           N  
ANISOU   81  N   LEU A  17     2653   2835   1925     71   -218    112       N  
ATOM     82  CA  LEU A  17      74.829 -24.166   0.984  1.00 20.41           C  
ANISOU   82  CA  LEU A  17     2787   2925   2042    132   -154    150       C  
ATOM     83  C   LEU A  17      74.588 -25.404   1.838  1.00 22.50           C  
ANISOU   83  C   LEU A  17     3100   3227   2219     87   -228    246       C  
ATOM     84  O   LEU A  17      75.508 -25.938   2.463  1.00 24.66           O  
ANISOU   84  O   LEU A  17     3360   3514   2496     58   -360    338       O  
ATOM     85  CB  LEU A  17      75.331 -24.590  -0.399  1.00 21.04           C  
ANISOU   85  CB  LEU A  17     2796   2942   2255    222   -127    182       C  
ATOM     86  CG  LEU A  17      75.339 -23.541  -1.506  1.00 21.10           C  
ANISOU   86  CG  LEU A  17     2770   2925   2321    248    -43    142       C  
ATOM     87  CD1 LEU A  17      76.037 -24.065  -2.757  1.00 20.78           C  
ANISOU   87  CD1 LEU A  17     2664   2877   2356    300     -5    163       C  
ATOM     88  CD2 LEU A  17      73.914 -23.075  -1.816  1.00 20.23           C  
ANISOU   88  CD2 LEU A  17     2704   2808   2175    259     23    112       C  
ATOM     89  N   ALA A  18      73.345 -25.868   1.859  1.00 21.06           N  
ANISOU   89  N   ALA A  18     2965   3059   1979     73   -156    246       N  
ATOM     90  CA  ALA A  18      72.998 -27.107   2.532  1.00 20.07           C  
ANISOU   90  CA  ALA A  18     2887   2949   1791     15   -214    366       C  
ATOM     91  C   ALA A  18      72.380 -28.073   1.529  1.00 23.03           C  
ANISOU   91  C   ALA A  18     3239   3227   2285     79   -176    389       C  
ATOM     92  O   ALA A  18      71.693 -27.661   0.590  1.00 17.66           O  
ANISOU   92  O   ALA A  18     2532   2534   1645    129    -83    299       O  
ATOM     93  CB  ALA A  18      72.033 -26.858   3.699  1.00 28.79           C  
ANISOU   93  CB  ALA A  18     4066   4184   2690   -114   -151    341       C  
ATOM     94  N   ASN A  19      72.646 -29.364   1.722  1.00 18.96           N  
ANISOU   94  N   ASN A  19     2732   2633   1839     71   -269    516       N  
ATOM     95  CA  ASN A  19      72.002 -30.376   0.897  1.00 22.63           C  
ANISOU   95  CA  ASN A  19     3185   2990   2422    104   -239    514       C  
ATOM     96  C   ASN A  19      70.488 -30.232   0.968  1.00 17.15           C  
ANISOU   96  C   ASN A  19     2518   2367   1631     32   -134    473       C  
ATOM     97  O   ASN A  19      69.931 -29.770   1.967  1.00 16.49           O  
ANISOU   97  O   ASN A  19     2471   2402   1392    -64    -91    489       O  
ATOM     98  CB  ASN A  19      72.394 -31.774   1.355  1.00 25.93           C  
ANISOU   98  CB  ASN A  19     3615   3281   2958     85   -364    673       C  
ATOM     99  CG  ASN A  19      73.864 -32.039   1.193  1.00 28.93           C  
ANISOU   99  CG  ASN A  19     3920   3563   3510    182   -472    706       C  
ATOM    100  OD1 ASN A  19      74.488 -31.556   0.249  1.00 22.25           O  
ANISOU  100  OD1 ASN A  19     3000   2707   2747    280   -412    572       O  
ATOM    101  ND2 ASN A  19      74.432 -32.803   2.118  1.00 27.29           N  
ANISOU  101  ND2 ASN A  19     3716   3289   3364    148   -635    901       N  
ATOM    102  N   ALA A  20      69.818 -30.641  -0.106  1.00 15.49           N  
ANISOU  102  N   ALA A  20     2277   2096   1512     68    -90    404       N  
ATOM    103  CA  ALA A  20      68.364 -30.634  -0.115  1.00 29.27           C  
ANISOU  103  CA  ALA A  20     4010   3898   3214      0    -11    374       C  
ATOM    104  C   ALA A  20      67.858 -31.773  -0.981  1.00 27.12           C  
ANISOU  104  C   ALA A  20     3721   3515   3069     -7    -35    358       C  
ATOM    105  O   ALA A  20      68.589 -32.339  -1.800  1.00 27.29           O  
ANISOU  105  O   ALA A  20     3741   3427   3203     62    -80    314       O  
ATOM    106  CB  ALA A  20      67.801 -29.300  -0.618  1.00 17.73           C  
ANISOU  106  CB  ALA A  20     2496   2525   1715     47     69    259       C  
ATOM    107  N   GLU A  21      66.590 -32.111  -0.779  1.00 22.64           N  
ANISOU  107  N   GLU A  21     3132   2979   2493   -103      8    373       N  
ATOM    108  CA  GLU A  21      65.875 -32.997  -1.680  1.00 25.90           C  
ANISOU  108  CA  GLU A  21     3513   3307   3019   -133    -12    321       C  
ATOM    109  C   GLU A  21      64.489 -32.432  -1.924  1.00 24.91           C  
ANISOU  109  C   GLU A  21     3302   3300   2864   -178     52    264       C  
ATOM    110  O   GLU A  21      63.910 -31.761  -1.064  1.00 22.03           O  
ANISOU  110  O   GLU A  21     2900   3049   2424   -219    134    288       O  
ATOM    111  CB  GLU A  21      65.758 -34.440  -1.150  1.00 22.86           C  
ANISOU  111  CB  GLU A  21     3166   2776   2744   -236    -65    437       C  
ATOM    112  CG  GLU A  21      64.942 -34.618   0.117  1.00 23.64           C  
ANISOU  112  CG  GLU A  21     3271   2953   2759   -389    -16    583       C  
ATOM    113  CD  GLU A  21      63.455 -34.890  -0.141  1.00 36.08           C  
ANISOU  113  CD  GLU A  21     4762   4569   4377   -500     47    544       C  
ATOM    114  OE1 GLU A  21      63.031 -35.011  -1.314  1.00 30.55           O  
ANISOU  114  OE1 GLU A  21     4006   3829   3773   -464     18    411       O  
ATOM    115  OE2 GLU A  21      62.705 -34.990   0.849  1.00 30.48           O  
ANISOU  115  OE2 GLU A  21     4034   3952   3594   -642    125    646       O  
ATOM    116  N   CYS A  22      63.968 -32.708  -3.113  1.00 24.69           N  
ANISOU  116  N   CYS A  22     3230   3250   2902   -173     11    171       N  
ATOM    117  CA  CYS A  22      62.576 -32.432  -3.408  1.00 28.46           C  
ANISOU  117  CA  CYS A  22     3593   3817   3403   -229     28    137       C  
ATOM    118  C   CYS A  22      62.063 -33.515  -4.343  1.00 28.95           C  
ANISOU  118  C   CYS A  22     3640   3802   3557   -304    -51     72       C  
ATOM    119  O   CYS A  22      62.833 -34.310  -4.888  1.00 27.87           O  
ANISOU  119  O   CYS A  22     3584   3545   3461   -290   -101     15       O  
ATOM    120  CB  CYS A  22      62.396 -31.042  -4.024  1.00 24.15           C  
ANISOU  120  CB  CYS A  22     2981   3380   2817   -128     27     89       C  
ATOM    121  SG  CYS A  22      63.065 -30.935  -5.682  1.00 31.12           S  
ANISOU  121  SG  CYS A  22     3911   4259   3652    -60    -74     13       S  
ATOM    122  N   GLN A  23      60.744 -33.550  -4.493  1.00 22.90           N  
ANISOU  122  N   GLN A  23     2752   3102   2845   -390    -58     60       N  
ATOM    123  CA  GLN A  23      60.089 -34.424  -5.451  1.00 26.80           C  
ANISOU  123  CA  GLN A  23     3210   3554   3420   -484   -153    -26       C  
ATOM    124  C   GLN A  23      60.054 -33.745  -6.814  1.00 24.62           C  
ANISOU  124  C   GLN A  23     2911   3382   3061   -420   -249   -119       C  
ATOM    125  O   GLN A  23      59.895 -32.524  -6.907  1.00 21.48           O  
ANISOU  125  O   GLN A  23     2449   3100   2611   -333   -247    -76       O  
ATOM    126  CB  GLN A  23      58.671 -34.741  -4.970  1.00 26.84           C  
ANISOU  126  CB  GLN A  23     3066   3601   3530   -624   -128     18       C  
ATOM    127  CG  GLN A  23      57.829 -35.601  -5.884  1.00 24.31           C  
ANISOU  127  CG  GLN A  23     2678   3247   3310   -752   -243    -72       C  
ATOM    128  CD  GLN A  23      56.430 -35.834  -5.325  1.00 32.58           C  
ANISOU  128  CD  GLN A  23     3542   4351   4487   -899   -203    -15       C  
ATOM    129  OE1 GLN A  23      55.447 -35.300  -5.836  1.00 38.89           O  
ANISOU  129  OE1 GLN A  23     4165   5278   5332   -910   -262    -47       O  
ATOM    130  NE2 GLN A  23      56.338 -36.637  -4.275  1.00 30.08           N  
ANISOU  130  NE2 GLN A  23     3250   3940   4238  -1022   -109     87       N  
ATOM    131  N   GLU A  24      60.213 -34.534  -7.871  1.00 21.86           N  
ANISOU  131  N   GLU A  24     2618   2989   2700   -474   -336   -247       N  
ATOM    132  CA  GLU A  24      60.155 -33.959  -9.207  1.00 30.18           C  
ANISOU  132  CA  GLU A  24     3668   4182   3617   -456   -438   -323       C  
ATOM    133  C   GLU A  24      58.807 -33.279  -9.424  1.00 30.64           C  
ANISOU  133  C   GLU A  24     3554   4381   3708   -494   -532   -252       C  
ATOM    134  O   GLU A  24      57.761 -33.771  -8.986  1.00 26.21           O  
ANISOU  134  O   GLU A  24     2871   3802   3288   -594   -543   -237       O  
ATOM    135  CB  GLU A  24      60.412 -35.032 -10.267  1.00 27.05           C  
ANISOU  135  CB  GLU A  24     3357   3738   3184   -547   -501   -518       C  
ATOM    136  CG  GLU A  24      59.227 -35.875 -10.669  1.00 39.98           C  
ANISOU  136  CG  GLU A  24     4915   5369   4908   -716   -611   -603       C  
ATOM    137  CD  GLU A  24      59.571 -36.831 -11.806  1.00 53.46           C  
ANISOU  137  CD  GLU A  24     6723   7037   6551   -809   -666   -852       C  
ATOM    138  OE1 GLU A  24      59.966 -37.978 -11.515  1.00 57.17           O  
ANISOU  138  OE1 GLU A  24     7255   7283   7182   -847   -612   -963       O  
ATOM    139  OE2 GLU A  24      59.461 -36.436 -12.988  1.00 54.61           O  
ANISOU  139  OE2 GLU A  24     6887   7374   6488   -852   -765   -940       O  
ATOM    140  N   GLY A  25      58.841 -32.121 -10.079  1.00 22.88           N  
ANISOU  140  N   GLY A  25     2543   3530   2620   -415   -602   -190       N  
ATOM    141  CA  GLY A  25      57.672 -31.288 -10.242  1.00 25.78           C  
ANISOU  141  CA  GLY A  25     2721   4005   3068   -407   -706    -90       C  
ATOM    142  C   GLY A  25      57.490 -30.249  -9.158  1.00 30.49           C  
ANISOU  142  C   GLY A  25     3212   4576   3797   -284   -591     16       C  
ATOM    143  O   GLY A  25      56.759 -29.273  -9.366  1.00 31.94           O  
ANISOU  143  O   GLY A  25     3237   4822   4077   -223   -671    102       O  
ATOM    144  N   GLN A  26      58.144 -30.422  -8.015  1.00 21.69           N  
ANISOU  144  N   GLN A  26     2177   3368   2696   -250   -415      6       N  
ATOM    145  CA  GLN A  26      58.063 -29.467  -6.928  1.00 23.20           C  
ANISOU  145  CA  GLN A  26     2293   3549   2974   -155   -283     57       C  
ATOM    146  C   GLN A  26      59.208 -28.463  -7.030  1.00 27.93           C  
ANISOU  146  C   GLN A  26     3006   4126   3481    -29   -262     91       C  
ATOM    147  O   GLN A  26      60.098 -28.574  -7.875  1.00 27.70           O  
ANISOU  147  O   GLN A  26     3110   4102   3315    -22   -326     86       O  
ATOM    148  CB  GLN A  26      58.089 -30.193  -5.585  1.00 22.08           C  
ANISOU  148  CB  GLN A  26     2179   3355   2856   -226   -119     42       C  
ATOM    149  CG  GLN A  26      56.936 -31.155  -5.398  1.00 23.75           C  
ANISOU  149  CG  GLN A  26     2264   3579   3179   -376   -119     30       C  
ATOM    150  CD  GLN A  26      55.617 -30.442  -5.241  1.00 23.91           C  
ANISOU  150  CD  GLN A  26     2025   3689   3368   -363    -99     35       C  
ATOM    151  OE1 GLN A  26      55.566 -29.308  -4.757  1.00 26.68           O  
ANISOU  151  OE1 GLN A  26     2297   4066   3773   -246    -12     34       O  
ATOM    152  NE2 GLN A  26      54.536 -31.096  -5.656  1.00 25.66           N  
ANISOU  152  NE2 GLN A  26     2094   3948   3709   -482   -183     24       N  
ATOM    153  N   SER A  27      59.191 -27.473  -6.150  1.00 31.23           N  
ANISOU  153  N   SER A  27     3364   4523   3981     58   -156    106       N  
ATOM    154  CA  SER A  27      60.234 -26.463  -6.090  1.00 21.64           C  
ANISOU  154  CA  SER A  27     2240   3265   2716    160   -127    131       C  
ATOM    155  C   SER A  27      61.202 -26.766  -4.955  1.00 22.03           C  
ANISOU  155  C   SER A  27     2418   3275   2679    147     10     89       C  
ATOM    156  O   SER A  27      60.878 -27.477  -4.002  1.00 25.91           O  
ANISOU  156  O   SER A  27     2903   3776   3166     70    102     61       O  
ATOM    157  CB  SER A  27      59.628 -25.072  -5.893  1.00 23.66           C  
ANISOU  157  CB  SER A  27     2342   3493   3154    266   -117    154       C  
ATOM    158  OG  SER A  27      58.839 -24.718  -7.003  1.00 34.88           O  
ANISOU  158  OG  SER A  27     3641   4944   4667    287   -292    243       O  
ATOM    159  N   VAL A  28      62.403 -26.201  -5.068  1.00 18.54           N  
ANISOU  159  N   VAL A  28     2086   2796   2163    206     10    105       N  
ATOM    160  CA  VAL A  28      63.415 -26.326  -4.032  1.00 21.66           C  
ANISOU  160  CA  VAL A  28     2588   3162   2482    198    100     81       C  
ATOM    161  C   VAL A  28      64.253 -25.056  -4.033  1.00 23.54           C  
ANISOU  161  C   VAL A  28     2852   3361   2730    278    108     86       C  
ATOM    162  O   VAL A  28      64.465 -24.426  -5.075  1.00 22.29           O  
ANISOU  162  O   VAL A  28     2688   3190   2592    324     32    141       O  
ATOM    163  CB  VAL A  28      64.287 -27.588  -4.233  1.00 21.98           C  
ANISOU  163  CB  VAL A  28     2745   3174   2434    150     67     90       C  
ATOM    164  CG1 VAL A  28      65.142 -27.443  -5.474  1.00 18.31           C  
ANISOU  164  CG1 VAL A  28     2333   2705   1918    192      0     93       C  
ATOM    165  CG2 VAL A  28      65.141 -27.839  -2.992  1.00 23.12           C  
ANISOU  165  CG2 VAL A  28     2968   3292   2523    127    124    104       C  
ATOM    166  N   CYS A  29      64.712 -24.672  -2.848  1.00 20.95           N  
ANISOU  166  N   CYS A  29     2559   3023   2379    272    196     36       N  
ATOM    167  CA  CYS A  29      65.464 -23.443  -2.655  1.00 26.43           C  
ANISOU  167  CA  CYS A  29     3272   3663   3109    326    211     13       C  
ATOM    168  C   CYS A  29      66.762 -23.746  -1.921  1.00 28.90           C  
ANISOU  168  C   CYS A  29     3694   3983   3303    284    220      5       C  
ATOM    169  O   CYS A  29      66.755 -24.469  -0.919  1.00 30.78           O  
ANISOU  169  O   CYS A  29     3973   4273   3447    213    257    -10       O  
ATOM    170  CB  CYS A  29      64.630 -22.430  -1.869  1.00 38.50           C  
ANISOU  170  CB  CYS A  29     4701   5167   4760    356    305    -91       C  
ATOM    171  SG  CYS A  29      65.333 -20.783  -1.806  1.00 51.58           S  
ANISOU  171  SG  CYS A  29     6357   6697   6546    425    309   -139       S  
ATOM    172  N   PHE A  30      67.872 -23.215  -2.441  1.00 20.87           N  
ANISOU  172  N   PHE A  30     2714   2922   2293    316    175     38       N  
ATOM    173  CA  PHE A  30      69.169 -23.179  -1.776  1.00 22.54           C  
ANISOU  173  CA  PHE A  30     2988   3133   2445    286    165     28       C  
ATOM    174  C   PHE A  30      69.507 -21.731  -1.437  1.00 27.64           C  
ANISOU  174  C   PHE A  30     3618   3719   3167    299    188    -34       C  
ATOM    175  O   PHE A  30      69.107 -20.806  -2.149  1.00 28.74           O  
ANISOU  175  O   PHE A  30     3705   3783   3431    349    186    -17       O  
ATOM    176  CB  PHE A  30      70.286 -23.742  -2.664  1.00 31.23           C  
ANISOU  176  CB  PHE A  30     4111   4225   3529    302    110     95       C  
ATOM    177  CG  PHE A  30      70.187 -25.212  -2.923  1.00 40.19           C  
ANISOU  177  CG  PHE A  30     5266   5377   4629    291     87    120       C  
ATOM    178  CD1 PHE A  30      70.801 -26.123  -2.077  1.00 35.79           C  
ANISOU  178  CD1 PHE A  30     4741   4811   4048    261     53    145       C  
ATOM    179  CD2 PHE A  30      69.497 -25.687  -4.028  1.00 44.18           C  
ANISOU  179  CD2 PHE A  30     5755   5893   5138    302     79    123       C  
ATOM    180  CE1 PHE A  30      70.722 -27.486  -2.325  1.00 36.57           C  
ANISOU  180  CE1 PHE A  30     4852   4871   4173    256     24    170       C  
ATOM    181  CE2 PHE A  30      69.409 -27.042  -4.280  1.00 42.92           C  
ANISOU  181  CE2 PHE A  30     5615   5718   4976    283     60    112       C  
ATOM    182  CZ  PHE A  30      70.023 -27.944  -3.428  1.00 43.08           C  
ANISOU  182  CZ  PHE A  30     5663   5689   5019    267     38    134       C  
ATOM    183  N   GLU A  31      70.270 -21.533  -0.364  1.00 25.24           N  
ANISOU  183  N   GLU A  31     3356   3435   2798    242    190    -96       N  
ATOM    184  CA  GLU A  31      70.543 -20.190   0.126  1.00 29.90           C  
ANISOU  184  CA  GLU A  31     3936   3958   3468    230    216   -202       C  
ATOM    185  C   GLU A  31      71.950 -20.096   0.689  1.00 30.85           C  
ANISOU  185  C   GLU A  31     4097   4100   3525    162    151   -209       C  
ATOM    186  O   GLU A  31      72.449 -21.045   1.302  1.00 25.97           O  
ANISOU  186  O   GLU A  31     3520   3576   2772    110     98   -167       O  
ATOM    187  CB  GLU A  31      69.539 -19.785   1.211  1.00 31.19           C  
ANISOU  187  CB  GLU A  31     4088   4150   3614    201    321   -369       C  
ATOM    188  CG  GLU A  31      68.121 -19.590   0.706  1.00 48.04           C  
ANISOU  188  CG  GLU A  31     6127   6238   5886    279    387   -386       C  
ATOM    189  CD  GLU A  31      67.091 -20.111   1.684  1.00 63.70           C  
ANISOU  189  CD  GLU A  31     8092   8340   7772    225    504   -492       C  
ATOM    190  OE1 GLU A  31      67.105 -21.332   1.953  1.00 66.36           O  
ANISOU  190  OE1 GLU A  31     8483   8794   7938    157    484   -404       O  
ATOM    191  OE2 GLU A  31      66.280 -19.303   2.190  1.00 73.79           O  
ANISOU  191  OE2 GLU A  31     9291   9585   9160    246    623   -665       O  
ATOM    192  N   ILE A  32      72.576 -18.934   0.490  1.00 23.94           N  
ANISOU  192  N   ILE A  32     3199   3123   2775    157    139   -247       N  
ATOM    193  CA  ILE A  32      73.863 -18.607   1.087  1.00 25.98           C  
ANISOU  193  CA  ILE A  32     3469   3393   3009     75     71   -281       C  
ATOM    194  C   ILE A  32      73.838 -17.157   1.546  1.00 28.33           C  
ANISOU  194  C   ILE A  32     3760   3572   3431     36    105   -443       C  
ATOM    195  O   ILE A  32      72.974 -16.368   1.160  1.00 27.36           O  
ANISOU  195  O   ILE A  32     3605   3321   3469     98    173   -489       O  
ATOM    196  CB  ILE A  32      75.046 -18.810   0.119  1.00 31.47           C  
ANISOU  196  CB  ILE A  32     4115   4071   3771     88     12   -140       C  
ATOM    197  CG1 ILE A  32      74.817 -18.017  -1.169  1.00 33.20           C  
ANISOU  197  CG1 ILE A  32     4295   4177   4143    136     54    -62       C  
ATOM    198  CG2 ILE A  32      75.253 -20.269  -0.180  1.00 25.96           C  
ANISOU  198  CG2 ILE A  32     3413   3466   2984    124    -21    -35       C  
ATOM    199  CD1 ILE A  32      76.044 -17.898  -2.019  1.00 28.35           C  
ANISOU  199  CD1 ILE A  32     3625   3559   3586    107     35     46       C  
ATOM    200  N   ARG A  33      74.814 -16.821   2.380  1.00 26.64           N  
ANISOU  200  N   ARG A  33     3565   3389   3167    -70     41   -530       N  
ATOM    201  CA  ARG A  33      75.159 -15.445   2.695  1.00 29.06           C  
ANISOU  201  CA  ARG A  33     3859   3555   3626   -131     47   -685       C  
ATOM    202  C   ARG A  33      76.669 -15.334   2.591  1.00 27.33           C  
ANISOU  202  C   ARG A  33     3601   3345   3439   -215    -70   -610       C  
ATOM    203  O   ARG A  33      77.388 -16.164   3.153  1.00 26.63           O  
ANISOU  203  O   ARG A  33     3518   3413   3187   -273   -167   -566       O  
ATOM    204  CB  ARG A  33      74.691 -15.052   4.093  1.00 30.78           C  
ANISOU  204  CB  ARG A  33     4139   3832   3725   -220     99   -955       C  
ATOM    205  CG  ARG A  33      73.198 -14.896   4.199  1.00 34.00           C  
ANISOU  205  CG  ARG A  33     4541   4203   4174   -139    251  -1076       C  
ATOM    206  CD  ARG A  33      72.775 -14.487   5.604  1.00 36.68           C  
ANISOU  206  CD  ARG A  33     4935   4628   4374   -245    347  -1388       C  
ATOM    207  NE  ARG A  33      73.505 -13.323   6.099  1.00 32.55           N  
ANISOU  207  NE  ARG A  33     4424   3988   3956   -344    317  -1601       N  
ATOM    208  CZ  ARG A  33      74.134 -13.270   7.272  1.00 36.09           C  
ANISOU  208  CZ  ARG A  33     4951   4594   4166   -521    267  -1778       C  
ATOM    209  NH1 ARG A  33      74.121 -14.314   8.094  1.00 31.23           N  
ANISOU  209  NH1 ARG A  33     4416   4266   3183   -618    235  -1734       N  
ATOM    210  NH2 ARG A  33      74.758 -12.160   7.636  1.00 31.37           N  
ANISOU  210  NH2 ARG A  33     4355   3865   3698   -617    236  -1993       N  
ATOM    211  N   VAL A  34      77.149 -14.333   1.860  1.00 23.29           N  
ANISOU  211  N   VAL A  34     3032   2659   3156   -226    -69   -572       N  
ATOM    212  CA  VAL A  34      78.577 -14.166   1.617  1.00 28.42           C  
ANISOU  212  CA  VAL A  34     3609   3311   3877   -314   -157   -490       C  
ATOM    213  C   VAL A  34      78.915 -12.684   1.688  1.00 33.70           C  
ANISOU  213  C   VAL A  34     4255   3770   4779   -405   -160   -599       C  
ATOM    214  O   VAL A  34      78.249 -11.859   1.057  1.00 41.38           O  
ANISOU  214  O   VAL A  34     5229   4545   5949   -352    -91   -576       O  
ATOM    215  CB  VAL A  34      79.007 -14.766   0.266  1.00 42.19           C  
ANISOU  215  CB  VAL A  34     5282   5088   5661   -247   -135   -250       C  
ATOM    216  CG1 VAL A  34      78.173 -14.205  -0.863  1.00 54.73           C  
ANISOU  216  CG1 VAL A  34     6881   6540   7375   -173    -49   -144       C  
ATOM    217  CG2 VAL A  34      80.487 -14.498   0.023  1.00 49.92           C  
ANISOU  217  CG2 VAL A  34     6149   6072   6748   -347   -192   -185       C  
ATOM    218  N   SER A  35      79.942 -12.356   2.470  1.00 36.43           N  
ANISOU  218  N   SER A  35     4573   4147   5122   -549   -260   -709       N  
ATOM    219  CA  SER A  35      80.363 -10.985   2.710  1.00 43.97           C  
ANISOU  219  CA  SER A  35     5507   4896   6303   -671   -280   -853       C  
ATOM    220  C   SER A  35      81.772 -10.769   2.175  1.00 45.52           C  
ANISOU  220  C   SER A  35     5578   5080   6636   -778   -357   -706       C  
ATOM    221  O   SER A  35      82.555 -11.711   2.040  1.00 39.17           O  
ANISOU  221  O   SER A  35     4697   4466   5720   -778   -417   -574       O  
ATOM    222  CB  SER A  35      80.334 -10.654   4.206  1.00 54.98           C  
ANISOU  222  CB  SER A  35     6974   6346   7570   -793   -334  -1170       C  
ATOM    223  OG  SER A  35      81.175 -11.541   4.924  1.00 60.46           O  
ANISOU  223  OG  SER A  35     7654   7299   8019   -881   -475  -1145       O  
ATOM    224  N   GLY A  36      82.101  -9.507   1.896  1.00 41.95           N  
ANISOU  224  N   GLY A  36     5089   4386   6464   -875   -351   -737       N  
ATOM    225  CA  GLY A  36      83.427  -9.161   1.421  1.00 39.29           C  
ANISOU  225  CA  GLY A  36     4616   4026   6287  -1011   -406   -608       C  
ATOM    226  C   GLY A  36      83.556  -7.727   0.947  1.00 45.92           C  
ANISOU  226  C   GLY A  36     5432   4547   7468  -1113   -379   -592       C  
ATOM    227  O   GLY A  36      82.591  -7.141   0.448  1.00 44.40           O  
ANISOU  227  O   GLY A  36     5306   4142   7420  -1026   -301   -549       O  
ATOM    228  N   ILE A  37      84.747  -7.154   1.096  1.00 35.95           N  
ANISOU  228  N   ILE A  37     4058   3235   6366  -1304   -458   -609       N  
ATOM    229  CA  ILE A  37      85.025  -5.798   0.627  1.00 41.53           C  
ANISOU  229  CA  ILE A  37     4728   3620   7432  -1438   -444   -563       C  
ATOM    230  C   ILE A  37      86.138  -5.868  -0.411  1.00 45.42           C  
ANISOU  230  C   ILE A  37     5060   4183   8016  -1543   -413   -267       C  
ATOM    231  O   ILE A  37      87.269  -6.248  -0.075  1.00 46.91           O  
ANISOU  231  O   ILE A  37     5108   4551   8165  -1655   -488   -292       O  
ATOM    232  CB  ILE A  37      85.406  -4.866   1.789  1.00 51.60           C  
ANISOU  232  CB  ILE A  37     6012   4733   8860  -1616   -553   -894       C  
ATOM    233  CG1 ILE A  37      84.262  -4.767   2.799  1.00 59.76           C  
ANISOU  233  CG1 ILE A  37     7201   5717   9786  -1523   -535  -1225       C  
ATOM    234  CG2 ILE A  37      85.765  -3.484   1.267  1.00 54.21           C  
ANISOU  234  CG2 ILE A  37     6292   4692   9614  -1769   -547   -827       C  
ATOM    235  CD1 ILE A  37      83.012  -4.118   2.244  1.00 60.32           C  
ANISOU  235  CD1 ILE A  37     7350   5490  10078  -1372   -417  -1194       C  
ATOM    236  N   PRO A  38      85.873  -5.534  -1.685  1.00 52.75           N  
ANISOU  236  N   PRO A  38     5989   4998   9058  -1520   -305     25       N  
ATOM    237  CA  PRO A  38      84.574  -5.139  -2.249  1.00 53.84           C  
ANISOU  237  CA  PRO A  38     6259   4937   9262  -1382   -247    128       C  
ATOM    238  C   PRO A  38      83.576  -6.300  -2.310  1.00 50.54           C  
ANISOU  238  C   PRO A  38     5930   4740   8533  -1155   -201    123       C  
ATOM    239  O   PRO A  38      83.987  -7.449  -2.121  1.00 37.57           O  
ANISOU  239  O   PRO A  38     4246   3397   6632  -1111   -198     97       O  
ATOM    240  CB  PRO A  38      84.942  -4.652  -3.656  1.00 57.28           C  
ANISOU  240  CB  PRO A  38     6638   5293   9834  -1482   -175    507       C  
ATOM    241  CG  PRO A  38      86.191  -5.382  -3.986  1.00 62.42           C  
ANISOU  241  CG  PRO A  38     7135   6243  10338  -1584   -126    598       C  
ATOM    242  CD  PRO A  38      86.945  -5.491  -2.695  1.00 56.35           C  
ANISOU  242  CD  PRO A  38     6290   5533   9589  -1661   -239    297       C  
ATOM    243  N   PRO A  39      82.296  -6.003  -2.535  1.00 52.04           N  
ANISOU  243  N   PRO A  39     6223   4766   8784  -1015   -177    144       N  
ATOM    244  CA  PRO A  39      81.284  -7.068  -2.621  1.00 48.11           C  
ANISOU  244  CA  PRO A  39     5797   4465   8018   -817   -135    143       C  
ATOM    245  C   PRO A  39      81.660  -8.095  -3.673  1.00 48.25           C  
ANISOU  245  C   PRO A  39     5775   4760   7796   -793    -74    393       C  
ATOM    246  O   PRO A  39      81.833  -7.758  -4.854  1.00 45.38           O  
ANISOU  246  O   PRO A  39     5390   4366   7488   -852    -32    673       O  
ATOM    247  CB  PRO A  39      80.009  -6.310  -3.014  1.00 46.12           C  
ANISOU  247  CB  PRO A  39     5607   3941   7975   -706   -130    210       C  
ATOM    248  CG  PRO A  39      80.216  -4.941  -2.479  1.00 44.99           C  
ANISOU  248  CG  PRO A  39     5448   3441   8204   -812   -175     66       C  
ATOM    249  CD  PRO A  39      81.688  -4.662  -2.616  1.00 46.12           C  
ANISOU  249  CD  PRO A  39     5509   3614   8399  -1029   -200    146       C  
ATOM    250  N   PRO A  40      81.790  -9.361  -3.289  1.00 47.08           N  
ANISOU  250  N   PRO A  40     5620   4887   7381   -717    -65    298       N  
ATOM    251  CA  PRO A  40      82.313 -10.360  -4.225  1.00 46.08           C  
ANISOU  251  CA  PRO A  40     5433   5008   7066   -702      8    472       C  
ATOM    252  C   PRO A  40      81.328 -10.681  -5.334  1.00 41.63           C  
ANISOU  252  C   PRO A  40     4945   4488   6383   -601     69    659       C  
ATOM    253  O   PRO A  40      80.109 -10.588  -5.167  1.00 43.86           O  
ANISOU  253  O   PRO A  40     5317   4677   6669   -487     39    621       O  
ATOM    254  CB  PRO A  40      82.557 -11.584  -3.334  1.00 45.61           C  
ANISOU  254  CB  PRO A  40     5353   5159   6815   -629    -30    299       C  
ATOM    255  CG  PRO A  40      81.577 -11.427  -2.220  1.00 40.32           C  
ANISOU  255  CG  PRO A  40     4794   4402   6123   -561    -91     94       C  
ATOM    256  CD  PRO A  40      81.472  -9.943  -1.974  1.00 43.71           C  
ANISOU  256  CD  PRO A  40     5241   4551   6815   -653   -118     29       C  
ATOM    257  N   THR A  41      81.880 -11.059  -6.482  1.00 36.85           N  
ANISOU  257  N   THR A  41     4288   4043   5669   -657    159    849       N  
ATOM    258  CA  THR A  41      81.094 -11.595  -7.583  1.00 29.98           C  
ANISOU  258  CA  THR A  41     3488   3296   4607   -587    211   1006       C  
ATOM    259  C   THR A  41      81.021 -13.117  -7.472  1.00 28.12           C  
ANISOU  259  C   THR A  41     3248   3296   4139   -470    254    873       C  
ATOM    260  O   THR A  41      81.933 -13.768  -6.952  1.00 29.64           O  
ANISOU  260  O   THR A  41     3347   3593   4321   -473    274    748       O  
ATOM    261  CB  THR A  41      81.700 -11.190  -8.927  1.00 33.91           C  
ANISOU  261  CB  THR A  41     3950   3870   5064   -740    303   1269       C  
ATOM    262  OG1 THR A  41      82.900 -11.935  -9.152  1.00 39.08           O  
ANISOU  262  OG1 THR A  41     4480   4748   5619   -802    425   1213       O  
ATOM    263  CG2 THR A  41      82.037  -9.702  -8.926  1.00 36.15           C  
ANISOU  263  CG2 THR A  41     4214   3893   5628   -889    254   1414       C  
ATOM    264  N   LEU A  42      79.926 -13.679  -7.970  1.00 29.06           N  
ANISOU  264  N   LEU A  42     3458   3481   4104   -369    252    911       N  
ATOM    265  CA  LEU A  42      79.600 -15.083  -7.773  1.00 25.93           C  
ANISOU  265  CA  LEU A  42     3078   3245   3530   -252    272    775       C  
ATOM    266  C   LEU A  42      79.621 -15.839  -9.096  1.00 27.04           C  
ANISOU  266  C   LEU A  42     3225   3588   3459   -268    372    862       C  
ATOM    267  O   LEU A  42      79.259 -15.305 -10.145  1.00 31.46           O  
ANISOU  267  O   LEU A  42     3835   4173   3946   -340    386   1049       O  
ATOM    268  CB  LEU A  42      78.220 -15.234  -7.124  1.00 25.03           C  
ANISOU  268  CB  LEU A  42     3053   3048   3410   -130    189    694       C  
ATOM    269  CG  LEU A  42      78.107 -15.368  -5.605  1.00 34.06           C  
ANISOU  269  CG  LEU A  42     4200   4123   4616    -80    130    494       C  
ATOM    270  CD1 LEU A  42      78.892 -14.290  -4.872  1.00 36.33           C  
ANISOU  270  CD1 LEU A  42     4444   4270   5088   -175     93    439       C  
ATOM    271  CD2 LEU A  42      76.635 -15.342  -5.189  1.00 33.06           C  
ANISOU  271  CD2 LEU A  42     4145   3925   4490     17     93    435       C  
ATOM    272  N   LYS A  43      80.041 -17.099  -9.027  1.00 30.05           N  
ANISOU  272  N   LYS A  43     3559   4111   3747   -209    435    722       N  
ATOM    273  CA  LYS A  43      80.000 -18.023 -10.151  1.00 30.40           C  
ANISOU  273  CA  LYS A  43     3614   4346   3589   -210    544    714       C  
ATOM    274  C   LYS A  43      79.370 -19.319  -9.668  1.00 29.81           C  
ANISOU  274  C   LYS A  43     3574   4290   3462    -74    506    552       C  
ATOM    275  O   LYS A  43      79.834 -19.901  -8.681  1.00 29.63           O  
ANISOU  275  O   LYS A  43     3488   4220   3548     -5    472    434       O  
ATOM    276  CB  LYS A  43      81.404 -18.296 -10.709  1.00 29.95           C  
ANISOU  276  CB  LYS A  43     3418   4428   3534   -289    707    677       C  
ATOM    277  CG  LYS A  43      81.977 -17.157 -11.530  1.00 45.01           C  
ANISOU  277  CG  LYS A  43     5298   6373   5432   -466    786    869       C  
ATOM    278  CD  LYS A  43      83.305 -17.555 -12.152  1.00 56.53           C  
ANISOU  278  CD  LYS A  43     6596   8011   6873   -550    991    805       C  
ATOM    279  CE  LYS A  43      83.792 -16.508 -13.131  1.00 61.62           C  
ANISOU  279  CE  LYS A  43     7226   8738   7448   -763   1099   1024       C  
ATOM    280  NZ  LYS A  43      85.070 -16.918 -13.778  1.00 67.75           N  
ANISOU  280  NZ  LYS A  43     7822   9722   8197   -858   1342    938       N  
ATOM    281  N   TRP A  44      78.322 -19.768 -10.357  1.00 26.20           N  
ANISOU  281  N   TRP A  44     3213   3901   2842    -51    495    567       N  
ATOM    282  CA  TRP A  44      77.572 -20.958  -9.970  1.00 23.38           C  
ANISOU  282  CA  TRP A  44     2895   3542   2445     55    453    434       C  
ATOM    283  C   TRP A  44      77.863 -22.099 -10.933  1.00 23.94           C  
ANISOU  283  C   TRP A  44     2952   3763   2381     48    571    316       C  
ATOM    284  O   TRP A  44      77.943 -21.893 -12.147  1.00 27.16           O  
ANISOU  284  O   TRP A  44     3385   4320   2615    -49    657    365       O  
ATOM    285  CB  TRP A  44      76.074 -20.684  -9.952  1.00 22.86           C  
ANISOU  285  CB  TRP A  44     2926   3428   2334     82    342    503       C  
ATOM    286  CG  TRP A  44      75.679 -19.602  -9.034  1.00 27.86           C  
ANISOU  286  CG  TRP A  44     3563   3900   3122    102    253    566       C  
ATOM    287  CD1 TRP A  44      75.747 -18.254  -9.270  1.00 28.32           C  
ANISOU  287  CD1 TRP A  44     3620   3873   3268     41    224    713       C  
ATOM    288  CD2 TRP A  44      75.118 -19.756  -7.731  1.00 24.32           C  
ANISOU  288  CD2 TRP A  44     3123   3349   2769    176    191    470       C  
ATOM    289  NE1 TRP A  44      75.268 -17.563  -8.185  1.00 26.53           N  
ANISOU  289  NE1 TRP A  44     3391   3476   3212     90    155    675       N  
ATOM    290  CE2 TRP A  44      74.879 -18.461  -7.225  1.00 24.63           C  
ANISOU  290  CE2 TRP A  44     3158   3247   2951    165    145    519       C  
ATOM    291  CE3 TRP A  44      74.807 -20.864  -6.933  1.00 25.35           C  
ANISOU  291  CE3 TRP A  44     3263   3491   2876    236    176    351       C  
ATOM    292  CZ2 TRP A  44      74.339 -18.243  -5.960  1.00 24.39           C  
ANISOU  292  CZ2 TRP A  44     3136   3121   3012    209    110    411       C  
ATOM    293  CZ3 TRP A  44      74.267 -20.647  -5.675  1.00 25.44           C  
ANISOU  293  CZ3 TRP A  44     3290   3423   2954    264    130    292       C  
ATOM    294  CH2 TRP A  44      74.034 -19.344  -5.205  1.00 23.71           C  
ANISOU  294  CH2 TRP A  44     3066   3095   2847    250    110    301       C  
ATOM    295  N   GLU A  45      78.005 -23.306 -10.390  1.00 24.40           N  
ANISOU  295  N   GLU A  45     2973   3779   2517    142    573    158       N  
ATOM    296  CA  GLU A  45      78.336 -24.475 -11.192  1.00 21.56           C  
ANISOU  296  CA  GLU A  45     2582   3512   2098    155    694    -11       C  
ATOM    297  C   GLU A  45      77.435 -25.642 -10.818  1.00 21.77           C  
ANISOU  297  C   GLU A  45     2667   3459   2147    235    617   -115       C  
ATOM    298  O   GLU A  45      76.966 -25.745  -9.684  1.00 23.82           O  
ANISOU  298  O   GLU A  45     2947   3589   2514    295    493    -70       O  
ATOM    299  CB  GLU A  45      79.791 -24.908 -10.995  1.00 25.72           C  
ANISOU  299  CB  GLU A  45     2943   4028   2803    195    802   -119       C  
ATOM    300  CG  GLU A  45      80.839 -23.909 -11.415  1.00 38.00           C  
ANISOU  300  CG  GLU A  45     4401   5674   4362     97    911    -40       C  
ATOM    301  CD  GLU A  45      82.232 -24.388 -11.063  1.00 50.23           C  
ANISOU  301  CD  GLU A  45     5742   7197   6147    154    993   -151       C  
ATOM    302  OE1 GLU A  45      82.559 -24.449  -9.858  1.00 53.21           O  
ANISOU  302  OE1 GLU A  45     6054   7436   6729    228    853   -119       O  
ATOM    303  OE2 GLU A  45      82.995 -24.723 -11.989  1.00 58.42           O  
ANISOU  303  OE2 GLU A  45     6672   8364   7163    118   1197   -276       O  
ATOM    304  N   LYS A  46      77.226 -26.543 -11.775  1.00 26.83           N  
ANISOU  304  N   LYS A  46     3333   4181   2679    217    701   -268       N  
ATOM    305  CA  LYS A  46      76.558 -27.811 -11.511  1.00 25.58           C  
ANISOU  305  CA  LYS A  46     3209   3922   2589    280    648   -398       C  
ATOM    306  C   LYS A  46      77.450 -28.931 -12.014  1.00 27.15           C  
ANISOU  306  C   LYS A  46     3316   4107   2893    323    794   -635       C  
ATOM    307  O   LYS A  46      77.802 -28.960 -13.198  1.00 27.29           O  
ANISOU  307  O   LYS A  46     3328   4290   2752    250    952   -766       O  
ATOM    308  CB  LYS A  46      75.185 -27.883 -12.178  1.00 23.14           C  
ANISOU  308  CB  LYS A  46     3021   3694   2077    208    580   -390       C  
ATOM    309  CG  LYS A  46      74.464 -29.193 -11.922  1.00 33.60           C  
ANISOU  309  CG  LYS A  46     4374   4902   3489    246    525   -526       C  
ATOM    310  CD  LYS A  46      73.180 -29.258 -12.724  1.00 42.33           C  
ANISOU  310  CD  LYS A  46     5575   6117   4392    152    455   -536       C  
ATOM    311  CE  LYS A  46      72.397 -30.526 -12.421  1.00 44.90           C  
ANISOU  311  CE  LYS A  46     5921   6310   4829    167    391   -661       C  
ATOM    312  NZ  LYS A  46      73.162 -31.746 -12.762  1.00 51.97           N  
ANISOU  312  NZ  LYS A  46     6780   7121   5847    201    506   -914       N  
ATOM    313  N   ASP A  47      77.800 -29.852 -11.117  1.00 21.18           N  
ANISOU  313  N   ASP A  47     2486   3154   2407    437    742   -690       N  
ATOM    314  CA  ASP A  47      78.719 -30.946 -11.429  1.00 25.89           C  
ANISOU  314  CA  ASP A  47     2955   3668   3215    517    864   -915       C  
ATOM    315  C   ASP A  47      80.003 -30.415 -12.063  1.00 28.35           C  
ANISOU  315  C   ASP A  47     3124   4117   3528    499   1053   -986       C  
ATOM    316  O   ASP A  47      80.523 -30.977 -13.025  1.00 27.61           O  
ANISOU  316  O   ASP A  47     2960   4096   3433    493   1250  -1231       O  
ATOM    317  CB  ASP A  47      78.050 -31.986 -12.332  1.00 28.12           C  
ANISOU  317  CB  ASP A  47     3310   3949   3427    487    932  -1153       C  
ATOM    318  CG  ASP A  47      76.807 -32.604 -11.693  1.00 34.97           C  
ANISOU  318  CG  ASP A  47     4288   4664   4333    491    752  -1085       C  
ATOM    319  OD1 ASP A  47      76.664 -32.523 -10.454  1.00 26.23           O  
ANISOU  319  OD1 ASP A  47     3177   3422   3366    543    601   -888       O  
ATOM    320  OD2 ASP A  47      75.968 -33.169 -12.427  1.00 41.61           O  
ANISOU  320  OD2 ASP A  47     5219   5539   5053    421    764  -1232       O  
ATOM    321  N   GLY A  48      80.503 -29.297 -11.534  1.00 29.66           N  
ANISOU  321  N   GLY A  48     3245   4329   3695    474   1006   -786       N  
ATOM    322  CA  GLY A  48      81.745 -28.713 -11.994  1.00 33.26           C  
ANISOU  322  CA  GLY A  48     3545   4908   4185    438   1172   -814       C  
ATOM    323  C   GLY A  48      81.679 -27.955 -13.305  1.00 36.05           C  
ANISOU  323  C   GLY A  48     3965   5520   4213    276   1346   -824       C  
ATOM    324  O   GLY A  48      82.718 -27.468 -13.767  1.00 41.98           O  
ANISOU  324  O   GLY A  48     4581   6397   4973    216   1515   -844       O  
ATOM    325  N   GLN A  49      80.508 -27.845 -13.926  1.00 29.83           N  
ANISOU  325  N   GLN A  49     3369   4828   3137    187   1302   -795       N  
ATOM    326  CA  GLN A  49      80.361 -27.076 -15.155  1.00 32.99           C  
ANISOU  326  CA  GLN A  49     3854   5489   3191      9   1417   -741       C  
ATOM    327  C   GLN A  49      79.498 -25.839 -14.904  1.00 26.20           C  
ANISOU  327  C   GLN A  49     3127   4633   2196    -64   1229   -428       C  
ATOM    328  O   GLN A  49      78.610 -25.871 -14.047  1.00 33.36           O  
ANISOU  328  O   GLN A  49     4101   5379   3193     15   1034   -340       O  
ATOM    329  CB  GLN A  49      79.726 -27.927 -16.260  1.00 34.32           C  
ANISOU  329  CB  GLN A  49     4151   5713   3175    -40   1434   -901       C  
ATOM    330  CG  GLN A  49      80.477 -29.220 -16.525  1.00 62.98           C  
ANISOU  330  CG  GLN A  49     7673   9255   7002     50   1568  -1196       C  
ATOM    331  CD  GLN A  49      79.554 -30.350 -16.943  1.00 65.38           C  
ANISOU  331  CD  GLN A  49     8087   9503   7252     55   1512  -1386       C  
ATOM    332  OE1 GLN A  49      79.581 -31.439 -16.360  1.00 61.86           O  
ANISOU  332  OE1 GLN A  49     7578   8850   7078    183   1490  -1552       O  
ATOM    333  NE2 GLN A  49      78.728 -30.096 -17.954  1.00 64.64           N  
ANISOU  333  NE2 GLN A  49     8150   9579   6830    -91   1470  -1347       N  
ATOM    334  N   PRO A  50      79.743 -24.738 -15.619  1.00 29.64           N  
ANISOU  334  N   PRO A  50     3588   5236   2438   -215   1291   -254       N  
ATOM    335  CA  PRO A  50      78.974 -23.508 -15.384  1.00 27.01           C  
ANISOU  335  CA  PRO A  50     3358   4856   2050   -269   1106     50       C  
ATOM    336  C   PRO A  50      77.476 -23.757 -15.426  1.00 26.67           C  
ANISOU  336  C   PRO A  50     3455   4783   1895   -246    923     89       C  
ATOM    337  O   PRO A  50      76.960 -24.418 -16.327  1.00 26.34           O  
ANISOU  337  O   PRO A  50     3492   4859   1656   -301    938    -23       O  
ATOM    338  CB  PRO A  50      79.422 -22.589 -16.525  1.00 31.17           C  
ANISOU  338  CB  PRO A  50     3916   5546   2380   -449   1197    207       C  
ATOM    339  CG  PRO A  50      80.790 -23.057 -16.852  1.00 33.48           C  
ANISOU  339  CG  PRO A  50     4068   5902   2751   -455   1427     20       C  
ATOM    340  CD  PRO A  50      80.765 -24.552 -16.662  1.00 31.66           C  
ANISOU  340  CD  PRO A  50     3792   5620   2616   -318   1479   -292       C  
ATOM    341  N   LEU A  51      76.780 -23.230 -14.427  1.00 26.37           N  
ANISOU  341  N   LEU A  51     3438   4556   2025   -163    740    229       N  
ATOM    342  CA  LEU A  51      75.349 -23.455 -14.294  1.00 23.29           C  
ANISOU  342  CA  LEU A  51     3135   4117   1595   -126    571    262       C  
ATOM    343  C   LEU A  51      74.590 -22.731 -15.399  1.00 33.26           C  
ANISOU  343  C   LEU A  51     4488   5534   2615   -257    486    458       C  
ATOM    344  O   LEU A  51      74.787 -21.534 -15.624  1.00 37.95           O  
ANISOU  344  O   LEU A  51     5087   6129   3203   -327    454    691       O  
ATOM    345  CB  LEU A  51      74.878 -22.982 -12.920  1.00 25.88           C  
ANISOU  345  CB  LEU A  51     3441   4225   2169    -16    439    344       C  
ATOM    346  CG  LEU A  51      73.385 -23.063 -12.586  1.00 31.91           C  
ANISOU  346  CG  LEU A  51     4251   4920   2952     31    281    386       C  
ATOM    347  CD1 LEU A  51      72.883 -24.487 -12.754  1.00 30.77           C  
ANISOU  347  CD1 LEU A  51     4131   4813   2746     50    287    196       C  
ATOM    348  CD2 LEU A  51      73.140 -22.576 -11.159  1.00 25.71           C  
ANISOU  348  CD2 LEU A  51     3430   3944   2397    125    214    417       C  
ATOM    349  N   SER A  52      73.738 -23.471 -16.101  1.00 30.69           N  
ANISOU  349  N   SER A  52     4232   5318   2112   -298    429    370       N  
ATOM    350  CA  SER A  52      72.804 -22.913 -17.065  1.00 36.50           C  
ANISOU  350  CA  SER A  52     5042   6112   2713   -388    272    541       C  
ATOM    351  C   SER A  52      71.458 -22.750 -16.373  1.00 43.36           C  
ANISOU  351  C   SER A  52     5897   6875   3702   -307     69    645       C  
ATOM    352  O   SER A  52      70.927 -23.713 -15.810  1.00 38.80           O  
ANISOU  352  O   SER A  52     5304   6265   3174   -239     51    480       O  
ATOM    353  CB  SER A  52      72.678 -23.816 -18.291  1.00 44.47           C  
ANISOU  353  CB  SER A  52     6115   7282   3499   -483    314    365       C  
ATOM    354  OG  SER A  52      71.652 -23.356 -19.151  1.00 56.38           O  
ANISOU  354  OG  SER A  52     7681   8865   4877   -565    130    533       O  
ATOM    355  N   LEU A  53      70.913 -21.535 -16.406  1.00 45.69           N  
ANISOU  355  N   LEU A  53     6182   7092   4086   -310    -80    912       N  
ATOM    356  CA  LEU A  53      69.692 -21.272 -15.654  1.00 43.48           C  
ANISOU  356  CA  LEU A  53     5847   6686   3987   -209   -253   1006       C  
ATOM    357  C   LEU A  53      68.465 -21.845 -16.351  1.00 49.97           C  
ANISOU  357  C   LEU A  53     6681   7596   4710   -250   -402    977       C  
ATOM    358  O   LEU A  53      67.555 -22.353 -15.687  1.00 51.91           O  
ANISOU  358  O   LEU A  53     6869   7798   5057   -178   -483    916       O  
ATOM    359  CB  LEU A  53      69.528 -19.771 -15.424  1.00 37.63           C  
ANISOU  359  CB  LEU A  53     5063   5781   3453   -177   -356   1273       C  
ATOM    360  CG  LEU A  53      70.629 -19.134 -14.574  1.00 38.83           C  
ANISOU  360  CG  LEU A  53     5187   5784   3781   -133   -226   1272       C  
ATOM    361  CD1 LEU A  53      70.402 -17.640 -14.424  1.00 40.72           C  
ANISOU  361  CD1 LEU A  53     5387   5832   4251   -114   -340   1527       C  
ATOM    362  CD2 LEU A  53      70.686 -19.809 -13.220  1.00 31.84           C  
ANISOU  362  CD2 LEU A  53     4255   4766   3076     -3   -143   1023       C  
ATOM    363  N   GLY A  54      68.420 -21.780 -17.678  1.00 45.75           N  
ANISOU  363  N   GLY A  54     6209   7200   3973   -374   -441   1023       N  
ATOM    364  CA  GLY A  54      67.285 -22.280 -18.411  1.00 53.57           C  
ANISOU  364  CA  GLY A  54     7206   8292   4858   -431   -598   1005       C  
ATOM    365  C   GLY A  54      66.003 -21.566 -18.034  1.00 52.30           C  
ANISOU  365  C   GLY A  54     6941   8010   4919   -353   -818   1201       C  
ATOM    366  O   GLY A  54      66.011 -20.411 -17.595  1.00 53.84           O  
ANISOU  366  O   GLY A  54     7080   8050   5328   -281   -864   1397       O  
ATOM    367  N   PRO A  55      64.874 -22.248 -18.181  1.00 54.45           N  
ANISOU  367  N   PRO A  55     7169   8338   5183   -364   -952   1135       N  
ATOM    368  CA  PRO A  55      63.587 -21.584 -17.949  1.00 50.01           C  
ANISOU  368  CA  PRO A  55     6471   7672   4858   -290  -1163   1314       C  
ATOM    369  C   PRO A  55      63.108 -21.685 -16.507  1.00 35.44           C  
ANISOU  369  C   PRO A  55     4495   5669   3302   -142  -1150   1260       C  
ATOM    370  O   PRO A  55      62.293 -20.869 -16.071  1.00 38.42           O  
ANISOU  370  O   PRO A  55     4732   5901   3967    -39  -1263   1400       O  
ATOM    371  CB  PRO A  55      62.651 -22.326 -18.908  1.00 50.85           C  
ANISOU  371  CB  PRO A  55     6579   7945   4796   -400  -1312   1260       C  
ATOM    372  CG  PRO A  55      63.199 -23.726 -18.911  1.00 51.60           C  
ANISOU  372  CG  PRO A  55     6768   8149   4687   -470  -1159    959       C  
ATOM    373  CD  PRO A  55      64.702 -23.607 -18.724  1.00 55.87           C  
ANISOU  373  CD  PRO A  55     7407   8673   5148   -461   -927    893       C  
ATOM    374  N   ASN A  56      63.615 -22.659 -15.751  1.00 34.62           N  
ANISOU  374  N   ASN A  56     4423   5589   3142   -127  -1002   1052       N  
ATOM    375  CA  ASN A  56      63.082 -22.977 -14.431  1.00 33.28           C  
ANISOU  375  CA  ASN A  56     4141   5248   3255     -4   -929    918       C  
ATOM    376  C   ASN A  56      64.008 -22.628 -13.270  1.00 26.94           C  
ANISOU  376  C   ASN A  56     3358   4273   2607    101   -729    842       C  
ATOM    377  O   ASN A  56      63.616 -22.819 -12.116  1.00 27.24           O  
ANISOU  377  O   ASN A  56     3318   4185   2846    185   -651    734       O  
ATOM    378  CB  ASN A  56      62.729 -24.467 -14.360  1.00 40.96           C  
ANISOU  378  CB  ASN A  56     5131   6289   4144    -68   -890    682       C  
ATOM    379  CG  ASN A  56      63.961 -25.365 -14.378  1.00 57.40           C  
ANISOU  379  CG  ASN A  56     7355   8398   6057   -110   -702    481       C  
ATOM    380  OD1 ASN A  56      64.981 -25.025 -14.985  1.00 69.11           O  
ANISOU  380  OD1 ASN A  56     8933   9960   7365   -151   -637    515       O  
ATOM    381  ND2 ASN A  56      63.866 -26.526 -13.726  1.00 52.67           N  
ANISOU  381  ND2 ASN A  56     6754   7726   5533   -104   -615    280       N  
ATOM    382  N   ILE A  57      65.223 -22.151 -13.523  1.00 25.89           N  
ANISOU  382  N   ILE A  57     3320   4147   2369     79   -641    891       N  
ATOM    383  CA  ILE A  57      66.167 -21.838 -12.456  1.00 30.17           C  
ANISOU  383  CA  ILE A  57     3876   4542   3045    156   -476    815       C  
ATOM    384  C   ILE A  57      66.391 -20.334 -12.425  1.00 25.37           C  
ANISOU  384  C   ILE A  57     3236   3813   2592    195   -520   1011       C  
ATOM    385  O   ILE A  57      66.528 -19.698 -13.473  1.00 28.28           O  
ANISOU  385  O   ILE A  57     3638   4252   2854    121   -618   1217       O  
ATOM    386  CB  ILE A  57      67.510 -22.571 -12.629  1.00 33.60           C  
ANISOU  386  CB  ILE A  57     4412   5053   3300    103   -323    680       C  
ATOM    387  CG1 ILE A  57      67.301 -24.078 -12.754  1.00 41.13           C  
ANISOU  387  CG1 ILE A  57     5396   6085   4147     65   -289    479       C  
ATOM    388  CG2 ILE A  57      68.423 -22.261 -11.464  1.00 24.51           C  
ANISOU  388  CG2 ILE A  57     3251   3758   2303    176   -197    616       C  
ATOM    389  CD1 ILE A  57      68.600 -24.850 -12.928  1.00 46.08           C  
ANISOU  389  CD1 ILE A  57     6088   6754   4665     38   -134    321       C  
ATOM    390  N   GLU A  58      66.445 -19.767 -11.220  1.00 26.87           N  
ANISOU  390  N   GLU A  58     3367   3816   3024    295   -447    948       N  
ATOM    391  CA  GLU A  58      66.724 -18.350 -11.057  1.00 30.92           C  
ANISOU  391  CA  GLU A  58     3849   4162   3738    334   -472   1086       C  
ATOM    392  C   GLU A  58      67.644 -18.133  -9.865  1.00 27.85           C  
ANISOU  392  C   GLU A  58     3480   3655   3447    369   -320    930       C  
ATOM    393  O   GLU A  58      67.637 -18.904  -8.901  1.00 21.84           O  
ANISOU  393  O   GLU A  58     2719   2907   2672    398   -226    735       O  
ATOM    394  CB  GLU A  58      65.432 -17.538 -10.880  1.00 25.81           C  
ANISOU  394  CB  GLU A  58     3061   3367   3380    431   -598   1177       C  
ATOM    395  CG  GLU A  58      64.686 -17.820  -9.588  1.00 44.27           C  
ANISOU  395  CG  GLU A  58     5298   5620   5902    528   -505    956       C  
ATOM    396  CD  GLU A  58      63.376 -17.055  -9.501  1.00 54.18           C  
ANISOU  396  CD  GLU A  58     6370   6737   7477    634   -610   1021       C  
ATOM    397  OE1 GLU A  58      63.100 -16.249 -10.419  1.00 60.38           O  
ANISOU  397  OE1 GLU A  58     7111   7461   8369    642   -786   1267       O  
ATOM    398  OE2 GLU A  58      62.617 -17.270  -8.528  1.00 51.79           O  
ANISOU  398  OE2 GLU A  58     5958   6394   7326    703   -517    837       O  
ATOM    399  N  AILE A  59      68.451 -17.079  -9.952  0.75 24.93           N  
ANISOU  399  N  AILE A  59     3128   3175   3169    344   -312   1034       N  
ATOM    400  N  BILE A  59      68.431 -17.064  -9.938  0.25 24.36           N  
ANISOU  400  N  BILE A  59     3053   3099   3102    346   -313   1034       N  
ATOM    401  CA AILE A  59      69.304 -16.630  -8.859  0.75 19.96           C  
ANISOU  401  CA AILE A  59     2504   2419   2662    360   -205    900       C  
ATOM    402  CA BILE A  59      69.305 -16.638  -8.852  0.25 22.29           C  
ANISOU  402  CA BILE A  59     2798   2714   2955    360   -204    898       C  
ATOM    403  C  AILE A  59      68.724 -15.335  -8.319  0.75 24.02           C  
ANISOU  403  C  AILE A  59     2936   2687   3501    435   -247    917       C  
ATOM    404  C  BILE A  59      68.777 -15.319  -8.312  0.25 23.80           C  
ANISOU  404  C  BILE A  59     2912   2659   3473    432   -244    917       C  
ATOM    405  O  AILE A  59      68.433 -14.412  -9.091  0.75 24.39           O  
ANISOU  405  O  AILE A  59     2952   2625   3692    435   -360   1135       O  
ATOM    406  O  BILE A  59      68.573 -14.367  -9.076  0.25 25.40           O  
ANISOU  406  O  BILE A  59     3087   2748   3817    426   -352   1135       O  
ATOM    407  CB AILE A  59      70.756 -16.417  -9.315  0.75 26.42           C  
ANISOU  407  CB AILE A  59     3382   3282   3374    258   -149    971       C  
ATOM    408  CB BILE A  59      70.762 -16.493  -9.321  0.25 25.39           C  
ANISOU  408  CB BILE A  59     3254   3163   3230    257   -146    965       C  
ATOM    409  CG1AILE A  59      71.255 -17.618 -10.127  0.75 27.73           C  
ANISOU  409  CG1AILE A  59     3605   3685   3247    190   -100    955       C  
ATOM    410  CG1BILE A  59      71.244 -17.792  -9.968  0.25 26.53           C  
ANISOU  410  CG1BILE A  59     3452   3538   3091    200    -89    918       C  
ATOM    411  CG2AILE A  59      71.650 -16.114  -8.108  0.75 22.55           C  
ANISOU  411  CG2AILE A  59     2885   2687   2995    260    -63    809       C  
ATOM    412  CG2BILE A  59      71.656 -16.097  -8.155  0.25 23.82           C  
ANISOU  412  CG2BILE A  59     3046   2849   3154    258    -65    817       C  
ATOM    413  CD1AILE A  59      71.814 -18.738  -9.294  0.75 25.76           C  
ANISOU  413  CD1AILE A  59     3364   3495   2930    216     -2    738       C  
ATOM    414  CD1BILE A  59      72.566 -17.654 -10.674  0.25 26.56           C  
ANISOU  414  CD1BILE A  59     3484   3631   2977     93    -13    991       C  
ATOM    415  N   ILE A  60      68.559 -15.262  -7.001  1.00 25.66           N  
ANISOU  415  N   ILE A  60     3111   2806   3831    492   -157    688       N  
ATOM    416  CA  ILE A  60      67.976 -14.100  -6.346  1.00 27.53           C  
ANISOU  416  CA  ILE A  60     3258   2802   4399    572   -156    615       C  
ATOM    417  C   ILE A  60      68.999 -13.498  -5.392  1.00 29.28           C  
ANISOU  417  C   ILE A  60     3523   2914   4687    525    -69    453       C  
ATOM    418  O   ILE A  60      69.634 -14.217  -4.612  1.00 28.14           O  
ANISOU  418  O   ILE A  60     3440   2903   4350    473     13    294       O  
ATOM    419  CB  ILE A  60      66.678 -14.466  -5.610  1.00 30.08           C  
ANISOU  419  CB  ILE A  60     3481   3136   4811    665   -106    441       C  
ATOM    420  CG1 ILE A  60      65.660 -15.009  -6.611  1.00 34.45           C  
ANISOU  420  CG1 ILE A  60     3971   3793   5327    696   -224    612       C  
ATOM    421  CG2 ILE A  60      66.107 -13.251  -4.906  1.00 34.17           C  
ANISOU  421  CG2 ILE A  60     3886   3396   5701    757    -68    308       C  
ATOM    422  CD1 ILE A  60      64.511 -15.741  -5.963  1.00 38.66           C  
ANISOU  422  CD1 ILE A  60     4406   4409   5873    747   -159    448       C  
ATOM    423  N   HIS A  61      69.166 -12.186  -5.472  1.00 24.05           N  
ANISOU  423  N   HIS A  61     2825   2002   4313    533   -109    509       N  
ATOM    424  CA  HIS A  61      70.014 -11.423  -4.569  1.00 25.17           C  
ANISOU  424  CA  HIS A  61     2991   1996   4578    479    -44    332       C  
ATOM    425  C   HIS A  61      69.098 -10.567  -3.705  1.00 26.33           C  
ANISOU  425  C   HIS A  61     3043   1910   5050    579      6    108       C  
ATOM    426  O   HIS A  61      68.291  -9.797  -4.231  1.00 31.36           O  
ANISOU  426  O   HIS A  61     3582   2334   6000    675    -68    227       O  
ATOM    427  CB  HIS A  61      70.996 -10.562  -5.365  1.00 28.66           C  
ANISOU  427  CB  HIS A  61     3460   2303   5127    385   -117    556       C  
ATOM    428  CG  HIS A  61      72.007  -9.844  -4.526  1.00 38.13           C  
ANISOU  428  CG  HIS A  61     4680   3366   6442    296    -69    385       C  
ATOM    429  ND1 HIS A  61      72.399 -10.289  -3.282  1.00 35.42           N  
ANISOU  429  ND1 HIS A  61     4370   3131   5958    262     17     88       N  
ATOM    430  CD2 HIS A  61      72.716  -8.714  -4.764  1.00 38.71           C  
ANISOU  430  CD2 HIS A  61     4746   3206   6755    213   -111    480       C  
ATOM    431  CE1 HIS A  61      73.302  -9.461  -2.786  1.00 40.33           C  
ANISOU  431  CE1 HIS A  61     5000   3605   6719    163     18    -14       C  
ATOM    432  NE2 HIS A  61      73.512  -8.497  -3.665  1.00 41.10           N  
ANISOU  432  NE2 HIS A  61     5070   3481   7066    133    -52    212       N  
ATOM    433  N   GLU A  62      69.185 -10.735  -2.390  1.00 30.88           N  
ANISOU  433  N   GLU A  62     3640   2540   5553    557    132   -216       N  
ATOM    434  CA  GLU A  62      68.467  -9.885  -1.448  1.00 40.50           C  
ANISOU  434  CA  GLU A  62     4774   3556   7059    627    229   -509       C  
ATOM    435  C   GLU A  62      69.441  -9.361  -0.404  1.00 37.76           C  
ANISOU  435  C   GLU A  62     4502   3155   6691    510    295   -772       C  
ATOM    436  O   GLU A  62      70.560  -9.856  -0.272  1.00 36.59           O  
ANISOU  436  O   GLU A  62     4455   3174   6275    384    263   -731       O  
ATOM    437  CB  GLU A  62      67.322 -10.634  -0.758  1.00 45.33           C  
ANISOU  437  CB  GLU A  62     5323   4335   7566    695    352   -704       C  
ATOM    438  CG  GLU A  62      66.484 -11.469  -1.700  1.00 52.50           C  
ANISOU  438  CG  GLU A  62     6172   5377   8399    767    276   -461       C  
ATOM    439  CD  GLU A  62      65.175 -11.919  -1.075  1.00 68.79           C  
ANISOU  439  CD  GLU A  62     8115   7532  10491    842    400   -649       C  
ATOM    440  OE1 GLU A  62      64.106 -11.630  -1.656  1.00 73.72           O  
ANISOU  440  OE1 GLU A  62     8578   8043  11390    967    348   -556       O  
ATOM    441  OE2 GLU A  62      65.216 -12.572  -0.009  1.00 73.86           O  
ANISOU  441  OE2 GLU A  62     8814   8369  10881    765    543   -871       O  
ATOM    442  N   GLY A  63      69.008  -8.342   0.329  1.00 57.19           N  
ANISOU  442  N   GLY A  63     6896   5375   9459    551    380  -1058       N  
ATOM    443  CA  GLY A  63      69.796  -7.781   1.410  1.00 67.50           C  
ANISOU  443  CA  GLY A  63     8270   6629  10750    426    445  -1373       C  
ATOM    444  C   GLY A  63      71.212  -7.452   0.983  1.00 75.07           C  
ANISOU  444  C   GLY A  63     9305   7529  11688    290    319  -1198       C  
ATOM    445  O   GLY A  63      71.502  -7.195  -0.189  1.00 79.53           O  
ANISOU  445  O   GLY A  63     9851   7976  12392    305    203   -857       O  
ATOM    446  N   LEU A  64      72.122  -7.478   1.953  1.00 71.59           N  
ANISOU  446  N   LEU A  64     8946   7200  11053    136    340  -1426       N  
ATOM    447  CA  LEU A  64      73.512  -7.153   1.665  1.00 65.67           C  
ANISOU  447  CA  LEU A  64     8238   6406  10307    -10    228  -1295       C  
ATOM    448  C   LEU A  64      74.295  -8.351   1.147  1.00 58.64           C  
ANISOU  448  C   LEU A  64     7391   5827   9062    -63    155  -1020       C  
ATOM    449  O   LEU A  64      75.044  -8.225   0.172  1.00 58.04           O  
ANISOU  449  O   LEU A  64     7297   5706   9050   -106     76   -740       O  
ATOM    450  CB  LEU A  64      74.192  -6.594   2.916  1.00 67.78           C  
ANISOU  450  CB  LEU A  64     8553   6648  10551   -168    250  -1665       C  
ATOM    451  CG  LEU A  64      75.640  -6.141   2.740  1.00 64.77           C  
ANISOU  451  CG  LEU A  64     8185   6201  10225   -340    129  -1572       C  
ATOM    452  CD1 LEU A  64      75.719  -5.018   1.718  1.00 63.88           C  
ANISOU  452  CD1 LEU A  64     8005   5700  10564   -317     78  -1363       C  
ATOM    453  CD2 LEU A  64      76.219  -5.699   4.074  1.00 69.61           C  
ANISOU  453  CD2 LEU A  64     8848   6837  10764   -512    132  -1972       C  
ATOM    454  N   ASP A  65      74.128  -9.516   1.773  1.00 47.01           N  
ANISOU  454  N   ASP A  65     5967   4663   7233    -66    190  -1094       N  
ATOM    455  CA  ASP A  65      74.943 -10.679   1.462  1.00 40.50           C  
ANISOU  455  CA  ASP A  65     5172   4104   6114   -113    121   -889       C  
ATOM    456  C   ASP A  65      74.130 -11.908   1.081  1.00 29.36           C  
ANISOU  456  C   ASP A  65     3770   2888   4499     -5    154   -754       C  
ATOM    457  O   ASP A  65      74.712 -12.981   0.906  1.00 32.35           O  
ANISOU  457  O   ASP A  65     4168   3470   4652    -29    108   -620       O  
ATOM    458  CB  ASP A  65      75.852 -11.020   2.654  1.00 53.88           C  
ANISOU  458  CB  ASP A  65     6917   5981   7575   -261     74  -1069       C  
ATOM    459  CG  ASP A  65      75.130 -10.948   3.988  1.00 70.55           C  
ANISOU  459  CG  ASP A  65     9086   8167   9554   -295    159  -1399       C  
ATOM    460  OD1 ASP A  65      73.984 -11.447   4.081  1.00 78.96           O  
ANISOU  460  OD1 ASP A  65    10155   9306  10540   -197    260  -1429       O  
ATOM    461  OD2 ASP A  65      75.719 -10.406   4.951  1.00 72.30           O  
ANISOU  461  OD2 ASP A  65     9343   8393   9733   -439    130  -1638       O  
ATOM    462  N   TYR A  66      72.814 -11.785   0.936  1.00 28.28           N  
ANISOU  462  N   TYR A  66     3599   2677   4469    113    227   -792       N  
ATOM    463  CA  TYR A  66      71.939 -12.938   0.782  1.00 24.87           C  
ANISOU  463  CA  TYR A  66     3168   2432   3850    190    264   -718       C  
ATOM    464  C   TYR A  66      71.702 -13.254  -0.691  1.00 30.19           C  
ANISOU  464  C   TYR A  66     3806   3089   4576    270    202   -420       C  
ATOM    465  O   TYR A  66      71.318 -12.378  -1.472  1.00 31.45           O  
ANISOU  465  O   TYR A  66     3909   3049   4991    329    170   -311       O  
ATOM    466  CB  TYR A  66      70.615 -12.674   1.491  1.00 26.67           C  
ANISOU  466  CB  TYR A  66     3351   2621   4163    257    387   -944       C  
ATOM    467  CG  TYR A  66      69.621 -13.810   1.436  1.00 38.17           C  
ANISOU  467  CG  TYR A  66     4788   4262   5452    314    436   -887       C  
ATOM    468  CD1 TYR A  66      69.588 -14.783   2.428  1.00 43.85           C  
ANISOU  468  CD1 TYR A  66     5574   5221   5865    229    492   -986       C  
ATOM    469  CD2 TYR A  66      68.694 -13.892   0.398  1.00 43.22           C  
ANISOU  469  CD2 TYR A  66     5339   4835   6246    433    410   -717       C  
ATOM    470  CE1 TYR A  66      68.663 -15.811   2.382  1.00 51.08           C  
ANISOU  470  CE1 TYR A  66     6467   6284   6657    260    540   -923       C  
ATOM    471  CE2 TYR A  66      67.771 -14.909   0.340  1.00 50.71           C  
ANISOU  471  CE2 TYR A  66     6257   5942   7068    467    447   -677       C  
ATOM    472  CZ  TYR A  66      67.759 -15.870   1.331  1.00 57.89           C  
ANISOU  472  CZ  TYR A  66     7231   7067   7696    380    521   -783       C  
ATOM    473  OH  TYR A  66      66.833 -16.885   1.272  1.00 61.61           O  
ANISOU  473  OH  TYR A  66     7666   7677   8066    393    560   -730       O  
ATOM    474  N   TYR A  67      71.917 -14.514  -1.056  1.00 22.90           N  
ANISOU  474  N   TYR A  67     2917   2374   3412    263    178   -291       N  
ATOM    475  CA  TYR A  67      71.648 -15.035  -2.390  1.00 22.70           C  
ANISOU  475  CA  TYR A  67     2875   2395   3356    314    133    -58       C  
ATOM    476  C   TYR A  67      70.846 -16.321  -2.257  1.00 27.66           C  
ANISOU  476  C   TYR A  67     3513   3194   3803    351    159    -72       C  
ATOM    477  O   TYR A  67      71.060 -17.109  -1.332  1.00 31.17           O  
ANISOU  477  O   TYR A  67     4000   3763   4080    307    188   -175       O  
ATOM    478  CB  TYR A  67      72.943 -15.324  -3.167  1.00 20.27           C  
ANISOU  478  CB  TYR A  67     2590   2158   2955    246     90     98       C  
ATOM    479  CG  TYR A  67      73.757 -14.098  -3.469  1.00 24.54           C  
ANISOU  479  CG  TYR A  67     3109   2536   3679    182     64    160       C  
ATOM    480  CD1 TYR A  67      74.636 -13.564  -2.529  1.00 24.85           C  
ANISOU  480  CD1 TYR A  67     3150   2517   3776    100     64     14       C  
ATOM    481  CD2 TYR A  67      73.646 -13.465  -4.698  1.00 28.81           C  
ANISOU  481  CD2 TYR A  67     3629   2985   4331    181     26    381       C  
ATOM    482  CE1 TYR A  67      75.382 -12.427  -2.818  1.00 29.46           C  
ANISOU  482  CE1 TYR A  67     3705   2929   4557     21     38     72       C  
ATOM    483  CE2 TYR A  67      74.382 -12.339  -4.995  1.00 28.57           C  
ANISOU  483  CE2 TYR A  67     3580   2790   4485    100      2    473       C  
ATOM    484  CZ  TYR A  67      75.250 -11.826  -4.059  1.00 35.45           C  
ANISOU  484  CZ  TYR A  67     4444   3581   5445     22     14    311       C  
ATOM    485  OH  TYR A  67      75.975 -10.701  -4.378  1.00 39.64           O  
ANISOU  485  OH  TYR A  67     4947   3927   6186    -77    -12    407       O  
ATOM    486  N   ALA A  68      69.911 -16.528  -3.178  1.00 26.34           N  
ANISOU  486  N   ALA A  68     3303   3030   3674    417    130     48       N  
ATOM    487  CA  ALA A  68      69.129 -17.754  -3.195  1.00 23.54           C  
ANISOU  487  CA  ALA A  68     2948   2820   3175    435    144     45       C  
ATOM    488  C   ALA A  68      69.130 -18.350  -4.592  1.00 24.57           C  
ANISOU  488  C   ALA A  68     3088   3027   3220    436     71    225       C  
ATOM    489  O   ALA A  68      69.090 -17.627  -5.590  1.00 32.28           O  
ANISOU  489  O   ALA A  68     4043   3940   4283    446      6    371       O  
ATOM    490  CB  ALA A  68      67.682 -17.521  -2.734  1.00 20.22           C  
ANISOU  490  CB  ALA A  68     2436   2359   2885    498    193    -53       C  
ATOM    491  N  ALEU A  69      69.162 -19.678  -4.646  0.40 25.63           N  
ANISOU  491  N  ALEU A  69     3260   3295   3182    411     79    213       N  
ATOM    492  N  BLEU A  69      69.219 -19.673  -4.655  0.60 25.75           N  
ANISOU  492  N  BLEU A  69     3279   3311   3196    410     79    215       N  
ATOM    493  CA ALEU A  69      69.079 -20.445  -5.882  0.40 24.46           C  
ANISOU  493  CA ALEU A  69     3129   3242   2923    397     30    314       C  
ATOM    494  CA BLEU A  69      69.068 -20.423  -5.892  0.60 24.31           C  
ANISOU  494  CA BLEU A  69     3109   3221   2906    398     29    316       C  
ATOM    495  C  ALEU A  69      67.759 -21.209  -5.856  0.40 23.38           C  
ANISOU  495  C  ALEU A  69     2951   3156   2776    413     13    283       C  
ATOM    496  C  BLEU A  69      67.737 -21.158  -5.818  0.60 23.15           C  
ANISOU  496  C  BLEU A  69     2920   3122   2755    415     14    282       C  
ATOM    497  O  ALEU A  69      67.589 -22.137  -5.058  0.40 24.71           O  
ANISOU  497  O  ALEU A  69     3137   3365   2889    393     59    196       O  
ATOM    498  O  BLEU A  69      67.546 -22.018  -4.953  0.60 25.06           O  
ANISOU  498  O  BLEU A  69     3175   3400   2947    397     63    190       O  
ATOM    499  CB ALEU A  69      70.270 -21.393  -6.006  0.40 25.37           C  
ANISOU  499  CB ALEU A  69     3302   3434   2903    356     59    290       C  
ATOM    500  CB BLEU A  69      70.223 -21.403  -6.094  0.60 25.48           C  
ANISOU  500  CB BLEU A  69     3315   3451   2914    356     56    296       C  
ATOM    501  CG ALEU A  69      70.228 -22.404  -7.150  0.40 27.79           C  
ANISOU  501  CG ALEU A  69     3633   3845   3082    332     44    313       C  
ATOM    502  CG BLEU A  69      70.394 -22.027  -7.483  0.60 27.64           C  
ANISOU  502  CG BLEU A  69     3613   3827   3063    325     39    353       C  
ATOM    503  CD1ALEU A  69      70.084 -21.683  -8.464  0.40 27.71           C  
ANISOU  503  CD1ALEU A  69     3622   3877   3029    303     -2    442       C  
ATOM    504  CD1BLEU A  69      71.834 -22.457  -7.682  0.60 29.06           C  
ANISOU  504  CD1BLEU A  69     3809   4046   3186    298    100    319       C  
ATOM    505  CD2ALEU A  69      71.475 -23.280  -7.149  0.40 27.90           C  
ANISOU  505  CD2ALEU A  69     3669   3893   3038    317     96    251       C  
ATOM    506  CD2BLEU A  69      69.467 -23.217  -7.677  0.60 25.22           C  
ANISOU  506  CD2BLEU A  69     3312   3580   2692    321     15    297       C  
ATOM    507  N   HIS A  70      66.828 -20.818  -6.720  1.00 21.93           N  
ANISOU  507  N   HIS A  70     2706   2970   2656    435    -68    377       N  
ATOM    508  CA  HIS A  70      65.476 -21.356  -6.726  1.00 21.69           C  
ANISOU  508  CA  HIS A  70     2595   2981   2666    446   -100    355       C  
ATOM    509  C   HIS A  70      65.258 -22.164  -7.996  1.00 20.10           C  
ANISOU  509  C   HIS A  70     2421   2898   2318    390   -197    426       C  
ATOM    510  O   HIS A  70      65.531 -21.678  -9.098  1.00 22.53           O  
ANISOU  510  O   HIS A  70     2755   3242   2564    367   -281    554       O  
ATOM    511  CB  HIS A  70      64.459 -20.208  -6.623  1.00 26.97           C  
ANISOU  511  CB  HIS A  70     3127   3544   3578    524   -139    392       C  
ATOM    512  CG  HIS A  70      63.055 -20.651  -6.360  1.00 40.85           C  
ANISOU  512  CG  HIS A  70     4751   5336   5434    542   -142    339       C  
ATOM    513  ND1 HIS A  70      62.109 -20.753  -7.358  1.00 44.03           N  
ANISOU  513  ND1 HIS A  70     5058   5786   5884    544   -289    454       N  
ATOM    514  CD2 HIS A  70      62.428 -21.001  -5.211  1.00 44.32           C  
ANISOU  514  CD2 HIS A  70     5124   5788   5930    542    -15    190       C  
ATOM    515  CE1 HIS A  70      60.963 -21.154  -6.836  1.00 46.92           C  
ANISOU  515  CE1 HIS A  70     5284   6176   6366    553   -252    371       C  
ATOM    516  NE2 HIS A  70      61.129 -21.310  -5.535  1.00 43.47           N  
ANISOU  516  NE2 HIS A  70     4865   5722   5931    549    -71    210       N  
ATOM    517  N   ILE A  71      64.764 -23.390  -7.843  1.00 26.54           N  
ANISOU  517  N   ILE A  71     3237   3778   3070    348   -184    342       N  
ATOM    518  CA  ILE A  71      64.346 -24.217  -8.969  1.00 25.06           C  
ANISOU  518  CA  ILE A  71     3064   3697   2760    279   -279    357       C  
ATOM    519  C   ILE A  71      62.868 -24.528  -8.809  1.00 26.74           C  
ANISOU  519  C   ILE A  71     3148   3926   3086    269   -339    346       C  
ATOM    520  O   ILE A  71      62.441 -25.004  -7.752  1.00 28.85           O  
ANISOU  520  O   ILE A  71     3370   4156   3435    267   -249    261       O  
ATOM    521  CB  ILE A  71      65.153 -25.522  -9.065  1.00 24.18           C  
ANISOU  521  CB  ILE A  71     3058   3618   2510    222   -218    244       C  
ATOM    522  CG1 ILE A  71      66.642 -25.259  -8.869  1.00 25.69           C  
ANISOU  522  CG1 ILE A  71     3328   3777   2656    248   -130    233       C  
ATOM    523  CG2 ILE A  71      64.922 -26.192 -10.406  1.00 24.24           C  
ANISOU  523  CG2 ILE A  71     3101   3743   2366    137   -303    220       C  
ATOM    524  CD1 ILE A  71      67.472 -26.511  -9.009  1.00 20.16           C  
ANISOU  524  CD1 ILE A  71     2694   3081   1884    218    -72    117       C  
ATOM    525  N   ARG A  72      62.092 -24.270  -9.856  1.00 25.07           N  
ANISOU  525  N   ARG A  72     2869   3786   2871    245   -497    444       N  
ATOM    526  CA  ARG A  72      60.709 -24.714  -9.915  1.00 32.65           C  
ANISOU  526  CA  ARG A  72     3686   4787   3935    213   -584    432       C  
ATOM    527  C   ARG A  72      60.568 -25.784 -10.992  1.00 30.51           C  
ANISOU  527  C   ARG A  72     3478   4644   3471     86   -693    392       C  
ATOM    528  O   ARG A  72      61.430 -25.930 -11.863  1.00 29.45           O  
ANISOU  528  O   ARG A  72     3483   4584   3122     34   -713    392       O  
ATOM    529  CB  ARG A  72      59.760 -23.536 -10.176  1.00 35.99           C  
ANISOU  529  CB  ARG A  72     3930   5176   4567    291   -714    576       C  
ATOM    530  CG  ARG A  72      60.092 -22.686 -11.394  1.00 43.07           C  
ANISOU  530  CG  ARG A  72     4874   6115   5377    286   -886    774       C  
ATOM    531  CD  ARG A  72      58.971 -21.677 -11.662  1.00 48.56           C  
ANISOU  531  CD  ARG A  72     5358   6752   6341    366  -1064    945       C  
ATOM    532  NE  ARG A  72      57.677 -22.348 -11.698  1.00 55.08           N  
ANISOU  532  NE  ARG A  72     6009   7650   7268    330  -1156    899       N  
ATOM    533  CZ  ARG A  72      57.129 -22.847 -12.801  1.00 62.03           C  
ANISOU  533  CZ  ARG A  72     6873   8689   8007    217  -1375    981       C  
ATOM    534  NH1 ARG A  72      57.755 -22.730 -13.969  1.00 64.02           N  
ANISOU  534  NH1 ARG A  72     7285   9064   7976    125  -1511   1112       N  
ATOM    535  NH2 ARG A  72      55.953 -23.460 -12.735  1.00 57.20           N  
ANISOU  535  NH2 ARG A  72     6080   8133   7522    175  -1454    926       N  
ATOM    536  N   ASP A  73      59.477 -26.548 -10.910  1.00 26.43           N  
ANISOU  536  N   ASP A  73     2853   4157   3034     21   -748    334       N  
ATOM    537  CA  ASP A  73      59.238 -27.663 -11.826  1.00 28.57           C  
ANISOU  537  CA  ASP A  73     3176   4531   3149   -120   -851    248       C  
ATOM    538  C   ASP A  73      60.479 -28.547 -11.943  1.00 21.99           C  
ANISOU  538  C   ASP A  73     2539   3675   2140   -162   -730    104       C  
ATOM    539  O   ASP A  73      60.926 -28.874 -13.043  1.00 24.30           O  
ANISOU  539  O   ASP A  73     2938   4074   2221   -242   -788     47       O  
ATOM    540  CB  ASP A  73      58.824 -27.163 -13.216  1.00 37.08           C  
ANISOU  540  CB  ASP A  73     4231   5764   4092   -180  -1083    370       C  
ATOM    541  CG  ASP A  73      57.541 -26.348 -13.206  1.00 55.75           C  
ANISOU  541  CG  ASP A  73     6363   8135   6684   -129  -1247    529       C  
ATOM    542  OD1 ASP A  73      56.818 -26.359 -12.184  1.00 61.36           O  
ANISOU  542  OD1 ASP A  73     6910   8751   7655    -69  -1161    491       O  
ATOM    543  OD2 ASP A  73      57.262 -25.694 -14.239  1.00 57.76           O  
ANISOU  543  OD2 ASP A  73     6589   8497   6859   -156  -1465    700       O  
ATOM    544  N  ATHR A  74      61.046 -28.923 -10.792  0.70 24.25           N  
ANISOU  544  N  ATHR A  74     2865   3829   2521   -110   -562     44       N  
ATOM    545  N  BTHR A  74      61.035 -28.933 -10.799  0.30 25.28           N  
ANISOU  545  N  BTHR A  74     2994   3960   2650   -111   -563     43       N  
ATOM    546  CA ATHR A  74      62.295 -29.681 -10.795  0.70 26.99           C  
ANISOU  546  CA ATHR A  74     3362   4119   2774   -115   -455    -72       C  
ATOM    547  CA BTHR A  74      62.307 -29.644 -10.795  0.30 26.26           C  
ANISOU  547  CA BTHR A  74     3269   4027   2680   -113   -455    -68       C  
ATOM    548  C  ATHR A  74      62.140 -30.973 -11.581  0.70 27.73           C  
ANISOU  548  C  ATHR A  74     3508   4230   2799   -236   -502   -237       C  
ATOM    549  C  BTHR A  74      62.182 -30.998 -11.492  0.30 26.87           C  
ANISOU  549  C  BTHR A  74     3400   4109   2699   -231   -492   -238       C  
ATOM    550  O  ATHR A  74      61.087 -31.617 -11.561  0.70 25.06           O  
ANISOU  550  O  ATHR A  74     3094   3884   2544   -325   -578   -275       O  
ATOM    551  O  BTHR A  74      61.184 -31.707 -11.337  0.30 26.63           O  
ANISOU  551  O  BTHR A  74     3297   4051   2768   -314   -551   -278       O  
ATOM    552  CB ATHR A  74      62.762 -30.019  -9.375  0.70 26.14           C  
ANISOU  552  CB ATHR A  74     3270   3867   2796    -62   -318    -78       C  
ATOM    553  CB BTHR A  74      62.798 -29.819  -9.358  0.30 25.06           C  
ANISOU  553  CB BTHR A  74     3128   3736   2655    -49   -316    -61       C  
ATOM    554  OG1ATHR A  74      61.707 -30.676  -8.660  0.70 21.03           O  
ANISOU  554  OG1ATHR A  74     2537   3174   2281   -127   -318    -82       O  
ATOM    555  OG1BTHR A  74      62.537 -28.618  -8.618  0.30 25.45           O  
ANISOU  555  OG1BTHR A  74     3101   3785   2784     32   -286     49       O  
ATOM    556  CG2ATHR A  74      63.205 -28.768  -8.627  0.70 22.87           C  
ANISOU  556  CG2ATHR A  74     2838   3437   2416     44   -252     27       C  
ATOM    557  CG2BTHR A  74      64.280 -30.081  -9.339  0.30 22.54           C  
ANISOU  557  CG2BTHR A  74     2926   3361   2277     -4   -228   -118       C  
ATOM    558  N   LEU A  75      63.199 -31.343 -12.279  1.00 25.69           N  
ANISOU  558  N   LEU A  75     3367   3991   2403   -247   -447   -358       N  
ATOM    559  CA  LEU A  75      63.259 -32.560 -13.059  1.00 29.55           C  
ANISOU  559  CA  LEU A  75     3920   4478   2832   -353   -457   -578       C  
ATOM    560  C   LEU A  75      64.351 -33.473 -12.519  1.00 26.36           C  
ANISOU  560  C   LEU A  75     3577   3883   2554   -296   -313   -710       C  
ATOM    561  O   LEU A  75      65.318 -32.999 -11.912  1.00 25.03           O  
ANISOU  561  O   LEU A  75     3422   3660   2427   -183   -216   -632       O  
ATOM    562  CB  LEU A  75      63.547 -32.231 -14.532  1.00 28.62           C  
ANISOU  562  CB  LEU A  75     3873   4577   2423   -433   -504   -648       C  
ATOM    563  CG  LEU A  75      62.559 -31.329 -15.266  1.00 34.64           C  
ANISOU  563  CG  LEU A  75     4581   5542   3038   -502   -696   -482       C  
ATOM    564  CD1 LEU A  75      63.074 -31.025 -16.663  1.00 43.63           C  
ANISOU  564  CD1 LEU A  75     5825   6916   3836   -603   -724   -525       C  
ATOM    565  CD2 LEU A  75      61.187 -31.981 -15.333  1.00 33.28           C  
ANISOU  565  CD2 LEU A  75     4316   5374   2955   -611   -853   -526       C  
ATOM    566  N   PRO A  76      64.239 -34.791 -12.727  1.00 25.52           N  
ANISOU  566  N   PRO A  76     3497   3655   2544   -371   -310   -908       N  
ATOM    567  CA  PRO A  76      65.344 -35.687 -12.339  1.00 29.36           C  
ANISOU  567  CA  PRO A  76     4025   3930   3200   -300   -191  -1035       C  
ATOM    568  C   PRO A  76      66.711 -35.192 -12.786  1.00 30.11           C  
ANISOU  568  C   PRO A  76     4157   4097   3187   -208    -69  -1094       C  
ATOM    569  O   PRO A  76      67.676 -35.294 -12.022  1.00 33.22           O  
ANISOU  569  O   PRO A  76     4534   4346   3741    -93     11  -1050       O  
ATOM    570  CB  PRO A  76      64.966 -37.011 -13.017  1.00 30.79           C  
ANISOU  570  CB  PRO A  76     4235   4010   3455   -418   -220  -1300       C  
ATOM    571  CG  PRO A  76      63.477 -36.969 -13.077  1.00 34.65           C  
ANISOU  571  CG  PRO A  76     4670   4582   3914   -550   -368  -1226       C  
ATOM    572  CD  PRO A  76      63.105 -35.530 -13.308  1.00 26.79           C  
ANISOU  572  CD  PRO A  76     3637   3840   2703   -525   -430  -1027       C  
ATOM    573  N   GLU A  77      66.801 -34.608 -13.984  1.00 27.18           N  
ANISOU  573  N   GLU A  77     3824   3963   2538   -270    -62  -1167       N  
ATOM    574  CA  GLU A  77      68.057 -34.086 -14.515  1.00 32.89           C  
ANISOU  574  CA  GLU A  77     4572   4794   3131   -218     76  -1218       C  
ATOM    575  C   GLU A  77      68.673 -32.998 -13.638  1.00 35.24           C  
ANISOU  575  C   GLU A  77     4827   5076   3485    -98    106   -969       C  
ATOM    576  O   GLU A  77      69.877 -32.741 -13.746  1.00 35.53           O  
ANISOU  576  O   GLU A  77     4852   5129   3518    -36    234  -1005       O  
ATOM    577  CB  GLU A  77      67.830 -33.528 -15.923  1.00 36.60           C  
ANISOU  577  CB  GLU A  77     5102   5567   3237   -352     52  -1269       C  
ATOM    578  CG  GLU A  77      67.431 -34.558 -16.971  1.00 46.02           C  
ANISOU  578  CG  GLU A  77     6354   6830   4303   -499     41  -1579       C  
ATOM    579  CD  GLU A  77      65.932 -34.805 -17.029  1.00 50.84           C  
ANISOU  579  CD  GLU A  77     6953   7461   4904   -613   -170  -1531       C  
ATOM    580  OE1 GLU A  77      65.209 -34.364 -16.115  1.00 47.28           O  
ANISOU  580  OE1 GLU A  77     6429   6924   4610   -557   -277  -1282       O  
ATOM    581  OE2 GLU A  77      65.475 -35.460 -17.987  1.00 52.57           O  
ANISOU  581  OE2 GLU A  77     7220   7764   4992   -753   -220  -1732       O  
ATOM    582  N   ASP A  78      67.878 -32.339 -12.794  1.00 33.62           N  
ANISOU  582  N   ASP A  78     4589   4847   3339    -75      2   -741       N  
ATOM    583  CA  ASP A  78      68.394 -31.290 -11.920  1.00 32.27           C  
ANISOU  583  CA  ASP A  78     4384   4653   3222     21     27   -542       C  
ATOM    584  C   ASP A  78      69.167 -31.839 -10.732  1.00 25.00           C  
ANISOU  584  C   ASP A  78     3437   3534   2527    115     82   -537       C  
ATOM    585  O   ASP A  78      69.824 -31.060 -10.037  1.00 22.24           O  
ANISOU  585  O   ASP A  78     3065   3172   2214    183    108   -414       O  
ATOM    586  CB  ASP A  78      67.250 -30.407 -11.412  1.00 30.81           C  
ANISOU  586  CB  ASP A  78     4159   4504   3044     16    -82   -348       C  
ATOM    587  CG  ASP A  78      66.650 -29.544 -12.510  1.00 40.38           C  
ANISOU  587  CG  ASP A  78     5375   5906   4062    -52   -173   -268       C  
ATOM    588  OD1 ASP A  78      67.427 -28.905 -13.254  1.00 46.69           O  
ANISOU  588  OD1 ASP A  78     6213   6819   4708    -66   -128   -240       O  
ATOM    589  OD2 ASP A  78      65.406 -29.518 -12.638  1.00 31.75           O  
ANISOU  589  OD2 ASP A  78     4235   4853   2976   -103   -297   -218       O  
ATOM    590  N   THR A  79      69.069 -33.137 -10.462  1.00 20.97           N  
ANISOU  590  N   THR A  79     2929   2860   2179    108     76   -649       N  
ATOM    591  CA  THR A  79      69.895 -33.769  -9.441  1.00 23.61           C  
ANISOU  591  CA  THR A  79     3237   2996   2739    191     97   -618       C  
ATOM    592  C   THR A  79      71.367 -33.505  -9.719  1.00 21.74           C  
ANISOU  592  C   THR A  79     2960   2772   2527    278    197   -681       C  
ATOM    593  O   THR A  79      71.820 -33.611 -10.861  1.00 26.58           O  
ANISOU  593  O   THR A  79     3572   3473   3052    262    291   -864       O  
ATOM    594  CB  THR A  79      69.643 -35.282  -9.433  1.00 27.37           C  
ANISOU  594  CB  THR A  79     3719   3267   3414    163     74   -749       C  
ATOM    595  OG1 THR A  79      68.296 -35.547  -9.026  1.00 25.66           O  
ANISOU  595  OG1 THR A  79     3517   3031   3201     66    -14   -665       O  
ATOM    596  CG2 THR A  79      70.619 -35.999  -8.501  1.00 28.70           C  
ANISOU  596  CG2 THR A  79     3848   3207   3851    258     69   -694       C  
ATOM    597  N   GLY A  80      72.113 -33.159  -8.679  1.00 21.19           N  
ANISOU  597  N   GLY A  80     2849   2636   2565    352    180   -538       N  
ATOM    598  CA  GLY A  80      73.552 -33.046  -8.800  1.00 27.77           C  
ANISOU  598  CA  GLY A  80     3606   3454   3491    436    259   -590       C  
ATOM    599  C   GLY A  80      74.128 -32.138  -7.730  1.00 24.58           C  
ANISOU  599  C   GLY A  80     3168   3068   3104    474    209   -396       C  
ATOM    600  O   GLY A  80      73.437 -31.723  -6.800  1.00 21.63           O  
ANISOU  600  O   GLY A  80     2840   2701   2678    439    124   -242       O  
ATOM    601  N   TYR A  81      75.416 -31.838  -7.894  1.00 20.54           N  
ANISOU  601  N   TYR A  81     2564   2575   2666    532    275   -430       N  
ATOM    602  CA  TYR A  81      76.173 -31.024  -6.949  1.00 20.20           C  
ANISOU  602  CA  TYR A  81     2469   2546   2661    557    220   -278       C  
ATOM    603  C   TYR A  81      76.249 -29.594  -7.471  1.00 20.10           C  
ANISOU  603  C   TYR A  81     2470   2708   2460    502    285   -243       C  
ATOM    604  O   TYR A  81      76.742 -29.357  -8.582  1.00 28.68           O  
ANISOU  604  O   TYR A  81     3521   3896   3482    485    410   -342       O  
ATOM    605  CB  TYR A  81      77.575 -31.599  -6.730  1.00 19.12           C  
ANISOU  605  CB  TYR A  81     2185   2302   2777    651    225   -318       C  
ATOM    606  CG  TYR A  81      77.550 -32.983  -6.122  1.00 28.81           C  
ANISOU  606  CG  TYR A  81     3389   3308   4248    712    125   -303       C  
ATOM    607  CD1 TYR A  81      77.397 -34.105  -6.923  1.00 22.23           C  
ANISOU  607  CD1 TYR A  81     2542   2355   3551    749    198   -494       C  
ATOM    608  CD2 TYR A  81      77.642 -33.167  -4.745  1.00 31.18           C  
ANISOU  608  CD2 TYR A  81     3693   3518   4635    715    -52    -94       C  
ATOM    609  CE1 TYR A  81      77.351 -35.371  -6.378  1.00 31.82           C  
ANISOU  609  CE1 TYR A  81     3735   3320   5037    801     95   -465       C  
ATOM    610  CE2 TYR A  81      77.608 -34.443  -4.191  1.00 25.79           C  
ANISOU  610  CE2 TYR A  81     2996   2617   4187    756   -166    -28       C  
ATOM    611  CZ  TYR A  81      77.461 -35.537  -5.015  1.00 27.44           C  
ANISOU  611  CZ  TYR A  81     3179   2664   4581    806    -94   -208       C  
ATOM    612  OH  TYR A  81      77.405 -36.808  -4.492  1.00 40.56           O  
ANISOU  612  OH  TYR A  81     4825   4062   6524    844   -215   -132       O  
ATOM    613  N   TYR A  82      75.760 -28.655  -6.671  1.00 23.52           N  
ANISOU  613  N   TYR A  82     2955   3172   2811    465    208   -105       N  
ATOM    614  CA  TYR A  82      75.730 -27.238  -7.007  1.00 20.13           C  
ANISOU  614  CA  TYR A  82     2540   2848   2261    415    241    -44       C  
ATOM    615  C   TYR A  82      76.804 -26.520  -6.206  1.00 26.92           C  
ANISOU  615  C   TYR A  82     3328   3691   3209    418    210     20       C  
ATOM    616  O   TYR A  82      76.830 -26.617  -4.975  1.00 25.19           O  
ANISOU  616  O   TYR A  82     3116   3414   3041    425    109     75       O  
ATOM    617  CB  TYR A  82      74.351 -26.652  -6.711  1.00 17.13           C  
ANISOU  617  CB  TYR A  82     2246   2485   1779    378    184     26       C  
ATOM    618  CG  TYR A  82      73.294 -27.159  -7.659  1.00 19.46           C  
ANISOU  618  CG  TYR A  82     2589   2825   1980    352    195    -23       C  
ATOM    619  CD1 TYR A  82      72.721 -28.414  -7.494  1.00 24.15           C  
ANISOU  619  CD1 TYR A  82     3203   3353   2618    358    167    -88       C  
ATOM    620  CD2 TYR A  82      72.897 -26.392  -8.745  1.00 22.67           C  
ANISOU  620  CD2 TYR A  82     3019   3339   2257    304    214      9       C  
ATOM    621  CE1 TYR A  82      71.756 -28.878  -8.379  1.00 29.27           C  
ANISOU  621  CE1 TYR A  82     3888   4049   3184    314    161   -152       C  
ATOM    622  CE2 TYR A  82      71.933 -26.842  -9.626  1.00 25.64           C  
ANISOU  622  CE2 TYR A  82     3435   3782   2527    262    191    -31       C  
ATOM    623  CZ  TYR A  82      71.365 -28.082  -9.435  1.00 29.47           C  
ANISOU  623  CZ  TYR A  82     3933   4207   3057    265    166   -128       C  
ATOM    624  OH  TYR A  82      70.415 -28.516 -10.326  1.00 27.30           O  
ANISOU  624  OH  TYR A  82     3690   4005   2677    202    128   -184       O  
ATOM    625  N   ARG A  83      77.683 -25.798  -6.895  1.00 21.93           N  
ANISOU  625  N   ARG A  83     2629   3126   2579    391    293     15       N  
ATOM    626  CA  ARG A  83      78.796 -25.116  -6.247  1.00 20.19           C  
ANISOU  626  CA  ARG A  83     2315   2892   2464    376    263     62       C  
ATOM    627  C   ARG A  83      78.681 -23.612  -6.461  1.00 21.63           C  
ANISOU  627  C   ARG A  83     2530   3109   2580    295    281    140       C  
ATOM    628  O   ARG A  83      78.299 -23.151  -7.543  1.00 22.48           O  
ANISOU  628  O   ARG A  83     2677   3281   2582    251    358    169       O  
ATOM    629  CB  ARG A  83      80.154 -25.638  -6.776  1.00 21.14           C  
ANISOU  629  CB  ARG A  83     2274   3033   2726    409    353    -14       C  
ATOM    630  CG  ARG A  83      81.364 -24.875  -6.215  1.00 23.00           C  
ANISOU  630  CG  ARG A  83     2377   3270   3090    375    317     38       C  
ATOM    631  CD  ARG A  83      82.695 -25.492  -6.629  1.00 29.64           C  
ANISOU  631  CD  ARG A  83     3011   4126   4126    424    404    -45       C  
ATOM    632  NE  ARG A  83      82.853 -26.856  -6.136  1.00 32.30           N  
ANISOU  632  NE  ARG A  83     3285   4353   4635    542    325    -93       N  
ATOM    633  CZ  ARG A  83      83.175 -27.173  -4.885  1.00 32.83           C  
ANISOU  633  CZ  ARG A  83     3307   4333   4835    578    127     -2       C  
ATOM    634  NH1 ARG A  83      83.366 -26.220  -3.981  1.00 25.20           N  
ANISOU  634  NH1 ARG A  83     2358   3397   3819    496     -1    100       N  
ATOM    635  NH2 ARG A  83      83.294 -28.449  -4.533  1.00 32.37           N  
ANISOU  635  NH2 ARG A  83     3192   4150   4957    683     44    -10       N  
ATOM    636  N   VAL A  84      79.010 -22.836  -5.435  1.00 18.39           N  
ANISOU  636  N   VAL A  84     2104   2648   2234    262    196    179       N  
ATOM    637  CA  VAL A  84      79.102 -21.392  -5.591  1.00 22.46           C  
ANISOU  637  CA  VAL A  84     2627   3147   2759    182    210    239       C  
ATOM    638  C   VAL A  84      80.496 -20.935  -5.180  1.00 25.63           C  
ANISOU  638  C   VAL A  84     2901   3542   3294    129    192    240       C  
ATOM    639  O   VAL A  84      81.069 -21.433  -4.204  1.00 24.37           O  
ANISOU  639  O   VAL A  84     2683   3371   3206    149     95    206       O  
ATOM    640  CB  VAL A  84      77.996 -20.653  -4.808  1.00 23.19           C  
ANISOU  640  CB  VAL A  84     2824   3163   2825    175    139    244       C  
ATOM    641  CG1 VAL A  84      78.105 -20.922  -3.305  1.00 29.11           C  
ANISOU  641  CG1 VAL A  84     3584   3892   3586    174     38    182       C  
ATOM    642  CG2 VAL A  84      78.040 -19.164  -5.117  1.00 31.01           C  
ANISOU  642  CG2 VAL A  84     3816   4083   3886    105    152    306       C  
ATOM    643  N   THR A  85      81.049 -19.996  -5.946  1.00 27.64           N  
ANISOU  643  N   THR A  85     3104   3811   3586     44    271    301       N  
ATOM    644  CA  THR A  85      82.378 -19.452  -5.697  1.00 25.00           C  
ANISOU  644  CA  THR A  85     2625   3475   3399    -34    267    308       C  
ATOM    645  C   THR A  85      82.277 -17.935  -5.651  1.00 27.71           C  
ANISOU  645  C   THR A  85     3009   3722   3797   -145    247    379       C  
ATOM    646  O   THR A  85      81.801 -17.315  -6.606  1.00 27.45           O  
ANISOU  646  O   THR A  85     3037   3679   3714   -190    320    482       O  
ATOM    647  CB  THR A  85      83.365 -19.899  -6.777  1.00 32.01           C  
ANISOU  647  CB  THR A  85     3366   4476   4321    -51    422    306       C  
ATOM    648  OG1 THR A  85      83.368 -21.331  -6.847  1.00 25.89           O  
ANISOU  648  OG1 THR A  85     2553   3744   3541     70    445    210       O  
ATOM    649  CG2 THR A  85      84.779 -19.401  -6.461  1.00 29.83           C  
ANISOU  649  CG2 THR A  85     2895   4205   4235   -134    416    311       C  
ATOM    650  N   ALA A  86      82.709 -17.346  -4.540  1.00 24.18           N  
ANISOU  650  N   ALA A  86     2532   3197   3459   -200    133    327       N  
ATOM    651  CA  ALA A  86      82.687 -15.904  -4.347  1.00 28.67           C  
ANISOU  651  CA  ALA A  86     3129   3628   4135   -310    103    352       C  
ATOM    652  C   ALA A  86      84.111 -15.374  -4.435  1.00 28.80           C  
ANISOU  652  C   ALA A  86     2977   3652   4313   -440    113    380       C  
ATOM    653  O   ALA A  86      85.016 -15.922  -3.799  1.00 30.87           O  
ANISOU  653  O   ALA A  86     3112   3986   4630   -443     43    314       O  
ATOM    654  CB  ALA A  86      82.060 -15.545  -2.999  1.00 29.08           C  
ANISOU  654  CB  ALA A  86     3277   3587   4184   -303    -19    220       C  
ATOM    655  N   THR A  87      84.304 -14.304  -5.213  1.00 29.30           N  
ANISOU  655  N   THR A  87     3028   3638   4469   -556    186    499       N  
ATOM    656  CA  THR A  87      85.630 -13.784  -5.518  1.00 26.75           C  
ANISOU  656  CA  THR A  87     2528   3333   4302   -706    233    556       C  
ATOM    657  C   THR A  87      85.632 -12.265  -5.448  1.00 30.99           C  
ANISOU  657  C   THR A  87     3099   3661   5016   -857    194    621       C  
ATOM    658  O   THR A  87      84.680 -11.615  -5.885  1.00 33.45           O  
ANISOU  658  O   THR A  87     3548   3839   5322   -848    204    718       O  
ATOM    659  CB  THR A  87      86.101 -14.213  -6.920  1.00 35.93           C  
ANISOU  659  CB  THR A  87     3602   4662   5389   -736    429    678       C  
ATOM    660  OG1 THR A  87      85.928 -15.623  -7.085  1.00 37.68           O  
ANISOU  660  OG1 THR A  87     3812   5036   5469   -583    477    591       O  
ATOM    661  CG2 THR A  87      87.579 -13.868  -7.127  1.00 40.40           C  
ANISOU  661  CG2 THR A  87     3935   5286   6128   -888    502    709       C  
ATOM    662  N   ASN A  88      86.706 -11.708  -4.893  1.00 34.25           N  
ANISOU  662  N   ASN A  88     3372   4026   5615   -996    133    571       N  
ATOM    663  CA  ASN A  88      87.023 -10.295  -5.051  1.00 37.54           C  
ANISOU  663  CA  ASN A  88     3772   4241   6252  -1181    125    655       C  
ATOM    664  C   ASN A  88      88.544 -10.175  -5.111  1.00 45.16           C  
ANISOU  664  C   ASN A  88     4495   5291   7374  -1345    152    675       C  
ATOM    665  O   ASN A  88      89.263 -11.178  -5.114  1.00 34.18           O  
ANISOU  665  O   ASN A  88     2946   4110   5930  -1291    186    629       O  
ATOM    666  CB  ASN A  88      86.387  -9.444  -3.940  1.00 37.79           C  
ANISOU  666  CB  ASN A  88     3927   4031   6399  -1190    -24    490       C  
ATOM    667  CG  ASN A  88      86.922  -9.768  -2.550  1.00 42.14           C  
ANISOU  667  CG  ASN A  88     4422   4645   6945  -1208   -176    250       C  
ATOM    668  OD1 ASN A  88      87.904 -10.495  -2.389  1.00 45.97           O  
ANISOU  668  OD1 ASN A  88     4742   5316   7407  -1226   -204    240       O  
ATOM    669  ND2 ASN A  88      86.285  -9.191  -1.532  1.00 34.82           N  
ANISOU  669  ND2 ASN A  88     3620   3564   6047  -1212   -279     53       N  
ATOM    670  N   THR A  89      89.047  -8.942  -5.145  1.00 44.43           N  
ANISOU  670  N   THR A  89     4350   5016   7515  -1548    133    740       N  
ATOM    671  CA  THR A  89      90.485  -8.759  -5.266  1.00 47.17           C  
ANISOU  671  CA  THR A  89     4441   5445   8038  -1730    169    773       C  
ATOM    672  C   THR A  89      91.258  -9.309  -4.072  1.00 49.34           C  
ANISOU  672  C   THR A  89     4562   5818   8367  -1715      1    559       C  
ATOM    673  O   THR A  89      92.469  -9.518  -4.186  1.00 50.96           O  
ANISOU  673  O   THR A  89     4504   6154   8705  -1812     29    576       O  
ATOM    674  CB  THR A  89      90.814  -7.277  -5.456  1.00 53.18           C  
ANISOU  674  CB  THR A  89     5185   5953   9068  -1973    159    886       C  
ATOM    675  OG1 THR A  89      90.295  -6.523  -4.353  1.00 60.64           O  
ANISOU  675  OG1 THR A  89     6261   6637  10142  -1984    -29    699       O  
ATOM    676  CG2 THR A  89      90.203  -6.764  -6.752  1.00 44.92           C  
ANISOU  676  CG2 THR A  89     4261   4834   7973  -2016    308   1174       C  
ATOM    677  N   ALA A  90      90.601  -9.562  -2.941  1.00 47.99           N  
ANISOU  677  N   ALA A  90     4536   5605   8095  -1605   -173    372       N  
ATOM    678  CA  ALA A  90      91.311 -10.010  -1.751  1.00 42.21           C  
ANISOU  678  CA  ALA A  90     3679   4975   7383  -1623   -376    203       C  
ATOM    679  C   ALA A  90      91.375 -11.526  -1.604  1.00 45.16           C  
ANISOU  679  C   ALA A  90     3989   5579   7592  -1426   -397    194       C  
ATOM    680  O   ALA A  90      92.178 -12.013  -0.802  1.00 54.01           O  
ANISOU  680  O   ALA A  90     4946   6810   8764  -1444   -571    124       O  
ATOM    681  CB  ALA A  90      90.673  -9.410  -0.495  1.00 39.97           C  
ANISOU  681  CB  ALA A  90     3583   4547   7057  -1661   -561     -9       C  
ATOM    682  N   GLY A  91      90.562 -12.281  -2.331  1.00 39.94           N  
ANISOU  682  N   GLY A  91     3444   4978   6753  -1247   -250    267       N  
ATOM    683  CA  GLY A  91      90.600 -13.724  -2.211  1.00 38.23           C  
ANISOU  683  CA  GLY A  91     3169   4932   6425  -1063   -270    251       C  
ATOM    684  C   GLY A  91      89.361 -14.371  -2.803  1.00 42.72           C  
ANISOU  684  C   GLY A  91     3945   5514   6773   -888   -145    286       C  
ATOM    685  O   GLY A  91      88.563 -13.728  -3.485  1.00 38.25           O  
ANISOU  685  O   GLY A  91     3535   4854   6144   -907    -29    351       O  
ATOM    686  N   SER A  92      89.233 -15.672  -2.531  1.00 43.91           N  
ANISOU  686  N   SER A  92     4081   5771   6831   -724   -190    255       N  
ATOM    687  CA  SER A  92      88.129 -16.477  -3.034  1.00 41.33           C  
ANISOU  687  CA  SER A  92     3923   5468   6312   -562    -91    270       C  
ATOM    688  C   SER A  92      87.690 -17.472  -1.969  1.00 35.45           C  
ANISOU  688  C   SER A  92     3255   4753   5461   -443   -263    211       C  
ATOM    689  O   SER A  92      88.467 -17.858  -1.093  1.00 35.56           O  
ANISOU  689  O   SER A  92     3139   4813   5561   -457   -441    193       O  
ATOM    690  CB  SER A  92      88.509 -17.238  -4.313  1.00 49.20           C  
ANISOU  690  CB  SER A  92     4793   6575   7327   -490    123    315       C  
ATOM    691  OG  SER A  92      88.990 -16.358  -5.309  1.00 62.95           O  
ANISOU  691  OG  SER A  92     6457   8330   9132   -633    294    397       O  
ATOM    692  N   THR A  93      86.431 -17.899  -2.068  1.00 32.66           N  
ANISOU  692  N   THR A  93     3106   4381   4923   -340   -220    205       N  
ATOM    693  CA  THR A  93      85.894 -18.931  -1.193  1.00 32.98           C  
ANISOU  693  CA  THR A  93     3232   4453   4845   -240   -350    181       C  
ATOM    694  C   THR A  93      84.760 -19.644  -1.918  1.00 31.79           C  
ANISOU  694  C   THR A  93     3219   4299   4559   -116   -220    196       C  
ATOM    695  O   THR A  93      84.032 -19.040  -2.713  1.00 30.04           O  
ANISOU  695  O   THR A  93     3099   4042   4273   -128    -90    210       O  
ATOM    696  CB  THR A  93      85.408 -18.350   0.143  1.00 36.69           C  
ANISOU  696  CB  THR A  93     3845   4900   5195   -327   -512    109       C  
ATOM    697  OG1 THR A  93      85.043 -19.419   1.026  1.00 42.15           O  
ANISOU  697  OG1 THR A  93     4603   5656   5755   -263   -645    126       O  
ATOM    698  CG2 THR A  93      84.201 -17.438  -0.068  1.00 34.98           C  
ANISOU  698  CG2 THR A  93     3818   4588   4885   -346   -406     54       C  
ATOM    699  N   SER A  94      84.614 -20.937  -1.639  1.00 26.11           N  
ANISOU  699  N   SER A  94     2496   3609   3815     -5   -277    208       N  
ATOM    700  CA  SER A  94      83.696 -21.764  -2.408  1.00 27.30           C  
ANISOU  700  CA  SER A  94     2741   3756   3875    103   -158    206       C  
ATOM    701  C   SER A  94      83.063 -22.812  -1.502  1.00 26.52           C  
ANISOU  701  C   SER A  94     2734   3644   3697    168   -287    225       C  
ATOM    702  O   SER A  94      83.690 -23.294  -0.555  1.00 24.10           O  
ANISOU  702  O   SER A  94     2357   3346   3455    164   -459    270       O  
ATOM    703  CB  SER A  94      84.429 -22.431  -3.580  1.00 35.33           C  
ANISOU  703  CB  SER A  94     3598   4808   5019    169     -9    187       C  
ATOM    704  OG  SER A  94      83.541 -23.160  -4.401  1.00 39.30           O  
ANISOU  704  OG  SER A  94     4202   5315   5416    247    107    153       O  
ATOM    705  N   CYS A  95      81.810 -23.158  -1.796  1.00 24.46           N  
ANISOU  705  N   CYS A  95     2626   3368   3300    212   -217    213       N  
ATOM    706  CA  CYS A  95      81.140 -24.261  -1.117  1.00 30.21           C  
ANISOU  706  CA  CYS A  95     3437   4078   3964    260   -305    248       C  
ATOM    707  C   CYS A  95      80.186 -24.938  -2.090  1.00 24.65           C  
ANISOU  707  C   CYS A  95     2803   3349   3215    332   -177    217       C  
ATOM    708  O   CYS A  95      79.815 -24.371  -3.120  1.00 28.71           O  
ANISOU  708  O   CYS A  95     3343   3885   3681    325    -44    177       O  
ATOM    709  CB  CYS A  95      80.384 -23.793   0.133  1.00 30.67           C  
ANISOU  709  CB  CYS A  95     3637   4170   3847    173   -400    253       C  
ATOM    710  SG  CYS A  95      78.976 -22.722  -0.193  1.00 30.43           S  
ANISOU  710  SG  CYS A  95     3748   4130   3683    142   -262    171       S  
ATOM    711  N   GLN A  96      79.789 -26.165  -1.753  1.00 23.17           N  
ANISOU  711  N   GLN A  96     2648   3114   3042    384   -237    250       N  
ATOM    712  CA  GLN A  96      78.855 -26.888  -2.605  1.00 21.78           C  
ANISOU  712  CA  GLN A  96     2538   2907   2832    433   -137    203       C  
ATOM    713  C   GLN A  96      77.890 -27.712  -1.764  1.00 23.12           C  
ANISOU  713  C   GLN A  96     2813   3036   2935    419   -223    267       C  
ATOM    714  O   GLN A  96      78.137 -28.002  -0.589  1.00 24.09           O  
ANISOU  714  O   GLN A  96     2947   3153   3055    383   -364    367       O  
ATOM    715  CB  GLN A  96      79.592 -27.780  -3.616  1.00 23.30           C  
ANISOU  715  CB  GLN A  96     2608   3050   3195    521    -56    126       C  
ATOM    716  CG  GLN A  96      80.148 -29.081  -3.066  1.00 34.88           C  
ANISOU  716  CG  GLN A  96     3989   4392   4870    598   -169    167       C  
ATOM    717  CD  GLN A  96      80.500 -30.066  -4.175  1.00 41.71           C  
ANISOU  717  CD  GLN A  96     4757   5177   5913    695    -46     24       C  
ATOM    718  OE1 GLN A  96      80.397 -29.747  -5.362  1.00 41.32           O  
ANISOU  718  OE1 GLN A  96     4711   5210   5779    682    131   -109       O  
ATOM    719  NE2 GLN A  96      80.920 -31.265  -3.792  1.00 43.45           N  
ANISOU  719  NE2 GLN A  96     4891   5234   6383    783   -142     50       N  
ATOM    720  N   ALA A  97      76.775 -28.083  -2.393  1.00 23.67           N  
ANISOU  720  N   ALA A  97     2960   3095   2940    425   -143    221       N  
ATOM    721  CA  ALA A  97      75.779 -28.959  -1.793  1.00 25.49           C  
ANISOU  721  CA  ALA A  97     3274   3282   3129    397   -194    278       C  
ATOM    722  C   ALA A  97      75.139 -29.804  -2.886  1.00 27.95           C  
ANISOU  722  C   ALA A  97     3596   3534   3490    433   -116    193       C  
ATOM    723  O   ALA A  97      75.226 -29.491  -4.077  1.00 23.43           O  
ANISOU  723  O   ALA A  97     2998   3002   2903    459    -16     86       O  
ATOM    724  CB  ALA A  97      74.705 -28.167  -1.039  1.00 20.98           C  
ANISOU  724  CB  ALA A  97     2797   2800   2375    311   -181    298       C  
ATOM    725  N   HIS A  98      74.475 -30.874  -2.463  1.00 20.98           N  
ANISOU  725  N   HIS A  98     2758   2565   2647    410   -170    245       N  
ATOM    726  CA  HIS A  98      73.835 -31.814  -3.369  1.00 23.10           C  
ANISOU  726  CA  HIS A  98     3040   2753   2984    423   -120    150       C  
ATOM    727  C   HIS A  98      72.323 -31.625  -3.359  1.00 24.24           C  
ANISOU  727  C   HIS A  98     3259   2966   2986    339    -92    154       C  
ATOM    728  O   HIS A  98      71.715 -31.440  -2.301  1.00 19.55           O  
ANISOU  728  O   HIS A  98     2707   2413   2309    270   -127    261       O  
ATOM    729  CB  HIS A  98      74.173 -33.253  -2.976  1.00 20.91           C  
ANISOU  729  CB  HIS A  98     2739   2280   2927    451   -209    205       C  
ATOM    730  CG  HIS A  98      73.672 -34.276  -3.944  1.00 27.43           C  
ANISOU  730  CG  HIS A  98     3568   2986   3868    462   -157     61       C  
ATOM    731  ND1 HIS A  98      72.530 -35.016  -3.723  1.00 29.33           N  
ANISOU  731  ND1 HIS A  98     3874   3154   4114    378   -190    102       N  
ATOM    732  CD2 HIS A  98      74.159 -34.683  -5.141  1.00 28.81           C  
ANISOU  732  CD2 HIS A  98     3687   3111   4150    529    -65   -146       C  
ATOM    733  CE1 HIS A  98      72.340 -35.842  -4.738  1.00 31.06           C  
ANISOU  733  CE1 HIS A  98     4082   3265   4454    393   -141    -78       C  
ATOM    734  NE2 HIS A  98      73.314 -35.658  -5.612  1.00 30.73           N  
ANISOU  734  NE2 HIS A  98     3972   3243   4461    485    -59   -244       N  
ATOM    735  N   LEU A  99      71.724 -31.680  -4.541  1.00 19.68           N  
ANISOU  735  N   LEU A  99     2685   2419   2375    336    -29     31       N  
ATOM    736  CA  LEU A  99      70.279 -31.727  -4.695  1.00 23.10           C  
ANISOU  736  CA  LEU A  99     3149   2897   2730    262    -24     25       C  
ATOM    737  C   LEU A  99      69.892 -33.121  -5.163  1.00 16.58           C  
ANISOU  737  C   LEU A  99     2332   1942   2025    232    -44    -50       C  
ATOM    738  O   LEU A  99      70.435 -33.615  -6.155  1.00 23.77           O  
ANISOU  738  O   LEU A  99     3228   2805   2998    271    -11   -197       O  
ATOM    739  CB  LEU A  99      69.785 -30.685  -5.704  1.00 19.93           C  
ANISOU  739  CB  LEU A  99     2738   2634   2199    260     19    -34       C  
ATOM    740  CG  LEU A  99      68.308 -30.813  -6.108  1.00 23.71           C  
ANISOU  740  CG  LEU A  99     3212   3161   2636    191     -2    -53       C  
ATOM    741  CD1 LEU A  99      67.394 -30.554  -4.915  1.00 23.90           C  
ANISOU  741  CD1 LEU A  99     3219   3200   2664    147     -4     43       C  
ATOM    742  CD2 LEU A  99      67.940 -29.882  -7.275  1.00 18.22           C  
ANISOU  742  CD2 LEU A  99     2501   2595   1827    191     -6    -79       C  
ATOM    743  N   GLN A 100      68.955 -33.747  -4.458  1.00 21.18           N  
ANISOU  743  N   GLN A 100     2934   2469   2645    148    -83     32       N  
ATOM    744  CA  GLN A 100      68.382 -35.029  -4.860  1.00 20.73           C  
ANISOU  744  CA  GLN A 100     2885   2270   2722     89   -111    -34       C  
ATOM    745  C   GLN A 100      66.929 -34.790  -5.262  1.00 26.53           C  
ANISOU  745  C   GLN A 100     3602   3116   3361     -7   -103    -69       C  
ATOM    746  O   GLN A 100      66.110 -34.393  -4.433  1.00 24.11           O  
ANISOU  746  O   GLN A 100     3277   2887   2996    -70    -94     47       O  
ATOM    747  CB  GLN A 100      68.467 -36.055  -3.734  1.00 19.51           C  
ANISOU  747  CB  GLN A 100     2750   1937   2724     42   -179    126       C  
ATOM    748  CG  GLN A 100      67.965 -37.435  -4.142  1.00 21.34           C  
ANISOU  748  CG  GLN A 100     2987   1964   3157    -24   -215     58       C  
ATOM    749  CD  GLN A 100      68.822 -38.050  -5.242  1.00 33.55           C  
ANISOU  749  CD  GLN A 100     4513   3368   4865     72   -196   -166       C  
ATOM    750  OE1 GLN A 100      70.044 -38.116  -5.122  1.00 36.49           O  
ANISOU  750  OE1 GLN A 100     4855   3656   5353    188   -200   -164       O  
ATOM    751  NE2 GLN A 100      68.187 -38.492  -6.316  1.00 36.79           N  
ANISOU  751  NE2 GLN A 100     4927   3766   5284     15   -171   -377       N  
ATOM    752  N   VAL A 101      66.616 -35.006  -6.532  1.00 26.60           N  
ANISOU  752  N   VAL A 101     3604   3152   3348    -25   -106   -238       N  
ATOM    753  CA  VAL A 101      65.243 -34.935  -7.017  1.00 25.23           C  
ANISOU  753  CA  VAL A 101     3393   3075   3117   -125   -140   -271       C  
ATOM    754  C   VAL A 101      64.667 -36.345  -6.993  1.00 24.19           C  
ANISOU  754  C   VAL A 101     3264   2770   3155   -233   -183   -324       C  
ATOM    755  O   VAL A 101      65.190 -37.247  -7.655  1.00 33.77           O  
ANISOU  755  O   VAL A 101     4512   3844   4473   -228   -190   -484       O  
ATOM    756  CB  VAL A 101      65.186 -34.326  -8.426  1.00 27.62           C  
ANISOU  756  CB  VAL A 101     3695   3537   3264   -117   -155   -401       C  
ATOM    757  CG1 VAL A 101      63.750 -34.069  -8.842  1.00 19.81           C  
ANISOU  757  CG1 VAL A 101     2638   2668   2222   -212   -231   -390       C  
ATOM    758  CG2 VAL A 101      65.979 -33.022  -8.466  1.00 24.38           C  
ANISOU  758  CG2 VAL A 101     3290   3244   2728    -16   -111   -331       C  
ATOM    759  N   GLU A 102      63.609 -36.549  -6.213  1.00 28.02           N  
ANISOU  759  N   GLU A 102     3703   3253   3690   -338   -196   -203       N  
ATOM    760  CA  GLU A 102      63.059 -37.885  -6.015  1.00 31.76           C  
ANISOU  760  CA  GLU A 102     4175   3538   4352   -467   -237   -206       C  
ATOM    761  C   GLU A 102      61.868 -38.134  -6.938  1.00 29.40           C  
ANISOU  761  C   GLU A 102     3811   3304   4054   -589   -294   -341       C  
ATOM    762  O   GLU A 102      61.116 -37.219  -7.280  1.00 25.41           O  
ANISOU  762  O   GLU A 102     3229   3009   3418   -596   -309   -335       O  
ATOM    763  CB  GLU A 102      62.655 -38.092  -4.551  1.00 29.37           C  
ANISOU  763  CB  GLU A 102     3861   3198   4100   -550   -209     30       C  
ATOM    764  CG  GLU A 102      63.824 -37.958  -3.563  1.00 27.63           C  
ANISOU  764  CG  GLU A 102     3711   2920   3866   -462   -194    185       C  
ATOM    765  CD  GLU A 102      63.431 -38.246  -2.119  1.00 43.94           C  
ANISOU  765  CD  GLU A 102     5789   4980   5926   -586   -176    431       C  
ATOM    766  OE1 GLU A 102      62.280 -38.675  -1.876  1.00 48.32           O  
ANISOU  766  OE1 GLU A 102     6292   5547   6522   -745   -154    482       O  
ATOM    767  OE2 GLU A 102      64.280 -38.038  -1.224  1.00 46.40           O  
ANISOU  767  OE2 GLU A 102     6158   5295   6178   -542   -186    579       O  
ATOM    768  N   ARG A 103      61.699 -39.394  -7.323  1.00 40.66           N  
ANISOU  768  N   ARG A 103     5258   4531   5657   -688   -343   -459       N  
ATOM    769  CA  ARG A 103      60.766 -39.785  -8.372  1.00 51.80           C  
ANISOU  769  CA  ARG A 103     6624   5987   7072   -818   -423   -644       C  
ATOM    770  C   ARG A 103      59.351 -39.898  -7.797  1.00 59.84           C  
ANISOU  770  C   ARG A 103     7520   7053   8165   -979   -451   -513       C  
ATOM    771  O   ARG A 103      59.109 -39.612  -6.622  1.00 64.46           O  
ANISOU  771  O   ARG A 103     8064   7662   8767   -987   -381   -295       O  
ATOM    772  CB  ARG A 103      61.228 -41.087  -9.026  1.00 60.33           C  
ANISOU  772  CB  ARG A 103     7775   6813   8334   -864   -452   -875       C  
ATOM    773  CG  ARG A 103      62.493 -40.984  -9.904  1.00 68.71           C  
ANISOU  773  CG  ARG A 103     8920   7875   9313   -725   -400  -1092       C  
ATOM    774  CD  ARG A 103      63.781 -40.807  -9.080  1.00 75.62           C  
ANISOU  774  CD  ARG A 103     9831   8637  10264   -551   -321   -953       C  
ATOM    775  NE  ARG A 103      63.739 -41.560  -7.825  1.00 75.37           N  
ANISOU  775  NE  ARG A 103     9797   8359  10483   -584   -345   -731       N  
ATOM    776  CZ  ARG A 103      64.597 -41.409  -6.818  1.00 64.60           C  
ANISOU  776  CZ  ARG A 103     8451   6917   9178   -477   -325   -521       C  
ATOM    777  NH1 ARG A 103      65.584 -40.526  -6.901  1.00 63.33           N  
ANISOU  777  NH1 ARG A 103     8299   6890   8874   -322   -271   -525       N  
ATOM    778  NH2 ARG A 103      64.463 -42.137  -5.720  1.00 58.66           N  
ANISOU  778  NH2 ARG A 103     7706   5962   8620   -545   -371   -290       N  
ATOM    779  N   LEU A 104      58.405 -40.331  -8.634  1.00 72.82           N  
ANISOU  779  N   LEU A 104     9095   8728   9845  -1124   -550   -659       N  
ATOM    780  CA  LEU A 104      56.965 -40.347  -8.335  1.00 76.82           C  
ANISOU  780  CA  LEU A 104     9436   9323  10428  -1286   -589   -570       C  
ATOM    781  C   LEU A 104      56.430 -38.928  -8.172  1.00 74.72           C  
ANISOU  781  C   LEU A 104     9044   9338  10011  -1199   -569   -450       C  
ATOM    782  O   LEU A 104      55.762 -38.403  -9.062  1.00 73.68           O  
ANISOU  782  O   LEU A 104     8813   9383   9799  -1220   -682   -522       O  
ATOM    783  CB  LEU A 104      56.648 -41.174  -7.081  1.00 76.61           C  
ANISOU  783  CB  LEU A 104     9388   9108  10613  -1408   -516   -385       C  
ATOM    784  CG  LEU A 104      56.589 -42.697  -7.208  1.00 78.71           C  
ANISOU  784  CG  LEU A 104     9706   9063  11139  -1571   -574   -469       C  
ATOM    785  CD1 LEU A 104      56.816 -43.352  -5.850  1.00 75.86           C  
ANISOU  785  CD1 LEU A 104     9388   8494  10940  -1632   -496   -208       C  
ATOM    786  CD2 LEU A 104      55.260 -43.147  -7.805  1.00 83.07           C  
ANISOU  786  CD2 LEU A 104    10112   9654  11794  -1789   -677   -580       C  
TER     787      LEU A 104                                                      
ATOM    788  N   SER B   7      21.267 -27.010 -18.969  1.00 59.43           N  
ANISOU  788  N   SER B   7     6427   8652   7502    -45  -1623    382       N  
ATOM    789  CA  SER B   7      21.824 -25.761 -18.463  1.00 63.34           C  
ANISOU  789  CA  SER B   7     7042   9166   7859     64  -1487    447       C  
ATOM    790  C   SER B   7      22.826 -25.986 -17.326  1.00 65.72           C  
ANISOU  790  C   SER B   7     7391   9408   8172     46  -1308    468       C  
ATOM    791  O   SER B   7      23.472 -25.037 -16.878  1.00 69.10           O  
ANISOU  791  O   SER B   7     7931   9828   8497    128  -1206    496       O  
ATOM    792  CB  SER B   7      20.706 -24.829 -17.980  1.00 67.92           C  
ANISOU  792  CB  SER B   7     7496   9825   8486    177  -1486    547       C  
ATOM    793  OG  SER B   7      20.099 -25.323 -16.797  1.00 70.35           O  
ANISOU  793  OG  SER B   7     7605  10177   8948    165  -1397    628       O  
ATOM    794  N   THR B   8      22.951 -27.228 -16.852  1.00 61.84           N  
ANISOU  794  N   THR B   8     6810   8863   7822    -61  -1289    462       N  
ATOM    795  CA  THR B   8      23.894 -27.563 -15.791  1.00 57.81           C  
ANISOU  795  CA  THR B   8     6335   8301   7329    -86  -1135    493       C  
ATOM    796  C   THR B   8      24.775 -28.729 -16.225  1.00 58.20           C  
ANISOU  796  C   THR B   8     6451   8239   7425   -197  -1181    385       C  
ATOM    797  O   THR B   8      24.453 -29.466 -17.160  1.00 63.83           O  
ANISOU  797  O   THR B   8     7132   8915   8204   -259  -1339    286       O  
ATOM    798  CB  THR B   8      23.186 -27.915 -14.467  1.00 55.84           C  
ANISOU  798  CB  THR B   8     5876   8115   7225    -95  -1045    640       C  
ATOM    799  OG1 THR B   8      22.364 -29.078 -14.640  1.00 55.15           O  
ANISOU  799  OG1 THR B   8     5603   8003   7348   -216  -1161    683       O  
ATOM    800  CG2 THR B   8      22.326 -26.748 -13.992  1.00 55.77           C  
ANISOU  800  CG2 THR B   8     5787   8244   7158     49   -998    711       C  
ATOM    801  N   LEU B   9      25.899 -28.886 -15.527  1.00 51.32           N  
ANISOU  801  N   LEU B   9     5666   7311   6523   -208  -1053    385       N  
ATOM    802  CA  LEU B   9      26.857 -29.943 -15.836  1.00 50.21           C  
ANISOU  802  CA  LEU B   9     5590   7059   6430   -291  -1087    271       C  
ATOM    803  C   LEU B   9      27.643 -30.273 -14.577  1.00 45.18           C  
ANISOU  803  C   LEU B   9     4950   6369   5848   -315   -942    351       C  
ATOM    804  O   LEU B   9      28.306 -29.395 -14.013  1.00 30.53           O  
ANISOU  804  O   LEU B   9     3194   4552   3854   -241   -808    385       O  
ATOM    805  CB  LEU B   9      27.802 -29.527 -16.965  1.00 51.62           C  
ANISOU  805  CB  LEU B   9     5958   7255   6401   -252  -1112    123       C  
ATOM    806  CG  LEU B   9      28.773 -30.615 -17.435  1.00 53.36           C  
ANISOU  806  CG  LEU B   9     6234   7390   6651   -306  -1162    -41       C  
ATOM    807  CD1 LEU B   9      28.010 -31.864 -17.872  1.00 51.62           C  
ANISOU  807  CD1 LEU B   9     5879   7089   6646   -381  -1352   -131       C  
ATOM    808  CD2 LEU B   9      29.677 -30.106 -18.552  1.00 49.69           C  
ANISOU  808  CD2 LEU B   9     5930   7015   5937   -251  -1165   -167       C  
ATOM    809  N   ARG B  10      27.580 -31.535 -14.161  1.00 42.20           N  
ANISOU  809  N   ARG B  10     4456   5894   5684   -418   -991    383       N  
ATOM    810  CA  ARG B  10      28.175 -31.952 -12.901  1.00 33.22           C  
ANISOU  810  CA  ARG B  10     3282   4722   4619   -450   -869    500       C  
ATOM    811  C   ARG B  10      29.679 -31.670 -12.906  1.00 33.51           C  
ANISOU  811  C   ARG B  10     3513   4712   4505   -410   -777    394       C  
ATOM    812  O   ARG B  10      30.326 -31.777 -13.952  1.00 32.99           O  
ANISOU  812  O   ARG B  10     3569   4600   4366   -405   -845    220       O  
ATOM    813  CB  ARG B  10      27.894 -33.441 -12.670  1.00 37.12           C  
ANISOU  813  CB  ARG B  10     3619   5083   5403   -586   -983    558       C  
ATOM    814  CG  ARG B  10      28.824 -34.140 -11.690  1.00 57.37           C  
ANISOU  814  CG  ARG B  10     6180   7560   8058   -637   -907    638       C  
ATOM    815  CD  ARG B  10      28.551 -35.636 -11.619  1.00 73.00           C  
ANISOU  815  CD  ARG B  10     8004   9362  10369   -780  -1068    697       C  
ATOM    816  NE  ARG B  10      28.274 -36.213 -12.932  1.00 79.09           N  
ANISOU  816  NE  ARG B  10     8788  10007  11256   -812  -1286    487       N  
ATOM    817  CZ  ARG B  10      29.183 -36.830 -13.683  1.00 75.10           C  
ANISOU  817  CZ  ARG B  10     8396   9354  10783   -807  -1393    251       C  
ATOM    818  NH1 ARG B  10      30.436 -36.941 -13.255  1.00 69.40           N  
ANISOU  818  NH1 ARG B  10     7785   8582  10001   -781  -1295    213       N  
ATOM    819  NH2 ARG B  10      28.841 -37.330 -14.865  1.00 71.42           N  
ANISOU  819  NH2 ARG B  10     7927   8808  10403   -814  -1604     39       N  
ATOM    820  N   PRO B  11      30.263 -31.277 -11.770  1.00 35.51           N  
ANISOU  820  N   PRO B  11     3791   5003   4697   -371   -625    490       N  
ATOM    821  CA  PRO B  11      31.709 -31.027 -11.742  1.00 35.83           C  
ANISOU  821  CA  PRO B  11     4001   4995   4618   -341   -546    398       C  
ATOM    822  C   PRO B  11      32.493 -32.303 -12.017  1.00 33.65           C  
ANISOU  822  C   PRO B  11     3735   4572   4478   -424   -617    305       C  
ATOM    823  O   PRO B  11      32.070 -33.404 -11.666  1.00 31.83           O  
ANISOU  823  O   PRO B  11     3369   4256   4468   -511   -694    374       O  
ATOM    824  CB  PRO B  11      31.960 -30.517 -10.316  1.00 32.65           C  
ANISOU  824  CB  PRO B  11     3578   4665   4163   -287   -398    530       C  
ATOM    825  CG  PRO B  11      30.631 -30.106  -9.801  1.00 34.80           C  
ANISOU  825  CG  PRO B  11     3700   5073   4450   -244   -383    658       C  
ATOM    826  CD  PRO B  11      29.638 -31.003 -10.466  1.00 38.12           C  
ANISOU  826  CD  PRO B  11     3986   5453   5045   -339   -520    679       C  
ATOM    827  N   MET B  12      33.657 -32.141 -12.640  1.00 33.65           N  
ANISOU  827  N   MET B  12     3885   4544   4357   -395   -600    155       N  
ATOM    828  CA  MET B  12      34.498 -33.274 -13.003  1.00 34.81           C  
ANISOU  828  CA  MET B  12     4049   4564   4613   -440   -673     20       C  
ATOM    829  C   MET B  12      35.956 -32.854 -12.914  1.00 31.98           C  
ANISOU  829  C   MET B  12     3828   4217   4106   -395   -561    -47       C  
ATOM    830  O   MET B  12      36.319 -31.772 -13.379  1.00 29.80           O  
ANISOU  830  O   MET B  12     3656   4043   3622   -336   -496    -72       O  
ATOM    831  CB  MET B  12      34.169 -33.764 -14.416  1.00 40.80           C  
ANISOU  831  CB  MET B  12     4808   5311   5384   -443   -838   -174       C  
ATOM    832  CG  MET B  12      34.958 -34.979 -14.860  1.00 60.82           C  
ANISOU  832  CG  MET B  12     7347   7716   8048   -461   -946   -365       C  
ATOM    833  SD  MET B  12      34.848 -35.252 -16.641  1.00 73.86           S  
ANISOU  833  SD  MET B  12     9033   9436   9595   -404  -1117   -658       S  
ATOM    834  CE  MET B  12      33.101 -34.957 -16.918  1.00 75.04           C  
ANISOU  834  CE  MET B  12     9078   9629   9803   -439  -1224   -556       C  
ATOM    835  N   PHE B  13      36.790 -33.701 -12.322  1.00 28.09           N  
ANISOU  835  N   PHE B  13     3323   3614   3737   -426   -551    -59       N  
ATOM    836  CA  PHE B  13      38.217 -33.416 -12.271  1.00 33.11           C  
ANISOU  836  CA  PHE B  13     4070   4257   4253   -387   -457   -132       C  
ATOM    837  C   PHE B  13      38.857 -33.816 -13.594  1.00 33.29           C  
ANISOU  837  C   PHE B  13     4146   4293   4211   -357   -533   -364       C  
ATOM    838  O   PHE B  13      38.730 -34.964 -14.028  1.00 33.47           O  
ANISOU  838  O   PHE B  13     4107   4215   4397   -377   -672   -497       O  
ATOM    839  CB  PHE B  13      38.870 -34.147 -11.101  1.00 29.42           C  
ANISOU  839  CB  PHE B  13     3562   3679   3937   -421   -421    -51       C  
ATOM    840  CG  PHE B  13      38.575 -33.526  -9.761  1.00 34.83           C  
ANISOU  840  CG  PHE B  13     4217   4427   4592   -414   -309    160       C  
ATOM    841  CD1 PHE B  13      39.219 -32.361  -9.364  1.00 29.23           C  
ANISOU  841  CD1 PHE B  13     3606   3804   3697   -349   -187    180       C  
ATOM    842  CD2 PHE B  13      37.648 -34.100  -8.903  1.00 33.20           C  
ANISOU  842  CD2 PHE B  13     3867   4206   4541   -467   -335    336       C  
ATOM    843  CE1 PHE B  13      38.944 -31.777  -8.135  1.00 31.15           C  
ANISOU  843  CE1 PHE B  13     3817   4122   3898   -314   -101    329       C  
ATOM    844  CE2 PHE B  13      37.366 -33.523  -7.673  1.00 32.54           C  
ANISOU  844  CE2 PHE B  13     3739   4238   4388   -435   -225    515       C  
ATOM    845  CZ  PHE B  13      38.013 -32.362  -7.286  1.00 31.30           C  
ANISOU  845  CZ  PHE B  13     3691   4169   4031   -347   -112    489       C  
ATOM    846  N   LYS B  14      39.523 -32.864 -14.249  1.00 22.62           N  
ANISOU  846  N   LYS B  14     2894   3076   2623   -305   -454   -412       N  
ATOM    847  CA  LYS B  14      40.304 -33.181 -15.438  1.00 24.96           C  
ANISOU  847  CA  LYS B  14     3227   3453   2804   -260   -493   -619       C  
ATOM    848  C   LYS B  14      41.747 -33.511 -15.094  1.00 28.82           C  
ANISOU  848  C   LYS B  14     3745   3909   3296   -242   -419   -683       C  
ATOM    849  O   LYS B  14      42.386 -34.295 -15.803  1.00 38.31           O  
ANISOU  849  O   LYS B  14     4931   5127   4498   -198   -479   -890       O  
ATOM    850  CB  LYS B  14      40.255 -32.020 -16.429  1.00 32.55           C  
ANISOU  850  CB  LYS B  14     4253   4615   3500   -222   -453   -602       C  
ATOM    851  CG  LYS B  14      38.884 -31.822 -17.071  1.00 45.43           C  
ANISOU  851  CG  LYS B  14     5850   6298   5112   -223   -558   -589       C  
ATOM    852  CD  LYS B  14      38.841 -30.546 -17.894  1.00 54.21           C  
ANISOU  852  CD  LYS B  14     7027   7597   5975   -192   -517   -512       C  
ATOM    853  CE  LYS B  14      37.502 -30.374 -18.593  1.00 60.79           C  
ANISOU  853  CE  LYS B  14     7823   8491   6784   -185   -634   -507       C  
ATOM    854  NZ  LYS B  14      37.355 -28.998 -19.151  1.00 61.28           N  
ANISOU  854  NZ  LYS B  14     7943   8698   6644   -164   -599   -365       N  
ATOM    855  N   ARG B  15      42.265 -32.922 -14.020  1.00 25.06           N  
ANISOU  855  N   ARG B  15     3304   3397   2823   -261   -300   -527       N  
ATOM    856  CA  ARG B  15      43.535 -33.293 -13.409  1.00 28.02           C  
ANISOU  856  CA  ARG B  15     3690   3709   3249   -255   -238   -553       C  
ATOM    857  C   ARG B  15      43.313 -33.374 -11.909  1.00 26.69           C  
ANISOU  857  C   ARG B  15     3494   3418   3228   -295   -203   -379       C  
ATOM    858  O   ARG B  15      42.781 -32.434 -11.312  1.00 20.66           O  
ANISOU  858  O   ARG B  15     2751   2698   2402   -298   -141   -227       O  
ATOM    859  CB  ARG B  15      44.629 -32.275 -13.715  1.00 19.58           C  
ANISOU  859  CB  ARG B  15     2692   2774   1975   -228   -121   -536       C  
ATOM    860  CG  ARG B  15      44.915 -32.144 -15.175  1.00 20.76           C  
ANISOU  860  CG  ARG B  15     2848   3105   1934   -185   -135   -670       C  
ATOM    861  CD  ARG B  15      45.540 -33.418 -15.711  1.00 33.83           C  
ANISOU  861  CD  ARG B  15     4450   4753   3649   -133   -205   -910       C  
ATOM    862  NE  ARG B  15      46.700 -33.016 -16.477  1.00 44.47           N  
ANISOU  862  NE  ARG B  15     5805   6304   4787    -85   -118   -976       N  
ATOM    863  CZ  ARG B  15      47.952 -33.152 -16.080  1.00 35.20           C  
ANISOU  863  CZ  ARG B  15     4620   5124   3629    -71    -42   -998       C  
ATOM    864  NH1 ARG B  15      48.244 -33.751 -14.938  1.00 37.49           N  
ANISOU  864  NH1 ARG B  15     4902   5205   4137    -93    -53   -976       N  
ATOM    865  NH2 ARG B  15      48.916 -32.709 -16.855  1.00 38.22           N  
ANISOU  865  NH2 ARG B  15     4986   5731   3804    -33     42  -1029       N  
ATOM    866  N   LEU B  16      43.723 -34.487 -11.311  1.00 24.59           N  
ANISOU  866  N   LEU B  16     3174   3014   3154   -315   -250   -403       N  
ATOM    867  CA  LEU B  16      43.421 -34.806  -9.924  1.00 26.50           C  
ANISOU  867  CA  LEU B  16     3361   3163   3546   -358   -237   -220       C  
ATOM    868  C   LEU B  16      44.609 -34.483  -9.028  1.00 25.90           C  
ANISOU  868  C   LEU B  16     3330   3087   3426   -338   -136   -167       C  
ATOM    869  O   LEU B  16      45.743 -34.347  -9.487  1.00 27.47           O  
ANISOU  869  O   LEU B  16     3579   3309   3547   -304    -99   -287       O  
ATOM    870  CB  LEU B  16      43.046 -36.286  -9.787  1.00 29.10           C  
ANISOU  870  CB  LEU B  16     3583   3320   4152   -407   -382   -235       C  
ATOM    871  CG  LEU B  16      41.616 -36.702 -10.163  1.00 37.91           C  
ANISOU  871  CG  LEU B  16     4613   4402   5391   -456   -500   -201       C  
ATOM    872  CD1 LEU B  16      41.364 -36.627 -11.664  1.00 40.99           C  
ANISOU  872  CD1 LEU B  16     5037   4849   5688   -415   -580   -423       C  
ATOM    873  CD2 LEU B  16      41.318 -38.105  -9.644  1.00 43.82           C  
ANISOU  873  CD2 LEU B  16     5235   4948   6468   -531   -646   -131       C  
ATOM    874  N   LEU B  17      44.333 -34.356  -7.734  1.00 21.89           N  
ANISOU  874  N   LEU B  17     2787   2574   2956   -354    -92     17       N  
ATOM    875  CA  LEU B  17      45.417 -34.225  -6.769  1.00 25.18           C  
ANISOU  875  CA  LEU B  17     3230   2979   3356   -335    -24     66       C  
ATOM    876  C   LEU B  17      46.347 -35.427  -6.878  1.00 29.37           C  
ANISOU  876  C   LEU B  17     3731   3375   4055   -347    -93    -27       C  
ATOM    877  O   LEU B  17      45.899 -36.559  -7.076  1.00 28.01           O  
ANISOU  877  O   LEU B  17     3480   3081   4082   -385   -210    -42       O  
ATOM    878  CB  LEU B  17      44.861 -34.126  -5.350  1.00 28.52           C  
ANISOU  878  CB  LEU B  17     3594   3448   3793   -339     13    275       C  
ATOM    879  CG  LEU B  17      44.118 -32.863  -4.927  1.00 27.99           C  
ANISOU  879  CG  LEU B  17     3551   3530   3556   -289     86    351       C  
ATOM    880  CD1 LEU B  17      43.423 -33.121  -3.600  1.00 28.06           C  
ANISOU  880  CD1 LEU B  17     3453   3620   3588   -286    107    550       C  
ATOM    881  CD2 LEU B  17      45.072 -31.679  -4.821  1.00 24.49           C  
ANISOU  881  CD2 LEU B  17     3216   3130   2959   -228    153    281       C  
ATOM    882  N   ALA B  18      47.648 -35.178  -6.751  1.00 28.14           N  
ANISOU  882  N   ALA B  18     3626   3227   3839   -312    -37    -93       N  
ATOM    883  CA  ALA B  18      48.660 -36.223  -6.831  1.00 31.74           C  
ANISOU  883  CA  ALA B  18     4049   3565   4444   -302    -98   -200       C  
ATOM    884  C   ALA B  18      49.463 -36.258  -5.538  1.00 23.59           C  
ANISOU  884  C   ALA B  18     3011   2504   3447   -299    -58    -77       C  
ATOM    885  O   ALA B  18      49.734 -35.213  -4.939  1.00 23.70           O  
ANISOU  885  O   ALA B  18     3079   2621   3306   -280     36     -3       O  
ATOM    886  CB  ALA B  18      49.592 -36.001  -8.026  1.00 30.62           C  
ANISOU  886  CB  ALA B  18     3950   3491   4194   -249    -72   -417       C  
ATOM    887  N   ASN B  19      49.837 -37.464  -5.107  1.00 25.00           N  
ANISOU  887  N   ASN B  19     3121   2534   3843   -314   -151    -59       N  
ATOM    888  CA  ASN B  19      50.604 -37.614  -3.875  1.00 26.85           C  
ANISOU  888  CA  ASN B  19     3340   2745   4118   -311   -132     70       C  
ATOM    889  C   ASN B  19      51.908 -36.834  -3.953  1.00 32.71           C  
ANISOU  889  C   ASN B  19     4151   3562   4715   -257    -44    -38       C  
ATOM    890  O   ASN B  19      52.564 -36.787  -4.997  1.00 31.91           O  
ANISOU  890  O   ASN B  19     4070   3473   4581   -224    -34   -230       O  
ATOM    891  CB  ASN B  19      50.902 -39.086  -3.600  1.00 26.72           C  
ANISOU  891  CB  ASN B  19     3234   2530   4388   -333   -271     92       C  
ATOM    892  CG  ASN B  19      49.663 -39.865  -3.206  1.00 34.36           C  
ANISOU  892  CG  ASN B  19     4104   3412   5538   -411   -371    284       C  
ATOM    893  OD1 ASN B  19      48.716 -39.311  -2.638  1.00 25.90           O  
ANISOU  893  OD1 ASN B  19     3017   2470   4355   -444   -306    468       O  
ATOM    894  ND2 ASN B  19      49.661 -41.159  -3.512  1.00 36.69           N  
ANISOU  894  ND2 ASN B  19     4320   3488   6130   -438   -540    240       N  
ATOM    895  N   ALA B  20      52.288 -36.220  -2.838  1.00 23.99           N  
ANISOU  895  N   ALA B  20     3068   2525   3521   -246     16     88       N  
ATOM    896  CA  ALA B  20      53.450 -35.354  -2.817  1.00 26.03           C  
ANISOU  896  CA  ALA B  20     3384   2849   3658   -209     86     10       C  
ATOM    897  C   ALA B  20      54.285 -35.628  -1.580  1.00 29.35           C  
ANISOU  897  C   ALA B  20     3780   3242   4130   -192     69    103       C  
ATOM    898  O   ALA B  20      53.824 -36.201  -0.587  1.00 24.63           O  
ANISOU  898  O   ALA B  20     3132   2627   3600   -205     27    269       O  
ATOM    899  CB  ALA B  20      53.062 -33.869  -2.862  1.00 30.34           C  
ANISOU  899  CB  ALA B  20     4003   3523   4001   -199    165     29       C  
ATOM    900  N   GLU B  21      55.527 -35.179  -1.664  1.00 32.63           N  
ANISOU  900  N   GLU B  21     4220   3674   4505   -164    101     10       N  
ATOM    901  CA  GLU B  21      56.513 -35.365  -0.620  1.00 29.57           C  
ANISOU  901  CA  GLU B  21     3810   3264   4161   -141     78     64       C  
ATOM    902  C   GLU B  21      57.426 -34.150  -0.661  1.00 21.35           C  
ANISOU  902  C   GLU B  21     2818   2300   2994   -123    136     -5       C  
ATOM    903  O   GLU B  21      57.752 -33.658  -1.742  1.00 24.95           O  
ANISOU  903  O   GLU B  21     3289   2786   3403   -134    181   -115       O  
ATOM    904  CB  GLU B  21      57.277 -36.676  -0.854  1.00 38.27           C  
ANISOU  904  CB  GLU B  21     4841   4229   5469   -131      1     -3       C  
ATOM    905  CG  GLU B  21      58.477 -36.902   0.011  1.00 40.61           C  
ANISOU  905  CG  GLU B  21     5108   4497   5826   -101    -30     25       C  
ATOM    906  CD  GLU B  21      59.709 -36.194  -0.525  1.00 40.27           C  
ANISOU  906  CD  GLU B  21     5076   4508   5717    -76     27   -122       C  
ATOM    907  OE1 GLU B  21      60.047 -36.349  -1.722  1.00 38.94           O  
ANISOU  907  OE1 GLU B  21     4884   4345   5566    -63     51   -281       O  
ATOM    908  OE2 GLU B  21      60.315 -35.446   0.258  1.00 31.67           O  
ANISOU  908  OE2 GLU B  21     4009   3476   4549    -67     44    -73       O  
ATOM    909  N   CYS B  22      57.819 -33.656   0.509  1.00 24.43           N  
ANISOU  909  N   CYS B  22     3222   2731   3329    -97    125     70       N  
ATOM    910  CA  CYS B  22      58.784 -32.569   0.555  1.00 24.07           C  
ANISOU  910  CA  CYS B  22     3208   2722   3217    -87    144      6       C  
ATOM    911  C   CYS B  22      59.556 -32.636   1.862  1.00 26.41           C  
ANISOU  911  C   CYS B  22     3486   3024   3525    -48     90     58       C  
ATOM    912  O   CYS B  22      59.142 -33.286   2.827  1.00 30.42           O  
ANISOU  912  O   CYS B  22     3969   3552   4040    -22     53    171       O  
ATOM    913  CB  CYS B  22      58.116 -31.197   0.407  1.00 23.63           C  
ANISOU  913  CB  CYS B  22     3221   2732   3026    -87    171      4       C  
ATOM    914  SG  CYS B  22      57.303 -30.628   1.908  1.00 32.76           S  
ANISOU  914  SG  CYS B  22     4408   3978   4063    -16    135     90       S  
ATOM    915  N   GLN B  23      60.683 -31.940   1.874  1.00 20.44           N  
ANISOU  915  N   GLN B  23     2730   2264   2771    -47     82    -10       N  
ATOM    916  CA  GLN B  23      61.531 -31.812   3.044  1.00 22.57           C  
ANISOU  916  CA  GLN B  23     2985   2546   3045     -6     18     11       C  
ATOM    917  C   GLN B  23      61.045 -30.663   3.914  1.00 15.93           C  
ANISOU  917  C   GLN B  23     2204   1785   2065     42    -17     21       C  
ATOM    918  O   GLN B  23      60.702 -29.593   3.404  1.00 20.25           O  
ANISOU  918  O   GLN B  23     2799   2333   2562     28     -3    -31       O  
ATOM    919  CB  GLN B  23      62.971 -31.558   2.605  1.00 27.15           C  
ANISOU  919  CB  GLN B  23     3521   3084   3711    -31     12    -73       C  
ATOM    920  CG  GLN B  23      64.034 -32.068   3.538  1.00 35.08           C  
ANISOU  920  CG  GLN B  23     4472   4067   4790      4    -59    -59       C  
ATOM    921  CD  GLN B  23      65.402 -32.050   2.875  1.00 33.65           C  
ANISOU  921  CD  GLN B  23     4215   3853   4718    -25    -48   -141       C  
ATOM    922  OE1 GLN B  23      65.778 -31.065   2.238  1.00 22.01           O  
ANISOU  922  OE1 GLN B  23     2738   2399   3227    -72    -18   -182       O  
ATOM    923  NE2 GLN B  23      66.134 -33.156   2.988  1.00 35.14           N  
ANISOU  923  NE2 GLN B  23     4327   3996   5028      3    -76   -153       N  
ATOM    924  N   GLU B  24      61.016 -30.896   5.227  1.00 21.53           N  
ANISOU  924  N   GLU B  24     2902   2569   2711    110    -73     84       N  
ATOM    925  CA  GLU B  24      60.641 -29.863   6.184  1.00 19.37           C  
ANISOU  925  CA  GLU B  24     2671   2402   2288    193   -124     54       C  
ATOM    926  C   GLU B  24      61.320 -28.548   5.846  1.00 19.80           C  
ANISOU  926  C   GLU B  24     2765   2385   2375    182   -175    -78       C  
ATOM    927  O   GLU B  24      62.535 -28.501   5.626  1.00 17.85           O  
ANISOU  927  O   GLU B  24     2485   2056   2241    138   -206   -118       O  
ATOM    928  CB  GLU B  24      61.034 -30.293   7.600  1.00 18.97           C  
ANISOU  928  CB  GLU B  24     2582   2458   2168    272   -194    115       C  
ATOM    929  CG  GLU B  24      60.644 -29.289   8.693  1.00 25.12           C  
ANISOU  929  CG  GLU B  24     3393   3394   2759    395   -260     51       C  
ATOM    930  CD  GLU B  24      61.695 -28.196   8.930  1.00 25.40           C  
ANISOU  930  CD  GLU B  24     3458   3362   2832    425   -370   -114       C  
ATOM    931  OE1 GLU B  24      62.904 -28.511   9.024  1.00 25.45           O  
ANISOU  931  OE1 GLU B  24     3429   3291   2949    390   -418   -122       O  
ATOM    932  OE2 GLU B  24      61.308 -27.010   9.014  1.00 23.12           O  
ANISOU  932  OE2 GLU B  24     3219   3084   2483    485   -425   -238       O  
ATOM    933  N   GLY B  25      60.532 -27.473   5.813  1.00 20.91           N  
ANISOU  933  N   GLY B  25     2960   2550   2434    221   -194   -136       N  
ATOM    934  CA  GLY B  25      61.027 -26.145   5.554  1.00 20.43           C  
ANISOU  934  CA  GLY B  25     2932   2396   2434    209   -275   -242       C  
ATOM    935  C   GLY B  25      60.896 -25.709   4.108  1.00 24.66           C  
ANISOU  935  C   GLY B  25     3481   2833   3057    102   -218   -225       C  
ATOM    936  O   GLY B  25      60.804 -24.504   3.838  1.00 26.91           O  
ANISOU  936  O   GLY B  25     3799   3046   3380     95   -288   -275       O  
ATOM    937  N   GLN B  26      60.880 -26.657   3.176  1.00 21.02           N  
ANISOU  937  N   GLN B  26     2986   2370   2630     27   -108   -158       N  
ATOM    938  CA  GLN B  26      60.601 -26.341   1.782  1.00 25.43           C  
ANISOU  938  CA  GLN B  26     3551   2893   3220    -58    -43   -135       C  
ATOM    939  C   GLN B  26      59.092 -26.206   1.556  1.00 21.49           C  
ANISOU  939  C   GLN B  26     3102   2439   2623    -25    -10   -116       C  
ATOM    940  O   GLN B  26      58.274 -26.490   2.431  1.00 22.16           O  
ANISOU  940  O   GLN B  26     3202   2598   2619     58    -18   -109       O  
ATOM    941  CB  GLN B  26      61.174 -27.417   0.860  1.00 15.29           C  
ANISOU  941  CB  GLN B  26     2202   1617   1992   -123     48   -113       C  
ATOM    942  CG  GLN B  26      62.684 -27.613   0.981  1.00 23.36           C  
ANISOU  942  CG  GLN B  26     3149   2611   3114   -152     26   -132       C  
ATOM    943  CD  GLN B  26      63.484 -26.596   0.180  1.00 26.79           C  
ANISOU  943  CD  GLN B  26     3544   3020   3614   -236     19   -116       C  
ATOM    944  OE1 GLN B  26      62.964 -25.957  -0.735  1.00 23.82           O  
ANISOU  944  OE1 GLN B  26     3186   2655   3208   -286     51    -76       O  
ATOM    945  NE2 GLN B  26      64.759 -26.451   0.516  1.00 33.12           N  
ANISOU  945  NE2 GLN B  26     4277   3795   4512   -259    -29   -125       N  
ATOM    946  N   SER B  27      58.732 -25.778   0.357  1.00 21.11           N  
ANISOU  946  N   SER B  27     3067   2369   2586    -90     30    -93       N  
ATOM    947  CA  SER B  27      57.345 -25.636  -0.054  1.00 14.59           C  
ANISOU  947  CA  SER B  27     2280   1581   1684    -70     60    -72       C  
ATOM    948  C   SER B  27      56.887 -26.865  -0.824  1.00 23.07           C  
ANISOU  948  C   SER B  27     3323   2700   2742   -107    152    -41       C  
ATOM    949  O   SER B  27      57.691 -27.624  -1.367  1.00 28.27           O  
ANISOU  949  O   SER B  27     3934   3354   3454   -153    193    -52       O  
ATOM    950  CB  SER B  27      57.159 -24.388  -0.925  1.00 16.24           C  
ANISOU  950  CB  SER B  27     2519   1734   1918   -115     24    -55       C  
ATOM    951  OG  SER B  27      57.462 -23.220  -0.180  1.00 29.17           O  
ANISOU  951  OG  SER B  27     4184   3292   3608    -72    -99   -101       O  
ATOM    952  N   VAL B  28      55.572 -27.054  -0.860  1.00 21.33           N  
ANISOU  952  N   VAL B  28     3120   2524   2458    -76    171    -17       N  
ATOM    953  CA  VAL B  28      54.962 -28.099  -1.665  1.00 22.36           C  
ANISOU  953  CA  VAL B  28     3222   2677   2595   -112    226      1       C  
ATOM    954  C   VAL B  28      53.699 -27.531  -2.298  1.00 24.40           C  
ANISOU  954  C   VAL B  28     3513   2968   2791   -110    232     19       C  
ATOM    955  O   VAL B  28      53.022 -26.673  -1.726  1.00 25.08           O  
ANISOU  955  O   VAL B  28     3630   3073   2826    -52    196     27       O  
ATOM    956  CB  VAL B  28      54.659 -29.376  -0.849  1.00 23.88           C  
ANISOU  956  CB  VAL B  28     3368   2884   2821    -87    227     45       C  
ATOM    957  CG1 VAL B  28      53.478 -29.162   0.075  1.00 22.28           C  
ANISOU  957  CG1 VAL B  28     3166   2763   2538    -24    216    111       C  
ATOM    958  CG2 VAL B  28      54.403 -30.557  -1.785  1.00 23.51           C  
ANISOU  958  CG2 VAL B  28     3280   2806   2848   -134    248     32       C  
ATOM    959  N   CYS B  29      53.398 -28.014  -3.498  1.00 24.30           N  
ANISOU  959  N   CYS B  29     3485   2967   2779   -160    266      8       N  
ATOM    960  CA  CYS B  29      52.304 -27.515  -4.310  1.00 25.88           C  
ANISOU  960  CA  CYS B  29     3711   3202   2922   -167    266     25       C  
ATOM    961  C   CYS B  29      51.429 -28.679  -4.754  1.00 28.71           C  
ANISOU  961  C   CYS B  29     4030   3580   3300   -179    277     18       C  
ATOM    962  O   CYS B  29      51.936 -29.753  -5.096  1.00 35.49           O  
ANISOU  962  O   CYS B  29     4848   4417   4222   -201    284    -32       O  
ATOM    963  CB  CYS B  29      52.853 -26.752  -5.528  1.00 32.12           C  
ANISOU  963  CB  CYS B  29     4515   4009   3681   -221    277     27       C  
ATOM    964  SG  CYS B  29      51.614 -25.969  -6.566  1.00 47.75           S  
ANISOU  964  SG  CYS B  29     6525   6032   5585   -231    258     72       S  
ATOM    965  N   PHE B  30      50.115 -28.467  -4.705  1.00 27.62           N  
ANISOU  965  N   PHE B  30     3894   3475   3127   -157    263     58       N  
ATOM    966  CA  PHE B  30      49.116 -29.373  -5.259  1.00 23.50           C  
ANISOU  966  CA  PHE B  30     3328   2964   2636   -179    251     60       C  
ATOM    967  C   PHE B  30      48.358 -28.624  -6.347  1.00 26.61           C  
ANISOU  967  C   PHE B  30     3753   3403   2954   -187    241     51       C  
ATOM    968  O   PHE B  30      47.975 -27.468  -6.147  1.00 29.91           O  
ANISOU  968  O   PHE B  30     4210   3840   3316   -153    231     89       O  
ATOM    969  CB  PHE B  30      48.143 -29.850  -4.180  1.00 24.31           C  
ANISOU  969  CB  PHE B  30     3376   3090   2772   -152    240    151       C  
ATOM    970  CG  PHE B  30      48.761 -30.765  -3.166  1.00 31.47           C  
ANISOU  970  CG  PHE B  30     4235   3965   3757   -154    238    198       C  
ATOM    971  CD1 PHE B  30      48.799 -32.137  -3.381  1.00 31.67           C  
ANISOU  971  CD1 PHE B  30     4198   3914   3922   -203    201    205       C  
ATOM    972  CD2 PHE B  30      49.298 -30.257  -1.995  1.00 32.55           C  
ANISOU  972  CD2 PHE B  30     4385   4140   3840   -100    252    231       C  
ATOM    973  CE1 PHE B  30      49.362 -32.988  -2.443  1.00 31.82           C  
ANISOU  973  CE1 PHE B  30     4166   3889   4035   -208    182    275       C  
ATOM    974  CE2 PHE B  30      49.868 -31.102  -1.056  1.00 37.49           C  
ANISOU  974  CE2 PHE B  30     4964   4754   4529   -100    243    294       C  
ATOM    975  CZ  PHE B  30      49.900 -32.468  -1.279  1.00 35.53           C  
ANISOU  975  CZ  PHE B  30     4650   4422   4427   -159    210    331       C  
ATOM    976  N   GLU B  31      48.159 -29.264  -7.497  1.00 28.51           N  
ANISOU  976  N   GLU B  31     3974   3662   3196   -220    227    -10       N  
ATOM    977  CA  GLU B  31      47.536 -28.628  -8.654  1.00 27.21           C  
ANISOU  977  CA  GLU B  31     3833   3564   2942   -229    212    -16       C  
ATOM    978  C   GLU B  31      46.395 -29.488  -9.180  1.00 34.77           C  
ANISOU  978  C   GLU B  31     4743   4531   3936   -237    162    -49       C  
ATOM    979  O   GLU B  31      46.545 -30.702  -9.335  1.00 32.25           O  
ANISOU  979  O   GLU B  31     4377   4169   3709   -252    131   -125       O  
ATOM    980  CB  GLU B  31      48.557 -28.394  -9.782  1.00 31.10           C  
ANISOU  980  CB  GLU B  31     4338   4125   3351   -254    238    -66       C  
ATOM    981  CG  GLU B  31      49.673 -27.399  -9.452  1.00 41.67           C  
ANISOU  981  CG  GLU B  31     5708   5456   4670   -267    273     -6       C  
ATOM    982  CD  GLU B  31      50.888 -27.515 -10.380  1.00 55.93           C  
ANISOU  982  CD  GLU B  31     7482   7355   6413   -296    318    -44       C  
ATOM    983  OE1 GLU B  31      51.937 -26.909 -10.060  1.00 62.54           O  
ANISOU  983  OE1 GLU B  31     8318   8177   7266   -319    343      8       O  
ATOM    984  OE2 GLU B  31      50.804 -28.210 -11.418  1.00 53.31           O  
ANISOU  984  OE2 GLU B  31     7114   7127   6015   -288    323   -133       O  
ATOM    985  N   ILE B  32      45.257 -28.854  -9.472  1.00 27.07           N  
ANISOU  985  N   ILE B  32     3774   3597   2913   -226    134      1       N  
ATOM    986  CA  ILE B  32      44.104 -29.550 -10.031  1.00 28.98           C  
ANISOU  986  CA  ILE B  32     3965   3852   3196   -239     72    -26       C  
ATOM    987  C   ILE B  32      43.514 -28.735 -11.170  1.00 29.25           C  
ANISOU  987  C   ILE B  32     4029   3973   3110   -232     43    -26       C  
ATOM    988  O   ILE B  32      43.697 -27.518 -11.268  1.00 19.12           O  
ANISOU  988  O   ILE B  32     2801   2722   1743   -216     63     40       O  
ATOM    989  CB  ILE B  32      42.998 -29.815  -8.987  1.00 25.43           C  
ANISOU  989  CB  ILE B  32     3448   3379   2837   -231     57     72       C  
ATOM    990  CG1 ILE B  32      42.560 -28.492  -8.357  1.00 26.75           C  
ANISOU  990  CG1 ILE B  32     3646   3595   2924   -172     89    154       C  
ATOM    991  CG2 ILE B  32      43.467 -30.799  -7.934  1.00 28.91           C  
ANISOU  991  CG2 ILE B  32     3836   3750   3400   -249     70    106       C  
ATOM    992  CD1 ILE B  32      41.203 -28.535  -7.774  1.00 18.40           C  
ANISOU  992  CD1 ILE B  32     2506   2587   1900   -145     73    235       C  
ATOM    993  N   ARG B  33      42.782 -29.432 -12.030  1.00 17.46           N  
ANISOU  993  N   ARG B  33     2496   2509   1630   -244    -26    -97       N  
ATOM    994  CA  ARG B  33      41.886 -28.809 -12.990  1.00 18.07           C  
ANISOU  994  CA  ARG B  33     2583   2674   1611   -234    -76    -81       C  
ATOM    995  C   ARG B  33      40.524 -29.459 -12.818  1.00 23.80           C  
ANISOU  995  C   ARG B  33     3229   3364   2449   -242   -152    -74       C  
ATOM    996  O   ARG B  33      40.412 -30.687 -12.880  1.00 22.67           O  
ANISOU  996  O   ARG B  33     3025   3161   2428   -270   -210   -156       O  
ATOM    997  CB  ARG B  33      42.397 -28.959 -14.425  1.00 23.28           C  
ANISOU  997  CB  ARG B  33     3258   3453   2135   -232    -99   -187       C  
ATOM    998  CG  ARG B  33      43.525 -28.002 -14.778  1.00 19.37           C  
ANISOU  998  CG  ARG B  33     2818   3042   1500   -235    -25   -127       C  
ATOM    999  CD  ARG B  33      43.920 -28.071 -16.258  1.00 21.43           C  
ANISOU  999  CD  ARG B  33     3070   3496   1578   -224    -36   -201       C  
ATOM   1000  NE  ARG B  33      42.807 -27.779 -17.172  1.00 24.08           N  
ANISOU 1000  NE  ARG B  33     3398   3928   1821   -212   -117   -185       N  
ATOM   1001  CZ  ARG B  33      42.358 -26.557 -17.457  1.00 33.16           C  
ANISOU 1001  CZ  ARG B  33     4581   5123   2895   -221   -130    -21       C  
ATOM   1002  NH1 ARG B  33      42.911 -25.487 -16.892  1.00 20.80           N  
ANISOU 1002  NH1 ARG B  33     3057   3496   1352   -244    -79    134       N  
ATOM   1003  NH2 ARG B  33      41.348 -26.400 -18.307  1.00 28.68           N  
ANISOU 1003  NH2 ARG B  33     4000   4648   2247   -204   -214    -15       N  
ATOM   1004  N   VAL B  34      39.501 -28.644 -12.577  1.00 18.53           N  
ANISOU 1004  N   VAL B  34     2550   2724   1766   -218   -163     26       N  
ATOM   1005  CA  VAL B  34      38.138 -29.128 -12.395  1.00 30.55           C  
ANISOU 1005  CA  VAL B  34     3975   4240   3392   -227   -228     60       C  
ATOM   1006  C   VAL B  34      37.198 -28.249 -13.208  1.00 37.14           C  
ANISOU 1006  C   VAL B  34     4821   5156   4136   -196   -283     87       C  
ATOM   1007  O   VAL B  34      37.349 -27.022 -13.243  1.00 31.30           O  
ANISOU 1007  O   VAL B  34     4146   4448   3298   -153   -255    147       O  
ATOM   1008  CB  VAL B  34      37.730 -29.150 -10.905  1.00 30.13           C  
ANISOU 1008  CB  VAL B  34     3853   4163   3431   -212   -172    179       C  
ATOM   1009  CG1 VAL B  34      37.883 -27.770 -10.279  1.00 23.49           C  
ANISOU 1009  CG1 VAL B  34     3072   3363   2491   -135   -108    239       C  
ATOM   1010  CG2 VAL B  34      36.304 -29.674 -10.737  1.00 36.17           C  
ANISOU 1010  CG2 VAL B  34     4485   4951   4308   -233   -233    247       C  
ATOM   1011  N   SER B  35      36.239 -28.878 -13.873  1.00 36.81           N  
ANISOU 1011  N   SER B  35     4707   5132   4146   -219   -382     44       N  
ATOM   1012  CA  SER B  35      35.284 -28.203 -14.735  1.00 40.81           C  
ANISOU 1012  CA  SER B  35     5210   5720   4575   -192   -457     62       C  
ATOM   1013  C   SER B  35      33.884 -28.340 -14.152  1.00 37.53           C  
ANISOU 1013  C   SER B  35     4672   5302   4285   -188   -497    143       C  
ATOM   1014  O   SER B  35      33.672 -28.998 -13.130  1.00 32.31           O  
ANISOU 1014  O   SER B  35     3922   4595   3761   -214   -464    199       O  
ATOM   1015  CB  SER B  35      35.342 -28.785 -16.147  1.00 43.99           C  
ANISOU 1015  CB  SER B  35     5623   6184   4906   -210   -556    -76       C  
ATOM   1016  OG  SER B  35      35.071 -30.178 -16.107  1.00 42.57           O  
ANISOU 1016  OG  SER B  35     5358   5926   4893   -255   -637   -177       O  
ATOM   1017  N   GLY B  36      32.926 -27.726 -14.819  1.00 34.34           N  
ANISOU 1017  N   GLY B  36     4249   4966   3832   -156   -571    166       N  
ATOM   1018  CA  GLY B  36      31.532 -27.842 -14.432  1.00 37.71           C  
ANISOU 1018  CA  GLY B  36     4539   5416   4372   -148   -618    238       C  
ATOM   1019  C   GLY B  36      30.778 -26.558 -14.709  1.00 35.13           C  
ANISOU 1019  C   GLY B  36     4225   5161   3962    -65   -646    299       C  
ATOM   1020  O   GLY B  36      31.315 -25.454 -14.675  1.00 30.53           O  
ANISOU 1020  O   GLY B  36     3744   4578   3279     -6   -606    328       O  
ATOM   1021  N   ILE B  37      29.485 -26.709 -14.995  1.00 30.24           N  
ANISOU 1021  N   ILE B  37     3488   4589   3413    -63   -737    324       N  
ATOM   1022  CA  ILE B  37      28.610 -25.589 -15.305  1.00 31.20           C  
ANISOU 1022  CA  ILE B  37     3598   4774   3484     22   -789    378       C  
ATOM   1023  C   ILE B  37      27.405 -25.655 -14.370  1.00 37.55           C  
ANISOU 1023  C   ILE B  37     4224   5633   4410     62   -773    458       C  
ATOM   1024  O   ILE B  37      26.698 -26.664 -14.354  1.00 39.26           O  
ANISOU 1024  O   ILE B  37     4302   5863   4754    -11   -822    474       O  
ATOM   1025  CB  ILE B  37      28.149 -25.597 -16.770  1.00 33.11           C  
ANISOU 1025  CB  ILE B  37     3858   5063   3658      3   -933    328       C  
ATOM   1026  CG1 ILE B  37      29.348 -25.406 -17.697  1.00 29.94           C  
ANISOU 1026  CG1 ILE B  37     3612   4672   3091    -18   -932    271       C  
ATOM   1027  CG2 ILE B  37      27.090 -24.525 -17.006  1.00 38.28           C  
ANISOU 1027  CG2 ILE B  37     4472   5774   4299     91  -1004    402       C  
ATOM   1028  CD1 ILE B  37      29.025 -25.655 -19.161  1.00 35.56           C  
ANISOU 1028  CD1 ILE B  37     4333   5478   3699    -35  -1069    199       C  
ATOM   1029  N   PRO B  38      27.146 -24.624 -13.549  1.00 41.52           N  
ANISOU 1029  N   PRO B  38     4710   6178   4888    181   -713    509       N  
ATOM   1030  CA  PRO B  38      28.001 -23.444 -13.358  1.00 43.13           C  
ANISOU 1030  CA  PRO B  38     5061   6331   4996    266   -673    492       C  
ATOM   1031  C   PRO B  38      29.342 -23.816 -12.715  1.00 38.17           C  
ANISOU 1031  C   PRO B  38     4521   5638   4342    222   -565    466       C  
ATOM   1032  O   PRO B  38      29.452 -24.921 -12.182  1.00 37.67           O  
ANISOU 1032  O   PRO B  38     4384   5585   4343    150   -510    476       O  
ATOM   1033  CB  PRO B  38      27.157 -22.547 -12.440  1.00 45.31           C  
ANISOU 1033  CB  PRO B  38     5240   6677   5300    419   -656    518       C  
ATOM   1034  CG  PRO B  38      26.196 -23.468 -11.775  1.00 42.48           C  
ANISOU 1034  CG  PRO B  38     4676   6440   5026    397   -613    572       C  
ATOM   1035  CD  PRO B  38      25.893 -24.526 -12.779  1.00 39.25           C  
ANISOU 1035  CD  PRO B  38     4232   6002   4678    253   -699    578       C  
ATOM   1036  N   PRO B  39      30.341 -22.940 -12.798  1.00 37.91           N  
ANISOU 1036  N   PRO B  39     4634   5534   4237    254   -551    448       N  
ATOM   1037  CA  PRO B  39      31.660 -23.261 -12.235  1.00 36.38           C  
ANISOU 1037  CA  PRO B  39     4521   5280   4021    212   -457    421       C  
ATOM   1038  C   PRO B  39      31.537 -23.630 -10.767  1.00 32.02           C  
ANISOU 1038  C   PRO B  39     3873   4776   3517    259   -361    433       C  
ATOM   1039  O   PRO B  39      30.867 -22.929  -9.999  1.00 27.60           O  
ANISOU 1039  O   PRO B  39     3244   4283   2961    383   -353    441       O  
ATOM   1040  CB  PRO B  39      32.448 -21.955 -12.418  1.00 39.07           C  
ANISOU 1040  CB  PRO B  39     4994   5540   4311    264   -483    427       C  
ATOM   1041  CG  PRO B  39      31.753 -21.243 -13.532  1.00 31.58           C  
ANISOU 1041  CG  PRO B  39     4058   4601   3338    283   -602    471       C  
ATOM   1042  CD  PRO B  39      30.304 -21.587 -13.383  1.00 38.04           C  
ANISOU 1042  CD  PRO B  39     4733   5507   4213    327   -636    472       C  
ATOM   1043  N   PRO B  40      32.141 -24.735 -10.341  1.00 31.67           N  
ANISOU 1043  N   PRO B  40     3810   4720   3505    173   -294    437       N  
ATOM   1044  CA  PRO B  40      31.899 -25.218  -8.977  1.00 33.94           C  
ANISOU 1044  CA  PRO B  40     3976   5092   3828    204   -207    492       C  
ATOM   1045  C   PRO B  40      32.648 -24.420  -7.926  1.00 34.67           C  
ANISOU 1045  C   PRO B  40     4130   5193   3851    311   -140    459       C  
ATOM   1046  O   PRO B  40      33.667 -23.777  -8.197  1.00 30.62           O  
ANISOU 1046  O   PRO B  40     3761   4573   3299    316   -153    399       O  
ATOM   1047  CB  PRO B  40      32.396 -26.666  -9.022  1.00 32.61           C  
ANISOU 1047  CB  PRO B  40     3779   4869   3741     65   -191    516       C  
ATOM   1048  CG  PRO B  40      33.360 -26.701 -10.144  1.00 32.45           C  
ANISOU 1048  CG  PRO B  40     3908   4736   3687      2   -235    423       C  
ATOM   1049  CD  PRO B  40      32.846 -25.733 -11.162  1.00 31.23           C  
ANISOU 1049  CD  PRO B  40     3805   4595   3465     47   -314    397       C  
ATOM   1050  N   THR B  41      32.128 -24.472  -6.703  1.00 31.27           N  
ANISOU 1050  N   THR B  41     3572   4909   3402    398    -73    502       N  
ATOM   1051  CA  THR B  41      32.870 -23.968  -5.561  1.00 30.74           C  
ANISOU 1051  CA  THR B  41     3542   4879   3260    501    -11    456       C  
ATOM   1052  C   THR B  41      33.613 -25.116  -4.893  1.00 32.71           C  
ANISOU 1052  C   THR B  41     3764   5141   3525    405     67    527       C  
ATOM   1053  O   THR B  41      33.188 -26.273  -4.939  1.00 28.92           O  
ANISOU 1053  O   THR B  41     3172   4693   3123    295     82    638       O  
ATOM   1054  CB  THR B  41      31.954 -23.263  -4.560  1.00 36.15           C  
ANISOU 1054  CB  THR B  41     4100   5760   3876    688     14    437       C  
ATOM   1055  OG1 THR B  41      30.933 -24.162  -4.113  1.00 34.24           O  
ANISOU 1055  OG1 THR B  41     3651   5710   3647    660     74    573       O  
ATOM   1056  CG2 THR B  41      31.309 -22.058  -5.222  1.00 33.82           C  
ANISOU 1056  CG2 THR B  41     3843   5415   3594    796    -89    352       C  
ATOM   1057  N   LEU B  42      34.749 -24.785  -4.298  1.00 20.38           N  
ANISOU 1057  N   LEU B  42     2302   3532   1911    443     97    465       N  
ATOM   1058  CA  LEU B  42      35.667 -25.767  -3.761  1.00 27.81           C  
ANISOU 1058  CA  LEU B  42     3246   4450   2871    355    154    519       C  
ATOM   1059  C   LEU B  42      35.691 -25.649  -2.248  1.00 32.49           C  
ANISOU 1059  C   LEU B  42     3753   5229   3361    475    227    548       C  
ATOM   1060  O   LEU B  42      35.565 -24.550  -1.699  1.00 33.32           O  
ANISOU 1060  O   LEU B  42     3874   5415   3371    641    217    445       O  
ATOM   1061  CB  LEU B  42      37.074 -25.566  -4.342  1.00 30.11           C  
ANISOU 1061  CB  LEU B  42     3712   4552   3178    294    128    429       C  
ATOM   1062  CG  LEU B  42      37.406 -26.242  -5.685  1.00 30.83           C  
ANISOU 1062  CG  LEU B  42     3862   4504   3348    150     85    420       C  
ATOM   1063  CD1 LEU B  42      36.394 -25.910  -6.766  1.00 35.48           C  
ANISOU 1063  CD1 LEU B  42     4437   5095   3950    144     17    412       C  
ATOM   1064  CD2 LEU B  42      38.802 -25.866  -6.157  1.00 23.36           C  
ANISOU 1064  CD2 LEU B  42     3062   3431   2384    117     77    340       C  
ATOM   1065  N   LYS B  43      35.804 -26.793  -1.582  1.00 27.35           N  
ANISOU 1065  N   LYS B  43     3000   4656   2735    398    285    689       N  
ATOM   1066  CA  LYS B  43      36.140 -26.853  -0.169  1.00 26.74           C  
ANISOU 1066  CA  LYS B  43     2856   4761   2542    488    356    737       C  
ATOM   1067  C   LYS B  43      37.378 -27.721  -0.038  1.00 30.56           C  
ANISOU 1067  C   LYS B  43     3408   5110   3093    370    362    779       C  
ATOM   1068  O   LYS B  43      37.467 -28.779  -0.669  1.00 29.14           O  
ANISOU 1068  O   LYS B  43     3212   4795   3063    212    336    865       O  
ATOM   1069  CB  LYS B  43      34.990 -27.416   0.668  1.00 29.50           C  
ANISOU 1069  CB  LYS B  43     2972   5394   2843    516    425    926       C  
ATOM   1070  CG  LYS B  43      33.732 -26.555   0.618  1.00 35.24           C  
ANISOU 1070  CG  LYS B  43     3605   6290   3495    657    424    875       C  
ATOM   1071  CD  LYS B  43      32.723 -26.959   1.672  1.00 53.97           C  
ANISOU 1071  CD  LYS B  43     5723   9019   5766    723    516   1059       C  
ATOM   1072  CE  LYS B  43      32.562 -25.866   2.709  1.00 64.81           C  
ANISOU 1072  CE  LYS B  43     7055  10661   6909    986    557    917       C  
ATOM   1073  NZ  LYS B  43      32.215 -24.567   2.069  1.00 66.25           N  
ANISOU 1073  NZ  LYS B  43     7339  10741   7094   1126    474    680       N  
ATOM   1074  N   TRP B  44      38.336 -27.258   0.752  1.00 24.22           N  
ANISOU 1074  N   TRP B  44     2678   4332   2192    457    378    699       N  
ATOM   1075  CA  TRP B  44      39.585 -27.964   0.966  1.00 27.35           C  
ANISOU 1075  CA  TRP B  44     3138   4610   2643    368    380    726       C  
ATOM   1076  C   TRP B  44      39.597 -28.497   2.388  1.00 26.19           C  
ANISOU 1076  C   TRP B  44     2862   4693   2395    418    442    873       C  
ATOM   1077  O   TRP B  44      39.157 -27.814   3.317  1.00 27.90           O  
ANISOU 1077  O   TRP B  44     3012   5155   2435    583    479    845       O  
ATOM   1078  CB  TRP B  44      40.784 -27.043   0.728  1.00 20.04           C  
ANISOU 1078  CB  TRP B  44     2391   3528   1696    412    337    536       C  
ATOM   1079  CG  TRP B  44      40.798 -26.375  -0.624  1.00 26.87           C  
ANISOU 1079  CG  TRP B  44     3369   4209   2631    372    278    424       C  
ATOM   1080  CD1 TRP B  44      40.092 -25.253  -1.005  1.00 25.59           C  
ANISOU 1080  CD1 TRP B  44     3232   4059   2433    465    236    338       C  
ATOM   1081  CD2 TRP B  44      41.566 -26.768  -1.767  1.00 26.05           C  
ANISOU 1081  CD2 TRP B  44     3358   3905   2634    239    250    395       C  
ATOM   1082  NE1 TRP B  44      40.380 -24.937  -2.310  1.00 28.69           N  
ANISOU 1082  NE1 TRP B  44     3728   4272   2901    382    183    289       N  
ATOM   1083  CE2 TRP B  44      41.278 -25.850  -2.802  1.00 27.54           C  
ANISOU 1083  CE2 TRP B  44     3621   4016   2826    248    199    317       C  
ATOM   1084  CE3 TRP B  44      42.462 -27.812  -2.021  1.00 26.21           C  
ANISOU 1084  CE3 TRP B  44     3395   3820   2743    125    257    423       C  
ATOM   1085  CZ2 TRP B  44      41.856 -25.946  -4.068  1.00 24.69           C  
ANISOU 1085  CZ2 TRP B  44     3342   3517   2522    146    171    282       C  
ATOM   1086  CZ3 TRP B  44      43.038 -27.900  -3.283  1.00 23.22           C  
ANISOU 1086  CZ3 TRP B  44     3099   3297   2427     40    227    352       C  
ATOM   1087  CH2 TRP B  44      42.732 -26.974  -4.286  1.00 23.62           C  
ANISOU 1087  CH2 TRP B  44     3214   3314   2447     50    191    289       C  
ATOM   1088  N   GLU B  45      40.073 -29.726   2.548  1.00 24.12           N  
ANISOU 1088  N   GLU B  45     2556   4366   2245    286    444   1029       N  
ATOM   1089  CA  GLU B  45      40.109 -30.382   3.846  1.00 24.04           C  
ANISOU 1089  CA  GLU B  45     2407   4571   2154    305    495   1226       C  
ATOM   1090  C   GLU B  45      41.460 -31.035   4.062  1.00 26.32           C  
ANISOU 1090  C   GLU B  45     2773   4703   2525    232    464   1241       C  
ATOM   1091  O   GLU B  45      42.135 -31.439   3.110  1.00 25.48           O  
ANISOU 1091  O   GLU B  45     2769   4320   2592    121    408   1164       O  
ATOM   1092  CB  GLU B  45      39.037 -31.455   3.977  1.00 26.47           C  
ANISOU 1092  CB  GLU B  45     2511   4980   2567    198    508   1499       C  
ATOM   1093  CG  GLU B  45      37.630 -30.935   4.035  1.00 36.16           C  
ANISOU 1093  CG  GLU B  45     3614   6412   3714    280    538   1515       C  
ATOM   1094  CD  GLU B  45      36.628 -32.058   4.048  1.00 52.85           C  
ANISOU 1094  CD  GLU B  45     5530   8557   5993    149    511   1768       C  
ATOM   1095  OE1 GLU B  45      37.044 -33.213   3.808  1.00 52.92           O  
ANISOU 1095  OE1 GLU B  45     5523   8374   6211    -14    451   1903       O  
ATOM   1096  OE2 GLU B  45      35.432 -31.791   4.295  1.00 68.01           O  
ANISOU 1096  OE2 GLU B  45     7309  10683   7848    214    532   1827       O  
ATOM   1097  N   LYS B  46      41.839 -31.144   5.330  1.00 28.03           N  
ANISOU 1097  N   LYS B  46     2928   5107   2617    306    491   1321       N  
ATOM   1098  CA  LYS B  46      42.973 -31.954   5.751  1.00 28.93           C  
ANISOU 1098  CA  LYS B  46     3064   5120   2809    235    461   1402       C  
ATOM   1099  C   LYS B  46      42.452 -33.001   6.727  1.00 33.66           C  
ANISOU 1099  C   LYS B  46     3469   5855   3466    190    449   1643       C  
ATOM   1100  O   LYS B  46      41.993 -32.659   7.822  1.00 34.97           O  
ANISOU 1100  O   LYS B  46     3529   6287   3472    310    476   1666       O  
ATOM   1101  CB  LYS B  46      44.066 -31.103   6.393  1.00 29.69           C  
ANISOU 1101  CB  LYS B  46     3276   5263   2744    366    457   1226       C  
ATOM   1102  CG  LYS B  46      45.352 -31.880   6.611  1.00 30.46           C  
ANISOU 1102  CG  LYS B  46     3416   5216   2940    289    417   1284       C  
ATOM   1103  CD  LYS B  46      46.225 -31.280   7.693  1.00 36.31           C  
ANISOU 1103  CD  LYS B  46     4198   6096   3501    424    408   1189       C  
ATOM   1104  CE  LYS B  46      47.499 -32.105   7.859  1.00 37.39           C  
ANISOU 1104  CE  LYS B  46     4368   6077   3761    341    359   1254       C  
ATOM   1105  NZ  LYS B  46      47.734 -32.446   9.284  1.00 35.32           N  
ANISOU 1105  NZ  LYS B  46     4004   6033   3382    407    354   1376       N  
ATOM   1106  N   ASP B  47      42.498 -34.268   6.316  1.00 32.99           N  
ANISOU 1106  N   ASP B  47     3326   5588   3622     23    393   1819       N  
ATOM   1107  CA  ASP B  47      42.115 -35.393   7.166  1.00 41.97           C  
ANISOU 1107  CA  ASP B  47     4277   6809   4860    -40    351   2073       C  
ATOM   1108  C   ASP B  47      40.695 -35.223   7.713  1.00 42.96           C  
ANISOU 1108  C   ASP B  47     4224   7210   4889     18    386   2186       C  
ATOM   1109  O   ASP B  47      40.437 -35.397   8.905  1.00 40.91           O  
ANISOU 1109  O   ASP B  47     3820   7202   4523     82    399   2320       O  
ATOM   1110  CB  ASP B  47      43.133 -35.582   8.296  1.00 45.77           C  
ANISOU 1110  CB  ASP B  47     4755   7377   5257     13    345   2111       C  
ATOM   1111  CG  ASP B  47      44.541 -35.862   7.775  1.00 50.71           C  
ANISOU 1111  CG  ASP B  47     5536   7731   6001    -48    300   2029       C  
ATOM   1112  OD1 ASP B  47      44.730 -36.869   7.054  1.00 51.64           O  
ANISOU 1112  OD1 ASP B  47     5647   7586   6387   -190    220   2111       O  
ATOM   1113  OD2 ASP B  47      45.460 -35.069   8.074  1.00 48.18           O  
ANISOU 1113  OD2 ASP B  47     5338   7453   5517     53    328   1872       O  
ATOM   1114  N   GLY B  48      39.767 -34.870   6.824  1.00 35.94           N  
ANISOU 1114  N   GLY B  48     3335   6289   4032     -1    399   2137       N  
ATOM   1115  CA  GLY B  48      38.366 -34.756   7.176  1.00 35.82           C  
ANISOU 1115  CA  GLY B  48     3145   6514   3953     43    421   2253       C  
ATOM   1116  C   GLY B  48      37.965 -33.467   7.857  1.00 39.60           C  
ANISOU 1116  C   GLY B  48     3615   7288   4143    252    498   2104       C  
ATOM   1117  O   GLY B  48      36.795 -33.317   8.222  1.00 46.38           O  
ANISOU 1117  O   GLY B  48     4318   8379   4926    312    518   2196       O  
ATOM   1118  N   GLN B  49      38.889 -32.536   8.041  1.00 40.15           N  
ANISOU 1118  N   GLN B  49     3842   7351   4063    372    524   1872       N  
ATOM   1119  CA  GLN B  49      38.642 -31.277   8.713  1.00 38.02           C  
ANISOU 1119  CA  GLN B  49     3575   7321   3548    588    560   1687       C  
ATOM   1120  C   GLN B  49      38.874 -30.119   7.752  1.00 36.87           C  
ANISOU 1120  C   GLN B  49     3618   7023   3366    655    562   1414       C  
ATOM   1121  O   GLN B  49      39.782 -30.176   6.915  1.00 36.67           O  
ANISOU 1121  O   GLN B  49     3758   6737   3438    565    543   1335       O  
ATOM   1122  CB  GLN B  49      39.571 -31.120   9.919  1.00 47.47           C  
ANISOU 1122  CB  GLN B  49     4779   8649   4607    693    556   1640       C  
ATOM   1123  CG  GLN B  49      38.899 -30.822  11.233  1.00 63.13           C  
ANISOU 1123  CG  GLN B  49     6581  11012   6392    858    575   1687       C  
ATOM   1124  CD  GLN B  49      39.925 -30.633  12.327  1.00 69.06           C  
ANISOU 1124  CD  GLN B  49     7354  11874   7011    961    563   1615       C  
ATOM   1125  OE1 GLN B  49      40.981 -31.266  12.305  1.00 58.90           O  
ANISOU 1125  OE1 GLN B  49     6144  10415   5819    854    544   1670       O  
ATOM   1126  NE2 GLN B  49      39.629 -29.758  13.284  1.00 78.24           N  
ANISOU 1126  NE2 GLN B  49     8444  13326   7956   1176    563   1484       N  
ATOM   1127  N   PRO B  50      38.086 -29.051   7.862  1.00 32.89           N  
ANISOU 1127  N   PRO B  50     3089   6684   2724    819    573   1269       N  
ATOM   1128  CA  PRO B  50      38.289 -27.892   6.984  1.00 33.38           C  
ANISOU 1128  CA  PRO B  50     3323   6599   2761    896    554   1014       C  
ATOM   1129  C   PRO B  50      39.719 -27.383   7.081  1.00 38.27           C  
ANISOU 1129  C   PRO B  50     4125   7062   3353    934    514    830       C  
ATOM   1130  O   PRO B  50      40.312 -27.339   8.160  1.00 37.11           O  
ANISOU 1130  O   PRO B  50     3956   7027   3117   1015    497    803       O  
ATOM   1131  CB  PRO B  50      37.286 -26.864   7.517  1.00 42.64           C  
ANISOU 1131  CB  PRO B  50     4405   8020   3778   1107    548    890       C  
ATOM   1132  CG  PRO B  50      36.268 -27.675   8.268  1.00 39.18           C  
ANISOU 1132  CG  PRO B  50     3732   7845   3309   1088    584   1136       C  
ATOM   1133  CD  PRO B  50      37.023 -28.825   8.853  1.00 32.78           C  
ANISOU 1133  CD  PRO B  50     2883   7010   2564    959    590   1330       C  
ATOM   1134  N   LEU B  51      40.284 -27.024   5.932  1.00 30.92           N  
ANISOU 1134  N   LEU B  51     3367   5883   2497    873    491    718       N  
ATOM   1135  CA  LEU B  51      41.681 -26.612   5.886  1.00 30.94           C  
ANISOU 1135  CA  LEU B  51     3541   5719   2497    885    443    568       C  
ATOM   1136  C   LEU B  51      41.825 -25.203   6.443  1.00 36.03           C  
ANISOU 1136  C   LEU B  51     4243   6422   3026   1097    372    308       C  
ATOM   1137  O   LEU B  51      41.163 -24.271   5.975  1.00 39.12           O  
ANISOU 1137  O   LEU B  51     4661   6803   3399   1197    338    171       O  
ATOM   1138  CB  LEU B  51      42.208 -26.681   4.454  1.00 28.13           C  
ANISOU 1138  CB  LEU B  51     3329   5015   2343    725    398    518       C  
ATOM   1139  CG  LEU B  51      43.690 -26.344   4.259  1.00 26.75           C  
ANISOU 1139  CG  LEU B  51     3310   4617   2237    693    335    383       C  
ATOM   1140  CD1 LEU B  51      44.562 -27.377   4.968  1.00 31.78           C  
ANISOU 1140  CD1 LEU B  51     3913   5283   2880    628    360    509       C  
ATOM   1141  CD2 LEU B  51      44.023 -26.283   2.787  1.00 27.32           C  
ANISOU 1141  CD2 LEU B  51     3493   4406   2482    554    299    334       C  
ATOM   1142  N   SER B  52      42.682 -25.047   7.446  1.00 42.35           N  
ANISOU 1142  N   SER B  52     5056   7273   3763   1173    332    234       N  
ATOM   1143  CA  SER B  52      43.009 -23.734   7.987  1.00 44.21           C  
ANISOU 1143  CA  SER B  52     5352   7516   3930   1366    228    -32       C  
ATOM   1144  C   SER B  52      44.288 -23.250   7.316  1.00 36.85           C  
ANISOU 1144  C   SER B  52     4615   6302   3085   1318    148   -174       C  
ATOM   1145  O   SER B  52      45.332 -23.903   7.416  1.00 40.40           O  
ANISOU 1145  O   SER B  52     5111   6678   3561   1217    159   -102       O  
ATOM   1146  CB  SER B  52      43.179 -23.792   9.503  1.00 44.97           C  
ANISOU 1146  CB  SER B  52     5335   7850   3903   1491    213    -40       C  
ATOM   1147  OG  SER B  52      44.267 -24.623   9.842  1.00 54.50           O  
ANISOU 1147  OG  SER B  52     6569   9010   5127   1384    232     67       O  
ATOM   1148  N   LEU B  53      44.202 -22.112   6.628  1.00 32.43           N  
ANISOU 1148  N   LEU B  53     4155   5562   2605   1376     50   -360       N  
ATOM   1149  CA  LEU B  53      45.314 -21.681   5.789  1.00 40.34           C  
ANISOU 1149  CA  LEU B  53     5304   6214   3808   1250    -42   -427       C  
ATOM   1150  C   LEU B  53      46.477 -21.151   6.615  1.00 38.30           C  
ANISOU 1150  C   LEU B  53     5103   5915   3536   1337   -150   -587       C  
ATOM   1151  O   LEU B  53      47.626 -21.208   6.163  1.00 46.09           O  
ANISOU 1151  O   LEU B  53     6173   6671   4667   1201   -191   -574       O  
ATOM   1152  CB  LEU B  53      44.842 -20.623   4.792  1.00 30.72           C  
ANISOU 1152  CB  LEU B  53     4154   4795   2726   1258   -132   -525       C  
ATOM   1153  CG  LEU B  53      43.656 -21.041   3.918  1.00 37.15           C  
ANISOU 1153  CG  LEU B  53     4914   5645   3558   1183    -48   -388       C  
ATOM   1154  CD1 LEU B  53      43.330 -19.955   2.907  1.00 40.07           C  
ANISOU 1154  CD1 LEU B  53     5359   5800   4068   1185   -156   -470       C  
ATOM   1155  CD2 LEU B  53      43.947 -22.365   3.216  1.00 32.58           C  
ANISOU 1155  CD2 LEU B  53     4329   5006   3044    959     61   -179       C  
ATOM   1156  N   GLY B  54      46.209 -20.647   7.815  1.00 39.84           N  
ANISOU 1156  N   GLY B  54     5234   6332   3571   1557   -203   -735       N  
ATOM   1157  CA  GLY B  54      47.242 -20.055   8.630  1.00 41.79           C  
ANISOU 1157  CA  GLY B  54     5515   6520   3843   1638   -336   -898       C  
ATOM   1158  C   GLY B  54      48.000 -18.985   7.871  1.00 43.56           C  
ANISOU 1158  C   GLY B  54     5885   6400   4266   1615   -506  -1074       C  
ATOM   1159  O   GLY B  54      47.482 -18.363   6.939  1.00 46.00           O  
ANISOU 1159  O   GLY B  54     6233   6532   4712   1580   -549  -1088       O  
ATOM   1160  N   PRO B  55      49.258 -18.753   8.250  1.00 42.29           N  
ANISOU 1160  N   PRO B  55     5777   6108   4182   1595   -613  -1159       N  
ATOM   1161  CA  PRO B  55      50.074 -17.767   7.539  1.00 43.76           C  
ANISOU 1161  CA  PRO B  55     6063   5932   4634   1515   -783  -1254       C  
ATOM   1162  C   PRO B  55      50.856 -18.328   6.362  1.00 38.40           C  
ANISOU 1162  C   PRO B  55     5429   5032   4130   1237   -704  -1038       C  
ATOM   1163  O   PRO B  55      51.454 -17.538   5.619  1.00 39.84           O  
ANISOU 1163  O   PRO B  55     5669   4935   4535   1141   -822  -1052       O  
ATOM   1164  CB  PRO B  55      51.029 -17.282   8.638  1.00 50.08           C  
ANISOU 1164  CB  PRO B  55     6849   6730   5448   1617   -935  -1416       C  
ATOM   1165  CG  PRO B  55      51.265 -18.524   9.458  1.00 47.95           C  
ANISOU 1165  CG  PRO B  55     6517   6739   4964   1615   -786  -1298       C  
ATOM   1166  CD  PRO B  55      49.964 -19.314   9.417  1.00 46.63           C  
ANISOU 1166  CD  PRO B  55     6266   6832   4619   1633   -596  -1140       C  
ATOM   1167  N   ASN B  56      50.868 -19.651   6.165  1.00 33.81           N  
ANISOU 1167  N   ASN B  56     4810   4573   3463   1112   -519   -837       N  
ATOM   1168  CA  ASN B  56      51.772 -20.279   5.211  1.00 27.69           C  
ANISOU 1168  CA  ASN B  56     4064   3629   2828    885   -451   -677       C  
ATOM   1169  C   ASN B  56      51.089 -20.936   4.021  1.00 21.60           C  
ANISOU 1169  C   ASN B  56     3285   2843   2080    746   -316   -507       C  
ATOM   1170  O   ASN B  56      51.788 -21.459   3.146  1.00 27.23           O  
ANISOU 1170  O   ASN B  56     4012   3442   2891    578   -259   -398       O  
ATOM   1171  CB  ASN B  56      52.644 -21.327   5.913  1.00 26.57           C  
ANISOU 1171  CB  ASN B  56     3888   3588   2620    849   -388   -612       C  
ATOM   1172  CG  ASN B  56      51.831 -22.456   6.515  1.00 27.23           C  
ANISOU 1172  CG  ASN B  56     3893   3937   2516    893   -252   -494       C  
ATOM   1173  OD1 ASN B  56      50.847 -22.228   7.217  1.00 32.32           O  
ANISOU 1173  OD1 ASN B  56     4490   4791   3000   1052   -247   -546       O  
ATOM   1174  ND2 ASN B  56      52.250 -23.684   6.251  1.00 24.76           N  
ANISOU 1174  ND2 ASN B  56     3552   3623   2234    757   -150   -328       N  
ATOM   1175  N   ILE B  57      49.763 -20.933   3.945  1.00 21.11           N  
ANISOU 1175  N   ILE B  57     3189   2905   1927    820   -268   -493       N  
ATOM   1176  CA  ILE B  57      49.062 -21.613   2.862  1.00 21.88           C  
ANISOU 1176  CA  ILE B  57     3271   2999   2044    696   -156   -344       C  
ATOM   1177  C   ILE B  57      48.335 -20.589   2.007  1.00 25.77           C  
ANISOU 1177  C   ILE B  57     3800   3381   2610    711   -226   -381       C  
ATOM   1178  O   ILE B  57      47.703 -19.663   2.529  1.00 23.56           O  
ANISOU 1178  O   ILE B  57     3516   3135   2302    873   -319   -510       O  
ATOM   1179  CB  ILE B  57      48.071 -22.670   3.386  1.00 26.22           C  
ANISOU 1179  CB  ILE B  57     3727   3787   2450    734    -37   -243       C  
ATOM   1180  CG1 ILE B  57      48.788 -23.664   4.299  1.00 28.63           C  
ANISOU 1180  CG1 ILE B  57     3988   4198   2693    720     12   -176       C  
ATOM   1181  CG2 ILE B  57      47.421 -23.402   2.224  1.00 22.48           C  
ANISOU 1181  CG2 ILE B  57     3236   3276   2031    596     48   -107       C  
ATOM   1182  CD1 ILE B  57      47.883 -24.767   4.811  1.00 22.85           C  
ANISOU 1182  CD1 ILE B  57     3143   3689   1850    728    118    -20       C  
ATOM   1183  N   GLU B  58      48.417 -20.761   0.689  1.00 21.56           N  
ANISOU 1183  N   GLU B  58     3295   2730   2167    555   -190   -273       N  
ATOM   1184  CA  GLU B  58      47.625 -19.941  -0.213  1.00 30.20           C  
ANISOU 1184  CA  GLU B  58     4413   3743   3318    555   -246   -264       C  
ATOM   1185  C   GLU B  58      47.029 -20.817  -1.301  1.00 25.40           C  
ANISOU 1185  C   GLU B  58     3783   3183   2685    436   -136   -132       C  
ATOM   1186  O   GLU B  58      47.673 -21.750  -1.791  1.00 24.26           O  
ANISOU 1186  O   GLU B  58     3635   3035   2549    311    -56    -58       O  
ATOM   1187  CB  GLU B  58      48.448 -18.798  -0.823  1.00 28.42           C  
ANISOU 1187  CB  GLU B  58     4249   3293   3255    496   -379   -272       C  
ATOM   1188  CG  GLU B  58      49.520 -19.210  -1.790  1.00 42.46           C  
ANISOU 1188  CG  GLU B  58     6042   4994   5099    308   -325   -148       C  
ATOM   1189  CD  GLU B  58      50.099 -18.025  -2.548  1.00 50.80           C  
ANISOU 1189  CD  GLU B  58     7129   5857   6315    232   -452    -92       C  
ATOM   1190  OE1 GLU B  58      51.303 -18.058  -2.880  1.00 55.10           O  
ANISOU 1190  OE1 GLU B  58     7667   6335   6933    113   -449    -24       O  
ATOM   1191  OE2 GLU B  58      49.348 -17.060  -2.810  1.00 51.64           O  
ANISOU 1191  OE2 GLU B  58     7254   5881   6487    288   -562   -102       O  
ATOM   1192  N   ILE B  59      45.778 -20.531  -1.638  1.00 22.02           N  
ANISOU 1192  N   ILE B  59     3333   2805   2229    492   -146   -125       N  
ATOM   1193  CA  ILE B  59      45.087 -21.165  -2.749  1.00 20.75           C  
ANISOU 1193  CA  ILE B  59     3151   2676   2056    393    -80    -22       C  
ATOM   1194  C   ILE B  59      45.066 -20.174  -3.899  1.00 26.40           C  
ANISOU 1194  C   ILE B  59     3922   3259   2850    343   -167     13       C  
ATOM   1195  O   ILE B  59      44.691 -19.008  -3.717  1.00 26.63           O  
ANISOU 1195  O   ILE B  59     3970   3214   2934    440   -282    -42       O  
ATOM   1196  CB  ILE B  59      43.666 -21.595  -2.351  1.00 28.72           C  
ANISOU 1196  CB  ILE B  59     4076   3851   2985    478    -35    -11       C  
ATOM   1197  CG1 ILE B  59      43.734 -22.530  -1.140  1.00 36.34           C  
ANISOU 1197  CG1 ILE B  59     4968   4968   3871    520     45      1       C  
ATOM   1198  CG2 ILE B  59      42.952 -22.253  -3.536  1.00 20.59           C  
ANISOU 1198  CG2 ILE B  59     3023   2836   1964    372      7     81       C  
ATOM   1199  CD1 ILE B  59      42.418 -22.738  -0.449  1.00 34.20           C  
ANISOU 1199  CD1 ILE B  59     4585   4901   3507    631     84     22       C  
ATOM   1200  N   ILE B  60      45.489 -20.628  -5.074  1.00 26.64           N  
ANISOU 1200  N   ILE B  60     3967   3268   2886    201   -122    104       N  
ATOM   1201  CA  ILE B  60      45.562 -19.786  -6.260  1.00 28.56           C  
ANISOU 1201  CA  ILE B  60     4246   3426   3178    133   -191    185       C  
ATOM   1202  C   ILE B  60      44.633 -20.364  -7.309  1.00 30.48           C  
ANISOU 1202  C   ILE B  60     4465   3766   3351     87   -147    244       C  
ATOM   1203  O   ILE B  60      44.709 -21.557  -7.622  1.00 28.54           O  
ANISOU 1203  O   ILE B  60     4189   3606   3046     26    -56    243       O  
ATOM   1204  CB  ILE B  60      46.997 -19.684  -6.807  1.00 35.66           C  
ANISOU 1204  CB  ILE B  60     5168   4262   4119     11   -183    253       C  
ATOM   1205  CG1 ILE B  60      47.954 -19.221  -5.707  1.00 43.79           C  
ANISOU 1205  CG1 ILE B  60     6213   5192   5233     52   -238    184       C  
ATOM   1206  CG2 ILE B  60      47.036 -18.755  -8.005  1.00 42.91           C  
ANISOU 1206  CG2 ILE B  60     6101   5123   5078    -64   -257    385       C  
ATOM   1207  CD1 ILE B  60      49.344 -18.868  -6.215  1.00 53.08           C  
ANISOU 1207  CD1 ILE B  60     7392   6290   6486    -69   -256    270       C  
ATOM   1208  N   HIS B  61      43.768 -19.514  -7.853  1.00 22.57           N  
ANISOU 1208  N   HIS B  61     3471   2735   2369    123   -232    284       N  
ATOM   1209  CA  HIS B  61      42.815 -19.876  -8.890  1.00 17.77           C  
ANISOU 1209  CA  HIS B  61     2839   2215   1699     90   -220    338       C  
ATOM   1210  C   HIS B  61      43.178 -19.083 -10.135  1.00 22.39           C  
ANISOU 1210  C   HIS B  61     3457   2758   2291      7   -286    464       C  
ATOM   1211  O   HIS B  61      43.271 -17.852 -10.077  1.00 19.56           O  
ANISOU 1211  O   HIS B  61     3126   2272   2033     34   -401    516       O  
ATOM   1212  CB  HIS B  61      41.391 -19.577  -8.408  1.00 18.22           C  
ANISOU 1212  CB  HIS B  61     2855   2303   1765    214   -266    292       C  
ATOM   1213  CG  HIS B  61      40.311 -19.913  -9.386  1.00 27.41           C  
ANISOU 1213  CG  HIS B  61     3984   3551   2880    189   -273    340       C  
ATOM   1214  ND1 HIS B  61      40.385 -20.983 -10.252  1.00 29.54           N  
ANISOU 1214  ND1 HIS B  61     4236   3908   3079     88   -210    362       N  
ATOM   1215  CD2 HIS B  61      39.109 -19.329  -9.608  1.00 21.71           C  
ANISOU 1215  CD2 HIS B  61     3233   2842   2176    266   -349    352       C  
ATOM   1216  CE1 HIS B  61      39.283 -21.032 -10.981  1.00 25.51           C  
ANISOU 1216  CE1 HIS B  61     3692   3459   2541     96   -252    389       C  
ATOM   1217  NE2 HIS B  61      38.496 -20.034 -10.616  1.00 25.11           N  
ANISOU 1217  NE2 HIS B  61     3632   3366   2543    198   -332    395       N  
ATOM   1218  N   GLU B  62      43.404 -19.792 -11.252  1.00 19.79           N  
ANISOU 1218  N   GLU B  62     3116   2545   1860    -89   -224    517       N  
ATOM   1219  CA  GLU B  62      43.746 -19.194 -12.540  1.00 21.62           C  
ANISOU 1219  CA  GLU B  62     3355   2814   2045   -172   -264    665       C  
ATOM   1220  C   GLU B  62      42.861 -19.793 -13.622  1.00 20.67           C  
ANISOU 1220  C   GLU B  62     3208   2847   1797   -185   -253    672       C  
ATOM   1221  O   GLU B  62      42.587 -20.996 -13.612  1.00 29.15           O  
ANISOU 1221  O   GLU B  62     4255   4009   2813   -179   -185    558       O  
ATOM   1222  CB  GLU B  62      45.221 -19.427 -12.899  1.00 21.62           C  
ANISOU 1222  CB  GLU B  62     3347   2861   2006   -270   -193    717       C  
ATOM   1223  CG  GLU B  62      46.182 -19.074 -11.785  1.00 25.65           C  
ANISOU 1223  CG  GLU B  62     3873   3230   2641   -264   -200    684       C  
ATOM   1224  CD  GLU B  62      47.637 -19.322 -12.137  1.00 32.66           C  
ANISOU 1224  CD  GLU B  62     4733   4176   3500   -361   -128    740       C  
ATOM   1225  OE1 GLU B  62      47.929 -19.775 -13.264  1.00 35.25           O  
ANISOU 1225  OE1 GLU B  62     5022   4679   3691   -423    -63    799       O  
ATOM   1226  OE2 GLU B  62      48.496 -19.042 -11.281  1.00 39.56           O  
ANISOU 1226  OE2 GLU B  62     5613   4936   4482   -365   -143    719       O  
ATOM   1227  N   GLY B  63      42.424 -18.960 -14.559  1.00 23.17           N  
ANISOU 1227  N   GLY B  63     3529   3188   2086   -203   -339    809       N  
ATOM   1228  CA  GLY B  63      41.484 -19.459 -15.547  1.00 23.74           C  
ANISOU 1228  CA  GLY B  63     3575   3410   2036   -200   -351    804       C  
ATOM   1229  C   GLY B  63      40.214 -19.908 -14.841  1.00 25.80           C  
ANISOU 1229  C   GLY B  63     3813   3633   2357   -111   -369    679       C  
ATOM   1230  O   GLY B  63      39.961 -19.585 -13.678  1.00 32.29           O  
ANISOU 1230  O   GLY B  63     4637   4335   3296    -39   -381    626       O  
ATOM   1231  N   LEU B  64      39.406 -20.682 -15.555  1.00 23.64           N  
ANISOU 1231  N   LEU B  64     3503   3484   1997   -113   -373    629       N  
ATOM   1232  CA  LEU B  64      38.201 -21.208 -14.925  1.00 33.84           C  
ANISOU 1232  CA  LEU B  64     4743   4757   3356    -48   -387    536       C  
ATOM   1233  C   LEU B  64      38.443 -22.497 -14.153  1.00 28.85           C  
ANISOU 1233  C   LEU B  64     4075   4126   2760    -60   -297    414       C  
ATOM   1234  O   LEU B  64      37.778 -22.730 -13.139  1.00 31.34           O  
ANISOU 1234  O   LEU B  64     4342   4404   3162     -7   -284    378       O  
ATOM   1235  CB  LEU B  64      37.102 -21.437 -15.969  1.00 39.25           C  
ANISOU 1235  CB  LEU B  64     5389   5552   3972    -45   -462    544       C  
ATOM   1236  CG  LEU B  64      35.976 -20.401 -15.935  1.00 51.31           C  
ANISOU 1236  CG  LEU B  64     6901   7032   5562     29   -566    619       C  
ATOM   1237  CD1 LEU B  64      36.433 -19.090 -16.574  1.00 58.16           C  
ANISOU 1237  CD1 LEU B  64     7826   7860   6412     15   -643    780       C  
ATOM   1238  CD2 LEU B  64      34.741 -20.930 -16.625  1.00 52.16           C  
ANISOU 1238  CD2 LEU B  64     6944   7242   5634     41   -631    588       C  
ATOM   1239  N   ASP B  65      39.390 -23.334 -14.584  1.00 29.73           N  
ANISOU 1239  N   ASP B  65     4196   4289   2811   -123   -241    358       N  
ATOM   1240  CA  ASP B  65      39.501 -24.681 -14.035  1.00 27.50           C  
ANISOU 1240  CA  ASP B  65     3867   3992   2588   -140   -191    246       C  
ATOM   1241  C   ASP B  65      40.720 -24.923 -13.155  1.00 26.69           C  
ANISOU 1241  C   ASP B  65     3789   3822   2530   -154   -109    223       C  
ATOM   1242  O   ASP B  65      40.775 -25.961 -12.491  1.00 26.04           O  
ANISOU 1242  O   ASP B  65     3664   3704   2526   -163    -78    160       O  
ATOM   1243  CB  ASP B  65      39.524 -25.716 -15.167  1.00 34.47           C  
ANISOU 1243  CB  ASP B  65     4724   4974   3400   -177   -220    145       C  
ATOM   1244  CG  ASP B  65      38.205 -25.798 -15.920  1.00 44.90           C  
ANISOU 1244  CG  ASP B  65     6002   6359   4701   -162   -317    136       C  
ATOM   1245  OD1 ASP B  65      37.336 -24.921 -15.728  1.00 42.73           O  
ANISOU 1245  OD1 ASP B  65     5723   6067   4448   -126   -357    230       O  
ATOM   1246  OD2 ASP B  65      38.039 -26.758 -16.705  1.00 51.21           O  
ANISOU 1246  OD2 ASP B  65     6765   7222   5471   -178   -368     19       O  
ATOM   1247  N   TYR B  66      41.696 -24.022 -13.130  1.00 22.07           N  
ANISOU 1247  N   TYR B  66     3260   3211   1914   -164    -86    285       N  
ATOM   1248  CA  TYR B  66      42.962 -24.314 -12.471  1.00 17.37           C  
ANISOU 1248  CA  TYR B  66     2681   2568   1352   -185    -16    254       C  
ATOM   1249  C   TYR B  66      42.978 -23.798 -11.038  1.00 24.37           C  
ANISOU 1249  C   TYR B  66     3579   3348   2332   -132     -9    271       C  
ATOM   1250  O   TYR B  66      42.598 -22.652 -10.773  1.00 23.78           O  
ANISOU 1250  O   TYR B  66     3529   3223   2282    -83    -64    325       O  
ATOM   1251  CB  TYR B  66      44.125 -23.714 -13.255  1.00 17.90           C  
ANISOU 1251  CB  TYR B  66     2778   2684   1339   -236      3    318       C  
ATOM   1252  CG  TYR B  66      45.481 -23.910 -12.611  1.00 29.45           C  
ANISOU 1252  CG  TYR B  66     4246   4099   2844   -259     68    294       C  
ATOM   1253  CD1 TYR B  66      46.240 -25.041 -12.882  1.00 39.74           C  
ANISOU 1253  CD1 TYR B  66     5516   5466   4116   -280    127    193       C  
ATOM   1254  CD2 TYR B  66      45.999 -22.969 -11.723  1.00 24.63           C  
ANISOU 1254  CD2 TYR B  66     3669   3373   2319   -250     53    355       C  
ATOM   1255  CE1 TYR B  66      47.483 -25.224 -12.304  1.00 36.25           C  
ANISOU 1255  CE1 TYR B  66     5069   4984   3719   -296    180    174       C  
ATOM   1256  CE2 TYR B  66      47.244 -23.145 -11.142  1.00 32.79           C  
ANISOU 1256  CE2 TYR B  66     4700   4365   3395   -273    100    333       C  
ATOM   1257  CZ  TYR B  66      47.980 -24.275 -11.446  1.00 32.68           C  
ANISOU 1257  CZ  TYR B  66     4650   4427   3342   -299    170    252       C  
ATOM   1258  OH  TYR B  66      49.214 -24.467 -10.880  1.00 32.45           O  
ANISOU 1258  OH  TYR B  66     4608   4360   3360   -317    213    230       O  
ATOM   1259  N   TYR B  67      43.452 -24.643 -10.122  1.00 16.07           N  
ANISOU 1259  N   TYR B  67     2504   2268   1332   -130     45    216       N  
ATOM   1260  CA  TYR B  67      43.629 -24.290  -8.724  1.00 15.64           C  
ANISOU 1260  CA  TYR B  67     2453   2156   1333    -70     58    216       C  
ATOM   1261  C   TYR B  67      44.925 -24.897  -8.226  1.00 27.60           C  
ANISOU 1261  C   TYR B  67     3973   3638   2874   -104    111    182       C  
ATOM   1262  O   TYR B  67      45.227 -26.055  -8.534  1.00 30.69           O  
ANISOU 1262  O   TYR B  67     4334   4049   3279   -150    143    141       O  
ATOM   1263  CB  TYR B  67      42.485 -24.803  -7.851  1.00 15.66           C  
ANISOU 1263  CB  TYR B  67     2385   2202   1364    -13     64    216       C  
ATOM   1264  CG  TYR B  67      41.135 -24.186  -8.121  1.00 20.33           C  
ANISOU 1264  CG  TYR B  67     2949   2835   1940     42     12    243       C  
ATOM   1265  CD1 TYR B  67      40.325 -24.666  -9.143  1.00 19.33           C  
ANISOU 1265  CD1 TYR B  67     2789   2751   1803     -2    -18    253       C  
ATOM   1266  CD2 TYR B  67      40.652 -23.147  -7.323  1.00 21.66           C  
ANISOU 1266  CD2 TYR B  67     3117   3005   2110    154    -21    239       C  
ATOM   1267  CE1 TYR B  67      39.074 -24.120  -9.380  1.00 23.05           C  
ANISOU 1267  CE1 TYR B  67     3225   3264   2269     51    -72    281       C  
ATOM   1268  CE2 TYR B  67      39.404 -22.591  -7.552  1.00 19.56           C  
ANISOU 1268  CE2 TYR B  67     2812   2780   1839    221    -75    253       C  
ATOM   1269  CZ  TYR B  67      38.622 -23.080  -8.580  1.00 24.90           C  
ANISOU 1269  CZ  TYR B  67     3454   3498   2509    162    -95    286       C  
ATOM   1270  OH  TYR B  67      37.383 -22.534  -8.812  1.00 24.95           O  
ANISOU 1270  OH  TYR B  67     3414   3547   2518    229   -154    304       O  
ATOM   1271  N   ALA B  68      45.680 -24.124  -7.446  1.00 21.92           N  
ANISOU 1271  N   ALA B  68     3289   2859   2179    -73    103    185       N  
ATOM   1272  CA  ALA B  68      46.907 -24.623  -6.840  1.00 18.65           C  
ANISOU 1272  CA  ALA B  68     2875   2414   1797    -95    144    155       C  
ATOM   1273  C   ALA B  68      46.870 -24.384  -5.338  1.00 23.52           C  
ANISOU 1273  C   ALA B  68     3486   3017   2434     -9    133    135       C  
ATOM   1274  O   ALA B  68      46.426 -23.332  -4.873  1.00 27.74           O  
ANISOU 1274  O   ALA B  68     4041   3533   2965     70     75    123       O  
ATOM   1275  CB  ALA B  68      48.157 -23.972  -7.452  1.00 16.24           C  
ANISOU 1275  CB  ALA B  68     2604   2071   1497   -155    138    178       C  
ATOM   1276  N   LEU B  69      47.328 -25.370  -4.585  1.00 26.63           N  
ANISOU 1276  N   LEU B  69     3844   3428   2846    -13    176    125       N  
ATOM   1277  CA  LEU B  69      47.428 -25.277  -3.133  1.00 24.92           C  
ANISOU 1277  CA  LEU B  69     3611   3243   2617     71    172    114       C  
ATOM   1278  C   LEU B  69      48.909 -25.215  -2.792  1.00 26.06           C  
ANISOU 1278  C   LEU B  69     3784   3320   2798     46    167     81       C  
ATOM   1279  O   LEU B  69      49.625 -26.214  -2.936  1.00 23.91           O  
ANISOU 1279  O   LEU B  69     3488   3033   2565    -16    206     89       O  
ATOM   1280  CB  LEU B  69      46.744 -26.465  -2.458  1.00 20.60           C  
ANISOU 1280  CB  LEU B  69     2979   2785   2063     79    215    173       C  
ATOM   1281  CG  LEU B  69      46.861 -26.594  -0.933  1.00 21.84           C  
ANISOU 1281  CG  LEU B  69     3093   3034   2172    164    226    195       C  
ATOM   1282  CD1 LEU B  69      46.080 -25.502  -0.244  1.00 24.15           C  
ANISOU 1282  CD1 LEU B  69     3380   3425   2371    300    196    151       C  
ATOM   1283  CD2 LEU B  69      46.368 -27.962  -0.486  1.00 17.31           C  
ANISOU 1283  CD2 LEU B  69     2419   2533   1626    125    266    314       C  
ATOM   1284  N   HIS B  70      49.369 -24.045  -2.352  1.00 22.46           N  
ANISOU 1284  N   HIS B  70     3371   2811   2351     98    101     36       N  
ATOM   1285  CA  HIS B  70      50.774 -23.825  -2.027  1.00 22.24           C  
ANISOU 1285  CA  HIS B  70     3362   2710   2377     72     75      6       C  
ATOM   1286  C   HIS B  70      50.944 -23.824  -0.513  1.00 26.73           C  
ANISOU 1286  C   HIS B  70     3917   3329   2910    177     45    -46       C  
ATOM   1287  O   HIS B  70      50.409 -22.950   0.176  1.00 25.25           O  
ANISOU 1287  O   HIS B  70     3742   3167   2685    292    -23   -112       O  
ATOM   1288  CB  HIS B  70      51.282 -22.511  -2.623  1.00 28.04           C  
ANISOU 1288  CB  HIS B  70     4141   3332   3182     39     -7      6       C  
ATOM   1289  CG  HIS B  70      51.585 -22.584  -4.089  1.00 46.70           C  
ANISOU 1289  CG  HIS B  70     6499   5684   5560    -80     33     84       C  
ATOM   1290  ND1 HIS B  70      50.759 -22.036  -5.049  1.00 51.51           N  
ANISOU 1290  ND1 HIS B  70     7124   6297   6149   -100     13    138       N  
ATOM   1291  CD2 HIS B  70      52.623 -23.139  -4.760  1.00 51.47           C  
ANISOU 1291  CD2 HIS B  70     7073   6306   6177   -173     93    115       C  
ATOM   1292  CE1 HIS B  70      51.276 -22.248  -6.247  1.00 52.48           C  
ANISOU 1292  CE1 HIS B  70     7227   6458   6254   -201     60    206       C  
ATOM   1293  NE2 HIS B  70      52.408 -22.915  -6.100  1.00 51.52           N  
ANISOU 1293  NE2 HIS B  70     7074   6354   6149   -241    113    185       N  
ATOM   1294  N   ILE B  71      51.678 -24.804   0.001  1.00 20.26           N  
ANISOU 1294  N   ILE B  71     3065   2537   2096    152     87    -26       N  
ATOM   1295  CA  ILE B  71      52.018 -24.872   1.418  1.00 21.93           C  
ANISOU 1295  CA  ILE B  71     3257   2818   2256    246     56    -60       C  
ATOM   1296  C   ILE B  71      53.508 -24.577   1.530  1.00 24.06           C  
ANISOU 1296  C   ILE B  71     3548   2983   2609    207      4   -107       C  
ATOM   1297  O   ILE B  71      54.346 -25.338   1.027  1.00 24.95           O  
ANISOU 1297  O   ILE B  71     3641   3051   2789    113     50    -68       O  
ATOM   1298  CB  ILE B  71      51.661 -26.232   2.028  1.00 22.18           C  
ANISOU 1298  CB  ILE B  71     3218   2967   2241    247    125     35       C  
ATOM   1299  CG1 ILE B  71      50.237 -26.625   1.626  1.00 28.80           C  
ANISOU 1299  CG1 ILE B  71     4016   3884   3044    242    175    109       C  
ATOM   1300  CG2 ILE B  71      51.792 -26.184   3.550  1.00 27.02           C  
ANISOU 1300  CG2 ILE B  71     3799   3717   2751    366     94     22       C  
ATOM   1301  CD1 ILE B  71      49.942 -28.108   1.758  1.00 30.65           C  
ANISOU 1301  CD1 ILE B  71     4169   4162   3314    181    227    239       C  
ATOM   1302  N   ARG B  72      53.833 -23.456   2.161  1.00 21.17           N  
ANISOU 1302  N   ARG B  72     3214   2577   2252    286   -104   -203       N  
ATOM   1303  CA  ARG B  72      55.204 -23.026   2.380  1.00 22.95           C  
ANISOU 1303  CA  ARG B  72     3447   2696   2575    254   -182   -251       C  
ATOM   1304  C   ARG B  72      55.613 -23.294   3.822  1.00 25.60           C  
ANISOU 1304  C   ARG B  72     3763   3127   2838    361   -227   -313       C  
ATOM   1305  O   ARG B  72      54.769 -23.457   4.710  1.00 23.42           O  
ANISOU 1305  O   ARG B  72     3468   3010   2420    483   -219   -334       O  
ATOM   1306  CB  ARG B  72      55.359 -21.536   2.047  1.00 23.85           C  
ANISOU 1306  CB  ARG B  72     3603   2664   2797    257   -313   -315       C  
ATOM   1307  CG  ARG B  72      54.858 -21.227   0.633  1.00 38.48           C  
ANISOU 1307  CG  ARG B  72     5470   4454   4698    157   -273   -223       C  
ATOM   1308  CD  ARG B  72      55.386 -19.921   0.048  1.00 51.20           C  
ANISOU 1308  CD  ARG B  72     7096   5888   6468     94   -399   -208       C  
ATOM   1309  NE  ARG B  72      55.197 -19.904  -1.403  1.00 60.79           N  
ANISOU 1309  NE  ARG B  72     8302   7091   7703    -31   -331    -70       N  
ATOM   1310  CZ  ARG B  72      54.082 -19.505  -2.014  1.00 59.42           C  
ANISOU 1310  CZ  ARG B  72     8155   6922   7501    -13   -335    -37       C  
ATOM   1311  NH1 ARG B  72      53.047 -19.078  -1.304  1.00 53.92           N  
ANISOU 1311  NH1 ARG B  72     7488   6236   6764    128   -401   -138       N  
ATOM   1312  NH2 ARG B  72      53.999 -19.530  -3.338  1.00 60.18           N  
ANISOU 1312  NH2 ARG B  72     8236   7035   7594   -125   -276     93       N  
ATOM   1313  N   ASP B  73      56.926 -23.326   4.044  1.00 23.30           N  
ANISOU 1313  N   ASP B  73     3459   2760   2633    316   -276   -333       N  
ATOM   1314  CA  ASP B  73      57.503 -23.500   5.373  1.00 20.41           C  
ANISOU 1314  CA  ASP B  73     3074   2475   2206    413   -342   -396       C  
ATOM   1315  C   ASP B  73      56.896 -24.713   6.076  1.00 26.30           C  
ANISOU 1315  C   ASP B  73     3775   3415   2803    465   -248   -304       C  
ATOM   1316  O   ASP B  73      56.366 -24.626   7.186  1.00 26.73           O  
ANISOU 1316  O   ASP B  73     3811   3643   2701    605   -278   -342       O  
ATOM   1317  CB  ASP B  73      57.319 -22.230   6.201  1.00 27.67           C  
ANISOU 1317  CB  ASP B  73     4026   3394   3095    558   -501   -566       C  
ATOM   1318  CG  ASP B  73      58.350 -21.172   5.869  1.00 40.04           C  
ANISOU 1318  CG  ASP B  73     5612   4743   4860    497   -646   -642       C  
ATOM   1319  OD1 ASP B  73      59.547 -21.431   6.119  1.00 35.03           O  
ANISOU 1319  OD1 ASP B  73     4947   4061   4302    443   -681   -636       O  
ATOM   1320  OD2 ASP B  73      57.971 -20.099   5.342  1.00 43.75           O  
ANISOU 1320  OD2 ASP B  73     6115   5083   5426    494   -732   -688       O  
ATOM   1321  N   THR B  74      56.981 -25.855   5.396  1.00 17.23           N  
ANISOU 1321  N   THR B  74     2595   2242   1711    353   -142   -177       N  
ATOM   1322  CA  THR B  74      56.310 -27.061   5.855  1.00 20.25           C  
ANISOU 1322  CA  THR B  74     2922   2763   2011    368    -65    -47       C  
ATOM   1323  C   THR B  74      56.942 -27.585   7.138  1.00 26.15           C  
ANISOU 1323  C   THR B  74     3625   3620   2692    435   -108    -12       C  
ATOM   1324  O   THR B  74      58.149 -27.450   7.370  1.00 20.42           O  
ANISOU 1324  O   THR B  74     2905   2817   2037    423   -174    -71       O  
ATOM   1325  CB  THR B  74      56.356 -28.152   4.782  1.00 20.29           C  
ANISOU 1325  CB  THR B  74     2901   2671   2138    238     17     49       C  
ATOM   1326  OG1 THR B  74      57.711 -28.363   4.369  1.00 21.58           O  
ANISOU 1326  OG1 THR B  74     3060   2710   2430    169     -1     13       O  
ATOM   1327  CG2 THR B  74      55.506 -27.757   3.568  1.00 17.91           C  
ANISOU 1327  CG2 THR B  74     2631   2315   1857    186     64     34       C  
ATOM   1328  N   LEU B  75      56.097 -28.182   7.978  1.00 22.75           N  
ANISOU 1328  N   LEU B  75     3136   3389   2120    502    -72    104       N  
ATOM   1329  CA  LEU B  75      56.440 -28.858   9.214  1.00 23.21           C  
ANISOU 1329  CA  LEU B  75     3131   3608   2082    564    -97    202       C  
ATOM   1330  C   LEU B  75      55.989 -30.307   9.138  1.00 24.64           C  
ANISOU 1330  C   LEU B  75     3230   3812   2320    478    -28    438       C  
ATOM   1331  O   LEU B  75      55.040 -30.617   8.414  1.00 23.27           O  
ANISOU 1331  O   LEU B  75     3040   3608   2191    416     37    507       O  
ATOM   1332  CB  LEU B  75      55.773 -28.188  10.419  1.00 27.23           C  
ANISOU 1332  CB  LEU B  75     3614   4394   2338    742   -129    153       C  
ATOM   1333  CG  LEU B  75      56.168 -26.746  10.741  1.00 22.64           C  
ANISOU 1333  CG  LEU B  75     3101   3797   1704    865   -244   -106       C  
ATOM   1334  CD1 LEU B  75      55.328 -26.271  11.896  1.00 23.27           C  
ANISOU 1334  CD1 LEU B  75     3134   4194   1512   1066   -265   -164       C  
ATOM   1335  CD2 LEU B  75      57.642 -26.676  11.084  1.00 27.91           C  
ANISOU 1335  CD2 LEU B  75     3790   4355   2460    850   -348   -182       C  
ATOM   1336  N   PRO B  76      56.644 -31.216   9.867  1.00 26.92           N  
ANISOU 1336  N   PRO B  76     3460   4139   2631    469    -61    570       N  
ATOM   1337  CA  PRO B  76      56.207 -32.618   9.831  1.00 35.73           C  
ANISOU 1337  CA  PRO B  76     4485   5243   3847    380    -29    815       C  
ATOM   1338  C   PRO B  76      54.740 -32.806  10.181  1.00 33.84           C  
ANISOU 1338  C   PRO B  76     4168   5215   3476    402     36    983       C  
ATOM   1339  O   PRO B  76      54.103 -33.712   9.635  1.00 31.99           O  
ANISOU 1339  O   PRO B  76     3875   4895   3384    298     64   1139       O  
ATOM   1340  CB  PRO B  76      57.135 -33.295  10.849  1.00 39.10           C  
ANISOU 1340  CB  PRO B  76     4857   5726   4271    404    -99    932       C  
ATOM   1341  CG  PRO B  76      58.372 -32.447  10.831  1.00 38.43           C  
ANISOU 1341  CG  PRO B  76     4853   5550   4199    448   -162    702       C  
ATOM   1342  CD  PRO B  76      57.879 -31.043  10.656  1.00 32.55           C  
ANISOU 1342  CD  PRO B  76     4181   4866   3320    525   -150    503       C  
ATOM   1343  N   GLU B  77      54.175 -31.962  11.048  1.00 29.87           N  
ANISOU 1343  N   GLU B  77     3650   4988   2712    543     51    943       N  
ATOM   1344  CA  GLU B  77      52.754 -32.058  11.375  1.00 40.77           C  
ANISOU 1344  CA  GLU B  77     4933   6611   3946    579    124   1096       C  
ATOM   1345  C   GLU B  77      51.850 -31.786  10.175  1.00 37.22           C  
ANISOU 1345  C   GLU B  77     4519   6024   3601    513    177   1029       C  
ATOM   1346  O   GLU B  77      50.670 -32.146  10.219  1.00 40.14           O  
ANISOU 1346  O   GLU B  77     4790   6535   3926    496    237   1195       O  
ATOM   1347  CB  GLU B  77      52.411 -31.096  12.517  1.00 55.55           C  
ANISOU 1347  CB  GLU B  77     6777   8819   5509    778    123    997       C  
ATOM   1348  CG  GLU B  77      52.930 -29.676  12.312  1.00 66.56           C  
ANISOU 1348  CG  GLU B  77     8305  10134   6853    890     57    656       C  
ATOM   1349  CD  GLU B  77      52.793 -28.807  13.556  1.00 79.39           C  
ANISOU 1349  CD  GLU B  77     9889  12016   8258   1085     16    499       C  
ATOM   1350  OE1 GLU B  77      53.500 -29.072  14.554  1.00 83.59           O  
ANISOU 1350  OE1 GLU B  77    10380  12662   8719   1133    -30    528       O  
ATOM   1351  OE2 GLU B  77      51.982 -27.855  13.532  1.00 83.18           O  
ANISOU 1351  OE2 GLU B  77    10367  12557   8682   1186     23    332       O  
ATOM   1352  N   ASP B  78      52.371 -31.173   9.104  1.00 30.84           N  
ANISOU 1352  N   ASP B  78     3833   4958   2925    471    154    809       N  
ATOM   1353  CA  ASP B  78      51.585 -30.981   7.888  1.00 26.47           C  
ANISOU 1353  CA  ASP B  78     3312   4273   2471    400    195    758       C  
ATOM   1354  C   ASP B  78      51.315 -32.279   7.148  1.00 30.78           C  
ANISOU 1354  C   ASP B  78     3803   4665   3227    249    207    920       C  
ATOM   1355  O   ASP B  78      50.487 -32.280   6.231  1.00 26.82           O  
ANISOU 1355  O   ASP B  78     3303   4093   2793    194    235    908       O  
ATOM   1356  CB  ASP B  78      52.283 -30.018   6.933  1.00 27.58           C  
ANISOU 1356  CB  ASP B  78     3583   4204   2692    387    162    519       C  
ATOM   1357  CG  ASP B  78      52.388 -28.627   7.498  1.00 37.74           C  
ANISOU 1357  CG  ASP B  78     4926   5588   3828    531    116    337       C  
ATOM   1358  OD1 ASP B  78      51.482 -28.223   8.254  1.00 37.87           O  
ANISOU 1358  OD1 ASP B  78     4891   5836   3662    655    131    345       O  
ATOM   1359  OD2 ASP B  78      53.381 -27.930   7.198  1.00 32.16           O  
ANISOU 1359  OD2 ASP B  78     4300   4727   3192    526     53    183       O  
ATOM   1360  N   THR B  79      52.011 -33.356   7.502  1.00 28.71           N  
ANISOU 1360  N   THR B  79     3490   4333   3085    188    167   1055       N  
ATOM   1361  CA  THR B  79      51.752 -34.659   6.914  1.00 25.60           C  
ANISOU 1361  CA  THR B  79     3028   3774   2925     58    141   1204       C  
ATOM   1362  C   THR B  79      50.288 -35.047   7.108  1.00 26.69           C  
ANISOU 1362  C   THR B  79     3048   4057   3035     27    177   1414       C  
ATOM   1363  O   THR B  79      49.710 -34.853   8.183  1.00 27.12           O  
ANISOU 1363  O   THR B  79     3015   4394   2894    100    217   1566       O  
ATOM   1364  CB  THR B  79      52.680 -35.700   7.547  1.00 24.98           C  
ANISOU 1364  CB  THR B  79     2895   3626   2971     23     71   1344       C  
ATOM   1365  OG1 THR B  79      54.043 -35.322   7.311  1.00 29.89           O  
ANISOU 1365  OG1 THR B  79     3612   4118   3628     51     40   1141       O  
ATOM   1366  CG2 THR B  79      52.435 -37.102   6.983  1.00 24.99           C  
ANISOU 1366  CG2 THR B  79     2816   3416   3263   -104      4   1490       C  
ATOM   1367  N   GLY B  80      49.682 -35.566   6.052  1.00 22.97           N  
ANISOU 1367  N   GLY B  80     2563   3416   2749    -72    161   1415       N  
ATOM   1368  CA  GLY B  80      48.305 -36.001   6.132  1.00 30.76           C  
ANISOU 1368  CA  GLY B  80     3422   4510   3755   -122    179   1621       C  
ATOM   1369  C   GLY B  80      47.693 -36.134   4.752  1.00 32.68           C  
ANISOU 1369  C   GLY B  80     3695   4562   4159   -200    156   1508       C  
ATOM   1370  O   GLY B  80      48.369 -36.010   3.732  1.00 25.47           O  
ANISOU 1370  O   GLY B  80     2893   3446   3338   -216    128   1285       O  
ATOM   1371  N   TYR B  81      46.389 -36.402   4.756  1.00 34.73           N  
ANISOU 1371  N   TYR B  81     3838   4918   4439   -245    169   1675       N  
ATOM   1372  CA  TYR B  81      45.605 -36.530   3.539  1.00 27.91           C  
ANISOU 1372  CA  TYR B  81     2980   3912   3712   -314    138   1590       C  
ATOM   1373  C   TYR B  81      44.856 -35.226   3.313  1.00 29.83           C  
ANISOU 1373  C   TYR B  81     3273   4328   3731   -220    224   1463       C  
ATOM   1374  O   TYR B  81      44.089 -34.791   4.180  1.00 32.72           O  
ANISOU 1374  O   TYR B  81     3549   4962   3919   -151    292   1592       O  
ATOM   1375  CB  TYR B  81      44.627 -37.702   3.637  1.00 30.14           C  
ANISOU 1375  CB  TYR B  81     3085   4160   4209   -437     68   1864       C  
ATOM   1376  CG  TYR B  81      45.299 -39.052   3.614  1.00 35.68           C  
ANISOU 1376  CG  TYR B  81     3737   4608   5211   -539    -64   1964       C  
ATOM   1377  CD1 TYR B  81      45.632 -39.666   2.410  1.00 34.99           C  
ANISOU 1377  CD1 TYR B  81     3707   4214   5374   -596   -180   1771       C  
ATOM   1378  CD2 TYR B  81      45.606 -39.715   4.796  1.00 38.77           C  
ANISOU 1378  CD2 TYR B  81     4029   5086   5617   -532    -99   2151       C  
ATOM   1379  CE1 TYR B  81      46.248 -40.910   2.388  1.00 40.36           C  
ANISOU 1379  CE1 TYR B  81     4337   4643   6356   -669   -326   1832       C  
ATOM   1380  CE2 TYR B  81      46.223 -40.955   4.783  1.00 42.10           C  
ANISOU 1380  CE2 TYR B  81     4404   5269   6322   -602   -243   2204       C  
ATOM   1381  CZ  TYR B  81      46.539 -41.546   3.577  1.00 41.64           C  
ANISOU 1381  CZ  TYR B  81     4402   4884   6537   -663   -360   2038       C  
ATOM   1382  OH  TYR B  81      47.150 -42.777   3.564  1.00 51.75           O  
ANISOU 1382  OH  TYR B  81     5631   5932   8101   -701   -521   2051       O  
ATOM   1383  N   TYR B  82      45.086 -34.608   2.159  1.00 27.59           N  
ANISOU 1383  N   TYR B  82     3123   3909   3453   -209    217   1216       N  
ATOM   1384  CA  TYR B  82      44.398 -33.390   1.759  1.00 29.33           C  
ANISOU 1384  CA  TYR B  82     3397   4236   3510   -131    269   1091       C  
ATOM   1385  C   TYR B  82      43.337 -33.745   0.729  1.00 33.30           C  
ANISOU 1385  C   TYR B  82     3854   4664   4136   -208    230   1098       C  
ATOM   1386  O   TYR B  82      43.611 -34.481  -0.224  1.00 35.20           O  
ANISOU 1386  O   TYR B  82     4118   4698   4558   -294    155   1027       O  
ATOM   1387  CB  TYR B  82      45.383 -32.366   1.191  1.00 23.19           C  
ANISOU 1387  CB  TYR B  82     2787   3372   2652    -72    277    848       C  
ATOM   1388  CG  TYR B  82      46.330 -31.821   2.236  1.00 25.63           C  
ANISOU 1388  CG  TYR B  82     3139   3766   2833     17    300    818       C  
ATOM   1389  CD1 TYR B  82      47.367 -32.602   2.738  1.00 27.68           C  
ANISOU 1389  CD1 TYR B  82     3389   3956   3172    -17    274    872       C  
ATOM   1390  CD2 TYR B  82      46.180 -30.532   2.731  1.00 26.27           C  
ANISOU 1390  CD2 TYR B  82     3265   3988   2729    145    327    724       C  
ATOM   1391  CE1 TYR B  82      48.230 -32.112   3.705  1.00 29.29           C  
ANISOU 1391  CE1 TYR B  82     3626   4245   3257     67    281    840       C  
ATOM   1392  CE2 TYR B  82      47.038 -30.031   3.695  1.00 27.50           C  
ANISOU 1392  CE2 TYR B  82     3455   4217   2776    236    322    671       C  
ATOM   1393  CZ  TYR B  82      48.066 -30.825   4.175  1.00 26.30           C  
ANISOU 1393  CZ  TYR B  82     3293   4009   2689    192    303    733       C  
ATOM   1394  OH  TYR B  82      48.925 -30.336   5.136  1.00 25.32           O  
ANISOU 1394  OH  TYR B  82     3201   3965   2457    284    285    676       O  
ATOM   1395  N   ARG B  83      42.128 -33.247   0.933  1.00 23.47           N  
ANISOU 1395  N   ARG B  83     2531   3596   2792   -165    271   1170       N  
ATOM   1396  CA  ARG B  83      41.023 -33.510   0.028  1.00 22.45           C  
ANISOU 1396  CA  ARG B  83     2342   3418   2770   -231    228   1186       C  
ATOM   1397  C   ARG B  83      40.451 -32.189  -0.478  1.00 27.14           C  
ANISOU 1397  C   ARG B  83     3008   4098   3206   -134    263   1039       C  
ATOM   1398  O   ARG B  83      40.415 -31.195   0.251  1.00 28.02           O  
ANISOU 1398  O   ARG B  83     3137   4377   3130     -8    325   1006       O  
ATOM   1399  CB  ARG B  83      39.939 -34.343   0.730  1.00 22.23           C  
ANISOU 1399  CB  ARG B  83     2102   3520   2826   -295    225   1469       C  
ATOM   1400  CG  ARG B  83      38.731 -34.676  -0.145  1.00 30.16           C  
ANISOU 1400  CG  ARG B  83     3018   4472   3968   -373    162   1502       C  
ATOM   1401  CD  ARG B  83      37.749 -35.606   0.570  1.00 26.40           C  
ANISOU 1401  CD  ARG B  83     2305   4109   3618   -464    146   1824       C  
ATOM   1402  NE  ARG B  83      38.329 -36.917   0.839  1.00 32.75           N  
ANISOU 1402  NE  ARG B  83     3046   4735   4661   -588     55   1978       N  
ATOM   1403  CZ  ARG B  83      38.453 -37.876  -0.073  1.00 36.41           C  
ANISOU 1403  CZ  ARG B  83     3517   4904   5414   -705    -95   1920       C  
ATOM   1404  NH1 ARG B  83      38.051 -37.664  -1.321  1.00 25.74           N  
ANISOU 1404  NH1 ARG B  83     2235   3432   4115   -712   -159   1710       N  
ATOM   1405  NH2 ARG B  83      38.980 -39.048   0.262  1.00 34.42           N  
ANISOU 1405  NH2 ARG B  83     3200   4479   5399   -801   -197   2058       N  
ATOM   1406  N   VAL B  84      40.028 -32.173  -1.738  1.00 23.74           N  
ANISOU 1406  N   VAL B  84     2617   3547   2855   -184    207    938       N  
ATOM   1407  CA  VAL B  84      39.269 -31.061  -2.292  1.00 19.03           C  
ANISOU 1407  CA  VAL B  84     2060   3024   2147   -109    218    843       C  
ATOM   1408  C   VAL B  84      37.967 -31.614  -2.860  1.00 23.82           C  
ANISOU 1408  C   VAL B  84     2543   3640   2867   -179    166    929       C  
ATOM   1409  O   VAL B  84      37.948 -32.699  -3.451  1.00 28.70           O  
ANISOU 1409  O   VAL B  84     3122   4111   3670   -295     85    952       O  
ATOM   1410  CB  VAL B  84      40.081 -30.281  -3.353  1.00 22.91           C  
ANISOU 1410  CB  VAL B  84     2727   3384   2592    -93    193    640       C  
ATOM   1411  CG1 VAL B  84      40.360 -31.129  -4.594  1.00 22.57           C  
ANISOU 1411  CG1 VAL B  84     2715   3176   2684   -198    120    565       C  
ATOM   1412  CG2 VAL B  84      39.393 -28.964  -3.712  1.00 22.88           C  
ANISOU 1412  CG2 VAL B  84     2766   3455   2473      0    195    570       C  
ATOM   1413  N   THR B  85      36.871 -30.886  -2.639  1.00 27.75           N  
ANISOU 1413  N   THR B  85     2967   4308   3268   -100    198    968       N  
ATOM   1414  CA  THR B  85      35.551 -31.260  -3.140  1.00 26.94           C  
ANISOU 1414  CA  THR B  85     2732   4240   3264   -156    149   1053       C  
ATOM   1415  C   THR B  85      34.970 -30.091  -3.924  1.00 27.34           C  
ANISOU 1415  C   THR B  85     2854   4318   3215    -69    132    916       C  
ATOM   1416  O   THR B  85      34.900 -28.968  -3.414  1.00 25.22           O  
ANISOU 1416  O   THR B  85     2619   4174   2791     71    185    862       O  
ATOM   1417  CB  THR B  85      34.601 -31.650  -2.000  1.00 26.33           C  
ANISOU 1417  CB  THR B  85     2433   4389   3183   -149    206   1292       C  
ATOM   1418  OG1 THR B  85      35.231 -32.628  -1.161  1.00 33.57           O  
ANISOU 1418  OG1 THR B  85     3286   5293   4174   -222    220   1450       O  
ATOM   1419  CG2 THR B  85      33.296 -32.233  -2.557  1.00 27.58           C  
ANISOU 1419  CG2 THR B  85     2430   4552   3497   -241    136   1406       C  
ATOM   1420  N   ALA B  86      34.561 -30.356  -5.160  1.00 23.38           N  
ANISOU 1420  N   ALA B  86     2373   3700   2810   -142     40    853       N  
ATOM   1421  CA  ALA B  86      33.989 -29.351  -6.043  1.00 21.63           C  
ANISOU 1421  CA  ALA B  86     2214   3493   2512    -77      2    747       C  
ATOM   1422  C   ALA B  86      32.490 -29.587  -6.168  1.00 27.25           C  
ANISOU 1422  C   ALA B  86     2751   4305   3297    -94    -38    849       C  
ATOM   1423  O   ALA B  86      32.058 -30.720  -6.405  1.00 29.72           O  
ANISOU 1423  O   ALA B  86     2953   4560   3780   -215   -103    934       O  
ATOM   1424  CB  ALA B  86      34.655 -29.404  -7.419  1.00 25.07           C  
ANISOU 1424  CB  ALA B  86     2795   3765   2965   -135    -75    598       C  
ATOM   1425  N   THR B  87      31.698 -28.523  -6.023  1.00 24.52           N  
ANISOU 1425  N   THR B  87     2374   4096   2846     29    -16    836       N  
ATOM   1426  CA  THR B  87      30.247 -28.660  -6.003  1.00 28.32           C  
ANISOU 1426  CA  THR B  87     2665   4712   3385     33    -39    943       C  
ATOM   1427  C   THR B  87      29.587 -27.548  -6.804  1.00 26.02           C  
ANISOU 1427  C   THR B  87     2424   4433   3027    129    -97    837       C  
ATOM   1428  O   THR B  87      30.016 -26.392  -6.742  1.00 26.85           O  
ANISOU 1428  O   THR B  87     2655   4535   3013    252    -80    730       O  
ATOM   1429  CB  THR B  87      29.702 -28.635  -4.565  1.00 34.66           C  
ANISOU 1429  CB  THR B  87     3283   5765   4122    115     71   1094       C  
ATOM   1430  OG1 THR B  87      30.366 -29.634  -3.783  1.00 44.34           O  
ANISOU 1430  OG1 THR B  87     4461   6984   5401     24    119   1222       O  
ATOM   1431  CG2 THR B  87      28.192 -28.903  -4.545  1.00 31.91           C  
ANISOU 1431  CG2 THR B  87     2698   5578   3848    100     53   1236       C  
ATOM   1432  N   ASN B  88      28.548 -27.909  -7.550  1.00 29.55           N  
ANISOU 1432  N   ASN B  88     2768   4884   3576     69   -184    875       N  
ATOM   1433  CA  ASN B  88      27.624 -26.944  -8.138  1.00 30.69           C  
ANISOU 1433  CA  ASN B  88     2898   5086   3676    166   -242    823       C  
ATOM   1434  C   ASN B  88      26.214 -27.509  -7.959  1.00 36.61           C  
ANISOU 1434  C   ASN B  88     3398   5975   4536    131   -265    962       C  
ATOM   1435  O   ASN B  88      25.995 -28.476  -7.222  1.00 35.24           O  
ANISOU 1435  O   ASN B  88     3060   5875   4454     47   -219   1119       O  
ATOM   1436  CB  ASN B  88      27.988 -26.639  -9.600  1.00 32.90           C  
ANISOU 1436  CB  ASN B  88     3353   5205   3944    126   -356    696       C  
ATOM   1437  CG  ASN B  88      27.921 -27.864 -10.510  1.00 32.39           C  
ANISOU 1437  CG  ASN B  88     3263   5034   4008    -33   -456    689       C  
ATOM   1438  OD1 ASN B  88      27.279 -28.872 -10.192  1.00 34.75           O  
ANISOU 1438  OD1 ASN B  88     3390   5357   4457   -122   -479    793       O  
ATOM   1439  ND2 ASN B  88      28.562 -27.762 -11.667  1.00 26.24           N  
ANISOU 1439  ND2 ASN B  88     2643   4148   3177    -65   -531    567       N  
ATOM   1440  N   THR B  89      25.235 -26.917  -8.649  1.00 40.03           N  
ANISOU 1440  N   THR B  89     3787   6448   4975    188   -346    929       N  
ATOM   1441  CA  THR B  89      23.851 -27.366  -8.510  1.00 42.73           C  
ANISOU 1441  CA  THR B  89     3874   6935   5428    160   -373   1064       C  
ATOM   1442  C   THR B  89      23.597 -28.726  -9.150  1.00 45.58           C  
ANISOU 1442  C   THR B  89     4151   7174   5994    -43   -484   1135       C  
ATOM   1443  O   THR B  89      22.548 -29.325  -8.892  1.00 44.78           O  
ANISOU 1443  O   THR B  89     3808   7177   6030   -107   -509   1290       O  
ATOM   1444  CB  THR B  89      22.870 -26.346  -9.114  1.00 41.88           C  
ANISOU 1444  CB  THR B  89     3737   6893   5282    284   -447    999       C  
ATOM   1445  OG1 THR B  89      23.365 -25.882 -10.374  1.00 42.68           O  
ANISOU 1445  OG1 THR B  89     4057   6812   5349    270   -560    858       O  
ATOM   1446  CG2 THR B  89      22.678 -25.168  -8.181  1.00 42.80           C  
ANISOU 1446  CG2 THR B  89     3822   7183   5257    504   -352    960       C  
ATOM   1447  N   ALA B  90      24.516 -29.226  -9.974  1.00 46.65           N  
ANISOU 1447  N   ALA B  90     4463   7097   6165   -140   -563   1021       N  
ATOM   1448  CA  ALA B  90      24.315 -30.503 -10.642  1.00 38.37           C  
ANISOU 1448  CA  ALA B  90     3345   5907   5328   -310   -705   1035       C  
ATOM   1449  C   ALA B  90      24.938 -31.686  -9.911  1.00 41.35           C  
ANISOU 1449  C   ALA B  90     3663   6200   5849   -433   -677   1143       C  
ATOM   1450  O   ALA B  90      24.630 -32.830 -10.255  1.00 52.27           O  
ANISOU 1450  O   ALA B  90     4937   7456   7466   -578   -813   1187       O  
ATOM   1451  CB  ALA B  90      24.871 -30.445 -12.071  1.00 38.42           C  
ANISOU 1451  CB  ALA B  90     3552   5757   5287   -326   -834    821       C  
ATOM   1452  N   GLY B  91      25.795 -31.455  -8.927  1.00 32.66           N  
ANISOU 1452  N   GLY B  91     2626   5150   4635   -381   -528   1185       N  
ATOM   1453  CA  GLY B  91      26.383 -32.556  -8.196  1.00 30.82           C  
ANISOU 1453  CA  GLY B  91     2329   4841   4539   -494   -508   1311       C  
ATOM   1454  C   GLY B  91      27.724 -32.170  -7.607  1.00 31.61           C  
ANISOU 1454  C   GLY B  91     2608   4927   4477   -423   -385   1244       C  
ATOM   1455  O   GLY B  91      28.124 -31.008  -7.626  1.00 33.29           O  
ANISOU 1455  O   GLY B  91     2968   5203   4478   -286   -308   1122       O  
ATOM   1456  N   SER B  92      28.408 -33.183  -7.084  1.00 38.25           N  
ANISOU 1456  N   SER B  92     3422   5666   5445   -524   -387   1333       N  
ATOM   1457  CA  SER B  92      29.685 -32.999  -6.418  1.00 39.82           C  
ANISOU 1457  CA  SER B  92     3759   5851   5521   -474   -280   1297       C  
ATOM   1458  C   SER B  92      30.666 -34.069  -6.876  1.00 40.25           C  
ANISOU 1458  C   SER B  92     3898   5653   5743   -585   -380   1219       C  
ATOM   1459  O   SER B  92      30.280 -35.154  -7.321  1.00 37.09           O  
ANISOU 1459  O   SER B  92     3395   5105   5593   -712   -528   1257       O  
ATOM   1460  CB  SER B  92      29.536 -33.050  -4.893  1.00 42.24           C  
ANISOU 1460  CB  SER B  92     3910   6371   5769   -444   -145   1531       C  
ATOM   1461  OG  SER B  92      29.294 -34.375  -4.462  1.00 61.89           O  
ANISOU 1461  OG  SER B  92     6213   8804   8497   -601   -205   1760       O  
ATOM   1462  N   THR B  93      31.949 -33.738  -6.770  1.00 34.19           N  
ANISOU 1462  N   THR B  93     3311   4832   4848   -529   -314   1095       N  
ATOM   1463  CA  THR B  93      33.021 -34.684  -7.031  1.00 34.34           C  
ANISOU 1463  CA  THR B  93     3406   4642   5002   -603   -386   1014       C  
ATOM   1464  C   THR B  93      34.182 -34.337  -6.108  1.00 35.88           C  
ANISOU 1464  C   THR B  93     3695   4879   5059   -541   -256   1029       C  
ATOM   1465  O   THR B  93      34.350 -33.181  -5.713  1.00 31.03           O  
ANISOU 1465  O   THR B  93     3158   4410   4222   -425   -140    998       O  
ATOM   1466  CB  THR B  93      33.448 -34.661  -8.508  1.00 33.71           C  
ANISOU 1466  CB  THR B  93     3474   4424   4909   -595   -492    745       C  
ATOM   1467  OG1 THR B  93      34.477 -35.633  -8.729  1.00 43.81           O  
ANISOU 1467  OG1 THR B  93     4805   5517   6325   -646   -566    645       O  
ATOM   1468  CG2 THR B  93      33.971 -33.288  -8.900  1.00 35.01           C  
ANISOU 1468  CG2 THR B  93     3817   4687   4799   -475   -393    608       C  
ATOM   1469  N   SER B  94      34.983 -35.346  -5.766  1.00 29.79           N  
ANISOU 1469  N   SER B  94     2914   3966   4441   -614   -298   1069       N  
ATOM   1470  CA  SER B  94      35.996 -35.182  -4.737  1.00 31.59           C  
ANISOU 1470  CA  SER B  94     3194   4243   4568   -568   -189   1125       C  
ATOM   1471  C   SER B  94      37.215 -36.027  -5.079  1.00 24.57           C  
ANISOU 1471  C   SER B  94     2389   3133   3813   -615   -265   1008       C  
ATOM   1472  O   SER B  94      37.093 -37.087  -5.697  1.00 27.74           O  
ANISOU 1472  O   SER B  94     2736   3347   4455   -703   -415    971       O  
ATOM   1473  CB  SER B  94      35.432 -35.576  -3.368  1.00 24.94           C  
ANISOU 1473  CB  SER B  94     2159   3556   3761   -600   -131   1429       C  
ATOM   1474  OG  SER B  94      36.374 -35.351  -2.339  1.00 32.36           O  
ANISOU 1474  OG  SER B  94     3148   4577   4571   -539    -30   1478       O  
ATOM   1475  N   CYS B  95      38.392 -35.549  -4.678  1.00 23.22           N  
ANISOU 1475  N   CYS B  95     2343   2981   3500   -546   -176    935       N  
ATOM   1476  CA  CYS B  95      39.602 -36.359  -4.778  1.00 31.93           C  
ANISOU 1476  CA  CYS B  95     3501   3904   4727   -577   -233    850       C  
ATOM   1477  C   CYS B  95      40.555 -35.964  -3.658  1.00 28.29           C  
ANISOU 1477  C   CYS B  95     3087   3528   4135   -520   -120    919       C  
ATOM   1478  O   CYS B  95      40.468 -34.868  -3.103  1.00 31.30           O  
ANISOU 1478  O   CYS B  95     3507   4088   4298   -434     -7    941       O  
ATOM   1479  CB  CYS B  95      40.278 -36.216  -6.150  1.00 30.62           C  
ANISOU 1479  CB  CYS B  95     3473   3635   4526   -545   -283    561       C  
ATOM   1480  SG  CYS B  95      41.097 -34.629  -6.459  1.00 33.14           S  
ANISOU 1480  SG  CYS B  95     3972   4088   4531   -434   -145    414       S  
ATOM   1481  N   GLN B  96      41.473 -36.868  -3.326  1.00 32.06           N  
ANISOU 1481  N   GLN B  96     3556   3866   4760   -559   -172    939       N  
ATOM   1482  CA  GLN B  96      42.405 -36.620  -2.236  1.00 31.73           C  
ANISOU 1482  CA  GLN B  96     3546   3896   4612   -510    -86   1012       C  
ATOM   1483  C   GLN B  96      43.797 -37.120  -2.607  1.00 30.75           C  
ANISOU 1483  C   GLN B  96     3509   3596   4579   -507   -136    851       C  
ATOM   1484  O   GLN B  96      43.970 -37.951  -3.502  1.00 29.69           O  
ANISOU 1484  O   GLN B  96     3370   3276   4633   -548   -253    723       O  
ATOM   1485  CB  GLN B  96      41.944 -37.288  -0.931  1.00 30.66           C  
ANISOU 1485  CB  GLN B  96     3246   3847   4556   -561    -85   1326       C  
ATOM   1486  CG  GLN B  96      42.304 -38.761  -0.840  1.00 40.93           C  
ANISOU 1486  CG  GLN B  96     4458   4924   6169   -666   -225   1433       C  
ATOM   1487  CD  GLN B  96      42.141 -39.339   0.557  1.00 41.31           C  
ANISOU 1487  CD  GLN B  96     4352   5078   6266   -714   -214   1779       C  
ATOM   1488  OE1 GLN B  96      41.732 -38.651   1.496  1.00 41.84           O  
ANISOU 1488  OE1 GLN B  96     4370   5427   6102   -655    -88   1929       O  
ATOM   1489  NE2 GLN B  96      42.456 -40.618   0.696  1.00 41.46           N  
ANISOU 1489  NE2 GLN B  96     4288   4886   6579   -804   -357   1894       N  
ATOM   1490  N   ALA B  97      44.794 -36.588  -1.904  1.00 25.08           N  
ANISOU 1490  N   ALA B  97     2861   2947   3723   -444    -53    841       N  
ATOM   1491  CA  ALA B  97      46.169 -37.047  -2.035  1.00 30.22           C  
ANISOU 1491  CA  ALA B  97     3569   3459   4453   -434    -88    721       C  
ATOM   1492  C   ALA B  97      46.837 -36.991  -0.671  1.00 26.59           C  
ANISOU 1492  C   ALA B  97     3092   3080   3933   -405    -38    870       C  
ATOM   1493  O   ALA B  97      46.336 -36.365   0.265  1.00 30.35           O  
ANISOU 1493  O   ALA B  97     3536   3748   4245   -367     39   1012       O  
ATOM   1494  CB  ALA B  97      46.961 -36.211  -3.047  1.00 23.79           C  
ANISOU 1494  CB  ALA B  97     2889   2648   3501   -376    -41    466       C  
ATOM   1495  N   HIS B  98      47.987 -37.644  -0.571  1.00 25.54           N  
ANISOU 1495  N   HIS B  98     2971   2812   3919   -407    -90    820       N  
ATOM   1496  CA  HIS B  98      48.756 -37.677   0.663  1.00 20.61           C  
ANISOU 1496  CA  HIS B  98     2333   2251   3249   -378    -64    948       C  
ATOM   1497  C   HIS B  98      49.964 -36.755   0.548  1.00 21.58           C  
ANISOU 1497  C   HIS B  98     2576   2406   3216   -302      3    758       C  
ATOM   1498  O   HIS B  98      50.586 -36.653  -0.511  1.00 26.75           O  
ANISOU 1498  O   HIS B  98     3297   2967   3899   -293     -5    548       O  
ATOM   1499  CB  HIS B  98      49.218 -39.102   0.981  1.00 28.93           C  
ANISOU 1499  CB  HIS B  98     3296   3118   4580   -438   -190   1060       C  
ATOM   1500  CG  HIS B  98      49.976 -39.216   2.266  1.00 26.75           C  
ANISOU 1500  CG  HIS B  98     2991   2913   4258   -411   -177   1220       C  
ATOM   1501  ND1 HIS B  98      51.352 -39.282   2.318  1.00 30.47           N  
ANISOU 1501  ND1 HIS B  98     3521   3300   4755   -366   -195   1092       N  
ATOM   1502  CD2 HIS B  98      49.549 -39.264   3.550  1.00 27.93           C  
ANISOU 1502  CD2 HIS B  98     3050   3241   4320   -415   -148   1500       C  
ATOM   1503  CE1 HIS B  98      51.739 -39.377   3.578  1.00 30.36           C  
ANISOU 1503  CE1 HIS B  98     3463   3388   4683   -347   -190   1282       C  
ATOM   1504  NE2 HIS B  98      50.665 -39.368   4.345  1.00 31.49           N  
ANISOU 1504  NE2 HIS B  98     3516   3703   4744   -373   -159   1532       N  
ATOM   1505  N   LEU B  99      50.278 -36.074   1.640  1.00 23.62           N  
ANISOU 1505  N   LEU B  99     2851   2818   3306   -243     63    836       N  
ATOM   1506  CA  LEU B  99      51.494 -35.285   1.764  1.00 21.89           C  
ANISOU 1506  CA  LEU B  99     2722   2615   2979   -181     98    693       C  
ATOM   1507  C   LEU B  99      52.324 -35.871   2.890  1.00 24.75           C  
ANISOU 1507  C   LEU B  99     3039   2981   3386   -166     60    811       C  
ATOM   1508  O   LEU B  99      51.820 -36.047   4.004  1.00 25.36           O  
ANISOU 1508  O   LEU B  99     3042   3197   3395   -152     64   1013       O  
ATOM   1509  CB  LEU B  99      51.187 -33.821   2.062  1.00 20.23           C  
ANISOU 1509  CB  LEU B  99     2579   2569   2537   -106    170    639       C  
ATOM   1510  CG  LEU B  99      52.370 -32.958   2.497  1.00 24.73           C  
ANISOU 1510  CG  LEU B  99     3221   3162   3011    -44    179    532       C  
ATOM   1511  CD1 LEU B  99      53.362 -32.766   1.354  1.00 19.38           C  
ANISOU 1511  CD1 LEU B  99     2605   2349   2408    -77    177    360       C  
ATOM   1512  CD2 LEU B  99      51.881 -31.609   3.025  1.00 22.03           C  
ANISOU 1512  CD2 LEU B  99     2922   2974   2473     46    209    494       C  
ATOM   1513  N   GLN B 100      53.586 -36.173   2.597  1.00 23.62           N  
ANISOU 1513  N   GLN B 100     2924   2708   3344   -164     25    693       N  
ATOM   1514  CA  GLN B 100      54.554 -36.605   3.599  1.00 19.28           C  
ANISOU 1514  CA  GLN B 100     2341   2154   2831   -140    -19    776       C  
ATOM   1515  C   GLN B 100      55.604 -35.509   3.711  1.00 19.00           C  
ANISOU 1515  C   GLN B 100     2388   2172   2658    -78     21    620       C  
ATOM   1516  O   GLN B 100      56.339 -35.256   2.754  1.00 25.52           O  
ANISOU 1516  O   GLN B 100     3257   2907   3530    -86     33    442       O  
ATOM   1517  CB  GLN B 100      55.194 -37.941   3.217  1.00 21.60           C  
ANISOU 1517  CB  GLN B 100     2578   2234   3396   -182   -119    769       C  
ATOM   1518  CG  GLN B 100      56.195 -38.458   4.246  1.00 29.08           C  
ANISOU 1518  CG  GLN B 100     3482   3162   4405   -157   -180    872       C  
ATOM   1519  CD  GLN B 100      55.516 -38.909   5.532  1.00 38.90           C  
ANISOU 1519  CD  GLN B 100     4637   4526   5616   -174   -209   1180       C  
ATOM   1520  OE1 GLN B 100      54.381 -39.379   5.513  1.00 44.94           O  
ANISOU 1520  OE1 GLN B 100     5334   5301   6440   -233   -222   1341       O  
ATOM   1521  NE2 GLN B 100      56.213 -38.774   6.651  1.00 41.23           N  
ANISOU 1521  NE2 GLN B 100     4919   4932   5813   -124   -221   1274       N  
ATOM   1522  N   VAL B 101      55.647 -34.825   4.853  1.00 27.59           N  
ANISOU 1522  N   VAL B 101     3485   3424   3574    -14     34    685       N  
ATOM   1523  CA  VAL B 101      56.686 -33.836   5.120  1.00 27.47           C  
ANISOU 1523  CA  VAL B 101     3534   3439   3465     43     34    548       C  
ATOM   1524  C   VAL B 101      57.780 -34.564   5.893  1.00 34.02           C  
ANISOU 1524  C   VAL B 101     4315   4232   4377     55    -32    609       C  
ATOM   1525  O   VAL B 101      57.621 -34.870   7.076  1.00 36.03           O  
ANISOU 1525  O   VAL B 101     4520   4613   4557     94    -63    769       O  
ATOM   1526  CB  VAL B 101      56.159 -32.626   5.894  1.00 23.02           C  
ANISOU 1526  CB  VAL B 101     3008   3062   2678    130     55    529       C  
ATOM   1527  CG1 VAL B 101      57.291 -31.628   6.125  1.00 17.06           C  
ANISOU 1527  CG1 VAL B 101     2312   2291   1879    178     17    375       C  
ATOM   1528  CG2 VAL B 101      55.003 -31.969   5.152  1.00 24.87           C  
ANISOU 1528  CG2 VAL B 101     3277   3324   2848    124    108    483       C  
ATOM   1529  N   GLU B 102      58.893 -34.843   5.223  1.00 27.58           N  
ANISOU 1529  N   GLU B 102     3504   3268   3708     30    -55    490       N  
ATOM   1530  CA  GLU B 102      59.954 -35.624   5.839  1.00 34.30           C  
ANISOU 1530  CA  GLU B 102     4300   4059   4673     43   -129    539       C  
ATOM   1531  C   GLU B 102      60.789 -34.756   6.770  1.00 30.50           C  
ANISOU 1531  C   GLU B 102     3845   3682   4061    108   -155    498       C  
ATOM   1532  O   GLU B 102      61.072 -33.591   6.474  1.00 22.81           O  
ANISOU 1532  O   GLU B 102     2931   2733   3002    123   -130    355       O  
ATOM   1533  CB  GLU B 102      60.829 -36.266   4.763  1.00 36.67           C  
ANISOU 1533  CB  GLU B 102     4575   4182   5177     12   -146    404       C  
ATOM   1534  CG  GLU B 102      60.050 -37.221   3.871  1.00 42.54           C  
ANISOU 1534  CG  GLU B 102     5286   4809   6069    -34   -156    410       C  
ATOM   1535  CD  GLU B 102      60.861 -37.719   2.699  1.00 47.95           C  
ANISOU 1535  CD  GLU B 102     5945   5364   6911    -30   -169    218       C  
ATOM   1536  OE1 GLU B 102      62.025 -37.286   2.563  1.00 48.47           O  
ANISOU 1536  OE1 GLU B 102     6008   5448   6963     -2   -150    104       O  
ATOM   1537  OE2 GLU B 102      60.333 -38.534   1.911  1.00 52.62           O  
ANISOU 1537  OE2 GLU B 102     6505   5849   7638    -49   -203    174       O  
ATOM   1538  N   ARG B 103      61.159 -35.328   7.912  1.00 27.02           N  
ANISOU 1538  N   ARG B 103     3351   3299   3615    144   -225    636       N  
ATOM   1539  CA  ARG B 103      61.930 -34.592   8.902  1.00 22.75           C  
ANISOU 1539  CA  ARG B 103     2827   2873   2944    218   -275    593       C  
ATOM   1540  C   ARG B 103      63.326 -34.285   8.377  1.00 25.85           C  
ANISOU 1540  C   ARG B 103     3227   3136   3460    205   -303    423       C  
ATOM   1541  O   ARG B 103      63.944 -35.096   7.680  1.00 21.48           O  
ANISOU 1541  O   ARG B 103     2628   2434   3101    163   -310    397       O  
ATOM   1542  CB  ARG B 103      62.034 -35.385  10.204  1.00 25.91           C  
ANISOU 1542  CB  ARG B 103     3156   3385   3304    260   -348    801       C  
ATOM   1543  CG  ARG B 103      60.722 -35.616  10.951  1.00 35.30           C  
ANISOU 1543  CG  ARG B 103     4305   4778   4331    282   -318   1014       C  
ATOM   1544  CD  ARG B 103      60.903 -36.741  11.967  1.00 38.12           C  
ANISOU 1544  CD  ARG B 103     4560   5200   4723    284   -395   1283       C  
ATOM   1545  NE  ARG B 103      61.088 -38.026  11.298  1.00 42.65           N  
ANISOU 1545  NE  ARG B 103     5079   5520   5607    188   -441   1379       N  
ATOM   1546  CZ  ARG B 103      61.489 -39.144  11.896  1.00 42.27           C  
ANISOU 1546  CZ  ARG B 103     4941   5416   5702    168   -541   1594       C  
ATOM   1547  NH1 ARG B 103      61.763 -39.155  13.197  1.00 39.64           N  
ANISOU 1547  NH1 ARG B 103     4562   5296   5205    231   -593   1762       N  
ATOM   1548  NH2 ARG B 103      61.620 -40.255  11.182  1.00 44.16           N  
ANISOU 1548  NH2 ARG B 103     5133   5389   6258     93   -605   1634       N  
ATOM   1549  N   LEU B 104      63.823 -33.099   8.720  1.00 20.85           N  
ANISOU 1549  N   LEU B 104     2636   2563   2722    247   -331    301       N  
ATOM   1550  CA  LEU B 104      65.190 -32.759   8.358  1.00 24.35           C  
ANISOU 1550  CA  LEU B 104     3061   2906   3285    226   -369    173       C  
ATOM   1551  C   LEU B 104      66.183 -33.636   9.107  1.00 28.70           C  
ANISOU 1551  C   LEU B 104     3539   3438   3927    255   -455    240       C  
ATOM   1552  O   LEU B 104      67.151 -34.129   8.516  1.00 31.28           O  
ANISOU 1552  O   LEU B 104     3808   3645   4431    223   -462    188       O  
ATOM   1553  CB  LEU B 104      65.448 -31.279   8.639  1.00 27.75           C  
ANISOU 1553  CB  LEU B 104     3543   3382   3618    257   -415     43       C  
ATOM   1554  CG  LEU B 104      66.469 -30.600   7.729  1.00 36.76           C  
ANISOU 1554  CG  LEU B 104     4666   4405   4896    188   -414    -78       C  
ATOM   1555  CD1 LEU B 104      65.972 -30.597   6.294  1.00 34.20           C  
ANISOU 1555  CD1 LEU B 104     4353   4018   4623    109   -298    -93       C  
ATOM   1556  CD2 LEU B 104      66.750 -29.182   8.204  1.00 35.53           C  
ANISOU 1556  CD2 LEU B 104     4548   4261   4689    217   -510   -186       C  
ATOM   1557  N   ARG B 105      65.943 -33.860  10.400  1.00 23.14           N  
ANISOU 1557  N   ARG B 105     2824   2872   3095    325   -522    362       N  
ATOM   1558  CA  ARG B 105      66.800 -34.685  11.246  1.00 25.81           C  
ANISOU 1558  CA  ARG B 105     3093   3215   3499    359   -621    462       C  
ATOM   1559  C   ARG B 105      68.198 -34.078  11.315  1.00 32.74           C  
ANISOU 1559  C   ARG B 105     3952   4042   4446    373   -695    309       C  
ATOM   1560  O   ARG B 105      68.324 -32.847  11.326  1.00 25.57           O  
ANISOU 1560  O   ARG B 105     3093   3171   3453    387   -709    167       O  
ATOM   1561  CB  ARG B 105      66.838 -36.131  10.739  1.00 31.47           C  
ANISOU 1561  CB  ARG B 105     3742   3781   4436    308   -619    580       C  
ATOM   1562  CG  ARG B 105      65.448 -36.688  10.430  1.00 40.40           C  
ANISOU 1562  CG  ARG B 105     4880   4917   5553    268   -554    716       C  
ATOM   1563  CD  ARG B 105      65.443 -38.200  10.288  1.00 44.92           C  
ANISOU 1563  CD  ARG B 105     5371   5336   6360    231   -612    869       C  
ATOM   1564  NE  ARG B 105      65.605 -38.873  11.571  1.00 51.29           N  
ANISOU 1564  NE  ARG B 105     6113   6229   7146    265   -715   1105       N  
ATOM   1565  CZ  ARG B 105      65.446 -40.180  11.750  1.00 60.39           C  
ANISOU 1565  CZ  ARG B 105     7183   7266   8496    231   -798   1316       C  
ATOM   1566  NH1 ARG B 105      65.117 -40.951  10.722  1.00 63.60           N  
ANISOU 1566  NH1 ARG B 105     7567   7453   9143    173   -800   1281       N  
ATOM   1567  NH2 ARG B 105      65.620 -40.717  12.951  1.00 63.68           N  
ANISOU 1567  NH2 ARG B 105     7533   7785   8876    258   -896   1563       N  
TER    1568      ARG B 105                                                      
ATOM   1569  N   THR C   8      25.560 -18.633  12.611  1.00 85.30           N  
ANISOU 1569  N   THR C   8    11650  11331   9428  -1490   3854   2510       N  
ATOM   1570  CA  THR C   8      25.571 -18.016  11.289  1.00 86.72           C  
ANISOU 1570  CA  THR C   8    11673  11294   9980  -1349   3743   2250       C  
ATOM   1571  C   THR C   8      25.823 -16.511  11.393  1.00 84.66           C  
ANISOU 1571  C   THR C   8    11412  11210   9545  -1198   3810   1915       C  
ATOM   1572  O   THR C   8      25.524 -15.896  12.418  1.00 94.34           O  
ANISOU 1572  O   THR C   8    12665  12708  10473  -1212   4023   1824       O  
ATOM   1573  CB  THR C   8      24.248 -18.267  10.540  1.00 91.58           C  
ANISOU 1573  CB  THR C   8    11979  11725  11091  -1420   3868   2198       C  
ATOM   1574  OG1 THR C   8      24.379 -17.843   9.178  1.00 94.11           O  
ANISOU 1574  OG1 THR C   8    12163  11828  11767  -1298   3693   2002       O  
ATOM   1575  CG2 THR C   8      23.104 -17.505  11.194  1.00 93.39           C  
ANISOU 1575  CG2 THR C   8    12025  12166  11294  -1450   4205   2043       C  
ATOM   1576  N   LEU C   9      26.376 -15.921  10.334  1.00 72.80           N  
ANISOU 1576  N   LEU C   9     9879   9549   8231  -1058   3629   1725       N  
ATOM   1577  CA  LEU C   9      26.714 -14.505  10.348  1.00 70.82           C  
ANISOU 1577  CA  LEU C   9     9643   9418   7846   -921   3656   1405       C  
ATOM   1578  C   LEU C   9      26.820 -13.980   8.922  1.00 66.40           C  
ANISOU 1578  C   LEU C   9     8937   8623   7667   -807   3511   1226       C  
ATOM   1579  O   LEU C   9      27.452 -14.607   8.067  1.00 53.06           O  
ANISOU 1579  O   LEU C   9     7291   6745   6123   -790   3280   1344       O  
ATOM   1580  CB  LEU C   9      28.026 -14.255  11.099  1.00 73.52           C  
ANISOU 1580  CB  LEU C   9    10278   9955   7701   -874   3506   1416       C  
ATOM   1581  CG  LEU C   9      28.369 -12.783  11.328  1.00 73.16           C  
ANISOU 1581  CG  LEU C   9    10267  10055   7475   -758   3540   1066       C  
ATOM   1582  CD1 LEU C   9      27.236 -12.083  12.068  1.00 74.18           C  
ANISOU 1582  CD1 LEU C   9    10256  10342   7586   -777   3862    884       C  
ATOM   1583  CD2 LEU C   9      29.677 -12.650  12.086  1.00 76.57           C  
ANISOU 1583  CD2 LEU C   9    10971  10691   7432   -732   3351   1090       C  
ATOM   1584  N   ARG C  10      26.213 -12.821   8.688  1.00 65.20           N  
ANISOU 1584  N   ARG C  10     8610   8488   7677   -726   3640    944       N  
ATOM   1585  CA  ARG C  10      26.226 -12.207   7.369  1.00 65.43           C  
ANISOU 1585  CA  ARG C  10     8474   8319   8067   -621   3509    780       C  
ATOM   1586  C   ARG C  10      27.660 -11.873   6.956  1.00 62.34           C  
ANISOU 1586  C   ARG C  10     8292   7905   7489   -531   3272    729       C  
ATOM   1587  O   ARG C  10      28.484 -11.517   7.806  1.00 68.56           O  
ANISOU 1587  O   ARG C  10     9308   8870   7870   -510   3249    680       O  
ATOM   1588  CB  ARG C  10      25.357 -10.945   7.385  1.00 76.03           C  
ANISOU 1588  CB  ARG C  10     9608   9694   9587   -537   3681    499       C  
ATOM   1589  CG  ARG C  10      24.974 -10.376   6.025  1.00 81.66           C  
ANISOU 1589  CG  ARG C  10    10065  10201  10759   -445   3563    374       C  
ATOM   1590  CD  ARG C  10      23.915  -9.282   6.164  1.00 88.16           C  
ANISOU 1590  CD  ARG C  10    10659  11039  11801   -365   3735    152       C  
ATOM   1591  NE  ARG C  10      24.270  -8.307   7.194  1.00 93.35           N  
ANISOU 1591  NE  ARG C  10    11479  11858  12132   -304   3863    -53       N  
ATOM   1592  CZ  ARG C  10      24.263  -6.989   7.017  1.00 93.51           C  
ANISOU 1592  CZ  ARG C  10    11439  11830  12262   -174   3854   -309       C  
ATOM   1593  NH1 ARG C  10      23.924  -6.475   5.842  1.00 93.02           N  
ANISOU 1593  NH1 ARG C  10    11157  11571  12617    -83   3716   -365       N  
ATOM   1594  NH2 ARG C  10      24.602  -6.183   8.017  1.00 91.63           N  
ANISOU 1594  NH2 ARG C  10    11361  11735  11718   -140   3960   -500       N  
ATOM   1595  N   PRO C  11      28.003 -12.002   5.674  1.00 52.11           N  
ANISOU 1595  N   PRO C  11     6919   6411   6468   -485   3080    742       N  
ATOM   1596  CA  PRO C  11      29.347 -11.613   5.234  1.00 50.95           C  
ANISOU 1596  CA  PRO C  11     6939   6258   6163   -385   2791    663       C  
ATOM   1597  C   PRO C  11      29.573 -10.119   5.406  1.00 49.78           C  
ANISOU 1597  C   PRO C  11     6796   6199   5917   -286   2836    366       C  
ATOM   1598  O   PRO C  11      28.682  -9.304   5.162  1.00 51.58           O  
ANISOU 1598  O   PRO C  11     6817   6383   6399   -246   2996    197       O  
ATOM   1599  CB  PRO C  11      29.369 -12.014   3.755  1.00 50.17           C  
ANISOU 1599  CB  PRO C  11     6682   5943   6435   -354   2510    689       C  
ATOM   1600  CG  PRO C  11      28.285 -13.030   3.617  1.00 45.41           C  
ANISOU 1600  CG  PRO C  11     5920   5231   6104   -475   2639    864       C  
ATOM   1601  CD  PRO C  11      27.230 -12.623   4.587  1.00 49.87           C  
ANISOU 1601  CD  PRO C  11     6388   5921   6639   -531   3017    828       C  
ATOM   1602  N   MET C  12      30.783  -9.764   5.831  1.00 46.44           N  
ANISOU 1602  N   MET C  12     6602   5889   5152   -247   2685    302       N  
ATOM   1603  CA  MET C  12      31.157  -8.375   6.047  1.00 46.31           C  
ANISOU 1603  CA  MET C  12     6625   5941   5029   -174   2702     11       C  
ATOM   1604  C   MET C  12      32.557  -8.138   5.506  1.00 44.10           C  
ANISOU 1604  C   MET C  12     6460   5641   4654   -114   2348    -28       C  
ATOM   1605  O   MET C  12      33.423  -9.014   5.575  1.00 42.74           O  
ANISOU 1605  O   MET C  12     6425   5506   4307   -134   2152    156       O  
ATOM   1606  CB  MET C  12      31.102  -7.997   7.535  1.00 59.22           C  
ANISOU 1606  CB  MET C  12     8412   7808   6282   -222   2899    -88       C  
ATOM   1607  CG  MET C  12      29.704  -8.001   8.128  1.00 68.33           C  
ANISOU 1607  CG  MET C  12     9401   9006   7557   -262   3181   -102       C  
ATOM   1608  SD  MET C  12      29.678  -7.623   9.890  1.00 78.99           S  
ANISOU 1608  SD  MET C  12    10912  10662   8437   -311   3342   -208       S  
ATOM   1609  CE  MET C  12      30.586  -9.016  10.560  1.00 81.95           C  
ANISOU 1609  CE  MET C  12    11538  11201   8397   -413   3192    140       C  
ATOM   1610  N   PHE C  13      32.773  -6.941   4.964  1.00 41.10           N  
ANISOU 1610  N   PHE C  13     6008   5190   4417    -39   2274   -260       N  
ATOM   1611  CA  PHE C  13      34.086  -6.542   4.462  1.00 40.44           C  
ANISOU 1611  CA  PHE C  13     6009   5095   4262      3   1973   -322       C  
ATOM   1612  C   PHE C  13      34.861  -5.900   5.603  1.00 46.27           C  
ANISOU 1612  C   PHE C  13     6952   6017   4610    -27   1999   -484       C  
ATOM   1613  O   PHE C  13      34.560  -4.780   6.023  1.00 49.13           O  
ANISOU 1613  O   PHE C  13     7312   6390   4965    -17   2161   -740       O  
ATOM   1614  CB  PHE C  13      33.950  -5.592   3.277  1.00 36.61           C  
ANISOU 1614  CB  PHE C  13     5352   4432   4128     78   1873   -455       C  
ATOM   1615  CG  PHE C  13      33.571  -6.277   1.997  1.00 40.01           C  
ANISOU 1615  CG  PHE C  13     5620   4716   4868     97   1733   -293       C  
ATOM   1616  CD1 PHE C  13      34.458  -7.141   1.371  1.00 33.89           C  
ANISOU 1616  CD1 PHE C  13     4901   3929   4047     93   1485   -148       C  
ATOM   1617  CD2 PHE C  13      32.325  -6.067   1.425  1.00 40.96           C  
ANISOU 1617  CD2 PHE C  13     5521   4715   5327    121   1845   -299       C  
ATOM   1618  CE1 PHE C  13      34.117  -7.777   0.197  1.00 34.72           C  
ANISOU 1618  CE1 PHE C  13     4875   3909   4408    100   1362    -38       C  
ATOM   1619  CE2 PHE C  13      31.975  -6.706   0.246  1.00 41.14           C  
ANISOU 1619  CE2 PHE C  13     5401   4625   5604    120   1690   -167       C  
ATOM   1620  CZ  PHE C  13      32.874  -7.564  -0.368  1.00 38.30           C  
ANISOU 1620  CZ  PHE C  13     5128   4260   5164    104   1453    -48       C  
ATOM   1621  N   LYS C  14      35.854  -6.621   6.126  1.00 44.87           N  
ANISOU 1621  N   LYS C  14     6950   5984   4116    -64   1833   -343       N  
ATOM   1622  CA  LYS C  14      36.771  -6.022   7.087  1.00 48.04           C  
ANISOU 1622  CA  LYS C  14     7539   6577   4139   -102   1771   -495       C  
ATOM   1623  C   LYS C  14      37.812  -5.154   6.401  1.00 43.12           C  
ANISOU 1623  C   LYS C  14     6881   5884   3620    -67   1522   -660       C  
ATOM   1624  O   LYS C  14      38.414  -4.294   7.054  1.00 43.67           O  
ANISOU 1624  O   LYS C  14     7057   6062   3472   -107   1492   -878       O  
ATOM   1625  CB  LYS C  14      37.446  -7.109   7.931  1.00 55.27           C  
ANISOU 1625  CB  LYS C  14     8638   7684   4679   -151   1657   -253       C  
ATOM   1626  CG  LYS C  14      36.459  -7.921   8.764  1.00 66.48           C  
ANISOU 1626  CG  LYS C  14    10107   9192   5959   -213   1913    -70       C  
ATOM   1627  CD  LYS C  14      37.109  -8.549   9.989  1.00 75.09           C  
ANISOU 1627  CD  LYS C  14    11357  10537   6636   -264   1788    103       C  
ATOM   1628  CE  LYS C  14      37.897  -9.798   9.623  1.00 77.99           C  
ANISOU 1628  CE  LYS C  14    11798  10849   6985   -240   1548    435       C  
ATOM   1629  NZ  LYS C  14      37.877 -10.798  10.732  1.00 84.71           N  
ANISOU 1629  NZ  LYS C  14    12741  11876   7570   -296   1541    724       N  
ATOM   1630  N   ARG C  15      38.023  -5.361   5.101  1.00 39.27           N  
ANISOU 1630  N   ARG C  15     6247   5222   3451     -8   1352   -566       N  
ATOM   1631  CA  ARG C  15      38.856  -4.498   4.273  1.00 40.98           C  
ANISOU 1631  CA  ARG C  15     6398   5349   3825     18   1159   -699       C  
ATOM   1632  C   ARG C  15      38.218  -4.439   2.894  1.00 40.73           C  
ANISOU 1632  C   ARG C  15     6176   5102   4197     77   1154   -644       C  
ATOM   1633  O   ARG C  15      38.023  -5.480   2.261  1.00 33.32           O  
ANISOU 1633  O   ARG C  15     5177   4114   3370    100   1091   -443       O  
ATOM   1634  CB  ARG C  15      40.287  -5.025   4.188  1.00 40.22           C  
ANISOU 1634  CB  ARG C  15     6359   5351   3572     13    872   -593       C  
ATOM   1635  CG  ARG C  15      41.173  -4.243   3.251  1.00 47.39           C  
ANISOU 1635  CG  ARG C  15     7176   6173   4659     24    690   -698       C  
ATOM   1636  CD  ARG C  15      42.630  -4.582   3.482  1.00 56.54           C  
ANISOU 1636  CD  ARG C  15     8381   7475   5628      8    438   -647       C  
ATOM   1637  NE  ARG C  15      43.500  -3.893   2.535  1.00 63.47           N  
ANISOU 1637  NE  ARG C  15     9148   8276   6691      4    285   -728       N  
ATOM   1638  CZ  ARG C  15      44.822  -3.827   2.654  1.00 69.42           C  
ANISOU 1638  CZ  ARG C  15     9893   9142   7343    -25     75   -747       C  
ATOM   1639  NH1 ARG C  15      45.425  -4.404   3.686  1.00 74.17           N  
ANISOU 1639  NH1 ARG C  15    10592   9938   7651    -40    -38   -685       N  
ATOM   1640  NH2 ARG C  15      45.540  -3.179   1.746  1.00 65.31           N  
ANISOU 1640  NH2 ARG C  15     9255   8547   7013    -43    -26   -812       N  
ATOM   1641  N   LEU C  16      37.878  -3.237   2.443  1.00 38.78           N  
ANISOU 1641  N   LEU C  16     5840   4723   4170     99   1211   -820       N  
ATOM   1642  CA  LEU C  16      37.176  -3.037   1.185  1.00 35.85           C  
ANISOU 1642  CA  LEU C  16     5291   4165   4168    154   1199   -762       C  
ATOM   1643  C   LEU C  16      38.166  -2.893   0.034  1.00 33.74           C  
ANISOU 1643  C   LEU C  16     4983   3842   3997    162    951   -709       C  
ATOM   1644  O   LEU C  16      39.358  -2.650   0.235  1.00 31.62           O  
ANISOU 1644  O   LEU C  16     4794   3651   3570    127    817   -765       O  
ATOM   1645  CB  LEU C  16      36.287  -1.791   1.261  1.00 37.79           C  
ANISOU 1645  CB  LEU C  16     5450   4276   4633    190   1381   -948       C  
ATOM   1646  CG  LEU C  16      35.117  -1.760   2.251  1.00 35.85           C  
ANISOU 1646  CG  LEU C  16     5192   4064   4366    197   1685  -1036       C  
ATOM   1647  CD1 LEU C  16      34.809  -0.330   2.643  1.00 38.37           C  
ANISOU 1647  CD1 LEU C  16     5495   4276   4809    230   1841  -1310       C  
ATOM   1648  CD2 LEU C  16      33.889  -2.412   1.642  1.00 33.11           C  
ANISOU 1648  CD2 LEU C  16     4660   3636   4286    235   1768   -874       C  
ATOM   1649  N   LEU C  17      37.656  -3.046  -1.186  1.00 37.16           N  
ANISOU 1649  N   LEU C  17     5280   4154   4686    199    893   -601       N  
ATOM   1650  CA  LEU C  17      38.461  -2.748  -2.362  1.00 28.36           C  
ANISOU 1650  CA  LEU C  17     4120   2989   3665    200    699   -560       C  
ATOM   1651  C   LEU C  17      38.783  -1.259  -2.389  1.00 29.21           C  
ANISOU 1651  C   LEU C  17     4224   3005   3869    187    704   -709       C  
ATOM   1652  O   LEU C  17      37.940  -0.425  -2.058  1.00 31.68           O  
ANISOU 1652  O   LEU C  17     4498   3209   4331    215    849   -815       O  
ATOM   1653  CB  LEU C  17      37.713  -3.137  -3.639  1.00 28.70           C  
ANISOU 1653  CB  LEU C  17     4032   2941   3932    231    642   -425       C  
ATOM   1654  CG  LEU C  17      37.576  -4.607  -4.048  1.00 32.53           C  
ANISOU 1654  CG  LEU C  17     4507   3471   4383    228    580   -284       C  
ATOM   1655  CD1 LEU C  17      36.613  -4.709  -5.212  1.00 28.67           C  
ANISOU 1655  CD1 LEU C  17     3878   2889   4127    241    534   -205       C  
ATOM   1656  CD2 LEU C  17      38.920  -5.196  -4.426  1.00 29.99           C  
ANISOU 1656  CD2 LEU C  17     4252   3230   3912    219    422   -246       C  
ATOM   1657  N   ALA C  18      40.011  -0.927  -2.775  1.00 30.32           N  
ANISOU 1657  N   ALA C  18     4394   3176   3951    144    555   -722       N  
ATOM   1658  CA  ALA C  18      40.438   0.453  -2.914  1.00 31.71           C  
ANISOU 1658  CA  ALA C  18     4564   3239   4246    107    539   -842       C  
ATOM   1659  C   ALA C  18      40.801   0.725  -4.368  1.00 28.79           C  
ANISOU 1659  C   ALA C  18     4109   2795   4036     99    408   -706       C  
ATOM   1660  O   ALA C  18      41.300  -0.157  -5.074  1.00 23.67           O  
ANISOU 1660  O   ALA C  18     3441   2245   3305     97    301   -580       O  
ATOM   1661  CB  ALA C  18      41.632   0.767  -2.005  1.00 30.42           C  
ANISOU 1661  CB  ALA C  18     4502   3185   3872     27    484   -991       C  
ATOM   1662  N   ASN C  19      40.528   1.949  -4.814  1.00 24.66           N  
ANISOU 1662  N   ASN C  19     3539   2089   3743     96    427   -731       N  
ATOM   1663  CA  ASN C  19      40.899   2.345  -6.167  1.00 24.37           C  
ANISOU 1663  CA  ASN C  19     3440   1987   3833     70    310   -580       C  
ATOM   1664  C   ASN C  19      42.398   2.202  -6.358  1.00 29.93           C  
ANISOU 1664  C   ASN C  19     4174   2818   4378    -20    204   -580       C  
ATOM   1665  O   ASN C  19      43.187   2.410  -5.431  1.00 30.39           O  
ANISOU 1665  O   ASN C  19     4289   2936   4323    -78    204   -729       O  
ATOM   1666  CB  ASN C  19      40.482   3.785  -6.442  1.00 22.75           C  
ANISOU 1666  CB  ASN C  19     3195   1539   3910     74    345   -596       C  
ATOM   1667  CG  ASN C  19      38.989   3.952  -6.488  1.00 30.76           C  
ANISOU 1667  CG  ASN C  19     4127   2418   5142    183    431   -562       C  
ATOM   1668  OD1 ASN C  19      38.270   3.086  -6.990  1.00 32.14           O  
ANISOU 1668  OD1 ASN C  19     4238   2668   5307    235    401   -432       O  
ATOM   1669  ND2 ASN C  19      38.504   5.060  -5.940  1.00 32.54           N  
ANISOU 1669  ND2 ASN C  19     4340   2437   5589    219    542   -695       N  
ATOM   1670  N   ALA C  20      42.791   1.838  -7.571  1.00 24.49           N  
ANISOU 1670  N   ALA C  20     3439   2188   3679    -36    113   -419       N  
ATOM   1671  CA  ALA C  20      44.183   1.577  -7.857  1.00 21.91           C  
ANISOU 1671  CA  ALA C  20     3104   1999   3221   -109     36   -411       C  
ATOM   1672  C   ALA C  20      44.539   2.138  -9.222  1.00 29.35           C  
ANISOU 1672  C   ALA C  20     3995   2904   4253   -168    -10   -262       C  
ATOM   1673  O   ALA C  20      43.681   2.391 -10.072  1.00 26.39           O  
ANISOU 1673  O   ALA C  20     3600   2439   3987   -137    -18   -128       O  
ATOM   1674  CB  ALA C  20      44.502   0.074  -7.808  1.00 23.18           C  
ANISOU 1674  CB  ALA C  20     3270   2346   3192    -58     -2   -385       C  
ATOM   1675  N   GLU C  21      45.835   2.296  -9.419  1.00 25.87           N  
ANISOU 1675  N   GLU C  21     3524   2553   3753   -258    -44   -273       N  
ATOM   1676  CA  GLU C  21      46.401   2.770 -10.664  1.00 24.47           C  
ANISOU 1676  CA  GLU C  21     3299   2384   3616   -341    -62   -127       C  
ATOM   1677  C   GLU C  21      47.693   2.007 -10.876  1.00 25.26           C  
ANISOU 1677  C   GLU C  21     3340   2696   3563   -377    -82   -150       C  
ATOM   1678  O   GLU C  21      48.402   1.709  -9.914  1.00 22.58           O  
ANISOU 1678  O   GLU C  21     2981   2436   3163   -381   -105   -284       O  
ATOM   1679  CB  GLU C  21      46.647   4.281 -10.590  1.00 26.21           C  
ANISOU 1679  CB  GLU C  21     3515   2409   4035   -449    -44   -127       C  
ATOM   1680  CG  GLU C  21      47.561   4.836 -11.621  1.00 41.57           C  
ANISOU 1680  CG  GLU C  21     5406   4378   6009   -577    -47     14       C  
ATOM   1681  CD  GLU C  21      49.014   4.682 -11.248  1.00 43.01           C  
ANISOU 1681  CD  GLU C  21     5514   4708   6118   -676    -52    -93       C  
ATOM   1682  OE1 GLU C  21      49.373   4.958 -10.083  1.00 44.01           O  
ANISOU 1682  OE1 GLU C  21     5644   4801   6279   -708    -73   -279       O  
ATOM   1683  OE2 GLU C  21      49.791   4.255 -12.122  1.00 42.09           O  
ANISOU 1683  OE2 GLU C  21     5330   4760   5904   -720    -36      1       O  
ATOM   1684  N  ACYS C  22      47.989   1.672 -12.126  0.74 26.07           N  
ANISOU 1684  N  ACYS C  22     3407   2903   3596   -397    -74    -23       N  
ATOM   1685  N  BCYS C  22      48.015   1.725 -12.139  0.26 26.23           N  
ANISOU 1685  N  BCYS C  22     3426   2920   3621   -403    -73    -21       N  
ATOM   1686  CA ACYS C  22      49.290   1.105 -12.419  0.74 25.98           C  
ANISOU 1686  CA ACYS C  22     3309   3080   3483   -433    -60    -53       C  
ATOM   1687  CA BCYS C  22      49.203   0.958 -12.484  0.26 26.12           C  
ANISOU 1687  CA BCYS C  22     3332   3108   3485   -418    -60    -49       C  
ATOM   1688  C  ACYS C  22      49.699   1.491 -13.829  0.74 28.40           C  
ANISOU 1688  C  ACYS C  22     3580   3451   3761   -526     -8     98       C  
ATOM   1689  C  BCYS C  22      49.679   1.362 -13.875  0.26 26.59           C  
ANISOU 1689  C  BCYS C  22     3351   3235   3515   -515     -8     96       C  
ATOM   1690  O  ACYS C  22      48.874   1.865 -14.667  0.74 25.87           O  
ANISOU 1690  O  ACYS C  22     3322   3064   3445   -536    -11    243       O  
ATOM   1691  O  BCYS C  22      48.861   1.638 -14.757  0.26 26.60           O  
ANISOU 1691  O  BCYS C  22     3414   3186   3505   -521    -11    238       O  
ATOM   1692  CB ACYS C  22      49.300  -0.416 -12.238  0.74 26.08           C  
ANISOU 1692  CB ACYS C  22     3320   3228   3363   -305    -76   -123       C  
ATOM   1693  CB BCYS C  22      48.899  -0.546 -12.417  0.26 25.73           C  
ANISOU 1693  CB BCYS C  22     3303   3166   3309   -283    -76   -100       C  
ATOM   1694  SG ACYS C  22      48.417  -1.334 -13.505  0.74 24.71           S  
ANISOU 1694  SG ACYS C  22     3200   3105   3084   -235    -63    -37       S  
ATOM   1695  SG BCYS C  22      50.203  -1.666 -12.974  0.26 27.25           S  
ANISOU 1695  SG BCYS C  22     3387   3576   3389   -252    -44   -148       S  
ATOM   1696  N   GLN C  23      51.000   1.419 -14.061  1.00 22.31           N  
ANISOU 1696  N   GLN C  23     2698   2821   2960   -599     38     72       N  
ATOM   1697  CA  GLN C  23      51.560   1.640 -15.384  1.00 23.88           C  
ANISOU 1697  CA  GLN C  23     2850   3133   3089   -697    126    204       C  
ATOM   1698  C   GLN C  23      51.411   0.367 -16.200  1.00 25.20           C  
ANISOU 1698  C   GLN C  23     3037   3474   3064   -597    161    184       C  
ATOM   1699  O   GLN C  23      51.553  -0.739 -15.671  1.00 20.88           O  
ANISOU 1699  O   GLN C  23     2464   2990   2480   -475    140     43       O  
ATOM   1700  CB  GLN C  23      53.033   2.029 -15.274  1.00 24.40           C  
ANISOU 1700  CB  GLN C  23     2757   3292   3222   -819    187    165       C  
ATOM   1701  CG  GLN C  23      53.777   2.203 -16.593  1.00 29.09           C  
ANISOU 1701  CG  GLN C  23     3280   4042   3732   -934    322    292       C  
ATOM   1702  CD  GLN C  23      55.273   2.423 -16.372  1.00 37.18           C  
ANISOU 1702  CD  GLN C  23     4097   5177   4852  -1044    391    228       C  
ATOM   1703  OE1 GLN C  23      55.776   2.237 -15.267  1.00 42.67           O  
ANISOU 1703  OE1 GLN C  23     4700   5864   5649  -1010    308     76       O  
ATOM   1704  NE2 GLN C  23      55.980   2.829 -17.418  1.00 34.70           N  
ANISOU 1704  NE2 GLN C  23     3703   4980   4501  -1186    537    353       N  
ATOM   1705  N   GLU C  24      51.119   0.516 -17.488  1.00 22.82           N  
ANISOU 1705  N   GLU C  24     2790   3244   2637   -652    209    325       N  
ATOM   1706  CA  GLU C  24      50.942  -0.670 -18.314  1.00 25.85           C  
ANISOU 1706  CA  GLU C  24     3209   3792   2822   -574    242    269       C  
ATOM   1707  C   GLU C  24      52.245  -1.465 -18.379  1.00 28.93           C  
ANISOU 1707  C   GLU C  24     3463   4362   3168   -546    356    124       C  
ATOM   1708  O   GLU C  24      53.344  -0.903 -18.397  1.00 24.76           O  
ANISOU 1708  O   GLU C  24     2807   3901   2701   -646    442    143       O  
ATOM   1709  CB  GLU C  24      50.448  -0.287 -19.707  1.00 26.49           C  
ANISOU 1709  CB  GLU C  24     3382   3952   2732   -661    262    448       C  
ATOM   1710  CG  GLU C  24      51.473   0.242 -20.655  1.00 42.47           C  
ANISOU 1710  CG  GLU C  24     5350   6139   4649   -808    408    553       C  
ATOM   1711  CD  GLU C  24      50.906   0.383 -22.054  1.00 55.68           C  
ANISOU 1711  CD  GLU C  24     7145   7936   6075   -881    412    727       C  
ATOM   1712  OE1 GLU C  24      50.717  -0.653 -22.726  1.00 60.52           O  
ANISOU 1712  OE1 GLU C  24     7809   8716   6469   -823    434    613       O  
ATOM   1713  OE2 GLU C  24      50.636   1.528 -22.477  1.00 61.60           O  
ANISOU 1713  OE2 GLU C  24     7945   8609   6851   -997    383    978       O  
ATOM   1714  N   GLY C  25      52.115  -2.791 -18.371  1.00 24.21           N  
ANISOU 1714  N   GLY C  25     2877   3822   2501   -408    353    -27       N  
ATOM   1715  CA  GLY C  25      53.262  -3.662 -18.260  1.00 23.46           C  
ANISOU 1715  CA  GLY C  25     2637   3851   2425   -332    443   -181       C  
ATOM   1716  C   GLY C  25      53.684  -3.959 -16.838  1.00 29.71           C  
ANISOU 1716  C   GLY C  25     3337   4557   3394   -239    353   -267       C  
ATOM   1717  O   GLY C  25      54.515  -4.850 -16.628  1.00 29.89           O  
ANISOU 1717  O   GLY C  25     3237   4656   3466   -135    388   -386       O  
ATOM   1718  N   GLN C  26      53.152  -3.240 -15.854  1.00 25.22           N  
ANISOU 1718  N   GLN C  26     2824   3839   2921   -269    236   -211       N  
ATOM   1719  CA  GLN C  26      53.456  -3.528 -14.462  1.00 20.76           C  
ANISOU 1719  CA  GLN C  26     2205   3217   2466   -191    134   -288       C  
ATOM   1720  C   GLN C  26      52.306  -4.324 -13.864  1.00 25.05           C  
ANISOU 1720  C   GLN C  26     2888   3642   2987    -69     49   -311       C  
ATOM   1721  O   GLN C  26      51.336  -4.670 -14.542  1.00 23.94           O  
ANISOU 1721  O   GLN C  26     2860   3463   2775    -47     63   -285       O  
ATOM   1722  CB  GLN C  26      53.721  -2.247 -13.668  1.00 21.08           C  
ANISOU 1722  CB  GLN C  26     2213   3185   2610   -317     76   -254       C  
ATOM   1723  CG  GLN C  26      54.931  -1.450 -14.136  1.00 25.60           C  
ANISOU 1723  CG  GLN C  26     2621   3858   3247   -464    156   -227       C  
ATOM   1724  CD  GLN C  26      56.254  -2.108 -13.796  1.00 27.99           C  
ANISOU 1724  CD  GLN C  26     2710   4311   3613   -409    158   -325       C  
ATOM   1725  OE1 GLN C  26      56.342  -2.924 -12.876  1.00 25.24           O  
ANISOU 1725  OE1 GLN C  26     2342   3963   3285   -275     50   -401       O  
ATOM   1726  NE2 GLN C  26      57.296  -1.750 -14.539  1.00 26.09           N  
ANISOU 1726  NE2 GLN C  26     2297   4203   3414   -513    281   -306       N  
ATOM   1727  N   SER C  27      52.420  -4.617 -12.575  1.00 30.15           N  
ANISOU 1727  N   SER C  27     3524   4243   3689     -1    -46   -353       N  
ATOM   1728  CA  SER C  27      51.444  -5.431 -11.875  1.00 31.83           C  
ANISOU 1728  CA  SER C  27     3854   4353   3885    105   -108   -359       C  
ATOM   1729  C   SER C  27      50.626  -4.580 -10.917  1.00 26.71           C  
ANISOU 1729  C   SER C  27     3304   3595   3250     51   -160   -332       C  
ATOM   1730  O   SER C  27      51.072  -3.528 -10.449  1.00 30.93           O  
ANISOU 1730  O   SER C  27     3803   4129   3821    -45   -182   -345       O  
ATOM   1731  CB  SER C  27      52.127  -6.567 -11.110  1.00 29.46           C  
ANISOU 1731  CB  SER C  27     3488   4089   3616    238   -168   -404       C  
ATOM   1732  OG  SER C  27      52.808  -7.412 -12.016  1.00 38.02           O  
ANISOU 1732  OG  SER C  27     4478   5246   4723    312    -97   -457       O  
ATOM   1733  N   VAL C  28      49.416  -5.054 -10.633  1.00 21.80           N  
ANISOU 1733  N   VAL C  28     2798   2874   2613    108   -169   -310       N  
ATOM   1734  CA  VAL C  28      48.545  -4.416  -9.662  1.00 23.11           C  
ANISOU 1734  CA  VAL C  28     3049   2938   2792     81   -185   -306       C  
ATOM   1735  C   VAL C  28      47.808  -5.504  -8.898  1.00 25.04           C  
ANISOU 1735  C   VAL C  28     3371   3139   3005    177   -199   -297       C  
ATOM   1736  O   VAL C  28      47.547  -6.595  -9.416  1.00 24.15           O  
ANISOU 1736  O   VAL C  28     3266   3013   2897    246   -192   -278       O  
ATOM   1737  CB  VAL C  28      47.562  -3.419 -10.323  1.00 22.86           C  
ANISOU 1737  CB  VAL C  28     3061   2803   2821     13   -144   -254       C  
ATOM   1738  CG1 VAL C  28      46.405  -4.145 -10.980  1.00 21.13           C  
ANISOU 1738  CG1 VAL C  28     2890   2535   2602     65   -133   -204       C  
ATOM   1739  CG2 VAL C  28      47.066  -2.408  -9.301  1.00 29.77           C  
ANISOU 1739  CG2 VAL C  28     3984   3575   3752    -28   -136   -292       C  
ATOM   1740  N   CYS C  29      47.482  -5.196  -7.649  1.00 28.06           N  
ANISOU 1740  N   CYS C  29     3814   3495   3352    169   -210   -317       N  
ATOM   1741  CA  CYS C  29      46.879  -6.148  -6.732  1.00 26.12           C  
ANISOU 1741  CA  CYS C  29     3647   3226   3053    239   -210   -283       C  
ATOM   1742  C   CYS C  29      45.720  -5.477  -6.008  1.00 28.97           C  
ANISOU 1742  C   CYS C  29     4088   3509   3411    201   -136   -302       C  
ATOM   1743  O   CYS C  29      45.895  -4.405  -5.424  1.00 25.10           O  
ANISOU 1743  O   CYS C  29     3613   3025   2898    139   -128   -380       O  
ATOM   1744  CB  CYS C  29      47.920  -6.642  -5.727  1.00 26.99           C  
ANISOU 1744  CB  CYS C  29     3746   3441   3068    279   -301   -281       C  
ATOM   1745  SG  CYS C  29      47.261  -7.736  -4.466  1.00 45.92           S  
ANISOU 1745  SG  CYS C  29     6262   5820   5364    346   -304   -190       S  
ATOM   1746  N   PHE C  30      44.546  -6.097  -6.050  1.00 28.88           N  
ANISOU 1746  N   PHE C  30     4115   3418   3441    234    -74   -249       N  
ATOM   1747  CA  PHE C  30      43.404  -5.674  -5.244  1.00 29.95           C  
ANISOU 1747  CA  PHE C  30     4304   3492   3582    216     26   -266       C  
ATOM   1748  C   PHE C  30      43.252  -6.621  -4.061  1.00 28.83           C  
ANISOU 1748  C   PHE C  30     4244   3395   3315    246     51   -215       C  
ATOM   1749  O   PHE C  30      43.177  -7.835  -4.250  1.00 33.43           O  
ANISOU 1749  O   PHE C  30     4833   3957   3914    292     28   -122       O  
ATOM   1750  CB  PHE C  30      42.114  -5.675  -6.063  1.00 30.93           C  
ANISOU 1750  CB  PHE C  30     4385   3506   3862    218     84   -224       C  
ATOM   1751  CG  PHE C  30      41.987  -4.519  -7.007  1.00 34.69           C  
ANISOU 1751  CG  PHE C  30     4801   3927   4455    184     69   -241       C  
ATOM   1752  CD1 PHE C  30      41.597  -3.272  -6.554  1.00 35.81           C  
ANISOU 1752  CD1 PHE C  30     4942   3997   4669    160    133   -304       C  
ATOM   1753  CD2 PHE C  30      42.244  -4.686  -8.355  1.00 37.75           C  
ANISOU 1753  CD2 PHE C  30     5140   4327   4878    176     -5   -191       C  
ATOM   1754  CE1 PHE C  30      41.472  -2.212  -7.436  1.00 39.25           C  
ANISOU 1754  CE1 PHE C  30     5324   4349   5243    134    109   -283       C  
ATOM   1755  CE2 PHE C  30      42.120  -3.633  -9.236  1.00 41.40           C  
ANISOU 1755  CE2 PHE C  30     5558   4744   5427    137    -27   -161       C  
ATOM   1756  CZ  PHE C  30      41.738  -2.396  -8.778  1.00 43.58           C  
ANISOU 1756  CZ  PHE C  30     5829   4923   5806    120     23   -190       C  
ATOM   1757  N   GLU C  31      43.190  -6.071  -2.852  1.00 25.43           N  
ANISOU 1757  N   GLU C  31     3887   3021   2755    215    103   -276       N  
ATOM   1758  CA  GLU C  31      43.095  -6.864  -1.631  1.00 30.65           C  
ANISOU 1758  CA  GLU C  31     4649   3759   3239    227    129   -207       C  
ATOM   1759  C   GLU C  31      41.783  -6.586  -0.908  1.00 36.45           C  
ANISOU 1759  C   GLU C  31     5433   4459   3956    197    317   -234       C  
ATOM   1760  O   GLU C  31      41.337  -5.434  -0.834  1.00 37.97           O  
ANISOU 1760  O   GLU C  31     5608   4613   4204    166    407   -370       O  
ATOM   1761  CB  GLU C  31      44.257  -6.560  -0.678  1.00 42.31           C  
ANISOU 1761  CB  GLU C  31     6183   5390   4503    203     20   -258       C  
ATOM   1762  CG  GLU C  31      45.625  -6.975  -1.177  1.00 58.36           C  
ANISOU 1762  CG  GLU C  31     8139   7481   6553    243   -161   -217       C  
ATOM   1763  CD  GLU C  31      46.701  -6.803  -0.115  1.00 67.74           C  
ANISOU 1763  CD  GLU C  31     9366   8841   7532    218   -299   -245       C  
ATOM   1764  OE1 GLU C  31      46.435  -6.112   0.891  1.00 72.16           O  
ANISOU 1764  OE1 GLU C  31    10023   9474   7919    148   -253   -343       O  
ATOM   1765  OE2 GLU C  31      47.807  -7.362  -0.281  1.00 70.21           O  
ANISOU 1765  OE2 GLU C  31     9602   9220   7854    270   -455   -179       O  
ATOM   1766  N   ILE C  32      41.174  -7.644  -0.360  1.00 25.40           N  
ANISOU 1766  N   ILE C  32     4087   3063   2500    207    389   -101       N  
ATOM   1767  CA  ILE C  32      40.016  -7.519   0.520  1.00 31.13           C  
ANISOU 1767  CA  ILE C  32     4860   3798   3172    170    596   -111       C  
ATOM   1768  C   ILE C  32      40.135  -8.517   1.663  1.00 35.23           C  
ANISOU 1768  C   ILE C  32     5509   4425   3454    156    618     40       C  
ATOM   1769  O   ILE C  32      40.886  -9.494   1.598  1.00 34.45           O  
ANISOU 1769  O   ILE C  32     5439   4336   3313    193    470    188       O  
ATOM   1770  CB  ILE C  32      38.674  -7.761  -0.202  1.00 33.47           C  
ANISOU 1770  CB  ILE C  32     5040   3948   3727    172    718    -69       C  
ATOM   1771  CG1 ILE C  32      38.699  -9.125  -0.895  1.00 39.59           C  
ANISOU 1771  CG1 ILE C  32     5786   4645   4613    191    625     95       C  
ATOM   1772  CG2 ILE C  32      38.368  -6.636  -1.172  1.00 33.65           C  
ANISOU 1772  CG2 ILE C  32     4944   3876   3966    186    709   -194       C  
ATOM   1773  CD1 ILE C  32      37.382  -9.525  -1.515  1.00 46.38           C  
ANISOU 1773  CD1 ILE C  32     6531   5378   5714    167    719    141       C  
ATOM   1774  N  AARG C  33      39.381  -8.249   2.726  0.61 36.03           N  
ANISOU 1774  N  AARG C  33     5688   4604   3399    106    814      8       N  
ATOM   1775  N  BARG C  33      39.359  -8.269   2.716  0.39 36.21           N  
ANISOU 1775  N  BARG C  33     5710   4624   3426    106    816     11       N  
ATOM   1776  CA AARG C  33      39.225  -9.176   3.841  0.61 38.79           C  
ANISOU 1776  CA AARG C  33     6171   5060   3508     71    885    185       C  
ATOM   1777  CA BARG C  33      39.233  -9.194   3.836  0.39 38.68           C  
ANISOU 1777  CA BARG C  33     6157   5046   3494     72    882    189       C  
ATOM   1778  C  AARG C  33      37.736  -9.350   4.091  0.61 39.24           C  
ANISOU 1778  C  AARG C  33     6186   5062   3661     25   1163    219       C  
ATOM   1779  C  BARG C  33      37.756  -9.364   4.149  0.39 39.38           C  
ANISOU 1779  C  BARG C  33     6212   5089   3663     24   1164    223       C  
ATOM   1780  O  AARG C  33      37.030  -8.368   4.344  0.61 40.71           O  
ANISOU 1780  O  AARG C  33     6334   5265   3868      5   1350     35       O  
ATOM   1781  O  BARG C  33      37.082  -8.395   4.515  0.39 41.30           O  
ANISOU 1781  O  BARG C  33     6434   5365   3894     -1   1356     41       O  
ATOM   1782  CB AARG C  33      39.935  -8.667   5.100  0.61 41.36           C  
ANISOU 1782  CB AARG C  33     6658   5611   3446     31    855    109       C  
ATOM   1783  CB BARG C  33      40.002  -8.695   5.062  0.39 41.11           C  
ANISOU 1783  CB BARG C  33     6625   5577   3418     34    838    115       C  
ATOM   1784  CG AARG C  33      41.459  -8.662   5.005  0.61 40.07           C  
ANISOU 1784  CG AARG C  33     6516   5529   3180     65    559    113       C  
ATOM   1785  CG BARG C  33      41.509  -8.650   4.856  0.39 39.65           C  
ANISOU 1785  CG BARG C  33     6446   5459   3162     72    543    109       C  
ATOM   1786  CD AARG C  33      42.099  -8.356   6.355  0.61 41.84           C  
ANISOU 1786  CD AARG C  33     6907   6002   2987      7    499     72       C  
ATOM   1787  CD BARG C  33      42.255  -8.449   6.163  0.39 41.07           C  
ANISOU 1787  CD BARG C  33     6787   5883   2933     22    456     91       C  
ATOM   1788  NE AARG C  33      41.892  -9.436   7.317  0.61 42.57           N  
ANISOU 1788  NE AARG C  33     7142   6207   2827    -12    533    335       N  
ATOM   1789  NE BARG C  33      43.695  -8.338   5.953  0.39 39.61           N  
ANISOU 1789  NE BARG C  33     6563   5767   2718     54    163     73       N  
ATOM   1790  CZ AARG C  33      41.813  -9.267   8.631  0.61 48.10           C  
ANISOU 1790  CZ AARG C  33     8021   7135   3121    -91    608    328       C  
ATOM   1791  CZ BARG C  33      44.530  -9.371   5.917  0.39 38.92           C  
ANISOU 1791  CZ BARG C  33     6466   5702   2619    122    -46    300       C  
ATOM   1792  NH1AARG C  33      41.920  -8.054   9.155  0.61 52.28           N  
ANISOU 1792  NH1AARG C  33     8597   7797   3472   -154    656     29       N  
ATOM   1793  NH1BARG C  33      44.073 -10.605   6.080  0.39 40.46           N  
ANISOU 1793  NH1BARG C  33     6711   5833   2830    160     -1    570       N  
ATOM   1794  NH2AARG C  33      41.623 -10.313   9.424  0.61 49.34           N  
ANISOU 1794  NH2AARG C  33     8296   7384   3067   -112    632    618       N  
ATOM   1795  NH2BARG C  33      45.825  -9.170   5.722  0.39 38.55           N  
ANISOU 1795  NH2BARG C  33     6344   5727   2575    152   -297    260       N  
ATOM   1796  N   VAL C  34      37.255 -10.587   3.999  1.00 35.21           N  
ANISOU 1796  N   VAL C  34     5664   4468   3245      9   1197    447       N  
ATOM   1797  CA  VAL C  34      35.835 -10.888   4.139  1.00 42.31           C  
ANISOU 1797  CA  VAL C  34     6484   5302   4289    -51   1454    505       C  
ATOM   1798  C   VAL C  34      35.662 -11.940   5.224  1.00 47.10           C  
ANISOU 1798  C   VAL C  34     7234   5990   4673   -121   1561    756       C  
ATOM   1799  O   VAL C  34      36.264 -13.016   5.154  1.00 51.11           O  
ANISOU 1799  O   VAL C  34     7809   6438   5172   -105   1399    973       O  
ATOM   1800  CB  VAL C  34      35.220 -11.376   2.820  1.00 45.24           C  
ANISOU 1800  CB  VAL C  34     6670   5457   5061    -39   1401    542       C  
ATOM   1801  CG1 VAL C  34      33.715 -11.190   2.856  1.00 57.90           C  
ANISOU 1801  CG1 VAL C  34     8125   7011   6864    -95   1660    512       C  
ATOM   1802  CG2 VAL C  34      35.832 -10.654   1.636  1.00 42.44           C  
ANISOU 1802  CG2 VAL C  34     6227   5036   4862     35   1200    381       C  
ATOM   1803  N   SER C  35      34.822 -11.640   6.208  1.00 44.79           N  
ANISOU 1803  N   SER C  35     6983   5823   4214   -195   1847    734       N  
ATOM   1804  CA  SER C  35      34.457 -12.573   7.260  1.00 50.35           C  
ANISOU 1804  CA  SER C  35     7818   6617   4697   -286   2008    992       C  
ATOM   1805  C   SER C  35      33.030 -13.057   7.045  1.00 56.96           C  
ANISOU 1805  C   SER C  35     8491   7326   5825   -365   2268   1078       C  
ATOM   1806  O   SER C  35      32.276 -12.508   6.238  1.00 58.15           O  
ANISOU 1806  O   SER C  35     8428   7362   6304   -343   2337    906       O  
ATOM   1807  CB  SER C  35      34.595 -11.922   8.641  1.00 54.96           C  
ANISOU 1807  CB  SER C  35     8581   7486   4817   -335   2159    906       C  
ATOM   1808  OG  SER C  35      33.698 -10.831   8.775  1.00 58.67           O  
ANISOU 1808  OG  SER C  35     8924   7999   5370   -344   2400    622       O  
ATOM   1809  N   GLY C  36      32.666 -14.093   7.777  1.00 55.61           N  
ANISOU 1809  N   GLY C  36     8399   7180   5552   -462   2383   1354       N  
ATOM   1810  CA  GLY C  36      31.327 -14.651   7.724  1.00 56.62           C  
ANISOU 1810  CA  GLY C  36     8344   7211   5959   -563   2592   1443       C  
ATOM   1811  C   GLY C  36      31.335 -16.133   8.050  1.00 60.56           C  
ANISOU 1811  C   GLY C  36     8905   7625   6478   -650   2514   1782       C  
ATOM   1812  O   GLY C  36      32.260 -16.875   7.736  1.00 62.81           O  
ANISOU 1812  O   GLY C  36     9300   7793   6772   -602   2266   1943       O  
ATOM   1813  N   ILE C  37      30.271 -16.578   8.710  1.00 62.92           N  
ANISOU 1813  N   ILE C  37     9123   7978   6804   -781   2729   1889       N  
ATOM   1814  CA  ILE C  37      30.057 -17.984   9.021  1.00 62.50           C  
ANISOU 1814  CA  ILE C  37     9105   7820   6822   -897   2691   2206       C  
ATOM   1815  C   ILE C  37      28.726 -18.399   8.404  1.00 61.91           C  
ANISOU 1815  C   ILE C  37     8780   7563   7179   -995   2841   2195       C  
ATOM   1816  O   ILE C  37      27.684 -17.839   8.756  1.00 63.16           O  
ANISOU 1816  O   ILE C  37     8788   7843   7366  -1051   3098   2076       O  
ATOM   1817  CB  ILE C  37      30.058 -18.262  10.534  1.00 68.87           C  
ANISOU 1817  CB  ILE C  37    10065   8893   7209  -1001   2795   2396       C  
ATOM   1818  CG1 ILE C  37      30.999 -17.302  11.265  1.00 72.40           C  
ANISOU 1818  CG1 ILE C  37    10679   9628   7200   -915   2731   2264       C  
ATOM   1819  CG2 ILE C  37      30.455 -19.706  10.802  1.00 73.07           C  
ANISOU 1819  CG2 ILE C  37    10722   9290   7750  -1082   2626   2755       C  
ATOM   1820  CD1 ILE C  37      30.963 -17.447  12.778  1.00 77.47           C  
ANISOU 1820  CD1 ILE C  37    11452  10591   7394  -1020   2835   2424       C  
ATOM   1821  N   PRO C  38      28.700 -19.374   7.478  1.00 64.59           N  
ANISOU 1821  N   PRO C  38     9053   7614   7875  -1018   2675   2295       N  
ATOM   1822  CA  PRO C  38      29.845 -20.113   6.930  1.00 64.23           C  
ANISOU 1822  CA  PRO C  38     9145   7380   7881   -938   2370   2405       C  
ATOM   1823  C   PRO C  38      30.724 -19.239   6.046  1.00 62.06           C  
ANISOU 1823  C   PRO C  38     8880   7085   7614   -769   2210   2192       C  
ATOM   1824  O   PRO C  38      30.261 -18.183   5.620  1.00 57.27           O  
ANISOU 1824  O   PRO C  38     8138   6540   7081   -737   2328   1961       O  
ATOM   1825  CB  PRO C  38      29.182 -21.227   6.104  1.00 68.00           C  
ANISOU 1825  CB  PRO C  38     9480   7559   8797  -1030   2303   2468       C  
ATOM   1826  CG  PRO C  38      27.769 -21.298   6.591  1.00 69.48           C  
ANISOU 1826  CG  PRO C  38     9507   7815   9076  -1192   2573   2494       C  
ATOM   1827  CD  PRO C  38      27.424 -19.891   6.959  1.00 68.66           C  
ANISOU 1827  CD  PRO C  38     9329   7969   8789  -1139   2781   2291       C  
ATOM   1828  N   PRO C  39      31.965 -19.656   5.802  1.00 62.36           N  
ANISOU 1828  N   PRO C  39     9066   7041   7586   -663   1950   2270       N  
ATOM   1829  CA  PRO C  39      32.855 -18.879   4.934  1.00 60.50           C  
ANISOU 1829  CA  PRO C  39     8843   6786   7357   -510   1793   2081       C  
ATOM   1830  C   PRO C  39      32.194 -18.605   3.596  1.00 56.57           C  
ANISOU 1830  C   PRO C  39     8120   6125   7250   -515   1777   1867       C  
ATOM   1831  O   PRO C  39      31.756 -19.536   2.903  1.00 55.34           O  
ANISOU 1831  O   PRO C  39     7867   5736   7423   -578   1716   1918       O  
ATOM   1832  CB  PRO C  39      34.080 -19.791   4.780  1.00 62.00           C  
ANISOU 1832  CB  PRO C  39     9162   6850   7545   -414   1504   2230       C  
ATOM   1833  CG  PRO C  39      34.092 -20.594   6.028  1.00 65.17           C  
ANISOU 1833  CG  PRO C  39     9692   7331   7737   -497   1524   2500       C  
ATOM   1834  CD  PRO C  39      32.645 -20.828   6.382  1.00 65.46           C  
ANISOU 1834  CD  PRO C  39     9619   7366   7886   -674   1785   2542       C  
ATOM   1835  N   PRO C  40      32.075 -17.340   3.212  1.00 54.02           N  
ANISOU 1835  N   PRO C  40     7691   5934   6899   -456   1785   1595       N  
ATOM   1836  CA  PRO C  40      31.308 -17.003   2.012  1.00 50.27           C  
ANISOU 1836  CA  PRO C  40     6981   5347   6773   -469   1751   1403       C  
ATOM   1837  C   PRO C  40      32.073 -17.321   0.738  1.00 49.22           C  
ANISOU 1837  C   PRO C  40     6833   5066   6804   -388   1451   1305       C  
ATOM   1838  O   PRO C  40      33.302 -17.394   0.709  1.00 45.33           O  
ANISOU 1838  O   PRO C  40     6480   4597   6149   -283   1274   1307       O  
ATOM   1839  CB  PRO C  40      31.079 -15.496   2.154  1.00 41.20           C  
ANISOU 1839  CB  PRO C  40     5758   4386   5509   -411   1851   1179       C  
ATOM   1840  CG  PRO C  40      32.257 -15.026   2.932  1.00 44.48           C  
ANISOU 1840  CG  PRO C  40     6390   4974   5536   -328   1788   1169       C  
ATOM   1841  CD  PRO C  40      32.595 -16.141   3.891  1.00 49.19           C  
ANISOU 1841  CD  PRO C  40     7173   5575   5943   -383   1823   1456       C  
ATOM   1842  N   THR C  41      31.306 -17.525  -0.327  1.00 47.61           N  
ANISOU 1842  N   THR C  41     6444   4721   6926   -444   1401   1211       N  
ATOM   1843  CA  THR C  41      31.860 -17.691  -1.658  1.00 43.54           C  
ANISOU 1843  CA  THR C  41     5895   4096   6551   -383   1144   1068       C  
ATOM   1844  C   THR C  41      31.903 -16.336  -2.349  1.00 48.83           C  
ANISOU 1844  C   THR C  41     6466   4900   7186   -306   1071    852       C  
ATOM   1845  O   THR C  41      31.023 -15.493  -2.143  1.00 51.49           O  
ANISOU 1845  O   THR C  41     6671   5323   7571   -331   1211    797       O  
ATOM   1846  CB  THR C  41      31.029 -18.684  -2.471  1.00 48.15           C  
ANISOU 1846  CB  THR C  41     6351   4462   7481   -505   1099   1073       C  
ATOM   1847  OG1 THR C  41      29.670 -18.234  -2.532  1.00 60.74           O  
ANISOU 1847  OG1 THR C  41     7728   6092   9257   -607   1237   1036       O  
ATOM   1848  CG2 THR C  41      31.065 -20.065  -1.822  1.00 44.64           C  
ANISOU 1848  CG2 THR C  41     6018   3834   7109   -584   1162   1303       C  
ATOM   1849  N   LEU C  42      32.937 -16.127  -3.160  1.00 46.27           N  
ANISOU 1849  N   LEU C  42     6200   4585   6796   -208    864    739       N  
ATOM   1850  CA  LEU C  42      33.182 -14.846  -3.802  1.00 40.85           C  
ANISOU 1850  CA  LEU C  42     5452   4016   6052   -135    782    571       C  
ATOM   1851  C   LEU C  42      32.915 -14.949  -5.297  1.00 39.68           C  
ANISOU 1851  C   LEU C  42     5188   3793   6095   -155    609    455       C  
ATOM   1852  O   LEU C  42      33.253 -15.951  -5.932  1.00 43.21           O  
ANISOU 1852  O   LEU C  42     5675   4124   6621   -174    492    444       O  
ATOM   1853  CB  LEU C  42      34.621 -14.378  -3.566  1.00 37.66           C  
ANISOU 1853  CB  LEU C  42     5195   3719   5395    -24    691    534       C  
ATOM   1854  CG  LEU C  42      34.840 -13.361  -2.445  1.00 39.09           C  
ANISOU 1854  CG  LEU C  42     5443   4061   5349      8    815    524       C  
ATOM   1855  CD1 LEU C  42      34.035 -13.737  -1.214  1.00 44.85           C  
ANISOU 1855  CD1 LEU C  42     6201   4811   6029    -66   1037    656       C  
ATOM   1856  CD2 LEU C  42      36.316 -13.242  -2.097  1.00 31.25           C  
ANISOU 1856  CD2 LEU C  42     4593   3159   4120     89    697    521       C  
ATOM   1857  N   LYS C  43      32.306 -13.909  -5.854  1.00 38.22           N  
ANISOU 1857  N   LYS C  43     4863   3674   5985   -150    590    367       N  
ATOM   1858  CA  LYS C  43      32.163 -13.773  -7.295  1.00 38.81           C  
ANISOU 1858  CA  LYS C  43     4847   3733   6166   -162    397    265       C  
ATOM   1859  C   LYS C  43      32.689 -12.402  -7.707  1.00 31.10           C  
ANISOU 1859  C   LYS C  43     3872   2874   5071    -74    331    193       C  
ATOM   1860  O   LYS C  43      32.359 -11.389  -7.080  1.00 34.23           O  
ANISOU 1860  O   LYS C  43     4220   3324   5461    -37    447    198       O  
ATOM   1861  CB  LYS C  43      30.696 -13.981  -7.724  1.00 48.04           C  
ANISOU 1861  CB  LYS C  43     5807   4841   7606   -267    396    273       C  
ATOM   1862  CG  LYS C  43      30.160 -12.959  -8.714  1.00 59.06           C  
ANISOU 1862  CG  LYS C  43     7046   6305   9087   -249    265    209       C  
ATOM   1863  CD  LYS C  43      28.645 -13.087  -8.875  1.00 65.41           C  
ANISOU 1863  CD  LYS C  43     7603   7067  10183   -343    280    239       C  
ATOM   1864  CE  LYS C  43      28.075 -11.939  -9.691  1.00 66.24           C  
ANISOU 1864  CE  LYS C  43     7536   7242  10389   -297    150    218       C  
ATOM   1865  NZ  LYS C  43      28.246 -12.159 -11.163  1.00 62.37           N  
ANISOU 1865  NZ  LYS C  43     7050   6782   9864   -339   -135    157       N  
ATOM   1866  N   TRP C  44      33.543 -12.388  -8.725  1.00 31.88           N  
ANISOU 1866  N   TRP C  44     4031   3004   5077    -44    165    122       N  
ATOM   1867  CA  TRP C  44      34.218 -11.187  -9.188  1.00 25.45           C  
ANISOU 1867  CA  TRP C  44     3238   2290   4143     23     98     77       C  
ATOM   1868  C   TRP C  44      33.657 -10.754 -10.534  1.00 25.54           C  
ANISOU 1868  C   TRP C  44     3139   2325   4239    -10    -59     50       C  
ATOM   1869  O   TRP C  44      33.382 -11.588 -11.401  1.00 29.37           O  
ANISOU 1869  O   TRP C  44     3603   2786   4772    -74   -175     11       O  
ATOM   1870  CB  TRP C  44      35.723 -11.424  -9.317  1.00 31.09           C  
ANISOU 1870  CB  TRP C  44     4096   3051   4664     77     45     35       C  
ATOM   1871  CG  TRP C  44      36.392 -11.849  -8.046  1.00 26.44           C  
ANISOU 1871  CG  TRP C  44     3615   2458   3972    116    148     83       C  
ATOM   1872  CD1 TRP C  44      36.374 -13.096  -7.479  1.00 34.09           C  
ANISOU 1872  CD1 TRP C  44     4640   3338   4973    101    190    146       C  
ATOM   1873  CD2 TRP C  44      37.190 -11.028  -7.183  1.00 23.58           C  
ANISOU 1873  CD2 TRP C  44     3322   2185   3453    169    203     83       C  
ATOM   1874  NE1 TRP C  44      37.112 -13.098  -6.317  1.00 32.99           N  
ANISOU 1874  NE1 TRP C  44     4604   3247   4685    150    255    211       N  
ATOM   1875  CE2 TRP C  44      37.622 -11.841  -6.115  1.00 35.66           C  
ANISOU 1875  CE2 TRP C  44     4949   3704   4895    187    259    156       C  
ATOM   1876  CE3 TRP C  44      37.573  -9.685  -7.205  1.00 26.40           C  
ANISOU 1876  CE3 TRP C  44     3669   2618   3743    193    199     30       C  
ATOM   1877  CZ2 TRP C  44      38.413 -11.353  -5.082  1.00 32.64           C  
ANISOU 1877  CZ2 TRP C  44     4652   3419   4331    225    294    167       C  
ATOM   1878  CZ3 TRP C  44      38.362  -9.203  -6.176  1.00 35.02           C  
ANISOU 1878  CZ3 TRP C  44     4843   3782   4682    222    248     16       C  
ATOM   1879  CH2 TRP C  44      38.773 -10.036  -5.131  1.00 37.34           C  
ANISOU 1879  CH2 TRP C  44     5230   4096   4860    236    286     78       C  
ATOM   1880  N   GLU C  45      33.490  -9.447 -10.715  1.00 20.11           N  
ANISOU 1880  N   GLU C  45     2389   1682   3569     31    -73     72       N  
ATOM   1881  CA  GLU C  45      33.062  -8.906 -11.995  1.00 28.19           C  
ANISOU 1881  CA  GLU C  45     3323   2746   4642     11   -246     90       C  
ATOM   1882  C   GLU C  45      33.952  -7.743 -12.397  1.00 30.25           C  
ANISOU 1882  C   GLU C  45     3650   3069   4773     62   -288    107       C  
ATOM   1883  O   GLU C  45      34.579  -7.093 -11.559  1.00 26.94           O  
ANISOU 1883  O   GLU C  45     3294   2641   4302    114   -172     96       O  
ATOM   1884  CB  GLU C  45      31.603  -8.427 -11.982  1.00 34.01           C  
ANISOU 1884  CB  GLU C  45     3853   3436   5632      3   -253    153       C  
ATOM   1885  CG  GLU C  45      30.672  -9.186 -11.062  1.00 52.30           C  
ANISOU 1885  CG  GLU C  45     6072   5678   8120    -38   -108    157       C  
ATOM   1886  CD  GLU C  45      29.337  -8.486 -10.904  1.00 58.60           C  
ANISOU 1886  CD  GLU C  45     6634   6440   9190    -19    -70    212       C  
ATOM   1887  OE1 GLU C  45      29.321  -7.277 -10.601  1.00 59.69           O  
ANISOU 1887  OE1 GLU C  45     6735   6565   9378     73     -4    229       O  
ATOM   1888  OE2 GLU C  45      28.298  -9.147 -11.113  1.00 64.86           O  
ANISOU 1888  OE2 GLU C  45     7262   7205  10176    -97   -110    230       O  
ATOM   1889  N   LYS C  46      33.989  -7.488 -13.701  1.00 30.65           N  
ANISOU 1889  N   LYS C  46     3689   3190   4766     32   -460    136       N  
ATOM   1890  CA  LYS C  46      34.628  -6.303 -14.255  1.00 30.43           C  
ANISOU 1890  CA  LYS C  46     3700   3212   4650     58   -512    199       C  
ATOM   1891  C   LYS C  46      33.615  -5.623 -15.159  1.00 30.39           C  
ANISOU 1891  C   LYS C  46     3566   3212   4769     47   -672    318       C  
ATOM   1892  O   LYS C  46      33.081  -6.257 -16.075  1.00 25.91           O  
ANISOU 1892  O   LYS C  46     2958   2712   4176    -18   -829    321       O  
ATOM   1893  CB  LYS C  46      35.902  -6.658 -15.030  1.00 28.59           C  
ANISOU 1893  CB  LYS C  46     3604   3095   4166     26   -557    147       C  
ATOM   1894  CG  LYS C  46      36.511  -5.502 -15.818  1.00 32.23           C  
ANISOU 1894  CG  LYS C  46     4097   3623   4527     18   -616    241       C  
ATOM   1895  CD  LYS C  46      37.801  -5.948 -16.478  1.00 41.63           C  
ANISOU 1895  CD  LYS C  46     5402   4943   5472    -16   -610    170       C  
ATOM   1896  CE  LYS C  46      38.051  -5.236 -17.796  1.00 43.25           C  
ANISOU 1896  CE  LYS C  46     5635   5268   5529    -73   -716    278       C  
ATOM   1897  NZ  LYS C  46      38.156  -3.775 -17.642  1.00 37.73           N  
ANISOU 1897  NZ  LYS C  46     4911   4503   4920    -58   -702    430       N  
ATOM   1898  N   ASP C  47      33.342  -4.347 -14.889  1.00 34.72           N  
ANISOU 1898  N   ASP C  47     4047   3680   5465    111   -644    413       N  
ATOM   1899  CA  ASP C  47      32.363  -3.568 -15.643  1.00 27.28           C  
ANISOU 1899  CA  ASP C  47     2960   2713   4692    130   -804    563       C  
ATOM   1900  C   ASP C  47      31.042  -4.323 -15.762  1.00 35.17           C  
ANISOU 1900  C   ASP C  47     3786   3712   5864    103   -889    560       C  
ATOM   1901  O   ASP C  47      30.473  -4.461 -16.846  1.00 39.80           O  
ANISOU 1901  O   ASP C  47     4301   4381   6442     53  -1113    641       O  
ATOM   1902  CB  ASP C  47      32.906  -3.203 -17.024  1.00 34.34           C  
ANISOU 1902  CB  ASP C  47     3937   3728   5381     77   -990    678       C  
ATOM   1903  CG  ASP C  47      34.166  -2.362 -16.951  1.00 43.90           C  
ANISOU 1903  CG  ASP C  47     5285   4930   6464     86   -900    704       C  
ATOM   1904  OD1 ASP C  47      34.280  -1.527 -16.029  1.00 42.27           O  
ANISOU 1904  OD1 ASP C  47     5062   4580   6420    152   -764    696       O  
ATOM   1905  OD2 ASP C  47      35.049  -2.544 -17.815  1.00 49.76           O  
ANISOU 1905  OD2 ASP C  47     6148   5812   6945     17   -955    718       O  
ATOM   1906  N   GLY C  48      30.571  -4.849 -14.631  1.00 33.12           N  
ANISOU 1906  N   GLY C  48     3461   3374   5749    120   -711    467       N  
ATOM   1907  CA  GLY C  48      29.264  -5.472 -14.556  1.00 43.48           C  
ANISOU 1907  CA  GLY C  48     4572   4663   7287     87   -747    469       C  
ATOM   1908  C   GLY C  48      29.160  -6.880 -15.105  1.00 45.34           C  
ANISOU 1908  C   GLY C  48     4837   4973   7418    -37   -856    391       C  
ATOM   1909  O   GLY C  48      28.141  -7.540 -14.868  1.00 54.49           O  
ANISOU 1909  O   GLY C  48     5831   6094   8777    -90   -852    372       O  
ATOM   1910  N   GLN C  49      30.173  -7.370 -15.829  1.00 38.09           N  
ANISOU 1910  N   GLN C  49     4111   4148   6212    -91   -940    331       N  
ATOM   1911  CA  GLN C  49      30.168  -8.703 -16.418  1.00 42.81           C  
ANISOU 1911  CA  GLN C  49     4760   4796   6711   -205  -1040    217       C  
ATOM   1912  C   GLN C  49      31.140  -9.620 -15.682  1.00 40.78           C  
ANISOU 1912  C   GLN C  49     4675   4488   6333   -205   -860     95       C  
ATOM   1913  O   GLN C  49      32.111  -9.142 -15.089  1.00 38.85           O  
ANISOU 1913  O   GLN C  49     4546   4238   5977   -127   -723    101       O  
ATOM   1914  CB  GLN C  49      30.546  -8.648 -17.903  1.00 47.52           C  
ANISOU 1914  CB  GLN C  49     5442   5548   7066   -265  -1271    216       C  
ATOM   1915  CG  GLN C  49      29.513  -7.968 -18.783  1.00 55.76           C  
ANISOU 1915  CG  GLN C  49     6316   6663   8207   -286  -1516    357       C  
ATOM   1916  CD  GLN C  49      29.975  -7.825 -20.220  1.00 60.75           C  
ANISOU 1916  CD  GLN C  49     7069   7484   8531   -351  -1735    381       C  
ATOM   1917  OE1 GLN C  49      29.167  -7.846 -21.148  1.00 70.72           O  
ANISOU 1917  OE1 GLN C  49     8232   8849   9788   -424  -1993    436       O  
ATOM   1918  NE2 GLN C  49      31.279  -7.674 -20.411  1.00 57.75           N  
ANISOU 1918  NE2 GLN C  49     6896   7166   7881   -333  -1634    343       N  
ATOM   1919  N   PRO C  50      30.911 -10.938 -15.690  1.00 38.24           N  
ANISOU 1919  N   PRO C  50     4364   4115   6051   -291   -867     -9       N  
ATOM   1920  CA  PRO C  50      31.828 -11.841 -14.981  1.00 33.97           C  
ANISOU 1920  CA  PRO C  50     3979   3499   5429   -274   -711    -94       C  
ATOM   1921  C   PRO C  50      33.270 -11.632 -15.420  1.00 37.01           C  
ANISOU 1921  C   PRO C  50     4541   3974   5548   -216   -709   -149       C  
ATOM   1922  O   PRO C  50      33.562 -11.424 -16.600  1.00 36.93           O  
ANISOU 1922  O   PRO C  50     4573   4083   5377   -247   -850   -188       O  
ATOM   1923  CB  PRO C  50      31.310 -13.241 -15.340  1.00 35.03           C  
ANISOU 1923  CB  PRO C  50     4095   3553   5663   -392   -782   -203       C  
ATOM   1924  CG  PRO C  50      30.313 -13.037 -16.450  1.00 40.39           C  
ANISOU 1924  CG  PRO C  50     4632   4315   6399   -485  -1012   -208       C  
ATOM   1925  CD  PRO C  50      29.758 -11.664 -16.245  1.00 35.22           C  
ANISOU 1925  CD  PRO C  50     3836   3716   5832   -411  -1018    -46       C  
ATOM   1926  N   LEU C  51      34.169 -11.647 -14.440  1.00 27.94           N  
ANISOU 1926  N   LEU C  51     3487   2784   4346   -138   -547   -143       N  
ATOM   1927  CA  LEU C  51      35.574 -11.372 -14.691  1.00 30.35           C  
ANISOU 1927  CA  LEU C  51     3921   3173   4439    -78   -524   -184       C  
ATOM   1928  C   LEU C  51      36.166 -12.430 -15.610  1.00 32.35           C  
ANISOU 1928  C   LEU C  51     4261   3450   4583   -111   -587   -333       C  
ATOM   1929  O   LEU C  51      36.024 -13.631 -15.364  1.00 32.27           O  
ANISOU 1929  O   LEU C  51     4272   3318   4670   -133   -564   -410       O  
ATOM   1930  CB  LEU C  51      36.330 -11.331 -13.363  1.00 34.48           C  
ANISOU 1930  CB  LEU C  51     4503   3646   4950      3   -365   -152       C  
ATOM   1931  CG  LEU C  51      37.828 -11.046 -13.403  1.00 30.09           C  
ANISOU 1931  CG  LEU C  51     4042   3172   4218     66   -333   -188       C  
ATOM   1932  CD1 LEU C  51      38.097  -9.669 -13.973  1.00 26.95           C  
ANISOU 1932  CD1 LEU C  51     3625   2882   3734     64   -372   -138       C  
ATOM   1933  CD2 LEU C  51      38.419 -11.191 -12.008  1.00 29.31           C  
ANISOU 1933  CD2 LEU C  51     3990   3027   4119    132   -216   -153       C  
ATOM   1934  N   SER C  52      36.833 -11.982 -16.674  1.00 32.97           N  
ANISOU 1934  N   SER C  52     4390   3675   4464   -118   -653   -376       N  
ATOM   1935  CA  SER C  52      37.461 -12.899 -17.625  1.00 37.19           C  
ANISOU 1935  CA  SER C  52     5011   4256   4863   -145   -685   -554       C  
ATOM   1936  C   SER C  52      38.762 -13.420 -17.032  1.00 37.48           C  
ANISOU 1936  C   SER C  52     5118   4246   4877    -45   -546   -620       C  
ATOM   1937  O   SER C  52      39.779 -12.719 -17.012  1.00 31.00           O  
ANISOU 1937  O   SER C  52     4317   3528   3933     10   -484   -587       O  
ATOM   1938  CB  SER C  52      37.713 -12.215 -18.962  1.00 36.09           C  
ANISOU 1938  CB  SER C  52     4905   4321   4486   -197   -780   -565       C  
ATOM   1939  OG  SER C  52      38.440 -13.082 -19.816  1.00 44.05           O  
ANISOU 1939  OG  SER C  52     6006   5393   5339   -213   -765   -769       O  
ATOM   1940  N   LEU C  53      38.735 -14.668 -16.572  1.00 37.99           N  
ANISOU 1940  N   LEU C  53     5207   4144   5082    -25   -507   -704       N  
ATOM   1941  CA  LEU C  53      39.882 -15.309 -15.931  1.00 41.69           C  
ANISOU 1941  CA  LEU C  53     5724   4536   5580     87   -400   -742       C  
ATOM   1942  C   LEU C  53      40.769 -15.916 -17.011  1.00 44.21           C  
ANISOU 1942  C   LEU C  53     6097   4912   5789    110   -388   -951       C  
ATOM   1943  O   LEU C  53      40.494 -17.003 -17.522  1.00 52.57           O  
ANISOU 1943  O   LEU C  53     7193   5860   6922     77   -414  -1117       O  
ATOM   1944  CB  LEU C  53      39.408 -16.368 -14.943  1.00 45.28           C  
ANISOU 1944  CB  LEU C  53     6185   4764   6256    100   -366   -700       C  
ATOM   1945  CG  LEU C  53      38.370 -15.855 -13.944  1.00 42.21           C  
ANISOU 1945  CG  LEU C  53     5738   4334   5967     56   -348   -518       C  
ATOM   1946  CD1 LEU C  53      37.711 -16.997 -13.182  1.00 34.74           C  
ANISOU 1946  CD1 LEU C  53     4797   3170   5234     24   -309   -472       C  
ATOM   1947  CD2 LEU C  53      39.036 -14.865 -12.996  1.00 33.98           C  
ANISOU 1947  CD2 LEU C  53     4697   3383   4832    138   -275   -389       C  
ATOM   1948  N   GLY C  54      41.842 -15.219 -17.356  1.00 34.21           N  
ANISOU 1948  N   GLY C  54     4829   3813   4357    160   -333   -958       N  
ATOM   1949  CA  GLY C  54      42.766 -15.691 -18.359  1.00 36.66           C  
ANISOU 1949  CA  GLY C  54     5173   4210   4546    189   -277  -1160       C  
ATOM   1950  C   GLY C  54      44.204 -15.523 -17.906  1.00 28.83           C  
ANISOU 1950  C   GLY C  54     4136   3266   3550    315   -163  -1146       C  
ATOM   1951  O   GLY C  54      44.487 -15.375 -16.714  1.00 20.85           O  
ANISOU 1951  O   GLY C  54     3087   2179   2657    389   -149  -1004       O  
ATOM   1952  N   PRO C  55      45.142 -15.557 -18.848  1.00 27.38           N  
ANISOU 1952  N   PRO C  55     3949   3228   3226    335    -78  -1299       N  
ATOM   1953  CA  PRO C  55      46.549 -15.348 -18.487  1.00 23.25           C  
ANISOU 1953  CA  PRO C  55     3341   2773   2721    449     31  -1289       C  
ATOM   1954  C   PRO C  55      46.772 -14.007 -17.806  1.00 35.63           C  
ANISOU 1954  C   PRO C  55     4852   4443   4241    420     12  -1068       C  
ATOM   1955  O   PRO C  55      46.095 -13.016 -18.089  1.00 20.61           O  
ANISOU 1955  O   PRO C  55     2977   2628   2224    308    -44   -955       O  
ATOM   1956  CB  PRO C  55      47.285 -15.429 -19.835  1.00 32.19           C  
ANISOU 1956  CB  PRO C  55     4476   4090   3667    431    144  -1492       C  
ATOM   1957  CG  PRO C  55      46.221 -15.369 -20.886  1.00 34.46           C  
ANISOU 1957  CG  PRO C  55     4871   4453   3768    283     65  -1561       C  
ATOM   1958  CD  PRO C  55      44.990 -15.952 -20.257  1.00 31.91           C  
ANISOU 1958  CD  PRO C  55     4590   3906   3629    259    -69  -1517       C  
ATOM   1959  N   ASN C  56      47.717 -14.008 -16.864  1.00 21.09           N  
ANISOU 1959  N   ASN C  56     2927   2574   2512    526     46  -1009       N  
ATOM   1960  CA  ASN C  56      48.171 -12.844 -16.114  1.00 26.37           C  
ANISOU 1960  CA  ASN C  56     3531   3329   3159    505     32   -847       C  
ATOM   1961  C   ASN C  56      47.146 -12.337 -15.116  1.00 23.90           C  
ANISOU 1961  C   ASN C  56     3270   2920   2892    460    -59   -688       C  
ATOM   1962  O   ASN C  56      47.328 -11.253 -14.555  1.00 32.90           O  
ANISOU 1962  O   ASN C  56     4380   4119   4003    419    -73   -578       O  
ATOM   1963  CB  ASN C  56      48.606 -11.707 -17.045  1.00 25.22           C  
ANISOU 1963  CB  ASN C  56     3355   3390   2839    401     90   -832       C  
ATOM   1964  CG  ASN C  56      49.830 -12.075 -17.847  1.00 30.87           C  
ANISOU 1964  CG  ASN C  56     3985   4235   3508    448    223   -979       C  
ATOM   1965  OD1 ASN C  56      50.655 -12.875 -17.398  1.00 26.82           O  
ANISOU 1965  OD1 ASN C  56     3385   3666   3138    583    262  -1059       O  
ATOM   1966  ND2 ASN C  56      49.949 -11.517 -19.046  1.00 36.63           N  
ANISOU 1966  ND2 ASN C  56     4735   5144   4040    343    299  -1010       N  
ATOM   1967  N   ILE C  57      46.086 -13.093 -14.860  1.00 21.65           N  
ANISOU 1967  N   ILE C  57     3054   2481   2690    459   -106   -685       N  
ATOM   1968  CA  ILE C  57      45.139 -12.765 -13.803  1.00 21.16           C  
ANISOU 1968  CA  ILE C  57     3024   2327   2690    429   -154   -544       C  
ATOM   1969  C   ILE C  57      45.046 -13.958 -12.863  1.00 23.36           C  
ANISOU 1969  C   ILE C  57     3330   2436   3110    513   -161   -518       C  
ATOM   1970  O   ILE C  57      45.015 -15.108 -13.313  1.00 23.87           O  
ANISOU 1970  O   ILE C  57     3416   2389   3263    552   -155   -618       O  
ATOM   1971  CB  ILE C  57      43.754 -12.402 -14.371  1.00 36.51           C  
ANISOU 1971  CB  ILE C  57     5002   4253   4616    321   -200   -520       C  
ATOM   1972  CG1 ILE C  57      43.882 -11.179 -15.277  1.00 42.09           C  
ANISOU 1972  CG1 ILE C  57     5690   5119   5185    245   -208   -496       C  
ATOM   1973  CG2 ILE C  57      42.766 -12.143 -13.240  1.00 42.52           C  
ANISOU 1973  CG2 ILE C  57     5771   4916   5470    303   -211   -395       C  
ATOM   1974  CD1 ILE C  57      42.623 -10.368 -15.400  1.00 52.74           C  
ANISOU 1974  CD1 ILE C  57     7038   6450   6550    164   -273   -393       C  
ATOM   1975  N   GLU C  58      45.017 -13.690 -11.557  1.00 23.25           N  
ANISOU 1975  N   GLU C  58     3324   2397   3112    536   -172   -385       N  
ATOM   1976  CA  GLU C  58      44.870 -14.766 -10.589  1.00 25.11           C  
ANISOU 1976  CA  GLU C  58     3602   2480   3459    601   -182   -305       C  
ATOM   1977  C   GLU C  58      44.086 -14.278  -9.378  1.00 24.72           C  
ANISOU 1977  C   GLU C  58     3597   2421   3375    551   -172   -159       C  
ATOM   1978  O   GLU C  58      44.181 -13.110  -8.989  1.00 17.46           O  
ANISOU 1978  O   GLU C  58     2664   1622   2350    514   -166   -134       O  
ATOM   1979  CB  GLU C  58      46.232 -15.332 -10.162  1.00 23.05           C  
ANISOU 1979  CB  GLU C  58     3297   2223   3237    736   -206   -295       C  
ATOM   1980  CG  GLU C  58      47.182 -14.340  -9.543  1.00 40.81           C  
ANISOU 1980  CG  GLU C  58     5486   4643   5376    752   -237   -247       C  
ATOM   1981  CD  GLU C  58      48.555 -14.945  -9.267  1.00 47.37           C  
ANISOU 1981  CD  GLU C  58     6229   5491   6279    892   -282   -243       C  
ATOM   1982  OE1 GLU C  58      48.914 -15.949  -9.918  1.00 47.72           O  
ANISOU 1982  OE1 GLU C  58     6240   5434   6458    984   -258   -330       O  
ATOM   1983  OE2 GLU C  58      49.274 -14.419  -8.390  1.00 52.98           O  
ANISOU 1983  OE2 GLU C  58     6894   6313   6923    911   -348   -165       O  
ATOM   1984  N   ILE C  59      43.287 -15.187  -8.812  1.00 27.93           N  
ANISOU 1984  N   ILE C  59     4057   2675   3881    542   -153    -75       N  
ATOM   1985  CA  ILE C  59      42.550 -14.976  -7.568  1.00 26.04           C  
ANISOU 1985  CA  ILE C  59     3867   2425   3604    499   -108     69       C  
ATOM   1986  C   ILE C  59      43.253 -15.742  -6.459  1.00 21.29           C  
ANISOU 1986  C   ILE C  59     3320   1784   2987    585   -136    208       C  
ATOM   1987  O   ILE C  59      43.446 -16.962  -6.562  1.00 22.62           O  
ANISOU 1987  O   ILE C  59     3506   1793   3294    645   -160    244       O  
ATOM   1988  CB  ILE C  59      41.088 -15.447  -7.668  1.00 35.37           C  
ANISOU 1988  CB  ILE C  59     5054   3474   4911    406    -52    100       C  
ATOM   1989  CG1 ILE C  59      40.422 -14.907  -8.929  1.00 36.09           C  
ANISOU 1989  CG1 ILE C  59     5078   3595   5039    332    -73    -27       C  
ATOM   1990  CG2 ILE C  59      40.322 -15.022  -6.419  1.00 36.42           C  
ANISOU 1990  CG2 ILE C  59     5218   3637   4982    354     40    230       C  
ATOM   1991  CD1 ILE C  59      40.350 -13.430  -8.966  1.00 29.06           C  
ANISOU 1991  CD1 ILE C  59     4149   2853   4041    306    -62    -43       C  
ATOM   1992  N   ILE C  60      43.588 -15.039  -5.385  1.00 23.28           N  
ANISOU 1992  N   ILE C  60     3602   2170   3073    586   -141    287       N  
ATOM   1993  CA  ILE C  60      44.371 -15.579  -4.282  1.00 27.02           C  
ANISOU 1993  CA  ILE C  60     4127   2665   3474    664   -206    437       C  
ATOM   1994  C   ILE C  60      43.514 -15.602  -3.025  1.00 21.90           C  
ANISOU 1994  C   ILE C  60     3584   2029   2710    595   -129    595       C  
ATOM   1995  O   ILE C  60      42.779 -14.650  -2.737  1.00 30.81           O  
ANISOU 1995  O   ILE C  60     4724   3247   3737    505    -36    544       O  
ATOM   1996  CB  ILE C  60      45.645 -14.746  -4.047  1.00 32.98           C  
ANISOU 1996  CB  ILE C  60     4828   3610   4094    711   -302    385       C  
ATOM   1997  CG1 ILE C  60      46.446 -14.591  -5.340  1.00 34.01           C  
ANISOU 1997  CG1 ILE C  60     4840   3757   4327    758   -333    224       C  
ATOM   1998  CG2 ILE C  60      46.492 -15.362  -2.951  1.00 37.08           C  
ANISOU 1998  CG2 ILE C  60     5383   4167   4541    799   -414    553       C  
ATOM   1999  CD1 ILE C  60      47.094 -15.841  -5.789  1.00 41.52           C  
ANISOU 1999  CD1 ILE C  60     5748   4577   5450    883   -378    234       C  
ATOM   2000  N   HIS C  61      43.617 -16.688  -2.271  1.00 23.86           N  
ANISOU 2000  N   HIS C  61     3905   2183   2977    639   -157    792       N  
ATOM   2001  CA  HIS C  61      42.992 -16.803  -0.960  1.00 25.42           C  
ANISOU 2001  CA  HIS C  61     4220   2426   3014    574    -81    980       C  
ATOM   2002  C   HIS C  61      44.073 -17.208   0.027  1.00 27.79           C  
ANISOU 2002  C   HIS C  61     4584   2810   3165    664   -224   1160       C  
ATOM   2003  O   HIS C  61      44.789 -18.187  -0.209  1.00 28.52           O  
ANISOU 2003  O   HIS C  61     4651   2769   3418    779   -337   1253       O  
ATOM   2004  CB  HIS C  61      41.852 -17.825  -0.979  1.00 29.48           C  
ANISOU 2004  CB  HIS C  61     4770   2726   3706    508     34   1106       C  
ATOM   2005  CG  HIS C  61      41.189 -18.028   0.347  1.00 32.80           C  
ANISOU 2005  CG  HIS C  61     5308   3195   3959    428    146   1325       C  
ATOM   2006  ND1 HIS C  61      41.137 -17.047   1.316  1.00 37.30           N  
ANISOU 2006  ND1 HIS C  61     5941   4005   4225    379    206   1317       N  
ATOM   2007  CD2 HIS C  61      40.542 -19.100   0.863  1.00 35.63           C  
ANISOU 2007  CD2 HIS C  61     5738   3395   4403    376    226   1555       C  
ATOM   2008  CE1 HIS C  61      40.488 -17.507   2.371  1.00 38.13           C  
ANISOU 2008  CE1 HIS C  61     6158   4125   4205    303    329   1530       C  
ATOM   2009  NE2 HIS C  61      40.122 -18.752   2.124  1.00 39.31           N  
ANISOU 2009  NE2 HIS C  61     6312   4033   4592    297    343   1697       N  
ATOM   2010  N   GLU C  62      44.202 -16.452   1.119  1.00 28.20           N  
ANISOU 2010  N   GLU C  62     4713   3084   2916    615   -227   1200       N  
ATOM   2011  CA  GLU C  62      45.176 -16.722   2.177  1.00 30.51           C  
ANISOU 2011  CA  GLU C  62     5076   3511   3007    679   -392   1381       C  
ATOM   2012  C   GLU C  62      44.487 -16.603   3.535  1.00 32.56           C  
ANISOU 2012  C   GLU C  62     5504   3909   2959    574   -291   1540       C  
ATOM   2013  O   GLU C  62      43.310 -16.243   3.625  1.00 34.32           O  
ANISOU 2013  O   GLU C  62     5764   4124   3153    461    -76   1481       O  
ATOM   2014  CB  GLU C  62      46.372 -15.766   2.076  1.00 38.31           C  
ANISOU 2014  CB  GLU C  62     5972   4695   3890    720   -550   1214       C  
ATOM   2015  CG  GLU C  62      47.084 -15.825   0.742  1.00 45.66           C  
ANISOU 2015  CG  GLU C  62     6731   5524   5095    813   -614   1057       C  
ATOM   2016  CD  GLU C  62      48.359 -15.010   0.715  1.00 54.83           C  
ANISOU 2016  CD  GLU C  62     7779   6876   6179    846   -771    934       C  
ATOM   2017  OE1 GLU C  62      48.548 -14.170   1.619  1.00 58.28           O  
ANISOU 2017  OE1 GLU C  62     8273   7519   6352    769   -821    908       O  
ATOM   2018  OE2 GLU C  62      49.176 -15.221  -0.209  1.00 55.95           O  
ANISOU 2018  OE2 GLU C  62     7769   6962   6528    941   -836    850       O  
ATOM   2019  N   GLY C  63      45.230 -16.893   4.600  1.00 35.21           N  
ANISOU 2019  N   GLY C  63     5932   4390   3055    610   -446   1741       N  
ATOM   2020  CA  GLY C  63      44.662 -16.876   5.939  1.00 39.25           C  
ANISOU 2020  CA  GLY C  63     6629   5065   3218    506   -354   1916       C  
ATOM   2021  C   GLY C  63      44.195 -15.489   6.351  1.00 54.09           C  
ANISOU 2021  C   GLY C  63     8551   7168   4834    383   -211   1661       C  
ATOM   2022  O   GLY C  63      44.423 -14.485   5.674  1.00 53.83           O  
ANISOU 2022  O   GLY C  63     8406   7163   4882    381   -219   1373       O  
ATOM   2023  N   LEU C  64      43.515 -15.444   7.502  1.00 59.52           N  
ANISOU 2023  N   LEU C  64     9407   8007   5202    276    -63   1776       N  
ATOM   2024  CA  LEU C  64      42.984 -14.196   8.061  1.00 60.64           C  
ANISOU 2024  CA  LEU C  64     9611   8356   5075    160    111   1528       C  
ATOM   2025  C   LEU C  64      41.961 -13.554   7.124  1.00 59.26           C  
ANISOU 2025  C   LEU C  64     9305   8024   5187    125    342   1280       C  
ATOM   2026  O   LEU C  64      41.897 -12.329   7.001  1.00 61.14           O  
ANISOU 2026  O   LEU C  64     9504   8344   5385     91    401    989       O  
ATOM   2027  CB  LEU C  64      44.102 -13.198   8.384  1.00 60.99           C  
ANISOU 2027  CB  LEU C  64     9657   8626   4891    165    -98   1325       C  
ATOM   2028  CG  LEU C  64      45.136 -13.512   9.465  1.00 61.20           C  
ANISOU 2028  CG  LEU C  64     9719   8898   4637    162   -350   1489       C  
ATOM   2029  CD1 LEU C  64      46.434 -12.763   9.190  1.00 57.39           C  
ANISOU 2029  CD1 LEU C  64     9133   8523   4151    206   -617   1296       C  
ATOM   2030  CD2 LEU C  64      44.592 -13.154  10.835  1.00 58.68           C  
ANISOU 2030  CD2 LEU C  64     9502   8856   3940     45   -198   1473       C  
ATOM   2031  N   ASP C  65      41.168 -14.389   6.444  1.00 52.92           N  
ANISOU 2031  N   ASP C  65     8429   6982   4695    133    455   1400       N  
ATOM   2032  CA  ASP C  65      40.074 -13.946   5.576  1.00 48.91           C  
ANISOU 2032  CA  ASP C  65     7786   6327   4470     95    655   1218       C  
ATOM   2033  C   ASP C  65      40.560 -13.133   4.379  1.00 40.35           C  
ANISOU 2033  C   ASP C  65     6550   5176   3604    158    536    961       C  
ATOM   2034  O   ASP C  65      39.796 -12.356   3.799  1.00 33.16           O  
ANISOU 2034  O   ASP C  65     5539   4209   2850    128    670    772       O  
ATOM   2035  CB  ASP C  65      39.035 -13.135   6.360  1.00 58.07           C  
ANISOU 2035  CB  ASP C  65     8996   7625   5445     -9    939   1099       C  
ATOM   2036  CG  ASP C  65      38.536 -13.860   7.591  1.00 70.38           C  
ANISOU 2036  CG  ASP C  65    10715   9292   6734    -94   1096   1355       C  
ATOM   2037  OD1 ASP C  65      38.428 -15.105   7.543  1.00 71.36           O  
ANISOU 2037  OD1 ASP C  65    10860   9275   6979    -93   1066   1643       O  
ATOM   2038  OD2 ASP C  65      38.252 -13.183   8.605  1.00 77.71           O  
ANISOU 2038  OD2 ASP C  65    11755  10443   7330   -167   1259   1265       O  
ATOM   2039  N   TYR C  66      41.813 -13.310   3.982  1.00 33.43           N  
ANISOU 2039  N   TYR C  66     5645   4303   2756    247    289    969       N  
ATOM   2040  CA  TYR C  66      42.427 -12.487   2.952  1.00 27.54           C  
ANISOU 2040  CA  TYR C  66     4768   3533   2162    290    182    744       C  
ATOM   2041  C   TYR C  66      42.122 -13.036   1.559  1.00 25.54           C  
ANISOU 2041  C   TYR C  66     4385   3058   2259    334    177    730       C  
ATOM   2042  O   TYR C  66      42.312 -14.227   1.300  1.00 26.49           O  
ANISOU 2042  O   TYR C  66     4504   3048   2511    389    109    889       O  
ATOM   2043  CB  TYR C  66      43.936 -12.426   3.192  1.00 35.21           C  
ANISOU 2043  CB  TYR C  66     5742   4634   3004    354    -65    753       C  
ATOM   2044  CG  TYR C  66      44.726 -11.735   2.107  1.00 42.54           C  
ANISOU 2044  CG  TYR C  66     6523   5539   4102    393   -176    562       C  
ATOM   2045  CD1 TYR C  66      45.250 -12.457   1.037  1.00 42.28           C  
ANISOU 2045  CD1 TYR C  66     6377   5370   4316    486   -271    598       C  
ATOM   2046  CD2 TYR C  66      44.971 -10.371   2.161  1.00 45.97           C  
ANISOU 2046  CD2 TYR C  66     6935   6082   4450    331   -172    342       C  
ATOM   2047  CE1 TYR C  66      45.978 -11.841   0.047  1.00 43.90           C  
ANISOU 2047  CE1 TYR C  66     6452   5579   4650    509   -343    437       C  
ATOM   2048  CE2 TYR C  66      45.704  -9.746   1.173  1.00 48.19           C  
ANISOU 2048  CE2 TYR C  66     7083   6339   4889    349   -260    201       C  
ATOM   2049  CZ  TYR C  66      46.204 -10.488   0.120  1.00 46.58           C  
ANISOU 2049  CZ  TYR C  66     6768   6031   4900    435   -339    257       C  
ATOM   2050  OH  TYR C  66      46.933  -9.876  -0.869  1.00 53.46           O  
ANISOU 2050  OH  TYR C  66     7509   6902   5902    440   -397    128       O  
ATOM   2051  N   TYR C  67      41.667 -12.164   0.661  1.00 23.90           N  
ANISOU 2051  N   TYR C  67     4075   2805   2201    310    240    538       N  
ATOM   2052  CA  TYR C  67      41.477 -12.500  -0.746  1.00 28.72           C  
ANISOU 2052  CA  TYR C  67     4568   3254   3090    339    207    490       C  
ATOM   2053  C   TYR C  67      42.106 -11.416  -1.604  1.00 29.34           C  
ANISOU 2053  C   TYR C  67     4559   3382   3207    353    130    306       C  
ATOM   2054  O   TYR C  67      42.061 -10.233  -1.256  1.00 29.19           O  
ANISOU 2054  O   TYR C  67     4546   3453   3093    311    175    189       O  
ATOM   2055  CB  TYR C  67      40.000 -12.633  -1.123  1.00 21.87           C  
ANISOU 2055  CB  TYR C  67     3648   2265   2396    273    366    490       C  
ATOM   2056  CG  TYR C  67      39.292 -13.815  -0.505  1.00 35.47           C  
ANISOU 2056  CG  TYR C  67     5429   3898   4151    235    459    684       C  
ATOM   2057  CD1 TYR C  67      38.666 -13.700   0.726  1.00 32.75           C  
ANISOU 2057  CD1 TYR C  67     5166   3642   3633    171    621    771       C  
ATOM   2058  CD2 TYR C  67      39.221 -15.032  -1.163  1.00 31.65           C  
ANISOU 2058  CD2 TYR C  67     4920   3232   3874    251    401    771       C  
ATOM   2059  CE1 TYR C  67      38.006 -14.763   1.295  1.00 34.77           C  
ANISOU 2059  CE1 TYR C  67     5474   3817   3918    117    726    977       C  
ATOM   2060  CE2 TYR C  67      38.555 -16.103  -0.599  1.00 33.89           C  
ANISOU 2060  CE2 TYR C  67     5254   3401   4220    198    491    963       C  
ATOM   2061  CZ  TYR C  67      37.950 -15.961   0.631  1.00 38.80           C  
ANISOU 2061  CZ  TYR C  67     5954   4123   4667    127    655   1083       C  
ATOM   2062  OH  TYR C  67      37.289 -17.022   1.205  1.00 44.40           O  
ANISOU 2062  OH  TYR C  67     6715   4721   5435     56    763   1304       O  
ATOM   2063  N   ALA C  68      42.688 -11.813  -2.730  1.00 26.53           N  
ANISOU 2063  N   ALA C  68     4126   2959   2995    404     29    275       N  
ATOM   2064  CA  ALA C  68      43.354 -10.845  -3.588  1.00 28.98           C  
ANISOU 2064  CA  ALA C  68     4354   3325   3332    405    -32    133       C  
ATOM   2065  C   ALA C  68      43.095 -11.152  -5.053  1.00 28.99           C  
ANISOU 2065  C   ALA C  68     4276   3228   3511    412    -43     83       C  
ATOM   2066  O   ALA C  68      43.036 -12.315  -5.462  1.00 27.50           O  
ANISOU 2066  O   ALA C  68     4088   2940   3422    451    -65    129       O  
ATOM   2067  CB  ALA C  68      44.868 -10.805  -3.329  1.00 18.38           C  
ANISOU 2067  CB  ALA C  68     2992   2096   1895    458   -168    125       C  
ATOM   2068  N   LEU C  69      42.939 -10.090  -5.829  1.00 28.95           N  
ANISOU 2068  N   LEU C  69     4214   3247   3540    369    -33    -12       N  
ATOM   2069  CA  LEU C  69      42.890 -10.147  -7.282  1.00 28.48           C  
ANISOU 2069  CA  LEU C  69     4088   3153   3580    363    -65    -65       C  
ATOM   2070  C   LEU C  69      44.198  -9.544  -7.780  1.00 27.77           C  
ANISOU 2070  C   LEU C  69     3950   3167   3434    375   -125   -128       C  
ATOM   2071  O   LEU C  69      44.486  -8.370  -7.522  1.00 24.47           O  
ANISOU 2071  O   LEU C  69     3519   2809   2969    331   -121   -160       O  
ATOM   2072  CB  LEU C  69      41.674  -9.390  -7.805  1.00 29.02           C  
ANISOU 2072  CB  LEU C  69     4120   3175   3731    300    -19    -79       C  
ATOM   2073  CG  LEU C  69      41.575  -9.046  -9.291  1.00 28.58           C  
ANISOU 2073  CG  LEU C  69     4007   3128   3724    271    -73   -118       C  
ATOM   2074  CD1 LEU C  69      41.625 -10.302 -10.110  1.00 28.29           C  
ANISOU 2074  CD1 LEU C  69     3972   3056   3720    287   -116   -145       C  
ATOM   2075  CD2 LEU C  69      40.271  -8.307  -9.534  1.00 33.33           C  
ANISOU 2075  CD2 LEU C  69     4560   3676   4428    226    -48    -91       C  
ATOM   2076  N   HIS C  70      45.006 -10.353  -8.451  1.00 20.57           N  
ANISOU 2076  N   HIS C  70     3003   2267   2545    430   -167   -155       N  
ATOM   2077  CA  HIS C  70      46.318  -9.930  -8.911  1.00 24.67           C  
ANISOU 2077  CA  HIS C  70     3448   2898   3029    444   -200   -211       C  
ATOM   2078  C   HIS C  70      46.340  -9.937 -10.432  1.00 21.90           C  
ANISOU 2078  C   HIS C  70     3057   2566   2699    419   -177   -278       C  
ATOM   2079  O   HIS C  70      45.901 -10.905 -11.059  1.00 22.28           O  
ANISOU 2079  O   HIS C  70     3127   2544   2794    446   -170   -311       O  
ATOM   2080  CB  HIS C  70      47.413 -10.841  -8.355  1.00 21.98           C  
ANISOU 2080  CB  HIS C  70     3073   2580   2698    547   -256   -193       C  
ATOM   2081  CG  HIS C  70      48.797 -10.342  -8.622  1.00 33.31           C  
ANISOU 2081  CG  HIS C  70     4392   4147   4118    557   -288   -246       C  
ATOM   2082  ND1 HIS C  70      49.532 -10.738  -9.719  1.00 38.66           N  
ANISOU 2082  ND1 HIS C  70     4978   4860   4850    599   -255   -323       N  
ATOM   2083  CD2 HIS C  70      49.573  -9.460  -7.947  1.00 39.21           C  
ANISOU 2083  CD2 HIS C  70     5087   5002   4808    517   -339   -248       C  
ATOM   2084  CE1 HIS C  70      50.706 -10.130  -9.704  1.00 37.75           C  
ANISOU 2084  CE1 HIS C  70     4742   4874   4728    587   -274   -351       C  
ATOM   2085  NE2 HIS C  70      50.757  -9.350  -8.639  1.00 39.17           N  
ANISOU 2085  NE2 HIS C  70     4941   5094   4848    531   -340   -306       N  
ATOM   2086  N   ILE C  71      46.834  -8.855 -11.021  1.00 20.15           N  
ANISOU 2086  N   ILE C  71     2785   2438   2432    354   -165   -298       N  
ATOM   2087  CA  ILE C  71      46.969  -8.756 -12.470  1.00 23.86           C  
ANISOU 2087  CA  ILE C  71     3229   2970   2867    315   -135   -341       C  
ATOM   2088  C   ILE C  71      48.402  -8.362 -12.782  1.00 27.89           C  
ANISOU 2088  C   ILE C  71     3640   3611   3346    308   -105   -378       C  
ATOM   2089  O   ILE C  71      48.888  -7.338 -12.288  1.00 33.55           O  
ANISOU 2089  O   ILE C  71     4316   4368   4064    252   -115   -344       O  
ATOM   2090  CB  ILE C  71      45.990  -7.741 -13.079  1.00 30.82           C  
ANISOU 2090  CB  ILE C  71     4143   3836   3730    218   -141   -281       C  
ATOM   2091  CG1 ILE C  71      44.597  -7.918 -12.483  1.00 27.83           C  
ANISOU 2091  CG1 ILE C  71     3816   3332   3424    223   -164   -237       C  
ATOM   2092  CG2 ILE C  71      45.945  -7.897 -14.596  1.00 35.72           C  
ANISOU 2092  CG2 ILE C  71     4768   4536   4268    176   -132   -309       C  
ATOM   2093  CD1 ILE C  71      43.594  -6.932 -13.006  1.00 36.77           C  
ANISOU 2093  CD1 ILE C  71     4949   4434   4587    155   -185   -166       C  
ATOM   2094  N   ARG C  72      49.084  -9.170 -13.583  1.00 23.19           N  
ANISOU 2094  N   ARG C  72     2995   3075   2739    361    -58   -463       N  
ATOM   2095  CA  ARG C  72      50.429  -8.820 -14.003  1.00 31.15           C  
ANISOU 2095  CA  ARG C  72     3878   4225   3733    350      2   -503       C  
ATOM   2096  C   ARG C  72      50.410  -8.388 -15.463  1.00 23.65           C  
ANISOU 2096  C   ARG C  72     2938   3383   2665    257     88   -523       C  
ATOM   2097  O   ARG C  72      49.462  -8.668 -16.209  1.00 21.98           O  
ANISOU 2097  O   ARG C  72     2827   3145   2380    231     81   -534       O  
ATOM   2098  CB  ARG C  72      51.408  -9.984 -13.777  1.00 32.58           C  
ANISOU 2098  CB  ARG C  72     3961   4414   4003    493     17   -590       C  
ATOM   2099  CG  ARG C  72      51.171 -11.188 -14.637  1.00 34.76           C  
ANISOU 2099  CG  ARG C  72     4276   4643   4289    570     76   -708       C  
ATOM   2100  CD  ARG C  72      52.133 -12.348 -14.314  1.00 35.34           C  
ANISOU 2100  CD  ARG C  72     4241   4674   4513    740     90   -788       C  
ATOM   2101  NE  ARG C  72      53.541 -12.027 -14.542  1.00 34.26           N  
ANISOU 2101  NE  ARG C  72     3913   4693   4413    766    160   -833       N  
ATOM   2102  CZ  ARG C  72      54.134 -12.065 -15.731  1.00 41.37           C  
ANISOU 2102  CZ  ARG C  72     4738   5718   5263    752    314   -961       C  
ATOM   2103  NH1 ARG C  72      53.442 -12.395 -16.817  1.00 34.77           N  
ANISOU 2103  NH1 ARG C  72     4025   4881   4305    708    393  -1063       N  
ATOM   2104  NH2 ARG C  72      55.418 -11.752 -15.841  1.00 53.21           N  
ANISOU 2104  NH2 ARG C  72     6032   7362   6822    769    391   -990       N  
ATOM   2105  N   ASP C  73      51.457  -7.664 -15.851  1.00 26.94           N  
ANISOU 2105  N   ASP C  73     3245   3933   3057    192    162   -513       N  
ATOM   2106  CA  ASP C  73      51.633  -7.223 -17.233  1.00 35.74           C  
ANISOU 2106  CA  ASP C  73     4365   5187   4029     91    268   -506       C  
ATOM   2107  C   ASP C  73      50.359  -6.571 -17.764  1.00 25.12           C  
ANISOU 2107  C   ASP C  73     3162   3796   2586     -6    207   -392       C  
ATOM   2108  O   ASP C  73      49.835  -6.941 -18.817  1.00 24.81           O  
ANISOU 2108  O   ASP C  73     3204   3819   2403    -32    224   -421       O  
ATOM   2109  CB  ASP C  73      52.062  -8.387 -18.125  1.00 45.48           C  
ANISOU 2109  CB  ASP C  73     5575   6508   5197    170    377   -672       C  
ATOM   2110  CG  ASP C  73      53.371  -9.001 -17.685  1.00 67.36           C  
ANISOU 2110  CG  ASP C  73     8169   9321   8106    286    443   -775       C  
ATOM   2111  OD1 ASP C  73      53.786  -8.755 -16.530  1.00 74.67           O  
ANISOU 2111  OD1 ASP C  73     9009  10191   9171    322    356   -716       O  
ATOM   2112  OD2 ASP C  73      53.990  -9.724 -18.496  1.00 74.81           O  
ANISOU 2112  OD2 ASP C  73     9049  10358   9017    344    580   -923       O  
ATOM   2113  N   THR C  74      49.850  -5.603 -17.005  1.00 19.63           N  
ANISOU 2113  N   THR C  74     2492   2990   1976    -54    126   -272       N  
ATOM   2114  CA  THR C  74      48.560  -5.012 -17.323  1.00 26.34           C  
ANISOU 2114  CA  THR C  74     3448   3759   2801   -111     49   -155       C  
ATOM   2115  C   THR C  74      48.583  -4.385 -18.707  1.00 25.90           C  
ANISOU 2115  C   THR C  74     3425   3830   2586   -226     89    -52       C  
ATOM   2116  O   THR C  74      49.606  -3.874 -19.169  1.00 28.86           O  
ANISOU 2116  O   THR C  74     3736   4323   2908   -303    191    -19       O  
ATOM   2117  CB  THR C  74      48.179  -3.946 -16.296  1.00 24.26           C  
ANISOU 2117  CB  THR C  74     3185   3350   2683   -140     -9    -65       C  
ATOM   2118  OG1 THR C  74      49.219  -2.961 -16.230  1.00 32.52           O  
ANISOU 2118  OG1 THR C  74     4154   4436   3766   -230     46    -21       O  
ATOM   2119  CG2 THR C  74      47.963  -4.572 -14.929  1.00 22.48           C  
ANISOU 2119  CG2 THR C  74     2961   3023   2557    -39    -51   -149       C  
ATOM   2120  N   LEU C  75      47.435  -4.430 -19.359  1.00 31.17           N  
ANISOU 2120  N   LEU C  75     4186   4483   3175   -246      3     12       N  
ATOM   2121  CA  LEU C  75      47.174  -3.827 -20.651  1.00 26.97           C  
ANISOU 2121  CA  LEU C  75     3715   4069   2464   -355    -10    154       C  
ATOM   2122  C   LEU C  75      46.092  -2.767 -20.488  1.00 24.33           C  
ANISOU 2122  C   LEU C  75     3412   3586   2245   -388   -138    356       C  
ATOM   2123  O   LEU C  75      45.410  -2.724 -19.458  1.00 30.41           O  
ANISOU 2123  O   LEU C  75     4164   4179   3212   -315   -200    337       O  
ATOM   2124  CB  LEU C  75      46.727  -4.901 -21.653  1.00 32.57           C  
ANISOU 2124  CB  LEU C  75     4500   4909   2966   -348    -35     39       C  
ATOM   2125  CG  LEU C  75      47.770  -5.985 -21.928  1.00 38.77           C  
ANISOU 2125  CG  LEU C  75     5252   5822   3657   -300    111   -188       C  
ATOM   2126  CD1 LEU C  75      47.217  -7.049 -22.858  1.00 35.87           C  
ANISOU 2126  CD1 LEU C  75     4977   5549   3104   -297     79   -344       C  
ATOM   2127  CD2 LEU C  75      49.017  -5.356 -22.518  1.00 44.03           C  
ANISOU 2127  CD2 LEU C  75     5860   6663   4207   -385    276   -137       C  
ATOM   2128  N   PRO C  76      45.917  -1.883 -21.473  1.00 29.28           N  
ANISOU 2128  N   PRO C  76     4085   4280   2763   -491   -171    563       N  
ATOM   2129  CA  PRO C  76      44.838  -0.884 -21.366  1.00 33.04           C  
ANISOU 2129  CA  PRO C  76     4574   4588   3390   -497   -307    770       C  
ATOM   2130  C   PRO C  76      43.458  -1.489 -21.181  1.00 38.10           C  
ANISOU 2130  C   PRO C  76     5223   5153   4102   -413   -453    729       C  
ATOM   2131  O   PRO C  76      42.614  -0.870 -20.521  1.00 37.81           O  
ANISOU 2131  O   PRO C  76     5146   4922   4298   -363   -525    811       O  
ATOM   2132  CB  PRO C  76      44.942  -0.119 -22.692  1.00 38.76           C  
ANISOU 2132  CB  PRO C  76     5361   5445   3921   -621   -331   1013       C  
ATOM   2133  CG  PRO C  76      46.376  -0.245 -23.074  1.00 39.39           C  
ANISOU 2133  CG  PRO C  76     5426   5702   3837   -701   -143    947       C  
ATOM   2134  CD  PRO C  76      46.802  -1.617 -22.624  1.00 34.42           C  
ANISOU 2134  CD  PRO C  76     4761   5144   3173   -607    -67    641       C  
ATOM   2135  N   GLU C  77      43.202  -2.680 -21.737  1.00 32.78           N  
ANISOU 2135  N   GLU C  77     4587   4617   3252   -402   -488    588       N  
ATOM   2136  CA  GLU C  77      41.902  -3.329 -21.578  1.00 32.44           C  
ANISOU 2136  CA  GLU C  77     4530   4502   3294   -347   -628    538       C  
ATOM   2137  C   GLU C  77      41.587  -3.660 -20.120  1.00 26.05           C  
ANISOU 2137  C   GLU C  77     3656   3496   2747   -245   -584    424       C  
ATOM   2138  O   GLU C  77      40.421  -3.890 -19.787  1.00 27.21           O  
ANISOU 2138  O   GLU C  77     3759   3542   3038   -205   -678    429       O  
ATOM   2139  CB  GLU C  77      41.846  -4.605 -22.426  1.00 42.42           C  
ANISOU 2139  CB  GLU C  77     5853   5937   4327   -374   -658    365       C  
ATOM   2140  CG  GLU C  77      42.279  -5.873 -21.676  1.00 57.11           C  
ANISOU 2140  CG  GLU C  77     7700   7743   6256   -296   -553    104       C  
ATOM   2141  CD  GLU C  77      42.830  -6.974 -22.587  1.00 69.27           C  
ANISOU 2141  CD  GLU C  77     9308   9454   7558   -325   -499   -102       C  
ATOM   2142  OE1 GLU C  77      43.053  -6.713 -23.791  1.00 73.86           O  
ANISOU 2142  OE1 GLU C  77     9956  10238   7870   -417   -509    -58       O  
ATOM   2143  OE2 GLU C  77      43.047  -8.104 -22.092  1.00 68.50           O  
ANISOU 2143  OE2 GLU C  77     9202   9284   7543   -254   -438   -308       O  
ATOM   2144  N   ASP C  78      42.592  -3.685 -19.246  1.00 22.84           N  
ANISOU 2144  N   ASP C  78     3233   3050   2397   -211   -447    328       N  
ATOM   2145  CA  ASP C  78      42.373  -3.999 -17.838  1.00 24.12           C  
ANISOU 2145  CA  ASP C  78     3355   3059   2750   -127   -404    232       C  
ATOM   2146  C   ASP C  78      41.802  -2.831 -17.040  1.00 24.18           C  
ANISOU 2146  C   ASP C  78     3323   2897   2969   -108   -412    337       C  
ATOM   2147  O   ASP C  78      41.345  -3.047 -15.915  1.00 27.68           O  
ANISOU 2147  O   ASP C  78     3741   3226   3552    -44   -377    266       O  
ATOM   2148  CB  ASP C  78      43.683  -4.483 -17.205  1.00 26.37           C  
ANISOU 2148  CB  ASP C  78     3634   3386   3000    -96   -287     97       C  
ATOM   2149  CG  ASP C  78      44.128  -5.837 -17.756  1.00 31.82           C  
ANISOU 2149  CG  ASP C  78     4348   4187   3556    -73   -260    -51       C  
ATOM   2150  OD1 ASP C  78      43.246  -6.661 -18.078  1.00 35.31           O  
ANISOU 2150  OD1 ASP C  78     4817   4609   3989    -61   -328   -103       O  
ATOM   2151  OD2 ASP C  78      45.348  -6.076 -17.877  1.00 26.07           O  
ANISOU 2151  OD2 ASP C  78     3597   3555   2752    -66   -168   -128       O  
ATOM   2152  N   THR C  79      41.820  -1.613 -17.587  1.00 26.16           N  
ANISOU 2152  N   THR C  79     3570   3119   3249   -161   -444    504       N  
ATOM   2153  CA  THR C  79      41.144  -0.486 -16.955  1.00 24.44           C  
ANISOU 2153  CA  THR C  79     3310   2704   3272   -130   -456    596       C  
ATOM   2154  C   THR C  79      39.657  -0.782 -16.797  1.00 25.28           C  
ANISOU 2154  C   THR C  79     3357   2726   3520    -61   -538    614       C  
ATOM   2155  O   THR C  79      39.029  -1.354 -17.689  1.00 23.99           O  
ANISOU 2155  O   THR C  79     3186   2659   3269    -77   -654    664       O  
ATOM   2156  CB  THR C  79      41.334   0.786 -17.797  1.00 27.10           C  
ANISOU 2156  CB  THR C  79     3659   3006   3633   -201   -500    812       C  
ATOM   2157  OG1 THR C  79      42.712   1.169 -17.794  1.00 22.79           O  
ANISOU 2157  OG1 THR C  79     3140   2514   3006   -281   -399    793       O  
ATOM   2158  CG2 THR C  79      40.485   1.948 -17.268  1.00 32.39           C  
ANISOU 2158  CG2 THR C  79     4275   3429   4602   -148   -525    911       C  
ATOM   2159  N   GLY C  80      39.091  -0.388 -15.664  1.00 24.96           N  
ANISOU 2159  N   GLY C  80     3266   2519   3698      7   -474    561       N  
ATOM   2160  CA  GLY C  80      37.666  -0.517 -15.451  1.00 25.12           C  
ANISOU 2160  CA  GLY C  80     3192   2449   3902     73   -522    586       C  
ATOM   2161  C   GLY C  80      37.348  -0.707 -13.982  1.00 26.23           C  
ANISOU 2161  C   GLY C  80     3306   2488   4172    137   -379    434       C  
ATOM   2162  O   GLY C  80      38.214  -0.598 -13.117  1.00 21.98           O  
ANISOU 2162  O   GLY C  80     2832   1941   3577    130   -268    321       O  
ATOM   2163  N   TYR C  81      36.077  -1.007 -13.728  1.00 31.23           N  
ANISOU 2163  N   TYR C  81     3834   3062   4969    188   -387    438       N  
ATOM   2164  CA  TYR C  81      35.550  -1.188 -12.383  1.00 29.25           C  
ANISOU 2164  CA  TYR C  81     3545   2730   4839    243   -230    314       C  
ATOM   2165  C   TYR C  81      35.466  -2.669 -12.058  1.00 31.56           C  
ANISOU 2165  C   TYR C  81     3861   3120   5009    218   -201    233       C  
ATOM   2166  O   TYR C  81      34.842  -3.437 -12.797  1.00 30.28           O  
ANISOU 2166  O   TYR C  81     3642   3010   4852    190   -308    277       O  
ATOM   2167  CB  TYR C  81      34.165  -0.556 -12.247  1.00 29.23           C  
ANISOU 2167  CB  TYR C  81     3379   2589   5137    317   -221    371       C  
ATOM   2168  CG  TYR C  81      34.153   0.927 -12.484  1.00 27.11           C  
ANISOU 2168  CG  TYR C  81     3078   2167   5056    363   -243    459       C  
ATOM   2169  CD1 TYR C  81      34.385   1.823 -11.442  1.00 29.25           C  
ANISOU 2169  CD1 TYR C  81     3376   2292   5444    405    -79    339       C  
ATOM   2170  CD2 TYR C  81      33.915   1.442 -13.753  1.00 29.01           C  
ANISOU 2170  CD2 TYR C  81     3271   2398   5354    357   -435    664       C  
ATOM   2171  CE1 TYR C  81      34.370   3.194 -11.659  1.00 23.97           C  
ANISOU 2171  CE1 TYR C  81     2682   1446   4980    442    -95    409       C  
ATOM   2172  CE2 TYR C  81      33.899   2.805 -13.977  1.00 32.04           C  
ANISOU 2172  CE2 TYR C  81     3628   2605   5940    401   -461    780       C  
ATOM   2173  CZ  TYR C  81      34.130   3.676 -12.924  1.00 30.84           C  
ANISOU 2173  CZ  TYR C  81     3502   2314   5903    434   -279    631       C  
ATOM   2174  OH  TYR C  81      34.110   5.034 -13.141  1.00 34.12           O  
ANISOU 2174  OH  TYR C  81     3901   2599   6463    449   -287    701       O  
ATOM   2175  N   TYR C  82      36.085  -3.056 -10.948  1.00 29.88           N  
ANISOU 2175  N   TYR C  82     3734   2926   4693    221    -69    119       N  
ATOM   2176  CA  TYR C  82      36.116  -4.431 -10.479  1.00 22.70           C  
ANISOU 2176  CA  TYR C  82     2865   2077   3682    204    -27     66       C  
ATOM   2177  C   TYR C  82      35.241  -4.544  -9.243  1.00 25.53           C  
ANISOU 2177  C   TYR C  82     3177   2374   4149    232    135     25       C  
ATOM   2178  O   TYR C  82      35.386  -3.760  -8.301  1.00 29.11           O  
ANISOU 2178  O   TYR C  82     3660   2791   4609    261    258    -42       O  
ATOM   2179  CB  TYR C  82      37.552  -4.865 -10.170  1.00 20.90           C  
ANISOU 2179  CB  TYR C  82     2767   1934   3239    191    -17      6       C  
ATOM   2180  CG  TYR C  82      38.403  -5.017 -11.414  1.00 23.00           C  
ANISOU 2180  CG  TYR C  82     3066   2286   3388    158   -138     30       C  
ATOM   2181  CD1 TYR C  82      38.922  -3.905 -12.068  1.00 26.43           C  
ANISOU 2181  CD1 TYR C  82     3500   2731   3811    136   -184     78       C  
ATOM   2182  CD2 TYR C  82      38.675  -6.266 -11.939  1.00 21.55           C  
ANISOU 2182  CD2 TYR C  82     2913   2164   3112    144   -189      2       C  
ATOM   2183  CE1 TYR C  82      39.683  -4.040 -13.205  1.00 19.47           C  
ANISOU 2183  CE1 TYR C  82     2648   1953   2797     94   -263    107       C  
ATOM   2184  CE2 TYR C  82      39.438  -6.414 -13.081  1.00 21.51           C  
ANISOU 2184  CE2 TYR C  82     2937   2253   2983    115   -267     -5       C  
ATOM   2185  CZ  TYR C  82      39.942  -5.296 -13.706  1.00 21.08           C  
ANISOU 2185  CZ  TYR C  82     2881   2242   2886     87   -296     53       C  
ATOM   2186  OH  TYR C  82      40.706  -5.434 -14.840  1.00 24.72           O  
ANISOU 2186  OH  TYR C  82     3373   2823   3197     46   -343     52       O  
ATOM   2187  N   ARG C  83      34.321  -5.501  -9.255  1.00 30.69           N  
ANISOU 2187  N   ARG C  83     3755   3019   4886    210    145     53       N  
ATOM   2188  CA  ARG C  83      33.381  -5.687  -8.163  1.00 27.32           C  
ANISOU 2188  CA  ARG C  83     3262   2549   4570    219    323     34       C  
ATOM   2189  C   ARG C  83      33.549  -7.088  -7.601  1.00 28.00           C  
ANISOU 2189  C   ARG C  83     3427   2669   4543    171    376     43       C  
ATOM   2190  O   ARG C  83      33.786  -8.043  -8.348  1.00 32.81           O  
ANISOU 2190  O   ARG C  83     4060   3288   5118    131    252     68       O  
ATOM   2191  CB  ARG C  83      31.926  -5.463  -8.626  1.00 30.39           C  
ANISOU 2191  CB  ARG C  83     3436   2871   5239    227    306     88       C  
ATOM   2192  CG  ARG C  83      30.874  -5.817  -7.577  1.00 31.82           C  
ANISOU 2192  CG  ARG C  83     3513   3022   5555    221    516     72       C  
ATOM   2193  CD  ARG C  83      29.455  -5.431  -7.996  1.00 35.80           C  
ANISOU 2193  CD  ARG C  83     3757   3462   6384    245    506    118       C  
ATOM   2194  NE  ARG C  83      29.313  -3.989  -8.174  1.00 48.13           N  
ANISOU 2194  NE  ARG C  83     5243   4949   8094    345    498    107       N  
ATOM   2195  CZ  ARG C  83      29.138  -3.124  -7.178  1.00 49.42           C  
ANISOU 2195  CZ  ARG C  83     5392   5053   8331    418    715     12       C  
ATOM   2196  NH1 ARG C  83      29.090  -3.550  -5.923  1.00 47.77           N  
ANISOU 2196  NH1 ARG C  83     5249   4889   8012    393    959    -73       N  
ATOM   2197  NH2 ARG C  83      29.022  -1.829  -7.437  1.00 45.78           N  
ANISOU 2197  NH2 ARG C  83     4862   4482   8049    512    692      3       N  
ATOM   2198  N   VAL C  84      33.451  -7.207  -6.283  1.00 22.65           N  
ANISOU 2198  N   VAL C  84     2801   2004   3802    174    563     22       N  
ATOM   2199  CA  VAL C  84      33.454  -8.503  -5.624  1.00 32.76           C  
ANISOU 2199  CA  VAL C  84     4152   3296   5000    126    632     77       C  
ATOM   2200  C   VAL C  84      32.196  -8.611  -4.776  1.00 30.88           C  
ANISOU 2200  C   VAL C  84     3807   3032   4892     96    842    103       C  
ATOM   2201  O   VAL C  84      31.808  -7.658  -4.093  1.00 35.29           O  
ANISOU 2201  O   VAL C  84     4328   3607   5475    133    998     37       O  
ATOM   2202  CB  VAL C  84      34.726  -8.734  -4.776  1.00 27.97           C  
ANISOU 2202  CB  VAL C  84     3737   2766   4125    145    646     69       C  
ATOM   2203  CG1 VAL C  84      34.874  -7.675  -3.684  1.00 26.35           C  
ANISOU 2203  CG1 VAL C  84     3587   2622   3802    171    788    -15       C  
ATOM   2204  CG2 VAL C  84      34.718 -10.139  -4.184  1.00 34.75           C  
ANISOU 2204  CG2 VAL C  84     4669   3610   4925    103    691    173       C  
ATOM   2205  N   THR C  85      31.546  -9.767  -4.845  1.00 36.98           N  
ANISOU 2205  N   THR C  85     4523   3757   5770     22    859    187       N  
ATOM   2206  CA  THR C  85      30.357 -10.051  -4.058  1.00 34.31           C  
ANISOU 2206  CA  THR C  85     4068   3401   5566    -33   1078    235       C  
ATOM   2207  C   THR C  85      30.621 -11.275  -3.194  1.00 30.82           C  
ANISOU 2207  C   THR C  85     3766   2961   4984   -102   1174    348       C  
ATOM   2208  O   THR C  85      31.043 -12.319  -3.702  1.00 37.63           O  
ANISOU 2208  O   THR C  85     4691   3754   5851   -140   1032    408       O  
ATOM   2209  CB  THR C  85      29.140 -10.273  -4.962  1.00 36.36           C  
ANISOU 2209  CB  THR C  85     4084   3585   6147    -85   1011    259       C  
ATOM   2210  OG1 THR C  85      28.905  -9.090  -5.737  1.00 33.99           O  
ANISOU 2210  OG1 THR C  85     3658   3284   5973     -7    904    194       O  
ATOM   2211  CG2 THR C  85      27.903 -10.579  -4.135  1.00 40.92           C  
ANISOU 2211  CG2 THR C  85     4504   4150   6895   -152   1260    311       C  
ATOM   2212  N   ALA C  86      30.407 -11.128  -1.888  1.00 29.59           N  
ANISOU 2212  N   ALA C  86     3669   2881   4694   -115   1415    374       N  
ATOM   2213  CA  ALA C  86      30.521 -12.213  -0.926  1.00 30.11           C  
ANISOU 2213  CA  ALA C  86     3867   2959   4613   -190   1535    526       C  
ATOM   2214  C   ALA C  86      29.128 -12.638  -0.483  1.00 38.40           C  
ANISOU 2214  C   ALA C  86     4751   3978   5860   -294   1772    607       C  
ATOM   2215  O   ALA C  86      28.288 -11.789  -0.173  1.00 38.37           O  
ANISOU 2215  O   ALA C  86     4599   4027   5954   -278   1959    520       O  
ATOM   2216  CB  ALA C  86      31.341 -11.785   0.290  1.00 28.71           C  
ANISOU 2216  CB  ALA C  86     3900   2933   4077   -151   1635    516       C  
ATOM   2217  N   THR C  87      28.890 -13.951  -0.440  1.00 39.98           N  
ANISOU 2217  N   THR C  87     4966   4079   6145   -400   1776    773       N  
ATOM   2218  CA  THR C  87      27.573 -14.494  -0.131  1.00 38.34           C  
ANISOU 2218  CA  THR C  87     4577   3821   6170   -531   1989    870       C  
ATOM   2219  C   THR C  87      27.703 -15.752   0.713  1.00 43.92           C  
ANISOU 2219  C   THR C  87     5438   4480   6770   -641   2100   1101       C  
ATOM   2220  O   THR C  87      28.513 -16.628   0.397  1.00 42.01           O  
ANISOU 2220  O   THR C  87     5344   4125   6492   -638   1907   1188       O  
ATOM   2221  CB  THR C  87      26.795 -14.825  -1.414  1.00 41.17           C  
ANISOU 2221  CB  THR C  87     4695   4038   6911   -590   1823    826       C  
ATOM   2222  OG1 THR C  87      26.674 -13.654  -2.227  1.00 44.63           O  
ANISOU 2222  OG1 THR C  87     4995   4520   7443   -484   1697    655       O  
ATOM   2223  CG2 THR C  87      25.405 -15.366  -1.085  1.00 43.37           C  
ANISOU 2223  CG2 THR C  87     4744   4266   7469   -742   2042    923       C  
ATOM   2224  N   ASN C  88      26.908 -15.835   1.775  1.00 48.31           N  
ANISOU 2224  N   ASN C  88     5955   5115   7286   -733   2419   1207       N  
ATOM   2225  CA  ASN C  88      26.677 -17.091   2.481  1.00 49.06           C  
ANISOU 2225  CA  ASN C  88     6136   5167   7337   -855   2485   1429       C  
ATOM   2226  C   ASN C  88      25.174 -17.202   2.735  1.00 51.53           C  
ANISOU 2226  C   ASN C  88     6199   5510   7870   -964   2676   1423       C  
ATOM   2227  O   ASN C  88      24.360 -16.455   2.177  1.00 50.34           O  
ANISOU 2227  O   ASN C  88     5795   5370   7963   -937   2711   1262       O  
ATOM   2228  CB  ASN C  88      27.514 -17.189   3.767  1.00 48.61           C  
ANISOU 2228  CB  ASN C  88     6368   5265   6834   -832   2569   1567       C  
ATOM   2229  CG  ASN C  88      27.145 -16.141   4.809  1.00 50.14           C  
ANISOU 2229  CG  ASN C  88     6568   5713   6772   -808   2834   1461       C  
ATOM   2230  OD1 ASN C  88      26.065 -15.552   4.780  1.00 55.88           O  
ANISOU 2230  OD1 ASN C  88     7068   6484   7681   -824   3005   1329       O  
ATOM   2231  ND2 ASN C  88      28.048 -15.922   5.756  1.00 46.62           N  
ANISOU 2231  ND2 ASN C  88     6377   5437   5898   -765   2846   1506       N  
ATOM   2232  N   THR C  89      24.789 -18.128   3.616  1.00 48.05           N
[truncated: 167,590 more chars]
