# Supplementary material
Source: publisher figshare collection journal article supplement (https://plos.figshare.com/articles/dataset/_/11411415)
Supplement: Supplementary file 1 [file 1 › pone.0226693.s015.pdb]

REMARK Modified from 6HCI (titin M3)
REMARK sequence renumbered: original residue number -4 
SCALE1      0.009429  0.005444  0.000000        0.00000                         
SCALE2      0.000000  0.010887  0.000000        0.00000                         
SCALE3      0.000000  0.000000  0.013248        0.00000 
ATOM      1  N   THR A   4      89.345  -3.551   2.754  1.00 57.97           N  
ANISOU    1  N   THR A   4     6421   5616   9989  -2279   -885  -1008       N  
ATOM      2  CA  THR A   4      89.524  -4.732   1.910  1.00 59.47           C  
ANISOU    2  CA  THR A   4     6475   6014  10107  -2182   -834   -740       C  
ATOM      3  C   THR A   4      89.435  -6.026   2.718  1.00 55.67           C  
ANISOU    3  C   THR A   4     6016   5871   9267  -2064   -933   -836       C  
ATOM      4  O   THR A   4      90.234  -6.259   3.625  1.00 58.60           O  
ANISOU    4  O   THR A   4     6297   6406   9563  -2189  -1119   -971       O  
ATOM      5  CB  THR A   4      90.870  -4.686   1.169  1.00 64.79           C  
ANISOU    5  CB  THR A   4     6923   6788  10907  -2307   -806   -504       C  
ATOM      6  CG2 THR A   4      91.105  -5.970   0.407  1.00 59.79           C  
ANISOU    6  CG2 THR A   4     6149   6418  10151  -2183   -727   -276       C  
ATOM      7  OG1 THR A   4      90.867  -3.588   0.250  1.00 70.36           O  
ANISOU    7  OG1 THR A   4     7659   7244  11830  -2372   -674   -330       O  
ATOM      8  N   LEU A   5      88.460  -6.868   2.375  1.00 57.16           N  
ANISOU    8  N   LEU A   5     6323   6161   9233  -1831   -824   -743       N  
ATOM      9  CA  LEU A   5      88.169  -8.079   3.132  1.00 52.41           C  
ANISOU    9  CA  LEU A   5     5781   5839   8295  -1710   -904   -810       C  
ATOM     10  C   LEU A   5      87.894  -9.237   2.187  1.00 43.29           C  
ANISOU   10  C   LEU A   5     4597   4837   7013  -1503   -782   -557       C  
ATOM     11  O   LEU A   5      87.031  -9.133   1.310  1.00 40.64           O  
ANISOU   11  O   LEU A   5     4353   4393   6697  -1381   -620   -443       O  
ATOM     12  CB  LEU A   5      86.962  -7.879   4.053  1.00 57.52           C  
ANISOU   12  CB  LEU A   5     6653   6435   8767  -1659   -898  -1073       C  
ATOM     13  CG  LEU A   5      87.255  -7.631   5.528  1.00 66.77           C  
ANISOU   13  CG  LEU A   5     7875   7699   9794  -1833  -1079  -1383       C  
ATOM     14  CD1 LEU A   5      85.980  -7.206   6.229  1.00 65.95           C  
ANISOU   14  CD1 LEU A   5     7984   7502   9572  -1791   -990  -1671       C  
ATOM     15  CD2 LEU A   5      87.846  -8.877   6.171  1.00 69.57           C  
ANISOU   15  CD2 LEU A   5     8168   8401   9864  -1832  -1256  -1304       C  
ATOM     16  N   ARG A   6      88.609 -10.340   2.391  1.00 39.05           N  
ANISOU   16  N   ARG A   6     3931   4544   6360  -1465   -876   -478       N  
ATOM     17  CA  ARG A   6      88.389 -11.536   1.595  1.00 34.53           C  
ANISOU   17  CA  ARG A   6     3328   4110   5680  -1270   -767   -290       C  
ATOM     18  C   ARG A   6      86.950 -12.016   1.765  1.00 32.95           C  
ANISOU   18  C   ARG A   6     3354   3915   5251  -1106   -701   -334       C  
ATOM     19  O   ARG A   6      86.348 -11.844   2.830  1.00 38.51           O  
ANISOU   19  O   ARG A   6     4201   4620   5811  -1135   -783   -518       O  
ATOM     20  CB  ARG A   6      89.356 -12.644   2.007  1.00 38.70           C  
ANISOU   20  CB  ARG A   6     3675   4857   6171  -1245   -914   -233       C  
ATOM     21  CG  ARG A   6      89.168 -13.157   3.427  1.00 51.44           C  
ANISOU   21  CG  ARG A   6     5383   6601   7561  -1262  -1137   -353       C  
ATOM     22  CD  ARG A   6      90.361 -14.035   3.828  1.00 68.25           C  
ANISOU   22  CD  ARG A   6     7279   8905   9747  -1273  -1340   -257       C  
ATOM     23  NE  ARG A   6      90.033 -15.090   4.785  1.00 73.41           N  
ANISOU   23  NE  ARG A   6     8022   9713  10157  -1204  -1517   -234       N  
ATOM     24  CZ  ARG A   6      89.175 -16.081   4.561  1.00 74.74           C  
ANISOU   24  CZ  ARG A   6     8310   9913  10176  -1022  -1429   -149       C  
ATOM     25  NH1 ARG A   6      88.530 -16.175   3.400  1.00 71.11           N1+
ANISOU   25  NH1 ARG A   6     7896   9356   9765   -883  -1172   -100       N1+
ATOM     26  NH2 ARG A   6      88.961 -16.987   5.506  1.00 77.47           N  
ANISOU   26  NH2 ARG A   6     8729  10391  10314   -998  -1612   -100       N  
ATOM     27  N   PRO A   7      86.371 -12.617   0.728  1.00 30.00           N  
ANISOU   27  N   PRO A   7     3009   3559   4831   -950   -544   -183       N  
ATOM     28  CA  PRO A   7      84.985 -13.090   0.832  1.00 29.99           C  
ANISOU   28  CA  PRO A   7     3195   3562   4637   -803   -483   -216       C  
ATOM     29  C   PRO A   7      84.893 -14.245   1.817  1.00 36.24           C  
ANISOU   29  C   PRO A   7     4023   4537   5211   -747   -606   -263       C  
ATOM     30  O   PRO A   7      85.743 -15.137   1.825  1.00 36.61           O  
ANISOU   30  O   PRO A   7     3933   4712   5264   -724   -686   -171       O  
ATOM     31  CB  PRO A   7      84.652 -13.537  -0.598  1.00 29.67           C  
ANISOU   31  CB  PRO A   7     3139   3531   4604   -684   -317    -29       C  
ATOM     32  CG  PRO A   7      85.769 -12.967  -1.465  1.00 31.12           C  
ANISOU   32  CG  PRO A   7     3155   3684   4986   -798   -257     90       C  
ATOM     33  CD  PRO A   7      86.962 -12.928  -0.583  1.00 31.58           C  
ANISOU   33  CD  PRO A   7     3064   3802   5133   -917   -408      8       C  
ATOM     34  N   MET A   8      83.857 -14.220   2.656  1.00 28.36           N  
ANISOU   34  N   MET A   8     3195   3544   4038   -732   -618   -400       N  
ATOM     35  CA  MET A   8      83.628 -15.271   3.644  1.00 35.38           C  
ANISOU   35  CA  MET A   8     4148   4610   4683   -710   -730   -417       C  
ATOM     36  C   MET A   8      82.155 -15.641   3.663  1.00 32.41           C  
ANISOU   36  C   MET A   8     3931   4234   4149   -600   -608   -449       C  
ATOM     37  O   MET A   8      81.294 -14.755   3.653  1.00 30.65           O  
ANISOU   37  O   MET A   8     3795   3886   3964   -602   -500   -582       O  
ATOM     38  CB  MET A   8      84.067 -14.819   5.040  1.00 39.17           C  
ANISOU   38  CB  MET A   8     4662   5172   5047   -889   -905   -588       C  
ATOM     39  CG  MET A   8      85.413 -14.124   5.067  1.00 50.47           C  
ANISOU   39  CG  MET A   8     5933   6570   6674  -1034  -1028   -604       C  
ATOM     40  SD  MET A   8      86.018 -13.888   6.743  1.00 61.78           S  
ANISOU   40  SD  MET A   8     7398   8166   7909  -1263  -1294   -783       S  
ATOM     41  CE  MET A   8      86.436 -15.578   7.181  1.00 63.70           C  
ANISOU   41  CE  MET A   8     7578   8648   7976  -1188  -1491   -541       C  
ATOM     42  N   PHE A   9      81.865 -16.941   3.700  1.00 24.88           N  
ANISOU   42  N   PHE A   9     2997   3400   3055   -506   -629   -330       N  
ATOM     43  CA  PHE A   9      80.482 -17.383   3.829  1.00 25.84           C  
ANISOU   43  CA  PHE A   9     3253   3543   3022   -429   -526   -358       C  
ATOM     44  C   PHE A   9      80.006 -17.173   5.259  1.00 28.90           C  
ANISOU   44  C   PHE A   9     3763   4036   3181   -549   -574   -528       C  
ATOM     45  O   PHE A   9      80.656 -17.614   6.212  1.00 31.61           O  
ANISOU   45  O   PHE A   9     4112   4528   3370   -655   -744   -507       O  
ATOM     46  CB  PHE A   9      80.332 -18.850   3.441  1.00 21.07           C  
ANISOU   46  CB  PHE A   9     2633   3012   2360   -315   -537   -182       C  
ATOM     47  CG  PHE A   9      80.465 -19.094   1.977  1.00 25.29           C  
ANISOU   47  CG  PHE A   9     3081   3466   3061   -197   -432    -73       C  
ATOM     48  CD1 PHE A   9      79.444 -18.747   1.104  1.00 30.52           C  
ANISOU   48  CD1 PHE A   9     3797   4047   3751   -125   -284    -81       C  
ATOM     49  CD2 PHE A   9      81.609 -19.681   1.470  1.00 27.57           C  
ANISOU   49  CD2 PHE A   9     3224   3775   3475   -166   -484     31       C  
ATOM     50  CE1 PHE A   9      79.576 -18.966  -0.250  1.00 32.38           C  
ANISOU   50  CE1 PHE A   9     3971   4249   4082    -50   -196     19       C  
ATOM     51  CE2 PHE A   9      81.746 -19.905   0.119  1.00 29.17           C  
ANISOU   51  CE2 PHE A   9     3353   3940   3791    -81   -357     96       C  
ATOM     52  CZ  PHE A   9      80.733 -19.546  -0.743  1.00 22.75           C  
ANISOU   52  CZ  PHE A   9     2623   3072   2948    -36   -217     93       C  
ATOM     53  N   LYS A  10      78.881 -16.487   5.407  1.00 28.42           N  
ANISOU   53  N   LYS A  10     3790   3908   3101   -539   -427   -698       N  
ATOM     54  CA  LYS A  10      78.186 -16.421   6.682  1.00 30.25           C  
ANISOU   54  CA  LYS A  10     4142   4270   3083   -644   -403   -886       C  
ATOM     55  C   LYS A  10      77.160 -17.530   6.806  1.00 24.52           C  
ANISOU   55  C   LYS A  10     3479   3659   2177   -579   -331   -789       C  
ATOM     56  O   LYS A  10      76.791 -17.905   7.921  1.00 25.94           O  
ANISOU   56  O   LYS A  10     3755   4022   2079   -694   -342   -855       O  
ATOM     57  CB  LYS A  10      77.483 -15.070   6.834  1.00 37.10           C  
ANISOU   57  CB  LYS A  10     5040   4988   4070   -663   -253  -1167       C  
ATOM     58  CG  LYS A  10      78.395 -13.864   6.824  1.00 39.76           C  
ANISOU   58  CG  LYS A  10     5326   5176   4606   -756   -317  -1297       C  
ATOM     59  CD  LYS A  10      79.115 -13.714   8.141  1.00 52.91           C  
ANISOU   59  CD  LYS A  10     7046   7013   6043   -967   -459  -1466       C  
ATOM     60  CE  LYS A  10      79.642 -12.298   8.322  1.00 58.86           C  
ANISOU   60  CE  LYS A  10     7774   7587   7001  -1083   -474  -1711       C  
ATOM     61  NZ  LYS A  10      80.202 -12.104   9.688  1.00 61.58           N1+
ANISOU   61  NZ  LYS A  10     8192   8127   7080  -1316   -610  -1933       N1+
ATOM     62  N   ARG A  11      76.688 -18.042   5.673  1.00 22.36           N  
ANISOU   62  N   ARG A  11     3156   3291   2047   -422   -255   -634       N  
ATOM     63  CA  ARG A  11      75.761 -19.162   5.616  1.00 23.47           C  
ANISOU   63  CA  ARG A  11     3337   3511   2070   -361   -199   -523       C  
ATOM     64  C   ARG A  11      76.121 -19.980   4.387  1.00 22.75           C  
ANISOU   64  C   ARG A  11     3169   3344   2130   -232   -234   -309       C  
ATOM     65  O   ARG A  11      76.190 -19.438   3.282  1.00 22.67           O  
ANISOU   65  O   ARG A  11     3095   3203   2315   -147   -177   -295       O  
ATOM     66  CB  ARG A  11      74.311 -18.683   5.536  1.00 26.86           C  
ANISOU   66  CB  ARG A  11     3787   3892   2529   -311     -5   -671       C  
ATOM     67  CG  ARG A  11      73.341 -19.788   5.202  1.00 27.70           C  
ANISOU   67  CG  ARG A  11     3898   4046   2579   -242     56   -542       C  
ATOM     68  CD  ARG A  11      71.921 -19.269   5.107  1.00 34.09           C  
ANISOU   68  CD  ARG A  11     4682   4810   3461   -189    238   -689       C  
ATOM     69  NE  ARG A  11      70.976 -20.365   4.929  1.00 35.65           N  
ANISOU   69  NE  ARG A  11     4876   5078   3591   -160    289   -575       N  
ATOM     70  CZ  ARG A  11      69.658 -20.229   4.997  1.00 37.73           C  
ANISOU   70  CZ  ARG A  11     5096   5351   3889   -133    442   -676       C  
ATOM     71  NH1 ARG A  11      69.127 -19.034   5.239  1.00 34.38           N1+
ANISOU   71  NH1 ARG A  11     4622   4855   3586   -111    565   -905       N1+
ATOM     72  NH2 ARG A  11      68.876 -21.289   4.830  1.00 34.26           N  
ANISOU   72  NH2 ARG A  11     4644   4976   3396   -130    472   -559       N  
ATOM     73  N   LEU A  12      76.378 -21.268   4.578  1.00 19.26           N  
ANISOU   73  N   LEU A  12     2733   2982   1601   -229   -330   -145       N  
ATOM     74  CA  LEU A  12      76.794 -22.147   3.499  1.00 19.14           C  
ANISOU   74  CA  LEU A  12     2640   2895   1736   -112   -355     11       C  
ATOM     75  C   LEU A  12      75.591 -22.816   2.854  1.00 21.07           C  
ANISOU   75  C   LEU A  12     2915   3109   1982    -31   -243     44       C  
ATOM     76  O   LEU A  12      74.509 -22.907   3.440  1.00 22.02           O  
ANISOU   76  O   LEU A  12     3104   3287   1975    -74   -175     -3       O  
ATOM     77  CB  LEU A  12      77.750 -23.227   4.013  1.00 21.43           C  
ANISOU   77  CB  LEU A  12     2896   3238   2010   -134   -534    166       C  
ATOM     78  CG  LEU A  12      79.144 -22.831   4.497  1.00 33.16           C  
ANISOU   78  CG  LEU A  12     4301   4757   3543   -202   -696    180       C  
ATOM     79  CD1 LEU A  12      79.790 -24.001   5.224  1.00 35.22           C  
ANISOU   79  CD1 LEU A  12     4535   5075   3772   -227   -905    367       C  
ATOM     80  CD2 LEU A  12      79.997 -22.411   3.334  1.00 34.78           C  
ANISOU   80  CD2 LEU A  12     4364   4862   3990   -120   -650    170       C  
ATOM     81  N   LEU A  13      75.801 -23.294   1.628  1.00 19.51           N  
ANISOU   81  N   LEU A  13     2653   2835   1925     71   -218    112       N  
ATOM     82  CA  LEU A  13      74.829 -24.166   0.984  1.00 20.41           C  
ANISOU   82  CA  LEU A  13     2787   2925   2042    132   -154    150       C  
ATOM     83  C   LEU A  13      74.588 -25.404   1.838  1.00 22.50           C  
ANISOU   83  C   LEU A  13     3100   3227   2219     87   -228    246       C  
ATOM     84  O   LEU A  13      75.508 -25.938   2.463  1.00 24.66           O  
ANISOU   84  O   LEU A  13     3360   3514   2496     58   -360    338       O  
ATOM     85  CB  LEU A  13      75.331 -24.590  -0.399  1.00 21.04           C  
ANISOU   85  CB  LEU A  13     2796   2942   2255    222   -127    182       C  
ATOM     86  CG  LEU A  13      75.339 -23.541  -1.506  1.00 21.10           C  
ANISOU   86  CG  LEU A  13     2770   2925   2321    248    -43    142       C  
ATOM     87  CD1 LEU A  13      76.037 -24.065  -2.757  1.00 20.78           C  
ANISOU   87  CD1 LEU A  13     2664   2877   2356    300     -5    163       C  
ATOM     88  CD2 LEU A  13      73.914 -23.075  -1.816  1.00 20.23           C  
ANISOU   88  CD2 LEU A  13     2704   2808   2175    259     23    112       C  
ATOM     89  N   ALA A  14      73.345 -25.868   1.859  1.00 21.06           N  
ANISOU   89  N   ALA A  14     2965   3059   1979     73   -156    246       N  
ATOM     90  CA  ALA A  14      72.998 -27.107   2.532  1.00 20.07           C  
ANISOU   90  CA  ALA A  14     2887   2949   1791     15   -214    366       C  
ATOM     91  C   ALA A  14      72.380 -28.073   1.529  1.00 23.03           C  
ANISOU   91  C   ALA A  14     3239   3227   2285     79   -176    389       C  
ATOM     92  O   ALA A  14      71.693 -27.661   0.590  1.00 17.66           O  
ANISOU   92  O   ALA A  14     2532   2534   1645    129    -83    299       O  
ATOM     93  CB  ALA A  14      72.033 -26.858   3.699  1.00 28.79           C  
ANISOU   93  CB  ALA A  14     4066   4184   2690   -114   -151    341       C  
ATOM     94  N   ASN A  15      72.646 -29.364   1.722  1.00 18.96           N  
ANISOU   94  N   ASN A  15     2732   2633   1839     71   -269    516       N  
ATOM     95  CA  ASN A  15      72.002 -30.376   0.897  1.00 22.63           C  
ANISOU   95  CA  ASN A  15     3185   2990   2422    104   -239    514       C  
ATOM     96  C   ASN A  15      70.488 -30.232   0.968  1.00 17.15           C  
ANISOU   96  C   ASN A  15     2518   2367   1631     32   -134    473       C  
ATOM     97  O   ASN A  15      69.931 -29.770   1.967  1.00 16.49           O  
ANISOU   97  O   ASN A  15     2471   2402   1392    -64    -91    489       O  
ATOM     98  CB  ASN A  15      72.394 -31.774   1.355  1.00 25.93           C  
ANISOU   98  CB  ASN A  15     3615   3281   2958     85   -364    673       C  
ATOM     99  CG  ASN A  15      73.864 -32.039   1.193  1.00 28.93           C  
ANISOU   99  CG  ASN A  15     3920   3563   3510    182   -472    706       C  
ATOM    100  ND2 ASN A  15      74.432 -32.803   2.118  1.00 27.29           N  
ANISOU  100  ND2 ASN A  15     3716   3289   3364    148   -635    901       N  
ATOM    101  OD1 ASN A  15      74.488 -31.556   0.249  1.00 22.25           O  
ANISOU  101  OD1 ASN A  15     3000   2707   2747    280   -412    572       O  
ATOM    102  N   ALA A  16      69.818 -30.641  -0.106  1.00 15.49           N  
ANISOU  102  N   ALA A  16     2277   2096   1512     68    -90    404       N  
ATOM    103  CA  ALA A  16      68.364 -30.634  -0.115  1.00 29.27           C  
ANISOU  103  CA  ALA A  16     4010   3898   3214      0    -11    374       C  
ATOM    104  C   ALA A  16      67.858 -31.773  -0.981  1.00 27.12           C  
ANISOU  104  C   ALA A  16     3721   3515   3069     -7    -35    358       C  
ATOM    105  O   ALA A  16      68.589 -32.339  -1.800  1.00 27.29           O  
ANISOU  105  O   ALA A  16     3741   3427   3203     62    -80    314       O  
ATOM    106  CB  ALA A  16      67.801 -29.300  -0.618  1.00 17.73           C  
ANISOU  106  CB  ALA A  16     2496   2525   1715     47     69    259       C  
ATOM    107  N   GLU A  17      66.590 -32.111  -0.779  1.00 22.64           N  
ANISOU  107  N   GLU A  17     3132   2979   2493   -103      8    373       N  
ATOM    108  CA  GLU A  17      65.875 -32.997  -1.680  1.00 25.90           C  
ANISOU  108  CA  GLU A  17     3513   3307   3019   -133    -12    321       C  
ATOM    109  C   GLU A  17      64.489 -32.432  -1.924  1.00 24.91           C  
ANISOU  109  C   GLU A  17     3302   3300   2864   -178     52    264       C  
ATOM    110  O   GLU A  17      63.910 -31.761  -1.064  1.00 22.03           O  
ANISOU  110  O   GLU A  17     2900   3049   2424   -219    134    288       O  
ATOM    111  CB  GLU A  17      65.758 -34.440  -1.150  1.00 22.86           C  
ANISOU  111  CB  GLU A  17     3166   2776   2744   -236    -65    437       C  
ATOM    112  CG  GLU A  17      64.942 -34.618   0.117  1.00 23.64           C  
ANISOU  112  CG  GLU A  17     3271   2953   2759   -389    -16    583       C  
ATOM    113  CD  GLU A  17      63.455 -34.890  -0.141  1.00 36.08           C  
ANISOU  113  CD  GLU A  17     4762   4569   4377   -500     47    544       C  
ATOM    114  OE1 GLU A  17      63.031 -35.011  -1.314  1.00 30.55           O  
ANISOU  114  OE1 GLU A  17     4006   3829   3773   -464     18    411       O  
ATOM    115  OE2 GLU A  17      62.705 -34.990   0.849  1.00 30.48           O1-
ANISOU  115  OE2 GLU A  17     4034   3952   3594   -642    125    646       O1-
ATOM    116  N   CYS A  18      63.968 -32.708  -3.113  1.00 24.69           N  
ANISOU  116  N   CYS A  18     3230   3250   2902   -173     11    171       N  
ATOM    117  CA  CYS A  18      62.576 -32.432  -3.408  1.00 28.46           C  
ANISOU  117  CA  CYS A  18     3593   3817   3403   -229     28    137       C  
ATOM    118  C   CYS A  18      62.063 -33.515  -4.343  1.00 28.95           C  
ANISOU  118  C   CYS A  18     3640   3802   3557   -304    -51     72       C  
ATOM    119  O   CYS A  18      62.833 -34.310  -4.888  1.00 27.87           O  
ANISOU  119  O   CYS A  18     3584   3545   3461   -290   -101     15       O  
ATOM    120  CB  CYS A  18      62.396 -31.042  -4.024  1.00 24.15           C  
ANISOU  120  CB  CYS A  18     2981   3380   2817   -128     27     89       C  
ATOM    121  SG  CYS A  18      63.065 -30.935  -5.682  1.00 31.12           S  
ANISOU  121  SG  CYS A  18     3911   4259   3652    -60    -74     13       S  
ATOM    122  N   GLN A  19      60.744 -33.550  -4.493  1.00 22.90           N  
ANISOU  122  N   GLN A  19     2752   3102   2845   -390    -58     60       N  
ATOM    123  CA  GLN A  19      60.089 -34.424  -5.451  1.00 26.80           C  
ANISOU  123  CA  GLN A  19     3210   3554   3420   -484   -153    -26       C  
ATOM    124  C   GLN A  19      60.054 -33.745  -6.814  1.00 24.62           C  
ANISOU  124  C   GLN A  19     2911   3382   3061   -420   -249   -119       C  
ATOM    125  O   GLN A  19      59.895 -32.524  -6.907  1.00 21.48           O  
ANISOU  125  O   GLN A  19     2449   3100   2611   -333   -247    -76       O  
ATOM    126  CB  GLN A  19      58.671 -34.741  -4.970  1.00 26.84           C  
ANISOU  126  CB  GLN A  19     3066   3601   3530   -624   -128     18       C  
ATOM    127  CG  GLN A  19      57.829 -35.601  -5.884  1.00 24.31           C  
ANISOU  127  CG  GLN A  19     2678   3247   3310   -752   -243    -72       C  
ATOM    128  CD  GLN A  19      56.430 -35.834  -5.325  1.00 32.58           C  
ANISOU  128  CD  GLN A  19     3542   4351   4487   -899   -203    -15       C  
ATOM    129  NE2 GLN A  19      56.338 -36.637  -4.275  1.00 30.08           N  
ANISOU  129  NE2 GLN A  19     3250   3940   4238  -1022   -109     87       N  
ATOM    130  OE1 GLN A  19      55.447 -35.300  -5.836  1.00 38.89           O  
ANISOU  130  OE1 GLN A  19     4165   5278   5332   -910   -262    -47       O  
ATOM    131  N   GLU A  20      60.213 -34.534  -7.871  1.00 21.86           N  
ANISOU  131  N   GLU A  20     2618   2989   2700   -474   -336   -247       N  
ATOM    132  CA  GLU A  20      60.155 -33.959  -9.207  1.00 30.18           C  
ANISOU  132  CA  GLU A  20     3668   4182   3617   -456   -438   -323       C  
ATOM    133  C   GLU A  20      58.807 -33.279  -9.424  1.00 30.64           C  
ANISOU  133  C   GLU A  20     3554   4381   3708   -494   -532   -252       C  
ATOM    134  O   GLU A  20      57.761 -33.771  -8.986  1.00 26.21           O  
ANISOU  134  O   GLU A  20     2871   3802   3288   -594   -543   -237       O  
ATOM    135  CB  GLU A  20      60.412 -35.032 -10.267  1.00 27.05           C  
ANISOU  135  CB  GLU A  20     3357   3738   3184   -547   -501   -518       C  
ATOM    136  CG  GLU A  20      59.227 -35.875 -10.669  1.00 39.98           C  
ANISOU  136  CG  GLU A  20     4915   5369   4908   -716   -611   -603       C  
ATOM    137  CD  GLU A  20      59.571 -36.831 -11.806  1.00 53.46           C  
ANISOU  137  CD  GLU A  20     6723   7037   6551   -809   -666   -852       C  
ATOM    138  OE1 GLU A  20      59.966 -37.978 -11.515  1.00 57.17           O  
ANISOU  138  OE1 GLU A  20     7255   7283   7182   -847   -612   -963       O  
ATOM    139  OE2 GLU A  20      59.461 -36.436 -12.988  1.00 54.61           O1-
ANISOU  139  OE2 GLU A  20     6887   7374   6488   -852   -765   -940       O1-
ATOM    140  N   GLY A  21      58.841 -32.121 -10.079  1.00 22.88           N  
ANISOU  140  N   GLY A  21     2543   3530   2620   -415   -602   -190       N  
ATOM    141  CA  GLY A  21      57.672 -31.288 -10.242  1.00 25.78           C  
ANISOU  141  CA  GLY A  21     2721   4005   3068   -407   -706    -90       C  
ATOM    142  C   GLY A  21      57.490 -30.249  -9.158  1.00 30.49           C  
ANISOU  142  C   GLY A  21     3212   4576   3797   -284   -591     16       C  
ATOM    143  O   GLY A  21      56.759 -29.273  -9.366  1.00 31.94           O  
ANISOU  143  O   GLY A  21     3237   4822   4077   -223   -671    102       O  
ATOM    144  N   GLN A  22      58.144 -30.422  -8.015  1.00 21.69           N  
ANISOU  144  N   GLN A  22     2177   3368   2696   -250   -415      6       N  
ATOM    145  CA  GLN A  22      58.063 -29.467  -6.928  1.00 23.20           C  
ANISOU  145  CA  GLN A  22     2293   3549   2974   -155   -283     57       C  
ATOM    146  C   GLN A  22      59.208 -28.463  -7.030  1.00 27.93           C  
ANISOU  146  C   GLN A  22     3006   4126   3481    -29   -262     91       C  
ATOM    147  O   GLN A  22      60.098 -28.574  -7.875  1.00 27.70           O  
ANISOU  147  O   GLN A  22     3110   4102   3315    -22   -326     86       O  
ATOM    148  CB  GLN A  22      58.089 -30.193  -5.585  1.00 22.08           C  
ANISOU  148  CB  GLN A  22     2179   3355   2856   -226   -119     42       C  
ATOM    149  CG  GLN A  22      56.936 -31.155  -5.398  1.00 23.75           C  
ANISOU  149  CG  GLN A  22     2264   3579   3179   -376   -119     30       C  
ATOM    150  CD  GLN A  22      55.617 -30.442  -5.241  1.00 23.91           C  
ANISOU  150  CD  GLN A  22     2025   3689   3368   -363    -99     35       C  
ATOM    151  NE2 GLN A  22      54.536 -31.096  -5.656  1.00 25.66           N  
ANISOU  151  NE2 GLN A  22     2094   3948   3709   -482   -183     24       N  
ATOM    152  OE1 GLN A  22      55.566 -29.308  -4.757  1.00 26.68           O  
ANISOU  152  OE1 GLN A  22     2297   4066   3773   -246    -12     34       O  
ATOM    153  N   SER A  23      59.191 -27.473  -6.150  1.00 31.23           N  
ANISOU  153  N   SER A  23     3364   4523   3981     58   -156    106       N  
ATOM    154  CA  SER A  23      60.234 -26.463  -6.090  1.00 21.64           C  
ANISOU  154  CA  SER A  23     2240   3265   2716    160   -127    131       C  
ATOM    155  C   SER A  23      61.202 -26.766  -4.955  1.00 22.03           C  
ANISOU  155  C   SER A  23     2418   3275   2679    147     10     89       C  
ATOM    156  O   SER A  23      60.878 -27.477  -4.002  1.00 25.91           O  
ANISOU  156  O   SER A  23     2903   3776   3166     70    102     61       O  
ATOM    157  CB  SER A  23      59.628 -25.072  -5.893  1.00 23.66           C  
ANISOU  157  CB  SER A  23     2342   3493   3154    266   -117    154       C  
ATOM    158  OG  SER A  23      58.839 -24.718  -7.003  1.00 34.88           O  
ANISOU  158  OG  SER A  23     3641   4944   4667    287   -292    243       O  
ATOM    159  N   VAL A  24      62.403 -26.201  -5.068  1.00 18.54           N  
ANISOU  159  N   VAL A  24     2086   2796   2163    206     10    105       N  
ATOM    160  CA  VAL A  24      63.415 -26.326  -4.032  1.00 21.66           C  
ANISOU  160  CA  VAL A  24     2588   3162   2482    198    100     81       C  
ATOM    161  C   VAL A  24      64.253 -25.056  -4.033  1.00 23.54           C  
ANISOU  161  C   VAL A  24     2852   3361   2730    278    108     86       C  
ATOM    162  O   VAL A  24      64.465 -24.426  -5.075  1.00 22.29           O  
ANISOU  162  O   VAL A  24     2688   3190   2592    324     32    141       O  
ATOM    163  CB  VAL A  24      64.287 -27.588  -4.233  1.00 21.98           C  
ANISOU  163  CB  VAL A  24     2745   3174   2434    150     67     90       C  
ATOM    164  CG1 VAL A  24      65.142 -27.443  -5.474  1.00 18.31           C  
ANISOU  164  CG1 VAL A  24     2333   2705   1918    192      0     93       C  
ATOM    165  CG2 VAL A  24      65.141 -27.839  -2.992  1.00 23.12           C  
ANISOU  165  CG2 VAL A  24     2968   3292   2523    127    124    104       C  
ATOM    166  N   CYS A  25      64.712 -24.672  -2.848  1.00 20.95           N  
ANISOU  166  N   CYS A  25     2559   3023   2379    272    196     36       N  
ATOM    167  CA  CYS A  25      65.464 -23.443  -2.655  1.00 26.43           C  
ANISOU  167  CA  CYS A  25     3272   3663   3109    326    211     13       C  
ATOM    168  C   CYS A  25      66.762 -23.746  -1.921  1.00 28.90           C  
ANISOU  168  C   CYS A  25     3694   3983   3303    284    220      5       C  
ATOM    169  O   CYS A  25      66.755 -24.469  -0.919  1.00 30.78           O  
ANISOU  169  O   CYS A  25     3973   4273   3447    213    257    -10       O  
ATOM    170  CB  CYS A  25      64.630 -22.430  -1.869  1.00 38.50           C  
ANISOU  170  CB  CYS A  25     4701   5167   4760    356    305    -91       C  
ATOM    171  SG  CYS A  25      65.333 -20.783  -1.806  1.00 51.58           S  
ANISOU  171  SG  CYS A  25     6357   6697   6546    425    309   -139       S  
ATOM    172  N   PHE A  26      67.872 -23.215  -2.441  1.00 20.87           N  
ANISOU  172  N   PHE A  26     2714   2922   2293    316    175     38       N  
ATOM    173  CA  PHE A  26      69.169 -23.179  -1.776  1.00 22.54           C  
ANISOU  173  CA  PHE A  26     2988   3133   2445    286    165     28       C  
ATOM    174  C   PHE A  26      69.507 -21.731  -1.437  1.00 27.64           C  
ANISOU  174  C   PHE A  26     3618   3719   3167    299    188    -34       C  
ATOM    175  O   PHE A  26      69.107 -20.806  -2.149  1.00 28.74           O  
ANISOU  175  O   PHE A  26     3705   3783   3431    349    186    -17       O  
ATOM    176  CB  PHE A  26      70.286 -23.742  -2.664  1.00 31.23           C  
ANISOU  176  CB  PHE A  26     4111   4225   3529    302    110     95       C  
ATOM    177  CG  PHE A  26      70.187 -25.212  -2.923  1.00 40.19           C  
ANISOU  177  CG  PHE A  26     5266   5377   4629    291     87    120       C  
ATOM    178  CD1 PHE A  26      70.801 -26.123  -2.077  1.00 35.79           C  
ANISOU  178  CD1 PHE A  26     4741   4811   4048    261     53    145       C  
ATOM    179  CD2 PHE A  26      69.497 -25.687  -4.028  1.00 44.18           C  
ANISOU  179  CD2 PHE A  26     5755   5893   5138    302     79    123       C  
ATOM    180  CE1 PHE A  26      70.722 -27.486  -2.325  1.00 36.57           C  
ANISOU  180  CE1 PHE A  26     4852   4871   4173    256     24    170       C  
ATOM    181  CE2 PHE A  26      69.409 -27.042  -4.280  1.00 42.92           C  
ANISOU  181  CE2 PHE A  26     5615   5718   4976    283     60    112       C  
ATOM    182  CZ  PHE A  26      70.023 -27.944  -3.428  1.00 43.08           C  
ANISOU  182  CZ  PHE A  26     5663   5689   5019    267     38    134       C  
ATOM    183  N   GLU A  27      70.270 -21.533  -0.364  1.00 25.24           N  
ANISOU  183  N   GLU A  27     3356   3435   2798    242    190    -96       N  
ATOM    184  CA  GLU A  27      70.543 -20.190   0.126  1.00 29.90           C  
ANISOU  184  CA  GLU A  27     3936   3958   3468    230    216   -202       C  
ATOM    185  C   GLU A  27      71.950 -20.096   0.689  1.00 30.85           C  
ANISOU  185  C   GLU A  27     4097   4100   3525    162    151   -209       C  
ATOM    186  O   GLU A  27      72.449 -21.045   1.302  1.00 25.97           O  
ANISOU  186  O   GLU A  27     3520   3576   2772    110     98   -167       O  
ATOM    187  CB  GLU A  27      69.539 -19.785   1.211  1.00 31.19           C  
ANISOU  187  CB  GLU A  27     4088   4150   3614    201    321   -369       C  
ATOM    188  CG  GLU A  27      68.121 -19.590   0.706  1.00 48.04           C  
ANISOU  188  CG  GLU A  27     6127   6238   5886    279    387   -386       C  
ATOM    189  CD  GLU A  27      67.091 -20.111   1.684  1.00 63.70           C  
ANISOU  189  CD  GLU A  27     8092   8340   7772    225    504   -492       C  
ATOM    190  OE1 GLU A  27      67.105 -21.332   1.953  1.00 66.36           O  
ANISOU  190  OE1 GLU A  27     8483   8794   7938    157    484   -404       O  
ATOM    191  OE2 GLU A  27      66.280 -19.303   2.190  1.00 73.79           O1-
ANISOU  191  OE2 GLU A  27     9291   9585   9160    246    623   -665       O1-
ATOM    192  N   ILE A  28      72.576 -18.934   0.490  1.00 23.94           N  
ANISOU  192  N   ILE A  28     3199   3123   2775    157    139   -247       N  
ATOM    193  CA  ILE A  28      73.863 -18.607   1.087  1.00 25.98           C  
ANISOU  193  CA  ILE A  28     3469   3393   3009     75     71   -281       C  
ATOM    194  C   ILE A  28      73.838 -17.157   1.546  1.00 28.33           C  
ANISOU  194  C   ILE A  28     3760   3572   3431     36    105   -443       C  
ATOM    195  O   ILE A  28      72.974 -16.368   1.160  1.00 27.36           O  
ANISOU  195  O   ILE A  28     3605   3321   3469     98    173   -489       O  
ATOM    196  CB  ILE A  28      75.046 -18.810   0.119  1.00 31.47           C  
ANISOU  196  CB  ILE A  28     4115   4071   3771     88     12   -140       C  
ATOM    197  CG1 ILE A  28      74.817 -18.017  -1.169  1.00 33.20           C  
ANISOU  197  CG1 ILE A  28     4295   4177   4143    136     54    -62       C  
ATOM    198  CG2 ILE A  28      75.253 -20.269  -0.180  1.00 25.96           C  
ANISOU  198  CG2 ILE A  28     3413   3466   2984    124    -21    -35       C  
ATOM    199  CD1 ILE A  28      76.044 -17.898  -2.019  1.00 28.35           C  
ANISOU  199  CD1 ILE A  28     3625   3559   3586    107     35     46       C  
ATOM    200  N   ARG A  29      74.814 -16.821   2.380  1.00 26.64           N  
ANISOU  200  N   ARG A  29     3565   3389   3167    -70     41   -530       N  
ATOM    201  CA  ARG A  29      75.159 -15.445   2.695  1.00 29.06           C  
ANISOU  201  CA  ARG A  29     3859   3555   3626   -131     47   -685       C  
ATOM    202  C   ARG A  29      76.669 -15.334   2.591  1.00 27.33           C  
ANISOU  202  C   ARG A  29     3601   3345   3439   -215    -70   -610       C  
ATOM    203  O   ARG A  29      77.388 -16.164   3.153  1.00 26.63           O  
ANISOU  203  O   ARG A  29     3518   3413   3187   -273   -167   -566       O  
ATOM    204  CB  ARG A  29      74.691 -15.052   4.093  1.00 30.78           C  
ANISOU  204  CB  ARG A  29     4139   3832   3725   -220     99   -955       C  
ATOM    205  CG  ARG A  29      73.198 -14.896   4.199  1.00 34.00           C  
ANISOU  205  CG  ARG A  29     4541   4203   4174   -139    251  -1076       C  
ATOM    206  CD  ARG A  29      72.775 -14.487   5.604  1.00 36.68           C  
ANISOU  206  CD  ARG A  29     4935   4628   4374   -245    347  -1388       C  
ATOM    207  NE  ARG A  29      73.505 -13.323   6.099  1.00 32.55           N  
ANISOU  207  NE  ARG A  29     4424   3988   3956   -344    317  -1601       N  
ATOM    208  CZ  ARG A  29      74.134 -13.270   7.272  1.00 36.09           C  
ANISOU  208  CZ  ARG A  29     4951   4594   4166   -521    267  -1778       C  
ATOM    209  NH1 ARG A  29      74.121 -14.314   8.094  1.00 31.23           N1+
ANISOU  209  NH1 ARG A  29     4416   4266   3183   -618    235  -1734       N1+
ATOM    210  NH2 ARG A  29      74.758 -12.160   7.636  1.00 31.37           N  
ANISOU  210  NH2 ARG A  29     4355   3865   3698   -617    236  -1993       N  
ATOM    211  N   VAL A  30      77.149 -14.333   1.860  1.00 23.29           N  
ANISOU  211  N   VAL A  30     3032   2659   3156   -226    -69   -572       N  
ATOM    212  CA  VAL A  30      78.577 -14.166   1.617  1.00 28.42           C  
ANISOU  212  CA  VAL A  30     3609   3311   3877   -314   -157   -490       C  
ATOM    213  C   VAL A  30      78.915 -12.684   1.688  1.00 33.70           C  
ANISOU  213  C   VAL A  30     4255   3770   4779   -405   -160   -599       C  
ATOM    214  O   VAL A  30      78.249 -11.859   1.057  1.00 41.38           O  
ANISOU  214  O   VAL A  30     5229   4545   5949   -352    -91   -576       O  
ATOM    215  CB  VAL A  30      79.007 -14.766   0.266  1.00 42.19           C  
ANISOU  215  CB  VAL A  30     5282   5088   5661   -247   -135   -250       C  
ATOM    216  CG1 VAL A  30      78.173 -14.205  -0.863  1.00 54.73           C  
ANISOU  216  CG1 VAL A  30     6881   6540   7375   -173    -49   -144       C  
ATOM    217  CG2 VAL A  30      80.487 -14.498   0.023  1.00 49.92           C  
ANISOU  217  CG2 VAL A  30     6149   6072   6748   -347   -192   -185       C  
ATOM    218  N   SER A  31      79.942 -12.356   2.470  1.00 36.43           N  
ANISOU  218  N   SER A  31     4573   4147   5122   -549   -260   -709       N  
ATOM    219  CA  SER A  31      80.363 -10.985   2.710  1.00 43.97           C  
ANISOU  219  CA  SER A  31     5507   4896   6303   -671   -280   -853       C  
ATOM    220  C   SER A  31      81.772 -10.769   2.175  1.00 45.52           C  
ANISOU  220  C   SER A  31     5578   5080   6636   -778   -357   -706       C  
ATOM    221  O   SER A  31      82.555 -11.711   2.040  1.00 39.17           O  
ANISOU  221  O   SER A  31     4697   4466   5720   -778   -417   -574       O  
ATOM    222  CB  SER A  31      80.334 -10.654   4.206  1.00 54.98           C  
ANISOU  222  CB  SER A  31     6974   6346   7570   -793   -334  -1170       C  
ATOM    223  OG  SER A  31      81.175 -11.541   4.924  1.00 60.46           O  
ANISOU  223  OG  SER A  31     7654   7299   8019   -881   -475  -1145       O  
ATOM    224  N   GLY A  32      82.101  -9.507   1.896  1.00 41.95           N  
ANISOU  224  N   GLY A  32     5089   4386   6464   -875   -351   -737       N  
ATOM    225  CA  GLY A  32      83.427  -9.161   1.421  1.00 39.29           C  
ANISOU  225  CA  GLY A  32     4616   4026   6287  -1011   -406   -608       C  
ATOM    226  C   GLY A  32      83.556  -7.727   0.947  1.00 45.92           C  
ANISOU  226  C   GLY A  32     5432   4547   7468  -1113   -379   -592       C  
ATOM    227  O   GLY A  32      82.591  -7.141   0.448  1.00 44.40           O  
ANISOU  227  O   GLY A  32     5306   4142   7420  -1026   -301   -549       O  
ATOM    228  N   ILE A  33      84.747  -7.154   1.096  1.00 35.95           N  
ANISOU  228  N   ILE A  33     4058   3235   6366  -1304   -458   -609       N  
ATOM    229  CA  ILE A  33      85.025  -5.798   0.627  1.00 41.53           C  
ANISOU  229  CA  ILE A  33     4728   3620   7432  -1438   -444   -563       C  
ATOM    230  C   ILE A  33      86.138  -5.868  -0.411  1.00 45.42           C  
ANISOU  230  C   ILE A  33     5060   4183   8016  -1543   -413   -267       C  
ATOM    231  O   ILE A  33      87.269  -6.248  -0.075  1.00 46.91           O  
ANISOU  231  O   ILE A  33     5108   4551   8165  -1655   -488   -292       O  
ATOM    232  CB  ILE A  33      85.406  -4.866   1.789  1.00 51.60           C  
ANISOU  232  CB  ILE A  33     6012   4733   8860  -1616   -553   -894       C  
ATOM    233  CG1 ILE A  33      84.262  -4.767   2.799  1.00 59.76           C  
ANISOU  233  CG1 ILE A  33     7201   5717   9786  -1523   -535  -1225       C  
ATOM    234  CG2 ILE A  33      85.765  -3.484   1.267  1.00 54.21           C  
ANISOU  234  CG2 ILE A  33     6292   4692   9614  -1769   -547   -827       C  
ATOM    235  CD1 ILE A  33      83.012  -4.118   2.244  1.00 60.32           C  
ANISOU  235  CD1 ILE A  33     7350   5490  10078  -1372   -417  -1194       C  
ATOM    236  N   PRO A  34      85.873  -5.534  -1.685  1.00 52.75           N  
ANISOU  236  N   PRO A  34     5989   4998   9058  -1520   -305     25       N  
ATOM    237  CA  PRO A  34      84.574  -5.139  -2.249  1.00 53.84           C  
ANISOU  237  CA  PRO A  34     6259   4937   9262  -1382   -247    128       C  
ATOM    238  C   PRO A  34      83.576  -6.300  -2.310  1.00 50.54           C  
ANISOU  238  C   PRO A  34     5930   4740   8533  -1155   -201    123       C  
ATOM    239  O   PRO A  34      83.987  -7.449  -2.121  1.00 37.57           O  
ANISOU  239  O   PRO A  34     4246   3397   6632  -1111   -198     97       O  
ATOM    240  CB  PRO A  34      84.942  -4.652  -3.656  1.00 57.28           C  
ANISOU  240  CB  PRO A  34     6638   5293   9834  -1482   -175    507       C  
ATOM    241  CG  PRO A  34      86.191  -5.382  -3.986  1.00 62.42           C  
ANISOU  241  CG  PRO A  34     7135   6243  10338  -1584   -126    598       C  
ATOM    242  CD  PRO A  34      86.945  -5.491  -2.695  1.00 56.35           C  
ANISOU  242  CD  PRO A  34     6290   5533   9589  -1661   -239    297       C  
ATOM    243  N   PRO A  35      82.296  -6.003  -2.535  1.00 52.04           N  
ANISOU  243  N   PRO A  35     6223   4766   8784  -1015   -177    144       N  
ATOM    244  CA  PRO A  35      81.284  -7.068  -2.621  1.00 48.11           C  
ANISOU  244  CA  PRO A  35     5797   4465   8018   -817   -135    143       C  
ATOM    245  C   PRO A  35      81.660  -8.095  -3.673  1.00 48.25           C  
ANISOU  245  C   PRO A  35     5775   4760   7796   -793    -74    393       C  
ATOM    246  O   PRO A  35      81.833  -7.758  -4.854  1.00 45.38           O  
ANISOU  246  O   PRO A  35     5390   4366   7488   -852    -32    673       O  
ATOM    247  CB  PRO A  35      80.009  -6.310  -3.014  1.00 46.12           C  
ANISOU  247  CB  PRO A  35     5607   3941   7975   -706   -130    210       C  
ATOM    248  CG  PRO A  35      80.216  -4.941  -2.479  1.00 44.99           C  
ANISOU  248  CG  PRO A  35     5448   3441   8204   -812   -175     66       C  
ATOM    249  CD  PRO A  35      81.688  -4.662  -2.616  1.00 46.12           C  
ANISOU  249  CD  PRO A  35     5509   3614   8399  -1029   -200    146       C  
ATOM    250  N   PRO A  36      81.790  -9.361  -3.289  1.00 47.08           N  
ANISOU  250  N   PRO A  36     5620   4887   7381   -717    -65    298       N  
ATOM    251  CA  PRO A  36      82.313 -10.360  -4.225  1.00 46.08           C  
ANISOU  251  CA  PRO A  36     5433   5008   7066   -702      8    472       C  
ATOM    252  C   PRO A  36      81.328 -10.681  -5.334  1.00 41.63           C  
ANISOU  252  C   PRO A  36     4945   4488   6383   -601     69    659       C  
ATOM    253  O   PRO A  36      80.109 -10.588  -5.167  1.00 43.86           O  
ANISOU  253  O   PRO A  36     5317   4677   6669   -487     39    621       O  
ATOM    254  CB  PRO A  36      82.557 -11.584  -3.334  1.00 45.61           C  
ANISOU  254  CB  PRO A  36     5353   5159   6815   -629    -30    299       C  
ATOM    255  CG  PRO A  36      81.577 -11.427  -2.220  1.00 40.32           C  
ANISOU  255  CG  PRO A  36     4794   4402   6123   -561    -91     94       C  
ATOM    256  CD  PRO A  36      81.472  -9.943  -1.974  1.00 43.71           C  
ANISOU  256  CD  PRO A  36     5241   4551   6815   -653   -118     29       C  
ATOM    257  N   THR A  37      81.880 -11.059  -6.482  1.00 36.85           N  
ANISOU  257  N   THR A  37     4288   4043   5669   -657    159    849       N  
ATOM    258  CA  THR A  37      81.094 -11.595  -7.583  1.00 29.98           C  
ANISOU  258  CA  THR A  37     3488   3296   4607   -587    211   1006       C  
ATOM    259  C   THR A  37      81.021 -13.117  -7.472  1.00 28.12           C  
ANISOU  259  C   THR A  37     3248   3296   4139   -470    254    873       C  
ATOM    260  O   THR A  37      81.933 -13.768  -6.952  1.00 29.64           O  
ANISOU  260  O   THR A  37     3347   3593   4321   -473    274    748       O  
ATOM    261  CB  THR A  37      81.700 -11.190  -8.927  1.00 33.91           C  
ANISOU  261  CB  THR A  37     3950   3870   5064   -740    303   1269       C  
ATOM    262  CG2 THR A  37      82.037  -9.702  -8.926  1.00 36.15           C  
ANISOU  262  CG2 THR A  37     4214   3893   5628   -889    254   1414       C  
ATOM    263  OG1 THR A  37      82.900 -11.935  -9.152  1.00 39.08           O  
ANISOU  263  OG1 THR A  37     4480   4748   5619   -802    425   1213       O  
ATOM    264  N   LEU A  38      79.926 -13.679  -7.970  1.00 29.06           N  
ANISOU  264  N   LEU A  38     3458   3481   4104   -369    252    911       N  
ATOM    265  CA  LEU A  38      79.600 -15.083  -7.773  1.00 25.93           C  
ANISOU  265  CA  LEU A  38     3078   3245   3530   -252    272    775       C  
ATOM    266  C   LEU A  38      79.621 -15.839  -9.096  1.00 27.04           C  
ANISOU  266  C   LEU A  38     3225   3588   3459   -268    372    862       C  
ATOM    267  O   LEU A  38      79.259 -15.305 -10.145  1.00 31.46           O  
ANISOU  267  O   LEU A  38     3835   4173   3946   -340    386   1049       O  
ATOM    268  CB  LEU A  38      78.220 -15.234  -7.124  1.00 25.03           C  
ANISOU  268  CB  LEU A  38     3053   3048   3410   -130    189    694       C  
ATOM    269  CG  LEU A  38      78.107 -15.368  -5.605  1.00 34.06           C  
ANISOU  269  CG  LEU A  38     4200   4123   4616    -80    130    494       C  
ATOM    270  CD1 LEU A  38      78.892 -14.290  -4.872  1.00 36.33           C  
ANISOU  270  CD1 LEU A  38     4444   4270   5088   -175     93    439       C  
ATOM    271  CD2 LEU A  38      76.635 -15.342  -5.189  1.00 33.06           C  
ANISOU  271  CD2 LEU A  38     4145   3925   4490     17     93    435       C  
ATOM    272  N   LYS A  39      80.041 -17.099  -9.027  1.00 30.05           N  
ANISOU  272  N   LYS A  39     3559   4111   3747   -209    435    722       N  
ATOM    273  CA  LYS A  39      80.000 -18.023 -10.151  1.00 30.40           C  
ANISOU  273  CA  LYS A  39     3614   4346   3589   -210    544    714       C  
ATOM    274  C   LYS A  39      79.370 -19.319  -9.668  1.00 29.81           C  
ANISOU  274  C   LYS A  39     3574   4290   3462    -74    506    552       C  
ATOM    275  O   LYS A  39      79.834 -19.901  -8.681  1.00 29.63           O  
ANISOU  275  O   LYS A  39     3488   4220   3548     -5    472    434       O  
ATOM    276  CB  LYS A  39      81.404 -18.296 -10.709  1.00 29.95           C  
ANISOU  276  CB  LYS A  39     3418   4428   3534   -289    707    677       C  
ATOM    277  CG  LYS A  39      81.977 -17.157 -11.530  1.00 45.01           C  
ANISOU  277  CG  LYS A  39     5298   6373   5432   -466    786    869       C  
ATOM    278  CD  LYS A  39      83.305 -17.555 -12.152  1.00 56.53           C  
ANISOU  278  CD  LYS A  39     6596   8011   6873   -550    991    805       C  
ATOM    279  CE  LYS A  39      83.792 -16.508 -13.131  1.00 61.62           C  
ANISOU  279  CE  LYS A  39     7226   8738   7448   -763   1099   1024       C  
ATOM    280  NZ  LYS A  39      85.070 -16.918 -13.778  1.00 67.75           N1+
ANISOU  280  NZ  LYS A  39     7822   9722   8197   -858   1342    938       N1+
ATOM    281  N   TRP A  40      78.322 -19.768 -10.357  1.00 26.20           N  
ANISOU  281  N   TRP A  40     3213   3901   2842    -51    495    567       N  
ATOM    282  CA  TRP A  40      77.572 -20.958  -9.970  1.00 23.38           C  
ANISOU  282  CA  TRP A  40     2895   3542   2445     55    453    434       C  
ATOM    283  C   TRP A  40      77.863 -22.099 -10.933  1.00 23.94           C  
ANISOU  283  C   TRP A  40     2952   3763   2381     48    571    316       C  
ATOM    284  O   TRP A  40      77.943 -21.893 -12.147  1.00 27.16           O  
ANISOU  284  O   TRP A  40     3385   4320   2615    -49    657    365       O  
ATOM    285  CB  TRP A  40      76.074 -20.684  -9.952  1.00 22.86           C  
ANISOU  285  CB  TRP A  40     2926   3428   2334     82    342    503       C  
ATOM    286  CG  TRP A  40      75.679 -19.602  -9.034  1.00 27.86           C  
ANISOU  286  CG  TRP A  40     3563   3900   3122    102    253    566       C  
ATOM    287  CD1 TRP A  40      75.747 -18.254  -9.270  1.00 28.32           C  
ANISOU  287  CD1 TRP A  40     3620   3873   3268     41    224    713       C  
ATOM    288  CD2 TRP A  40      75.118 -19.756  -7.731  1.00 24.32           C  
ANISOU  288  CD2 TRP A  40     3123   3349   2769    176    191    470       C  
ATOM    289  CE2 TRP A  40      74.879 -18.461  -7.225  1.00 24.63           C  
ANISOU  289  CE2 TRP A  40     3158   3247   2951    165    145    519       C  
ATOM    290  CE3 TRP A  40      74.807 -20.864  -6.933  1.00 25.35           C  
ANISOU  290  CE3 TRP A  40     3263   3491   2876    236    176    351       C  
ATOM    291  NE1 TRP A  40      75.268 -17.563  -8.185  1.00 26.53           N  
ANISOU  291  NE1 TRP A  40     3391   3476   3212     90    155    675       N  
ATOM    292  CZ2 TRP A  40      74.339 -18.243  -5.960  1.00 24.39           C  
ANISOU  292  CZ2 TRP A  40     3136   3121   3012    209    110    411       C  
ATOM    293  CZ3 TRP A  40      74.267 -20.647  -5.675  1.00 25.44           C  
ANISOU  293  CZ3 TRP A  40     3290   3423   2954    264    130    292       C  
ATOM    294  CH2 TRP A  40      74.034 -19.344  -5.205  1.00 23.71           C  
ANISOU  294  CH2 TRP A  40     3066   3095   2847    250    110    301       C  
ATOM    295  N   GLU A  41      78.005 -23.306 -10.390  1.00 24.40           N  
ANISOU  295  N   GLU A  41     2973   3779   2517    142    573    158       N  
ATOM    296  CA  GLU A  41      78.336 -24.475 -11.192  1.00 21.56           C  
ANISOU  296  CA  GLU A  41     2582   3512   2098    155    694    -11       C  
ATOM    297  C   GLU A  41      77.435 -25.642 -10.818  1.00 21.77           C  
ANISOU  297  C   GLU A  41     2667   3459   2147    235    617   -115       C  
ATOM    298  O   GLU A  41      76.966 -25.745  -9.684  1.00 23.82           O  
ANISOU  298  O   GLU A  41     2947   3589   2514    295    493    -70       O  
ATOM    299  CB  GLU A  41      79.791 -24.908 -10.995  1.00 25.72           C  
ANISOU  299  CB  GLU A  41     2943   4028   2803    195    802   -119       C  
ATOM    300  CG  GLU A  41      80.839 -23.909 -11.415  1.00 38.00           C  
ANISOU  300  CG  GLU A  41     4401   5674   4362     97    911    -40       C  
ATOM    301  CD  GLU A  41      82.232 -24.388 -11.063  1.00 50.23           C  
ANISOU  301  CD  GLU A  41     5742   7197   6147    154    993   -151       C  
ATOM    302  OE1 GLU A  41      82.559 -24.449  -9.858  1.00 53.21           O  
ANISOU  302  OE1 GLU A  41     6054   7436   6729    228    853   -119       O  
ATOM    303  OE2 GLU A  41      82.995 -24.723 -11.989  1.00 58.42           O1-
ANISOU  303  OE2 GLU A  41     6672   8364   7163    118   1197   -276       O1-
ATOM    304  N   LYS A  42      77.226 -26.543 -11.775  1.00 26.83           N  
ANISOU  304  N   LYS A  42     3333   4181   2679    217    701   -268       N  
ATOM    305  CA  LYS A  42      76.558 -27.811 -11.511  1.00 25.58           C  
ANISOU  305  CA  LYS A  42     3209   3922   2589    280    648   -398       C  
ATOM    306  C   LYS A  42      77.450 -28.931 -12.014  1.00 27.15           C  
ANISOU  306  C   LYS A  42     3316   4107   2893    323    794   -635       C  
ATOM    307  O   LYS A  42      77.802 -28.960 -13.198  1.00 27.29           O  
ANISOU  307  O   LYS A  42     3328   4290   2752    250    952   -766       O  
ATOM    308  CB  LYS A  42      75.185 -27.883 -12.178  1.00 23.14           C  
ANISOU  308  CB  LYS A  42     3021   3694   2077    208    580   -390       C  
ATOM    309  CG  LYS A  42      74.464 -29.193 -11.922  1.00 33.60           C  
ANISOU  309  CG  LYS A  42     4374   4902   3489    246    525   -526       C  
ATOM    310  CD  LYS A  42      73.180 -29.258 -12.724  1.00 42.33           C  
ANISOU  310  CD  LYS A  42     5575   6117   4392    152    455   -536       C  
ATOM    311  CE  LYS A  42      72.397 -30.526 -12.421  1.00 44.90           C  
ANISOU  311  CE  LYS A  42     5921   6310   4829    167    391   -661       C  
ATOM    312  NZ  LYS A  42      73.162 -31.746 -12.762  1.00 51.97           N1+
ANISOU  312  NZ  LYS A  42     6780   7121   5847    201    506   -914       N1+
ATOM    313  N   ASP A  43      77.800 -29.852 -11.117  1.00 21.18           N  
ANISOU  313  N   ASP A  43     2486   3154   2407    437    742   -690       N  
ATOM    314  CA  ASP A  43      78.719 -30.946 -11.429  1.00 25.89           C  
ANISOU  314  CA  ASP A  43     2955   3668   3215    517    864   -915       C  
ATOM    315  C   ASP A  43      80.003 -30.415 -12.063  1.00 28.35           C  
ANISOU  315  C   ASP A  43     3124   4117   3528    499   1053   -986       C  
ATOM    316  O   ASP A  43      80.523 -30.977 -13.025  1.00 27.61           O  
ANISOU  316  O   ASP A  43     2960   4096   3433    493   1250  -1231       O  
ATOM    317  CB  ASP A  43      78.050 -31.986 -12.332  1.00 28.12           C  
ANISOU  317  CB  ASP A  43     3310   3949   3427    487    932  -1153       C  
ATOM    318  CG  ASP A  43      76.807 -32.604 -11.693  1.00 34.97           C  
ANISOU  318  CG  ASP A  43     4288   4664   4333    491    752  -1085       C  
ATOM    319  OD1 ASP A  43      76.664 -32.523 -10.454  1.00 26.23           O  
ANISOU  319  OD1 ASP A  43     3177   3422   3366    543    601   -888       O  
ATOM    320  OD2 ASP A  43      75.968 -33.169 -12.427  1.00 41.61           O1-
ANISOU  320  OD2 ASP A  43     5219   5539   5053    421    764  -1232       O1-
ATOM    321  N   GLY A  44      80.503 -29.297 -11.534  1.00 29.66           N  
ANISOU  321  N   GLY A  44     3245   4329   3695    474   1006   -786       N  
ATOM    322  CA  GLY A  44      81.745 -28.713 -11.994  1.00 33.26           C  
ANISOU  322  CA  GLY A  44     3545   4908   4185    438   1172   -814       C  
ATOM    323  C   GLY A  44      81.679 -27.955 -13.305  1.00 36.05           C  
ANISOU  323  C   GLY A  44     3965   5520   4213    276   1346   -824       C  
ATOM    324  O   GLY A  44      82.718 -27.468 -13.767  1.00 41.98           O  
ANISOU  324  O   GLY A  44     4581   6397   4973    216   1515   -844       O  
ATOM    325  N   GLN A  45      80.508 -27.845 -13.926  1.00 29.83           N  
ANISOU  325  N   GLN A  45     3369   4828   3137    187   1302   -795       N  
ATOM    326  CA  GLN A  45      80.361 -27.076 -15.155  1.00 32.99           C  
ANISOU  326  CA  GLN A  45     3854   5489   3191      9   1417   -741       C  
ATOM    327  C   GLN A  45      79.498 -25.839 -14.904  1.00 26.20           C  
ANISOU  327  C   GLN A  45     3127   4633   2196    -64   1229   -428       C  
ATOM    328  O   GLN A  45      78.610 -25.871 -14.047  1.00 33.36           O  
ANISOU  328  O   GLN A  45     4101   5379   3193     15   1034   -340       O  
ATOM    329  CB  GLN A  45      79.726 -27.927 -16.260  1.00 34.32           C  
ANISOU  329  CB  GLN A  45     4151   5713   3175    -40   1434   -901       C  
ATOM    330  CG  GLN A  45      80.477 -29.220 -16.525  1.00 62.98           C  
ANISOU  330  CG  GLN A  45     7673   9255   7002     50   1568  -1196       C  
ATOM    331  CD  GLN A  45      79.554 -30.350 -16.943  1.00 65.38           C  
ANISOU  331  CD  GLN A  45     8087   9503   7252     55   1512  -1386       C  
ATOM    332  NE2 GLN A  45      78.728 -30.096 -17.954  1.00 64.64           N  
ANISOU  332  NE2 GLN A  45     8150   9579   6830    -91   1470  -1347       N  
ATOM    333  OE1 GLN A  45      79.581 -31.439 -16.360  1.00 61.86           O  
ANISOU  333  OE1 GLN A  45     7578   8850   7078    183   1490  -1552       O  
ATOM    334  N   PRO A  46      79.743 -24.738 -15.619  1.00 29.64           N  
ANISOU  334  N   PRO A  46     3588   5236   2438   -215   1291   -254       N  
ATOM    335  CA  PRO A  46      78.974 -23.508 -15.384  1.00 27.01           C  
ANISOU  335  CA  PRO A  46     3358   4856   2050   -269   1106     50       C  
ATOM    336  C   PRO A  46      77.476 -23.757 -15.426  1.00 26.67           C  
ANISOU  336  C   PRO A  46     3455   4783   1895   -246    923     89       C  
ATOM    337  O   PRO A  46      76.960 -24.418 -16.327  1.00 26.34           O  
ANISOU  337  O   PRO A  46     3492   4859   1656   -301    938    -23       O  
ATOM    338  CB  PRO A  46      79.422 -22.589 -16.525  1.00 31.17           C  
ANISOU  338  CB  PRO A  46     3916   5546   2380   -449   1197    207       C  
ATOM    339  CG  PRO A  46      80.790 -23.057 -16.852  1.00 33.48           C  
ANISOU  339  CG  PRO A  46     4068   5902   2751   -455   1427     20       C  
ATOM    340  CD  PRO A  46      80.765 -24.552 -16.662  1.00 31.66           C  
ANISOU  340  CD  PRO A  46     3792   5620   2616   -318   1479   -292       C  
ATOM    341  N   LEU A  47      76.780 -23.230 -14.427  1.00 26.37           N  
ANISOU  341  N   LEU A  47     3438   4556   2025   -163    740    229       N  
ATOM    342  CA  LEU A  47      75.349 -23.455 -14.294  1.00 23.29           C  
ANISOU  342  CA  LEU A  47     3135   4117   1595   -126    571    262       C  
ATOM    343  C   LEU A  47      74.590 -22.731 -15.399  1.00 33.26           C  
ANISOU  343  C   LEU A  47     4488   5534   2615   -257    486    458       C  
ATOM    344  O   LEU A  47      74.787 -21.534 -15.624  1.00 37.95           O  
ANISOU  344  O   LEU A  47     5087   6129   3203   -327    454    691       O  
ATOM    345  CB  LEU A  47      74.878 -22.982 -12.920  1.00 25.88           C  
ANISOU  345  CB  LEU A  47     3441   4225   2169    -16    439    344       C  
ATOM    346  CG  LEU A  47      73.385 -23.063 -12.586  1.00 31.91           C  
ANISOU  346  CG  LEU A  47     4251   4920   2952     31    281    386       C  
ATOM    347  CD1 LEU A  47      72.883 -24.487 -12.754  1.00 30.77           C  
ANISOU  347  CD1 LEU A  47     4131   4813   2746     50    287    196       C  
ATOM    348  CD2 LEU A  47      73.140 -22.576 -11.159  1.00 25.71           C  
ANISOU  348  CD2 LEU A  47     3430   3944   2397    125    214    417       C  
ATOM    349  N   SER A  48      73.738 -23.471 -16.101  1.00 30.69           N  
ANISOU  349  N   SER A  48     4232   5318   2112   -298    429    370       N  
ATOM    350  CA  SER A  48      72.804 -22.913 -17.065  1.00 36.50           C  
ANISOU  350  CA  SER A  48     5042   6112   2713   -388    272    541       C  
ATOM    351  C   SER A  48      71.458 -22.750 -16.373  1.00 43.36           C  
ANISOU  351  C   SER A  48     5897   6875   3702   -307     69    645       C  
ATOM    352  O   SER A  48      70.927 -23.713 -15.810  1.00 38.80           O  
ANISOU  352  O   SER A  48     5304   6265   3174   -239     51    480       O  
ATOM    353  CB  SER A  48      72.678 -23.816 -18.291  1.00 44.47           C  
ANISOU  353  CB  SER A  48     6115   7282   3499   -483    314    365       C  
ATOM    354  OG  SER A  48      71.652 -23.356 -19.151  1.00 56.38           O  
ANISOU  354  OG  SER A  48     7681   8865   4877   -565    130    533       O  
ATOM    355  N   LEU A  49      70.913 -21.535 -16.406  1.00 45.69           N  
ANISOU  355  N   LEU A  49     6182   7092   4086   -310    -80    912       N  
ATOM    356  CA  LEU A  49      69.692 -21.272 -15.654  1.00 43.48           C  
ANISOU  356  CA  LEU A  49     5847   6686   3987   -209   -253   1006       C  
ATOM    357  C   LEU A  49      68.465 -21.845 -16.351  1.00 49.97           C  
ANISOU  357  C   LEU A  49     6681   7596   4710   -250   -402    977       C  
ATOM    358  O   LEU A  49      67.555 -22.353 -15.687  1.00 51.91           O  
ANISOU  358  O   LEU A  49     6869   7798   5057   -178   -483    916       O  
ATOM    359  CB  LEU A  49      69.528 -19.771 -15.424  1.00 37.63           C  
ANISOU  359  CB  LEU A  49     5063   5781   3453   -177   -356   1273       C  
ATOM    360  CG  LEU A  49      70.629 -19.134 -14.574  1.00 38.83           C  
ANISOU  360  CG  LEU A  49     5187   5784   3781   -133   -226   1272       C  
ATOM    361  CD1 LEU A  49      70.402 -17.640 -14.424  1.00 40.72           C  
ANISOU  361  CD1 LEU A  49     5387   5832   4251   -114   -340   1527       C  
ATOM    362  CD2 LEU A  49      70.686 -19.809 -13.220  1.00 31.84           C  
ANISOU  362  CD2 LEU A  49     4255   4766   3076     -3   -143   1023       C  
ATOM    363  N   GLY A  50      68.420 -21.780 -17.678  1.00 45.75           N  
ANISOU  363  N   GLY A  50     6209   7200   3973   -374   -441   1023       N  
ATOM    364  CA  GLY A  50      67.285 -22.280 -18.411  1.00 53.57           C  
ANISOU  364  CA  GLY A  50     7206   8292   4858   -431   -598   1005       C  
ATOM    365  C   GLY A  50      66.003 -21.566 -18.034  1.00 52.30           C  
ANISOU  365  C   GLY A  50     6941   8010   4919   -353   -818   1201       C  
ATOM    366  O   GLY A  50      66.011 -20.411 -17.595  1.00 53.84           O  
ANISOU  366  O   GLY A  50     7080   8050   5328   -281   -864   1397       O  
ATOM    367  N   PRO A  51      64.874 -22.248 -18.181  1.00 54.45           N  
ANISOU  367  N   PRO A  51     7169   8338   5183   -364   -952   1135       N  
ATOM    368  CA  PRO A  51      63.587 -21.584 -17.949  1.00 50.01           C  
ANISOU  368  CA  PRO A  51     6471   7672   4858   -290  -1163   1314       C  
ATOM    369  C   PRO A  51      63.108 -21.685 -16.507  1.00 35.44           C  
ANISOU  369  C   PRO A  51     4495   5669   3302   -142  -1150   1260       C  
ATOM    370  O   PRO A  51      62.293 -20.869 -16.071  1.00 38.42           O  
ANISOU  370  O   PRO A  51     4732   5901   3967    -39  -1263   1400       O  
ATOM    371  CB  PRO A  51      62.651 -22.326 -18.908  1.00 50.85           C  
ANISOU  371  CB  PRO A  51     6579   7945   4796   -400  -1312   1260       C  
ATOM    372  CG  PRO A  51      63.199 -23.726 -18.911  1.00 51.60           C  
ANISOU  372  CG  PRO A  51     6768   8149   4687   -470  -1159    959       C  
ATOM    373  CD  PRO A  51      64.702 -23.607 -18.724  1.00 55.87           C  
ANISOU  373  CD  PRO A  51     7407   8673   5148   -461   -927    893       C  
ATOM    374  N   ASN A  52      63.615 -22.659 -15.751  1.00 34.62           N  
ANISOU  374  N   ASN A  52     4423   5589   3142   -127  -1002   1052       N  
ATOM    375  CA  ASN A  52      63.082 -22.977 -14.431  1.00 33.28           C  
ANISOU  375  CA  ASN A  52     4141   5248   3255     -4   -929    918       C  
ATOM    376  C   ASN A  52      64.008 -22.628 -13.270  1.00 26.94           C  
ANISOU  376  C   ASN A  52     3358   4273   2607    101   -729    842       C  
ATOM    377  O   ASN A  52      63.616 -22.819 -12.116  1.00 27.24           O  
ANISOU  377  O   ASN A  52     3318   4185   2846    185   -651    734       O  
ATOM    378  CB  ASN A  52      62.729 -24.467 -14.360  1.00 40.96           C  
ANISOU  378  CB  ASN A  52     5131   6289   4144    -68   -890    682       C  
ATOM    379  CG  ASN A  52      63.961 -25.365 -14.378  1.00 57.40           C  
ANISOU  379  CG  ASN A  52     7355   8398   6057   -110   -702    481       C  
ATOM    380  ND2 ASN A  52      63.866 -26.526 -13.726  1.00 52.67           N  
ANISOU  380  ND2 ASN A  52     6754   7726   5533   -104   -615    280       N  
ATOM    381  OD1 ASN A  52      64.981 -25.025 -14.985  1.00 69.11           O  
ANISOU  381  OD1 ASN A  52     8933   9960   7365   -151   -637    515       O  
ATOM    382  N   ILE A  53      65.223 -22.151 -13.523  1.00 25.89           N  
ANISOU  382  N   ILE A  53     3320   4147   2369     79   -641    891       N  
ATOM    383  CA  ILE A  53      66.167 -21.838 -12.456  1.00 30.17           C  
ANISOU  383  CA  ILE A  53     3876   4542   3045    156   -476    815       C  
ATOM    384  C   ILE A  53      66.391 -20.334 -12.425  1.00 25.37           C  
ANISOU  384  C   ILE A  53     3236   3813   2592    195   -520   1011       C  
ATOM    385  O   ILE A  53      66.528 -19.698 -13.473  1.00 28.28           O  
ANISOU  385  O   ILE A  53     3638   4252   2854    121   -618   1217       O  
ATOM    386  CB  ILE A  53      67.510 -22.571 -12.629  1.00 33.60           C  
ANISOU  386  CB  ILE A  53     4412   5053   3300    103   -323    680       C  
ATOM    387  CG1 ILE A  53      67.301 -24.078 -12.754  1.00 41.13           C  
ANISOU  387  CG1 ILE A  53     5396   6085   4147     65   -289    479       C  
ATOM    388  CG2 ILE A  53      68.423 -22.261 -11.464  1.00 24.51           C  
ANISOU  388  CG2 ILE A  53     3251   3758   2303    176   -197    616       C  
ATOM    389  CD1 ILE A  53      68.600 -24.850 -12.928  1.00 46.08           C  
ANISOU  389  CD1 ILE A  53     6088   6754   4665     38   -134    321       C  
ATOM    390  N   GLU A  54      66.445 -19.767 -11.220  1.00 26.87           N  
ANISOU  390  N   GLU A  54     3367   3816   3024    295   -447    948       N  
ATOM    391  CA  GLU A  54      66.724 -18.350 -11.057  1.00 30.92           C  
ANISOU  391  CA  GLU A  54     3849   4162   3738    334   -472   1086       C  
ATOM    392  C   GLU A  54      67.644 -18.133  -9.865  1.00 27.85           C  
ANISOU  392  C   GLU A  54     3480   3655   3447    369   -320    930       C  
ATOM    393  O   GLU A  54      67.637 -18.904  -8.901  1.00 21.84           O  
ANISOU  393  O   GLU A  54     2719   2907   2672    398   -226    735       O  
ATOM    394  CB  GLU A  54      65.432 -17.538 -10.880  1.00 25.81           C  
ANISOU  394  CB  GLU A  54     3061   3367   3380    431   -598   1177       C  
ATOM    395  CG  GLU A  54      64.686 -17.820  -9.588  1.00 44.27           C  
ANISOU  395  CG  GLU A  54     5298   5620   5902    528   -505    956       C  
ATOM    396  CD  GLU A  54      63.376 -17.055  -9.501  1.00 54.18           C  
ANISOU  396  CD  GLU A  54     6370   6737   7477    634   -610   1021       C  
ATOM    397  OE1 GLU A  54      63.100 -16.249 -10.419  1.00 60.38           O  
ANISOU  397  OE1 GLU A  54     7111   7461   8369    642   -786   1267       O  
ATOM    398  OE2 GLU A  54      62.617 -17.270  -8.528  1.00 51.79           O1-
ANISOU  398  OE2 GLU A  54     5958   6394   7326    703   -517    837       O1-
ATOM    399  N  AILE A  55      68.451 -17.079  -9.952  0.75 24.93           N  
ANISOU  399  N  AILE A  55     3128   3175   3169    344   -312   1034       N  
ATOM    400  N  BILE A  55      68.431 -17.064  -9.938  0.25 24.36           N  
ANISOU  400  N  BILE A  55     3053   3099   3102    346   -313   1034       N  
ATOM    401  CA AILE A  55      69.304 -16.630  -8.859  0.75 19.96           C  
ANISOU  401  CA AILE A  55     2504   2419   2662    360   -205    900       C  
ATOM    402  CA BILE A  55      69.305 -16.638  -8.852  0.25 22.29           C  
ANISOU  402  CA BILE A  55     2798   2714   2955    360   -204    898       C  
ATOM    403  C  AILE A  55      68.724 -15.335  -8.319  0.75 24.02           C  
ANISOU  403  C  AILE A  55     2936   2687   3501    435   -247    917       C  
ATOM    404  C  BILE A  55      68.777 -15.319  -8.312  0.25 23.80           C  
ANISOU  404  C  BILE A  55     2912   2659   3473    432   -244    917       C  
ATOM    405  O  AILE A  55      68.433 -14.412  -9.091  0.75 24.39           O  
ANISOU  405  O  AILE A  55     2952   2625   3692    435   -360   1135       O  
ATOM    406  O  BILE A  55      68.573 -14.367  -9.076  0.25 25.40           O  
ANISOU  406  O  BILE A  55     3087   2748   3817    426   -352   1135       O  
ATOM    407  CB AILE A  55      70.756 -16.417  -9.315  0.75 26.42           C  
ANISOU  407  CB AILE A  55     3382   3282   3374    258   -149    971       C  
ATOM    408  CB BILE A  55      70.762 -16.493  -9.321  0.25 25.39           C  
ANISOU  408  CB BILE A  55     3254   3163   3230    257   -146    965       C  
ATOM    409  CG1AILE A  55      71.255 -17.618 -10.127  0.75 27.73           C  
ANISOU  409  CG1AILE A  55     3605   3685   3247    190   -100    955       C  
ATOM    410  CG1BILE A  55      71.244 -17.792  -9.968  0.25 26.53           C  
ANISOU  410  CG1BILE A  55     3452   3538   3091    200    -89    918       C  
ATOM    411  CG2AILE A  55      71.650 -16.114  -8.108  0.75 22.55           C  
ANISOU  411  CG2AILE A  55     2885   2687   2995    260    -63    809       C  
ATOM    412  CG2BILE A  55      71.656 -16.097  -8.155  0.25 23.82           C  
ANISOU  412  CG2BILE A  55     3046   2849   3154    258    -65    817       C  
ATOM    413  CD1AILE A  55      71.814 -18.738  -9.294  0.75 25.76           C  
ANISOU  413  CD1AILE A  55     3364   3495   2930    216     -2    738       C  
ATOM    414  CD1BILE A  55      72.566 -17.654 -10.674  0.25 26.56           C  
ANISOU  414  CD1BILE A  55     3484   3631   2977     93    -13    991       C  
ATOM    415  N   ILE A  56      68.559 -15.262  -7.001  1.00 25.66           N  
ANISOU  415  N   ILE A  56     3111   2806   3831    492   -157    688       N  
ATOM    416  CA  ILE A  56      67.976 -14.100  -6.346  1.00 27.53           C  
ANISOU  416  CA  ILE A  56     3258   2802   4399    572   -156    615       C  
ATOM    417  C   ILE A  56      68.999 -13.498  -5.392  1.00 29.28           C  
ANISOU  417  C   ILE A  56     3523   2914   4687    525    -69    453       C  
ATOM    418  O   ILE A  56      69.634 -14.217  -4.612  1.00 28.14           O  
ANISOU  418  O   ILE A  56     3440   2903   4350    473     13    294       O  
ATOM    419  CB  ILE A  56      66.678 -14.466  -5.610  1.00 30.08           C  
ANISOU  419  CB  ILE A  56     3481   3136   4811    665   -106    441       C  
ATOM    420  CG1 ILE A  56      65.660 -15.009  -6.611  1.00 34.45           C  
ANISOU  420  CG1 ILE A  56     3971   3793   5327    696   -224    612       C  
ATOM    421  CG2 ILE A  56      66.107 -13.251  -4.906  1.00 34.17           C  
ANISOU  421  CG2 ILE A  56     3886   3396   5701    757    -68    308       C  
ATOM    422  CD1 ILE A  56      64.511 -15.741  -5.963  1.00 38.66           C  
ANISOU  422  CD1 ILE A  56     4406   4409   5873    747   -159    448       C  
ATOM    423  N   HIS A  57      69.166 -12.186  -5.472  1.00 24.05           N  
ANISOU  423  N   HIS A  57     2825   2002   4313    533   -109    509       N  
ATOM    424  CA  HIS A  57      70.014 -11.423  -4.569  1.00 25.17           C  
ANISOU  424  CA  HIS A  57     2991   1996   4578    479    -44    332       C  
ATOM    425  C   HIS A  57      69.098 -10.567  -3.705  1.00 26.33           C  
ANISOU  425  C   HIS A  57     3043   1910   5050    579      6    108       C  
ATOM    426  O   HIS A  57      68.291  -9.797  -4.231  1.00 31.36           O  
ANISOU  426  O   HIS A  57     3582   2334   6000    675    -68    227       O  
ATOM    427  CB  HIS A  57      70.996 -10.562  -5.365  1.00 28.66           C  
ANISOU  427  CB  HIS A  57     3460   2303   5127    385   -117    556       C  
ATOM    428  CG  HIS A  57      72.007  -9.844  -4.526  1.00 38.13           C  
ANISOU  428  CG  HIS A  57     4680   3366   6442    296    -69    385       C  
ATOM    429  CD2 HIS A  57      72.716  -8.714  -4.764  1.00 38.71           C  
ANISOU  429  CD2 HIS A  57     4746   3206   6755    213   -111    480       C  
ATOM    430  ND1 HIS A  57      72.399 -10.289  -3.282  1.00 35.42           N  
ANISOU  430  ND1 HIS A  57     4370   3131   5958    262     17     88       N  
ATOM    431  CE1 HIS A  57      73.302  -9.461  -2.786  1.00 40.33           C  
ANISOU  431  CE1 HIS A  57     5000   3605   6719    163     18    -14       C  
ATOM    432  NE2 HIS A  57      73.512  -8.497  -3.665  1.00 41.10           N  
ANISOU  432  NE2 HIS A  57     5070   3481   7066    133    -52    212       N  
ATOM    433  N   GLU A  58      69.185 -10.735  -2.390  1.00 30.88           N  
ANISOU  433  N   GLU A  58     3640   2540   5553    557    132   -216       N  
ATOM    434  CA  GLU A  58      68.467  -9.885  -1.448  1.00 40.50           C  
ANISOU  434  CA  GLU A  58     4774   3556   7059    627    229   -509       C  
ATOM    435  C   GLU A  58      69.441  -9.361  -0.404  1.00 37.76           C  
ANISOU  435  C   GLU A  58     4502   3155   6691    510    295   -772       C  
ATOM    436  O   GLU A  58      70.560  -9.856  -0.272  1.00 36.59           O  
ANISOU  436  O   GLU A  58     4455   3174   6275    384    263   -731       O  
ATOM    437  CB  GLU A  58      67.322 -10.634  -0.758  1.00 45.33           C  
ANISOU  437  CB  GLU A  58     5323   4335   7566    695    352   -704       C  
ATOM    438  CG  GLU A  58      66.484 -11.469  -1.700  1.00 52.50           C  
ANISOU  438  CG  GLU A  58     6172   5377   8399    767    276   -461       C  
ATOM    439  CD  GLU A  58      65.175 -11.919  -1.075  1.00 68.79           C  
ANISOU  439  CD  GLU A  58     8115   7532  10491    842    400   -649       C  
ATOM    440  OE1 GLU A  58      64.106 -11.630  -1.656  1.00 73.72           O  
ANISOU  440  OE1 GLU A  58     8578   8043  11390    967    348   -556       O  
ATOM    441  OE2 GLU A  58      65.216 -12.572  -0.009  1.00 73.86           O1-
ANISOU  441  OE2 GLU A  58     8814   8369  10881    765    543   -871       O1-
ATOM    442  N   GLY A  59      69.008  -8.342   0.329  1.00 57.19           N  
ANISOU  442  N   GLY A  59     6896   5375   9459    551    380  -1058       N  
ATOM    443  CA  GLY A  59      69.796  -7.781   1.410  1.00 67.50           C  
ANISOU  443  CA  GLY A  59     8270   6629  10750    426    445  -1373       C  
ATOM    444  C   GLY A  59      71.212  -7.452   0.983  1.00 75.07           C  
ANISOU  444  C   GLY A  59     9305   7529  11688    290    319  -1198       C  
ATOM    445  O   GLY A  59      71.502  -7.195  -0.189  1.00 79.53           O  
ANISOU  445  O   GLY A  59     9851   7976  12392    305    203   -857       O  
ATOM    446  N   LEU A  60      72.122  -7.478   1.953  1.00 71.59           N  
ANISOU  446  N   LEU A  60     8946   7200  11053    136    340  -1426       N  
ATOM    447  CA  LEU A  60      73.512  -7.153   1.665  1.00 65.67           C  
ANISOU  447  CA  LEU A  60     8238   6406  10307    -10    228  -1295       C  
ATOM    448  C   LEU A  60      74.295  -8.351   1.147  1.00 58.64           C  
ANISOU  448  C   LEU A  60     7391   5827   9062    -63    155  -1020       C  
ATOM    449  O   LEU A  60      75.044  -8.225   0.172  1.00 58.04           O  
ANISOU  449  O   LEU A  60     7297   5706   9050   -106     76   -740       O  
ATOM    450  CB  LEU A  60      74.192  -6.594   2.916  1.00 67.78           C  
ANISOU  450  CB  LEU A  60     8553   6648  10551   -168    250  -1665       C  
ATOM    451  CG  LEU A  60      75.640  -6.141   2.740  1.00 64.77           C  
ANISOU  451  CG  LEU A  60     8185   6201  10225   -340    129  -1572       C  
ATOM    452  CD1 LEU A  60      75.719  -5.018   1.718  1.00 63.88           C  
ANISOU  452  CD1 LEU A  60     8005   5700  10564   -317     78  -1363       C  
ATOM    453  CD2 LEU A  60      76.219  -5.699   4.074  1.00 69.61           C  
ANISOU  453  CD2 LEU A  60     8848   6837  10764   -512    132  -1972       C  
ATOM    454  N   ASP A  61      74.128  -9.516   1.773  1.00 47.01           N  
ANISOU  454  N   ASP A  61     5967   4663   7233    -66    190  -1094       N  
ATOM    455  CA  ASP A  61      74.943 -10.679   1.462  1.00 40.50           C  
ANISOU  455  CA  ASP A  61     5172   4104   6114   -113    121   -889       C  
ATOM    456  C   ASP A  61      74.130 -11.908   1.081  1.00 29.36           C  
ANISOU  456  C   ASP A  61     3770   2888   4499     -5    154   -754       C  
ATOM    457  O   ASP A  61      74.712 -12.981   0.906  1.00 32.35           O  
ANISOU  457  O   ASP A  61     4168   3470   4652    -29    108   -620       O  
ATOM    458  CB  ASP A  61      75.852 -11.020   2.654  1.00 53.88           C  
ANISOU  458  CB  ASP A  61     6917   5981   7575   -261     74  -1069       C  
ATOM    459  CG  ASP A  61      75.130 -10.948   3.988  1.00 70.55           C  
ANISOU  459  CG  ASP A  61     9086   8167   9554   -295    159  -1399       C  
ATOM    460  OD1 ASP A  61      73.984 -11.447   4.081  1.00 78.96           O  
ANISOU  460  OD1 ASP A  61    10155   9306  10540   -197    260  -1429       O  
ATOM    461  OD2 ASP A  61      75.719 -10.406   4.951  1.00 72.30           O1-
ANISOU  461  OD2 ASP A  61     9343   8393   9733   -439    130  -1638       O1-
ATOM    462  N   TYR A  62      72.814 -11.785   0.936  1.00 28.28           N  
ANISOU  462  N   TYR A  62     3599   2677   4469    113    227   -792       N  
ATOM    463  CA  TYR A  62      71.939 -12.938   0.782  1.00 24.87           C  
ANISOU  463  CA  TYR A  62     3168   2432   3850    190    264   -718       C  
ATOM    464  C   TYR A  62      71.702 -13.254  -0.691  1.00 30.19           C  
ANISOU  464  C   TYR A  62     3806   3089   4576    270    202   -420       C  
ATOM    465  O   TYR A  62      71.318 -12.378  -1.472  1.00 31.45           O  
ANISOU  465  O   TYR A  62     3909   3049   4991    329    170   -311       O  
ATOM    466  CB  TYR A  62      70.615 -12.674   1.491  1.00 26.67           C  
ANISOU  466  CB  TYR A  62     3351   2621   4163    257    387   -944       C  
ATOM    467  CG  TYR A  62      69.621 -13.810   1.436  1.00 38.17           C  
ANISOU  467  CG  TYR A  62     4788   4262   5452    314    436   -887       C  
ATOM    468  CD1 TYR A  62      69.588 -14.783   2.428  1.00 43.85           C  
ANISOU  468  CD1 TYR A  62     5574   5221   5865    229    492   -986       C  
ATOM    469  CD2 TYR A  62      68.694 -13.892   0.398  1.00 43.22           C  
ANISOU  469  CD2 TYR A  62     5339   4835   6246    433    410   -717       C  
ATOM    470  CE1 TYR A  62      68.663 -15.811   2.382  1.00 51.08           C  
ANISOU  470  CE1 TYR A  62     6467   6284   6657    260    540   -923       C  
ATOM    471  CE2 TYR A  62      67.771 -14.909   0.340  1.00 50.71           C  
ANISOU  471  CE2 TYR A  62     6257   5942   7068    467    447   -677       C  
ATOM    472  CZ  TYR A  62      67.759 -15.870   1.331  1.00 57.89           C  
ANISOU  472  CZ  TYR A  62     7231   7067   7696    380    521   -783       C  
ATOM    473  OH  TYR A  62      66.833 -16.885   1.272  1.00 61.61           O  
ANISOU  473  OH  TYR A  62     7666   7677   8066    393    560   -730       O  
ATOM    474  N   TYR A  63      71.917 -14.514  -1.056  1.00 22.90           N  
ANISOU  474  N   TYR A  63     2917   2374   3412    263    178   -291       N  
ATOM    475  CA  TYR A  63      71.648 -15.035  -2.390  1.00 22.70           C  
ANISOU  475  CA  TYR A  63     2875   2395   3356    314    133    -58       C  
ATOM    476  C   TYR A  63      70.846 -16.321  -2.257  1.00 27.66           C  
ANISOU  476  C   TYR A  63     3513   3194   3803    351    159    -72       C  
ATOM    477  O   TYR A  63      71.060 -17.109  -1.332  1.00 31.17           O  
ANISOU  477  O   TYR A  63     4000   3763   4080    307    188   -175       O  
ATOM    478  CB  TYR A  63      72.943 -15.324  -3.167  1.00 20.27           C  
ANISOU  478  CB  TYR A  63     2590   2158   2955    246     90     98       C  
ATOM    479  CG  TYR A  63      73.757 -14.098  -3.469  1.00 24.54           C  
ANISOU  479  CG  TYR A  63     3109   2536   3679    182     64    160       C  
ATOM    480  CD1 TYR A  63      74.636 -13.564  -2.529  1.00 24.85           C  
ANISOU  480  CD1 TYR A  63     3150   2517   3776    100     64     14       C  
ATOM    481  CD2 TYR A  63      73.646 -13.465  -4.698  1.00 28.81           C  
ANISOU  481  CD2 TYR A  63     3629   2985   4331    181     26    381       C  
ATOM    482  CE1 TYR A  63      75.382 -12.427  -2.818  1.00 29.46           C  
ANISOU  482  CE1 TYR A  63     3705   2929   4557     21     38     72       C  
ATOM    483  CE2 TYR A  63      74.382 -12.339  -4.995  1.00 28.57           C  
ANISOU  483  CE2 TYR A  63     3580   2790   4485    100      2    473       C  
ATOM    484  CZ  TYR A  63      75.250 -11.826  -4.059  1.00 35.45           C  
ANISOU  484  CZ  TYR A  63     4444   3581   5445     22     14    311       C  
ATOM    485  OH  TYR A  63      75.975 -10.701  -4.378  1.00 39.64           O  
ANISOU  485  OH  TYR A  63     4947   3927   6186    -77    -12    407       O  
ATOM    486  N   ALA A  64      69.911 -16.528  -3.178  1.00 26.34           N  
ANISOU  486  N   ALA A  64     3303   3030   3674    417    130     48       N  
ATOM    487  CA  ALA A  64      69.129 -17.754  -3.195  1.00 23.54           C  
ANISOU  487  CA  ALA A  64     2948   2820   3175    435    144     45       C  
ATOM    488  C   ALA A  64      69.130 -18.350  -4.592  1.00 24.57           C  
ANISOU  488  C   ALA A  64     3088   3027   3220    436     71    225       C  
ATOM    489  O   ALA A  64      69.090 -17.627  -5.590  1.00 32.28           O  
ANISOU  489  O   ALA A  64     4043   3940   4283    446      6    371       O  
ATOM    490  CB  ALA A  64      67.682 -17.521  -2.734  1.00 20.22           C  
ANISOU  490  CB  ALA A  64     2436   2359   2885    498    193    -53       C  
ATOM    491  N  ALEU A  65      69.162 -19.678  -4.646  0.40 25.63           N  
ANISOU  491  N  ALEU A  65     3260   3295   3182    411     79    213       N  
ATOM    492  N  BLEU A  65      69.219 -19.673  -4.655  0.60 25.75           N  
ANISOU  492  N  BLEU A  65     3279   3311   3196    410     79    215       N  
ATOM    493  CA ALEU A  65      69.079 -20.445  -5.882  0.40 24.46           C  
ANISOU  493  CA ALEU A  65     3129   3242   2923    397     30    314       C  
ATOM    494  CA BLEU A  65      69.068 -20.423  -5.892  0.60 24.31           C  
ANISOU  494  CA BLEU A  65     3109   3221   2906    398     29    316       C  
ATOM    495  C  ALEU A  65      67.759 -21.209  -5.856  0.40 23.38           C  
ANISOU  495  C  ALEU A  65     2951   3156   2776    413     13    283       C  
ATOM    496  C  BLEU A  65      67.737 -21.158  -5.818  0.60 23.15           C  
ANISOU  496  C  BLEU A  65     2920   3122   2755    415     14    282       C  
ATOM    497  O  ALEU A  65      67.589 -22.137  -5.058  0.40 24.71           O  
ANISOU  497  O  ALEU A  65     3137   3365   2889    393     59    196       O  
ATOM    498  O  BLEU A  65      67.546 -22.018  -4.953  0.60 25.06           O  
ANISOU  498  O  BLEU A  65     3175   3400   2947    397     63    190       O  
ATOM    499  CB ALEU A  65      70.270 -21.393  -6.006  0.40 25.37           C  
ANISOU  499  CB ALEU A  65     3302   3434   2903    356     59    290       C  
ATOM    500  CB BLEU A  65      70.223 -21.403  -6.094  0.60 25.48           C  
ANISOU  500  CB BLEU A  65     3315   3451   2914    356     56    296       C  
ATOM    501  CG ALEU A  65      70.228 -22.404  -7.150  0.40 27.79           C  
ANISOU  501  CG ALEU A  65     3633   3845   3082    332     44    313       C  
ATOM    502  CG BLEU A  65      70.394 -22.027  -7.483  0.60 27.64           C  
ANISOU  502  CG BLEU A  65     3613   3827   3063    325     39    353       C  
ATOM    503  CD1ALEU A  65      70.084 -21.683  -8.464  0.40 27.71           C  
ANISOU  503  CD1ALEU A  65     3622   3877   3029    303     -2    442       C  
ATOM    504  CD1BLEU A  65      71.834 -22.457  -7.682  0.60 29.06           C  
ANISOU  504  CD1BLEU A  65     3809   4046   3186    298    100    319       C  
ATOM    505  CD2ALEU A  65      71.475 -23.280  -7.149  0.40 27.90           C  
ANISOU  505  CD2ALEU A  65     3669   3893   3038    317     96    251       C  
ATOM    506  CD2BLEU A  65      69.467 -23.217  -7.677  0.60 25.22           C  
ANISOU  506  CD2BLEU A  65     3312   3580   2692    321     15    297       C  
ATOM    507  N   HIS A  66      66.828 -20.818  -6.720  1.00 21.93           N  
ANISOU  507  N   HIS A  66     2706   2970   2656    435    -68    377       N  
ATOM    508  CA  HIS A  66      65.476 -21.356  -6.726  1.00 21.69           C  
ANISOU  508  CA  HIS A  66     2595   2981   2666    446   -100    355       C  
ATOM    509  C   HIS A  66      65.258 -22.164  -7.996  1.00 20.10           C  
ANISOU  509  C   HIS A  66     2421   2898   2318    390   -197    426       C  
ATOM    510  O   HIS A  66      65.531 -21.678  -9.098  1.00 22.53           O  
ANISOU  510  O   HIS A  66     2755   3242   2564    367   -281    554       O  
ATOM    511  CB  HIS A  66      64.459 -20.208  -6.623  1.00 26.97           C  
ANISOU  511  CB  HIS A  66     3127   3544   3578    524   -139    392       C  
ATOM    512  CG  HIS A  66      63.055 -20.651  -6.360  1.00 40.85           C  
ANISOU  512  CG  HIS A  66     4751   5336   5434    542   -142    339       C  
ATOM    513  CD2 HIS A  66      62.428 -21.001  -5.211  1.00 44.32           C  
ANISOU  513  CD2 HIS A  66     5124   5788   5930    542    -15    190       C  
ATOM    514  ND1 HIS A  66      62.109 -20.753  -7.358  1.00 44.03           N  
ANISOU  514  ND1 HIS A  66     5058   5786   5884    544   -289    454       N  
ATOM    515  CE1 HIS A  66      60.963 -21.154  -6.836  1.00 46.92           C  
ANISOU  515  CE1 HIS A  66     5284   6176   6366    553   -252    371       C  
ATOM    516  NE2 HIS A  66      61.129 -21.310  -5.535  1.00 43.47           N  
ANISOU  516  NE2 HIS A  66     4865   5722   5931    549    -71    210       N  
ATOM    517  N   ILE A  67      64.764 -23.390  -7.843  1.00 26.54           N  
ANISOU  517  N   ILE A  67     3237   3778   3070    348   -184    342       N  
ATOM    518  CA  ILE A  67      64.346 -24.217  -8.969  1.00 25.06           C  
ANISOU  518  CA  ILE A  67     3064   3697   2760    279   -279    357       C  
ATOM    519  C   ILE A  67      62.868 -24.528  -8.809  1.00 26.74           C  
ANISOU  519  C   ILE A  67     3148   3926   3086    269   -339    346       C  
ATOM    520  O   ILE A  67      62.441 -25.004  -7.752  1.00 28.85           O  
ANISOU  520  O   ILE A  67     3370   4156   3435    267   -249    261       O  
ATOM    521  CB  ILE A  67      65.153 -25.522  -9.065  1.00 24.18           C  
ANISOU  521  CB  ILE A  67     3058   3618   2510    222   -218    244       C  
ATOM    522  CG1 ILE A  67      66.642 -25.259  -8.869  1.00 25.69           C  
ANISOU  522  CG1 ILE A  67     3328   3777   2656    248   -130    233       C  
ATOM    523  CG2 ILE A  67      64.922 -26.192 -10.406  1.00 24.24           C  
ANISOU  523  CG2 ILE A  67     3101   3743   2366    137   -303    220       C  
ATOM    524  CD1 ILE A  67      67.472 -26.511  -9.009  1.00 20.16           C  
ANISOU  524  CD1 ILE A  67     2694   3081   1884    218    -72    117       C  
ATOM    525  N   ARG A  68      62.092 -24.270  -9.856  1.00 25.07           N  
ANISOU  525  N   ARG A  68     2869   3786   2871    245   -497    444       N  
ATOM    526  CA  ARG A  68      60.709 -24.714  -9.915  1.00 32.65           C  
ANISOU  526  CA  ARG A  68     3686   4787   3935    213   -584    432       C  
ATOM    527  C   ARG A  68      60.568 -25.784 -10.992  1.00 30.51           C  
ANISOU  527  C   ARG A  68     3478   4644   3471     86   -693    392       C  
ATOM    528  O   ARG A  68      61.430 -25.930 -11.863  1.00 29.45           O  
ANISOU  528  O   ARG A  68     3483   4584   3122     34   -713    392       O  
ATOM    529  CB  ARG A  68      59.760 -23.536 -10.176  1.00 35.99           C  
ANISOU  529  CB  ARG A  68     3930   5176   4567    291   -714    576       C  
ATOM    530  CG  ARG A  68      60.092 -22.686 -11.394  1.00 43.07           C  
ANISOU  530  CG  ARG A  68     4874   6115   5377    286   -886    774       C  
ATOM    531  CD  ARG A  68      58.971 -21.677 -11.662  1.00 48.56           C  
ANISOU  531  CD  ARG A  68     5358   6752   6341    366  -1064    945       C  
ATOM    532  NE  ARG A  68      57.677 -22.348 -11.698  1.00 55.08           N  
ANISOU  532  NE  ARG A  68     6009   7650   7268    330  -1156    899       N  
ATOM    533  CZ  ARG A  68      57.129 -22.847 -12.801  1.00 62.03           C  
ANISOU  533  CZ  ARG A  68     6873   8689   8007    217  -1375    981       C  
ATOM    534  NH1 ARG A  68      57.755 -22.730 -13.969  1.00 64.02           N1+
ANISOU  534  NH1 ARG A  68     7285   9064   7976    125  -1511   1112       N1+
ATOM    535  NH2 ARG A  68      55.953 -23.460 -12.735  1.00 57.20           N  
ANISOU  535  NH2 ARG A  68     6080   8133   7522    175  -1454    926       N  
ATOM    536  N   ASP A  69      59.477 -26.548 -10.910  1.00 26.43           N  
ANISOU  536  N   ASP A  69     2853   4157   3034     21   -748    334       N  
ATOM    537  CA  ASP A  69      59.238 -27.663 -11.826  1.00 28.57           C  
ANISOU  537  CA  ASP A  69     3176   4531   3149   -120   -851    248       C  
ATOM    538  C   ASP A  69      60.479 -28.547 -11.943  1.00 21.99           C  
ANISOU  538  C   ASP A  69     2539   3675   2140   -162   -730    104       C  
ATOM    539  O   ASP A  69      60.926 -28.874 -13.043  1.00 24.30           O  
ANISOU  539  O   ASP A  69     2938   4074   2221   -242   -788     47       O  
ATOM    540  CB  ASP A  69      58.824 -27.163 -13.216  1.00 37.08           C  
ANISOU  540  CB  ASP A  69     4231   5764   4092   -180  -1083    370       C  
ATOM    541  CG  ASP A  69      57.541 -26.348 -13.206  1.00 55.75           C  
ANISOU  541  CG  ASP A  69     6363   8135   6684   -129  -1247    529       C  
ATOM    542  OD1 ASP A  69      56.818 -26.359 -12.184  1.00 61.36           O  
ANISOU  542  OD1 ASP A  69     6910   8751   7655    -69  -1161    491       O  
ATOM    543  OD2 ASP A  69      57.262 -25.694 -14.239  1.00 57.76           O1-
ANISOU  543  OD2 ASP A  69     6589   8497   6859   -156  -1465    700       O1-
ATOM    544  N  ATHR A  70      61.046 -28.923 -10.792  0.70 24.25           N  
ANISOU  544  N  ATHR A  70     2865   3829   2521   -110   -562     44       N  
ATOM    545  N  BTHR A  70      61.035 -28.933 -10.799  0.30 25.28           N  
ANISOU  545  N  BTHR A  70     2994   3960   2650   -111   -563     43       N  
ATOM    546  CA ATHR A  70      62.295 -29.681 -10.795  0.70 26.99           C  
ANISOU  546  CA ATHR A  70     3362   4119   2774   -115   -455    -72       C  
ATOM    547  CA BTHR A  70      62.307 -29.644 -10.795  0.30 26.26           C  
ANISOU  547  CA BTHR A  70     3269   4027   2680   -113   -455    -68       C  
ATOM    548  C  ATHR A  70      62.140 -30.973 -11.581  0.70 27.73           C  
ANISOU  548  C  ATHR A  70     3508   4230   2799   -236   -502   -237       C  
ATOM    549  C  BTHR A  70      62.182 -30.998 -11.492  0.30 26.87           C  
ANISOU  549  C  BTHR A  70     3400   4109   2699   -231   -492   -238       C  
ATOM    550  O  ATHR A  70      61.087 -31.617 -11.561  0.70 25.06           O  
ANISOU  550  O  ATHR A  70     3094   3884   2544   -325   -578   -275       O  
ATOM    551  O  BTHR A  70      61.184 -31.707 -11.337  0.30 26.63           O  
ANISOU  551  O  BTHR A  70     3297   4051   2768   -314   -551   -278       O  
ATOM    552  CB ATHR A  70      62.762 -30.019  -9.375  0.70 26.14           C  
ANISOU  552  CB ATHR A  70     3270   3867   2796    -62   -318    -78       C  
ATOM    553  CB BTHR A  70      62.798 -29.819  -9.358  0.30 25.06           C  
ANISOU  553  CB BTHR A  70     3128   3736   2655    -49   -316    -61       C  
ATOM    554  CG2ATHR A  70      63.205 -28.768  -8.627  0.70 22.87           C  
ANISOU  554  CG2ATHR A  70     2838   3437   2416     44   -252     27       C  
ATOM    555  CG2BTHR A  70      64.280 -30.081  -9.339  0.30 22.54           C  
ANISOU  555  CG2BTHR A  70     2926   3361   2277     -4   -228   -118       C  
ATOM    556  OG1ATHR A  70      61.707 -30.676  -8.660  0.70 21.03           O  
ANISOU  556  OG1ATHR A  70     2537   3174   2281   -127   -318    -82       O  
ATOM    557  OG1BTHR A  70      62.537 -28.618  -8.618  0.30 25.45           O  
ANISOU  557  OG1BTHR A  70     3101   3785   2784     32   -286     49       O  
ATOM    558  N   LEU A  71      63.199 -31.343 -12.279  1.00 25.69           N  
ANISOU  558  N   LEU A  71     3367   3991   2403   -247   -447   -358       N  
ATOM    559  CA  LEU A  71      63.259 -32.560 -13.059  1.00 29.55           C  
ANISOU  559  CA  LEU A  71     3920   4478   2832   -353   -457   -578       C  
ATOM    560  C   LEU A  71      64.351 -33.473 -12.519  1.00 26.36           C  
ANISOU  560  C   LEU A  71     3577   3883   2554   -296   -313   -710       C  
ATOM    561  O   LEU A  71      65.318 -32.999 -11.912  1.00 25.03           O  
ANISOU  561  O   LEU A  71     3422   3660   2427   -183   -216   -632       O  
ATOM    562  CB  LEU A  71      63.547 -32.231 -14.532  1.00 28.62           C  
ANISOU  562  CB  LEU A  71     3873   4577   2423   -433   -504   -648       C  
ATOM    563  CG  LEU A  71      62.559 -31.329 -15.266  1.00 34.64           C  
ANISOU  563  CG  LEU A  71     4581   5542   3038   -502   -696   -482       C  
ATOM    564  CD1 LEU A  71      63.074 -31.025 -16.663  1.00 43.63           C  
ANISOU  564  CD1 LEU A  71     5825   6916   3836   -603   -724   -525       C  
ATOM    565  CD2 LEU A  71      61.187 -31.981 -15.333  1.00 33.28           C  
ANISOU  565  CD2 LEU A  71     4316   5374   2955   -611   -853   -526       C  
ATOM    566  N   PRO A  72      64.239 -34.791 -12.727  1.00 25.52           N  
ANISOU  566  N   PRO A  72     3497   3655   2544   -371   -310   -908       N  
ATOM    567  CA  PRO A  72      65.344 -35.687 -12.339  1.00 29.36           C  
ANISOU  567  CA  PRO A  72     4025   3930   3200   -300   -191  -1035       C  
ATOM    568  C   PRO A  72      66.711 -35.192 -12.786  1.00 30.11           C  
ANISOU  568  C   PRO A  72     4157   4097   3187   -208    -69  -1094       C  
ATOM    569  O   PRO A  72      67.676 -35.294 -12.022  1.00 33.22           O  
ANISOU  569  O   PRO A  72     4534   4346   3741    -93     11  -1050       O  
ATOM    570  CB  PRO A  72      64.966 -37.011 -13.017  1.00 30.79           C  
ANISOU  570  CB  PRO A  72     4235   4010   3455   -418   -220  -1300       C  
ATOM    571  CG  PRO A  72      63.477 -36.969 -13.077  1.00 34.65           C  
ANISOU  571  CG  PRO A  72     4670   4582   3914   -550   -368  -1226       C  
ATOM    572  CD  PRO A  72      63.105 -35.530 -13.308  1.00 26.79           C  
ANISOU  572  CD  PRO A  72     3637   3840   2703   -525   -430  -1027       C  
ATOM    573  N   GLU A  73      66.801 -34.608 -13.984  1.00 27.18           N  
ANISOU  573  N   GLU A  73     3824   3963   2538   -270    -62  -1167       N  
ATOM    574  CA  GLU A  73      68.057 -34.086 -14.515  1.00 32.89           C  
ANISOU  574  CA  GLU A  73     4572   4794   3131   -218     76  -1218       C  
ATOM    575  C   GLU A  73      68.673 -32.998 -13.638  1.00 35.24           C  
ANISOU  575  C   GLU A  73     4827   5076   3485    -98    106   -969       C  
ATOM    576  O   GLU A  73      69.877 -32.741 -13.746  1.00 35.53           O  
ANISOU  576  O   GLU A  73     4852   5129   3518    -36    234  -1005       O  
ATOM    577  CB  GLU A  73      67.830 -33.528 -15.923  1.00 36.60           C  
ANISOU  577  CB  GLU A  73     5102   5567   3237   -352     52  -1269       C  
ATOM    578  CG  GLU A  73      67.431 -34.558 -16.971  1.00 46.02           C  
ANISOU  578  CG  GLU A  73     6354   6830   4303   -499     41  -1579       C  
ATOM    579  CD  GLU A  73      65.932 -34.805 -17.029  1.00 50.84           C  
ANISOU  579  CD  GLU A  73     6953   7461   4904   -613   -170  -1531       C  
ATOM    580  OE1 GLU A  73      65.209 -34.364 -16.115  1.00 47.28           O  
ANISOU  580  OE1 GLU A  73     6429   6924   4610   -557   -277  -1282       O  
ATOM    581  OE2 GLU A  73      65.475 -35.460 -17.987  1.00 52.57           O1-
ANISOU  581  OE2 GLU A  73     7220   7764   4992   -753   -220  -1732       O1-
ATOM    582  N   ASP A  74      67.878 -32.339 -12.794  1.00 33.62           N  
ANISOU  582  N   ASP A  74     4589   4847   3339    -75      2   -741       N  
ATOM    583  CA  ASP A  74      68.394 -31.290 -11.920  1.00 32.27           C  
ANISOU  583  CA  ASP A  74     4384   4653   3222     21     27   -542       C  
ATOM    584  C   ASP A  74      69.167 -31.839 -10.732  1.00 25.00           C  
ANISOU  584  C   ASP A  74     3437   3534   2527    115     82   -537       C  
ATOM    585  O   ASP A  74      69.824 -31.060 -10.037  1.00 22.24           O  
ANISOU  585  O   ASP A  74     3065   3172   2214    183    108   -414       O  
ATOM    586  CB  ASP A  74      67.250 -30.407 -11.412  1.00 30.81           C  
ANISOU  586  CB  ASP A  74     4159   4504   3044     16    -82   -348       C  
ATOM    587  CG  ASP A  74      66.650 -29.544 -12.510  1.00 40.38           C  
ANISOU  587  CG  ASP A  74     5375   5906   4062    -52   -173   -268       C  
ATOM    588  OD1 ASP A  74      67.427 -28.905 -13.254  1.00 46.69           O  
ANISOU  588  OD1 ASP A  74     6213   6819   4708    -66   -128   -240       O  
ATOM    589  OD2 ASP A  74      65.406 -29.518 -12.638  1.00 31.75           O1-
ANISOU  589  OD2 ASP A  74     4235   4853   2976   -103   -297   -218       O1-
ATOM    590  N   THR A  75      69.069 -33.137 -10.462  1.00 20.97           N  
ANISOU  590  N   THR A  75     2929   2860   2179    108     76   -649       N  
ATOM    591  CA  THR A  75      69.895 -33.769  -9.441  1.00 23.61           C  
ANISOU  591  CA  THR A  75     3237   2996   2739    191     97   -618       C  
ATOM    592  C   THR A  75      71.367 -33.505  -9.719  1.00 21.74           C  
ANISOU  592  C   THR A  75     2960   2772   2527    278    197   -681       C  
ATOM    593  O   THR A  75      71.820 -33.611 -10.861  1.00 26.58           O  
ANISOU  593  O   THR A  75     3572   3473   3052    262    291   -864       O  
ATOM    594  CB  THR A  75      69.643 -35.282  -9.433  1.00 27.37           C  
ANISOU  594  CB  THR A  75     3719   3267   3414    163     74   -749       C  
ATOM    595  CG2 THR A  75      70.619 -35.999  -8.501  1.00 28.70           C  
ANISOU  595  CG2 THR A  75     3848   3207   3851    258     69   -694       C  
ATOM    596  OG1 THR A  75      68.296 -35.547  -9.026  1.00 25.66           O  
ANISOU  596  OG1 THR A  75     3517   3031   3201     66    -14   -665       O  
ATOM    597  N   GLY A  76      72.113 -33.159  -8.679  1.00 21.19           N  
ANISOU  597  N   GLY A  76     2849   2636   2565    352    180   -538       N  
ATOM    598  CA  GLY A  76      73.552 -33.046  -8.800  1.00 27.77           C  
ANISOU  598  CA  GLY A  76     3606   3454   3491    436    259   -590       C  
ATOM    599  C   GLY A  76      74.128 -32.138  -7.730  1.00 24.58           C  
ANISOU  599  C   GLY A  76     3168   3068   3104    474    209   -396       C  
ATOM    600  O   GLY A  76      73.437 -31.723  -6.800  1.00 21.63           O  
ANISOU  600  O   GLY A  76     2840   2701   2678    439    124   -242       O  
ATOM    601  N   TYR A  77      75.416 -31.838  -7.894  1.00 20.54           N  
ANISOU  601  N   TYR A  77     2564   2575   2666    532    275   -430       N  
ATOM    602  CA  TYR A  77      76.173 -31.024  -6.949  1.00 20.20           C  
ANISOU  602  CA  TYR A  77     2469   2546   2661    557    220   -278       C  
ATOM    603  C   TYR A  77      76.249 -29.594  -7.471  1.00 20.10           C  
ANISOU  603  C   TYR A  77     2470   2708   2460    502    285   -243       C  
ATOM    604  O   TYR A  77      76.742 -29.357  -8.582  1.00 28.68           O  
ANISOU  604  O   TYR A  77     3521   3896   3482    485    410   -342       O  
ATOM    605  CB  TYR A  77      77.575 -31.599  -6.730  1.00 19.12           C  
ANISOU  605  CB  TYR A  77     2185   2302   2777    651    225   -318       C  
ATOM    606  CG  TYR A  77      77.550 -32.983  -6.122  1.00 28.81           C  
ANISOU  606  CG  TYR A  77     3389   3308   4248    712    125   -303       C  
ATOM    607  CD1 TYR A  77      77.397 -34.105  -6.923  1.00 22.23           C  
ANISOU  607  CD1 TYR A  77     2542   2355   3551    749    198   -494       C  
ATOM    608  CD2 TYR A  77      77.642 -33.167  -4.745  1.00 31.18           C  
ANISOU  608  CD2 TYR A  77     3693   3518   4635    715    -52    -94       C  
ATOM    609  CE1 TYR A  77      77.351 -35.371  -6.378  1.00 31.82           C  
ANISOU  609  CE1 TYR A  77     3735   3320   5037    801     95   -465       C  
ATOM    610  CE2 TYR A  77      77.608 -34.443  -4.191  1.00 25.79           C  
ANISOU  610  CE2 TYR A  77     2996   2617   4187    756   -166    -28       C  
ATOM    611  CZ  TYR A  77      77.461 -35.537  -5.015  1.00 27.44           C  
ANISOU  611  CZ  TYR A  77     3179   2664   4581    806    -94   -208       C  
ATOM    612  OH  TYR A  77      77.405 -36.808  -4.492  1.00 40.56           O  
ANISOU  612  OH  TYR A  77     4825   4062   6524    844   -215   -132       O  
ATOM    613  N   TYR A  78      75.760 -28.655  -6.671  1.00 23.52           N  
ANISOU  613  N   TYR A  78     2955   3172   2811    465    208   -105       N  
ATOM    614  CA  TYR A  78      75.730 -27.238  -7.007  1.00 20.13           C  
ANISOU  614  CA  TYR A  78     2540   2848   2261    415    241    -44       C  
ATOM    615  C   TYR A  78      76.804 -26.520  -6.206  1.00 26.92           C  
ANISOU  615  C   TYR A  78     3328   3691   3209    418    210     20       C  
ATOM    616  O   TYR A  78      76.830 -26.617  -4.975  1.00 25.19           O  
ANISOU  616  O   TYR A  78     3116   3414   3041    425    109     75       O  
ATOM    617  CB  TYR A  78      74.351 -26.652  -6.711  1.00 17.13           C  
ANISOU  617  CB  TYR A  78     2246   2485   1779    378    184     26       C  
ATOM    618  CG  TYR A  78      73.294 -27.159  -7.659  1.00 19.46           C  
ANISOU  618  CG  TYR A  78     2589   2825   1980    352    195    -23       C  
ATOM    619  CD1 TYR A  78      72.721 -28.414  -7.494  1.00 24.15           C  
ANISOU  619  CD1 TYR A  78     3203   3353   2618    358    167    -88       C  
ATOM    620  CD2 TYR A  78      72.897 -26.392  -8.745  1.00 22.67           C  
ANISOU  620  CD2 TYR A  78     3019   3339   2257    304    214      9       C  
ATOM    621  CE1 TYR A  78      71.756 -28.878  -8.379  1.00 29.27           C  
ANISOU  621  CE1 TYR A  78     3888   4049   3184    314    161   -152       C  
ATOM    622  CE2 TYR A  78      71.933 -26.842  -9.626  1.00 25.64           C  
ANISOU  622  CE2 TYR A  78     3435   3782   2527    262    191    -31       C  
ATOM    623  CZ  TYR A  78      71.365 -28.082  -9.435  1.00 29.47           C  
ANISOU  623  CZ  TYR A  78     3933   4207   3057    265    166   -128       C  
ATOM    624  OH  TYR A  78      70.415 -28.516 -10.326  1.00 27.30           O  
ANISOU  624  OH  TYR A  78     3690   4005   2677    202    128   -184       O  
ATOM    625  N   ARG A  79      77.683 -25.798  -6.895  1.00 21.93           N  
ANISOU  625  N   ARG A  79     2629   3126   2579    391    293     15       N  
ATOM    626  CA  ARG A  79      78.796 -25.116  -6.247  1.00 20.19           C  
ANISOU  626  CA  ARG A  79     2315   2892   2464    376    263     62       C  
ATOM    627  C   ARG A  79      78.681 -23.612  -6.461  1.00 21.63           C  
ANISOU  627  C   ARG A  79     2530   3109   2580    295    281    140       C  
ATOM    628  O   ARG A  79      78.299 -23.151  -7.543  1.00 22.48           O  
ANISOU  628  O   ARG A  79     2677   3281   2582    251    358    169       O  
ATOM    629  CB  ARG A  79      80.154 -25.638  -6.776  1.00 21.14           C  
ANISOU  629  CB  ARG A  79     2274   3033   2726    409    353    -14       C  
ATOM    630  CG  ARG A  79      81.364 -24.875  -6.215  1.00 23.00           C  
ANISOU  630  CG  ARG A  79     2377   3270   3090    375    317     38       C  
ATOM    631  CD  ARG A  79      82.695 -25.492  -6.629  1.00 29.64           C  
ANISOU  631  CD  ARG A  79     3011   4126   4126    424    404    -45       C  
ATOM    632  NE  ARG A  79      82.853 -26.856  -6.136  1.00 32.30           N  
ANISOU  632  NE  ARG A  79     3285   4353   4635    542    325    -93       N  
ATOM    633  CZ  ARG A  79      83.175 -27.173  -4.885  1.00 32.83           C  
ANISOU  633  CZ  ARG A  79     3307   4333   4835    578    127     -2       C  
ATOM    634  NH1 ARG A  79      83.366 -26.220  -3.981  1.00 25.20           N1+
ANISOU  634  NH1 ARG A  79     2358   3397   3819    496     -1    100       N1+
ATOM    635  NH2 ARG A  79      83.294 -28.449  -4.533  1.00 32.37           N  
ANISOU  635  NH2 ARG A  79     3192   4150   4957    683     44    -10       N  
ATOM    636  N   VAL A  80      79.010 -22.836  -5.435  1.00 18.39           N  
ANISOU  636  N   VAL A  80     2104   2648   2234    262    196    179       N  
ATOM    637  CA  VAL A  80      79.102 -21.392  -5.591  1.00 22.46           C  
ANISOU  637  CA  VAL A  80     2627   3147   2759    182    210    239       C  
ATOM    638  C   VAL A  80      80.496 -20.935  -5.180  1.00 25.63           C  
ANISOU  638  C   VAL A  80     2901   3542   3294    129    192    240       C  
ATOM    639  O   VAL A  80      81.069 -21.433  -4.204  1.00 24.37           O  
ANISOU  639  O   VAL A  80     2683   3371   3206    149     95    206       O  
ATOM    640  CB  VAL A  80      77.996 -20.653  -4.808  1.00 23.19           C  
ANISOU  640  CB  VAL A  80     2824   3163   2825    175    139    244       C  
ATOM    641  CG1 VAL A  80      78.105 -20.922  -3.305  1.00 29.11           C  
ANISOU  641  CG1 VAL A  80     3584   3892   3586    174     38    182       C  
ATOM    642  CG2 VAL A  80      78.040 -19.164  -5.117  1.00 31.01           C  
ANISOU  642  CG2 VAL A  80     3816   4083   3886    105    152    306       C  
ATOM    643  N   THR A  81      81.049 -19.996  -5.946  1.00 27.64           N  
ANISOU  643  N   THR A  81     3104   3811   3586     44    271    301       N  
ATOM    644  CA  THR A  81      82.378 -19.452  -5.697  1.00 25.00           C  
ANISOU  644  CA  THR A  81     2625   3475   3399    -34    267    308       C  
ATOM    645  C   THR A  81      82.277 -17.935  -5.651  1.00 27.71           C  
ANISOU  645  C   THR A  81     3009   3722   3797   -145    247    379       C  
ATOM    646  O   THR A  81      81.801 -17.315  -6.606  1.00 27.45           O  
ANISOU  646  O   THR A  81     3037   3679   3714   -190    320    482       O  
ATOM    647  CB  THR A  81      83.365 -19.899  -6.777  1.00 32.01           C  
ANISOU  647  CB  THR A  81     3366   4476   4321    -51    422    306       C  
ATOM    648  CG2 THR A  81      84.779 -19.401  -6.461  1.00 29.83           C  
ANISOU  648  CG2 THR A  81     2895   4205   4235   -134    416    311       C  
ATOM    649  OG1 THR A  81      83.368 -21.331  -6.847  1.00 25.89           O  
ANISOU  649  OG1 THR A  81     2553   3744   3541     70    445    210       O  
ATOM    650  N   ALA A  82      82.709 -17.346  -4.540  1.00 24.18           N  
ANISOU  650  N   ALA A  82     2532   3197   3459   -200    133    327       N  
ATOM    651  CA  ALA A  82      82.687 -15.904  -4.347  1.00 28.67           C  
ANISOU  651  CA  ALA A  82     3129   3628   4135   -310    103    352       C  
ATOM    652  C   ALA A  82      84.111 -15.374  -4.435  1.00 28.80           C  
ANISOU  652  C   ALA A  82     2977   3652   4313   -440    113    380       C  
ATOM    653  O   ALA A  82      85.016 -15.922  -3.799  1.00 30.87           O  
ANISOU  653  O   ALA A  82     3112   3986   4630   -443     43    314       O  
ATOM    654  CB  ALA A  82      82.060 -15.545  -2.999  1.00 29.08           C  
ANISOU  654  CB  ALA A  82     3277   3587   4184   -303    -19    220       C  
ATOM    655  N   THR A  83      84.304 -14.304  -5.213  1.00 29.30           N  
ANISOU  655  N   THR A  83     3028   3638   4469   -556    186    499       N  
ATOM    656  CA  THR A  83      85.630 -13.784  -5.518  1.00 26.75           C  
ANISOU  656  CA  THR A  83     2528   3333   4302   -706    233    556       C  
ATOM    657  C   THR A  83      85.632 -12.265  -5.448  1.00 30.99           C  
ANISOU  657  C   THR A  83     3099   3661   5016   -857    194    621       C  
ATOM    658  O   THR A  83      84.680 -11.615  -5.885  1.00 33.45           O  
ANISOU  658  O   THR A  83     3548   3839   5322   -848    204    718       O  
ATOM    659  CB  THR A  83      86.101 -14.213  -6.920  1.00 35.93           C  
ANISOU  659  CB  THR A  83     3602   4662   5389   -736    429    678       C  
ATOM    660  CG2 THR A  83      87.579 -13.868  -7.127  1.00 40.40           C  
ANISOU  660  CG2 THR A  83     3935   5286   6128   -888    502    709       C  
ATOM    661  OG1 THR A  83      85.928 -15.623  -7.085  1.00 37.68           O  
ANISOU  661  OG1 THR A  83     3812   5036   5469   -583    477    591       O  
ATOM    662  N   ASN A  84      86.706 -11.708  -4.893  1.00 34.25           N  
ANISOU  662  N   ASN A  84     3372   4026   5615   -996    133    571       N  
ATOM    663  CA  ASN A  84      87.023 -10.295  -5.051  1.00 37.54           C  
ANISOU  663  CA  ASN A  84     3772   4241   6252  -1181    125    655       C  
ATOM    664  C   ASN A  84      88.544 -10.175  -5.111  1.00 45.16           C  
ANISOU  664  C   ASN A  84     4495   5291   7374  -1345    152    675       C  
ATOM    665  O   ASN A  84      89.263 -11.178  -5.114  1.00 34.18           O  
ANISOU  665  O   ASN A  84     2946   4110   5930  -1291    186    629       O  
ATOM    666  CB  ASN A  84      86.387  -9.444  -3.940  1.00 37.79           C  
ANISOU  666  CB  ASN A  84     3927   4031   6399  -1190    -24    490       C  
ATOM    667  CG  ASN A  84      86.922  -9.768  -2.550  1.00 42.14           C  
ANISOU  667  CG  ASN A  84     4422   4645   6945  -1208   -176    250       C  
ATOM    668  ND2 ASN A  84      86.285  -9.191  -1.532  1.00 34.82           N  
ANISOU  668  ND2 ASN A  84     3620   3564   6047  -1212   -279     53       N  
ATOM    669  OD1 ASN A  84      87.904 -10.495  -2.389  1.00 45.97           O  
ANISOU  669  OD1 ASN A  84     4742   5316   7407  -1226   -204    240       O  
ATOM    670  N   THR A  85      89.047  -8.942  -5.145  1.00 44.43           N  
ANISOU  670  N   THR A  85     4350   5016   7515  -1548    133    740       N  
ATOM    671  CA  THR A  85      90.485  -8.759  -5.266  1.00 47.17           C  
ANISOU  671  CA  THR A  85     4441   5445   8038  -1730    169    773       C  
ATOM    672  C   THR A  85      91.258  -9.309  -4.072  1.00 49.34           C  
ANISOU  672  C   THR A  85     4562   5818   8367  -1715      1    559       C  
ATOM    673  O   THR A  85      92.469  -9.518  -4.186  1.00 50.96           O  
ANISOU  673  O   THR A  85     4504   6154   8705  -1812     29    576       O  
ATOM    674  CB  THR A  85      90.814  -7.277  -5.456  1.00 53.18           C  
ANISOU  674  CB  THR A  85     5185   5953   9068  -1973    159    886       C  
ATOM    675  CG2 THR A  85      90.203  -6.764  -6.752  1.00 44.92           C  
ANISOU  675  CG2 THR A  85     4261   4834   7973  -2016    308   1174       C  
ATOM    676  OG1 THR A  85      90.295  -6.523  -4.353  1.00 60.64           O  
ANISOU  676  OG1 THR A  85     6261   6637  10142  -1984    -29    699       O  
ATOM    677  N   ALA A  86      90.601  -9.562  -2.941  1.00 47.99           N  
ANISOU  677  N   ALA A  86     4536   5605   8095  -1605   -173    372       N  
ATOM    678  CA  ALA A  86      91.311 -10.010  -1.751  1.00 42.21           C  
ANISOU  678  CA  ALA A  86     3679   4975   7383  -1623   -376    203       C  
ATOM    679  C   ALA A  86      91.375 -11.526  -1.604  1.00 45.16           C  
ANISOU  679  C   ALA A  86     3989   5579   7592  -1426   -397    194       C  
ATOM    680  O   ALA A  86      92.178 -12.013  -0.802  1.00 54.01           O  
ANISOU  680  O   ALA A  86     4946   6810   8764  -1444   -571    124       O  
ATOM    681  CB  ALA A  86      90.673  -9.410  -0.495  1.00 39.97           C  
ANISOU  681  CB  ALA A  86     3583   4547   7057  -1661   -561     -9       C  
ATOM    682  N   GLY A  87      90.562 -12.281  -2.331  1.00 39.94           N  
ANISOU  682  N   GLY A  87     3444   4978   6753  -1247   -250    267       N  
ATOM    683  CA  GLY A  87      90.600 -13.724  -2.211  1.00 38.23           C  
ANISOU  683  CA  GLY A  87     3169   4932   6425  -1063   -270    251       C  
ATOM    684  C   GLY A  87      89.361 -14.371  -2.803  1.00 42.72           C  
ANISOU  684  C   GLY A  87     3945   5514   6773   -888   -145    286       C  
ATOM    685  O   GLY A  87      88.563 -13.728  -3.485  1.00 38.25           O  
ANISOU  685  O   GLY A  87     3535   4854   6144   -907    -29    351       O  
ATOM    686  N   SER A  88      89.233 -15.672  -2.531  1.00 43.91           N  
ANISOU  686  N   SER A  88     4081   5771   6831   -724   -190    255       N  
ATOM    687  CA  SER A  88      88.129 -16.477  -3.034  1.00 41.33           C  
ANISOU  687  CA  SER A  88     3923   5468   6312   -562    -91    270       C  
ATOM    688  C   SER A  88      87.690 -17.472  -1.969  1.00 35.45           C  
ANISOU  688  C   SER A  88     3255   4753   5461   -443   -263    211       C  
ATOM    689  O   SER A  88      88.467 -17.858  -1.093  1.00 35.56           O  
ANISOU  689  O   SER A  88     3139   4813   5561   -457   -441    193       O  
ATOM    690  CB  SER A  88      88.509 -17.238  -4.313  1.00 49.20           C  
ANISOU  690  CB  SER A  88     4793   6575   7327   -490    123    315       C  
ATOM    691  OG  SER A  88      88.990 -16.358  -5.309  1.00 62.95           O  
ANISOU  691  OG  SER A  88     6457   8330   9132   -633    294    397       O  
ATOM    692  N   THR A  89      86.431 -17.899  -2.068  1.00 32.66           N  
ANISOU  692  N   THR A  89     3106   4381   4923   -340   -220    205       N  
ATOM    693  CA  THR A  89      85.894 -18.931  -1.193  1.00 32.98           C  
ANISOU  693  CA  THR A  89     3232   4453   4845   -240   -350    181       C  
ATOM    694  C   THR A  89      84.760 -19.644  -1.918  1.00 31.79           C  
ANISOU  694  C   THR A  89     3219   4299   4559   -116   -220    196       C  
ATOM    695  O   THR A  89      84.032 -19.040  -2.713  1.00 30.04           O  
ANISOU  695  O   THR A  89     3099   4042   4273   -128    -90    210       O  
ATOM    696  CB  THR A  89      85.408 -18.350   0.143  1.00 36.69           C  
ANISOU  696  CB  THR A  89     3845   4900   5195   -327   -512    109       C  
ATOM    697  CG2 THR A  89      84.201 -17.438  -0.068  1.00 34.98           C  
ANISOU  697  CG2 THR A  89     3818   4588   4885   -346   -406     54       C  
ATOM    698  OG1 THR A  89      85.043 -19.419   1.026  1.00 42.15           O  
ANISOU  698  OG1 THR A  89     4603   5656   5755   -263   -645    126       O  
ATOM    699  N   SER A  90      84.614 -20.937  -1.639  1.00 26.11           N  
ANISOU  699  N   SER A  90     2496   3609   3815     -5   -277    208       N  
ATOM    700  CA  SER A  90      83.696 -21.764  -2.408  1.00 27.30           C  
ANISOU  700  CA  SER A  90     2741   3756   3875    103   -158    206       C  
ATOM    701  C   SER A  90      83.063 -22.812  -1.502  1.00 26.52           C  
ANISOU  701  C   SER A  90     2734   3644   3697    168   -287    225       C  
ATOM    702  O   SER A  90      83.690 -23.294  -0.555  1.00 24.10           O  
ANISOU  702  O   SER A  90     2357   3346   3455    164   -459    270       O  
ATOM    703  CB  SER A  90      84.429 -22.431  -3.580  1.00 35.33           C  
ANISOU  703  CB  SER A  90     3598   4808   5019    169     -9    187       C  
ATOM    704  OG  SER A  90      83.541 -23.160  -4.401  1.00 39.30           O  
ANISOU  704  OG  SER A  90     4202   5315   5416    247    107    153       O  
ATOM    705  N   CYS A  91      81.810 -23.158  -1.796  1.00 24.46           N  
ANISOU  705  N   CYS A  91     2626   3368   3300    212   -217    213       N  
ATOM    706  CA  CYS A  91      81.140 -24.261  -1.117  1.00 30.21           C  
ANISOU  706  CA  CYS A  91     3437   4078   3964    260   -305    248       C  
ATOM    707  C   CYS A  91      80.186 -24.938  -2.090  1.00 24.65           C  
ANISOU  707  C   CYS A  91     2803   3349   3215    332   -177    217       C  
ATOM    708  O   CYS A  91      79.815 -24.371  -3.120  1.00 28.71           O  
ANISOU  708  O   CYS A  91     3343   3885   3681    325    -44    177       O  
ATOM    709  CB  CYS A  91      80.384 -23.793   0.133  1.00 30.67           C  
ANISOU  709  CB  CYS A  91     3637   4170   3847    173   -400    253       C  
ATOM    710  SG  CYS A  91      78.976 -22.722  -0.193  1.00 30.43           S  
ANISOU  710  SG  CYS A  91     3748   4130   3683    142   -262    171       S  
ATOM    711  N   GLN A  92      79.789 -26.165  -1.753  1.00 23.17           N  
ANISOU  711  N   GLN A  92     2648   3114   3042    384   -237    250       N  
ATOM    712  CA  GLN A  92      78.855 -26.888  -2.605  1.00 21.78           C  
ANISOU  712  CA  GLN A  92     2538   2907   2832    433   -137    203       C  
ATOM    713  C   GLN A  92      77.890 -27.712  -1.764  1.00 23.12           C  
ANISOU  713  C   GLN A  92     2813   3036   2935    419   -223    267       C  
ATOM    714  O   GLN A  92      78.137 -28.002  -0.589  1.00 24.09           O  
ANISOU  714  O   GLN A  92     2947   3153   3055    383   -364    367       O  
ATOM    715  CB  GLN A  92      79.592 -27.780  -3.616  1.00 23.30           C  
ANISOU  715  CB  GLN A  92     2608   3050   3195    521    -56    126       C  
ATOM    716  CG  GLN A  92      80.148 -29.081  -3.066  1.00 34.88           C  
ANISOU  716  CG  GLN A  92     3989   4392   4870    598   -169    167       C  
ATOM    717  CD  GLN A  92      80.500 -30.066  -4.175  1.00 41.71           C  
ANISOU  717  CD  GLN A  92     4757   5177   5913    695    -46     24       C  
ATOM    718  NE2 GLN A  92      80.920 -31.265  -3.792  1.00 43.45           N  
ANISOU  718  NE2 GLN A  92     4891   5234   6383    783   -142     50       N  
ATOM    719  OE1 GLN A  92      80.397 -29.747  -5.362  1.00 41.32           O  
ANISOU  719  OE1 GLN A  92     4711   5210   5779    682    131   -109       O  
ATOM    720  N   ALA A  93      76.775 -28.083  -2.393  1.00 23.67           N  
ANISOU  720  N   ALA A  93     2960   3095   2940    425   -143    221       N  
ATOM    721  CA  ALA A  93      75.779 -28.959  -1.793  1.00 25.49           C  
ANISOU  721  CA  ALA A  93     3274   3282   3129    397   -194    278       C  
ATOM    722  C   ALA A  93      75.139 -29.804  -2.886  1.00 27.95           C  
ANISOU  722  C   ALA A  93     3596   3534   3490    433   -116    193       C  
ATOM    723  O   ALA A  93      75.226 -29.491  -4.077  1.00 23.43           O  
ANISOU  723  O   ALA A  93     2998   3002   2903    459    -16     86       O  
ATOM    724  CB  ALA A  93      74.705 -28.167  -1.039  1.00 20.98           C  
ANISOU  724  CB  ALA A  93     2797   2800   2375    311   -181    298       C  
ATOM    725  N   HIS A  94      74.475 -30.874  -2.463  1.00 20.98           N  
ANISOU  725  N   HIS A  94     2758   2565   2647    410   -170    245       N  
ATOM    726  CA  HIS A  94      73.835 -31.814  -3.369  1.00 23.10           C  
ANISOU  726  CA  HIS A  94     3040   2753   2984    423   -120    150       C  
ATOM    727  C   HIS A  94      72.323 -31.625  -3.359  1.00 24.24           C  
ANISOU  727  C   HIS A  94     3259   2966   2986    339    -92    154       C  
ATOM    728  O   HIS A  94      71.715 -31.440  -2.301  1.00 19.55           O  
ANISOU  728  O   HIS A  94     2707   2413   2309    270   -127    261       O  
ATOM    729  CB  HIS A  94      74.173 -33.253  -2.976  1.00 20.91           C  
ANISOU  729  CB  HIS A  94     2739   2280   2927    451   -209    205       C  
ATOM    730  CG  HIS A  94      73.672 -34.276  -3.944  1.00 27.43           C  
ANISOU  730  CG  HIS A  94     3568   2986   3868    462   -157     61       C  
ATOM    731  CD2 HIS A  94      74.159 -34.683  -5.141  1.00 28.81           C  
ANISOU  731  CD2 HIS A  94     3687   3111   4150    529    -65   -146       C  
ATOM    732  ND1 HIS A  94      72.530 -35.016  -3.723  1.00 29.33           N  
ANISOU  732  ND1 HIS A  94     3874   3154   4114    378   -190    102       N  
ATOM    733  CE1 HIS A  94      72.340 -35.842  -4.738  1.00 31.06           C  
ANISOU  733  CE1 HIS A  94     4082   3265   4454    393   -141    -78       C  
ATOM    734  NE2 HIS A  94      73.314 -35.658  -5.612  1.00 30.73           N  
ANISOU  734  NE2 HIS A  94     3972   3243   4461    485    -59   -244       N  
ATOM    735  N   LEU A  95      71.724 -31.680  -4.541  1.00 19.68           N  
ANISOU  735  N   LEU A  95     2685   2419   2375    336    -29     31       N  
ATOM    736  CA  LEU A  95      70.279 -31.727  -4.695  1.00 23.10           C  
ANISOU  736  CA  LEU A  95     3149   2897   2730    262    -24     25       C  
ATOM    737  C   LEU A  95      69.892 -33.121  -5.163  1.00 16.58           C  
ANISOU  737  C   LEU A  95     2332   1942   2025    232    -44    -50       C  
ATOM    738  O   LEU A  95      70.435 -33.615  -6.155  1.00 23.77           O  
ANISOU  738  O   LEU A  95     3228   2805   2998    271    -11   -197       O  
ATOM    739  CB  LEU A  95      69.785 -30.685  -5.704  1.00 19.93           C  
ANISOU  739  CB  LEU A  95     2738   2634   2199    260     19    -34       C  
ATOM    740  CG  LEU A  95      68.308 -30.813  -6.108  1.00 23.71           C  
ANISOU  740  CG  LEU A  95     3212   3161   2636    191     -2    -53       C  
ATOM    741  CD1 LEU A  95      67.394 -30.554  -4.915  1.00 23.90           C  
ANISOU  741  CD1 LEU A  95     3219   3200   2664    147     -4     43       C  
ATOM    742  CD2 LEU A  95      67.940 -29.882  -7.275  1.00 18.22           C  
ANISOU  742  CD2 LEU A  95     2501   2595   1827    191     -6    -79       C  
ATOM    743  N   GLN A  96      68.955 -33.747  -4.458  1.00 21.18           N  
ANISOU  743  N   GLN A  96     2934   2469   2645    148    -83     32       N  
ATOM    744  CA  GLN A  96      68.382 -35.029  -4.860  1.00 20.73           C  
ANISOU  744  CA  GLN A  96     2885   2270   2722     89   -111    -34       C  
ATOM    745  C   GLN A  96      66.929 -34.790  -5.262  1.00 26.53           C  
ANISOU  745  C   GLN A  96     3602   3116   3361     -7   -103    -69       C  
ATOM    746  O   GLN A  96      66.110 -34.393  -4.433  1.00 24.11           O  
ANISOU  746  O   GLN A  96     3277   2887   2996    -70    -94     47       O  
ATOM    747  CB  GLN A  96      68.467 -36.055  -3.734  1.00 19.51           C  
ANISOU  747  CB  GLN A  96     2750   1937   2724     42   -179    126       C  
ATOM    748  CG  GLN A  96      67.965 -37.435  -4.142  1.00 21.34           C  
ANISOU  748  CG  GLN A  96     2987   1964   3157    -24   -215     58       C  
ATOM    749  CD  GLN A  96      68.822 -38.050  -5.242  1.00 33.55           C  
ANISOU  749  CD  GLN A  96     4513   3368   4865     72   -196   -166       C  
ATOM    750  NE2 GLN A  96      68.187 -38.492  -6.316  1.00 36.79           N  
ANISOU  750  NE2 GLN A  96     4927   3766   5284     15   -171   -377       N  
ATOM    751  OE1 GLN A  96      70.044 -38.116  -5.122  1.00 36.49           O  
ANISOU  751  OE1 GLN A  96     4855   3656   5353    188   -200   -164       O  
ATOM    752  N   VAL A  97      66.616 -35.006  -6.532  1.00 26.60           N  
ANISOU  752  N   VAL A  97     3604   3152   3348    -25   -106   -238       N  
ATOM    753  CA  VAL A  97      65.243 -34.935  -7.017  1.00 25.23           C  
ANISOU  753  CA  VAL A  97     3393   3075   3117   -125   -140   -271       C  
ATOM    754  C   VAL A  97      64.667 -36.345  -6.993  1.00 24.19           C  
ANISOU  754  C   VAL A  97     3264   2770   3155   -233   -183   -324       C  
ATOM    755  O   VAL A  97      65.190 -37.247  -7.655  1.00 33.77           O  
ANISOU  755  O   VAL A  97     4512   3844   4473   -228   -190   -484       O  
ATOM    756  CB  VAL A  97      65.186 -34.326  -8.426  1.00 27.62           C  
ANISOU  756  CB  VAL A  97     3695   3537   3264   -117   -155   -401       C  
ATOM    757  CG1 VAL A  97      63.750 -34.069  -8.842  1.00 19.81           C  
ANISOU  757  CG1 VAL A  97     2638   2668   2222   -212   -231   -390       C  
ATOM    758  CG2 VAL A  97      65.979 -33.022  -8.466  1.00 24.38           C  
ANISOU  758  CG2 VAL A  97     3290   3244   2728    -16   -111   -331       C  
ATOM    759  N   GLU A  98      63.609 -36.549  -6.213  1.00 28.02           N  
ANISOU  759  N   GLU A  98     3703   3253   3690   -338   -196   -203       N  
ATOM    760  CA  GLU A  98      63.059 -37.885  -6.015  1.00 31.76           C  
ANISOU  760  CA  GLU A  98     4175   3538   4352   -467   -237   -206       C  
ATOM    761  C   GLU A  98      61.868 -38.134  -6.938  1.00 29.40           C  
ANISOU  761  C   GLU A  98     3811   3304   4054   -589   -294   -341       C  
ATOM    762  O   GLU A  98      61.116 -37.219  -7.280  1.00 25.41           O  
ANISOU  762  O   GLU A  98     3229   3009   3418   -596   -309   -335       O  
ATOM    763  CB  GLU A  98      62.655 -38.092  -4.551  1.00 29.37           C  
ANISOU  763  CB  GLU A  98     3861   3198   4100   -550   -209     30       C  
ATOM    764  CG  GLU A  98      63.824 -37.958  -3.563  1.00 27.63           C  
ANISOU  764  CG  GLU A  98     3711   2920   3866   -462   -194    185       C  
ATOM    765  CD  GLU A  98      63.431 -38.246  -2.119  1.00 43.94           C  
ANISOU  765  CD  GLU A  98     5789   4980   5926   -586   -176    431       C  
ATOM    766  OE1 GLU A  98      62.280 -38.675  -1.876  1.00 48.32           O  
ANISOU  766  OE1 GLU A  98     6292   5547   6522   -745   -154    482       O  
ATOM    767  OE2 GLU A  98      64.280 -38.038  -1.224  1.00 46.40           O1-
ANISOU  767  OE2 GLU A  98     6158   5295   6178   -542   -186    579       O1-
ATOM    768  N   ARG A  99      61.699 -39.394  -7.323  1.00 40.66           N  
ANISOU  768  N   ARG A  99     5258   4531   5657   -688   -343   -459       N  
ATOM    769  CA  ARG A  99      60.766 -39.785  -8.372  1.00 51.80           C  
ANISOU  769  CA  ARG A  99     6624   5987   7072   -818   -423   -644       C  
ATOM    770  C   ARG A  99      59.351 -39.898  -7.797  1.00 59.84           C  
ANISOU  770  C   ARG A  99     7520   7053   8165   -979   -451   -513       C  
ATOM    771  O   ARG A  99      59.109 -39.612  -6.622  1.00 64.46           O  
ANISOU  771  O   ARG A  99     8064   7662   8767   -987   -381   -295       O  
ATOM    772  CB  ARG A  99      61.228 -41.087  -9.026  1.00 60.33           C  
ANISOU  772  CB  ARG A  99     7775   6813   8334   -864   -452   -875       C  
ATOM    773  CG  ARG A  99      62.493 -40.984  -9.904  1.00 68.71           C  
ANISOU  773  CG  ARG A  99     8920   7875   9313   -725   -400  -1092       C  
ATOM    774  CD  ARG A  99      63.781 -40.807  -9.080  1.00 75.62           C  
ANISOU  774  CD  ARG A  99     9831   8637  10264   -551   -321   -953       C  
ATOM    775  NE  ARG A  99      63.739 -41.560  -7.825  1.00 75.37           N  
ANISOU  775  NE  ARG A  99     9797   8359  10483   -584   -345   -731       N  
ATOM    776  CZ  ARG A  99      64.597 -41.409  -6.818  1.00 64.60           C  
ANISOU  776  CZ  ARG A  99     8451   6917   9178   -477   -325   -521       C  
ATOM    777  NH1 ARG A  99      65.584 -40.526  -6.901  1.00 63.33           N1+
ANISOU  777  NH1 ARG A  99     8299   6890   8874   -322   -271   -525       N1+
ATOM    778  NH2 ARG A  99      64.463 -42.137  -5.720  1.00 58.66           N  
ANISOU  778  NH2 ARG A  99     7706   5962   8620   -545   -371   -290       N  
ATOM    779  N   LEU A 100      58.405 -40.331  -8.634  1.00 72.82           N  
ANISOU  779  N   LEU A 100     9095   8728   9845  -1124   -550   -659       N  
ATOM    780  CA  LEU A 100      56.965 -40.347  -8.335  1.00 76.82           C  
ANISOU  780  CA  LEU A 100     9436   9323  10428  -1286   -589   -570       C  
ATOM    781  C   LEU A 100      56.430 -38.928  -8.172  1.00 74.72           C  
ANISOU  781  C   LEU A 100     9044   9338  10011  -1199   -569   -450       C  
ATOM    782  O   LEU A 100      55.762 -38.403  -9.062  1.00 73.68           O  
ANISOU  782  O   LEU A 100     8813   9383   9799  -1220   -682   -522       O  
ATOM    783  CB  LEU A 100      56.648 -41.174  -7.081  1.00 76.61           C  
ANISOU  783  CB  LEU A 100     9388   9108  10613  -1408   -516   -385       C  
ATOM    784  CG  LEU A 100      56.589 -42.697  -7.208  1.00 78.71           C  
ANISOU  784  CG  LEU A 100     9706   9063  11139  -1571   -574   -469       C  
ATOM    785  CD1 LEU A 100      56.816 -43.352  -5.850  1.00 75.86           C  
ANISOU  785  CD1 LEU A 100     9388   8494  10940  -1632   -496   -208       C  
ATOM    786  CD2 LEU A 100      55.260 -43.147  -7.805  1.00 83.07           C  
ANISOU  786  CD2 LEU A 100    10112   9654  11794  -1789   -677   -580       C  
HETATM  787  O1  SO4 A 197      77.902 -12.999  11.030  1.00 82.77           O  
HETATM  788  O2  SO4 A 197      76.013 -11.797  10.181  1.00 79.71           O  
HETATM  789  O3  SO4 A 197      76.231 -12.190  12.520  1.00 88.12           O1-
HETATM  790  O4  SO4 A 197      75.751 -14.013  11.045  1.00 77.18           O  
HETATM  791  S   SO4 A 197      76.472 -12.750  11.192  1.00 83.69           S  
HETATM  792  O1  SO4 A 198      83.962 -29.049  -1.819  1.00 98.68           O  
HETATM  793  O2  SO4 A 198      83.699 -26.673  -1.700  1.00 97.58           O  
HETATM  794  O3  SO4 A 198      85.878 -27.636  -1.636  1.00 99.04           O1-
HETATM  795  O4  SO4 A 198      84.403 -27.899   0.220  1.00100.03           O  
HETATM  796  S   SO4 A 198      84.485 -27.815  -1.235  1.00 98.53           S  
HETATM  797  O1  SO4 A 199      57.243 -20.771 -18.654  1.00 52.64           O  
HETATM  798  O2  SO4 A 199      55.860 -19.187 -17.548  1.00 57.37           O  
HETATM  799  O3  SO4 A 199      57.992 -19.727 -16.650  1.00 59.94           O1-
HETATM  800  O4  SO4 A 199      56.233 -21.324 -16.566  1.00 51.45           O  
HETATM  801  S   SO4 A 199      56.832 -20.255 -17.356  1.00 48.76           S  
HETATM  802  O1  SO4 A 200      58.963 -22.464  -3.790  1.00 90.99           O  
HETATM  803  O2  SO4 A 200      57.718 -21.053  -5.253  1.00 89.01           O  
HETATM  804  O3  SO4 A 200      57.870 -20.533  -2.920  1.00 82.60           O1-
HETATM  805  O4  SO4 A 200      56.580 -22.398  -3.657  1.00 92.72           O  
HETATM  806  S   SO4 A 200      57.784 -21.609  -3.905  1.00 88.13           S  
HETATM  807  O   HOH A 297      54.303 -23.880 -11.265  1.00 40.97           O  
HETATM  808  O   HOH A 298      63.965 -38.617   0.981  1.00 44.11           O  
HETATM  809  O   HOH A 299      79.359 -28.461 -19.529  1.00 60.56           O  
HETATM  810  O   HOH A 300      72.330  -9.658   4.020  1.00 45.29           O  
HETATM  811  O   HOH A 301      67.483 -37.756  -9.891  1.00 40.88           O  
HETATM  812  O   HOH A 302      57.588 -26.458  -9.223  1.00 39.41           O  
HETATM  813  O   HOH A 303      84.448 -10.904   4.225  1.00 56.81           O  
HETATM  814  O   HOH A 304      53.731 -17.947 -18.159  1.00 38.73           O  
HETATM  815  O   HOH A 305      83.376 -14.310  -9.969  1.00 54.98           O  
HETATM  816  O   HOH A 306      83.724 -16.317  -8.189  1.00 28.45           O  
HETATM  817  O   HOH A 307      59.773 -29.128  -2.371  1.00 20.40           O  
HETATM  818  O   HOH A 308      81.731 -22.152  -8.673  1.00 33.76           O  
HETATM  819  O   HOH A 309      61.613 -30.578  -0.585  1.00 22.90           O  
HETATM  820  O   HOH A 310      69.799 -16.544   5.826  1.00 37.52           O  
HETATM  821  O   HOH A 311      70.047 -28.449 -13.222  1.00 34.89           O  
HETATM  822  O   HOH A 312      77.524 -16.957  10.302  1.00 39.83           O  
HETATM  823  O   HOH A 313      78.173 -10.142  -2.951  1.00 46.23           O  
HETATM  824  O   HOH A 314      81.156 -27.299   0.264  1.00 35.22           O  
HETATM  825  O   HOH A 315      56.945 -27.010  -4.490  1.00 25.68           O  
HETATM  826  O   HOH A 316      71.814 -22.848   3.520  1.00 28.95           O  
HETATM  827  O   HOH A 317      68.307 -27.762   2.747  1.00 19.13           O  
HETATM  828  O   HOH A 318      78.054 -26.064   1.553  1.00 25.60           O  
HETATM  829  O   HOH A 319      73.872 -23.847   5.907  1.00 43.68           O  
HETATM  830  O   HOH A 320      90.066  -1.486   4.420  1.00 67.30           O  
HETATM  831  O   HOH A 321      74.302 -36.814  -7.907  1.00 35.68           O  
HETATM  832  O   HOH A 322      86.910 -22.197  -0.768  1.00 44.23           O  
HETATM  833  O   HOH A 323      55.216 -33.350  -7.817  1.00 28.75           O  
HETATM  834  O   HOH A 324      83.800 -30.852  -5.890  1.00 43.78           O  
HETATM  835  O   HOH A 325      83.420 -24.625 -14.763  1.00 56.20           O  
HETATM  836  O   HOH A 326      72.491 -16.613   8.115  1.00 38.48           O  
HETATM  837  O   HOH A 327      79.955 -20.447 -13.498  1.00 36.29           O  
HETATM  838  O   HOH A 328      70.331 -20.481 -19.301  1.00 44.34           O  
HETATM  839  O   HOH A 329      76.353 -22.224   7.262  1.00 36.07           O  
HETATM  840  O   HOH A 330      75.390 -38.135  -6.026  1.00 36.03           O  
HETATM  841  O   HOH A 331      79.418 -28.084  -9.181  1.00 25.82           O  
HETATM  842  O   HOH A 332      62.812 -20.557 -10.527  1.00 36.91           O  
HETATM  843  O   HOH A 333      73.988 -26.360 -15.838  1.00 47.42           O  
HETATM  844  O   HOH A 334      73.925 -29.891   4.294  1.00 32.82           O  
HETATM  845  O   HOH A 335      79.240 -31.798  -1.454  1.00 51.51           O  
HETATM  846  O   HOH A 336      77.281 -18.401 -12.754  1.00 37.50           O  
HETATM  847  O   HOH A 337      70.781 -34.293  -1.419  1.00 24.62           O  
HETATM  848  O   HOH A 338      81.550 -33.968  -4.855  1.00 40.64           O  
HETATM  849  O   HOH A 339      71.069 -24.025   1.048  1.00 21.52           O  
HETATM  850  O   HOH A 340      71.727 -34.299 -15.483  1.00 48.60           O  
HETATM  851  O   HOH A 341      86.932  -7.284  -6.470  1.00 48.24           O  
HETATM  852  O   HOH A 342      77.007 -32.681  -0.922  1.00 36.30           O  
HETATM  853  O   HOH A 343      54.903 -38.964  -2.984  1.00 40.59           O  
HETATM  854  O   HOH A 344      91.320 -16.900  -0.491  1.00 41.13           O  
HETATM  855  O   HOH A 345      75.069 -14.566  -8.823  1.00 29.33           O  
HETATM  856  O   HOH A 346      68.859 -25.776   0.918  1.00 35.95           O  
HETATM  857  O   HOH A 347      59.563 -39.567  -3.314  1.00 45.45           O  
HETATM  858  O   HOH A 348      83.386 -27.940  -9.128  1.00 55.81           O  
HETATM  859  O   HOH A 349      56.929 -40.083  -2.925  1.00 59.20           O  
HETATM  860  O   HOH A 350      74.652 -18.061 -13.364  1.00 43.57           O  
ATOM    861  N   SER B   3      21.267 -27.010 -18.969  1.00 59.43           N  
ANISOU  861  N   SER B   3     6427   8652   7502    -45  -1623    382       N  
ATOM    862  CA  SER B   3      21.824 -25.761 -18.463  1.00 63.34           C  
ANISOU  862  CA  SER B   3     7042   9166   7859     64  -1487    447       C  
ATOM    863  C   SER B   3      22.826 -25.986 -17.326  1.00 65.72           C  
ANISOU  863  C   SER B   3     7391   9408   8172     46  -1308    468       C  
ATOM    864  O   SER B   3      23.472 -25.037 -16.878  1.00 69.10           O  
ANISOU  864  O   SER B   3     7931   9828   8497    128  -1206    496       O  
ATOM    865  CB  SER B   3      20.706 -24.829 -17.980  1.00 67.92           C  
ANISOU  865  CB  SER B   3     7496   9825   8486    177  -1486    547       C  
ATOM    866  OG  SER B   3      20.099 -25.323 -16.797  1.00 70.35           O  
ANISOU  866  OG  SER B   3     7605  10177   8948    165  -1397    628       O  
ATOM    867  N   THR B   4      22.951 -27.228 -16.852  1.00 61.84           N  
ANISOU  867  N   THR B   4     6810   8863   7822    -61  -1289    462       N  
ATOM    868  CA  THR B   4      23.894 -27.563 -15.791  1.00 57.81           C  
ANISOU  868  CA  THR B   4     6335   8301   7329    -86  -1135    493       C  
ATOM    869  C   THR B   4      24.775 -28.729 -16.225  1.00 58.20           C  
ANISOU  869  C   THR B   4     6451   8239   7425   -197  -1181    385       C  
ATOM    870  O   THR B   4      24.453 -29.466 -17.160  1.00 63.83           O  
ANISOU  870  O   THR B   4     7132   8915   8204   -259  -1339    286       O  
ATOM    871  CB  THR B   4      23.186 -27.915 -14.467  1.00 55.84           C  
ANISOU  871  CB  THR B   4     5876   8115   7225    -95  -1045    640       C  
ATOM    872  CG2 THR B   4      22.326 -26.748 -13.992  1.00 55.77           C  
ANISOU  872  CG2 THR B   4     5787   8244   7158     49   -998    711       C  
ATOM    873  OG1 THR B   4      22.364 -29.078 -14.640  1.00 55.15           O  
ANISOU  873  OG1 THR B   4     5603   8003   7348   -216  -1161    683       O  
ATOM    874  N   LEU B   5      25.899 -28.886 -15.527  1.00 51.32           N  
ANISOU  874  N   LEU B   5     5666   7311   6523   -208  -1053    385       N  
ATOM    875  CA  LEU B   5      26.857 -29.943 -15.836  1.00 50.21           C  
ANISOU  875  CA  LEU B   5     5590   7059   6430   -291  -1087    271       C  
ATOM    876  C   LEU B   5      27.643 -30.273 -14.577  1.00 45.18           C  
ANISOU  876  C   LEU B   5     4950   6369   5848   -315   -942    351       C  
ATOM    877  O   LEU B   5      28.306 -29.395 -14.013  1.00 30.53           O  
ANISOU  877  O   LEU B   5     3194   4552   3854   -241   -808    385       O  
ATOM    878  CB  LEU B   5      27.802 -29.527 -16.965  1.00 51.62           C  
ANISOU  878  CB  LEU B   5     5958   7255   6401   -252  -1112    123       C  
ATOM    879  CG  LEU B   5      28.773 -30.615 -17.435  1.00 53.36           C  
ANISOU  879  CG  LEU B   5     6234   7390   6651   -306  -1162    -41       C  
ATOM    880  CD1 LEU B   5      28.010 -31.864 -17.872  1.00 51.62           C  
ANISOU  880  CD1 LEU B   5     5879   7089   6646   -381  -1352   -131       C  
ATOM    881  CD2 LEU B   5      29.677 -30.106 -18.552  1.00 49.69           C  
ANISOU  881  CD2 LEU B   5     5930   7015   5937   -251  -1165   -167       C  
ATOM    882  N   ARG B   6      27.580 -31.535 -14.161  1.00 42.20           N  
ANISOU  882  N   ARG B   6     4456   5894   5684   -418   -991    383       N  
ATOM    883  CA  ARG B   6      28.175 -31.952 -12.901  1.00 33.22           C  
ANISOU  883  CA  ARG B   6     3282   4722   4619   -450   -869    500       C  
ATOM    884  C   ARG B   6      29.679 -31.670 -12.906  1.00 33.51           C  
ANISOU  884  C   ARG B   6     3513   4712   4505   -410   -777    394       C  
ATOM    885  O   ARG B   6      30.326 -31.777 -13.952  1.00 32.99           O  
ANISOU  885  O   ARG B   6     3569   4600   4366   -405   -845    220       O  
ATOM    886  CB  ARG B   6      27.894 -33.441 -12.670  1.00 37.12           C  
ANISOU  886  CB  ARG B   6     3619   5083   5403   -586   -983    558       C  
ATOM    887  CG  ARG B   6      28.824 -34.140 -11.690  1.00 57.37           C  
ANISOU  887  CG  ARG B   6     6180   7560   8058   -637   -907    638       C  
ATOM    888  CD  ARG B   6      28.551 -35.636 -11.619  1.00 73.00           C  
ANISOU  888  CD  ARG B   6     8004   9362  10369   -780  -1068    697       C  
ATOM    889  NE  ARG B   6      28.274 -36.213 -12.932  1.00 79.09           N  
ANISOU  889  NE  ARG B   6     8788  10007  11256   -812  -1286    487       N  
ATOM    890  CZ  ARG B   6      29.183 -36.830 -13.683  1.00 75.10           C  
ANISOU  890  CZ  ARG B   6     8396   9354  10783   -807  -1393    251       C  
ATOM    891  NH1 ARG B   6      30.436 -36.941 -13.255  1.00 69.40           N1+
ANISOU  891  NH1 ARG B   6     7785   8582  10001   -781  -1295    213       N1+
ATOM    892  NH2 ARG B   6      28.841 -37.330 -14.865  1.00 71.42           N  
ANISOU  892  NH2 ARG B   6     7927   8808  10403   -814  -1604     39       N  
ATOM    893  N   PRO B   7      30.263 -31.277 -11.770  1.00 35.51           N  
ANISOU  893  N   PRO B   7     3791   5003   4697   -371   -625    490       N  
ATOM    894  CA  PRO B   7      31.709 -31.027 -11.742  1.00 35.83           C  
ANISOU  894  CA  PRO B   7     4001   4995   4618   -341   -546    398       C  
ATOM    895  C   PRO B   7      32.493 -32.303 -12.017  1.00 33.65           C  
ANISOU  895  C   PRO B   7     3735   4572   4478   -424   -617    305       C  
ATOM    896  O   PRO B   7      32.070 -33.404 -11.666  1.00 31.83           O  
ANISOU  896  O   PRO B   7     3369   4256   4468   -511   -694    374       O  
ATOM    897  CB  PRO B   7      31.960 -30.517 -10.316  1.00 32.65           C  
ANISOU  897  CB  PRO B   7     3578   4665   4163   -287   -398    530       C  
ATOM    898  CG  PRO B   7      30.631 -30.106  -9.801  1.00 34.80           C  
ANISOU  898  CG  PRO B   7     3700   5073   4450   -244   -383    658       C  
ATOM    899  CD  PRO B   7      29.638 -31.003 -10.466  1.00 38.12           C  
ANISOU  899  CD  PRO B   7     3986   5453   5045   -339   -520    679       C  
ATOM    900  N   MET B   8      33.657 -32.141 -12.640  1.00 33.65           N  
ANISOU  900  N   MET B   8     3885   4544   4357   -395   -600    155       N  
ATOM    901  CA  MET B   8      34.498 -33.274 -13.003  1.00 34.81           C  
ANISOU  901  CA  MET B   8     4049   4564   4613   -440   -673     20       C  
ATOM    902  C   MET B   8      35.956 -32.854 -12.914  1.00 31.98           C  
ANISOU  902  C   MET B   8     3828   4217   4106   -395   -561    -47       C  
ATOM    903  O   MET B   8      36.319 -31.772 -13.379  1.00 29.80           O  
ANISOU  903  O   MET B   8     3656   4043   3622   -336   -496    -72       O  
ATOM    904  CB  MET B   8      34.169 -33.764 -14.416  1.00 40.80           C  
ANISOU  904  CB  MET B   8     4808   5311   5384   -443   -838   -174       C  
ATOM    905  CG  MET B   8      34.958 -34.979 -14.860  1.00 60.82           C  
ANISOU  905  CG  MET B   8     7347   7716   8048   -461   -946   -365       C  
ATOM    906  SD  MET B   8      34.848 -35.252 -16.641  1.00 73.86           S  
ANISOU  906  SD  MET B   8     9033   9436   9595   -404  -1117   -658       S  
ATOM    907  CE  MET B   8      33.101 -34.957 -16.918  1.00 75.04           C  
ANISOU  907  CE  MET B   8     9078   9629   9803   -439  -1224   -556       C  
ATOM    908  N   PHE B   9      36.790 -33.701 -12.322  1.00 28.09           N  
ANISOU  908  N   PHE B   9     3323   3614   3737   -426   -551    -59       N  
ATOM    909  CA  PHE B   9      38.217 -33.416 -12.271  1.00 33.11           C  
ANISOU  909  CA  PHE B   9     4070   4257   4253   -387   -457   -132       C  
ATOM    910  C   PHE B   9      38.857 -33.816 -13.594  1.00 33.29           C  
ANISOU  910  C   PHE B   9     4146   4293   4211   -357   -533   -364       C  
ATOM    911  O   PHE B   9      38.730 -34.964 -14.028  1.00 33.47           O  
ANISOU  911  O   PHE B   9     4107   4215   4397   -377   -672   -497       O  
ATOM    912  CB  PHE B   9      38.870 -34.147 -11.101  1.00 29.42           C  
ANISOU  912  CB  PHE B   9     3562   3679   3937   -421   -421    -51       C  
ATOM    913  CG  PHE B   9      38.575 -33.526  -9.761  1.00 34.83           C  
ANISOU  913  CG  PHE B   9     4217   4427   4592   -414   -309    160       C  
ATOM    914  CD1 PHE B   9      39.219 -32.361  -9.364  1.00 29.23           C  
ANISOU  914  CD1 PHE B   9     3606   3804   3697   -349   -187    180       C  
ATOM    915  CD2 PHE B   9      37.648 -34.100  -8.903  1.00 33.20           C  
ANISOU  915  CD2 PHE B   9     3867   4206   4541   -467   -335    336       C  
ATOM    916  CE1 PHE B   9      38.944 -31.777  -8.135  1.00 31.15           C  
ANISOU  916  CE1 PHE B   9     3817   4122   3898   -314   -101    329       C  
ATOM    917  CE2 PHE B   9      37.366 -33.523  -7.673  1.00 32.54           C  
ANISOU  917  CE2 PHE B   9     3739   4238   4388   -435   -225    515       C  
ATOM    918  CZ  PHE B   9      38.013 -32.362  -7.286  1.00 31.30           C  
ANISOU  918  CZ  PHE B   9     3691   4169   4031   -347   -112    489       C  
ATOM    919  N   LYS B  10      39.523 -32.864 -14.249  1.00 22.62           N  
ANISOU  919  N   LYS B  10     2894   3076   2623   -305   -454   -412       N  
ATOM    920  CA  LYS B  10      40.304 -33.181 -15.438  1.00 24.96           C  
ANISOU  920  CA  LYS B  10     3227   3453   2804   -260   -493   -619       C  
ATOM    921  C   LYS B  10      41.747 -33.511 -15.094  1.00 28.82           C  
ANISOU  921  C   LYS B  10     3745   3909   3296   -242   -419   -683       C  
ATOM    922  O   LYS B  10      42.386 -34.295 -15.803  1.00 38.31           O  
ANISOU  922  O   LYS B  10     4931   5127   4498   -198   -479   -890       O  
ATOM    923  CB  LYS B  10      40.255 -32.020 -16.429  1.00 32.55           C  
ANISOU  923  CB  LYS B  10     4253   4615   3500   -222   -453   -602       C  
ATOM    924  CG  LYS B  10      38.884 -31.822 -17.071  1.00 45.43           C  
ANISOU  924  CG  LYS B  10     5850   6298   5112   -223   -558   -589       C  
ATOM    925  CD  LYS B  10      38.841 -30.546 -17.894  1.00 54.21           C  
ANISOU  925  CD  LYS B  10     7027   7597   5975   -192   -517   -512       C  
ATOM    926  CE  LYS B  10      37.502 -30.374 -18.593  1.00 60.79           C  
ANISOU  926  CE  LYS B  10     7823   8491   6784   -185   -634   -507       C  
ATOM    927  NZ  LYS B  10      37.355 -28.998 -19.151  1.00 61.28           N1+
ANISOU  927  NZ  LYS B  10     7943   8698   6644   -164   -599   -365       N1+
ATOM    928  N   ARG B  11      42.265 -32.922 -14.020  1.00 25.06           N  
ANISOU  928  N   ARG B  11     3304   3397   2823   -261   -300   -527       N  
ATOM    929  CA  ARG B  11      43.535 -33.293 -13.409  1.00 28.02           C  
ANISOU  929  CA  ARG B  11     3690   3709   3249   -255   -238   -553       C  
ATOM    930  C   ARG B  11      43.313 -33.374 -11.909  1.00 26.69           C  
ANISOU  930  C   ARG B  11     3494   3418   3228   -295   -203   -379       C  
ATOM    931  O   ARG B  11      42.781 -32.434 -11.312  1.00 20.66           O  
ANISOU  931  O   ARG B  11     2751   2698   2402   -298   -141   -227       O  
ATOM    932  CB  ARG B  11      44.629 -32.275 -13.715  1.00 19.58           C  
ANISOU  932  CB  ARG B  11     2692   2774   1975   -228   -121   -536       C  
ATOM    933  CG  ARG B  11      44.915 -32.144 -15.175  1.00 20.76           C  
ANISOU  933  CG  ARG B  11     2848   3105   1934   -185   -135   -670       C  
ATOM    934  CD  ARG B  11      45.540 -33.418 -15.711  1.00 33.83           C  
ANISOU  934  CD  ARG B  11     4450   4753   3649   -133   -205   -910       C  
ATOM    935  NE  ARG B  11      46.700 -33.016 -16.477  1.00 44.47           N  
ANISOU  935  NE  ARG B  11     5805   6304   4787    -85   -118   -976       N  
ATOM    936  CZ  ARG B  11      47.952 -33.152 -16.080  1.00 35.20           C  
ANISOU  936  CZ  ARG B  11     4620   5124   3629    -71    -42   -998       C  
ATOM    937  NH1 ARG B  11      48.244 -33.751 -14.938  1.00 37.49           N1+
ANISOU  937  NH1 ARG B  11     4902   5205   4137    -93    -53   -976       N1+
ATOM    938  NH2 ARG B  11      48.916 -32.709 -16.855  1.00 38.22           N  
ANISOU  938  NH2 ARG B  11     4986   5731   3804    -33     42  -1029       N  
ATOM    939  N   LEU B  12      43.723 -34.487 -11.311  1.00 24.59           N  
ANISOU  939  N   LEU B  12     3174   3014   3154   -315   -250   -403       N  
ATOM    940  CA  LEU B  12      43.421 -34.806  -9.924  1.00 26.50           C  
ANISOU  940  CA  LEU B  12     3361   3163   3546   -358   -237   -220       C  
ATOM    941  C   LEU B  12      44.609 -34.483  -9.028  1.00 25.90           C  
ANISOU  941  C   LEU B  12     3330   3087   3426   -338   -136   -167       C  
ATOM    942  O   LEU B  12      45.743 -34.347  -9.487  1.00 27.47           O  
ANISOU  942  O   LEU B  12     3579   3309   3547   -304    -99   -287       O  
ATOM    943  CB  LEU B  12      43.046 -36.286  -9.787  1.00 29.10           C  
ANISOU  943  CB  LEU B  12     3583   3320   4152   -407   -382   -235       C  
ATOM    944  CG  LEU B  12      41.616 -36.702 -10.163  1.00 37.91           C  
ANISOU  944  CG  LEU B  12     4613   4402   5391   -456   -500   -201       C  
ATOM    945  CD1 LEU B  12      41.364 -36.627 -11.664  1.00 40.99           C  
ANISOU  945  CD1 LEU B  12     5037   4849   5688   -415   -580   -423       C  
ATOM    946  CD2 LEU B  12      41.318 -38.105  -9.644  1.00 43.82           C  
ANISOU  946  CD2 LEU B  12     5235   4948   6468   -531   -646   -131       C  
ATOM    947  N   LEU B  13      44.333 -34.356  -7.734  1.00 21.89           N  
ANISOU  947  N   LEU B  13     2787   2574   2956   -354    -92     17       N  
ATOM    948  CA  LEU B  13      45.417 -34.225  -6.769  1.00 25.18           C  
ANISOU  948  CA  LEU B  13     3230   2979   3356   -335    -24     66       C  
ATOM    949  C   LEU B  13      46.347 -35.427  -6.878  1.00 29.37           C  
ANISOU  949  C   LEU B  13     3731   3375   4055   -347    -93    -27       C  
ATOM    950  O   LEU B  13      45.899 -36.559  -7.076  1.00 28.01           O  
ANISOU  950  O   LEU B  13     3480   3081   4082   -385   -210    -42       O  
ATOM    951  CB  LEU B  13      44.861 -34.126  -5.350  1.00 28.52           C  
ANISOU  951  CB  LEU B  13     3594   3448   3793   -339     13    275       C  
ATOM    952  CG  LEU B  13      44.118 -32.863  -4.927  1.00 27.99           C  
ANISOU  952  CG  LEU B  13     3551   3530   3556   -289     86    351       C  
ATOM    953  CD1 LEU B  13      43.423 -33.121  -3.600  1.00 28.06           C  
ANISOU  953  CD1 LEU B  13     3453   3620   3588   -286    107    550       C  
ATOM    954  CD2 LEU B  13      45.072 -31.679  -4.821  1.00 24.49           C  
ANISOU  954  CD2 LEU B  13     3216   3130   2959   -228    153    281       C  
ATOM    955  N   ALA B  14      47.648 -35.178  -6.751  1.00 28.14           N  
ANISOU  955  N   ALA B  14     3626   3227   3839   -312    -37    -93       N  
ATOM    956  CA  ALA B  14      48.660 -36.223  -6.831  1.00 31.74           C  
ANISOU  956  CA  ALA B  14     4049   3565   4444   -302    -98   -200       C  
ATOM    957  C   ALA B  14      49.463 -36.258  -5.538  1.00 23.59           C  
ANISOU  957  C   ALA B  14     3011   2504   3447   -299    -58    -77       C  
ATOM    958  O   ALA B  14      49.734 -35.213  -4.939  1.00 23.70           O  
ANISOU  958  O   ALA B  14     3079   2621   3306   -280     36     -3       O  
ATOM    959  CB  ALA B  14      49.592 -36.001  -8.026  1.00 30.62           C  
ANISOU  959  CB  ALA B  14     3950   3491   4194   -249    -72   -417       C  
ATOM    960  N   ASN B  15      49.837 -37.464  -5.107  1.00 25.00           N  
ANISOU  960  N   ASN B  15     3121   2534   3843   -314   -151    -59       N  
ATOM    961  CA  ASN B  15      50.604 -37.614  -3.875  1.00 26.85           C  
ANISOU  961  CA  ASN B  15     3340   2745   4118   -311   -132     70       C  
ATOM    962  C   ASN B  15      51.908 -36.834  -3.953  1.00 32.71           C  
ANISOU  962  C   ASN B  15     4151   3562   4715   -257    -44    -38       C  
ATOM    963  O   ASN B  15      52.564 -36.787  -4.997  1.00 31.91           O  
ANISOU  963  O   ASN B  15     4070   3473   4581   -224    -34   -230       O  
ATOM    964  CB  ASN B  15      50.902 -39.086  -3.600  1.00 26.72           C  
ANISOU  964  CB  ASN B  15     3234   2530   4388   -333   -271     92       C  
ATOM    965  CG  ASN B  15      49.663 -39.865  -3.206  1.00 34.36           C  
ANISOU  965  CG  ASN B  15     4104   3412   5538   -411   -371    284       C  
ATOM    966  ND2 ASN B  15      49.661 -41.159  -3.512  1.00 36.69           N  
ANISOU  966  ND2 ASN B  15     4320   3488   6130   -438   -540    240       N  
ATOM    967  OD1 ASN B  15      48.716 -39.311  -2.638  1.00 25.90           O  
ANISOU  967  OD1 ASN B  15     3017   2470   4355   -444   -306    468       O  
ATOM    968  N   ALA B  16      52.288 -36.220  -2.838  1.00 23.99           N  
ANISOU  968  N   ALA B  16     3068   2525   3521   -246     16     88       N  
ATOM    969  CA  ALA B  16      53.450 -35.354  -2.817  1.00 26.03           C  
ANISOU  969  CA  ALA B  16     3384   2849   3658   -209     86     10       C  
ATOM    970  C   ALA B  16      54.285 -35.628  -1.580  1.00 29.35           C  
ANISOU  970  C   ALA B  16     3780   3242   4130   -192     69    103       C  
ATOM    971  O   ALA B  16      53.824 -36.201  -0.587  1.00 24.63           O  
ANISOU  971  O   ALA B  16     3132   2627   3600   -205     27    269       O  
ATOM    972  CB  ALA B  16      53.062 -33.869  -2.862  1.00 30.34           C  
ANISOU  972  CB  ALA B  16     4003   3523   4001   -199    165     29       C  
ATOM    973  N   GLU B  17      55.527 -35.179  -1.664  1.00 32.63           N  
ANISOU  973  N   GLU B  17     4220   3674   4505   -164    101     10       N  
ATOM    974  CA  GLU B  17      56.513 -35.365  -0.620  1.00 29.57           C  
ANISOU  974  CA  GLU B  17     3810   3264   4161   -141     78     64       C  
ATOM    975  C   GLU B  17      57.426 -34.150  -0.661  1.00 21.35           C  
ANISOU  975  C   GLU B  17     2818   2300   2994   -123    136     -5       C  
ATOM    976  O   GLU B  17      57.752 -33.658  -1.742  1.00 24.95           O  
ANISOU  976  O   GLU B  17     3289   2786   3403   -134    181   -115       O  
ATOM    977  CB  GLU B  17      57.277 -36.676  -0.854  1.00 38.27           C  
ANISOU  977  CB  GLU B  17     4841   4229   5469   -131      1     -3       C  
ATOM    978  CG  GLU B  17      58.477 -36.902   0.011  1.00 40.61           C  
ANISOU  978  CG  GLU B  17     5108   4497   5826   -101    -30     25       C  
ATOM    979  CD  GLU B  17      59.709 -36.194  -0.525  1.00 40.27           C  
ANISOU  979  CD  GLU B  17     5076   4508   5717    -76     27   -122       C  
ATOM    980  OE1 GLU B  17      60.047 -36.349  -1.722  1.00 38.94           O  
ANISOU  980  OE1 GLU B  17     4884   4345   5566    -63     51   -281       O  
ATOM    981  OE2 GLU B  17      60.315 -35.446   0.258  1.00 31.67           O1-
ANISOU  981  OE2 GLU B  17     4009   3476   4549    -67     44    -73       O1-
ATOM    982  N   CYS B  18      57.819 -33.656   0.509  1.00 24.43           N  
ANISOU  982  N   CYS B  18     3222   2731   3329    -97    125     70       N  
ATOM    983  CA  CYS B  18      58.784 -32.569   0.555  1.00 24.07           C  
ANISOU  983  CA  CYS B  18     3208   2722   3217    -87    144      6       C  
ATOM    984  C   CYS B  18      59.556 -32.636   1.862  1.00 26.41           C  
ANISOU  984  C   CYS B  18     3486   3024   3525    -48     90     58       C  
ATOM    985  O   CYS B  18      59.142 -33.286   2.827  1.00 30.42           O  
ANISOU  985  O   CYS B  18     3969   3552   4040    -22     53    171       O  
ATOM    986  CB  CYS B  18      58.116 -31.197   0.407  1.00 23.63           C  
ANISOU  986  CB  CYS B  18     3221   2732   3026    -87    171      4       C  
ATOM    987  SG  CYS B  18      57.303 -30.628   1.908  1.00 32.76           S  
ANISOU  987  SG  CYS B  18     4408   3978   4063    -16    135     90       S  
ATOM    988  N   GLN B  19      60.683 -31.940   1.874  1.00 20.44           N  
ANISOU  988  N   GLN B  19     2730   2264   2771    -47     82    -10       N  
ATOM    989  CA  GLN B  19      61.531 -31.812   3.044  1.00 22.57           C  
ANISOU  989  CA  GLN B  19     2985   2546   3045     -6     18     11       C  
ATOM    990  C   GLN B  19      61.045 -30.663   3.914  1.00 15.93           C  
ANISOU  990  C   GLN B  19     2204   1785   2065     42    -17     21       C  
ATOM    991  O   GLN B  19      60.702 -29.593   3.404  1.00 20.25           O  
ANISOU  991  O   GLN B  19     2799   2333   2562     28     -3    -31       O  
ATOM    992  CB  GLN B  19      62.971 -31.558   2.605  1.00 27.15           C  
ANISOU  992  CB  GLN B  19     3521   3084   3711    -31     12    -73       C  
ATOM    993  CG  GLN B  19      64.034 -32.068   3.538  1.00 35.08           C  
ANISOU  993  CG  GLN B  19     4472   4067   4790      4    -59    -59       C  
ATOM    994  CD  GLN B  19      65.402 -32.050   2.875  1.00 33.65           C  
ANISOU  994  CD  GLN B  19     4215   3853   4718    -25    -48   -141       C  
ATOM    995  NE2 GLN B  19      66.134 -33.156   2.988  1.00 35.14           N  
ANISOU  995  NE2 GLN B  19     4327   3996   5028      3    -76   -153       N  
ATOM    996  OE1 GLN B  19      65.778 -31.065   2.238  1.00 22.01           O  
ANISOU  996  OE1 GLN B  19     2738   2399   3227    -72    -18   -182       O  
ATOM    997  N   GLU B  20      61.016 -30.896   5.227  1.00 21.53           N  
ANISOU  997  N   GLU B  20     2902   2569   2711    110    -73     84       N  
ATOM    998  CA  GLU B  20      60.641 -29.863   6.184  1.00 19.37           C  
ANISOU  998  CA  GLU B  20     2671   2402   2288    193   -124     54       C  
ATOM    999  C   GLU B  20      61.320 -28.548   5.846  1.00 19.80           C  
ANISOU  999  C   GLU B  20     2765   2385   2375    182   -175    -78       C  
ATOM   1000  O   GLU B  20      62.535 -28.501   5.626  1.00 17.85           O  
ANISOU 1000  O   GLU B  20     2485   2056   2241    138   -206   -118       O  
ATOM   1001  CB  GLU B  20      61.034 -30.293   7.600  1.00 18.97           C  
ANISOU 1001  CB  GLU B  20     2582   2458   2168    272   -194    115       C  
ATOM   1002  CG  GLU B  20      60.644 -29.289   8.693  1.00 25.12           C  
ANISOU 1002  CG  GLU B  20     3393   3394   2759    395   -260     51       C  
ATOM   1003  CD  GLU B  20      61.695 -28.196   8.930  1.00 25.40           C  
ANISOU 1003  CD  GLU B  20     3458   3362   2832    425   -370   -114       C  
ATOM   1004  OE1 GLU B  20      62.904 -28.511   9.024  1.00 25.45           O  
ANISOU 1004  OE1 GLU B  20     3429   3291   2949    390   -418   -122       O  
ATOM   1005  OE2 GLU B  20      61.308 -27.010   9.014  1.00 23.12           O1-
ANISOU 1005  OE2 GLU B  20     3219   3084   2483    485   -425   -238       O1-
ATOM   1006  N   GLY B  21      60.532 -27.473   5.813  1.00 20.91           N  
ANISOU 1006  N   GLY B  21     2960   2550   2434    221   -194   -136       N  
ATOM   1007  CA  GLY B  21      61.027 -26.145   5.554  1.00 20.43           C  
ANISOU 1007  CA  GLY B  21     2932   2396   2434    209   -275   -242       C  
ATOM   1008  C   GLY B  21      60.896 -25.709   4.108  1.00 24.66           C  
ANISOU 1008  C   GLY B  21     3481   2833   3057    102   -218   -225       C  
ATOM   1009  O   GLY B  21      60.804 -24.504   3.838  1.00 26.91           O  
ANISOU 1009  O   GLY B  21     3799   3046   3380     95   -288   -275       O  
ATOM   1010  N   GLN B  22      60.880 -26.657   3.176  1.00 21.02           N  
ANISOU 1010  N   GLN B  22     2986   2370   2630     27   -108   -158       N  
ATOM   1011  CA  GLN B  22      60.601 -26.341   1.782  1.00 25.43           C  
ANISOU 1011  CA  GLN B  22     3551   2893   3220    -58    -43   -135       C  
ATOM   1012  C   GLN B  22      59.092 -26.206   1.556  1.00 21.49           C  
ANISOU 1012  C   GLN B  22     3102   2439   2623    -25    -10   -116       C  
ATOM   1013  O   GLN B  22      58.274 -26.490   2.431  1.00 22.16           O  
ANISOU 1013  O   GLN B  22     3202   2598   2619     58    -18   -109       O  
ATOM   1014  CB  GLN B  22      61.174 -27.417   0.860  1.00 15.29           C  
ANISOU 1014  CB  GLN B  22     2202   1617   1992   -123     48   -113       C  
ATOM   1015  CG  GLN B  22      62.684 -27.613   0.981  1.00 23.36           C  
ANISOU 1015  CG  GLN B  22     3149   2611   3114   -152     26   -132       C  
ATOM   1016  CD  GLN B  22      63.484 -26.596   0.180  1.00 26.79           C  
ANISOU 1016  CD  GLN B  22     3544   3020   3614   -236     19   -116       C  
ATOM   1017  NE2 GLN B  22      64.759 -26.451   0.516  1.00 33.12           N  
ANISOU 1017  NE2 GLN B  22     4277   3795   4512   -259    -29   -125       N  
ATOM   1018  OE1 GLN B  22      62.964 -25.957  -0.735  1.00 23.82           O  
ANISOU 1018  OE1 GLN B  22     3186   2655   3208   -286     51    -76       O  
ATOM   1019  N   SER B  23      58.732 -25.778   0.357  1.00 21.11           N  
ANISOU 1019  N   SER B  23     3067   2369   2586    -90     30    -93       N  
ATOM   1020  CA  SER B  23      57.345 -25.636  -0.054  1.00 14.59           C  
ANISOU 1020  CA  SER B  23     2280   1581   1684    -70     60    -72       C  
ATOM   1021  C   SER B  23      56.887 -26.865  -0.824  1.00 23.07           C  
ANISOU 1021  C   SER B  23     3323   2700   2742   -107    152    -41       C  
ATOM   1022  O   SER B  23      57.691 -27.624  -1.367  1.00 28.27           O  
ANISOU 1022  O   SER B  23     3934   3354   3454   -153    193    -52       O  
ATOM   1023  CB  SER B  23      57.159 -24.388  -0.925  1.00 16.24           C  
ANISOU 1023  CB  SER B  23     2519   1734   1918   -115     24    -55       C  
ATOM   1024  OG  SER B  23      57.462 -23.220  -0.180  1.00 29.17           O  
ANISOU 1024  OG  SER B  23     4184   3292   3608    -72    -99   -101       O  
ATOM   1025  N   VAL B  24      55.572 -27.054  -0.860  1.00 21.33           N  
ANISOU 1025  N   VAL B  24     3120   2524   2458    -76    171    -17       N  
ATOM   1026  CA  VAL B  24      54.962 -28.099  -1.665  1.00 22.36           C  
ANISOU 1026  CA  VAL B  24     3222   2677   2595   -112    226      1       C  
ATOM   1027  C   VAL B  24      53.699 -27.531  -2.298  1.00 24.40           C  
ANISOU 1027  C   VAL B  24     3513   2968   2791   -110    232     19       C  
ATOM   1028  O   VAL B  24      53.022 -26.673  -1.726  1.00 25.08           O  
ANISOU 1028  O   VAL B  24     3630   3073   2826    -52    196     27       O  
ATOM   1029  CB  VAL B  24      54.659 -29.376  -0.849  1.00 23.88           C  
ANISOU 1029  CB  VAL B  24     3368   2884   2821    -87    227     45       C  
ATOM   1030  CG1 VAL B  24      53.478 -29.162   0.075  1.00 22.28           C  
ANISOU 1030  CG1 VAL B  24     3166   2763   2538    -24    216    111       C  
ATOM   1031  CG2 VAL B  24      54.403 -30.557  -1.785  1.00 23.51           C  
ANISOU 1031  CG2 VAL B  24     3280   2806   2848   -134    248     32       C  
ATOM   1032  N   CYS B  25      53.398 -28.014  -3.498  1.00 24.30           N  
ANISOU 1032  N   CYS B  25     3485   2967   2779   -160    266      8       N  
ATOM   1033  CA  CYS B  25      52.304 -27.515  -4.310  1.00 25.88           C  
ANISOU 1033  CA  CYS B  25     3711   3202   2922   -167    266     25       C  
ATOM   1034  C   CYS B  25      51.429 -28.679  -4.754  1.00 28.71           C  
ANISOU 1034  C   CYS B  25     4030   3580   3300   -179    277     18       C  
ATOM   1035  O   CYS B  25      51.936 -29.753  -5.096  1.00 35.49           O  
ANISOU 1035  O   CYS B  25     4848   4417   4222   -201    284    -32       O  
ATOM   1036  CB  CYS B  25      52.853 -26.752  -5.528  1.00 32.12           C  
ANISOU 1036  CB  CYS B  25     4515   4009   3681   -221    277     27       C  
ATOM   1037  SG  CYS B  25      51.614 -25.969  -6.566  1.00 47.75           S  
ANISOU 1037  SG  CYS B  25     6525   6032   5585   -231    258     72       S  
ATOM   1038  N   PHE B  26      50.115 -28.467  -4.705  1.00 27.62           N  
ANISOU 1038  N   PHE B  26     3894   3475   3127   -157    263     58       N  
ATOM   1039  CA  PHE B  26      49.116 -29.373  -5.259  1.00 23.50           C  
ANISOU 1039  CA  PHE B  26     3328   2964   2636   -179    251     60       C  
ATOM   1040  C   PHE B  26      48.358 -28.624  -6.347  1.00 26.61           C  
ANISOU 1040  C   PHE B  26     3753   3403   2954   -187    241     51       C  
ATOM   1041  O   PHE B  26      47.975 -27.468  -6.147  1.00 29.91           O  
ANISOU 1041  O   PHE B  26     4210   3840   3316   -153    231     89       O  
ATOM   1042  CB  PHE B  26      48.143 -29.850  -4.180  1.00 24.31           C  
ANISOU 1042  CB  PHE B  26     3376   3090   2772   -152    240    151       C  
ATOM   1043  CG  PHE B  26      48.761 -30.765  -3.166  1.00 31.47           C  
ANISOU 1043  CG  PHE B  26     4235   3965   3757   -154    238    198       C  
ATOM   1044  CD1 PHE B  26      48.799 -32.137  -3.381  1.00 31.67           C  
ANISOU 1044  CD1 PHE B  26     4198   3914   3922   -203    201    205       C  
ATOM   1045  CD2 PHE B  26      49.298 -30.257  -1.995  1.00 32.55           C  
ANISOU 1045  CD2 PHE B  26     4385   4140   3840   -100    252    231       C  
ATOM   1046  CE1 PHE B  26      49.362 -32.988  -2.443  1.00 31.82           C  
ANISOU 1046  CE1 PHE B  26     4166   3889   4035   -208    182    275       C  
ATOM   1047  CE2 PHE B  26      49.868 -31.102  -1.056  1.00 37.49           C  
ANISOU 1047  CE2 PHE B  26     4964   4754   4529   -100    243    294       C  
ATOM   1048  CZ  PHE B  26      49.900 -32.468  -1.279  1.00 35.53           C  
ANISOU 1048  CZ  PHE B  26     4650   4422   4427   -159    210    331       C  
ATOM   1049  N   GLU B  27      48.159 -29.264  -7.497  1.00 28.51           N  
ANISOU 1049  N   GLU B  27     3974   3662   3196   -220    227    -10       N  
ATOM   1050  CA  GLU B  27      47.536 -28.628  -8.654  1.00 27.21           C  
ANISOU 1050  CA  GLU B  27     3833   3564   2942   -229    212    -16       C  
ATOM   1051  C   GLU B  27      46.395 -29.488  -9.180  1.00 34.77           C  
ANISOU 1051  C   GLU B  27     4743   4531   3936   -237    162    -49       C  
ATOM   1052  O   GLU B  27      46.545 -30.702  -9.335  1.00 32.25           O  
ANISOU 1052  O   GLU B  27     4377   4169   3709   -252    131   -125       O  
ATOM   1053  CB  GLU B  27      48.557 -28.394  -9.782  1.00 31.10           C  
ANISOU 1053  CB  GLU B  27     4338   4125   3351   -254    238    -66       C  
ATOM   1054  CG  GLU B  27      49.673 -27.399  -9.452  1.00 41.67           C  
ANISOU 1054  CG  GLU B  27     5708   5456   4670   -267    273     -6       C  
ATOM   1055  CD  GLU B  27      50.888 -27.515 -10.380  1.00 55.93           C  
ANISOU 1055  CD  GLU B  27     7482   7355   6413   -296    318    -44       C  
ATOM   1056  OE1 GLU B  27      51.937 -26.909 -10.060  1.00 62.54           O  
ANISOU 1056  OE1 GLU B  27     8318   8177   7266   -319    343      8       O  
ATOM   1057  OE2 GLU B  27      50.804 -28.210 -11.418  1.00 53.31           O1-
ANISOU 1057  OE2 GLU B  27     7114   7127   6015   -288    323   -133       O1-
ATOM   1058  N   ILE B  28      45.257 -28.854  -9.472  1.00 27.07           N  
ANISOU 1058  N   ILE B  28     3774   3597   2913   -226    134      1       N  
ATOM   1059  CA  ILE B  28      44.104 -29.550 -10.031  1.00 28.98           C  
ANISOU 1059  CA  ILE B  28     3965   3852   3196   -239     72    -26       C  
ATOM   1060  C   ILE B  28      43.514 -28.735 -11.170  1.00 29.25           C  
ANISOU 1060  C   ILE B  28     4029   3973   3110   -232     43    -26       C  
ATOM   1061  O   ILE B  28      43.697 -27.518 -11.268  1.00 19.12           O  
ANISOU 1061  O   ILE B  28     2801   2722   1743   -216     63     40       O  
ATOM   1062  CB  ILE B  28      42.998 -29.815  -8.987  1.00 25.43           C  
ANISOU 1062  CB  ILE B  28     3448   3379   2837   -231     57     72       C  
ATOM   1063  CG1 ILE B  28      42.560 -28.492  -8.357  1.00 26.75           C  
ANISOU 1063  CG1 ILE B  28     3646   3595   2924   -172     89    154       C  
ATOM   1064  CG2 ILE B  28      43.467 -30.799  -7.934  1.00 28.91           C  
ANISOU 1064  CG2 ILE B  28     3836   3750   3400   -249     70    106       C  
ATOM   1065  CD1 ILE B  28      41.203 -28.535  -7.774  1.00 18.40           C  
ANISOU 1065  CD1 ILE B  28     2506   2587   1900   -145     73    235       C  
ATOM   1066  N   ARG B  29      42.782 -29.432 -12.030  1.00 17.46           N  
ANISOU 1066  N   ARG B  29     2496   2509   1630   -244    -26    -97       N  
ATOM   1067  CA  ARG B  29      41.886 -28.809 -12.990  1.00 18.07           C  
ANISOU 1067  CA  ARG B  29     2583   2674   1611   -234    -76    -81       C  
ATOM   1068  C   ARG B  29      40.524 -29.459 -12.818  1.00 23.80           C  
ANISOU 1068  C   ARG B  29     3229   3364   2449   -242   -152    -74       C  
ATOM   1069  O   ARG B  29      40.412 -30.687 -12.880  1.00 22.67           O  
ANISOU 1069  O   ARG B  29     3025   3161   2428   -270   -210   -156       O  
ATOM   1070  CB  ARG B  29      42.397 -28.959 -14.425  1.00 23.28           C  
ANISOU 1070  CB  ARG B  29     3258   3453   2135   -232    -99   -187       C  
ATOM   1071  CG  ARG B  29      43.525 -28.002 -14.778  1.00 19.37           C  
ANISOU 1071  CG  ARG B  29     2818   3042   1500   -235    -25   -127       C  
ATOM   1072  CD  ARG B  29      43.920 -28.071 -16.258  1.00 21.43           C  
ANISOU 1072  CD  ARG B  29     3070   3496   1578   -224    -36   -201       C  
ATOM   1073  NE  ARG B  29      42.807 -27.779 -17.172  1.00 24.08           N  
ANISOU 1073  NE  ARG B  29     3398   3928   1821   -212   -117   -185       N  
ATOM   1074  CZ  ARG B  29      42.358 -26.557 -17.457  1.00 33.16           C  
ANISOU 1074  CZ  ARG B  29     4581   5123   2895   -221   -130    -21       C  
ATOM   1075  NH1 ARG B  29      42.911 -25.487 -16.892  1.00 20.80           N1+
ANISOU 1075  NH1 ARG B  29     3057   3496   1352   -244    -79    134       N1+
ATOM   1076  NH2 ARG B  29      41.348 -26.400 -18.307  1.00 28.68           N  
ANISOU 1076  NH2 ARG B  29     4000   4648   2247   -204   -214    -15       N  
ATOM   1077  N   VAL B  30      39.501 -28.644 -12.577  1.00 18.53           N  
ANISOU 1077  N   VAL B  30     2550   2724   1766   -218   -163     26       N  
ATOM   1078  CA  VAL B  30      38.138 -29.128 -12.395  1.00 30.55           C  
ANISOU 1078  CA  VAL B  30     3975   4240   3392   -227   -228     60       C  
ATOM   1079  C   VAL B  30      37.198 -28.249 -13.208  1.00 37.14           C  
ANISOU 1079  C   VAL B  30     4821   5156   4136   -196   -283     87       C  
ATOM   1080  O   VAL B  30      37.349 -27.022 -13.243  1.00 31.30           O  
ANISOU 1080  O   VAL B  30     4146   4448   3298   -153   -255    147       O  
ATOM   1081  CB  VAL B  30      37.730 -29.150 -10.905  1.00 30.13           C  
ANISOU 1081  CB  VAL B  30     3853   4163   3431   -212   -172    179       C  
ATOM   1082  CG1 VAL B  30      37.883 -27.770 -10.279  1.00 23.49           C  
ANISOU 1082  CG1 VAL B  30     3072   3363   2491   -135   -108    239       C  
ATOM   1083  CG2 VAL B  30      36.304 -29.674 -10.737  1.00 36.17           C  
ANISOU 1083  CG2 VAL B  30     4485   4951   4308   -233   -233    247       C  
ATOM   1084  N   SER B  31      36.239 -28.878 -13.873  1.00 36.81           N  
ANISOU 1084  N   SER B  31     4707   5132   4146   -219   -382     44       N  
ATOM   1085  CA  SER B  31      35.284 -28.203 -14.735  1.00 40.81           C  
ANISOU 1085  CA  SER B  31     5210   5720   4575   -192   -457     62       C  
ATOM   1086  C   SER B  31      33.884 -28.340 -14.152  1.00 37.53           C  
ANISOU 1086  C   SER B  31     4672   5302   4285   -188   -497    143       C  
ATOM   1087  O   SER B  31      33.672 -28.998 -13.130  1.00 32.31           O  
ANISOU 1087  O   SER B  31     3922   4595   3761   -214   -464    199       O  
ATOM   1088  CB  SER B  31      35.342 -28.785 -16.147  1.00 43.99           C  
ANISOU 1088  CB  SER B  31     5623   6184   4906   -210   -556    -76       C  
ATOM   1089  OG  SER B  31      35.071 -30.178 -16.107  1.00 42.57           O  
ANISOU 1089  OG  SER B  31     5358   5926   4893   -255   -637   -177       O  
ATOM   1090  N   GLY B  32      32.926 -27.726 -14.819  1.00 34.34           N  
ANISOU 1090  N   GLY B  32     4249   4966   3832   -156   -571    166       N  
ATOM   1091  CA  GLY B  32      31.532 -27.842 -14.432  1.00 37.71           C  
ANISOU 1091  CA  GLY B  32     4539   5416   4372   -148   -618    238       C  
ATOM   1092  C   GLY B  32      30.778 -26.558 -14.709  1.00 35.13           C  
ANISOU 1092  C   GLY B  32     4225   5161   3962    -65   -646    299       C  
ATOM   1093  O   GLY B  32      31.315 -25.454 -14.675  1.00 30.53           O  
ANISOU 1093  O   GLY B  32     3744   4578   3279     -6   -606    328       O  
ATOM   1094  N   ILE B  33      29.485 -26.709 -14.995  1.00 30.24           N  
ANISOU 1094  N   ILE B  33     3488   4589   3413    -63   -737    324       N  
ATOM   1095  CA  ILE B  33      28.610 -25.589 -15.305  1.00 31.20           C  
ANISOU 1095  CA  ILE B  33     3598   4774   3484     22   -789    378       C  
ATOM   1096  C   ILE B  33      27.405 -25.655 -14.370  1.00 37.55           C  
ANISOU 1096  C   ILE B  33     4224   5633   4410     62   -773    458       C  
ATOM   1097  O   ILE B  33      26.698 -26.664 -14.354  1.00 39.26           O  
ANISOU 1097  O   ILE B  33     4302   5863   4754    -11   -822    474       O  
ATOM   1098  CB  ILE B  33      28.149 -25.597 -16.770  1.00 33.11           C  
ANISOU 1098  CB  ILE B  33     3858   5063   3658      3   -933    328       C  
ATOM   1099  CG1 ILE B  33      29.348 -25.406 -17.697  1.00 29.94           C  
ANISOU 1099  CG1 ILE B  33     3612   4672   3091    -18   -932    271       C  
ATOM   1100  CG2 ILE B  33      27.090 -24.525 -17.006  1.00 38.28           C  
ANISOU 1100  CG2 ILE B  33     4472   5774   4299     91  -1004    402       C  
ATOM   1101  CD1 ILE B  33      29.025 -25.655 -19.161  1.00 35.56           C  
ANISOU 1101  CD1 ILE B  33     4333   5478   3699    -35  -1069    199       C  
ATOM   1102  N   PRO B  34      27.146 -24.624 -13.549  1.00 41.52           N  
ANISOU 1102  N   PRO B  34     4710   6178   4888    181   -713    509       N  
ATOM   1103  CA  PRO B  34      28.001 -23.444 -13.358  1.00 43.13           C  
ANISOU 1103  CA  PRO B  34     5061   6331   4996    266   -673    492       C  
ATOM   1104  C   PRO B  34      29.342 -23.816 -12.715  1.00 38.17           C  
ANISOU 1104  C   PRO B  34     4521   5638   4342    222   -565    466       C  
ATOM   1105  O   PRO B  34      29.452 -24.921 -12.182  1.00 37.67           O  
ANISOU 1105  O   PRO B  34     4384   5585   4343    150   -510    476       O  
ATOM   1106  CB  PRO B  34      27.157 -22.547 -12.440  1.00 45.31           C  
ANISOU 1106  CB  PRO B  34     5240   6677   5300    419   -656    518       C  
ATOM   1107  CG  PRO B  34      26.196 -23.468 -11.775  1.00 42.48           C  
ANISOU 1107  CG  PRO B  34     4676   6440   5026    397   -613    572       C  
ATOM   1108  CD  PRO B  34      25.893 -24.526 -12.779  1.00 39.25           C  
ANISOU 1108  CD  PRO B  34     4232   6002   4678    253   -699    578       C  
ATOM   1109  N   PRO B  35      30.341 -22.940 -12.798  1.00 37.91           N  
ANISOU 1109  N   PRO B  35     4634   5534   4237    254   -551    448       N  
ATOM   1110  CA  PRO B  35      31.660 -23.261 -12.235  1.00 36.38           C  
ANISOU 1110  CA  PRO B  35     4521   5280   4021    212   -457    421       C  
ATOM   1111  C   PRO B  35      31.537 -23.630 -10.767  1.00 32.02           C  
ANISOU 1111  C   PRO B  35     3873   4776   3517    259   -361    433       C  
ATOM   1112  O   PRO B  35      30.867 -22.929  -9.999  1.00 27.60           O  
ANISOU 1112  O   PRO B  35     3244   4283   2961    383   -353    441       O  
ATOM   1113  CB  PRO B  35      32.448 -21.955 -12.418  1.00 39.07           C  
ANISOU 1113  CB  PRO B  35     4994   5540   4311    264   -483    427       C  
ATOM   1114  CG  PRO B  35      31.753 -21.243 -13.532  1.00 31.58           C  
ANISOU 1114  CG  PRO B  35     4058   4601   3338    283   -602    471       C  
ATOM   1115  CD  PRO B  35      30.304 -21.587 -13.383  1.00 38.04           C  
ANISOU 1115  CD  PRO B  35     4733   5507   4213    327   -636    472       C  
ATOM   1116  N   PRO B  36      32.141 -24.735 -10.341  1.00 31.67           N  
ANISOU 1116  N   PRO B  36     3810   4720   3505    173   -294    437       N  
ATOM   1117  CA  PRO B  36      31.899 -25.218  -8.977  1.00 33.94           C  
ANISOU 1117  CA  PRO B  36     3976   5092   3828    204   -207    492       C  
ATOM   1118  C   PRO B  36      32.648 -24.420  -7.926  1.00 34.67           C  
ANISOU 1118  C   PRO B  36     4130   5193   3851    311   -140    459       C  
ATOM   1119  O   PRO B  36      33.667 -23.777  -8.197  1.00 30.62           O  
ANISOU 1119  O   PRO B  36     3761   4573   3299    316   -153    399       O  
ATOM   1120  CB  PRO B  36      32.396 -26.666  -9.022  1.00 32.61           C  
ANISOU 1120  CB  PRO B  36     3779   4869   3741     65   -191    516       C  
ATOM   1121  CG  PRO B  36      33.360 -26.701 -10.144  1.00 32.45           C  
ANISOU 1121  CG  PRO B  36     3908   4736   3687      2   -235    423       C  
ATOM   1122  CD  PRO B  36      32.846 -25.733 -11.162  1.00 31.23           C  
ANISOU 1122  CD  PRO B  36     3805   4595   3465     47   -314    397       C  
ATOM   1123  N   THR B  37      32.128 -24.472  -6.703  1.00 31.27           N  
ANISOU 1123  N   THR B  37     3572   4909   3402    398    -73    502       N  
ATOM   1124  CA  THR B  37      32.870 -23.968  -5.561  1.00 30.74           C  
ANISOU 1124  CA  THR B  37     3542   4879   3260    501    -11    456       C  
ATOM   1125  C   THR B  37      33.613 -25.116  -4.893  1.00 32.71           C  
ANISOU 1125  C   THR B  37     3764   5141   3525    405     67    527       C  
ATOM   1126  O   THR B  37      33.188 -26.273  -4.939  1.00 28.92           O  
ANISOU 1126  O   THR B  37     3172   4693   3123    295     82    638       O  
ATOM   1127  CB  THR B  37      31.954 -23.263  -4.560  1.00 36.15           C  
ANISOU 1127  CB  THR B  37     4100   5760   3876    688     14    437       C  
ATOM   1128  CG2 THR B  37      31.309 -22.058  -5.222  1.00 33.82           C  
ANISOU 1128  CG2 THR B  37     3843   5415   3594    796    -89    352       C  
ATOM   1129  OG1 THR B  37      30.933 -24.162  -4.113  1.00 34.24           O  
ANISOU 1129  OG1 THR B  37     3651   5710   3647    660     74    573       O  
ATOM   1130  N   LEU B  38      34.749 -24.785  -4.298  1.00 20.38           N  
ANISOU 1130  N   LEU B  38     2302   3532   1911    443     97    465       N  
ATOM   1131  CA  LEU B  38      35.667 -25.767  -3.761  1.00 27.81           C  
ANISOU 1131  CA  LEU B  38     3246   4450   2871    355    154    519       C  
ATOM   1132  C   LEU B  38      35.691 -25.649  -2.248  1.00 32.49           C  
ANISOU 1132  C   LEU B  38     3753   5229   3361    475    227    548       C  
ATOM   1133  O   LEU B  38      35.565 -24.550  -1.699  1.00 33.32           O  
ANISOU 1133  O   LEU B  38     3874   5415   3371    641    217    445       O  
ATOM   1134  CB  LEU B  38      37.074 -25.566  -4.342  1.00 30.11           C  
ANISOU 1134  CB  LEU B  38     3712   4552   3178    294    128    429       C  
ATOM   1135  CG  LEU B  38      37.406 -26.242  -5.685  1.00 30.83           C  
ANISOU 1135  CG  LEU B  38     3862   4504   3348    150     85    420       C  
ATOM   1136  CD1 LEU B  38      36.394 -25.910  -6.766  1.00 35.48           C  
ANISOU 1136  CD1 LEU B  38     4437   5095   3950    144     17    412       C  
ATOM   1137  CD2 LEU B  38      38.802 -25.866  -6.157  1.00 23.36           C  
ANISOU 1137  CD2 LEU B  38     3062   3431   2384    117     77    340       C  
ATOM   1138  N   LYS B  39      35.804 -26.793  -1.582  1.00 27.35           N  
ANISOU 1138  N   LYS B  39     3000   4656   2735    398    285    689       N  
ATOM   1139  CA  LYS B  39      36.140 -26.853  -0.169  1.00 26.74           C  
ANISOU 1139  CA  LYS B  39     2856   4761   2542    488    356    737       C  
ATOM   1140  C   LYS B  39      37.378 -27.721  -0.038  1.00 30.56           C  
ANISOU 1140  C   LYS B  39     3408   5110   3093    370    362    779       C  
ATOM   1141  O   LYS B  39      37.467 -28.779  -0.669  1.00 29.14           O  
ANISOU 1141  O   LYS B  39     3212   4795   3063    212    336    865       O  
ATOM   1142  CB  LYS B  39      34.990 -27.416   0.668  1.00 29.50           C  
ANISOU 1142  CB  LYS B  39     2972   5394   2843    516    425    926       C  
ATOM   1143  CG  LYS B  39      33.732 -26.555   0.618  1.00 35.24           C  
ANISOU 1143  CG  LYS B  39     3605   6290   3495    657    424    875       C  
ATOM   1144  CD  LYS B  39      32.723 -26.959   1.672  1.00 53.97           C  
ANISOU 1144  CD  LYS B  39     5723   9019   5766    723    516   1059       C  
ATOM   1145  CE  LYS B  39      32.562 -25.866   2.709  1.00 64.81           C  
ANISOU 1145  CE  LYS B  39     7055  10661   6909    986    557    917       C  
ATOM   1146  NZ  LYS B  39      32.215 -24.567   2.069  1.00 66.25           N1+
ANISOU 1146  NZ  LYS B  39     7339  10741   7094   1126    474    680       N1+
ATOM   1147  N   TRP B  40      38.336 -27.258   0.752  1.00 24.22           N  
ANISOU 1147  N   TRP B  40     2678   4332   2192    457    378    699       N  
ATOM   1148  CA  TRP B  40      39.585 -27.964   0.966  1.00 27.35           C  
ANISOU 1148  CA  TRP B  40     3138   4610   2643    368    380    726       C  
ATOM   1149  C   TRP B  40      39.597 -28.497   2.388  1.00 26.19           C  
ANISOU 1149  C   TRP B  40     2862   4693   2395    418    442    873       C  
ATOM   1150  O   TRP B  40      39.157 -27.814   3.317  1.00 27.90           O  
ANISOU 1150  O   TRP B  40     3012   5155   2435    583    479    845       O  
ATOM   1151  CB  TRP B  40      40.784 -27.043   0.728  1.00 20.04           C  
ANISOU 1151  CB  TRP B  40     2391   3528   1696    412    337    536       C  
ATOM   1152  CG  TRP B  40      40.798 -26.375  -0.624  1.00 26.87           C  
ANISOU 1152  CG  TRP B  40     3369   4209   2631    372    278    424       C  
ATOM   1153  CD1 TRP B  40      40.092 -25.253  -1.005  1.00 25.59           C  
ANISOU 1153  CD1 TRP B  40     3232   4059   2433    465    236    338       C  
ATOM   1154  CD2 TRP B  40      41.566 -26.768  -1.767  1.00 26.05           C  
ANISOU 1154  CD2 TRP B  40     3358   3905   2634    239    250    395       C  
ATOM   1155  CE2 TRP B  40      41.278 -25.850  -2.802  1.00 27.54           C  
ANISOU 1155  CE2 TRP B  40     3621   4016   2826    248    199    317       C  
ATOM   1156  CE3 TRP B  40      42.462 -27.812  -2.021  1.00 26.21           C  
ANISOU 1156  CE3 TRP B  40     3395   3820   2743    125    257    423       C  
ATOM   1157  NE1 TRP B  40      40.380 -24.937  -2.310  1.00 28.69           N  
ANISOU 1157  NE1 TRP B  40     3728   4272   2901    382    183    289       N  
ATOM   1158  CZ2 TRP B  40      41.856 -25.946  -4.068  1.00 24.69           C  
ANISOU 1158  CZ2 TRP B  40     3342   3517   2522    146    171    282       C  
ATOM   1159  CZ3 TRP B  40      43.038 -27.900  -3.283  1.00 23.22           C  
ANISOU 1159  CZ3 TRP B  40     3099   3297   2427     40    227    352       C  
ATOM   1160  CH2 TRP B  40      42.732 -26.974  -4.286  1.00 23.62           C  
ANISOU 1160  CH2 TRP B  40     3214   3314   2447     50    191    289       C  
ATOM   1161  N   GLU B  41      40.073 -29.726   2.548  1.00 24.12           N  
ANISOU 1161  N   GLU B  41     2556   4366   2245    286    444   1029       N  
ATOM   1162  CA  GLU B  41      40.109 -30.382   3.846  1.00 24.04           C  
ANISOU 1162  CA  GLU B  41     2407   4571   2154    305    495   1226       C  
ATOM   1163  C   GLU B  41      41.460 -31.035   4.062  1.00 26.32           C  
ANISOU 1163  C   GLU B  41     2773   4703   2525    232    464   1241       C  
ATOM   1164  O   GLU B  41      42.135 -31.439   3.110  1.00 25.48           O  
ANISOU 1164  O   GLU B  41     2769   4320   2592    121    408   1164       O  
ATOM   1165  CB  GLU B  41      39.037 -31.455   3.977  1.00 26.47           C  
ANISOU 1165  CB  GLU B  41     2511   4980   2567    198    508   1499       C  
ATOM   1166  CG  GLU B  41      37.630 -30.935   4.035  1.00 36.16           C  
ANISOU 1166  CG  GLU B  41     3614   6412   3714    280    538   1515       C  
ATOM   1167  CD  GLU B  41      36.628 -32.058   4.048  1.00 52.85           C  
ANISOU 1167  CD  GLU B  41     5530   8557   5993    149    511   1768       C  
ATOM   1168  OE1 GLU B  41      37.044 -33.213   3.808  1.00 52.92           O  
ANISOU 1168  OE1 GLU B  41     5523   8374   6211    -14    451   1903       O  
ATOM   1169  OE2 GLU B  41      35.432 -31.791   4.295  1.00 68.01           O1-
ANISOU 1169  OE2 GLU B  41     7309  10683   7848    214    532   1827       O1-
ATOM   1170  N   LYS B  42      41.839 -31.144   5.330  1.00 28.03           N  
ANISOU 1170  N   LYS B  42     2928   5107   2617    306    491   1321       N  
ATOM   1171  CA  LYS B  42      42.973 -31.954   5.751  1.00 28.93           C  
ANISOU 1171  CA  LYS B  42     3064   5120   2809    235    461   1402       C  
ATOM   1172  C   LYS B  42      42.452 -33.001   6.727  1.00 33.66           C  
ANISOU 1172  C   LYS B  42     3469   5855   3466    190    449   1643       C  
ATOM   1173  O   LYS B  42      41.993 -32.659   7.822  1.00 34.97           O  
ANISOU 1173  O   LYS B  42     3529   6287   3472    310    476   1666       O  
ATOM   1174  CB  LYS B  42      44.066 -31.103   6.393  1.00 29.69           C  
ANISOU 1174  CB  LYS B  42     3276   5263   2744    366    457   1226       C  
ATOM   1175  CG  LYS B  42      45.352 -31.880   6.611  1.00 30.46           C  
ANISOU 1175  CG  LYS B  42     3416   5216   2940    289    417   1284       C  
ATOM   1176  CD  LYS B  42      46.225 -31.280   7.693  1.00 36.31           C  
ANISOU 1176  CD  LYS B  42     4198   6096   3501    424    408   1189       C  
ATOM   1177  CE  LYS B  42      47.499 -32.105   7.859  1.00 37.39           C  
ANISOU 1177  CE  LYS B  42     4368   6077   3761    341    359   1254       C  
ATOM   1178  NZ  LYS B  42      47.734 -32.446   9.284  1.00 35.32           N1+
ANISOU 1178  NZ  LYS B  42     4004   6033   3382    407    354   1376       N1+
ATOM   1179  N   ASP B  43      42.498 -34.268   6.316  1.00 32.99           N  
ANISOU 1179  N   ASP B  43     3326   5588   3622     23    393   1819       N  
ATOM   1180  CA  ASP B  43      42.115 -35.393   7.166  1.00 41.97           C  
ANISOU 1180  CA  ASP B  43     4277   6809   4860    -40    351   2073       C  
ATOM   1181  C   ASP B  43      40.695 -35.223   7.713  1.00 42.96           C  
ANISOU 1181  C   ASP B  43     4224   7210   4889     18    386   2186       C  
ATOM   1182  O   ASP B  43      40.437 -35.397   8.905  1.00 40.91           O  
ANISOU 1182  O   ASP B  43     3820   7202   4523     82    399   2320       O  
ATOM   1183  CB  ASP B  43      43.133 -35.582   8.296  1.00 45.77           C  
ANISOU 1183  CB  ASP B  43     4755   7377   5257     13    345   2111       C  
ATOM   1184  CG  ASP B  43      44.541 -35.862   7.775  1.00 50.71           C  
ANISOU 1184  CG  ASP B  43     5536   7731   6001    -48    300   2029       C  
ATOM   1185  OD1 ASP B  43      44.730 -36.869   7.054  1.00 51.64           O  
ANISOU 1185  OD1 ASP B  43     5647   7586   6387   -190    220   2111       O  
ATOM   1186  OD2 ASP B  43      45.460 -35.069   8.074  1.00 48.18           O1-
ANISOU 1186  OD2 ASP B  43     5338   7453   5517     53    328   1872       O1-
ATOM   1187  N   GLY B  44      39.767 -34.870   6.824  1.00 35.94           N  
ANISOU 1187  N   GLY B  44     3335   6289   4032     -1    399   2137       N  
ATOM   1188  CA  GLY B  44      38.366 -34.756   7.176  1.00 35.82           C  
ANISOU 1188  CA  GLY B  44     3145   6514   3953     43    421   2253       C  
ATOM   1189  C   GLY B  44      37.965 -33.467   7.857  1.00 39.60           C  
ANISOU 1189  C   GLY B  44     3615   7288   4143    252    498   2104       C  
ATOM   1190  O   GLY B  44      36.795 -33.317   8.222  1.00 46.38           O  
ANISOU 1190  O   GLY B  44     4318   8379   4926    312    518   2196       O  
ATOM   1191  N   GLN B  45      38.889 -32.536   8.041  1.00 40.15           N  
ANISOU 1191  N   GLN B  45     3842   7351   4063    372    524   1872       N  
ATOM   1192  CA  GLN B  45      38.642 -31.277   8.713  1.00 38.02           C  
ANISOU 1192  CA  GLN B  45     3575   7321   3548    588    560   1687       C  
ATOM   1193  C   GLN B  45      38.874 -30.119   7.752  1.00 36.87           C  
ANISOU 1193  C   GLN B  45     3618   7023   3366    655    562   1414       C  
ATOM   1194  O   GLN B  45      39.782 -30.176   6.915  1.00 36.67           O  
ANISOU 1194  O   GLN B  45     3758   6737   3438    565    543   1335       O  
ATOM   1195  CB  GLN B  45      39.571 -31.120   9.919  1.00 47.47           C  
ANISOU 1195  CB  GLN B  45     4779   8649   4607    693    556   1640       C  
ATOM   1196  CG  GLN B  45      38.899 -30.822  11.233  1.00 63.13           C  
ANISOU 1196  CG  GLN B  45     6581  11012   6392    858    575   1687       C  
ATOM   1197  CD  GLN B  45      39.925 -30.633  12.327  1.00 69.06           C  
ANISOU 1197  CD  GLN B  45     7354  11874   7011    961    563   1615       C  
ATOM   1198  NE2 GLN B  45      39.629 -29.758  13.284  1.00 78.24           N  
ANISOU 1198  NE2 GLN B  45     8444  13326   7956   1176    563   1484       N  
ATOM   1199  OE1 GLN B  45      40.981 -31.266  12.305  1.00 58.90           O  
ANISOU 1199  OE1 GLN B  45     6144  10415   5819    854    544   1670       O  
ATOM   1200  N   PRO B  46      38.086 -29.051   7.862  1.00 32.89           N  
ANISOU 1200  N   PRO B  46     3089   6684   2724    819    573   1269       N  
ATOM   1201  CA  PRO B  46      38.289 -27.892   6.984  1.00 33.38           C  
ANISOU 1201  CA  PRO B  46     3323   6599   2761    896    554   1014       C  
ATOM   1202  C   PRO B  46      39.719 -27.383   7.081  1.00 38.27           C  
ANISOU 1202  C   PRO B  46     4125   7062   3353    934    514    830       C  
ATOM   1203  O   PRO B  46      40.312 -27.339   8.160  1.00 37.11           O  
ANISOU 1203  O   PRO B  46     3956   7027   3117   1015    497    803       O  
ATOM   1204  CB  PRO B  46      37.286 -26.864   7.517  1.00 42.64           C  
ANISOU 1204  CB  PRO B  46     4405   8020   3778   1107    548    890       C  
ATOM   1205  CG  PRO B  46      36.268 -27.675   8.268  1.00 39.18           C  
ANISOU 1205  CG  PRO B  46     3732   7845   3309   1088    584   1136       C  
ATOM   1206  CD  PRO B  46      37.023 -28.825   8.853  1.00 32.78           C  
ANISOU 1206  CD  PRO B  46     2883   7010   2564    959    590   1330       C  
ATOM   1207  N   LEU B  47      40.284 -27.024   5.932  1.00 30.92           N  
ANISOU 1207  N   LEU B  47     3367   5883   2497    873    491    718       N  
ATOM   1208  CA  LEU B  47      41.681 -26.612   5.886  1.00 30.94           C  
ANISOU 1208  CA  LEU B  47     3541   5719   2497    885    443    568       C  
ATOM   1209  C   LEU B  47      41.825 -25.203   6.443  1.00 36.03           C  
ANISOU 1209  C   LEU B  47     4243   6422   3026   1097    372    308       C  
ATOM   1210  O   LEU B  47      41.163 -24.271   5.975  1.00 39.12           O  
ANISOU 1210  O   LEU B  47     4661   6803   3399   1197    338    171       O  
ATOM   1211  CB  LEU B  47      42.208 -26.681   4.454  1.00 28.13           C  
ANISOU 1211  CB  LEU B  47     3329   5015   2343    725    398    518       C  
ATOM   1212  CG  LEU B  47      43.690 -26.344   4.259  1.00 26.75           C  
ANISOU 1212  CG  LEU B  47     3310   4617   2237    693    335    383       C  
ATOM   1213  CD1 LEU B  47      44.562 -27.377   4.968  1.00 31.78           C  
ANISOU 1213  CD1 LEU B  47     3913   5283   2880    628    360    509       C  
ATOM   1214  CD2 LEU B  47      44.023 -26.283   2.787  1.00 27.32           C  
ANISOU 1214  CD2 LEU B  47     3493   4406   2482    554    299    334       C  
ATOM   1215  N   SER B  48      42.682 -25.047   7.446  1.00 42.35           N  
ANISOU 1215  N   SER B  48     5056   7273   3763   1173    332    234       N  
ATOM   1216  CA  SER B  48      43.009 -23.734   7.987  1.00 44.21           C  
ANISOU 1216  CA  SER B  48     5352   7516   3930   1366    228    -32       C  
ATOM   1217  C   SER B  48      44.288 -23.250   7.316  1.00 36.85           C  
ANISOU 1217  C   SER B  48     4615   6302   3085   1318    148   -174       C  
ATOM   1218  O   SER B  48      45.332 -23.903   7.416  1.00 40.40           O  
ANISOU 1218  O   SER B  48     5111   6678   3561   1217    159   -102       O  
ATOM   1219  CB  SER B  48      43.179 -23.792   9.503  1.00 44.97           C  
ANISOU 1219  CB  SER B  48     5335   7850   3903   1491    213    -40       C  
ATOM   1220  OG  SER B  48      44.267 -24.623   9.842  1.00 54.50           O  
ANISOU 1220  OG  SER B  48     6569   9010   5127   1384    232     67       O  
ATOM   1221  N   LEU B  49      44.202 -22.112   6.628  1.00 32.43           N  
ANISOU 1221  N   LEU B  49     4155   5562   2605   1376     50   -360       N  
ATOM   1222  CA  LEU B  49      45.314 -21.681   5.789  1.00 40.34           C  
ANISOU 1222  CA  LEU B  49     5304   6214   3808   1250    -42   -427       C  
ATOM   1223  C   LEU B  49      46.477 -21.151   6.615  1.00 38.30           C  
ANISOU 1223  C   LEU B  49     5103   5915   3536   1337   -150   -587       C  
ATOM   1224  O   LEU B  49      47.626 -21.208   6.163  1.00 46.09           O  
ANISOU 1224  O   LEU B  49     6173   6671   4667   1201   -191   -574       O  
ATOM   1225  CB  LEU B  49      44.842 -20.623   4.792  1.00 30.72           C  
ANISOU 1225  CB  LEU B  49     4154   4795   2726   1258   -132   -525       C  
ATOM   1226  CG  LEU B  49      43.656 -21.041   3.918  1.00 37.15           C  
ANISOU 1226  CG  LEU B  49     4914   5645   3558   1183    -48   -388       C  
ATOM   1227  CD1 LEU B  49      43.330 -19.955   2.907  1.00 40.07           C  
ANISOU 1227  CD1 LEU B  49     5359   5800   4068   1185   -156   -470       C  
ATOM   1228  CD2 LEU B  49      43.947 -22.365   3.216  1.00 32.58           C  
ANISOU 1228  CD2 LEU B  49     4329   5006   3044    959     61   -179       C  
ATOM   1229  N   GLY B  50      46.209 -20.647   7.815  1.00 39.84           N  
ANISOU 1229  N   GLY B  50     5234   6332   3571   1557   -203   -735       N  
ATOM   1230  CA  GLY B  50      47.242 -20.055   8.630  1.00 41.79           C  
ANISOU 1230  CA  GLY B  50     5515   6520   3843   1638   -336   -898       C  
ATOM   1231  C   GLY B  50      48.000 -18.985   7.871  1.00 43.56           C  
ANISOU 1231  C   GLY B  50     5885   6400   4266   1615   -506  -1074       C  
ATOM   1232  O   GLY B  50      47.482 -18.363   6.939  1.00 46.00           O  
ANISOU 1232  O   GLY B  50     6233   6532   4712   1580   -549  -1088       O  
ATOM   1233  N   PRO B  51      49.258 -18.753   8.250  1.00 42.29           N  
ANISOU 1233  N   PRO B  51     5777   6108   4182   1595   -613  -1159       N  
ATOM   1234  CA  PRO B  51      50.074 -17.767   7.539  1.00 43.76           C  
ANISOU 1234  CA  PRO B  51     6063   5932   4634   1515   -783  -1254       C  
ATOM   1235  C   PRO B  51      50.856 -18.328   6.362  1.00 38.40           C  
ANISOU 1235  C   PRO B  51     5429   5032   4130   1237   -704  -1038       C  
ATOM   1236  O   PRO B  51      51.454 -17.538   5.619  1.00 39.84           O  
ANISOU 1236  O   PRO B  51     5669   4935   4535   1141   -822  -1052       O  
ATOM   1237  CB  PRO B  51      51.029 -17.282   8.638  1.00 50.08           C  
ANISOU 1237  CB  PRO B  51     6849   6730   5448   1617   -935  -1416       C  
ATOM   1238  CG  PRO B  51      51.265 -18.524   9.458  1.00 47.95           C  
ANISOU 1238  CG  PRO B  51     6517   6739   4964   1615   -786  -1298       C  
ATOM   1239  CD  PRO B  51      49.964 -19.314   9.417  1.00 46.63           C  
ANISOU 1239  CD  PRO B  51     6266   6832   4619   1633   -596  -1140       C  
ATOM   1240  N   ASN B  52      50.868 -19.651   6.165  1.00 33.81           N  
ANISOU 1240  N   ASN B  52     4810   4573   3463   1112   -519   -837       N  
ATOM   1241  CA  ASN B  52      51.772 -20.279   5.211  1.00 27.69           C  
ANISOU 1241  CA  ASN B  52     4064   3629   2828    885   -451   -677       C  
ATOM   1242  C   ASN B  52      51.089 -20.936   4.021  1.00 21.60           C  
ANISOU 1242  C   ASN B  52     3285   2843   2080    746   -316   -507       C  
ATOM   1243  O   ASN B  52      51.788 -21.459   3.146  1.00 27.23           O  
ANISOU 1243  O   ASN B  52     4012   3442   2891    578   -259   -398       O  
ATOM   1244  CB  ASN B  52      52.644 -21.327   5.913  1.00 26.57           C  
ANISOU 1244  CB  ASN B  52     3888   3588   2620    849   -388   -612       C  
ATOM   1245  CG  ASN B  52      51.831 -22.456   6.515  1.00 27.23           C  
ANISOU 1245  CG  ASN B  52     3893   3937   2516    893   -252   -494       C  
ATOM   1246  ND2 ASN B  52      52.250 -23.684   6.251  1.00 24.76           N  
ANISOU 1246  ND2 ASN B  52     3552   3623   2234    757   -150   -328       N  
ATOM   1247  OD1 ASN B  52      50.847 -22.228   7.217  1.00 32.32           O  
ANISOU 1247  OD1 ASN B  52     4490   4791   3000   1052   -247   -546       O  
ATOM   1248  N   ILE B  53      49.763 -20.933   3.945  1.00 21.11           N  
ANISOU 1248  N   ILE B  53     3189   2905   1927    820   -268   -493       N  
ATOM   1249  CA  ILE B  53      49.062 -21.613   2.862  1.00 21.88           C  
ANISOU 1249  CA  ILE B  53     3271   2999   2044    696   -156   -344       C  
ATOM   1250  C   ILE B  53      48.335 -20.589   2.007  1.00 25.77           C  
ANISOU 1250  C   ILE B  53     3800   3381   2610    711   -226   -381       C  
ATOM   1251  O   ILE B  53      47.703 -19.663   2.529  1.00 23.56           O  
ANISOU 1251  O   ILE B  53     3516   3135   2302    873   -319   -510       O  
ATOM   1252  CB  ILE B  53      48.071 -22.670   3.386  1.00 26.22           C  
ANISOU 1252  CB  ILE B  53     3727   3787   2450    734    -37   -243       C  
ATOM   1253  CG1 ILE B  53      48.788 -23.664   4.299  1.00 28.63           C  
ANISOU 1253  CG1 ILE B  53     3988   4198   2693    720     12   -176       C  
ATOM   1254  CG2 ILE B  53      47.421 -23.402   2.224  1.00 22.48           C  
ANISOU 1254  CG2 ILE B  53     3236   3276   2031    596     48   -107       C  
ATOM   1255  CD1 ILE B  53      47.883 -24.767   4.811  1.00 22.85           C  
ANISOU 1255  CD1 ILE B  53     3143   3689   1850    728    118    -20       C  
ATOM   1256  N   GLU B  54      48.417 -20.761   0.689  1.00 21.56           N  
ANISOU 1256  N   GLU B  54     3295   2730   2167    555   -190   -273       N  
ATOM   1257  CA  GLU B  54      47.625 -19.941  -0.213  1.00 30.20           C  
ANISOU 1257  CA  GLU B  54     4413   3743   3318    555   -246   -264       C  
ATOM   1258  C   GLU B  54      47.029 -20.817  -1.301  1.00 25.40           C  
ANISOU 1258  C   GLU B  54     3783   3183   2685    436   -136   -132       C  
ATOM   1259  O   GLU B  54      47.673 -21.750  -1.791  1.00 24.26           O  
ANISOU 1259  O   GLU B  54     3635   3035   2549    311    -56    -58       O  
ATOM   1260  CB  GLU B  54      48.448 -18.798  -0.823  1.00 28.42           C  
ANISOU 1260  CB  GLU B  54     4249   3293   3255    496   -379   -272       C  
ATOM   1261  CG  GLU B  54      49.520 -19.210  -1.790  1.00 42.46           C  
ANISOU 1261  CG  GLU B  54     6042   4994   5099    308   -325   -148       C  
ATOM   1262  CD  GLU B  54      50.099 -18.025  -2.548  1.00 50.80           C  
ANISOU 1262  CD  GLU B  54     7129   5857   6315    232   -452    -92       C  
ATOM   1263  OE1 GLU B  54      51.303 -18.058  -2.880  1.00 55.10           O  
ANISOU 1263  OE1 GLU B  54     7667   6335   6933    113   -449    -24       O  
ATOM   1264  OE2 GLU B  54      49.348 -17.060  -2.810  1.00 51.64           O1-
ANISOU 1264  OE2 GLU B  54     7254   5881   6487    288   -562   -102       O1-
ATOM   1265  N   ILE B  55      45.778 -20.531  -1.638  1.00 22.02           N  
ANISOU 1265  N   ILE B  55     3333   2805   2229    492   -146   -125       N  
ATOM   1266  CA  ILE B  55      45.087 -21.165  -2.749  1.00 20.75           C  
ANISOU 1266  CA  ILE B  55     3151   2676   2056    393    -80    -22       C  
ATOM   1267  C   ILE B  55      45.066 -20.174  -3.899  1.00 26.40           C  
ANISOU 1267  C   ILE B  55     3922   3259   2850    343   -167     13       C  
ATOM   1268  O   ILE B  55      44.691 -19.008  -3.717  1.00 26.63           O  
ANISOU 1268  O   ILE B  55     3970   3214   2934    440   -282    -42       O  
ATOM   1269  CB  ILE B  55      43.666 -21.595  -2.351  1.00 28.72           C  
ANISOU 1269  CB  ILE B  55     4076   3851   2985    478    -35    -11       C  
ATOM   1270  CG1 ILE B  55      43.734 -22.530  -1.140  1.00 36.34           C  
ANISOU 1270  CG1 ILE B  55     4968   4968   3871    520     45      1       C  
ATOM   1271  CG2 ILE B  55      42.952 -22.253  -3.536  1.00 20.59           C  
ANISOU 1271  CG2 ILE B  55     3023   2836   1964    372      7     81       C  
ATOM   1272  CD1 ILE B  55      42.418 -22.738  -0.449  1.00 34.20           C  
ANISOU 1272  CD1 ILE B  55     4585   4901   3507    631     84     22       C  
ATOM   1273  N   ILE B  56      45.489 -20.628  -5.074  1.00 26.64           N  
ANISOU 1273  N   ILE B  56     3967   3268   2886    201   -122    104       N  
ATOM   1274  CA  ILE B  56      45.562 -19.786  -6.260  1.00 28.56           C  
ANISOU 1274  CA  ILE B  56     4246   3426   3178    133   -191    185       C  
ATOM   1275  C   ILE B  56      44.633 -20.364  -7.309  1.00 30.48           C  
ANISOU 1275  C   ILE B  56     4465   3766   3351     87   -147    244       C  
ATOM   1276  O   ILE B  56      44.709 -21.557  -7.622  1.00 28.54           O  
ANISOU 1276  O   ILE B  56     4189   3606   3046     26    -56    243       O  
ATOM   1277  CB  ILE B  56      46.997 -19.684  -6.807  1.00 35.66           C  
ANISOU 1277  CB  ILE B  56     5168   4262   4119     11   -183    253       C  
ATOM   1278  CG1 ILE B  56      47.954 -19.221  -5.707  1.00 43.79           C  
ANISOU 1278  CG1 ILE B  56     6213   5192   5233     52   -238    184       C  
ATOM   1279  CG2 ILE B  56      47.036 -18.755  -8.005  1.00 42.91           C  
ANISOU 1279  CG2 ILE B  56     6101   5123   5078    -64   -257    385       C  
ATOM   1280  CD1 ILE B  56      49.344 -18.868  -6.215  1.00 53.08           C  
ANISOU 1280  CD1 ILE B  56     7392   6290   6486    -69   -256    270       C  
ATOM   1281  N   HIS B  57      43.768 -19.514  -7.853  1.00 22.57           N  
ANISOU 1281  N   HIS B  57     3471   2735   2369    123   -232    284       N  
ATOM   1282  CA  HIS B  57      42.815 -19.876  -8.890  1.00 17.77           C  
ANISOU 1282  CA  HIS B  57     2839   2215   1699     90   -220    338       C  
ATOM   1283  C   HIS B  57      43.178 -19.083 -10.135  1.00 22.39           C  
ANISOU 1283  C   HIS B  57     3457   2758   2291      7   -286    464       C  
ATOM   1284  O   HIS B  57      43.271 -17.852 -10.077  1.00 19.56           O  
ANISOU 1284  O   HIS B  57     3126   2272   2033     34   -401    516       O  
ATOM   1285  CB  HIS B  57      41.391 -19.577  -8.408  1.00 18.22           C  
ANISOU 1285  CB  HIS B  57     2855   2303   1765    214   -266    292       C  
ATOM   1286  CG  HIS B  57      40.311 -19.913  -9.386  1.00 27.41           C  
ANISOU 1286  CG  HIS B  57     3984   3551   2880    189   -273    340       C  
ATOM   1287  CD2 HIS B  57      39.109 -19.329  -9.608  1.00 21.71           C  
ANISOU 1287  CD2 HIS B  57     3233   2842   2176    266   -349    352       C  
ATOM   1288  ND1 HIS B  57      40.385 -20.983 -10.252  1.00 29.54           N  
ANISOU 1288  ND1 HIS B  57     4236   3908   3079     88   -210    362       N  
ATOM   1289  CE1 HIS B  57      39.283 -21.032 -10.981  1.00 25.51           C  
ANISOU 1289  CE1 HIS B  57     3692   3459   2541     96   -252    389       C  
ATOM   1290  NE2 HIS B  57      38.496 -20.034 -10.616  1.00 25.11           N  
ANISOU 1290  NE2 HIS B  57     3632   3366   2543    198   -332    395       N  
ATOM   1291  N   GLU B  58      43.404 -19.792 -11.252  1.00 19.79           N  
ANISOU 1291  N   GLU B  58     3116   2545   1860    -89   -224    517       N  
ATOM   1292  CA  GLU B  58      43.746 -19.194 -12.540  1.00 21.62           C  
ANISOU 1292  CA  GLU B  58     3355   2814   2045   -172   -264    665       C  
ATOM   1293  C   GLU B  58      42.861 -19.793 -13.622  1.00 20.67           C  
ANISOU 1293  C   GLU B  58     3208   2847   1797   -185   -253    672       C  
ATOM   1294  O   GLU B  58      42.587 -20.996 -13.612  1.00 29.15           O  
ANISOU 1294  O   GLU B  58     4255   4009   2813   -179   -185    558       O  
ATOM   1295  CB  GLU B  58      45.221 -19.427 -12.899  1.00 21.62           C  
ANISOU 1295  CB  GLU B  58     3347   2861   2006   -270   -193    717       C  
ATOM   1296  CG  GLU B  58      46.182 -19.074 -11.785  1.00 25.65           C  
ANISOU 1296  CG  GLU B  58     3873   3230   2641   -264   -200    684       C  
ATOM   1297  CD  GLU B  58      47.637 -19.322 -12.137  1.00 32.66           C  
ANISOU 1297  CD  GLU B  58     4733   4176   3500   -361   -128    740       C  
ATOM   1298  OE1 GLU B  58      47.929 -19.775 -13.264  1.00 35.25           O  
ANISOU 1298  OE1 GLU B  58     5022   4679   3691   -423    -63    799       O  
ATOM   1299  OE2 GLU B  58      48.496 -19.042 -11.281  1.00 39.56           O1-
ANISOU 1299  OE2 GLU B  58     5613   4936   4482   -365   -143    719       O1-
ATOM   1300  N   GLY B  59      42.424 -18.960 -14.559  1.00 23.17           N  
ANISOU 1300  N   GLY B  59     3529   3188   2086   -203   -339    809       N  
ATOM   1301  CA  GLY B  59      41.484 -19.459 -15.547  1.00 23.74           C  
ANISOU 1301  CA  GLY B  59     3575   3410   2036   -200   -351    804       C  
ATOM   1302  C   GLY B  59      40.214 -19.908 -14.841  1.00 25.80           C  
ANISOU 1302  C   GLY B  59     3813   3633   2357   -111   -369    679       C  
ATOM   1303  O   GLY B  59      39.961 -19.585 -13.678  1.00 32.29           O  
ANISOU 1303  O   GLY B  59     4637   4335   3296    -39   -381    626       O  
ATOM   1304  N   LEU B  60      39.406 -20.682 -15.555  1.00 23.64           N  
ANISOU 1304  N   LEU B  60     3503   3484   1997   -113   -373    629       N  
ATOM   1305  CA  LEU B  60      38.201 -21.208 -14.925  1.00 33.84           C  
ANISOU 1305  CA  LEU B  60     4743   4757   3356    -48   -387    536       C  
ATOM   1306  C   LEU B  60      38.443 -22.497 -14.153  1.00 28.85           C  
ANISOU 1306  C   LEU B  60     4075   4126   2760    -60   -297    414       C  
ATOM   1307  O   LEU B  60      37.778 -22.730 -13.139  1.00 31.34           O  
ANISOU 1307  O   LEU B  60     4342   4404   3162     -7   -284    378       O  
ATOM   1308  CB  LEU B  60      37.102 -21.437 -15.969  1.00 39.25           C  
ANISOU 1308  CB  LEU B  60     5389   5552   3972    -45   -462    544       C  
ATOM   1309  CG  LEU B  60      35.976 -20.401 -15.935  1.00 51.31           C  
ANISOU 1309  CG  LEU B  60     6901   7032   5562     29   -566    619       C  
ATOM   1310  CD1 LEU B  60      36.433 -19.090 -16.574  1.00 58.16           C  
ANISOU 1310  CD1 LEU B  60     7826   7860   6412     15   -643    780       C  
ATOM   1311  CD2 LEU B  60      34.741 -20.930 -16.625  1.00 52.16           C  
ANISOU 1311  CD2 LEU B  60     6944   7242   5634     41   -631    588       C  
ATOM   1312  N   ASP B  61      39.390 -23.334 -14.584  1.00 29.73           N  
ANISOU 1312  N   ASP B  61     4196   4289   2811   -123   -241    358       N  
ATOM   1313  CA  ASP B  61      39.501 -24.681 -14.035  1.00 27.50           C  
ANISOU 1313  CA  ASP B  61     3867   3992   2588   -140   -191    246       C  
ATOM   1314  C   ASP B  61      40.720 -24.923 -13.155  1.00 26.69           C  
ANISOU 1314  C   ASP B  61     3789   3822   2530   -154   -109    223       C  
ATOM   1315  O   ASP B  61      40.775 -25.961 -12.491  1.00 26.04           O  
ANISOU 1315  O   ASP B  61     3664   3704   2526   -163    -78    160       O  
ATOM   1316  CB  ASP B  61      39.524 -25.716 -15.167  1.00 34.47           C  
ANISOU 1316  CB  ASP B  61     4724   4974   3400   -177   -220    145       C  
ATOM   1317  CG  ASP B  61      38.205 -25.798 -15.920  1.00 44.90           C  
ANISOU 1317  CG  ASP B  61     6002   6359   4701   -162   -317    136       C  
ATOM   1318  OD1 ASP B  61      37.336 -24.921 -15.728  1.00 42.73           O  
ANISOU 1318  OD1 ASP B  61     5723   6067   4448   -126   -357    230       O  
ATOM   1319  OD2 ASP B  61      38.039 -26.758 -16.705  1.00 51.21           O1-
ANISOU 1319  OD2 ASP B  61     6765   7222   5471   -178   -368     19       O1-
ATOM   1320  N   TYR B  62      41.696 -24.022 -13.130  1.00 22.07           N  
ANISOU 1320  N   TYR B  62     3260   3211   1914   -164    -86    285       N  
ATOM   1321  CA  TYR B  62      42.962 -24.314 -12.471  1.00 17.37           C  
ANISOU 1321  CA  TYR B  62     2681   2568   1352   -185    -16    254       C  
ATOM   1322  C   TYR B  62      42.978 -23.798 -11.038  1.00 24.37           C  
ANISOU 1322  C   TYR B  62     3579   3348   2332   -132     -9    271       C  
ATOM   1323  O   TYR B  62      42.598 -22.652 -10.773  1.00 23.78           O  
ANISOU 1323  O   TYR B  62     3529   3223   2282    -83    -64    325       O  
ATOM   1324  CB  TYR B  62      44.125 -23.714 -13.255  1.00 17.90           C  
ANISOU 1324  CB  TYR B  62     2778   2684   1339   -236      3    318       C  
ATOM   1325  CG  TYR B  62      45.481 -23.910 -12.611  1.00 29.45           C  
ANISOU 1325  CG  TYR B  62     4246   4099   2844   -259     68    294       C  
ATOM   1326  CD1 TYR B  62      46.240 -25.041 -12.882  1.00 39.74           C  
ANISOU 1326  CD1 TYR B  62     5516   5466   4116   -280    127    193       C  
ATOM   1327  CD2 TYR B  62      45.999 -22.969 -11.723  1.00 24.63           C  
ANISOU 1327  CD2 TYR B  62     3669   3373   2319   -250     53    355       C  
ATOM   1328  CE1 TYR B  62      47.483 -25.224 -12.304  1.00 36.25           C  
ANISOU 1328  CE1 TYR B  62     5069   4984   3719   -296    180    174       C  
ATOM   1329  CE2 TYR B  62      47.244 -23.145 -11.142  1.00 32.79           C  
ANISOU 1329  CE2 TYR B  62     4700   4365   3395   -273    100    333       C  
ATOM   1330  CZ  TYR B  62      47.980 -24.275 -11.446  1.00 32.68           C  
ANISOU 1330  CZ  TYR B  62     4650   4427   3342   -299    170    252       C  
ATOM   1331  OH  TYR B  62      49.214 -24.467 -10.880  1.00 32.45           O  
ANISOU 1331  OH  TYR B  62     4608   4360   3360   -317    213    230       O  
ATOM   1332  N   TYR B  63      43.452 -24.643 -10.122  1.00 16.07           N  
ANISOU 1332  N   TYR B  63     2504   2268   1332   -130     45    216       N  
ATOM   1333  CA  TYR B  63      43.629 -24.290  -8.724  1.00 15.64           C  
ANISOU 1333  CA  TYR B  63     2453   2156   1333    -70     58    216       C  
ATOM   1334  C   TYR B  63      44.925 -24.897  -8.226  1.00 27.60           C  
ANISOU 1334  C   TYR B  63     3973   3638   2874   -104    111    182       C  
ATOM   1335  O   TYR B  63      45.227 -26.055  -8.534  1.00 30.69           O  
ANISOU 1335  O   TYR B  63     4334   4049   3279   -150    143    141       O  
ATOM   1336  CB  TYR B  63      42.485 -24.803  -7.851  1.00 15.66           C  
ANISOU 1336  CB  TYR B  63     2385   2202   1364    -13     64    216       C  
ATOM   1337  CG  TYR B  63      41.135 -24.186  -8.121  1.00 20.33           C  
ANISOU 1337  CG  TYR B  63     2949   2835   1940     42     12    243       C  
ATOM   1338  CD1 TYR B  63      40.325 -24.666  -9.143  1.00 19.33           C  
ANISOU 1338  CD1 TYR B  63     2789   2751   1803     -2    -18    253       C  
ATOM   1339  CD2 TYR B  63      40.652 -23.147  -7.323  1.00 21.66           C  
ANISOU 1339  CD2 TYR B  63     3117   3005   2110    154    -21    239       C  
ATOM   1340  CE1 TYR B  63      39.074 -24.120  -9.380  1.00 23.05           C  
ANISOU 1340  CE1 TYR B  63     3225   3264   2269     51    -72    281       C  
ATOM   1341  CE2 TYR B  63      39.404 -22.591  -7.552  1.00 19.56           C  
ANISOU 1341  CE2 TYR B  63     2812   2780   1839    221    -75    253       C  
ATOM   1342  CZ  TYR B  63      38.622 -23.080  -8.580  1.00 24.90           C  
ANISOU 1342  CZ  TYR B  63     3454   3498   2509    162    -95    286       C  
ATOM   1343  OH  TYR B  63      37.383 -22.534  -8.812  1.00 24.95           O  
ANISOU 1343  OH  TYR B  63     3414   3547   2518    229   -154    304       O  
ATOM   1344  N   ALA B  64      45.680 -24.124  -7.446  1.00 21.92           N  
ANISOU 1344  N   ALA B  64     3289   2859   2179    -73    103    185       N  
ATOM   1345  CA  ALA B  64      46.907 -24.623  -6.840  1.00 18.65           C  
ANISOU 1345  CA  ALA B  64     2875   2414   1797    -95    144    155       C  
ATOM   1346  C   ALA B  64      46.870 -24.384  -5.338  1.00 23.52           C  
ANISOU 1346  C   ALA B  64     3486   3017   2434     -9    133    135       C  
ATOM   1347  O   ALA B  64      46.426 -23.332  -4.873  1.00 27.74           O  
ANISOU 1347  O   ALA B  64     4041   3533   2965     70     75    123       O  
ATOM   1348  CB  ALA B  64      48.157 -23.972  -7.452  1.00 16.24           C  
ANISOU 1348  CB  ALA B  64     2604   2071   1497   -155    138    178       C  
ATOM   1349  N   LEU B  65      47.328 -25.370  -4.585  1.00 26.63           N  
ANISOU 1349  N   LEU B  65     3844   3428   2846    -13    176    125       N  
ATOM   1350  CA  LEU B  65      47.428 -25.277  -3.133  1.00 24.92           C  
ANISOU 1350  CA  LEU B  65     3611   3243   2617     71    172    114       C  
ATOM   1351  C   LEU B  65      48.909 -25.215  -2.792  1.00 26.06           C  
ANISOU 1351  C   LEU B  65     3784   3320   2798     46    167     81       C  
ATOM   1352  O   LEU B  65      49.625 -26.214  -2.936  1.00 23.91           O  
ANISOU 1352  O   LEU B  65     3488   3033   2565    -16    206     89       O  
ATOM   1353  CB  LEU B  65      46.744 -26.465  -2.458  1.00 20.60           C  
ANISOU 1353  CB  LEU B  65     2979   2785   2063     79    215    173       C  
ATOM   1354  CG  LEU B  65      46.861 -26.594  -0.933  1.00 21.84           C  
ANISOU 1354  CG  LEU B  65     3093   3034   2172    164    226    195       C  
ATOM   1355  CD1 LEU B  65      46.080 -25.502  -0.244  1.00 24.15           C  
ANISOU 1355  CD1 LEU B  65     3380   3425   2371    300    196    151       C  
ATOM   1356  CD2 LEU B  65      46.368 -27.962  -0.486  1.00 17.31           C  
ANISOU 1356  CD2 LEU B  65     2419   2533   1626    125    266    314       C  
ATOM   1357  N   HIS B  66      49.369 -24.045  -2.352  1.00 22.46           N  
ANISOU 1357  N   HIS B  66     3371   2811   2351     98    101     36       N  
ATOM   1358  CA  HIS B  66      50.774 -23.825  -2.027  1.00 22.24           C  
ANISOU 1358  CA  HIS B  66     3362   2710   2377     72     75      6       C  
ATOM   1359  C   HIS B  66      50.944 -23.824  -0.513  1.00 26.73           C  
ANISOU 1359  C   HIS B  66     3917   3329   2910    177     45    -46       C  
ATOM   1360  O   HIS B  66      50.409 -22.950   0.176  1.00 25.25           O  
ANISOU 1360  O   HIS B  66     3742   3167   2685    292    -23   -112       O  
ATOM   1361  CB  HIS B  66      51.282 -22.511  -2.623  1.00 28.04           C  
ANISOU 1361  CB  HIS B  66     4141   3332   3182     39     -7      6       C  
ATOM   1362  CG  HIS B  66      51.585 -22.584  -4.089  1.00 46.70           C  
ANISOU 1362  CG  HIS B  66     6499   5684   5560    -80     33     84       C  
ATOM   1363  CD2 HIS B  66      52.623 -23.139  -4.760  1.00 51.47           C  
ANISOU 1363  CD2 HIS B  66     7073   6306   6177   -173     93    115       C  
ATOM   1364  ND1 HIS B  66      50.759 -22.036  -5.049  1.00 51.51           N  
ANISOU 1364  ND1 HIS B  66     7124   6297   6149   -100     13    138       N  
ATOM   1365  CE1 HIS B  66      51.276 -22.248  -6.247  1.00 52.48           C  
ANISOU 1365  CE1 HIS B  66     7227   6458   6254   -201     60    206       C  
ATOM   1366  NE2 HIS B  66      52.408 -22.915  -6.100  1.00 51.52           N  
ANISOU 1366  NE2 HIS B  66     7074   6354   6149   -241    113    185       N  
ATOM   1367  N   ILE B  67      51.678 -24.804   0.001  1.00 20.26           N  
ANISOU 1367  N   ILE B  67     3065   2537   2096    152     87    -26       N  
ATOM   1368  CA  ILE B  67      52.018 -24.872   1.418  1.00 21.93           C  
ANISOU 1368  CA  ILE B  67     3257   2818   2256    246     56    -60       C  
ATOM   1369  C   ILE B  67      53.508 -24.577   1.530  1.00 24.06           C  
ANISOU 1369  C   ILE B  67     3548   2983   2609    207      4   -107       C  
ATOM   1370  O   ILE B  67      54.346 -25.338   1.027  1.00 24.95           O  
ANISOU 1370  O   ILE B  67     3641   3051   2789    113     50    -68       O  
ATOM   1371  CB  ILE B  67      51.661 -26.232   2.028  1.00 22.18           C  
ANISOU 1371  CB  ILE B  67     3218   2967   2241    247    125     35       C  
ATOM   1372  CG1 ILE B  67      50.237 -26.625   1.626  1.00 28.80           C  
ANISOU 1372  CG1 ILE B  67     4016   3884   3044    242    175    109       C  
ATOM   1373  CG2 ILE B  67      51.792 -26.184   3.550  1.00 27.02           C  
ANISOU 1373  CG2 ILE B  67     3799   3717   2751    366     94     22       C  
ATOM   1374  CD1 ILE B  67      49.942 -28.108   1.758  1.00 30.65           C  
ANISOU 1374  CD1 ILE B  67     4169   4162   3314    181    227    239       C  
ATOM   1375  N   ARG B  68      53.833 -23.456   2.161  1.00 21.17           N  
ANISOU 1375  N   ARG B  68     3214   2577   2252    286   -104   -203       N  
ATOM   1376  CA  ARG B  68      55.204 -23.026   2.380  1.00 22.95           C  
ANISOU 1376  CA  ARG B  68     3447   2696   2575    254   -182   -251       C  
ATOM   1377  C   ARG B  68      55.613 -23.294   3.822  1.00 25.60           C  
ANISOU 1377  C   ARG B  68     3763   3127   2838    361   -227   -313       C  
ATOM   1378  O   ARG B  68      54.769 -23.457   4.710  1.00 23.42           O  
ANISOU 1378  O   ARG B  68     3468   3010   2420    483   -219   -334       O  
ATOM   1379  CB  ARG B  68      55.359 -21.536   2.047  1.00 23.85           C  
ANISOU 1379  CB  ARG B  68     3603   2664   2797    257   -313   -315       C  
ATOM   1380  CG  ARG B  68      54.858 -21.227   0.633  1.00 38.48           C  
ANISOU 1380  CG  ARG B  68     5470   4454   4698    157   -273   -223       C  
ATOM   1381  CD  ARG B  68      55.386 -19.921   0.048  1.00 51.20           C  
ANISOU 1381  CD  ARG B  68     7096   5888   6468     94   -399   -208       C  
ATOM   1382  NE  ARG B  68      55.197 -19.904  -1.403  1.00 60.79           N  
ANISOU 1382  NE  ARG B  68     8302   7091   7703    -31   -331    -70       N  
ATOM   1383  CZ  ARG B  68      54.082 -19.505  -2.014  1.00 59.42           C  
ANISOU 1383  CZ  ARG B  68     8155   6922   7501    -13   -335    -37       C  
ATOM   1384  NH1 ARG B  68      53.047 -19.078  -1.304  1.00 53.92           N1+
ANISOU 1384  NH1 ARG B  68     7488   6236   6764    128   -401   -138       N1+
ATOM   1385  NH2 ARG B  68      53.999 -19.530  -3.338  1.00 60.18           N  
ANISOU 1385  NH2 ARG B  68     8236   7035   7594   -125   -276     93       N  
ATOM   1386  N   ASP B  69      56.926 -23.326   4.044  1.00 23.30           N  
ANISOU 1386  N   ASP B  69     3459   2760   2633    316   -276   -333       N  
ATOM   1387  CA  ASP B  69      57.503 -23.500   5.373  1.00 20.41           C  
ANISOU 1387  CA  ASP B  69     3074   2475   2206    413   -342   -396       C  
ATOM   1388  C   ASP B  69      56.896 -24.713   6.076  1.00 26.30           C  
ANISOU 1388  C   ASP B  69     3775   3415   2803    465   -248   -304       C  
ATOM   1389  O   ASP B  69      56.366 -24.626   7.186  1.00 26.73           O  
ANISOU 1389  O   ASP B  69     3811   3643   2701    605   -278   -342       O  
ATOM   1390  CB  ASP B  69      57.319 -22.230   6.201  1.00 27.67           C  
ANISOU 1390  CB  ASP B  69     4026   3394   3095    558   -501   -566       C  
ATOM   1391  CG  ASP B  69      58.350 -21.172   5.869  1.00 40.04           C  
ANISOU 1391  CG  ASP B  69     5612   4743   4860    497   -646   -642       C  
ATOM   1392  OD1 ASP B  69      59.547 -21.431   6.119  1.00 35.03           O  
ANISOU 1392  OD1 ASP B  69     4947   4061   4302    443   -681   -636       O  
ATOM   1393  OD2 ASP B  69      57.971 -20.099   5.342  1.00 43.75           O1-
ANISOU 1393  OD2 ASP B  69     6115   5083   5426    494   -732   -688       O1-
ATOM   1394  N   THR B  70      56.981 -25.855   5.396  1.00 17.23           N  
ANISOU 1394  N   THR B  70     2595   2242   1711    353   -142   -177       N  
ATOM   1395  CA  THR B  70      56.310 -27.061   5.855  1.00 20.25           C  
ANISOU 1395  CA  THR B  70     2922   2763   2011    368    -65    -47       C  
ATOM   1396  C   THR B  70      56.942 -27.585   7.138  1.00 26.15           C  
ANISOU 1396  C   THR B  70     3625   3620   2692    435   -108    -12       C  
ATOM   1397  O   THR B  70      58.149 -27.450   7.370  1.00 20.42           O  
ANISOU 1397  O   THR B  70     2905   2817   2037    423   -174    -71       O  
ATOM   1398  CB  THR B  70      56.356 -28.152   4.782  1.00 20.29           C  
ANISOU 1398  CB  THR B  70     2901   2671   2138    238     17     49       C  
ATOM   1399  CG2 THR B  70      55.506 -27.757   3.568  1.00 17.91           C  
ANISOU 1399  CG2 THR B  70     2631   2315   1857    186     64     34       C  
ATOM   1400  OG1 THR B  70      57.711 -28.363   4.369  1.00 21.58           O  
ANISOU 1400  OG1 THR B  70     3060   2710   2430    169     -1     13       O  
ATOM   1401  N   LEU B  71      56.097 -28.182   7.978  1.00 22.75           N  
ANISOU 1401  N   LEU B  71     3136   3389   2120    502    -72    104       N  
ATOM   1402  CA  LEU B  71      56.440 -28.858   9.214  1.00 23.21           C  
ANISOU 1402  CA  LEU B  71     3131   3608   2082    564    -97    202       C  
ATOM   1403  C   LEU B  71      55.989 -30.307   9.138  1.00 24.64           C  
ANISOU 1403  C   LEU B  71     3230   3812   2320    478    -28    438       C  
ATOM   1404  O   LEU B  71      55.040 -30.617   8.414  1.00 23.27           O  
ANISOU 1404  O   LEU B  71     3040   3608   2191    416     37    507       O  
ATOM   1405  CB  LEU B  71      55.773 -28.188  10.419  1.00 27.23           C  
ANISOU 1405  CB  LEU B  71     3614   4394   2338    742   -129    153       C  
ATOM   1406  CG  LEU B  71      56.168 -26.746  10.741  1.00 22.64           C  
ANISOU 1406  CG  LEU B  71     3101   3797   1704    865   -244   -106       C  
ATOM   1407  CD1 LEU B  71      55.328 -26.271  11.896  1.00 23.27           C  
ANISOU 1407  CD1 LEU B  71     3134   4194   1512   1066   -265   -164       C  
ATOM   1408  CD2 LEU B  71      57.642 -26.676  11.084  1.00 27.91           C  
ANISOU 1408  CD2 LEU B  71     3790   4355   2460    850   -348   -182       C  
ATOM   1409  N   PRO B  72      56.644 -31.216   9.867  1.00 26.92           N  
ANISOU 1409  N   PRO B  72     3460   4139   2631    469    -61    570       N  
ATOM   1410  CA  PRO B  72      56.207 -32.618   9.831  1.00 35.73           C  
ANISOU 1410  CA  PRO B  72     4485   5243   3847    380    -29    815       C  
ATOM   1411  C   PRO B  72      54.740 -32.806  10.181  1.00 33.84           C  
ANISOU 1411  C   PRO B  72     4168   5215   3476    402     36    983       C  
ATOM   1412  O   PRO B  72      54.103 -33.712   9.635  1.00 31.99           O  
ANISOU 1412  O   PRO B  72     3875   4895   3384    298     64   1139       O  
ATOM   1413  CB  PRO B  72      57.135 -33.295  10.849  1.00 39.10           C  
ANISOU 1413  CB  PRO B  72     4857   5726   4271    404    -99    932       C  
ATOM   1414  CG  PRO B  72      58.372 -32.447  10.831  1.00 38.43           C  
ANISOU 1414  CG  PRO B  72     4853   5550   4199    448   -162    702       C  
ATOM   1415  CD  PRO B  72      57.879 -31.043  10.656  1.00 32.55           C  
ANISOU 1415  CD  PRO B  72     4181   4866   3320    525   -150    503       C  
ATOM   1416  N   GLU B  73      54.175 -31.962  11.048  1.00 29.87           N  
ANISOU 1416  N   GLU B  73     3650   4988   2712    543     51    943       N  
ATOM   1417  CA  GLU B  73      52.754 -32.058  11.375  1.00 40.77           C  
ANISOU 1417  CA  GLU B  73     4933   6611   3946    579    124   1096       C  
ATOM   1418  C   GLU B  73      51.850 -31.786  10.175  1.00 37.22           C  
ANISOU 1418  C   GLU B  73     4519   6024   3601    513    177   1029       C  
ATOM   1419  O   GLU B  73      50.670 -32.146  10.219  1.00 40.14           O  
ANISOU 1419  O   GLU B  73     4790   6535   3926    496    237   1195       O  
ATOM   1420  CB  GLU B  73      52.411 -31.096  12.517  1.00 55.55           C  
ANISOU 1420  CB  GLU B  73     6777   8819   5509    778    123    997       C  
ATOM   1421  CG  GLU B  73      52.930 -29.676  12.312  1.00 66.56           C  
ANISOU 1421  CG  GLU B  73     8305  10134   6853    890     57    656       C  
ATOM   1422  CD  GLU B  73      52.793 -28.807  13.556  1.00 79.39           C  
ANISOU 1422  CD  GLU B  73     9889  12016   8258   1085     16    499       C  
ATOM   1423  OE1 GLU B  73      53.500 -29.072  14.554  1.00 83.59           O  
ANISOU 1423  OE1 GLU B  73    10380  12662   8719   1133    -30    528       O  
ATOM   1424  OE2 GLU B  73      51.982 -27.855  13.532  1.00 83.18           O1-
ANISOU 1424  OE2 GLU B  73    10367  12557   8682   1186     23    332       O1-
ATOM   1425  N   ASP B  74      52.371 -31.173   9.104  1.00 30.84           N  
ANISOU 1425  N   ASP B  74     3833   4958   2925    471    154    809       N  
ATOM   1426  CA  ASP B  74      51.585 -30.981   7.888  1.00 26.47           C  
ANISOU 1426  CA  ASP B  74     3312   4273   2471    400    195    758       C  
ATOM   1427  C   ASP B  74      51.315 -32.279   7.148  1.00 30.78           C  
ANISOU 1427  C   ASP B  74     3803   4665   3227    249    207    920       C  
ATOM   1428  O   ASP B  74      50.487 -32.280   6.231  1.00 26.82           O  
ANISOU 1428  O   ASP B  74     3303   4093   2793    194    235    908       O  
ATOM   1429  CB  ASP B  74      52.283 -30.018   6.933  1.00 27.58           C  
ANISOU 1429  CB  ASP B  74     3583   4204   2692    387    162    519       C  
ATOM   1430  CG  ASP B  74      52.388 -28.627   7.498  1.00 37.74           C  
ANISOU 1430  CG  ASP B  74     4926   5588   3828    531    116    337       C  
ATOM   1431  OD1 ASP B  74      51.482 -28.223   8.254  1.00 37.87           O  
ANISOU 1431  OD1 ASP B  74     4891   5836   3662    655    131    345       O  
ATOM   1432  OD2 ASP B  74      53.381 -27.930   7.198  1.00 32.16           O1-
ANISOU 1432  OD2 ASP B  74     4300   4727   3192    526     53    183       O1-
ATOM   1433  N   THR B  75      52.011 -33.356   7.502  1.00 28.71           N  
ANISOU 1433  N   THR B  75     3490   4333   3085    188    167   1055       N  
ATOM   1434  CA  THR B  75      51.752 -34.659   6.914  1.00 25.60           C  
ANISOU 1434  CA  THR B  75     3028   3774   2925     58    141   1204       C  
ATOM   1435  C   THR B  75      50.288 -35.047   7.108  1.00 26.69           C  
ANISOU 1435  C   THR B  75     3048   4057   3035     27    177   1414       C  
ATOM   1436  O   THR B  75      49.710 -34.853   8.183  1.00 27.12           O  
ANISOU 1436  O   THR B  75     3015   4394   2894    100    217   1566       O  
ATOM   1437  CB  THR B  75      52.680 -35.700   7.547  1.00 24.98           C  
ANISOU 1437  CB  THR B  75     2895   3626   2971     23     71   1344       C  
ATOM   1438  CG2 THR B  75      52.435 -37.102   6.983  1.00 24.99           C  
ANISOU 1438  CG2 THR B  75     2816   3416   3263   -104      4   1490       C  
ATOM   1439  OG1 THR B  75      54.043 -35.322   7.311  1.00 29.89           O  
ANISOU 1439  OG1 THR B  75     3612   4118   3628     51     40   1141       O  
ATOM   1440  N   GLY B  76      49.682 -35.566   6.052  1.00 22.97           N  
ANISOU 1440  N   GLY B  76     2563   3416   2749    -72    161   1415       N  
ATOM   1441  CA  GLY B  76      48.305 -36.001   6.132  1.00 30.76           C  
ANISOU 1441  CA  GLY B  76     3422   4510   3755   -122    179   1621       C  
ATOM   1442  C   GLY B  76      47.693 -36.134   4.752  1.00 32.68           C  
ANISOU 1442  C   GLY B  76     3695   4562   4159   -200    156   1508       C  
ATOM   1443  O   GLY B  76      48.369 -36.010   3.732  1.00 25.47           O  
ANISOU 1443  O   GLY B  76     2893   3446   3338   -216    128   1285       O  
ATOM   1444  N   TYR B  77      46.389 -36.402   4.756  1.00 34.73           N  
ANISOU 1444  N   TYR B  77     3838   4918   4439   -245    169   1675       N  
ATOM   1445  CA  TYR B  77      45.605 -36.530   3.539  1.00 27.91           C  
ANISOU 1445  CA  TYR B  77     2980   3912   3712   -314    138   1590       C  
ATOM   1446  C   TYR B  77      44.856 -35.226   3.313  1.00 29.83           C  
ANISOU 1446  C   TYR B  77     3273   4328   3731   -220    224   1463       C  
ATOM   1447  O   TYR B  77      44.089 -34.791   4.180  1.00 32.72           O  
ANISOU 1447  O   TYR B  77     3549   4962   3919   -151    292   1592       O  
ATOM   1448  CB  TYR B  77      44.627 -37.702   3.637  1.00 30.14           C  
ANISOU 1448  CB  TYR B  77     3085   4160   4209   -437     68   1864       C  
ATOM   1449  CG  TYR B  77      45.299 -39.052   3.614  1.00 35.68           C  
ANISOU 1449  CG  TYR B  77     3737   4608   5211   -539    -64   1964       C  
ATOM   1450  CD1 TYR B  77      45.632 -39.666   2.410  1.00 34.99           C  
ANISOU 1450  CD1 TYR B  77     3707   4214   5374   -596   -180   1771       C  
ATOM   1451  CD2 TYR B  77      45.606 -39.715   4.796  1.00 38.77           C  
ANISOU 1451  CD2 TYR B  77     4029   5086   5617   -532    -99   2151       C  
ATOM   1452  CE1 TYR B  77      46.248 -40.910   2.388  1.00 40.36           C  
ANISOU 1452  CE1 TYR B  77     4337   4643   6356   -669   -326   1832       C  
ATOM   1453  CE2 TYR B  77      46.223 -40.955   4.783  1.00 42.10           C  
ANISOU 1453  CE2 TYR B  77     4404   5269   6322   -602   -243   2204       C  
ATOM   1454  CZ  TYR B  77      46.539 -41.546   3.577  1.00 41.64           C  
ANISOU 1454  CZ  TYR B  77     4402   4884   6537   -663   -360   2038       C  
ATOM   1455  OH  TYR B  77      47.150 -42.777   3.564  1.00 51.75           O  
ANISOU 1455  OH  TYR B  77     5631   5932   8101   -701   -521   2051       O  
ATOM   1456  N   TYR B  78      45.086 -34.608   2.159  1.00 27.59           N  
ANISOU 1456  N   TYR B  78     3123   3909   3453   -209    217   1216       N  
ATOM   1457  CA  TYR B  78      44.398 -33.390   1.759  1.00 29.33           C  
ANISOU 1457  CA  TYR B  78     3397   4236   3510   -131    269   1091       C  
ATOM   1458  C   TYR B  78      43.337 -33.745   0.729  1.00 33.30           C  
ANISOU 1458  C   TYR B  78     3854   4664   4136   -208    230   1098       C  
ATOM   1459  O   TYR B  78      43.611 -34.481  -0.224  1.00 35.20           O  
ANISOU 1459  O   TYR B  78     4118   4698   4558   -294    155   1027       O  
ATOM   1460  CB  TYR B  78      45.383 -32.366   1.191  1.00 23.19           C  
ANISOU 1460  CB  TYR B  78     2787   3372   2652    -72    277    848       C  
ATOM   1461  CG  TYR B  78      46.330 -31.821   2.236  1.00 25.63           C  
ANISOU 1461  CG  TYR B  78     3139   3766   2833     17    300    818       C  
ATOM   1462  CD1 TYR B  78      47.367 -32.602   2.738  1.00 27.68           C  
ANISOU 1462  CD1 TYR B  78     3389   3956   3172    -17    274    872       C  
ATOM   1463  CD2 TYR B  78      46.180 -30.532   2.731  1.00 26.27           C  
ANISOU 1463  CD2 TYR B  78     3265   3988   2729    145    327    724       C  
ATOM   1464  CE1 TYR B  78      48.230 -32.112   3.705  1.00 29.29           C  
ANISOU 1464  CE1 TYR B  78     3626   4245   3257     67    281    840       C  
ATOM   1465  CE2 TYR B  78      47.038 -30.031   3.695  1.00 27.50           C  
ANISOU 1465  CE2 TYR B  78     3455   4217   2776    236    322    671       C  
ATOM   1466  CZ  TYR B  78      48.066 -30.825   4.175  1.00 26.30           C  
ANISOU 1466  CZ  TYR B  78     3293   4009   2689    192    303    733       C  
ATOM   1467  OH  TYR B  78      48.925 -30.336   5.136  1.00 25.32           O  
ANISOU 1467  OH  TYR B  78     3201   3965   2457    284    285    676       O  
ATOM   1468  N   ARG B  79      42.128 -33.247   0.933  1.00 23.47           N  
ANISOU 1468  N   ARG B  79     2531   3596   2792   -165    271   1170       N  
ATOM   1469  CA  ARG B  79      41.023 -33.510   0.028  1.00 22.45           C  
ANISOU 1469  CA  ARG B  79     2342   3418   2770   -231    228   1186       C  
ATOM   1470  C   ARG B  79      40.451 -32.189  -0.478  1.00 27.14           C  
ANISOU 1470  C   ARG B  79     3008   4098   3206   -134    263   1039       C  
ATOM   1471  O   ARG B  79      40.415 -31.195   0.251  1.00 28.02           O  
ANISOU 1471  O   ARG B  79     3137   4377   3130     -8    325   1006       O  
ATOM   1472  CB  ARG B  79      39.939 -34.343   0.730  1.00 22.23           C  
ANISOU 1472  CB  ARG B  79     2102   3520   2826   -295    225   1469       C  
ATOM   1473  CG  ARG B  79      38.731 -34.676  -0.145  1.00 30.16           C  
ANISOU 1473  CG  ARG B  79     3018   4472   3968   -373    162   1502       C  
ATOM   1474  CD  ARG B  79      37.749 -35.606   0.570  1.00 26.40           C  
ANISOU 1474  CD  ARG B  79     2305   4109   3618   -464    146   1824       C  
ATOM   1475  NE  ARG B  79      38.329 -36.917   0.839  1.00 32.75           N  
ANISOU 1475  NE  ARG B  79     3046   4735   4661   -588     55   1978       N  
ATOM   1476  CZ  ARG B  79      38.453 -37.876  -0.073  1.00 36.41           C  
ANISOU 1476  CZ  ARG B  79     3517   4904   5414   -705    -95   1920       C  
ATOM   1477  NH1 ARG B  79      38.051 -37.664  -1.321  1.00 25.74           N1+
ANISOU 1477  NH1 ARG B  79     2235   3432   4115   -712   -159   1710       N1+
ATOM   1478  NH2 ARG B  79      38.980 -39.048   0.262  1.00 34.42           N  
ANISOU 1478  NH2 ARG B  79     3200   4479   5399   -801   -197   2058       N  
ATOM   1479  N   VAL B  80      40.028 -32.173  -1.738  1.00 23.74           N  
ANISOU 1479  N   VAL B  80     2617   3547   2855   -184    207    938       N  
ATOM   1480  CA  VAL B  80      39.269 -31.061  -2.292  1.00 19.03           C  
ANISOU 1480  CA  VAL B  80     2060   3024   2147   -109    218    843       C  
ATOM   1481  C   VAL B  80      37.967 -31.614  -2.860  1.00 23.82           C  
ANISOU 1481  C   VAL B  80     2543   3640   2867   -179    166    929       C  
ATOM   1482  O   VAL B  80      37.948 -32.699  -3.451  1.00 28.70           O  
ANISOU 1482  O   VAL B  80     3122   4111   3670   -295     85    952       O  
ATOM   1483  CB  VAL B  80      40.081 -30.281  -3.353  1.00 22.91           C  
ANISOU 1483  CB  VAL B  80     2727   3384   2592    -93    193    640       C  
ATOM   1484  CG1 VAL B  80      40.360 -31.129  -4.594  1.00 22.57           C  
ANISOU 1484  CG1 VAL B  80     2715   3176   2684   -198    120    565       C  
ATOM   1485  CG2 VAL B  80      39.393 -28.964  -3.712  1.00 22.88           C  
ANISOU 1485  CG2 VAL B  80     2766   3455   2473      0    195    570       C  
ATOM   1486  N   THR B  81      36.871 -30.886  -2.639  1.00 27.75           N  
ANISOU 1486  N   THR B  81     2967   4308   3268   -100    198    968       N  
ATOM   1487  CA  THR B  81      35.551 -31.260  -3.140  1.00 26.94           C  
ANISOU 1487  CA  THR B  81     2732   4240   3264   -156    149   1053       C  
ATOM   1488  C   THR B  81      34.970 -30.091  -3.924  1.00 27.34           C  
ANISOU 1488  C   THR B  81     2854   4318   3215    -69    132    916       C  
ATOM   1489  O   THR B  81      34.900 -28.968  -3.414  1.00 25.22           O  
ANISOU 1489  O   THR B  81     2619   4174   2791     71    185    862       O  
ATOM   1490  CB  THR B  81      34.601 -31.650  -2.000  1.00 26.33           C  
ANISOU 1490  CB  THR B  81     2433   4389   3183   -149    206   1292       C  
ATOM   1491  CG2 THR B  81      33.296 -32.233  -2.557  1.00 27.58           C  
ANISOU 1491  CG2 THR B  81     2430   4552   3497   -241    136   1406       C  
ATOM   1492  OG1 THR B  81      35.231 -32.628  -1.161  1.00 33.57           O  
ANISOU 1492  OG1 THR B  81     3286   5293   4174   -222    220   1450       O  
ATOM   1493  N   ALA B  82      34.561 -30.356  -5.160  1.00 23.38           N  
ANISOU 1493  N   ALA B  82     2373   3700   2810   -142     40    853       N  
ATOM   1494  CA  ALA B  82      33.989 -29.351  -6.043  1.00 21.63           C  
ANISOU 1494  CA  ALA B  82     2214   3493   2512    -77      2    747       C  
ATOM   1495  C   ALA B  82      32.490 -29.587  -6.168  1.00 27.25           C  
ANISOU 1495  C   ALA B  82     2751   4305   3297    -94    -38    849       C  
ATOM   1496  O   ALA B  82      32.058 -30.720  -6.405  1.00 29.72           O  
ANISOU 1496  O   ALA B  82     2953   4560   3780   -215   -103    934       O  
ATOM   1497  CB  ALA B  82      34.655 -29.404  -7.419  1.00 25.07           C  
ANISOU 1497  CB  ALA B  82     2795   3765   2965   -135    -75    598       C  
ATOM   1498  N   THR B  83      31.698 -28.523  -6.023  1.00 24.52           N  
ANISOU 1498  N   THR B  83     2374   4096   2846     29    -16    836       N  
ATOM   1499  CA  THR B  83      30.247 -28.660  -6.003  1.00 28.32           C  
ANISOU 1499  CA  THR B  83     2665   4712   3385     33    -39    943       C  
ATOM   1500  C   THR B  83      29.587 -27.548  -6.804  1.00 26.02           C  
ANISOU 1500  C   THR B  83     2424   4433   3027    129    -97    837       C  
ATOM   1501  O   THR B  83      30.016 -26.392  -6.742  1.00 26.85           O  
ANISOU 1501  O   THR B  83     2655   4535   3013    252    -80    730       O  
ATOM   1502  CB  THR B  83      29.702 -28.635  -4.565  1.00 34.66           C  
ANISOU 1502  CB  THR B  83     3283   5765   4122    115     71   1094       C  
ATOM   1503  CG2 THR B  83      28.192 -28.903  -4.545  1.00 31.91           C  
ANISOU 1503  CG2 THR B  83     2698   5578   3848    100     53   1236       C  
ATOM   1504  OG1 THR B  83      30.366 -29.634  -3.783  1.00 44.34           O  
ANISOU 1504  OG1 THR B  83     4461   6984   5401     24    119   1222       O  
ATOM   1505  N   ASN B  84      28.548 -27.909  -7.550  1.00 29.55           N  
ANISOU 1505  N   ASN B  84     2768   4884   3576     69   -184    875       N  
ATOM   1506  CA  ASN B  84      27.624 -26.944  -8.138  1.00 30.69           C  
ANISOU 1506  CA  ASN B  84     2898   5086   3676    166   -242    823       C  
ATOM   1507  C   ASN B  84      26.214 -27.509  -7.959  1.00 36.61           C  
ANISOU 1507  C   ASN B  84     3398   5975   4536    131   -265    962       C  
ATOM   1508  O   ASN B  84      25.995 -28.476  -7.222  1.00 35.24           O  
ANISOU 1508  O   ASN B  84     3060   5875   4454     47   -219   1119       O  
ATOM   1509  CB  ASN B  84      27.988 -26.639  -9.600  1.00 32.90           C  
ANISOU 1509  CB  ASN B  84     3353   5205   3944    126   -356    696       C  
ATOM   1510  CG  ASN B  84      27.921 -27.864 -10.510  1.00 32.39           C  
ANISOU 1510  CG  ASN B  84     3263   5034   4008    -33   -456    689       C  
ATOM   1511  ND2 ASN B  84      28.562 -27.762 -11.667  1.00 26.24           N  
ANISOU 1511  ND2 ASN B  84     2643   4148   3177    -65   -531    567       N  
ATOM   1512  OD1 ASN B  84      27.279 -28.872 -10.192  1.00 34.75           O  
ANISOU 1512  OD1 ASN B  84     3390   5357   4457   -122   -479    793       O  
ATOM   1513  N   THR B  85      25.235 -26.917  -8.649  1.00 40.03           N  
ANISOU 1513  N   THR B  85     3787   6448   4975    188   -346    929       N  
ATOM   1514  CA  THR B  85      23.851 -27.366  -8.510  1.00 42.73           C  
ANISOU 1514  CA  THR B  85     3874   6935   5428    160   -373   1064       C  
ATOM   1515  C   THR B  85      23.597 -28.726  -9.150  1.00 45.58           C  
ANISOU 1515  C   THR B  85     4151   7174   5994    -43   -484   1135       C  
ATOM   1516  O   THR B  85      22.548 -29.325  -8.892  1.00 44.78           O  
ANISOU 1516  O   THR B  85     3808   7177   6030   -107   -509   1290       O  
ATOM   1517  CB  THR B  85      22.870 -26.346  -9.114  1.00 41.88           C  
ANISOU 1517  CB  THR B  85     3737   6893   5282    284   -447    999       C  
ATOM   1518  CG2 THR B  85      22.678 -25.168  -8.181  1.00 42.80           C  
ANISOU 1518  CG2 THR B  85     3822   7183   5257    504   -352    960       C  
ATOM   1519  OG1 THR B  85      23.365 -25.882 -10.374  1.00 42.68           O  
ANISOU 1519  OG1 THR B  85     4057   6812   5349    270   -560    858       O  
ATOM   1520  N   ALA B  86      24.516 -29.226  -9.974  1.00 46.65           N  
ANISOU 1520  N   ALA B  86     4463   7097   6165   -140   -563   1021       N  
ATOM   1521  CA  ALA B  86      24.315 -30.503 -10.642  1.00 38.37           C  
ANISOU 1521  CA  ALA B  86     3345   5907   5328   -310   -705   1035       C  
ATOM   1522  C   ALA B  86      24.938 -31.686  -9.911  1.00 41.35           C  
ANISOU 1522  C   ALA B  86     3663   6200   5849   -433   -677   1143       C  
ATOM   1523  O   ALA B  86      24.630 -32.830 -10.255  1.00 52.27           O  
ANISOU 1523  O   ALA B  86     4937   7456   7466   -578   -813   1187       O  
ATOM   1524  CB  ALA B  86      24.871 -30.445 -12.071  1.00 38.42           C  
ANISOU 1524  CB  ALA B  86     3552   5757   5287   -326   -834    821       C  
ATOM   1525  N   GLY B  87      25.795 -31.455  -8.927  1.00 32.66           N  
ANISOU 1525  N   GLY B  87     2626   5150   4635   -381   -528   1185       N  
ATOM   1526  CA  GLY B  87      26.383 -32.556  -8.196  1.00 30.82           C  
ANISOU 1526  CA  GLY B  87     2329   4841   4539   -494   -508   1311       C  
ATOM   1527  C   GLY B  87      27.724 -32.170  -7.607  1.00 31.61           C  
ANISOU 1527  C   GLY B  87     2608   4927   4477   -423   -385   1244       C  
ATOM   1528  O   GLY B  87      28.124 -31.008  -7.626  1.00 33.29           O  
ANISOU 1528  O   GLY B  87     2968   5203   4478   -286   -308   1122       O  
ATOM   1529  N   SER B  88      28.408 -33.183  -7.084  1.00 38.25           N  
ANISOU 1529  N   SER B  88     3422   5666   5445   -524   -387   1333       N  
ATOM   1530  CA  SER B  88      29.685 -32.999  -6.418  1.00 39.82           C  
ANISOU 1530  CA  SER B  88     3759   5851   5521   -474   -280   1297       C  
ATOM   1531  C   SER B  88      30.666 -34.069  -6.876  1.00 40.25           C  
ANISOU 1531  C   SER B  88     3898   5653   5743   -585   -380   1219       C  
ATOM   1532  O   SER B  88      30.280 -35.154  -7.321  1.00 37.09           O  
ANISOU 1532  O   SER B  88     3395   5105   5593   -712   -528   1257       O  
ATOM   1533  CB  SER B  88      29.536 -33.050  -4.893  1.00 42.24           C  
ANISOU 1533  CB  SER B  88     3910   6371   5769   -444   -145   1531       C  
ATOM   1534  OG  SER B  88      29.294 -34.375  -4.462  1.00 61.89           O  
ANISOU 1534  OG  SER B  88     6213   8804   8497   -601   -205   1760       O  
ATOM   1535  N   THR B  89      31.949 -33.738  -6.770  1.00 34.19           N  
ANISOU 1535  N   THR B  89     3311   4832   4848   -529   -314   1095       N  
ATOM   1536  CA  THR B  89      33.021 -34.684  -7.031  1.00 34.34           C  
ANISOU 1536  CA  THR B  89     3406   4642   5002   -603   -386   1014       C  
ATOM   1537  C   THR B  89      34.182 -34.337  -6.108  1.00 35.88           C  
ANISOU 1537  C   THR B  89     3695   4879   5059   -541   -256   1029       C  
ATOM   1538  O   THR B  89      34.350 -33.181  -5.713  1.00 31.03           O  
ANISOU 1538  O   THR B  89     3158   4410   4222   -425   -140    998       O  
ATOM   1539  CB  THR B  89      33.448 -34.661  -8.508  1.00 33.71           C  
ANISOU 1539  CB  THR B  89     3474   4424   4909   -595   -492    745       C  
ATOM   1540  CG2 THR B  89      33.971 -33.288  -8.900  1.00 35.01           C  
ANISOU 1540  CG2 THR B  89     3817   4687   4799   -475   -393    608       C  
ATOM   1541  OG1 THR B  89      34.477 -35.633  -8.729  1.00 43.81           O  
ANISOU 1541  OG1 THR B  89     4805   5517   6325   -646   -566    645       O  
ATOM   1542  N   SER B  90      34.983 -35.346  -5.766  1.00 29.79           N  
ANISOU 1542  N   SER B  90     2914   3966   4441   -614   -298   1069       N  
ATOM   1543  CA  SER B  90      35.996 -35.182  -4.737  1.00 31.59           C  
ANISOU 1543  CA  SER B  90     3194   4243   4568   -568   -189   1125       C  
ATOM   1544  C   SER B  90      37.215 -36.027  -5.079  1.00 24.57           C  
ANISOU 1544  C   SER B  90     2389   3133   3813   -615   -265   1008       C  
ATOM   1545  O   SER B  90      37.093 -37.087  -5.697  1.00 27.74           O  
ANISOU 1545  O   SER B  90     2736   3347   4455   -703   -415    971       O  
ATOM   1546  CB  SER B  90      35.432 -35.576  -3.368  1.00 24.94           C  
ANISOU 1546  CB  SER B  90     2159   3556   3761   -600   -131   1429       C  
ATOM   1547  OG  SER B  90      36.374 -35.351  -2.339  1.00 32.36           O  
ANISOU 1547  OG  SER B  90     3148   4577   4571   -539    -30   1478       O  
ATOM   1548  N   CYS B  91      38.392 -35.549  -4.678  1.00 23.22           N  
ANISOU 1548  N   CYS B  91     2343   2981   3500   -546   -176    935       N  
ATOM   1549  CA  CYS B  91      39.602 -36.359  -4.778  1.00 31.93           C  
ANISOU 1549  CA  CYS B  91     3501   3904   4727   -577   -233    850       C  
ATOM   1550  C   CYS B  91      40.555 -35.964  -3.658  1.00 28.29           C  
ANISOU 1550  C   CYS B  91     3087   3528   4135   -520   -120    919       C  
ATOM   1551  O   CYS B  91      40.468 -34.868  -3.103  1.00 31.30           O  
ANISOU 1551  O   CYS B  91     3507   4088   4298   -434     -7    941       O  
ATOM   1552  CB  CYS B  91      40.278 -36.216  -6.150  1.00 30.62           C  
ANISOU 1552  CB  CYS B  91     3473   3635   4526   -545   -283    561       C  
ATOM   1553  SG  CYS B  91      41.097 -34.629  -6.459  1.00 33.14           S  
ANISOU 1553  SG  CYS B  91     3972   4088   4531   -434   -145    414       S  
ATOM   1554  N   GLN B  92      41.473 -36.868  -3.326  1.00 32.06           N  
ANISOU 1554  N   GLN B  92     3556   3866   4760   -559   -172    939       N  
ATOM   1555  CA  GLN B  92      42.405 -36.620  -2.236  1.00 31.73           C  
ANISOU 1555  CA  GLN B  92     3546   3896   4612   -510    -86   1012       C  
ATOM   1556  C   GLN B  92      43.797 -37.120  -2.607  1.00 30.75           C  
ANISOU 1556  C   GLN B  92     3509   3596   4579   -507   -136    851       C  
ATOM   1557  O   GLN B  92      43.970 -37.951  -3.502  1.00 29.69           O  
ANISOU 1557  O   GLN B  92     3370   3276   4633   -548   -253    723       O  
ATOM   1558  CB  GLN B  92      41.944 -37.288  -0.931  1.00 30.66           C  
ANISOU 1558  CB  GLN B  92     3246   3847   4556   -561    -85   1326       C  
ATOM   1559  CG  GLN B  92      42.304 -38.761  -0.840  1.00 40.93           C  
ANISOU 1559  CG  GLN B  92     4458   4924   6169   -666   -225   1433       C  
ATOM   1560  CD  GLN B  92      42.141 -39.339   0.557  1.00 41.31           C  
ANISOU 1560  CD  GLN B  92     4352   5078   6266   -714   -214   1779       C  
ATOM   1561  NE2 GLN B  92      42.456 -40.618   0.696  1.00 41.46           N  
ANISOU 1561  NE2 GLN B  92     4288   4886   6579   -804   -357   1894       N  
ATOM   1562  OE1 GLN B  92      41.732 -38.651   1.496  1.00 41.84           O  
ANISOU 1562  OE1 GLN B  92     4370   5427   6102   -655    -88   1929       O  
ATOM   1563  N   ALA B  93      44.794 -36.588  -1.904  1.00 25.08           N  
ANISOU 1563  N   ALA B  93     2861   2947   3723   -444    -53    841       N  
ATOM   1564  CA  ALA B  93      46.169 -37.047  -2.035  1.00 30.22           C  
ANISOU 1564  CA  ALA B  93     3569   3459   4453   -434    -88    721       C  
ATOM   1565  C   ALA B  93      46.837 -36.991  -0.671  1.00 26.59           C  
ANISOU 1565  C   ALA B  93     3092   3080   3933   -405    -38    870       C  
ATOM   1566  O   ALA B  93      46.336 -36.365   0.265  1.00 30.35           O  
ANISOU 1566  O   ALA B  93     3536   3748   4245   -367     39   1012       O  
ATOM   1567  CB  ALA B  93      46.961 -36.211  -3.047  1.00 23.79           C  
ANISOU 1567  CB  ALA B  93     2889   2648   3501   -376    -41    466       C  
ATOM   1568  N   HIS B  94      47.987 -37.644  -0.571  1.00 25.54           N  
ANISOU 1568  N   HIS B  94     2971   2812   3919   -407    -90    820       N  
ATOM   1569  CA  HIS B  94      48.756 -37.677   0.663  1.00 20.61           C  
ANISOU 1569  CA  HIS B  94     2333   2251   3249   -378    -64    948       C  
ATOM   1570  C   HIS B  94      49.964 -36.755   0.548  1.00 21.58           C  
ANISOU 1570  C   HIS B  94     2576   2406   3216   -302      3    758       C  
ATOM   1571  O   HIS B  94      50.586 -36.653  -0.511  1.00 26.75           O  
ANISOU 1571  O   HIS B  94     3297   2967   3899   -293     -5    548       O  
ATOM   1572  CB  HIS B  94      49.218 -39.102   0.981  1.00 28.93           C  
ANISOU 1572  CB  HIS B  94     3296   3118   4580   -438   -190   1060       C  
ATOM   1573  CG  HIS B  94      49.976 -39.216   2.266  1.00 26.75           C  
ANISOU 1573  CG  HIS B  94     2991   2913   4258   -411   -177   1220       C  
ATOM   1574  CD2 HIS B  94      49.549 -39.264   3.550  1.00 27.93           C  
ANISOU 1574  CD2 HIS B  94     3050   3241   4320   -415   -148   1500       C  
ATOM   1575  ND1 HIS B  94      51.352 -39.282   2.318  1.00 30.47           N  
ANISOU 1575  ND1 HIS B  94     3521   3300   4755   -366   -195   1092       N  
ATOM   1576  CE1 HIS B  94      51.739 -39.377   3.578  1.00 30.36           C  
ANISOU 1576  CE1 HIS B  94     3463   3388   4683   -347   -190   1282       C  
ATOM   1577  NE2 HIS B  94      50.665 -39.368   4.345  1.00 31.49           N  
ANISOU 1577  NE2 HIS B  94     3516   3703   4744   -373   -159   1532       N  
ATOM   1578  N   LEU B  95      50.278 -36.074   1.640  1.00 23.62           N  
ANISOU 1578  N   LEU B  95     2851   2818   3306   -243     63    836       N  
ATOM   1579  CA  LEU B  95      51.494 -35.285   1.764  1.00 21.89           C  
ANISOU 1579  CA  LEU B  95     2722   2615   2979   -181     98    693       C  
ATOM   1580  C   LEU B  95      52.324 -35.871   2.890  1.00 24.75           C  
ANISOU 1580  C   LEU B  95     3039   2981   3386   -166     60    811       C  
ATOM   1581  O   LEU B  95      51.820 -36.047   4.004  1.00 25.36           O  
ANISOU 1581  O   LEU B  95     3042   3197   3395   -152     64   1013       O  
ATOM   1582  CB  LEU B  95      51.187 -33.821   2.062  1.00 20.23           C  
ANISOU 1582  CB  LEU B  95     2579   2569   2537   -106    170    639       C  
ATOM   1583  CG  LEU B  95      52.370 -32.958   2.497  1.00 24.73           C  
ANISOU 1583  CG  LEU B  95     3221   3162   3011    -44    179    532       C  
ATOM   1584  CD1 LEU B  95      53.362 -32.766   1.354  1.00 19.38           C  
ANISOU 1584  CD1 LEU B  95     2605   2349   2408    -77    177    360       C  
ATOM   1585  CD2 LEU B  95      51.881 -31.609   3.025  1.00 22.03           C  
ANISOU 1585  CD2 LEU B  95     2922   2974   2473     46    209    494       C  
ATOM   1586  N   GLN B  96      53.586 -36.173   2.597  1.00 23.62           N  
ANISOU 1586  N   GLN B  96     2924   2708   3344   -164     25    693       N  
ATOM   1587  CA  GLN B  96      54.554 -36.605   3.599  1.00 19.28           C  
ANISOU 1587  CA  GLN B  96     2341   2154   2831   -140    -19    776       C  
ATOM   1588  C   GLN B  96      55.604 -35.509   3.711  1.00 19.00           C  
ANISOU 1588  C   GLN B  96     2388   2172   2658    -78     21    620       C  
ATOM   1589  O   GLN B  96      56.339 -35.256   2.754  1.00 25.52           O  
ANISOU 1589  O   GLN B  96     3257   2907   3530    -86     33    442       O  
ATOM   1590  CB  GLN B  96      55.194 -37.941   3.217  1.00 21.60           C  
ANISOU 1590  CB  GLN B  96     2578   2234   3396   -182   -119    769       C  
ATOM   1591  CG  GLN B  96      56.195 -38.458   4.246  1.00 29.08           C  
ANISOU 1591  CG  GLN B  96     3482   3162   4405   -157   -180    872       C  
ATOM   1592  CD  GLN B  96      55.516 -38.909   5.532  1.00 38.90           C  
ANISOU 1592  CD  GLN B  96     4637   4526   5616   -174   -209   1180       C  
ATOM   1593  NE2 GLN B  96      56.213 -38.774   6.651  1.00 41.23           N  
ANISOU 1593  NE2 GLN B  96     4919   4932   5813   -124   -221   1274       N  
ATOM   1594  OE1 GLN B  96      54.381 -39.379   5.513  1.00 44.94           O  
ANISOU 1594  OE1 GLN B  96     5334   5301   6440   -233   -222   1341       O  
ATOM   1595  N   VAL B  97      55.647 -34.825   4.853  1.00 27.59           N  
ANISOU 1595  N   VAL B  97     3485   3424   3574    -14     34    685       N  
ATOM   1596  CA  VAL B  97      56.686 -33.836   5.120  1.00 27.47           C  
ANISOU 1596  CA  VAL B  97     3534   3439   3465     43     34    548       C  
ATOM   1597  C   VAL B  97      57.780 -34.564   5.893  1.00 34.02           C  
ANISOU 1597  C   VAL B  97     4315   4232   4377     55    -32    609       C  
ATOM   1598  O   VAL B  97      57.621 -34.870   7.076  1.00 36.03           O  
ANISOU 1598  O   VAL B  97     4520   4613   4557     94    -63    769       O  
ATOM   1599  CB  VAL B  97      56.159 -32.626   5.894  1.00 23.02           C  
ANISOU 1599  CB  VAL B  97     3008   3062   2678    130     55    529       C  
ATOM   1600  CG1 VAL B  97      57.291 -31.628   6.125  1.00 17.06           C  
ANISOU 1600  CG1 VAL B  97     2312   2291   1879    178     17    375       C  
ATOM   1601  CG2 VAL B  97      55.003 -31.969   5.152  1.00 24.87           C  
ANISOU 1601  CG2 VAL B  97     3277   3324   2848    124    108    483       C  
ATOM   1602  N   GLU B  98      58.893 -34.843   5.223  1.00 27.58           N  
ANISOU 1602  N   GLU B  98     3504   3268   3708     30    -55    490       N  
ATOM   1603  CA  GLU B  98      59.954 -35.624   5.839  1.00 34.30           C  
ANISOU 1603  CA  GLU B  98     4300   4059   4673     43   -129    539       C  
ATOM   1604  C   GLU B  98      60.789 -34.756   6.770  1.00 30.50           C  
ANISOU 1604  C   GLU B  98     3845   3682   4061    108   -155    498       C  
ATOM   1605  O   GLU B  98      61.072 -33.591   6.474  1.00 22.81           O  
ANISOU 1605  O   GLU B  98     2931   2733   3002    123   -130    355       O  
ATOM   1606  CB  GLU B  98      60.829 -36.266   4.763  1.00 36.67           C  
ANISOU 1606  CB  GLU B  98     4575   4182   5177     12   -146    404       C  
ATOM   1607  CG  GLU B  98      60.050 -37.221   3.871  1.00 42.54           C  
ANISOU 1607  CG  GLU B  98     5286   4809   6069    -34   -156    410       C  
ATOM   1608  CD  GLU B  98      60.861 -37.719   2.699  1.00 47.95           C  
ANISOU 1608  CD  GLU B  98     5945   5364   6911    -30   -169    218       C  
ATOM   1609  OE1 GLU B  98      62.025 -37.286   2.563  1.00 48.47           O  
ANISOU 1609  OE1 GLU B  98     6008   5448   6963     -2   -150    104       O  
ATOM   1610  OE2 GLU B  98      60.333 -38.534   1.911  1.00 52.62           O1-
ANISOU 1610  OE2 GLU B  98     6505   5849   7638    -49   -203    174       O1-
ATOM   1611  N   ARG B  99      61.159 -35.328   7.912  1.00 27.02           N  
ANISOU 1611  N   ARG B  99     3351   3299   3615    144   -225    636       N  
ATOM   1612  CA  ARG B  99      61.930 -34.592   8.902  1.00 22.75           C  
ANISOU 1612  CA  ARG B  99     2827   2873   2944    218   -275    593       C  
ATOM   1613  C   ARG B  99      63.326 -34.285   8.377  1.00 25.85           C  
ANISOU 1613  C   ARG B  99     3227   3136   3460    205   -303    423       C  
ATOM   1614  O   ARG B  99      63.944 -35.096   7.680  1.00 21.48           O  
ANISOU 1614  O   ARG B  99     2628   2434   3101    163   -310    397       O  
ATOM   1615  CB  ARG B  99      62.034 -35.385  10.204  1.00 25.91           C  
ANISOU 1615  CB  ARG B  99     3156   3385   3304    260   -348    801       C  
ATOM   1616  CG  ARG B  99      60.722 -35.616  10.951  1.00 35.30           C  
ANISOU 1616  CG  ARG B  99     4305   4778   4331    282   -318   1014       C  
ATOM   1617  CD  ARG B  99      60.903 -36.741  11.967  1.00 38.12           C  
ANISOU 1617  CD  ARG B  99     4560   5200   4723    284   -395   1283       C  
ATOM   1618  NE  ARG B  99      61.088 -38.026  11.298  1.00 42.65           N  
ANISOU 1618  NE  ARG B  99     5079   5520   5607    188   -441   1379       N  
ATOM   1619  CZ  ARG B  99      61.489 -39.144  11.896  1.00 42.27           C  
ANISOU 1619  CZ  ARG B  99     4941   5416   5702    168   -541   1594       C  
ATOM   1620  NH1 ARG B  99      61.763 -39.155  13.197  1.00 39.64           N1+
ANISOU 1620  NH1 ARG B  99     4562   5296   5205    231   -593   1762       N1+
ATOM   1621  NH2 ARG B  99      61.620 -40.255  11.182  1.00 44.16           N  
ANISOU 1621  NH2 ARG B  99     5133   5389   6258     93   -605   1634       N  
ATOM   1622  N   LEU B 100      63.823 -33.099   8.720  1.00 20.85           N  
ANISOU 1622  N   LEU B 100     2636   2563   2722    247   -331    301       N  
ATOM   1623  CA  LEU B 100      65.190 -32.759   8.358  1.00 24.35           C  
ANISOU 1623  CA  LEU B 100     3061   2906   3285    226   -369    173       C  
ATOM   1624  C   LEU B 100      66.183 -33.636   9.107  1.00 28.70           C  
ANISOU 1624  C   LEU B 100     3539   3438   3927    255   -455    240       C  
ATOM   1625  O   LEU B 100      67.151 -34.129   8.516  1.00 31.28           O  
ANISOU 1625  O   LEU B 100     3808   3645   4431    223   -462    188       O  
ATOM   1626  CB  LEU B 100      65.448 -31.279   8.639  1.00 27.75           C  
ANISOU 1626  CB  LEU B 100     3543   3382   3618    257   -415     43       C  
ATOM   1627  CG  LEU B 100      66.469 -30.600   7.729  1.00 36.76           C  
ANISOU 1627  CG  LEU B 100     4666   4405   4896    188   -414    -78       C  
ATOM   1628  CD1 LEU B 100      65.972 -30.597   6.294  1.00 34.20           C  
ANISOU 1628  CD1 LEU B 100     4353   4018   4623    109   -298    -93       C  
ATOM   1629  CD2 LEU B 100      66.750 -29.182   8.204  1.00 35.53           C  
ANISOU 1629  CD2 LEU B 100     4548   4261   4689    217   -510   -186       C  
ATOM   1630  N   ARG B 101      65.943 -33.860  10.400  1.00 23.14           N  
ANISOU 1630  N   ARG B 101     2824   2872   3095    325   -522    362       N  
ATOM   1631  CA  ARG B 101      66.800 -34.685  11.246  1.00 25.81           C  
ANISOU 1631  CA  ARG B 101     3093   3215   3499    359   -621    462       C  
ATOM   1632  C   ARG B 101      68.198 -34.078  11.315  1.00 32.74           C  
ANISOU 1632  C   ARG B 101     3952   4042   4446    373   -695    309       C  
ATOM   1633  O   ARG B 101      68.324 -32.847  11.326  1.00 25.57           O  
ANISOU 1633  O   ARG B 101     3093   3171   3453    387   -709    167       O  
ATOM   1634  CB  ARG B 101      66.838 -36.131  10.739  1.00 31.47           C  
ANISOU 1634  CB  ARG B 101     3742   3781   4436    308   -619    580       C  
ATOM   1635  CG  ARG B 101      65.448 -36.688  10.430  1.00 40.40           C  
ANISOU 1635  CG  ARG B 101     4880   4917   5553    268   -554    716       C  
ATOM   1636  CD  ARG B 101      65.443 -38.200  10.288  1.00 44.92           C  
ANISOU 1636  CD  ARG B 101     5371   5336   6360    231   -612    869       C  
ATOM   1637  NE  ARG B 101      65.605 -38.873  11.571  1.00 51.29           N  
ANISOU 1637  NE  ARG B 101     6113   6229   7146    265   -715   1105       N  
ATOM   1638  CZ  ARG B 101      65.446 -40.180  11.750  1.00 60.39           C  
ANISOU 1638  CZ  ARG B 101     7183   7266   8496    231   -798   1316       C  
ATOM   1639  NH1 ARG B 101      65.117 -40.951  10.722  1.00 63.60           N1+
ANISOU 1639  NH1 ARG B 101     7567   7453   9143    173   -800   1281       N1+
ATOM   1640  NH2 ARG B 101      65.620 -40.717  12.951  1.00 63.68           N  
ANISOU 1640  NH2 ARG B 101     7533   7785   8876    258   -896   1563       N  
HETATM 1641  O1  SO4 B 197      42.222 -21.835 -18.554  1.00 34.51           O  
HETATM 1642  O2  SO4 B 197      40.774 -23.610 -19.289  1.00 43.81           O  
HETATM 1643  O3  SO4 B 197      41.087 -23.210 -16.972  1.00 46.34           O1-
HETATM 1644  O4  SO4 B 197      39.854 -21.659 -18.277  1.00 38.46           O  
HETATM 1645  S   SO4 B 197      40.988 -22.579 -18.283  1.00 40.51           S  
HETATM 1646  O1  SO4 B 198      39.781 -41.015  -3.829  1.00 99.60           O  
HETATM 1647  O2  SO4 B 198      37.925 -39.613  -3.315  1.00 94.07           O  
HETATM 1648  O3  SO4 B 198      39.172 -40.651  -1.552  1.00 90.81           O1-
HETATM 1649  O4  SO4 B 198      37.771 -41.969  -2.964  1.00 97.38           O  
HETATM 1650  S   SO4 B 198      38.662 -40.811  -2.913  1.00 96.09           S  
HETATM 1651  O1  SO4 B 199      65.095 -43.657  11.188  1.00 97.26           O  
HETATM 1652  O2  SO4 B 199      62.766 -43.985  10.809  1.00 99.13           O  
HETATM 1653  O3  SO4 B 199      63.945 -45.406  12.328  1.00103.82           O1-
HETATM 1654  O4  SO4 B 199      63.509 -43.134  12.907  1.00 97.86           O  
HETATM 1655  S   SO4 B 199      63.830 -44.044  11.809  1.00100.37           S  
HETATM 1656  O   HOH B 297      41.208 -39.291  -4.487  1.00 28.31           O  
HETATM 1657  O   HOH B 298      34.329 -29.861   3.447  1.00 54.29           O  
HETATM 1658  O   HOH B 299      65.937 -28.707   2.752  1.00 27.77           O  
HETATM 1659  O   HOH B 300      60.812 -25.167  -1.552  1.00 30.18           O  
HETATM 1660  O   HOH B 301      48.060 -17.909   4.505  1.00 25.78           O  
HETATM 1661  O   HOH B 302      59.221 -31.863  -2.948  1.00 23.93           O  
HETATM 1662  O   HOH B 303      35.943 -22.473  -4.578  1.00 40.82           O  
HETATM 1663  O   HOH B 304      57.314 -36.435   9.154  1.00 37.47           O  
HETATM 1664  O   HOH B 305      64.369 -27.087   4.391  1.00 25.01           O  
HETATM 1665  O   HOH B 306      32.552 -28.308  -2.401  1.00 28.25           O  
HETATM 1666  O   HOH B 307      43.616 -37.639  -6.284  1.00 35.81           O  
HETATM 1667  O   HOH B 308      35.611 -23.911 -10.226  1.00 40.70           O  
HETATM 1668  O   HOH B 309      35.768 -35.968 -11.313  1.00 35.95           O  
HETATM 1669  O   HOH B 310      42.293 -42.584   2.524  1.00 45.28           O  
HETATM 1670  O   HOH B 311      53.020 -38.718  -0.017  1.00 34.14           O  
HETATM 1671  O   HOH B 312      43.631 -22.298 -16.262  1.00 27.07           O  
HETATM 1672  O   HOH B 313      31.339 -25.901  -1.997  1.00 36.29           O  
HETATM 1673  O   HOH B 314      49.777 -39.618  -6.857  1.00 41.56           O  
HETATM 1674  O   HOH B 315      49.113 -21.980 -14.465  1.00 30.45           O  
HETATM 1675  O   HOH B 316      36.753 -31.425   0.863  1.00 46.40           O  
HETATM 1676  O   HOH B 317      48.791 -23.889   8.163  1.00 39.25           O  
HETATM 1677  O   HOH B 318      68.317 -34.457   1.781  1.00 42.35           O  
HETATM 1678  O   HOH B 319      35.816 -24.702 -12.671  1.00 29.88           O  
HETATM 1679  O   HOH B 320      59.078 -22.976   2.198  1.00 24.81           O  
HETATM 1680  O   HOH B 321      50.475 -25.919   6.946  1.00 26.28           O  
HETATM 1681  O   HOH B 322      46.758 -26.266   8.110  1.00 49.81           O  
HETATM 1682  O   HOH B 323      48.163 -32.764 -10.462  1.00 49.74           O  
HETATM 1683  O   HOH B 324      38.098 -24.680   1.972  1.00 32.95           O  
HETATM 1684  O   HOH B 325      48.482 -32.474  -7.200  1.00 27.32           O  
HETATM 1685  O   HOH B 326      47.719 -43.162  -2.828  1.00 51.24           O  
HETATM 1686  O   HOH B 327      38.035 -24.333 -19.768  1.00 56.17           O  
HETATM 1687  O   HOH B 328      46.997 -41.209  -1.325  1.00 43.71           O  
HETATM 1688  O   HOH B 329      34.459 -25.023 -15.828  1.00 48.62           O  
HETATM 1689  O   HOH B 330      67.184 -36.156   6.437  1.00 50.51           O  
HETATM 1690  O   HOH B 331      39.007 -22.563  -3.339  1.00 26.76           O  
HETATM 1691  O   HOH B 332      64.815 -35.204   4.654  1.00 47.19           O  
HETATM 1692  O   HOH B 333      32.169 -30.750 -16.024  1.00 48.45           O  
HETATM 1693  O   HOH B 334      55.051 -39.978   9.107  1.00 50.50           O  
HETATM 1694  O   HOH B 335      36.427 -26.722   3.820  1.00 44.13           O  
HETATM 1695  O   HOH B 336      43.709 -27.451   9.027  1.00 52.33           O  
HETATM 1696  O   HOH B 337      31.483 -35.838  -3.029  1.00 44.24           O  
HETATM 1697  O   HOH B 338      47.087 -36.058 -13.387  1.00 50.00           O  
HETATM 1698  O   HOH B 339      40.756 -17.226 -11.950  1.00 47.65           O  
HETATM 1699  O   HOH B 340      26.607 -35.411  -6.092  1.00 56.84           O  
HETATM 1700  O   HOH B 341      41.600 -34.964 -18.679  1.00 39.61           O  
HETATM 1701  O   HOH B 342      42.022 -18.994 -19.669  1.00 28.25           O  
HETATM 1702  O   HOH B 343      36.815 -22.855   0.540  1.00 49.68           O  
HETATM 1703  O   HOH B 344      39.839 -40.501  -6.864  1.00 48.52           O  
HETATM 1704  O   HOH B 345      51.878 -41.931  -5.568  1.00 52.83           O  
HETATM 1705  O   HOH B 346      50.828 -22.056 -12.055  1.00 54.64           O  
HETATM 1706  O   HOH B 347      50.387 -35.136  11.282  1.00 66.23           O  
HETATM 1707  O   HOH B 348      40.587 -36.637   3.736  1.00 51.90           O  
HETATM 1708  O   HOH B 349      25.487 -33.298 -15.948  1.00 49.31           O  
HETATM 1709  O   HOH B 350      33.653 -38.608  -7.174  1.00 49.54           O  
HETATM 1710  O   HOH B 351      25.738 -25.418  -5.269  1.00 47.36           O  
HETATM 1711  O   HOH B 352      50.418 -20.990  -8.852  1.00 46.66           O  
HETATM 1712  O   HOH B 353      55.257 -18.447   3.368  1.00 56.67           O  
HETATM 1713  O   HOH B 354      46.256 -40.559  -5.476  1.00 50.80           O  
HETATM 1714  O   HOH B 355      35.606 -24.126   4.383  1.00 40.88           O  
HETATM 1715  O   HOH B 356      37.807 -17.907  -6.767  1.00 40.46           O  
HETATM 1716  O   HOH B 357      49.264 -39.380  -9.396  1.00 44.40           O  
ATOM   1717  N   THR C   4      25.560 -18.633  12.611  1.00 85.30           N  
ANISOU 1717  N   THR C   4    11650  11331   9428  -1490   3854   2510       N  
ATOM   1718  CA  THR C   4      25.571 -18.016  11.289  1.00 86.72           C  
ANISOU 1718  CA  THR C   4    11673  11294   9980  -1349   3743   2250       C  
ATOM   1719  C   THR C   4      25.823 -16.511  11.393  1.00 84.66           C  
ANISOU 1719  C   THR C   4    11412  11210   9545  -1198   3810   1915       C  
ATOM   1720  O   THR C   4      25.524 -15.896  12.418  1.00 94.34           O  
ANISOU 1720  O   THR C   4    12665  12708  10473  -1212   4023   1824       O  
ATOM   1721  CB  THR C   4      24.248 -18.267  10.540  1.00 91.58           C  
ANISOU 1721  CB  THR C   4    11979  11725  11091  -1420   3868   2198       C  
ATOM   1722  CG2 THR C   4      23.104 -17.505  11.194  1.00 93.39           C  
ANISOU 1722  CG2 THR C   4    12025  12166  11294  -1450   4205   2043       C  
ATOM   1723  OG1 THR C   4      24.379 -17.843   9.178  1.00 94.11           O  
ANISOU 1723  OG1 THR C   4    12163  11828  11767  -1298   3693   2002       O  
ATOM   1724  N   LEU C   5      26.376 -15.921  10.334  1.00 72.80           N  
ANISOU 1724  N   LEU C   5     9879   9549   8231  -1058   3629   1725       N  
ATOM   1725  CA  LEU C   5      26.714 -14.505  10.348  1.00 70.82           C  
ANISOU 1725  CA  LEU C   5     9643   9418   7846   -921   3656   1405       C  
ATOM   1726  C   LEU C   5      26.820 -13.980   8.922  1.00 66.40           C  
ANISOU 1726  C   LEU C   5     8937   8623   7667   -807   3511   1226       C  
ATOM   1727  O   LEU C   5      27.452 -14.607   8.067  1.00 53.06           O  
ANISOU 1727  O   LEU C   5     7291   6745   6123   -790   3280   1344       O  
ATOM   1728  CB  LEU C   5      28.026 -14.255  11.099  1.00 73.52           C  
ANISOU 1728  CB  LEU C   5    10278   9955   7701   -874   3506   1416       C  
ATOM   1729  CG  LEU C   5      28.369 -12.783  11.328  1.00 73.16           C  
ANISOU 1729  CG  LEU C   5    10267  10055   7475   -758   3540   1066       C  
ATOM   1730  CD1 LEU C   5      27.236 -12.083  12.068  1.00 74.18           C  
ANISOU 1730  CD1 LEU C   5    10256  10342   7586   -777   3862    884       C  
ATOM   1731  CD2 LEU C   5      29.677 -12.650  12.086  1.00 76.57           C  
ANISOU 1731  CD2 LEU C   5    10971  10691   7432   -732   3351   1090       C  
ATOM   1732  N   ARG C   6      26.213 -12.821   8.688  1.00 65.20           N  
ANISOU 1732  N   ARG C   6     8610   8488   7677   -726   3640    944       N  
ATOM   1733  CA  ARG C   6      26.226 -12.207   7.369  1.00 65.43           C  
ANISOU 1733  CA  ARG C   6     8474   8319   8067   -621   3509    780       C  
ATOM   1734  C   ARG C   6      27.660 -11.873   6.956  1.00 62.34           C  
ANISOU 1734  C   ARG C   6     8292   7905   7489   -531   3272    729       C  
ATOM   1735  O   ARG C   6      28.484 -11.517   7.806  1.00 68.56           O  
ANISOU 1735  O   ARG C   6     9308   8870   7870   -510   3249    680       O  
ATOM   1736  CB  ARG C   6      25.357 -10.945   7.385  1.00 76.03           C  
ANISOU 1736  CB  ARG C   6     9608   9694   9587   -537   3681    499       C  
ATOM   1737  CG  ARG C   6      24.974 -10.376   6.025  1.00 81.66           C  
ANISOU 1737  CG  ARG C   6    10065  10201  10759   -445   3563    374       C  
ATOM   1738  CD  ARG C   6      23.915  -9.282   6.164  1.00 88.16           C  
ANISOU 1738  CD  ARG C   6    10659  11039  11801   -365   3735    152       C  
ATOM   1739  NE  ARG C   6      24.270  -8.307   7.194  1.00 93.35           N  
ANISOU 1739  NE  ARG C   6    11479  11858  12132   -304   3863    -53       N  
ATOM   1740  CZ  ARG C   6      24.263  -6.989   7.017  1.00 93.51           C  
ANISOU 1740  CZ  ARG C   6    11439  11830  12262   -174   3854   -309       C  
ATOM   1741  NH1 ARG C   6      23.924  -6.475   5.842  1.00 93.02           N1+
ANISOU 1741  NH1 ARG C   6    11157  11571  12617    -83   3716   -365       N1+
ATOM   1742  NH2 ARG C   6      24.602  -6.183   8.017  1.00 91.63           N  
ANISOU 1742  NH2 ARG C   6    11361  11735  11718   -140   3960   -500       N  
ATOM   1743  N   PRO C   7      28.003 -12.002   5.674  1.00 52.11           N  
ANISOU 1743  N   PRO C   7     6919   6411   6468   -485   3080    742       N  
ATOM   1744  CA  PRO C   7      29.347 -11.613   5.234  1.00 50.95           C  
ANISOU 1744  CA  PRO C   7     6939   6258   6163   -385   2791    663       C  
ATOM   1745  C   PRO C   7      29.573 -10.119   5.406  1.00 49.78           C  
ANISOU 1745  C   PRO C   7     6796   6199   5917   -286   2836    366       C  
ATOM   1746  O   PRO C   7      28.682  -9.304   5.162  1.00 51.58           O  
ANISOU 1746  O   PRO C   7     6817   6383   6399   -246   2996    197       O  
ATOM   1747  CB  PRO C   7      29.369 -12.014   3.755  1.00 50.17           C  
ANISOU 1747  CB  PRO C   7     6682   5943   6435   -354   2510    689       C  
ATOM   1748  CG  PRO C   7      28.285 -13.030   3.617  1.00 45.41           C  
ANISOU 1748  CG  PRO C   7     5920   5231   6104   -475   2639    864       C  
ATOM   1749  CD  PRO C   7      27.230 -12.623   4.587  1.00 49.87           C  
ANISOU 1749  CD  PRO C   7     6388   5921   6639   -531   3017    828       C  
ATOM   1750  N   MET C   8      30.783  -9.764   5.831  1.00 46.44           N  
ANISOU 1750  N   MET C   8     6602   5889   5152   -247   2685    302       N  
ATOM   1751  CA  MET C   8      31.157  -8.375   6.047  1.00 46.31           C  
ANISOU 1751  CA  MET C   8     6625   5941   5029   -174   2702     11       C  
ATOM   1752  C   MET C   8      32.557  -8.138   5.506  1.00 44.10           C  
ANISOU 1752  C   MET C   8     6460   5641   4654   -114   2348    -28       C  
ATOM   1753  O   MET C   8      33.423  -9.014   5.575  1.00 42.74           O  
ANISOU 1753  O   MET C   8     6425   5506   4307   -134   2152    156       O  
ATOM   1754  CB  MET C   8      31.102  -7.997   7.535  1.00 59.22           C  
ANISOU 1754  CB  MET C   8     8412   7808   6282   -222   2899    -88       C  
ATOM   1755  CG  MET C   8      29.704  -8.001   8.128  1.00 68.33           C  
ANISOU 1755  CG  MET C   8     9401   9006   7557   -262   3181   -102       C  
ATOM   1756  SD  MET C   8      29.678  -7.623   9.890  1.00 78.99           S  
ANISOU 1756  SD  MET C   8    10912  10662   8437   -311   3342   -208       S  
ATOM   1757  CE  MET C   8      30.586  -9.016  10.560  1.00 81.95           C  
ANISOU 1757  CE  MET C   8    11538  11201   8397   -413   3192    140       C  
ATOM   1758  N   PHE C   9      32.773  -6.941   4.964  1.00 41.10           N  
ANISOU 1758  N   PHE C   9     6008   5190   4417    -39   2274   -260       N  
ATOM   1759  CA  PHE C   9      34.086  -6.542   4.462  1.00 40.44           C  
ANISOU 1759  CA  PHE C   9     6009   5095   4262      3   1973   -322       C  
ATOM   1760  C   PHE C   9      34.861  -5.900   5.603  1.00 46.27           C  
ANISOU 1760  C   PHE C   9     6952   6017   4610    -27   1999   -484       C  
ATOM   1761  O   PHE C   9      34.560  -4.780   6.023  1.00 49.13           O  
ANISOU 1761  O   PHE C   9     7312   6390   4965    -17   2161   -740       O  
ATOM   1762  CB  PHE C   9      33.950  -5.592   3.277  1.00 36.61           C  
ANISOU 1762  CB  PHE C   9     5352   4432   4128     78   1873   -455       C  
ATOM   1763  CG  PHE C   9      33.571  -6.277   1.997  1.00 40.01           C  
ANISOU 1763  CG  PHE C   9     5620   4716   4868     97   1733   -293       C  
ATOM   1764  CD1 PHE C   9      34.458  -7.141   1.371  1.00 33.89           C  
ANISOU 1764  CD1 PHE C   9     4901   3929   4047     93   1485   -148       C  
ATOM   1765  CD2 PHE C   9      32.325  -6.067   1.425  1.00 40.96           C  
ANISOU 1765  CD2 PHE C   9     5521   4715   5327    121   1845   -299       C  
ATOM   1766  CE1 PHE C   9      34.117  -7.777   0.197  1.00 34.72           C  
ANISOU 1766  CE1 PHE C   9     4875   3909   4408    100   1362    -38       C  
ATOM   1767  CE2 PHE C   9      31.975  -6.706   0.246  1.00 41.14           C  
ANISOU 1767  CE2 PHE C   9     5401   4625   5604    120   1690   -167       C  
ATOM   1768  CZ  PHE C   9      32.874  -7.564  -0.368  1.00 38.30           C  
ANISOU 1768  CZ  PHE C   9     5128   4260   5164    104   1453    -48       C  
ATOM   1769  N   LYS C  10      35.854  -6.621   6.126  1.00 44.87           N  
ANISOU 1769  N   LYS C  10     6950   5984   4116    -64   1833   -343       N  
ATOM   1770  CA  LYS C  10      36.771  -6.022   7.087  1.00 48.04           C  
ANISOU 1770  CA  LYS C  10     7539   6577   4139   -102   1771   -495       C  
ATOM   1771  C   LYS C  10      37.812  -5.154   6.401  1.00 43.12           C  
ANISOU 1771  C   LYS C  10     6881   5884   3620    -67   1522   -660       C  
ATOM   1772  O   LYS C  10      38.414  -4.294   7.054  1.00 43.67           O  
ANISOU 1772  O   LYS C  10     7057   6062   3472   -107   1492   -878       O  
ATOM   1773  CB  LYS C  10      37.446  -7.109   7.931  1.00 55.27           C  
ANISOU 1773  CB  LYS C  10     8638   7684   4679   -151   1657   -253       C  
ATOM   1774  CG  LYS C  10      36.459  -7.921   8.764  1.00 66.48           C  
ANISOU 1774  CG  LYS C  10    10107   9192   5959   -213   1913    -70       C  
ATOM   1775  CD  LYS C  10      37.109  -8.549   9.989  1.00 75.09           C  
ANISOU 1775  CD  LYS C  10    11357  10537   6636   -264   1788    103       C  
ATOM   1776  CE  LYS C  10      37.897  -9.798   9.623  1.00 77.99           C  
ANISOU 1776  CE  LYS C  10    11798  10849   6985   -240   1548    435       C  
ATOM   1777  NZ  LYS C  10      37.877 -10.798  10.732  1.00 84.71           N1+
ANISOU 1777  NZ  LYS C  10    12741  11876   7570   -296   1541    724       N1+
ATOM   1778  N   ARG C  11      38.023  -5.361   5.101  1.00 39.27           N  
ANISOU 1778  N   ARG C  11     6247   5222   3451     -8   1352   -566       N  
ATOM   1779  CA  ARG C  11      38.856  -4.498   4.273  1.00 40.98           C  
ANISOU 1779  CA  ARG C  11     6398   5349   3825     18   1159   -699       C  
ATOM   1780  C   ARG C  11      38.218  -4.439   2.894  1.00 40.73           C  
ANISOU 1780  C   ARG C  11     6176   5102   4197     77   1154   -644       C  
ATOM   1781  O   ARG C  11      38.023  -5.480   2.261  1.00 33.32           O  
ANISOU 1781  O   ARG C  11     5177   4114   3370    100   1091   -443       O  
ATOM   1782  CB  ARG C  11      40.287  -5.025   4.188  1.00 40.22           C  
ANISOU 1782  CB  ARG C  11     6359   5351   3572     13    872   -593       C  
ATOM   1783  CG  ARG C  11      41.173  -4.243   3.251  1.00 47.39           C  
ANISOU 1783  CG  ARG C  11     7176   6173   4659     24    690   -698       C  
ATOM   1784  CD  ARG C  11      42.630  -4.582   3.482  1.00 56.54           C  
ANISOU 1784  CD  ARG C  11     8381   7475   5628      8    438   -647       C  
ATOM   1785  NE  ARG C  11      43.500  -3.893   2.535  1.00 63.47           N  
ANISOU 1785  NE  ARG C  11     9148   8276   6691      4    285   -728       N  
ATOM   1786  CZ  ARG C  11      44.822  -3.827   2.654  1.00 69.42           C  
ANISOU 1786  CZ  ARG C  11     9893   9142   7343    -25     75   -747       C  
ATOM   1787  NH1 ARG C  11      45.425  -4.404   3.686  1.00 74.17           N1+
ANISOU 1787  NH1 ARG C  11    10592   9938   7651    -40    -38   -685       N1+
ATOM   1788  NH2 ARG C  11      45.540  -3.179   1.746  1.00 65.31           N  
ANISOU 1788  NH2 ARG C  11     9255   8547   7013    -43    -26   -812       N  
ATOM   1789  N   LEU C  12      37.878  -3.237   2.443  1.00 38.78           N  
ANISOU 1789  N   LEU C  12     5840   4723   4170     99   1211   -820       N  
ATOM   1790  CA  LEU C  12      37.176  -3.037   1.185  1.00 35.85           C  
ANISOU 1790  CA  LEU C  12     5291   4165   4168    154   1199   -762       C  
ATOM   1791  C   LEU C  12      38.166  -2.893   0.034  1.00 33.74           C  
ANISOU 1791  C   LEU C  12     4983   3842   3997    162    951   -709       C  
ATOM   1792  O   LEU C  12      39.358  -2.650   0.235  1.00 31.62           O  
ANISOU 1792  O   LEU C  12     4794   3651   3570    127    817   -765       O  
ATOM   1793  CB  LEU C  12      36.287  -1.791   1.261  1.00 37.79           C  
ANISOU 1793  CB  LEU C  12     5450   4276   4633    190   1381   -948       C  
ATOM   1794  CG  LEU C  12      35.117  -1.760   2.251  1.00 35.85           C  
ANISOU 1794  CG  LEU C  12     5192   4064   4366    197   1685  -1036       C  
ATOM   1795  CD1 LEU C  12      34.809  -0.330   2.643  1.00 38.37           C  
ANISOU 1795  CD1 LEU C  12     5495   4276   4809    230   1841  -1310       C  
ATOM   1796  CD2 LEU C  12      33.889  -2.412   1.642  1.00 33.11           C  
ANISOU 1796  CD2 LEU C  12     4660   3636   4286    235   1768   -874       C  
ATOM   1797  N   LEU C  13      37.656  -3.046  -1.186  1.00 37.16           N  
ANISOU 1797  N   LEU C  13     5280   4154   4686    199    893   -601       N  
ATOM   1798  CA  LEU C  13      38.461  -2.748  -2.362  1.00 28.36           C  
ANISOU 1798  CA  LEU C  13     4120   2989   3665    200    699   -560       C  
ATOM   1799  C   LEU C  13      38.783  -1.259  -2.389  1.00 29.21           C  
ANISOU 1799  C   LEU C  13     4224   3005   3869    187    704   -709       C  
ATOM   1800  O   LEU C  13      37.940  -0.425  -2.058  1.00 31.68           O  
ANISOU 1800  O   LEU C  13     4498   3209   4331    215    849   -815       O  
ATOM   1801  CB  LEU C  13      37.713  -3.137  -3.639  1.00 28.70           C  
ANISOU 1801  CB  LEU C  13     4032   2941   3932    231    642   -425       C  
ATOM   1802  CG  LEU C  13      37.576  -4.607  -4.048  1.00 32.53           C  
ANISOU 1802  CG  LEU C  13     4507   3471   4383    228    580   -284       C  
ATOM   1803  CD1 LEU C  13      36.613  -4.709  -5.212  1.00 28.67           C  
ANISOU 1803  CD1 LEU C  13     3878   2889   4127    241    534   -205       C  
ATOM   1804  CD2 LEU C  13      38.920  -5.196  -4.426  1.00 29.99           C  
ANISOU 1804  CD2 LEU C  13     4252   3230   3912    219    422   -246       C  
ATOM   1805  N   ALA C  14      40.011  -0.927  -2.775  1.00 30.32           N  
ANISOU 1805  N   ALA C  14     4394   3176   3951    144    555   -722       N  
ATOM   1806  CA  ALA C  14      40.438   0.453  -2.914  1.00 31.71           C  
ANISOU 1806  CA  ALA C  14     4564   3239   4246    107    539   -842       C  
ATOM   1807  C   ALA C  14      40.801   0.725  -4.368  1.00 28.79           C  
ANISOU 1807  C   ALA C  14     4109   2795   4036     99    408   -706       C  
ATOM   1808  O   ALA C  14      41.300  -0.157  -5.074  1.00 23.67           O  
ANISOU 1808  O   ALA C  14     3441   2245   3305     97    301   -580       O  
ATOM   1809  CB  ALA C  14      41.632   0.767  -2.005  1.00 30.42           C  
ANISOU 1809  CB  ALA C  14     4502   3185   3872     27    484   -991       C  
ATOM   1810  N   ASN C  15      40.528   1.949  -4.814  1.00 24.66           N  
ANISOU 1810  N   ASN C  15     3539   2089   3743     96    427   -731       N  
ATOM   1811  CA  ASN C  15      40.899   2.345  -6.167  1.00 24.37           C  
ANISOU 1811  CA  ASN C  15     3440   1987   3833     70    310   -580       C  
ATOM   1812  C   ASN C  15      42.398   2.202  -6.358  1.00 29.93           C  
ANISOU 1812  C   ASN C  15     4174   2818   4378    -20    204   -580       C  
ATOM   1813  O   ASN C  15      43.187   2.410  -5.431  1.00 30.39           O  
ANISOU 1813  O   ASN C  15     4289   2936   4323    -78    204   -729       O  
ATOM   1814  CB  ASN C  15      40.482   3.785  -6.442  1.00 22.75           C  
ANISOU 1814  CB  ASN C  15     3195   1539   3910     74    345   -596       C  
ATOM   1815  CG  ASN C  15      38.989   3.952  -6.488  1.00 30.76           C  
ANISOU 1815  CG  ASN C  15     4127   2418   5142    183    431   -562       C  
ATOM   1816  ND2 ASN C  15      38.504   5.060  -5.940  1.00 32.54           N  
ANISOU 1816  ND2 ASN C  15     4340   2437   5589    219    542   -695       N  
ATOM   1817  OD1 ASN C  15      38.270   3.086  -6.990  1.00 32.14           O  
ANISOU 1817  OD1 ASN C  15     4238   2668   5307    235    401   -432       O  
ATOM   1818  N   ALA C  16      42.791   1.838  -7.571  1.00 24.49           N  
ANISOU 1818  N   ALA C  16     3439   2188   3679    -36    113   -419       N  
ATOM   1819  CA  ALA C  16      44.183   1.577  -7.857  1.00 21.91           C  
ANISOU 1819  CA  ALA C  16     3104   1999   3221   -109     36   -411       C  
ATOM   1820  C   ALA C  16      44.539   2.138  -9.222  1.00 29.35           C  
ANISOU 1820  C   ALA C  16     3995   2904   4253   -168    -10   -262       C  
ATOM   1821  O   ALA C  16      43.681   2.391 -10.072  1.00 26.39           O  
ANISOU 1821  O   ALA C  16     3600   2439   3987   -137    -18   -128       O  
ATOM   1822  CB  ALA C  16      44.502   0.074  -7.808  1.00 23.18           C  
ANISOU 1822  CB  ALA C  16     3270   2346   3192    -58     -2   -385       C  
ATOM   1823  N   GLU C  17      45.835   2.296  -9.419  1.00 25.87           N  
ANISOU 1823  N   GLU C  17     3524   2553   3753   -258    -44   -273       N  
ATOM   1824  CA  GLU C  17      46.401   2.770 -10.664  1.00 24.47           C  
ANISOU 1824  CA  GLU C  17     3299   2384   3616   -341    -62   -127       C  
ATOM   1825  C   GLU C  17      47.693   2.007 -10.876  1.00 25.26           C  
ANISOU 1825  C   GLU C  17     3340   2696   3563   -377    -82   -150       C  
ATOM   1826  O   GLU C  17      48.402   1.709  -9.914  1.00 22.58           O  
ANISOU 1826  O   GLU C  17     2981   2436   3163   -381   -105   -284       O  
ATOM   1827  CB  GLU C  17      46.647   4.281 -10.590  1.00 26.21           C  
ANISOU 1827  CB  GLU C  17     3515   2409   4035   -449    -44   -127       C  
ATOM   1828  CG  GLU C  17      47.561   4.836 -11.621  1.00 41.57           C  
ANISOU 1828  CG  GLU C  17     5406   4378   6009   -577    -47     14       C  
ATOM   1829  CD  GLU C  17      49.014   4.682 -11.248  1.00 43.01           C  
ANISOU 1829  CD  GLU C  17     5514   4708   6118   -676    -52    -93       C  
ATOM   1830  OE1 GLU C  17      49.373   4.958 -10.083  1.00 44.01           O  
ANISOU 1830  OE1 GLU C  17     5644   4801   6279   -708    -73   -279       O  
ATOM   1831  OE2 GLU C  17      49.791   4.255 -12.122  1.00 42.09           O1-
ANISOU 1831  OE2 GLU C  17     5330   4760   5904   -720    -36      1       O1-
ATOM   1832  N  ACYS C  18      47.989   1.672 -12.126  0.74 26.07           N  
ANISOU 1832  N  ACYS C  18     3407   2903   3596   -397    -74    -23       N  
ATOM   1833  N  BCYS C  18      48.015   1.725 -12.139  0.26 26.23           N  
ANISOU 1833  N  BCYS C  18     3426   2920   3621   -403    -73    -21       N  
ATOM   1834  CA ACYS C  18      49.290   1.105 -12.419  0.74 25.98           C  
ANISOU 1834  CA ACYS C  18     3309   3080   3483   -433    -60    -53       C  
ATOM   1835  CA BCYS C  18      49.203   0.958 -12.484  0.26 26.12           C  
ANISOU 1835  CA BCYS C  18     3332   3108   3485   -418    -60    -49       C  
ATOM   1836  C  ACYS C  18      49.699   1.491 -13.829  0.74 28.40           C  
ANISOU 1836  C  ACYS C  18     3580   3451   3761   -526     -8     98       C  
ATOM   1837  C  BCYS C  18      49.679   1.362 -13.875  0.26 26.59           C  
ANISOU 1837  C  BCYS C  18     3351   3235   3515   -515     -8     96       C  
ATOM   1838  O  ACYS C  18      48.874   1.865 -14.667  0.74 25.87           O  
ANISOU 1838  O  ACYS C  18     3322   3064   3445   -536    -11    243       O  
ATOM   1839  O  BCYS C  18      48.861   1.638 -14.757  0.26 26.60           O  
ANISOU 1839  O  BCYS C  18     3414   3186   3505   -521    -11    238       O  
ATOM   1840  CB ACYS C  18      49.300  -0.416 -12.238  0.74 26.08           C  
ANISOU 1840  CB ACYS C  18     3320   3228   3363   -305    -76   -123       C  
ATOM   1841  CB BCYS C  18      48.899  -0.546 -12.417  0.26 25.73           C  
ANISOU 1841  CB BCYS C  18     3303   3166   3309   -283    -76   -100       C  
ATOM   1842  SG ACYS C  18      48.417  -1.334 -13.505  0.74 24.71           S  
ANISOU 1842  SG ACYS C  18     3200   3105   3084   -235    -63    -37       S  
ATOM   1843  SG BCYS C  18      50.203  -1.666 -12.974  0.26 27.25           S  
ANISOU 1843  SG BCYS C  18     3387   3576   3389   -252    -44   -148       S  
ATOM   1844  N   GLN C  19      51.000   1.419 -14.061  1.00 22.31           N  
ANISOU 1844  N   GLN C  19     2698   2821   2960   -599     38     72       N  
ATOM   1845  CA  GLN C  19      51.560   1.640 -15.384  1.00 23.88           C  
ANISOU 1845  CA  GLN C  19     2850   3133   3089   -697    126    204       C  
ATOM   1846  C   GLN C  19      51.411   0.367 -16.200  1.00 25.20           C  
ANISOU 1846  C   GLN C  19     3037   3474   3064   -597    161    184       C  
ATOM   1847  O   GLN C  19      51.553  -0.739 -15.671  1.00 20.88           O  
ANISOU 1847  O   GLN C  19     2464   2990   2480   -475    140     43       O  
ATOM   1848  CB  GLN C  19      53.033   2.029 -15.274  1.00 24.40           C  
ANISOU 1848  CB  GLN C  19     2757   3292   3222   -819    187    165       C  
ATOM   1849  CG  GLN C  19      53.777   2.203 -16.593  1.00 29.09           C  
ANISOU 1849  CG  GLN C  19     3280   4042   3732   -934    322    292       C  
ATOM   1850  CD  GLN C  19      55.273   2.423 -16.372  1.00 37.18           C  
ANISOU 1850  CD  GLN C  19     4097   5177   4852  -1044    391    228       C  
ATOM   1851  NE2 GLN C  19      55.980   2.829 -17.418  1.00 34.70           N  
ANISOU 1851  NE2 GLN C  19     3703   4980   4501  -1186    537    353       N  
ATOM   1852  OE1 GLN C  19      55.776   2.237 -15.267  1.00 42.67           O  
ANISOU 1852  OE1 GLN C  19     4700   5864   5649  -1010    308     76       O  
ATOM   1853  N   GLU C  20      51.119   0.516 -17.488  1.00 22.82           N  
ANISOU 1853  N   GLU C  20     2790   3244   2637   -652    209    325       N  
ATOM   1854  CA  GLU C  20      50.942  -0.670 -18.314  1.00 25.85           C  
ANISOU 1854  CA  GLU C  20     3209   3792   2822   -574    242    269       C  
ATOM   1855  C   GLU C  20      52.245  -1.465 -18.379  1.00 28.93           C  
ANISOU 1855  C   GLU C  20     3463   4362   3168   -546    356    124       C  
ATOM   1856  O   GLU C  20      53.344  -0.903 -18.397  1.00 24.76           O  
ANISOU 1856  O   GLU C  20     2807   3901   2701   -646    442    143       O  
ATOM   1857  CB  GLU C  20      50.448  -0.287 -19.707  1.00 26.49           C  
ANISOU 1857  CB  GLU C  20     3382   3952   2732   -661    262    448       C  
ATOM   1858  CG  GLU C  20      51.473   0.242 -20.655  1.00 42.47           C  
ANISOU 1858  CG  GLU C  20     5350   6139   4649   -808    408    553       C  
ATOM   1859  CD  GLU C  20      50.906   0.383 -22.054  1.00 55.68           C  
ANISOU 1859  CD  GLU C  20     7145   7936   6075   -881    412    727       C  
ATOM   1860  OE1 GLU C  20      50.717  -0.653 -22.726  1.00 60.52           O  
ANISOU 1860  OE1 GLU C  20     7809   8716   6469   -823    434    613       O  
ATOM   1861  OE2 GLU C  20      50.636   1.528 -22.477  1.00 61.60           O1-
ANISOU 1861  OE2 GLU C  20     7945   8609   6851   -997    383    978       O1-
ATOM   1862  N   GLY C  21      52.115  -2.791 -18.371  1.00 24.21           N  
ANISOU 1862  N   GLY C  21     2877   3822   2501   -408    353    -27       N  
ATOM   1863  CA  GLY C  21      53.262  -3.662 -18.260  1.00 23.46           C  
ANISOU 1863  CA  GLY C  21     2637   3851   2425   -332    443   -181       C  
ATOM   1864  C   GLY C  21      53.684  -3.959 -16.838  1.00 29.71           C  
ANISOU 1864  C   GLY C  21     3337   4557   3394   -239    353   -267       C  
ATOM   1865  O   GLY C  21      54.515  -4.850 -16.628  1.00 29.89           O  
ANISOU 1865  O   GLY C  21     3237   4656   3466   -135    388   -386       O  
ATOM   1866  N   GLN C  22      53.152  -3.240 -15.854  1.00 25.22           N  
ANISOU 1866  N   GLN C  22     2824   3839   2921   -269    236   -211       N  
ATOM   1867  CA  GLN C  22      53.456  -3.528 -14.462  1.00 20.76           C  
ANISOU 1867  CA  GLN C  22     2205   3217   2466   -191    134   -288       C  
ATOM   1868  C   GLN C  22      52.306  -4.324 -13.864  1.00 25.05           C  
ANISOU 1868  C   GLN C  22     2888   3642   2987    -69     49   -311       C  
ATOM   1869  O   GLN C  22      51.336  -4.670 -14.542  1.00 23.94           O  
ANISOU 1869  O   GLN C  22     2860   3463   2775    -47     63   -285       O  
ATOM   1870  CB  GLN C  22      53.721  -2.247 -13.668  1.00 21.08           C  
ANISOU 1870  CB  GLN C  22     2213   3185   2610   -317     76   -254       C  
ATOM   1871  CG  GLN C  22      54.931  -1.450 -14.136  1.00 25.60           C  
ANISOU 1871  CG  GLN C  22     2621   3858   3247   -464    156   -227       C  
ATOM   1872  CD  GLN C  22      56.254  -2.108 -13.796  1.00 27.99           C  
ANISOU 1872  CD  GLN C  22     2710   4311   3613   -409    158   -325       C  
ATOM   1873  NE2 GLN C  22      57.296  -1.750 -14.539  1.00 26.09           N  
ANISOU 1873  NE2 GLN C  22     2297   4203   3414   -513    281   -306       N  
ATOM   1874  OE1 GLN C  22      56.342  -2.924 -12.876  1.00 25.24           O  
ANISOU 1874  OE1 GLN C  22     2342   3963   3285   -275     50   -401       O  
ATOM   1875  N   SER C  23      52.420  -4.617 -12.575  1.00 30.15           N  
ANISOU 1875  N   SER C  23     3524   4243   3689     -1    -46   -353       N  
ATOM   1876  CA  SER C  23      51.444  -5.431 -11.875  1.00 31.83           C  
ANISOU 1876  CA  SER C  23     3854   4353   3885    105   -108   -359       C  
ATOM   1877  C   SER C  23      50.626  -4.580 -10.917  1.00 26.71           C  
ANISOU 1877  C   SER C  23     3304   3595   3250     51   -160   -332       C  
ATOM   1878  O   SER C  23      51.072  -3.528 -10.449  1.00 30.93           O  
ANISOU 1878  O   SER C  23     3803   4129   3821    -45   -182   -345       O  
ATOM   1879  CB  SER C  23      52.127  -6.567 -11.110  1.00 29.46           C  
ANISOU 1879  CB  SER C  23     3488   4089   3616    238   -168   -404       C  
ATOM   1880  OG  SER C  23      52.808  -7.412 -12.016  1.00 38.02           O  
ANISOU 1880  OG  SER C  23     4478   5246   4723    312    -97   -457       O  
ATOM   1881  N   VAL C  24      49.416  -5.054 -10.633  1.00 21.80           N  
ANISOU 1881  N   VAL C  24     2798   2874   2613    108   -169   -310       N  
ATOM   1882  CA  VAL C  24      48.545  -4.416  -9.662  1.00 23.11           C  
ANISOU 1882  CA  VAL C  24     3049   2938   2792     81   -185   -306       C  
ATOM   1883  C   VAL C  24      47.808  -5.504  -8.898  1.00 25.04           C  
ANISOU 1883  C   VAL C  24     3371   3139   3005    177   -199   -297       C  
ATOM   1884  O   VAL C  24      47.547  -6.595  -9.416  1.00 24.15           O  
ANISOU 1884  O   VAL C  24     3266   3013   2897    246   -192   -278       O  
ATOM   1885  CB  VAL C  24      47.562  -3.419 -10.323  1.00 22.86           C  
ANISOU 1885  CB  VAL C  24     3061   2803   2821     13   -144   -254       C  
ATOM   1886  CG1 VAL C  24      46.405  -4.145 -10.980  1.00 21.13           C  
ANISOU 1886  CG1 VAL C  24     2890   2535   2602     65   -133   -204       C  
ATOM   1887  CG2 VAL C  24      47.066  -2.408  -9.301  1.00 29.77           C  
ANISOU 1887  CG2 VAL C  24     3984   3575   3752    -28   -136   -292       C  
ATOM   1888  N   CYS C  25      47.482  -5.196  -7.649  1.00 28.06           N  
ANISOU 1888  N   CYS C  25     3814   3495   3352    169   -210   -317       N  
ATOM   1889  CA  CYS C  25      46.879  -6.148  -6.732  1.00 26.12           C  
ANISOU 1889  CA  CYS C  25     3647   3226   3053    239   -210   -283       C  
ATOM   1890  C   CYS C  25      45.720  -5.477  -6.008  1.00 28.97           C  
ANISOU 1890  C   CYS C  25     4088   3509   3411    201   -136   -302       C  
ATOM   1891  O   CYS C  25      45.895  -4.405  -5.424  1.00 25.10           O  
ANISOU 1891  O   CYS C  25     3613   3025   2898    139   -128   -380       O  
ATOM   1892  CB  CYS C  25      47.920  -6.642  -5.727  1.00 26.99           C  
ANISOU 1892  CB  CYS C  25     3746   3441   3068    279   -301   -281       C  
ATOM   1893  SG  CYS C  25      47.261  -7.736  -4.466  1.00 45.92           S  
ANISOU 1893  SG  CYS C  25     6262   5820   5364    346   -304   -190       S  
ATOM   1894  N   PHE C  26      44.546  -6.097  -6.050  1.00 28.88           N  
ANISOU 1894  N   PHE C  26     4115   3418   3441    234    -74   -249       N  
ATOM   1895  CA  PHE C  26      43.404  -5.674  -5.244  1.00 29.95           C  
ANISOU 1895  CA  PHE C  26     4304   3492   3582    216     26   -266       C  
ATOM   1896  C   PHE C  26      43.252  -6.621  -4.061  1.00 28.83           C  
ANISOU 1896  C   PHE C  26     4244   3395   3315    246     51   -215       C  
ATOM   1897  O   PHE C  26      43.177  -7.835  -4.250  1.00 33.43           O  
ANISOU 1897  O   PHE C  26     4833   3957   3914    292     28   -122       O  
ATOM   1898  CB  PHE C  26      42.114  -5.675  -6.063  1.00 30.93           C  
ANISOU 1898  CB  PHE C  26     4385   3506   3862    218     84   -224       C  
ATOM   1899  CG  PHE C  26      41.987  -4.519  -7.007  1.00 34.69           C  
ANISOU 1899  CG  PHE C  26     4801   3927   4455    184     69   -241       C  
ATOM   1900  CD1 PHE C  26      41.597  -3.272  -6.554  1.00 35.81           C  
ANISOU 1900  CD1 PHE C  26     4942   3997   4669    160    133   -304       C  
ATOM   1901  CD2 PHE C  26      42.244  -4.686  -8.355  1.00 37.75           C  
ANISOU 1901  CD2 PHE C  26     5140   4327   4878    176     -5   -191       C  
ATOM   1902  CE1 PHE C  26      41.472  -2.212  -7.436  1.00 39.25           C  
ANISOU 1902  CE1 PHE C  26     5324   4349   5243    134    109   -283       C  
ATOM   1903  CE2 PHE C  26      42.120  -3.633  -9.236  1.00 41.40           C  
ANISOU 1903  CE2 PHE C  26     5558   4744   5427    137    -27   -161       C  
ATOM   1904  CZ  PHE C  26      41.738  -2.396  -8.778  1.00 43.58           C  
ANISOU 1904  CZ  PHE C  26     5829   4923   5806    120     23   -190       C  
ATOM   1905  N   GLU C  27      43.190  -6.071  -2.852  1.00 25.43           N  
ANISOU 1905  N   GLU C  27     3887   3021   2755    215    103   -276       N  
ATOM   1906  CA  GLU C  27      43.095  -6.864  -1.631  1.00 30.65           C  
ANISOU 1906  CA  GLU C  27     4649   3759   3239    227    129   -207       C  
ATOM   1907  C   GLU C  27      41.783  -6.586  -0.908  1.00 36.45           C  
ANISOU 1907  C   GLU C  27     5433   4459   3956    197    317   -234       C  
ATOM   1908  O   GLU C  27      41.337  -5.434  -0.834  1.00 37.97           O  
ANISOU 1908  O   GLU C  27     5608   4613   4204    166    407   -370       O  
ATOM   1909  CB  GLU C  27      44.257  -6.560  -0.678  1.00 42.31           C  
ANISOU 1909  CB  GLU C  27     6183   5390   4503    203     20   -258       C  
ATOM   1910  CG  GLU C  27      45.625  -6.975  -1.177  1.00 58.36           C  
ANISOU 1910  CG  GLU C  27     8139   7481   6553    243   -161   -217       C  
ATOM   1911  CD  GLU C  27      46.701  -6.803  -0.115  1.00 67.74           C  
ANISOU 1911  CD  GLU C  27     9366   8841   7532    218   -299   -245       C  
ATOM   1912  OE1 GLU C  27      46.435  -6.112   0.891  1.00 72.16           O  
ANISOU 1912  OE1 GLU C  27    10023   9474   7919    148   -253   -343       O  
ATOM   1913  OE2 GLU C  27      47.807  -7.362  -0.281  1.00 70.21           O1-
ANISOU 1913  OE2 GLU C  27     9602   9220   7854    270   -455   -179       O1-
ATOM   1914  N   ILE C  28      41.174  -7.644  -0.360  1.00 25.40           N  
ANISOU 1914  N   ILE C  28     4087   3063   2500    207    389   -101       N  
ATOM   1915  CA  ILE C  28      40.016  -7.519   0.520  1.00 31.13           C  
ANISOU 1915  CA  ILE C  28     4860   3798   3172    170    596   -111       C  
ATOM   1916  C   ILE C  28      40.135  -8.517   1.663  1.00 35.23           C  
ANISOU 1916  C   ILE C  28     5509   4425   3454    156    618     40       C  
ATOM   1917  O   ILE C  28      40.886  -9.494   1.598  1.00 34.45           O  
ANISOU 1917  O   ILE C  28     5439   4336   3313    193    470    188       O  
ATOM   1918  CB  ILE C  28      38.674  -7.761  -0.202  1.00 33.47           C  
ANISOU 1918  CB  ILE C  28     5040   3948   3727    172    718    -69       C  
ATOM   1919  CG1 ILE C  28      38.699  -9.125  -0.895  1.00 39.59           C  
ANISOU 1919  CG1 ILE C  28     5786   4645   4613    191    625     95       C  
ATOM   1920  CG2 ILE C  28      38.368  -6.636  -1.172  1.00 33.65           C  
ANISOU 1920  CG2 ILE C  28     4944   3876   3966    186    709   -194       C  
ATOM   1921  CD1 ILE C  28      37.382  -9.525  -1.515  1.00 46.38           C  
ANISOU 1921  CD1 ILE C  28     6531   5378   5714    167    719    141       C  
ATOM   1922  N  AARG C  29      39.381  -8.249   2.726  0.61 36.03           N  
ANISOU 1922  N  AARG C  29     5688   4604   3399    106    814      8       N  
ATOM   1923  N  BARG C  29      39.359  -8.269   2.716  0.39 36.21           N  
ANISOU 1923  N  BARG C  29     5710   4624   3426    106    816     11       N  
ATOM   1924  CA AARG C  29      39.225  -9.176   3.841  0.61 38.79           C  
ANISOU 1924  CA AARG C  29     6171   5060   3508     71    885    185       C  
ATOM   1925  CA BARG C  29      39.233  -9.194   3.836  0.39 38.68           C  
ANISOU 1925  CA BARG C  29     6157   5046   3494     72    882    189       C  
ATOM   1926  C  AARG C  29      37.736  -9.350   4.091  0.61 39.24           C  
ANISOU 1926  C  AARG C  29     6186   5062   3661     25   1163    219       C  
ATOM   1927  C  BARG C  29      37.756  -9.364   4.149  0.39 39.38           C  
ANISOU 1927  C  BARG C  29     6212   5089   3663     24   1164    223       C  
ATOM   1928  O  AARG C  29      37.030  -8.368   4.344  0.61 40.71           O  
ANISOU 1928  O  AARG C  29     6334   5265   3868      5   1350     35       O  
ATOM   1929  O  BARG C  29      37.082  -8.395   4.515  0.39 41.30           O  
ANISOU 1929  O  BARG C  29     6434   5365   3894     -1   1356     41       O  
ATOM   1930  CB AARG C  29      39.935  -8.667   5.100  0.61 41.36           C  
ANISOU 1930  CB AARG C  29     6658   5611   3446     31    855    109       C  
ATOM   1931  CB BARG C  29      40.002  -8.695   5.062  0.39 41.11           C  
ANISOU 1931  CB BARG C  29     6625   5577   3418     34    838    115       C  
ATOM   1932  CG AARG C  29      41.459  -8.662   5.005  0.61 40.07           C  
ANISOU 1932  CG AARG C  29     6516   5529   3180     65    559    113       C  
ATOM   1933  CG BARG C  29      41.509  -8.650   4.856  0.39 39.65           C  
ANISOU 1933  CG BARG C  29     6446   5459   3162     72    543    109       C  
ATOM   1934  CD AARG C  29      42.099  -8.356   6.355  0.61 41.84           C  
ANISOU 1934  CD AARG C  29     6907   6002   2987      7    499     72       C  
ATOM   1935  CD BARG C  29      42.255  -8.449   6.163  0.39 41.07           C  
ANISOU 1935  CD BARG C  29     6787   5883   2933     22    456     91       C  
ATOM   1936  NE AARG C  29      41.892  -9.436   7.317  0.61 42.57           N  
ANISOU 1936  NE AARG C  29     7142   6207   2827    -12    533    335       N  
ATOM   1937  NE BARG C  29      43.695  -8.338   5.953  0.39 39.61           N  
ANISOU 1937  NE BARG C  29     6563   5767   2718     54    163     73       N  
ATOM   1938  CZ AARG C  29      41.813  -9.267   8.631  0.61 48.10           C  
ANISOU 1938  CZ AARG C  29     8021   7135   3121    -91    608    328       C  
ATOM   1939  CZ BARG C  29      44.530  -9.371   5.917  0.39 38.92           C  
ANISOU 1939  CZ BARG C  29     6466   5702   2619    122    -46    300       C  
ATOM   1940  NH1AARG C  29      41.920  -8.054   9.155  0.61 52.28           N1+
ANISOU 1940  NH1AARG C  29     8597   7797   3472   -154    656     29       N1+
ATOM   1941  NH1BARG C  29      44.073 -10.605   6.080  0.39 40.46           N1+
ANISOU 1941  NH1BARG C  29     6711   5833   2830    160     -1    570       N1+
ATOM   1942  NH2AARG C  29      41.623 -10.313   9.424  0.61 49.34           N  
ANISOU 1942  NH2AARG C  29     8296   7384   3067   -112    632    618       N  
ATOM   1943  NH2BARG C  29      45.825  -9.170   5.722  0.39 38.55           N  
ANISOU 1943  NH2BARG C  29     6344   5727   2575    152   -297    260       N  
ATOM   1944  N   VAL C  30      37.255 -10.587   3.999  1.00 35.21           N  
ANISOU 1944  N   VAL C  30     5664   4468   3245      9   1197    447       N  
ATOM   1945  CA  VAL C  30      35.835 -10.888   4.139  1.00 42.31           C  
ANISOU 1945  CA  VAL C  30     6484   5302   4289    -51   1454    505       C  
ATOM   1946  C   VAL C  30      35.662 -11.940   5.224  1.00 47.10           C  
ANISOU 1946  C   VAL C  30     7234   5990   4673   -121   1561    756       C  
ATOM   1947  O   VAL C  30      36.264 -13.016   5.154  1.00 51.11           O  
ANISOU 1947  O   VAL C  30     7809   6438   5172   -105   1399    973       O  
ATOM   1948  CB  VAL C  30      35.220 -11.376   2.820  1.00 45.24           C  
ANISOU 1948  CB  VAL C  30     6670   5457   5061    -39   1401    542       C  
ATOM   1949  CG1 VAL C  30      33.715 -11.190   2.856  1.00 57.90           C  
ANISOU 1949  CG1 VAL C  30     8125   7011   6864    -95   1660    512       C  
ATOM   1950  CG2 VAL C  30      35.832 -10.654   1.636  1.00 42.44           C  
ANISOU 1950  CG2 VAL C  30     6227   5036   4862     35   1200    381       C  
ATOM   1951  N   SER C  31      34.822 -11.640   6.208  1.00 44.79           N  
ANISOU 1951  N   SER C  31     6983   5823   4214   -195   1847    734       N  
ATOM   1952  CA  SER C  31      34.457 -12.573   7.260  1.00 50.35           C  
ANISOU 1952  CA  SER C  31     7818   6617   4697   -286   2008    992       C  
ATOM   1953  C   SER C  31      33.030 -13.057   7.045  1.00 56.96           C  
ANISOU 1953  C   SER C  31     8491   7326   5825   -365   2268   1078       C  
ATOM   1954  O   SER C  31      32.276 -12.508   6.238  1.00 58.15           O  
ANISOU 1954  O   SER C  31     8428   7362   6304   -343   2337    906       O  
ATOM   1955  CB  SER C  31      34.595 -11.922   8.641  1.00 54.96           C  
ANISOU 1955  CB  SER C  31     8581   7486   4817   -335   2159    906       C  
ATOM   1956  OG  SER C  31      33.698 -10.831   8.775  1.00 58.67           O  
ANISOU 1956  OG  SER C  31     8924   7999   5370   -344   2400    622       O  
ATOM   1957  N   GLY C  32      32.666 -14.093   7.777  1.00 55.61           N  
ANISOU 1957  N   GLY C  32     8399   7180   5552   -462   2383   1354       N  
ATOM   1958  CA  GLY C  32      31.327 -14.651   7.724  1.00 56.62           C  
ANISOU 1958  CA  GLY C  32     8344   7211   5959   -563   2592   1443       C  
ATOM   1959  C   GLY C  32      31.335 -16.133   8.050  1.00 60.56           C  
ANISOU 1959  C   GLY C  32     8905   7625   6478   -650   2514   1782       C  
ATOM   1960  O   GLY C  32      32.260 -16.875   7.736  1.00 62.81           O  
ANISOU 1960  O   GLY C  32     9300   7793   6772   -602   2266   1943       O  
ATOM   1961  N   ILE C  33      30.271 -16.578   8.710  1.00 62.92           N  
ANISOU 1961  N   ILE C  33     9123   7978   6804   -781   2729   1889       N  
ATOM   1962  CA  ILE C  33      30.057 -17.984   9.021  1.00 62.50           C  
ANISOU 1962  CA  ILE C  33     9105   7820   6822   -897   2691   2206       C  
ATOM   1963  C   ILE C  33      28.726 -18.399   8.404  1.00 61.91           C  
ANISOU 1963  C   ILE C  33     8780   7563   7179   -995   2841   2195       C  
ATOM   1964  O   ILE C  33      27.684 -17.839   8.756  1.00 63.16           O  
ANISOU 1964  O   ILE C  33     8788   7843   7366  -1051   3098   2076       O  
ATOM   1965  CB  ILE C  33      30.058 -18.262  10.534  1.00 68.87           C  
ANISOU 1965  CB  ILE C  33    10065   8893   7209  -1001   2795   2396       C  
ATOM   1966  CG1 ILE C  33      30.999 -17.302  11.265  1.00 72.40           C  
ANISOU 1966  CG1 ILE C  33    10679   9628   7200   -915   2731   2264       C  
ATOM   1967  CG2 ILE C  33      30.455 -19.706  10.802  1.00 73.07           C  
ANISOU 1967  CG2 ILE C  33    10722   9290   7750  -1082   2626   2755       C  
ATOM   1968  CD1 ILE C  33      30.963 -17.447  12.778  1.00 77.47           C  
ANISOU 1968  CD1 ILE C  33    11452  10591   7394  -1020   2835   2424       C  
ATOM   1969  N   PRO C  34      28.700 -19.374   7.478  1.00 64.59           N  
ANISOU 1969  N   PRO C  34     9053   7614   7875  -1018   2675   2295       N  
ATOM   1970  CA  PRO C  34      29.845 -20.113   6.930  1.00 64.23           C  
ANISOU 1970  CA  PRO C  34     9145   7380   7881   -938   2370   2405       C  
ATOM   1971  C   PRO C  34      30.724 -19.239   6.046  1.00 62.06           C  
ANISOU 1971  C   PRO C  34     8880   7085   7614   -769   2210   2192       C  
ATOM   1972  O   PRO C  34      30.261 -18.183   5.620  1.00 57.27           O  
ANISOU 1972  O   PRO C  34     8138   6540   7081   -737   2328   1961       O  
ATOM   1973  CB  PRO C  34      29.182 -21.227   6.104  1.00 68.00           C  
ANISOU 1973  CB  PRO C  34     9480   7559   8797  -1030   2303   2468       C  
ATOM   1974  CG  PRO C  34      27.769 -21.298   6.591  1.00 69.48           C  
ANISOU 1974  CG  PRO C  34     9507   7815   9076  -1192   2573   2494       C  
ATOM   1975  CD  PRO C  34      27.424 -19.891   6.959  1.00 68.66           C  
ANISOU 1975  CD  PRO C  34     9329   7969   8789  -1139   2781   2291       C  
ATOM   1976  N   PRO C  35      31.965 -19.656   5.802  1.00 62.36           N  
ANISOU 1976  N   PRO C  35     9066   7041   7586   -663   1950   2270       N  
ATOM   1977  CA  PRO C  35      32.855 -18.879   4.934  1.00 60.50           C  
ANISOU 1977  CA  PRO C  35     8843   6786   7357   -510   1793   2081       C  
ATOM   1978  C   PRO C  35      32.194 -18.605   3.596  1.00 56.57           C  
ANISOU 1978  C   PRO C  35     8120   6125   7250   -515   1777   1867       C  
ATOM   1979  O   PRO C  35      31.756 -19.536   2.903  1.00 55.34           O  
ANISOU 1979  O   PRO C  35     7867   5736   7423   -578   1716   1918       O  
ATOM   1980  CB  PRO C  35      34.080 -19.791   4.780  1.00 62.00           C  
ANISOU 1980  CB  PRO C  35     9162   6850   7545   -414   1504   2230       C  
ATOM   1981  CG  PRO C  35      34.092 -20.594   6.028  1.00 65.17           C  
ANISOU 1981  CG  PRO C  35     9692   7331   7737   -497   1524   2500       C  
ATOM   1982  CD  PRO C  35      32.645 -20.828   6.382  1.00 65.46           C  
ANISOU 1982  CD  PRO C  35     9619   7366   7886   -674   1785   2542       C  
ATOM   1983  N   PRO C  36      32.075 -17.340   3.212  1.00 54.02           N  
ANISOU 1983  N   PRO C  36     7691   5934   6899   -456   1785   1595       N  
ATOM   1984  CA  PRO C  36      31.308 -17.003   2.012  1.00 50.27           C  
ANISOU 1984  CA  PRO C  36     6981   5347   6773   -469   1751   1403       C  
ATOM   1985  C   PRO C  36      32.073 -17.321   0.738  1.00 49.22           C  
ANISOU 1985  C   PRO C  36     6833   5066   6804   -388   1451   1305       C  
ATOM   1986  O   PRO C  36      33.302 -17.394   0.709  1.00 45.33           O  
ANISOU 1986  O   PRO C  36     6480   4597   6149   -283   1274   1307       O  
ATOM   1987  CB  PRO C  36      31.079 -15.496   2.154  1.00 41.20           C  
ANISOU 1987  CB  PRO C  36     5758   4386   5509   -411   1851   1179       C  
ATOM   1988  CG  PRO C  36      32.257 -15.026   2.932  1.00 44.48           C  
ANISOU 1988  CG  PRO C  36     6390   4974   5536   -328   1788   1169       C  
ATOM   1989  CD  PRO C  36      32.595 -16.141   3.891  1.00 49.19           C  
ANISOU 1989  CD  PRO C  36     7173   5575   5943   -383   1823   1456       C  
ATOM   1990  N   THR C  37      31.306 -17.525  -0.327  1.00 47.61           N  
ANISOU 1990  N   THR C  37     6444   4721   6926   -444   1401   1211       N  
ATOM   1991  CA  THR C  37      31.860 -17.691  -1.658  1.00 43.54           C  
ANISOU 1991  CA  THR C  37     5895   4096   6551   -383   1144   1068       C  
ATOM   1992  C   THR C  37      31.903 -16.336  -2.349  1.00 48.83           C  
ANISOU 1992  C   THR C  37     6466   4900   7186   -306   1071    852       C  
ATOM   1993  O   THR C  37      31.023 -15.493  -2.143  1.00 51.49           O  
ANISOU 1993  O   THR C  37     6671   5323   7571   -331   1211    797       O  
ATOM   1994  CB  THR C  37      31.029 -18.684  -2.471  1.00 48.15           C  
ANISOU 1994  CB  THR C  37     6351   4462   7481   -505   1099   1073       C  
ATOM   1995  CG2 THR C  37      31.065 -20.065  -1.822  1.00 44.64           C  
ANISOU 1995  CG2 THR C  37     6018   3834   7109   -584   1162   1303       C  
ATOM   1996  OG1 THR C  37      29.670 -18.234  -2.532  1.00 60.74           O  
ANISOU 1996  OG1 THR C  37     7728   6092   9257   -607   1237   1036       O  
ATOM   1997  N   LEU C  38      32.937 -16.127  -3.160  1.00 46.27           N  
ANISOU 1997  N   LEU C  38     6200   4585   6796   -208    864    739       N  
ATOM   1998  CA  LEU C  38      33.182 -14.846  -3.802  1.00 40.85           C  
ANISOU 1998  CA  LEU C  38     5452   4016   6052   -135    782    571       C  
ATOM   1999  C   LEU C  38      32.915 -14.949  -5.297  1.00 39.68           C  
ANISOU 1999  C   LEU C  38     5188   3793   6095   -155    609    455       C  
ATOM   2000  O   LEU C  38      33.253 -15.951  -5.932  1.00 43.21           O  
ANISOU 2000  O   LEU C  38     5675   4124   6621   -174    492    444       O  
ATOM   2001  CB  LEU C  38      34.621 -14.378  -3.566  1.00 37.66           C  
ANISOU 2001  CB  LEU C  38     5195   3719   5395    -24    691    534       C  
ATOM   2002  CG  LEU C  38      34.840 -13.361  -2.445  1.00 39.09           C  
ANISOU 2002  CG  LEU C  38     5443   4061   5349      8    815    524       C  
ATOM   2003  CD1 LEU C  38      34.035 -13.737  -1.214  1.00 44.85           C  
ANISOU 2003  CD1 LEU C  38     6201   4811   6029    -66   1037    656       C  
ATOM   2004  CD2 LEU C  38      36.316 -13.242  -2.097  1.00 31.25           C  
ANISOU 2004  CD2 LEU C  38     4593   3159   4120     89    697    521       C  
ATOM   2005  N   LYS C  39      32.306 -13.909  -5.854  1.00 38.22           N  
ANISOU 2005  N   LYS C  39     4863   3674   5985   -150    590    367       N  
ATOM   2006  CA  LYS C  39      32.163 -13.773  -7.295  1.00 38.81           C  
ANISOU 2006  CA  LYS C  39     4847   3733   6166   -162    397    265       C  
ATOM   2007  C   LYS C  39      32.689 -12.402  -7.707  1.00 31.10           C  
ANISOU 2007  C   LYS C  39     3872   2874   5071    -74    331    193       C  
ATOM   2008  O   LYS C  39      32.359 -11.389  -7.080  1.00 34.23           O  
ANISOU 2008  O   LYS C  39     4220   3324   5461    -37    447    198       O  
ATOM   2009  CB  LYS C  39      30.696 -13.981  -7.724  1.00 48.04           C  
ANISOU 2009  CB  LYS C  39     5807   4841   7606   -267    396    273       C  
ATOM   2010  CG  LYS C  39      30.160 -12.959  -8.714  1.00 59.06           C  
ANISOU 2010  CG  LYS C  39     7046   6305   9087   -249    265    209       C  
ATOM   2011  CD  LYS C  39      28.645 -13.087  -8.875  1.00 65.41           C  
ANISOU 2011  CD  LYS C  39     7603   7067  10183   -343    280    239       C  
ATOM   2012  CE  LYS C  39      28.075 -11.939  -9.691  1.00 66.24           C  
ANISOU 2012  CE  LYS C  39     7536   7242  10389   -297    150    218       C  
ATOM   2013  NZ  LYS C  39      28.246 -12.159 -11.163  1.00 62.37           N1+
ANISOU 2013  NZ  LYS C  39     7050   6782   9864   -339   -135    157       N1+
ATOM   2014  N   TRP C  40      33.543 -12.388  -8.725  1.00 31.88           N  
ANISOU 2014  N   TRP C  40     4031   3004   5077    -44    165    122       N  
ATOM   2015  CA  TRP C  40      34.218 -11.187  -9.188  1.00 25.45           C  
ANISOU 2015  CA  TRP C  40     3238   2290   4143     23     98     77       C  
ATOM   2016  C   TRP C  40      33.657 -10.754 -10.534  1.00 25.54           C  
ANISOU 2016  C   TRP C  40     3139   2325   4239    -10    -59     50       C  
ATOM   2017  O   TRP C  40      33.382 -11.588 -11.401  1.00 29.37           O  
ANISOU 2017  O   TRP C  40     3603   2786   4772    -74   -175     11       O  
ATOM   2018  CB  TRP C  40      35.723 -11.424  -9.317  1.00 31.09           C  
ANISOU 2018  CB  TRP C  40     4096   3051   4664     77     45     35       C  
ATOM   2019  CG  TRP C  40      36.392 -11.849  -8.046  1.00 26.44           C  
ANISOU 2019  CG  TRP C  40     3615   2458   3972    116    148     83       C  
ATOM   2020  CD1 TRP C  40      36.374 -13.096  -7.479  1.00 34.09           C  
ANISOU 2020  CD1 TRP C  40     4640   3338   4973    101    190    146       C  
ATOM   2021  CD2 TRP C  40      37.190 -11.028  -7.183  1.00 23.58           C  
ANISOU 2021  CD2 TRP C  40     3322   2185   3453    169    203     83       C  
ATOM   2022  CE2 TRP C  40      37.622 -11.841  -6.115  1.00 35.66           C  
ANISOU 2022  CE2 TRP C  40     4949   3704   4895    187    259    156       C  
ATOM   2023  CE3 TRP C  40      37.573  -9.685  -7.205  1.00 26.40           C  
ANISOU 2023  CE3 TRP C  40     3669   2618   3743    193    199     30       C  
ATOM   2024  NE1 TRP C  40      37.112 -13.098  -6.317  1.00 32.99           N  
ANISOU 2024  NE1 TRP C  40     4604   3247   4685    150    255    211       N  
ATOM   2025  CZ2 TRP C  40      38.413 -11.353  -5.082  1.00 32.64           C  
ANISOU 2025  CZ2 TRP C  40     4652   3419   4331    225    294    167       C  
ATOM   2026  CZ3 TRP C  40      38.362  -9.203  -6.176  1.00 35.02           C  
ANISOU 2026  CZ3 TRP C  40     4843   3782   4682    222    248     16       C  
ATOM   2027  CH2 TRP C  40      38.773 -10.036  -5.131  1.00 37.34           C  
ANISOU 2027  CH2 TRP C  40     5230   4096   4860    236    286     78       C  
ATOM   2028  N   GLU C  41      33.490  -9.447 -10.715  1.00 20.11           N  
ANISOU 2028  N   GLU C  41     2389   1682   3569     31    -73     72       N  
ATOM   2029  CA  GLU C  41      33.062  -8.906 -11.995  1.00 28.19           C  
ANISOU 2029  CA  GLU C  41     3323   2746   4642     11   -246     90       C  
ATOM   2030  C   GLU C  41      33.952  -7.743 -12.397  1.00 30.25           C  
ANISOU 2030  C   GLU C  41     3650   3069   4773     62   -288    107       C  
ATOM   2031  O   GLU C  41      34.579  -7.093 -11.559  1.00 26.94           O  
ANISOU 2031  O   GLU C  41     3294   2641   4302    114   -172     96       O  
ATOM   2032  CB  GLU C  41      31.603  -8.427 -11.982  1.00 34.01           C  
ANISOU 2032  CB  GLU C  41     3853   3436   5632      3   -253    153       C  
ATOM   2033  CG  GLU C  41      30.672  -9.186 -11.062  1.00 52.30           C  
ANISOU 2033  CG  GLU C  41     6072   5678   8120    -38   -108    157       C  
ATOM   2034  CD  GLU C  41      29.337  -8.486 -10.904  1.00 58.60           C  
ANISOU 2034  CD  GLU C  41     6634   6440   9190    -19    -70    212       C  
ATOM   2035  OE1 GLU C  41      29.321  -7.277 -10.601  1.00 59.69           O  
ANISOU 2035  OE1 GLU C  41     6735   6565   9378     73     -4    229       O  
ATOM   2036  OE2 GLU C  41      28.298  -9.147 -11.113  1.00 64.86           O1-
ANISOU 2036  OE2 GLU C  41     7262   7205  10176    -97   -110    230       O1-
ATOM   2037  N   LYS C  42      33.989  -7.488 -13.701  1.00 30.65           N  
ANISOU 2037  N   LYS C  42     3689   3190   4766     32   -460    136       N  
ATOM   2038  CA  LYS C  42      34.628  -6.303 -14.255  1.00 30.43           C  
ANISOU 2038  CA  LYS C  42     3700   3212   4650     58   -512    199       C  
ATOM   2039  C   LYS C  42      33.615  -5.623 -15.159  1.00 30.39           C  
ANISOU 2039  C   LYS C  42     3566   3212   4769     47   -672    318       C  
ATOM   2040  O   LYS C  42      33.081  -6.257 -16.075  1.00 25.91           O  
ANISOU 2040  O   LYS C  42     2958   2712   4176    -18   -829    321       O  
ATOM   2041  CB  LYS C  42      35.902  -6.658 -15.030  1.00 28.59           C  
ANISOU 2041  CB  LYS C  42     3604   3095   4166     26   -557    147       C  
ATOM   2042  CG  LYS C  42      36.511  -5.502 -15.818  1.00 32.23           C  
ANISOU 2042  CG  LYS C  42     4097   3623   4527     18   -616    241       C  
ATOM   2043  CD  LYS C  42      37.801  -5.948 -16.478  1.00 41.63           C  
ANISOU 2043  CD  LYS C  42     5402   4943   5472    -16   -610    170       C  
ATOM   2044  CE  LYS C  42      38.051  -5.236 -17.796  1.00 43.25           C  
ANISOU 2044  CE  LYS C  42     5635   5268   5529    -73   -716    278       C  
ATOM   2045  NZ  LYS C  42      38.156  -3.775 -17.642  1.00 37.73           N1+
ANISOU 2045  NZ  LYS C  42     4911   4503   4920    -58   -702    430       N1+
ATOM   2046  N   ASP C  43      33.342  -4.347 -14.889  1.00 34.72           N  
ANISOU 2046  N   ASP C  43     4047   3680   5465    111   -644    413       N  
ATOM   2047  CA  ASP C  43      32.363  -3.568 -15.643  1.00 27.28           C  
ANISOU 2047  CA  ASP C  43     2960   2713   4692    130   -804    563       C  
ATOM   2048  C   ASP C  43      31.042  -4.323 -15.762  1.00 35.17           C  
ANISOU 2048  C   ASP C  43     3786   3712   5864    103   -889    560       C  
ATOM   2049  O   ASP C  43      30.473  -4.461 -16.846  1.00 39.80           O  
ANISOU 2049  O   ASP C  43     4301   4381   6442     53  -1113    641       O  
ATOM   2050  CB  ASP C  43      32.906  -3.203 -17.024  1.00 34.34           C  
ANISOU 2050  CB  ASP C  43     3937   3728   5381     77   -990    678       C  
ATOM   2051  CG  ASP C  43      34.166  -2.362 -16.951  1.00 43.90           C  
ANISOU 2051  CG  ASP C  43     5285   4930   6464     86   -900    704       C  
ATOM   2052  OD1 ASP C  43      34.280  -1.527 -16.029  1.00 42.27           O  
ANISOU 2052  OD1 ASP C  43     5062   4580   6420    152   -764    696       O  
ATOM   2053  OD2 ASP C  43      35.049  -2.544 -17.815  1.00 49.76           O1-
ANISOU 2053  OD2 ASP C  43     6148   5812   6945     17   -955    718       O1-
ATOM   2054  N   GLY C  44      30.571  -4.849 -14.631  1.00 33.12           N  
ANISOU 2054  N   GLY C  44     3461   3374   5749    120   -711    467       N  
ATOM   2055  CA  GLY C  44      29.264  -5.472 -14.556  1.00 43.48           C  
ANISOU 2055  CA  GLY C  44     4572   4663   7287     87   -747    469       C  
ATOM   2056  C   GLY C  44      29.160  -6.880 -15.105  1.00 45.34           C  
ANISOU 2056  C   GLY C  44     4837   4973   7418    -37   -856    391       C  
ATOM   2057  O   GLY C  44      28.141  -7.540 -14.868  1.00 54.49           O  
ANISOU 2057  O   GLY C  44     5831   6094   8777    -90   -852    372       O  
ATOM   2058  N   GLN C  45      30.173  -7.370 -15.829  1.00 38.09           N  
ANISOU 2058  N   GLN C  45     4111   4148   6212    -91   -940    331       N  
ATOM   2059  CA  GLN C  45      30.168  -8.703 -16.418  1.00 42.81           C  
ANISOU 2059  CA  GLN C  45     4760   4796   6711   -205  -1040    217       C  
ATOM   2060  C   GLN C  45      31.140  -9.620 -15.682  1.00 40.78           C  
ANISOU 2060  C   GLN C  45     4675   4488   6333   -205   -860     95       C  
ATOM   2061  O   GLN C  45      32.111  -9.142 -15.089  1.00 38.85           O  
ANISOU 2061  O   GLN C  45     4546   4238   5977   -127   -723    101       O  
ATOM   2062  CB  GLN C  45      30.546  -8.648 -17.903  1.00 47.52           C  
ANISOU 2062  CB  GLN C  45     5442   5548   7066   -265  -1271    216       C  
ATOM   2063  CG  GLN C  45      29.513  -7.968 -18.783  1.00 55.76           C  
ANISOU 2063  CG  GLN C  45     6316   6663   8207   -286  -1516    357       C  
ATOM   2064  CD  GLN C  45      29.975  -7.825 -20.220  1.00 60.75           C  
ANISOU 2064  CD  GLN C  45     7069   7484   8531   -351  -1735    381       C  
ATOM   2065  NE2 GLN C  45      31.279  -7.674 -20.411  1.00 57.75           N  
ANISOU 2065  NE2 GLN C  45     6896   7166   7881   -333  -1634    343       N  
ATOM   2066  OE1 GLN C  45      29.167  -7.846 -21.148  1.00 70.72           O  
ANISOU 2066  OE1 GLN C  45     8232   8849   9788   -424  -1993    436       O  
ATOM   2067  N   PRO C  46      30.911 -10.938 -15.690  1.00 38.24           N  
ANISOU 2067  N   PRO C  46     4364   4115   6051   -291   -867     -9       N  
ATOM   2068  CA  PRO C  46      31.828 -11.841 -14.981  1.00 33.97           C  
ANISOU 2068  CA  PRO C  46     3979   3499   5429   -274   -711    -94       C  
ATOM   2069  C   PRO C  46      33.270 -11.632 -15.420  1.00 37.01           C  
ANISOU 2069  C   PRO C  46     4541   3974   5548   -216   -709   -149       C  
ATOM   2070  O   PRO C  46      33.562 -11.424 -16.600  1.00 36.93           O  
ANISOU 2070  O   PRO C  46     4573   4083   5377   -247   -850   -188       O  
ATOM   2071  CB  PRO C  46      31.310 -13.241 -15.340  1.00 35.03           C  
ANISOU 2071  CB  PRO C  46     4095   3553   5663   -392   -782   -203       C  
ATOM   2072  CG  PRO C  46      30.313 -13.037 -16.450  1.00 40.39           C  
ANISOU 2072  CG  PRO C  46     4632   4315   6399   -485  -1012   -208       C  
ATOM   2073  CD  PRO C  46      29.758 -11.664 -16.245  1.00 35.22           C  
ANISOU 2073  CD  PRO C  46     3836   3716   5832   -411  -1018    -46       C  
ATOM   2074  N   LEU C  47      34.169 -11.647 -14.440  1.00 27.94           N  
ANISOU 2074  N   LEU C  47     3487   2784   4346   -138   -547   -143       N  
ATOM   2075  CA  LEU C  47      35.574 -11.372 -14.691  1.00 30.35           C  
ANISOU 2075  CA  LEU C  47     3921   3173   4439    -78   -524   -184       C  
ATOM   2076  C   LEU C  47      36.166 -12.430 -15.610  1.00 32.35           C  
ANISOU 2076  C   LEU C  47     4261   3450   4583   -111   -587   -333       C  
ATOM   2077  O   LEU C  47      36.024 -13.631 -15.364  1.00 32.27           O  
ANISOU 2077  O   LEU C  47     4272   3318   4670   -133   -564   -410       O  
ATOM   2078  CB  LEU C  47      36.330 -11.331 -13.363  1.00 34.48           C  
ANISOU 2078  CB  LEU C  47     4503   3646   4950      3   -365   -152       C  
ATOM   2079  CG  LEU C  47      37.828 -11.046 -13.403  1.00 30.09           C  
ANISOU 2079  CG  LEU C  47     4042   3172   4218     66   -333   -188       C  
ATOM   2080  CD1 LEU C  47      38.097  -9.669 -13.973  1.00 26.95           C  
ANISOU 2080  CD1 LEU C  47     3625   2882   3734     64   -372   -138       C  
ATOM   2081  CD2 LEU C  47      38.419 -11.191 -12.008  1.00 29.31           C  
ANISOU 2081  CD2 LEU C  47     3990   3027   4119    132   -216   -153       C  
ATOM   2082  N   SER C  48      36.833 -11.982 -16.674  1.00 32.97           N  
ANISOU 2082  N   SER C  48     4390   3675   4464   -118   -653   -376       N  
ATOM   2083  CA  SER C  48      37.461 -12.899 -17.625  1.00 37.19           C  
ANISOU 2083  CA  SER C  48     5011   4256   4863   -145   -685   -554       C  
ATOM   2084  C   SER C  48      38.762 -13.420 -17.032  1.00 37.48           C  
ANISOU 2084  C   SER C  48     5118   4246   4877    -45   -546   -620       C  
ATOM   2085  O   SER C  48      39.779 -12.719 -17.012  1.00 31.00           O  
ANISOU 2085  O   SER C  48     4317   3528   3933     10   -484   -587       O  
ATOM   2086  CB  SER C  48      37.713 -12.215 -18.962  1.00 36.09           C  
ANISOU 2086  CB  SER C  48     4905   4321   4486   -197   -780   -565       C  
ATOM   2087  OG  SER C  48      38.440 -13.082 -19.816  1.00 44.05           O  
ANISOU 2087  OG  SER C  48     6006   5393   5339   -213   -765   -769       O  
ATOM   2088  N   LEU C  49      38.735 -14.668 -16.572  1.00 37.99           N  
ANISOU 2088  N   LEU C  49     5207   4144   5082    -25   -507   -704       N  
ATOM   2089  CA  LEU C  49      39.882 -15.309 -15.931  1.00 41.69           C  
ANISOU 2089  CA  LEU C  49     5724   4536   5580     87   -400   -742       C  
ATOM   2090  C   LEU C  49      40.769 -15.916 -17.011  1.00 44.21           C  
ANISOU 2090  C   LEU C  49     6097   4912   5789    110   -388   -951       C  
ATOM   2091  O   LEU C  49      40.494 -17.003 -17.522  1.00 52.57           O  
ANISOU 2091  O   LEU C  49     7193   5860   6922     77   -414  -1117       O  
ATOM   2092  CB  LEU C  49      39.408 -16.368 -14.943  1.00 45.28           C  
ANISOU 2092  CB  LEU C  49     6185   4764   6256    100   -366   -700       C  
ATOM   2093  CG  LEU C  49      38.370 -15.855 -13.944  1.00 42.21           C  
ANISOU 2093  CG  LEU C  49     5738   4334   5967     56   -348   -518       C  
ATOM   2094  CD1 LEU C  49      37.711 -16.997 -13.182  1.00 34.74           C  
ANISOU 2094  CD1 LEU C  49     4797   3170   5234     24   -309   -472       C  
ATOM   2095  CD2 LEU C  49      39.036 -14.865 -12.996  1.00 33.98           C  
ANISOU 2095  CD2 LEU C  49     4697   3383   4832    138   -275   -389       C  
ATOM   2096  N   GLY C  50      41.842 -15.219 -17.356  1.00 34.21           N  
ANISOU 2096  N   GLY C  50     4829   3813   4357    160   -333   -958       N  
ATOM   2097  CA  GLY C  50      42.766 -15.691 -18.359  1.00 36.66           C  
ANISOU 2097  CA  GLY C  50     5173   4210   4546    189   -277  -1160       C  
ATOM   2098  C   GLY C  50      44.204 -15.523 -17.906  1.00 28.83           C  
ANISOU 2098  C   GLY C  50     4136   3266   3550    315   -163  -1146       C  
ATOM   2099  O   GLY C  50      44.487 -15.375 -16.714  1.00 20.85           O  
ANISOU 2099  O   GLY C  50     3087   2179   2657    389   -149  -1004       O  
ATOM   2100  N   PRO C  51      45.142 -15.557 -18.848  1.00 27.38           N  
ANISOU 2100  N   PRO C  51     3949   3228   3226    335    -78  -1299       N  
ATOM   2101  CA  PRO C  51      46.549 -15.348 -18.487  1.00 23.25           C  
ANISOU 2101  CA  PRO C  51     3341   2773   2721    449     31  -1289       C  
ATOM   2102  C   PRO C  51      46.772 -14.007 -17.806  1.00 35.63           C  
ANISOU 2102  C   PRO C  51     4852   4443   4241    420     12  -1068       C  
ATOM   2103  O   PRO C  51      46.095 -13.016 -18.089  1.00 20.61           O  
ANISOU 2103  O   PRO C  51     2977   2628   2224    308    -44   -955       O  
ATOM   2104  CB  PRO C  51      47.285 -15.429 -19.835  1.00 32.19           C  
ANISOU 2104  CB  PRO C  51     4476   4090   3667    431    144  -1492       C  
ATOM   2105  CG  PRO C  51      46.221 -15.369 -20.886  1.00 34.46           C  
ANISOU 2105  CG  PRO C  51     4871   4453   3768    283     65  -1561       C  
ATOM   2106  CD  PRO C  51      44.990 -15.952 -20.257  1.00 31.91           C  
ANISOU 2106  CD  PRO C  51     4590   3906   3629    259    -69  -1517       C  
ATOM   2107  N   ASN C  52      47.717 -14.008 -16.864  1.00 21.09           N  
ANISOU 2107  N   ASN C  52     2927   2574   2512    526     46  -1009       N  
ATOM   2108  CA  ASN C  52      48.171 -12.844 -16.114  1.00 26.37           C  
ANISOU 2108  CA  ASN C  52     3531   3329   3159    505     32   -847       C  
ATOM   2109  C   ASN C  52      47.146 -12.337 -15.116  1.00 23.90           C  
ANISOU 2109  C   ASN C  52     3270   2920   2892    460    -59   -688       C  
ATOM   2110  O   ASN C  52      47.328 -11.253 -14.555  1.00 32.90           O  
ANISOU 2110  O   ASN C  52     4380   4119   4003    419    -73   -578       O  
ATOM   2111  CB  ASN C  52      48.606 -11.707 -17.045  1.00 25.22           C  
ANISOU 2111  CB  ASN C  52     3355   3390   2839    401     90   -832       C  
ATOM   2112  CG  ASN C  52      49.830 -12.075 -17.847  1.00 30.87           C  
ANISOU 2112  CG  ASN C  52     3985   4235   3508    448    223   -979       C  
ATOM   2113  ND2 ASN C  52      49.949 -11.517 -19.046  1.00 36.63           N  
ANISOU 2113  ND2 ASN C  52     4735   5144   4040    343    299  -1010       N  
ATOM   2114  OD1 ASN C  52      50.655 -12.875 -17.398  1.00 26.82           O  
ANISOU 2114  OD1 ASN C  52     3385   3666   3138    583    262  -1059       O  
ATOM   2115  N   ILE C  53      46.086 -13.093 -14.860  1.00 21.65           N  
ANISOU 2115  N   ILE C  53     3054   2481   2690    459   -106   -685       N  
ATOM   2116  CA  ILE C  53      45.139 -12.765 -13.803  1.00 21.16           C  
ANISOU 2116  CA  ILE C  53     3024   2327   2690    429   -154   -544       C  
ATOM   2117  C   ILE C  53      45.046 -13.958 -12.863  1.00 23.36           C  
ANISOU 2117  C   ILE C  53     3330   2436   3110    513   -161   -518       C  
ATOM   2118  O   ILE C  53      45.015 -15.108 -13.313  1.00 23.87           O  
ANISOU 2118  O   ILE C  53     3416   2389   3263    552   -155   -618       O  
ATOM   2119  CB  ILE C  53      43.754 -12.402 -14.371  1.00 36.51           C  
ANISOU 2119  CB  ILE C  53     5002   4253   4616    321   -200   -520       C  
ATOM   2120  CG1 ILE C  53      43.882 -11.179 -15.277  1.00 42.09           C  
ANISOU 2120  CG1 ILE C  53     5690   5119   5185    245   -208   -496       C  
ATOM   2121  CG2 ILE C  53      42.766 -12.143 -13.240  1.00 42.52           C  
ANISOU 2121  CG2 ILE C  53     5771   4916   5470    303   -211   -395       C  
ATOM   2122  CD1 ILE C  53      42.623 -10.368 -15.400  1.00 52.74           C  
ANISOU 2122  CD1 ILE C  53     7038   6450   6550    164   -273   -393       C  
ATOM   2123  N   GLU C  54      45.017 -13.690 -11.557  1.00 23.25           N  
ANISOU 2123  N   GLU C  54     3324   2397   3112    536   -172   -385       N  
ATOM   2124  CA  GLU C  54      44.870 -14.766 -10.589  1.00 25.11           C  
ANISOU 2124  CA  GLU C  54     3602   2480   3459    601   -182   -305       C  
ATOM   2125  C   GLU C  54      44.086 -14.278  -9.378  1.00 24.72           C  
ANISOU 2125  C   GLU C  54     3597   2421   3375    551   -172   -159       C  
ATOM   2126  O   GLU C  54      44.181 -13.110  -8.989  1.00 17.46           O  
ANISOU 2126  O   GLU C  54     2664   1622   2350    514   -166   -134       O  
ATOM   2127  CB  GLU C  54      46.232 -15.332 -10.162  1.00 23.05           C  
ANISOU 2127  CB  GLU C  54     3297   2223   3237    736   -206   -295       C  
ATOM   2128  CG  GLU C  54      47.182 -14.340  -9.543  1.00 40.81           C  
ANISOU 2128  CG  GLU C  54     5486   4643   5376    752   -237   -247       C  
ATOM   2129  CD  GLU C  54      48.555 -14.945  -9.267  1.00 47.37           C  
ANISOU 2129  CD  GLU C  54     6229   5491   6279    892   -282   -243       C  
ATOM   2130  OE1 GLU C  54      48.914 -15.949  -9.918  1.00 47.72           O  
ANISOU 2130  OE1 GLU C  54     6240   5434   6458    984   -258   -330       O  
ATOM   2131  OE2 GLU C  54      49.274 -14.419  -8.390  1.00 52.98           O1-
ANISOU 2131  OE2 GLU C  54     6894   6313   6923    911   -348   -165       O1-
ATOM   2132  N   ILE C  55      43.287 -15.187  -8.812  1.00 27.93           N  
ANISOU 2132  N   ILE C  55     4057   2675   3881    542   -153    -75       N  
ATOM   2133  CA  ILE C  55      42.550 -14.976  -7.568  1.00 26.04           C  
ANISOU 2133  CA  ILE C  55     3867   2425   3604    499   -108     69       C  
ATOM   2134  C   ILE C  55      43.253 -15.742  -6.459  1.00 21.29           C  
ANISOU 2134  C   ILE C  55     3320   1784   2987    585   -136    208       C  
ATOM   2135  O   ILE C  55      43.446 -16.962  -6.562  1.00 22.62           O  
ANISOU 2135  O   ILE C  55     3506   1793   3294    645   -160    244       O  
ATOM   2136  CB  ILE C  55      41.088 -15.447  -7.668  1.00 35.37           C  
ANISOU 2136  CB  ILE C  55     5054   3474   4911    406    -52    100       C  
ATOM   2137  CG1 ILE C  55      40.422 -14.907  -8.929  1.00 36.09           C  
ANISOU 2137  CG1 ILE C  55     5078   3595   5039    332    -73    -27       C  
ATOM   2138  CG2 ILE C  55      40.322 -15.022  -6.419  1.00 36.42           C  
ANISOU 2138  CG2 ILE C  55     5218   3637   4982    354     40    230       C  
ATOM   2139  CD1 ILE C  55      40.350 -13.430  -8.966  1.00 29.06           C  
ANISOU 2139  CD1 ILE C  55     4149   2853   4041    306    -62    -43       C  
ATOM   2140  N   ILE C  56      43.588 -15.039  -5.385  1.00 23.28           N  
ANISOU 2140  N   ILE C  56     3602   2170   3073    586   -141    287       N  
ATOM   2141  CA  ILE C  56      44.371 -15.579  -4.282  1.00 27.02           C  
ANISOU 2141  CA  ILE C  56     4127   2665   3474    664   -206    437       C  
ATOM   2142  C   ILE C  56      43.514 -15.602  -3.025  1.00 21.90           C  
ANISOU 2142  C   ILE C  56     3584   2029   2710    595   -129    595       C  
ATOM   2143  O   ILE C  56      42.779 -14.650  -2.737  1.00 30.81           O  
ANISOU 2143  O   ILE C  56     4724   3247   3737    505    -36    544       O  
ATOM   2144  CB  ILE C  56      45.645 -14.746  -4.047  1.00 32.98           C  
ANISOU 2144  CB  ILE C  56     4828   3610   4094    711   -302    385       C  
ATOM   2145  CG1 ILE C  56      46.446 -14.591  -5.340  1.00 34.01           C  
ANISOU 2145  CG1 ILE C  56     4840   3757   4327    758   -333    224       C  
ATOM   2146  CG2 ILE C  56      46.492 -15.362  -2.951  1.00 37.08           C  
ANISOU 2146  CG2 ILE C  56     5383   4167   4541    799   -414    553       C  
ATOM   2147  CD1 ILE C  56      47.094 -15.841  -5.789  1.00 41.52           C  
ANISOU 2147  CD1 ILE C  56     5748   4577   5450    883   -378    234       C  
ATOM   2148  N   HIS C  57      43.617 -16.688  -2.271  1.00 23.86           N  
ANISOU 2148  N   HIS C  57     3905   2183   2977    639   -157    792       N  
ATOM   2149  CA  HIS C  57      42.992 -16.803  -0.960  1.00 25.42           C  
ANISOU 2149  CA  HIS C  57     4220   2426   3014    574    -81    980       C  
ATOM   2150  C   HIS C  57      44.073 -17.208   0.027  1.00 27.79           C  
ANISOU 2150  C   HIS C  57     4584   2810   3165    664   -224   1160       C  
ATOM   2151  O   HIS C  57      44.789 -18.187  -0.209  1.00 28.52           O  
ANISOU 2151  O   HIS C  57     4651   2769   3418    779   -337   1253       O  
ATOM   2152  CB  HIS C  57      41.852 -17.825  -0.979  1.00 29.48           C  
ANISOU 2152  CB  HIS C  57     4770   2726   3706    508     34   1106       C  
ATOM   2153  CG  HIS C  57      41.189 -18.028   0.347  1.00 32.80           C  
ANISOU 2153  CG  HIS C  57     5308   3195   3959    428    146   1325       C  
ATOM   2154  CD2 HIS C  57      40.542 -19.100   0.863  1.00 35.63           C  
ANISOU 2154  CD2 HIS C  57     5738   3395   4403    376    226   1555       C  
ATOM   2155  ND1 HIS C  57      41.137 -17.047   1.316  1.00 37.30           N  
ANISOU 2155  ND1 HIS C  57     5941   4005   4225    379    206   1317       N  
ATOM   2156  CE1 HIS C  57      40.488 -17.507   2.371  1.00 38.13           C  
ANISOU 2156  CE1 HIS C  57     6158   4125   4205    303    329   1530       C  
ATOM   2157  NE2 HIS C  57      40.122 -18.752   2.124  1.00 39.31           N  
ANISOU 2157  NE2 HIS C  57     6312   4033   4592    297    343   1697       N  
ATOM   2158  N   GLU C  58      44.202 -16.452   1.119  1.00 28.20           N  
ANISOU 2158  N   GLU C  58     4713   3084   2916    615   -227   1200       N  
ATOM   2159  CA  GLU C  58      45.176 -16.722   2.177  1.00 30.51           C  
ANISOU 2159  CA  GLU C  58     5076   3511   3007    679   -392   1381       C  
ATOM   2160  C   GLU C  58      44.487 -16.603   3.535  1.00 32.56           C  
ANISOU 2160  C   GLU C  58     5504   3909   2959    574   -291   1540       C  
ATOM   2161  O   GLU C  58      43.310 -16.243   3.625  1.00 34.32           O  
ANISOU 2161  O   GLU C  58     5764   4124   3153    461    -76   1481       O  
ATOM   2162  CB  GLU C  58      46.372 -15.766   2.076  1.00 38.31           C  
ANISOU 2162  CB  GLU C  58     5972   4695   3890    720   -550   1214       C  
ATOM   2163  CG  GLU C  58      47.084 -15.825   0.742  1.00 45.66           C  
ANISOU 2163  CG  GLU C  58     6731   5524   5095    813   -614   1057       C  
ATOM   2164  CD  GLU C  58      48.359 -15.010   0.715  1.00 54.83           C  
ANISOU 2164  CD  GLU C  58     7779   6876   6179    846   -771    934       C  
ATOM   2165  OE1 GLU C  58      48.548 -14.170   1.619  1.00 58.28           O  
ANISOU 2165  OE1 GLU C  58     8273   7519   6352    769   -821    908       O  
ATOM   2166  OE2 GLU C  58      49.176 -15.221  -0.209  1.00 55.95           O1-
ANISOU 2166  OE2 GLU C  58     7769   6962   6528    941   -836    850       O1-
ATOM   2167  N   GLY C  59      45.230 -16.893   4.600  1.00 35.21           N  
ANISOU 2167  N   GLY C  59     5932   4390   3055    610   -446   1741       N  
ATOM   2168  CA  GLY C  59      44.662 -16.876   5.939  1.00 39.25           C  
ANISOU 2168  CA  GLY C  59     6629   5065   3218    506   -354   1916       C  
ATOM   2169  C   GLY C  59      44.195 -15.489   6.351  1.00 54.09           C  
ANISOU 2169  C   GLY C  59     8551   7168   4834    383   -211   1661       C  
ATOM   2170  O   GLY C  59      44.423 -14.485   5.674  1.00 53.83           O  
ANISOU 2170  O   GLY C  59     8406   7163   4882    381   -219   1373       O  
ATOM   2171  N   LEU C  60      43.515 -15.444   7.502  1.00 59.52           N  
ANISOU 2171  N   LEU C  60     9407   8007   5202    276    -63   1776       N  
ATOM   2172  CA  LEU C  60      42.984 -14.196   8.061  1.00 60.64           C  
ANISOU 2172  CA  LEU C  60     9611   8356   5075    160    111   1528       C  
ATOM   2173  C   LEU C  60      41.961 -13.554   7.124  1.00 59.26           C  
ANISOU 2173  C   LEU C  60     9305   8024   5187    125    342   1280       C  
ATOM   2174  O   LEU C  60      41.897 -12.329   7.001  1.00 61.14           O  
ANISOU 2174  O   LEU C  60     9504   8344   5385     91    401    989       O  
ATOM   2175  CB  LEU C  60      44.102 -13.198   8.384  1.00 60.99           C  
ANISOU 2175  CB  LEU C  60     9657   8626   4891    165    -98   1325       C  
ATOM   2176  CG  LEU C  60      45.136 -13.512   9.465  1.00 61.20           C  
ANISOU 2176  CG  LEU C  60     9719   8898   4637    162   -350   1489       C  
ATOM   2177  CD1 LEU C  60      46.434 -12.763   9.190  1.00 57.39           C  
ANISOU 2177  CD1 LEU C  60     9133   8523   4151    206   -617   1296       C  
ATOM   2178  CD2 LEU C  60      44.592 -13.154  10.835  1.00 58.68           C  
ANISOU 2178  CD2 LEU C  60     9502   8856   3940     45   -198   1473       C  
ATOM   2179  N   ASP C  61      41.168 -14.389   6.444  1.00 52.92           N  
ANISOU 2179  N   ASP C  61     8429   6982   4695    133    455   1400       N  
ATOM   2180  CA  ASP C  61      40.074 -13.946   5.576  1.00 48.91           C  
ANISOU 2180  CA  ASP C  61     7786   6327   4470     95    655   1218       C  
ATOM   2181  C   ASP C  61      40.560 -13.133   4.379  1.00 40.35           C  
ANISOU 2181  C   ASP C  61     6550   5176   3604    158    536    961       C  
ATOM   2182  O   ASP C  61      39.796 -12.356   3.799  1.00 33.16           O  
ANISOU 2182  O   ASP C  61     5539   4209   2850    128    670    772       O  
ATOM   2183  CB  ASP C  61      39.035 -13.135   6.360  1.00 58.07           C  
ANISOU 2183  CB  ASP C  61     8996   7625   5445     -9    939   1099       C  
ATOM   2184  CG  ASP C  61      38.536 -13.860   7.591  1.00 70.38           C  
ANISOU 2184  CG  ASP C  61    10715   9292   6734    -94   1096   1355       C  
ATOM   2185  OD1 ASP C  61      38.428 -15.105   7.543  1.00 71.36           O  
ANISOU 2185  OD1 ASP C  61    10860   9275   6979    -93   1066   1643       O  
ATOM   2186  OD2 ASP C  61      38.252 -13.183   8.605  1.00 77.71           O1-
ANISOU 2186  OD2 ASP C  61    11755  10443   7330   -167   1259   1265       O1-
ATOM   2187  N   TYR C  62      41.813 -13.310   3.982  1.00 33.43           N  
ANISOU 2187  N   TYR C  62     5645   4303   2756    247    289    969       N  
ATOM   2188  CA  TYR C  62      42.427 -12.487   2.952  1.00 27.54           C  
ANISOU 2188  CA  TYR C  62     4768   3533   2162    290    182    744       C  
ATOM   2189  C   TYR C  62      42.122 -13.036   1.559  1.00 25.54           C  
ANISOU 2189  C   TYR C  62     4385   3058   2259    334    177    730       C  
ATOM   2190  O   TYR C  62      42.312 -14.227   1.300  1.00 26.49           O  
ANISOU 2190  O   TYR C  62     4504   3048   2511    389    109    889       O  
ATOM   2191  CB  TYR C  62      43.936 -12.426   3.192  1.00 35.21           C  
ANISOU 2191  CB  TYR C  62     5742   4634   3004    354    -65    753       C  
ATOM   2192  CG  TYR C  62      44.726 -11.735   2.107  1.00 42.54           C  
ANISOU 2192  CG  TYR C  62     6523   5539   4102    393   -176    562       C  
ATOM   2193  CD1 TYR C  62      45.250 -12.457   1.037  1.00 42.28           C  
ANISOU 2193  CD1 TYR C  62     6377   5370   4316    486   -271    598       C  
ATOM   2194  CD2 TYR C  62      44.971 -10.371   2.161  1.00 45.97           C  
ANISOU 2194  CD2 TYR C  62     6935   6082   4450    331   -172    342       C  
ATOM   2195  CE1 TYR C  62      45.978 -11.841   0.047  1.00 43.90           C  
ANISOU 2195  CE1 TYR C  62     6452   5579   4650    509   -343    437       C  
ATOM   2196  CE2 TYR C  62      45.704  -9.746   1.173  1.00 48.19           C  
ANISOU 2196  CE2 TYR C  62     7083   6339   4889    349   -260    201       C  
ATOM   2197  CZ  TYR C  62      46.204 -10.488   0.120  1.00 46.58           C  
ANISOU 2197  CZ  TYR C  62     6768   6031   4900    435   -339    257       C  
ATOM   2198  OH  TYR C  62      46.933  -9.876  -0.869  1.00 53.46           O  
ANISOU 2198  OH  TYR C  62     7509   6902   5902    440   -397    128       O  
ATOM   2199  N   TYR C  63      41.667 -12.164   0.661  1.00 23.90           N  
ANISOU 2199  N   TYR C  63     4075   2805   2201    310    240    538       N  
ATOM   2200  CA  TYR C  63      41.477 -12.500  -0.746  1.00 28.72           C  
ANISOU 2200  CA  TYR C  63     4568   3254   3090    339    207    490       C  
ATOM   2201  C   TYR C  63      42.106 -11.416  -1.604  1.00 29.34           C  
ANISOU 2201  C   TYR C  63     4559   3382   3207    353    130    306       C  
ATOM   2202  O   TYR C  63      42.061 -10.233  -1.256  1.00 29.19           O  
ANISOU 2202  O   TYR C  63     4546   3453   3093    311    175    189       O  
ATOM   2203  CB  TYR C  63      40.000 -12.633  -1.123  1.00 21.87           C  
ANISOU 2203  CB  TYR C  63     3648   2265   2396    273    366    490       C  
ATOM   2204  CG  TYR C  63      39.292 -13.815  -0.505  1.00 35.47           C  
ANISOU 2204  CG  TYR C  63     5429   3898   4151    235    459    684       C  
ATOM   2205  CD1 TYR C  63      38.666 -13.700   0.726  1.00 32.75           C  
ANISOU 2205  CD1 TYR C  63     5166   3642   3633    171    621    771       C  
ATOM   2206  CD2 TYR C  63      39.221 -15.032  -1.163  1.00 31.65           C  
ANISOU 2206  CD2 TYR C  63     4920   3232   3874    251    401    771       C  
ATOM   2207  CE1 TYR C  63      38.006 -14.763   1.295  1.00 34.77           C  
ANISOU 2207  CE1 TYR C  63     5474   3817   3918    117    726    977       C  
ATOM   2208  CE2 TYR C  63      38.555 -16.103  -0.599  1.00 33.89           C  
ANISOU 2208  CE2 TYR C  63     5254   3401   4220    198    491    963       C  
ATOM   2209  CZ  TYR C  63      37.950 -15.961   0.631  1.00 38.80           C  
ANISOU 2209  CZ  TYR C  63     5954   4123   4667    127    655   1083       C  
ATOM   2210  OH  TYR C  63      37.289 -17.022   1.205  1.00 44.40           O  
ANISOU 2210  OH  TYR C  63     6715   4721   5435     56    763   1304       O  
ATOM   2211  N   ALA C  64      42.688 -11.813  -2.730  1.00 26.53           N  
ANISOU 2211  N   ALA C  64     4126   2959   2995    404     29    275       N  
ATOM   2212  CA  ALA C  64      43.354 -10.845  -3.588  1.00 28.98           C  
ANISOU 2212  CA  ALA C  64     4354   3325   3332    405    -32    133       C  
ATOM   2213  C   ALA C  64      43.095 -11.152  -5.053  1.00 28.99           C  
ANISOU 2213  C   ALA C  64     4276   3228   3511    412    -43     83       C  
ATOM   2214  O   ALA C  64      43.036 -12.315  -5.462  1.00 27.50           O  
ANISOU 2214  O   ALA C  64     4088   2940   3422    451    -65    129       O  
ATOM   2215  CB  ALA C  64      44.868 -10.805  -3.329  1.00 18.38           C  
ANISOU 2215  CB  ALA C  64     2992   2096   1895    458   -168    125       C  
ATOM   2216  N   LEU C  65      42.939 -10.090  -5.829  1.00 28.95           N  
ANISOU 2216  N   LEU C  65     4214   3247   3540    369    -33    -12       N  
ATOM   2217  CA  LEU C  65      42.890 -10.147  -7.282  1.00 28.48           C  
ANISOU 2217  CA  LEU C  65     4088   3153   3580    363    -65    -65       C  
ATOM   2218  C   LEU C  65      44.198  -9.544  -7.780  1.00 27.77           C  
ANISOU 2218  C   LEU C  65     3950   3167   3434    375   -125   -128       C  
ATOM   2219  O   LEU C  65      44.486  -8.370  -7.522  1.00 24.47           O  
ANISOU 2219  O   LEU C  65     3519   2809   2969    331   -121   -160       O  
ATOM   2220  CB  LEU C  65      41.674  -9.390  -7.805  1.00 29.02           C  
ANISOU 2220  CB  LEU C  65     4120   3175   3731    300    -19    -79       C  
ATOM   2221  CG  LEU C  65      41.575  -9.046  -9.291  1.00 28.58           C  
ANISOU 2221  CG  LEU C  65     4007   3128   3724    271    -73   -118       C  
ATOM   2222  CD1 LEU C  65      41.625 -10.302 -10.110  1.00 28.29           C  
ANISOU 2222  CD1 LEU C  65     3972   3056   3720    287   -116   -145       C  
ATOM   2223  CD2 LEU C  65      40.271  -8.307  -9.534  1.00 33.33           C  
ANISOU 2223  CD2 LEU C  65     4560   3676   4428    226    -48    -91       C  
ATOM   2224  N   HIS C  66      45.006 -10.353  -8.451  1.00 20.57           N  
ANISOU 2224  N   HIS C  66     3003   2267   2545    430   -167   -155       N  
ATOM   2225  CA  HIS C  66      46.318  -9.930  -8.911  1.00 24.67           C  
ANISOU 2225  CA  HIS C  66     3448   2898   3029    444   -200   -211       C  
ATOM   2226  C   HIS C  66      46.340  -9.937 -10.432  1.00 21.90           C  
ANISOU 2226  C   HIS C  66     3057   2566   2699    419   -177   -278       C  
ATOM   2227  O   HIS C  66      45.901 -10.905 -11.059  1.00 22.28           O  
ANISOU 2227  O   HIS C  66     3127   2544   2794    446   -170   -311       O  
ATOM   2228  CB  HIS C  66      47.413 -10.841  -8.355  1.00 21.98           C  
ANISOU 2228  CB  HIS C  66     3073   2580   2698    547   -256   -193       C  
ATOM   2229  CG  HIS C  66      48.797 -10.342  -8.622  1.00 33.31           C  
ANISOU 2229  CG  HIS C  66     4392   4147   4118    557   -288   -246       C  
ATOM   2230  CD2 HIS C  66      49.573  -9.460  -7.947  1.00 39.21           C  
ANISOU 2230  CD2 HIS C  66     5087   5002   4808    517   -339   -248       C  
ATOM   2231  ND1 HIS C  66      49.532 -10.738  -9.719  1.00 38.66           N  
ANISOU 2231  ND1 HIS C  66     4978   4860   4850    599   -255   -323       N  
ATOM   2232  CE1 HIS C  66      50.706 -10.130  -9.704  1.00 37.75           C  
ANISOU 2232  CE1 HIS C  66     4742   4874   4728    587   -274   -351       C  
ATOM   2233  NE2 HIS C  66      50.757  -9.350  -8.639  1.00 39.17           N  
ANISOU 2233  NE2 HIS C  66     4941   5094   4848    531   -340   -306       N  
ATOM   2234  N   ILE C  67      46.834  -8.855 -11.021  1.00 20.15           N  
ANISOU 2234  N   ILE C  67     2785   2438   2432    354   -165   -298       N  
ATOM   2235  CA  ILE C  67      46.969  -8.756 -12.470  1.00 23.86           C  
ANISOU 2235  CA  ILE C  67     3229   2970   2867    315   -135   -341       C  
ATOM   2236  C   ILE C  67      48.402  -8.362 -12.782  1.00 27.89           C  
ANISOU 2236  C   ILE C  67     3640   3611   3346    308   -105   -378       C  
ATOM   2237  O   ILE C  67      48.888  -7.338 -12.288  1.00 33.55           O  
ANISOU 2237  O   ILE C  67     4316   4368   4064    252   -115   -344       O  
ATOM   2238  CB  ILE C  67      45.990  -7.741 -13.079  1.00 30.82           C  
ANISOU 2238  CB  ILE C  67     4143   3836   3730    218   -141   -281       C  
ATOM   2239  CG1 ILE C  67      44.597  -7.918 -12.483  1.00 27.83           C  
ANISOU 2239  CG1 ILE C  67     3816   3332   3424    223   -164   -237       C  
ATOM   2240  CG2 ILE C  67      45.945  -7.897 -14.596  1.00 35.72           C  
ANISOU 2240  CG2 ILE C  67     4768   4536   4268    176   -132   -309       C  
ATOM   2241  CD1 ILE C  67      43.594  -6.932 -13.006  1.00 36.77           C  
ANISOU 2241  CD1 ILE C  67     4949   4434   4587    155   -185   -166       C  
ATOM   2242  N   ARG C  68      49.084  -9.170 -13.583  1.00 23.19           N  
ANISOU 2242  N   ARG C  68     2995   3075   2739    361    -58   -463       N  
ATOM   2243  CA  ARG C  68      50.429  -8.820 -14.003  1.00 31.15           C  
ANISOU 2243  CA  ARG C  68     3878   4225   3733    350      2   -503       C  
ATOM   2244  C   ARG C  68      50.410  -8.388 -15.463  1.00 23.65           C  
ANISOU 2244  C   ARG C  68     2938   3383   2665    257     88   -523       C  
ATOM   2245  O   ARG C  68      49.462  -8.668 -16.209  1.00 21.98           O  
ANISOU 2245  O   ARG C  68     2827   3145   2380    231     81   -534       O  
ATOM   2246  CB  ARG C  68      51.408  -9.984 -13.777  1.00 32.58           C  
ANISOU 2246  CB  ARG C  68     3961   4414   4003    493     17   -590       C  
ATOM   2247  CG  ARG C  68      51.171 -11.188 -14.637  1.00 34.76           C  
ANISOU 2247  CG  ARG C  68     4276   4643   4289    570     76   -708       C  
ATOM   2248  CD  ARG C  68      52.133 -12.348 -14.314  1.00 35.34           C  
ANISOU 2248  CD  ARG C  68     4241   4674   4513    740     90   -788       C  
ATOM   2249  NE  ARG C  68      53.541 -12.027 -14.542  1.00 34.26           N  
ANISOU 2249  NE  ARG C  68     3913   4693   4413    766    160   -833       N  
ATOM   2250  CZ  ARG C  68      54.134 -12.065 -15.731  1.00 41.37           C  
ANISOU 2250  CZ  ARG C  68     4738   5718   5263    752    314   -961       C  
ATOM   2251  NH1 ARG C  68      53.442 -12.395 -16.817  1.00 34.77           N1+
ANISOU 2251  NH1 ARG C  68     4025   4881   4305    708    393  -1063       N1+
ATOM   2252  NH2 ARG C  68      55.418 -11.752 -15.841  1.00 53.21           N  
ANISOU 2252  NH2 ARG C  68     6032   7362   6822    769    391   -990       N  
ATOM   2253  N   ASP C  69      51.457  -7.664 -15.851  1.00 26.94           N  
ANISOU 2253  N   ASP C  69     3245   3933   3057    192    162   -513       N  
ATOM   2254  CA  ASP C  69      51.633  -7.223 -17.233  1.00 35.74           C  
ANISOU 2254  CA  ASP C  69     4365   5187   4029     91    268   -506       C  
ATOM   2255  C   ASP C  69      50.359  -6.571 -17.764  1.00 25.12           C  
ANISOU 2255  C   ASP C  69     3162   3796   2586     -6    207   -392       C  
ATOM   2256  O   ASP C  69      49.835  -6.941 -18.817  1.00 24.81           O  
ANISOU 2256  O   ASP C  69     3204   3819   2403    -32    224   -421       O  
ATOM   2257  CB  ASP C  69      52.062  -8.387 -18.125  1.00 45.48           C  
ANISOU 2257  CB  ASP C  69     5575   6508   5197    170    377   -672       C  
ATOM   2258  CG  ASP C  69      53.371  -9.001 -17.685  1.00 67.36           C  
ANISOU 2258  CG  ASP C  69     8169   9321   8106    286    443   -775       C  
ATOM   2259  OD1 ASP C  69      53.786  -8.755 -16.530  1.00 74.67           O  
ANISOU 2259  OD1 ASP C  69     9009  10191   9171    322    356   -716       O  
ATOM   2260  OD2 ASP C  69      53.990  -9.724 -18.496  1.00 74.81           O1-
ANISOU 2260  OD2 ASP C  69     9049  10358   9017    344    580   -923       O1-
ATOM   2261  N   THR C  70      49.850  -5.603 -17.005  1.00 19.63           N  
ANISOU 2261  N   THR C  70     2492   2990   1976    -54    126   -272       N  
ATOM   2262  CA  THR C  70      48.560  -5.012 -17.323  1.00 26.34           C  
ANISOU 2262  CA  THR C  70     3448   3759   2801   -111     49   -155       C  
ATOM   2263  C   THR C  70      48.583  -4.385 -18.707  1.00 25.90           C  
ANISOU 2263  C   THR C  70     3425   3830   2586   -226     89    -52       C  
ATOM   2264  O   THR C  70      49.606  -3.874 -19.169  1.00 28.86           O  
ANISOU 2264  O   THR C  70     3736   4323   2908   -303    191    -19       O  
ATOM   2265  CB  THR C  70      48.179  -3.946 -16.296  1.00 24.26           C  
ANISOU 2265  CB  THR C  70     3185   3350   2683   -140     -9    -65       C  
ATOM   2266  CG2 THR C  70      47.963  -4.572 -14.929  1.00 22.48           C  
ANISOU 2266  CG2 THR C  70     2961   3023   2557    -39    -51   -149       C  
ATOM   2267  OG1 THR C  70      49.219  -2.961 -16.230  1.00 32.52           O  
ANISOU 2267  OG1 THR C  70     4154   4436   3766   -230     46    -21       O  
ATOM   2268  N   LEU C  71      47.435  -4.430 -19.359  1.00 31.17           N  
ANISOU 2268  N   LEU C  71     4186   4483   3175   -246      3     12       N  
ATOM   2269  CA  LEU C  71      47.174  -3.827 -20.651  1.00 26.97           C  
ANISOU 2269  CA  LEU C  71     3715   4069   2464   -355    -10    154       C  
ATOM   2270  C   LEU C  71      46.092  -2.767 -20.488  1.00 24.33           C  
ANISOU 2270  C   LEU C  71     3412   3586   2245   -388   -138    356       C  
ATOM   2271  O   LEU C  71      45.410  -2.724 -19.458  1.00 30.41           O  
ANISOU 2271  O   LEU C  71     4164   4179   3212   -315   -200    337       O  
ATOM   2272  CB  LEU C  71      46.727  -4.901 -21.653  1.00 32.57           C  
ANISOU 2272  CB  LEU C  71     4500   4909   2966   -348    -35     39       C  
ATOM   2273  CG  LEU C  71      47.770  -5.985 -21.928  1.00 38.77           C  
ANISOU 2273  CG  LEU C  71     5252   5822   3657   -300    111   -188       C  
ATOM   2274  CD1 LEU C  71      47.217  -7.049 -22.858  1.00 35.87           C  
ANISOU 2274  CD1 LEU C  71     4977   5549   3104   -297     79   -344       C  
ATOM   2275  CD2 LEU C  71      49.017  -5.356 -22.518  1.00 44.03           C  
ANISOU 2275  CD2 LEU C  71     5860   6663   4207   -385    276   -137       C  
ATOM   2276  N   PRO C  72      45.917  -1.883 -21.473  1.00 29.28           N  
ANISOU 2276  N   PRO C  72     4085   4280   2763   -491   -171    563       N  
ATOM   2277  CA  PRO C  72      44.838  -0.884 -21.366  1.00 33.04           C  
ANISOU 2277  CA  PRO C  72     4574   4588   3390   -497   -307    770       C  
ATOM   2278  C   PRO C  72      43.458  -1.489 -21.181  1.00 38.10           C  
ANISOU 2278  C   PRO C  72     5223   5153   4102   -413   -453    729       C  
ATOM   2279  O   PRO C  72      42.614  -0.870 -20.521  1.00 37.81           O  
ANISOU 2279  O   PRO C  72     5146   4922   4298   -363   -525    811       O  
ATOM   2280  CB  PRO C  72      44.942  -0.119 -22.692  1.00 38.76           C  
ANISOU 2280  CB  PRO C  72     5361   5445   3921   -621   -331   1013       C  
ATOM   2281  CG  PRO C  72      46.376  -0.245 -23.074  1.00 39.39           C  
ANISOU 2281  CG  PRO C  72     5426   5702   3837   -701   -143    947       C  
ATOM   2282  CD  PRO C  72      46.802  -1.617 -22.624  1.00 34.42           C  
ANISOU 2282  CD  PRO C  72     4761   5144   3173   -607    -67    641       C  
ATOM   2283  N   GLU C  73      43.202  -2.680 -21.737  1.00 32.78           N  
ANISOU 2283  N   GLU C  73     4587   4617   3252   -402   -488    588       N  
ATOM   2284  CA  GLU C  73      41.902  -3.329 -21.578  1.00 32.44           C  
ANISOU 2284  CA  GLU C  73     4530   4502   3294   -347   -628    538       C  
ATOM   2285  C   GLU C  73      41.587  -3.660 -20.120  1.00 26.05           C  
ANISOU 2285  C   GLU C  73     3656   3496   2747   -245   -584    424       C  
ATOM   2286  O   GLU C  73      40.421  -3.890 -19.787  1.00 27.21           O  
ANISOU 2286  O   GLU C  73     3759   3542   3038   -205   -678    429       O  
ATOM   2287  CB  GLU C  73      41.846  -4.605 -22.426  1.00 42.42           C  
ANISOU 2287  CB  GLU C  73     5853   5937   4327   -374   -658    365       C  
ATOM   2288  CG  GLU C  73      42.279  -5.873 -21.676  1.00 57.11           C  
ANISOU 2288  CG  GLU C  73     7700   7743   6256   -296   -553    104       C  
ATOM   2289  CD  GLU C  73      42.830  -6.974 -22.587  1.00 69.27           C  
ANISOU 2289  CD  GLU C  73     9308   9454   7558   -325   -499   -102       C  
ATOM   2290  OE1 GLU C  73      43.053  -6.713 -23.791  1.00 73.86           O  
ANISOU 2290  OE1 GLU C  73     9956  10238   7870   -417   -509    -58       O  
ATOM   2291  OE2 GLU C  73      43.047  -8.104 -22.092  1.00 68.50           O1-
ANISOU 2291  OE2 GLU C  73     9202   9284   7543   -254   -438   -308       O1-
ATOM   2292  N   ASP C  74      42.592  -3.685 -19.246  1.00 22.84           N  
ANISOU 2292  N   ASP C  74     3233   3050   2397   -211   -447    328       N  
ATOM   2293  CA  ASP C  74      42.373  -3.999 -17.838  1.00 24.12           C  
ANISOU 2293  CA  ASP C  74     3355   3059   2750   -127   -404    232       C  
ATOM   2294  C   ASP C  74      41.802  -2.831 -17.040  1.00 24.18           C  
ANISOU 2294  C   ASP C  74     3323   2897   2969   -108   -412    337       C  
ATOM   2295  O   ASP C  74      41.345  -3.047 -15.915  1.00 27.68           O  
ANISOU 2295  O   ASP C  74     3741   3226   3552    -44   -377    266       O  
ATOM   2296  CB  ASP C  74      43.683  -4.483 -17.205  1.00 26.37           C  
ANISOU 2296  CB  ASP C  74     3634   3386   3000    -96   -287     97       C  
ATOM   2297  CG  ASP C  74      44.128  -5.837 -17.756  1.00 31.82           C  
ANISOU 2297  CG  ASP C  74     4348   4187   3556    -73   -260    -51       C  
ATOM   2298  OD1 ASP C  74      43.246  -6.661 -18.078  1.00 35.31           O  
ANISOU 2298  OD1 ASP C  74     4817   4609   3989    -61   -328   -103       O  
ATOM   2299  OD2 ASP C  74      45.348  -6.076 -17.877  1.00 26.07           O1-
ANISOU 2299  OD2 ASP C  74     3597   3555   2752    -66   -168   -128       O1-
ATOM   2300  N   THR C  75      41.820  -1.613 -17.587  1.00 26.16           N  
ANISOU 2300  N   THR C  75     3570   3119   3249   -161   -444    504       N  
ATOM   2301  CA  THR C  75      41.144  -0.486 -16.955  1.00 24.44           C  
ANISOU 2301  CA  THR C  75     3310   2704   3272   -130   -456    596       C  
ATOM   2302  C   THR C  75      39.657  -0.782 -16.797  1.00 25.28           C  
ANISOU 2302  C   THR C  75     3357   2726   3520    -61   -538    614       C  
ATOM   2303  O   THR C  75      39.029  -1.354 -17.689  1.00 23.99           O  
ANISOU 2303  O   THR C  75     3186   2659   3269    -77   -654    664       O  
ATOM   2304  CB  THR C  75      41.334   0.786 -17.797  1.00 27.10           C  
ANISOU 2304  CB  THR C  75     3659   3006   3633   -201   -500    812       C  
ATOM   2305  CG2 THR C  75      40.485   1.948 -17.268  1.00 32.39           C  
ANISOU 2305  CG2 THR C  75     4275   3429   4602   -148   -525    911       C  
ATOM   2306  OG1 THR C  75      42.712   1.169 -17.794  1.00 22.79           O  
ANISOU 2306  OG1 THR C  75     3140   2514   3006   -281   -399    793       O  
ATOM   2307  N   GLY C  76      39.091  -0.388 -15.664  1.00 24.96           N  
ANISOU 2307  N   GLY C  76     3266   2519   3698      7   -474    561       N  
ATOM   2308  CA  GLY C  76      37.666  -0.517 -15.451  1.00 25.12           C  
ANISOU 2308  CA  GLY C  76     3192   2449   3902     73   -522    586       C  
ATOM   2309  C   GLY C  76      37.348  -0.707 -13.982  1.00 26.23           C  
ANISOU 2309  C   GLY C  76     3306   2488   4172    137   -379    434       C  
ATOM   2310  O   GLY C  76      38.214  -0.598 -13.117  1.00 21.98           O  
ANISOU 2310  O   GLY C  76     2832   1941   3577    130   -268    321       O  
ATOM   2311  N   TYR C  77      36.077  -1.007 -13.728  1.00 31.23           N  
ANISOU 2311  N   TYR C  77     3834   3062   4969    188   -387    438       N  
ATOM   2312  CA  TYR C  77      35.550  -1.188 -12.383  1.00 29.25           C  
ANISOU 2312  CA  TYR C  77     3545   2730   4839    243   -230    314       C  
ATOM   2313  C   TYR C  77      35.466  -2.669 -12.058  1.00 31.56           C  
ANISOU 2313  C   TYR C  77     3861   3120   5009    218   -201    233       C  
ATOM   2314  O   TYR C  77      34.842  -3.437 -12.797  1.00 30.28           O  
ANISOU 2314  O   TYR C  77     3642   3010   4852    190   -308    277       O  
ATOM   2315  CB  TYR C  77      34.165  -0.556 -12.247  1.00 29.23           C  
ANISOU 2315  CB  TYR C  77     3379   2589   5137    317   -221    371       C  
ATOM   2316  CG  TYR C  77      34.153   0.927 -12.484  1.00 27.11           C  
ANISOU 2316  CG  TYR C  77     3078   2167   5056    363   -243    459       C  
ATOM   2317  CD1 TYR C  77      34.385   1.823 -11.442  1.00 29.25           C  
ANISOU 2317  CD1 TYR C  77     3376   2292   5444    405    -79    339       C  
ATOM   2318  CD2 TYR C  77      33.915   1.442 -13.753  1.00 29.01           C  
ANISOU 2318  CD2 TYR C  77     3271   2398   5354    357   -435    664       C  
ATOM   2319  CE1 TYR C  77      34.370   3.194 -11.659  1.00 23.97           C  
ANISOU 2319  CE1 TYR C  77     2682   1446   4980    442    -95    409       C  
ATOM   2320  CE2 TYR C  77      33.899   2.805 -13.977  1.00 32.04           C  
ANISOU 2320  CE2 TYR C  77     3628   2605   5940    401   -461    780       C  
ATOM   2321  CZ  TYR C  77      34.130   3.676 -12.924  1.00 30.84           C  
ANISOU 2321  CZ  TYR C  77     3502   2314   5903    434   -279    631       C  
ATOM   2322  OH  TYR C  77      34.110   5.034 -13.141  1.00 34.12           O  
ANISOU 2322  OH  TYR C  77     3901   2599   6463    449   -287    701       O  
ATOM   2323  N   TYR C  78      36.085  -3.056 -10.948  1.00 29.88           N  
ANISOU 2323  N   TYR C  78     3734   2926   4693    221    -69    119       N  
ATOM   2324  CA  TYR C  78      36.116  -4.431 -10.479  1.00 22.70           C  
ANISOU 2324  CA  TYR C  78     2865   2077   3682    204    -27     66       C  
ATOM   2325  C   TYR C  78      35.241  -4.544  -9.243  1.00 25.53           C  
ANISOU 2325  C   TYR C  78     3177   2374   4149    232    135     25       C  
ATOM   2326  O   TYR C  78      35.386  -3.760  -8.301  1.00 29.11           O  
ANISOU 2326  O   TYR C  78     3660   2791   4609    261    258    -42       O  
ATOM   2327  CB  TYR C  78      37.552  -4.865 -10.170  1.00 20.90           C  
ANISOU 2327  CB  TYR C  78     2767   1934   3239    191    -17      6       C  
ATOM   2328  CG  TYR C  78      38.403  -5.017 -11.414  1.00 23.00           C  
ANISOU 2328  CG  TYR C  78     3066   2286   3388    158   -138     30       C  
ATOM   2329  CD1 TYR C  78      38.922  -3.905 -12.068  1.00 26.43           C  
ANISOU 2329  CD1 TYR C  78     3500   2731   3811    136   -184     78       C  
ATOM   2330  CD2 TYR C  78      38.675  -6.266 -11.939  1.00 21.55           C  
ANISOU 2330  CD2 TYR C  78     2913   2164   3112    144   -189      2       C  
ATOM   2331  CE1 TYR C  78      39.683  -4.040 -13.205  1.00 19.47           C  
ANISOU 2331  CE1 TYR C  78     2648   1953   2797     94   -263    107       C  
ATOM   2332  CE2 TYR C  78      39.438  -6.414 -13.081  1.00 21.51           C  
ANISOU 2332  CE2 TYR C  78     2937   2253   2983    115   -267     -5       C  
ATOM   2333  CZ  TYR C  78      39.942  -5.296 -13.706  1.00 21.08           C  
ANISOU 2333  CZ  TYR C  78     2881   2242   2886     87   -296     53       C  
ATOM   2334  OH  TYR C  78      40.706  -5.434 -14.840  1.00 24.72           O  
ANISOU 2334  OH  TYR C  78     3373   2823   3197     46   -343     52       O  
ATOM   2335  N   ARG C  79      34.321  -5.501  -9.255  1.00 30.69           N  
ANISOU 2335  N   ARG C  79     3755   3019   4886    210    145     53       N  
ATOM   2336  CA  ARG C  79      33.381  -5.687  -8.163  1.00 27.32           C  
ANISOU 2336  CA  ARG C  79     3262   2549   4570    219    323     34       C  
ATOM   2337  C   ARG C  79      33.549  -7.088  -7.601  1.00 28.00           C  
ANISOU 2337  C   ARG C  79     3427   2669   4543    171    376     43       C  
ATOM   2338  O   ARG C  79      33.786  -8.043  -8.348  1.00 32.81           O  
ANISOU 2338  O   ARG C  79     4060   3288   5118    131    252     68       O  
ATOM   2339  CB  ARG C  79      31.926  -5.463  -8.626  1.00 30.39           C  
ANISOU 2339  CB  ARG C  79     3436   2871   5239    227    306     88       C  
ATOM   2340  CG  ARG C  79      30.874  -5.817  -7.577  1.00 31.82           C  
ANISOU 2340  CG  ARG C  79     3513   3022   5555    221    516     72       C  
ATOM   2341  CD  ARG C  79      29.455  -5.431  -7.996  1.00 35.80           C  
ANISOU 2341  CD  ARG C  79     3757   3462   6384    245    506    118       C  
ATOM   2342  NE  ARG C  79      29.313  -3.989  -8.174  1.00 48.13           N  
ANISOU 2342  NE  ARG C  79     5243   4949   8094    345    498    107       N  
ATOM   2343  CZ  ARG C  79      29.138  -3.124  -7.178  1.00 49.42           C  
ANISOU 2343  CZ  ARG C  79     5392   5053   8331    418    715     12       C  
ATOM   2344  NH1 ARG C  79      29.090  -3.550  -5.923  1.00 47.77           N1+
ANISOU 2344  NH1 ARG C  79     5249   4889   8012    393    959    -73       N1+
ATOM   2345  NH2 ARG C  79      29.022  -1.829  -7.437  1.00 45.78           N  
ANISOU 2345  NH2 ARG C  79     4862   4482   8049    512    692      3       N  
ATOM   2346  N   VAL C  80      33.451  -7.207  -6.283  1.00 22.65           N  
ANISOU 2346  N   VAL C  80     2801   2004   3802    174    563     22       N  
ATOM   2347  CA  VAL C  80      33.454  -8.503  -5.624  1.00 32.76           C  
ANISOU 2347  CA  VAL C  80     4152   3296   5000    126    632     77       C  
ATOM   2348  C   VAL C  80      32.196  -8.611  -4.776  1.00 30.88           C  
ANISOU 2348  C   VAL C  80     3807   3032   4892     96    842    103       C  
ATOM   2349  O   VAL C  80      31.808  -7.658  -4.093  1.00 35.29           O  
ANISOU 2349  O   VAL C  80     4328   3607   5475    133    998     37       O  
ATOM   2350  CB  VAL C  80      34.726  -8.734  -4.776  1.00 27.97           C  
ANISOU 2350  CB  VAL C  80     3737   2766   4125    145    646     69       C  
ATOM   2351  CG1 VAL C  80      34.874  -7.675  -3.684  1.00 26.35           C  
ANISOU 2351  CG1 VAL C  80     3587   2622   3802    171    788    -15       C  
ATOM   2352  CG2 VAL C  80      34.718 -10.139  -4.184  1.00 34.75           C  
ANISOU 2352  CG2 VAL C  80     4669   3610   4925    103    691    173       C  
ATOM   2353  N   THR C  81      31.546  -9.767  -4.845  1.00 36.98           N  
ANISOU 2353  N   THR C  81     4523   3757   5770     22    859    187       N  
ATOM   2354  CA  THR C  81      30.357 -10.051  -4.058  1.00 34.31           C  
ANISOU 2354  CA  THR C  81     4068   3401   5566    -33   1078    235       C  
ATOM   2355  C   THR C  81      30.621 -11.275  -3.194  1.00 30.82           C  
ANISOU 2355  C   THR C  81     3766   2961   4984   -102   1174    348       C  
ATOM   2356  O   THR C  81      31.043 -12.319  -3.702  1.00 37.63           O  
ANISOU 2356  O   THR C  81     4691   3754   5851   -140   1032    408       O  
ATOM   2357  CB  THR C  81      29.140 -10.273  -4.962  1.00 36.36           C  
ANISOU 2357  CB  THR C  81     4084   3585   6147    -85   1011    259       C  
ATOM   2358  CG2 THR C  81      27.903 -10.579  -4.135  1.00 40.92           C  
ANISOU 2358  CG2 THR C  81     4504   4150   6895   -152   1260    311       C  
ATOM   2359  OG1 THR C  81      28.905  -9.090  -5.737  1.00 33.99           O  
ANISOU 2359  OG1 THR C  81     3658   3284   5973     -7    904    194       O  
ATOM   2360  N   ALA C  82      30.407 -11.128  -1.888  1.00 29.59           N  
ANISOU 2360  N   ALA C  82     3669   2881   4694   -115   1415    374       N  
ATOM   2361  CA  ALA C  82      30.521 -12.213  -0.926  1.00 30.11           C  
ANISOU 2361  CA  ALA C  82     3867   2959   4613   -190   1535    526       C  
ATOM   2362  C   ALA C  82      29.128 -12.638  -0.483  1.00 38.40           C  
ANISOU 2362  C   ALA C  82     4751   3978   5860   -294   1772    607       C  
ATOM   2363  O   ALA C  82      28.288 -11.789  -0.173  1.00 38.37           O  
ANISOU 2363  O   ALA C  82     4599   4027   5954   -278   1959    520       O  
ATOM   2364  CB  ALA C  82      31.341 -11.785   0.290  1.00 28.71           C  
ANISOU 2364  CB  ALA C  82     3900   2933   4077   -151   1635    516       C  
ATOM   2365  N   THR C  83      28.890 -13.951  -0.440  1.00 39.98           N  
ANISOU 2365  N   THR C  83     4966   4079   6145   -400   1776    773       N  
ATOM   2366  CA  THR C  83      27.573 -14.494  -0.131  1.00 38.34           C  
ANISOU 2366  CA  THR C  83     4577   3821   6170   -531   1989    870       C  
ATOM   2367  C   THR C  83      27.703 -15.752   0.713  1.00 43.92           C  
ANISOU 2367  C   THR C  83     5438   4480   6770   -641   2100   1101       C  
ATOM   2368  O   THR C  83      28.513 -16.628   0.397  1.00 42.01           O  
ANISOU 2368  O   THR C  83     5344   4125   6492   -638   1907   1188       O  
ATOM   2369  CB  THR C  83      26.795 -14.825  -1.414  1.00 41.17           C  
ANISOU 2369  CB  THR C  83     4695   4038   6911   -590   1823    826       C  
ATOM   2370  CG2 THR C  83      25.405 -15.366  -1.085  1.00 43.37           C  
ANISOU 2370  CG2 THR C  83     4744   4266   7469   -742   2042    923       C  
ATOM   2371  OG1 THR C  83      26.674 -13.654  -2.227  1.00 44.63           O  
ANISOU 2371  OG1 THR C  83     4995   4520   7443   -484   1697    655       O  
ATOM   2372  N   ASN C  84      26.908 -15.835   1.775  1.00 48.31           N  
ANISOU 2372  N   ASN C  84     5955   5115   7286   -733   2419   1207       N  
ATOM   2373  CA  ASN C  84      26.677 -17.091   2.481  1.00 49.06           C  
ANISOU 2373  CA  ASN C  84     6136   5167   7337   -855   2485   1429       C  
ATOM   2374  C   ASN C  84      25.174 -17.202   2.735  1.00 51.53           C  
ANISOU 2374  C   ASN C  84     6199   5510   7870   -964   2676   1423       C  
ATOM   2375  O   ASN C  84      24.360 -16.455   2.177  1.00 50.34           O  
ANISOU 2375  O   ASN C  84     5795   5370   7963   -937   2711   1262       O  
ATOM   2376  CB  ASN C  84      27.514 -17.189   3.767  1.00 48.61           C  
ANISOU 2376  CB  ASN C  84     6368   5265   6834   -832   2569   1567       C  
ATOM   2377  CG  ASN C  84      27.145 -16.141   4.809  1.00 50.14           C  
ANISOU 2377  CG  ASN C  84     6568   5713   6772   -808   2834   1461       C  
ATOM   2378  ND2 ASN C  84      28.048 -15.922   5.756  1.00 46.62           N  
ANISOU 2378  ND2 ASN C  84     6377   5437   5898   -765   2846   1506       N  
ATOM   2379  OD1 ASN C  84      26.065 -15.552   4.780  1.00 55.88           O  
ANISOU 2379  OD1 ASN C  84     7068   6484   7681   -824   3005   1329       O  
ATOM   2380  N   THR C  85      24.789 -18.128   3.616  1.00 48.05           N  
ANISOU 2380  N   THR C  85     5822   5087   7346  -1086   2798   1614       N  
ATOM   2381  CA  THR C  85      23.375 -18.384   3.869  1.00 57.58           C  
ANISOU 2381  CA  THR C  85     6796   6314   8770  -1210   2980   1634       C  
ATOM   2382  C   THR C  85      22.693 -17.253   4.634  1.00 57.49           C  
ANISOU 2382  C   THR C  85     6672   6523   8650  -1164   3262   1507       C  
ATOM   2383  O   THR C  85      21.462 -17.170   4.620  1.00 55.18           O  
ANISOU 2383  O   THR C  85     6119   6246   8600  -1225   3400   1462       O  
ATOM   2384  CB  THR C  85      23.207 -19.699   4.638  1.00 68.46           C  
ANISOU 2384  CB  THR C  85     8289   7648  10075  -1369   3042   1892       C  
ATOM   2385  CG2 THR C  85      23.830 -20.850   3.862  1.00 63.04           C  
ANISOU 2385  CG2 THR C  85     7704   6708   9539  -1402   2759   1986       C  
ATOM   2386  OG1 THR C  85      23.848 -19.597   5.916  1.00 74.77           O  
ANISOU 2386  OG1 THR C  85     9341   8634  10434  -1357   3174   2022       O  
ATOM   2387  N   ALA C  86      23.453 -16.386   5.299  1.00 57.02           N  
ANISOU 2387  N   ALA C  86     6797   6630   8238  -1056   3342   1430       N  
ATOM   2388  CA  ALA C  86      22.867 -15.288   6.054  1.00 58.11           C  
ANISOU 2388  CA  ALA C  86     6852   6968   8259  -1000   3600   1265       C  
ATOM   2389  C   ALA C  86      22.735 -14.000   5.247  1.00 57.85           C  
ANISOU 2389  C   ALA C  86     6644   6901   8434   -847   3549    999       C  
ATOM   2390  O   ALA C  86      22.198 -13.017   5.768  1.00 55.18           O  
ANISOU 2390  O   ALA C  86     6215   6687   8064   -779   3743    828       O  
ATOM   2391  CB  ALA C  86      23.691 -15.016   7.317  1.00 54.93           C  
ANISOU 2391  CB  ALA C  86     6747   6786   7337   -980   3708   1294       C  
ATOM   2392  N   GLY C  87      23.207 -13.968   4.008  1.00 54.94           N  
ANISOU 2392  N   GLY C  87     6228   6368   8277   -791   3289    960       N  
ATOM   2393  CA  GLY C  87      23.079 -12.783   3.193  1.00 55.96           C  
ANISOU 2393  CA  GLY C  87     6184   6459   8618   -654   3214    745       C  
ATOM   2394  C   GLY C  87      24.317 -12.560   2.353  1.00 54.81           C  
ANISOU 2394  C   GLY C  87     6178   6234   8413   -578   2970    714       C  
ATOM   2395  O   GLY C  87      25.185 -13.425   2.237  1.00 52.88           O  
ANISOU 2395  O   GLY C  87     6133   5930   8028   -630   2833    859       O  
ATOM   2396  N   SER C  88      24.396 -11.368   1.763  1.00 50.21           N  
ANISOU 2396  N   SER C  88     5486   5641   7951   -447   2910    528       N  
ATOM   2397  CA  SER C  88      25.451 -11.036   0.823  1.00 44.53           C  
ANISOU 2397  CA  SER C  88     4885   4861   7174   -352   2573    463       C  
ATOM   2398  C   SER C  88      25.841  -9.574   0.975  1.00 44.35           C  
ANISOU 2398  C   SER C  88     4901   4899   7050   -203   2595    257       C  
ATOM   2399  O   SER C  88      25.064  -8.745   1.451  1.00 46.49           O  
ANISOU 2399  O   SER C  88     5018   5206   7439   -153   2844    137       O  
ATOM   2400  CB  SER C  88      25.022 -11.300  -0.624  1.00 47.75           C  
ANISOU 2400  CB  SER C  88     5077   5129   7935   -365   2293    475       C  
ATOM   2401  OG  SER C  88      23.960 -10.432  -0.988  1.00 53.04           O  
ANISOU 2401  OG  SER C  88     5439   5783   8932   -308   2361    380       O  
ATOM   2402  N   THR C  89      27.059  -9.267   0.537  1.00 43.11           N  
ANISOU 2402  N   THR C  89     4940   4738   6703   -132   2338    208       N  
ATOM   2403  CA  THR C  89      27.572  -7.906   0.559  1.00 43.38           C  
ANISOU 2403  CA  THR C  89     5028   4794   6662    -10   2313     19       C  
ATOM   2404  C   THR C  89      28.535  -7.741  -0.609  1.00 38.38           C  
ANISOU 2404  C   THR C  89     4462   4091   6029     42   1956     16       C  
ATOM   2405  O   THR C  89      29.174  -8.703  -1.047  1.00 38.33           O  
ANISOU 2405  O   THR C  89     4562   4071   5930     -8   1767    130       O  
ATOM   2406  CB  THR C  89      28.265  -7.587   1.889  1.00 48.89           C  
ANISOU 2406  CB  THR C  89     5975   5639   6963    -10   2492    -64       C  
ATOM   2407  CG2 THR C  89      29.508  -8.452   2.070  1.00 50.62           C  
ANISOU 2407  CG2 THR C  89     6458   5919   6856    -58   2305     63       C  
ATOM   2408  OG1 THR C  89      28.650  -6.208   1.912  1.00 53.80           O  
ANISOU 2408  OG1 THR C  89     6624   6251   7567     94   2484   -280       O  
ATOM   2409  N   SER C  90      28.632  -6.515  -1.113  1.00 32.89           N  
ANISOU 2409  N   SER C  90     3701   3344   5453    143   1880   -113       N  
ATOM   2410  CA  SER C  90      29.386  -6.255  -2.325  1.00 33.40           C  
ANISOU 2410  CA  SER C  90     3794   3348   5550    182   1568   -100       C  
ATOM   2411  C   SER C  90      30.102  -4.919  -2.205  1.00 30.90           C  
ANISOU 2411  C   SER C  90     3567   3018   5156    266   1549   -246       C  
ATOM   2412  O   SER C  90      29.668  -4.027  -1.473  1.00 38.32           O  
ANISOU 2412  O   SER C  90     4466   3942   6151    317   1759   -381       O  
ATOM   2413  CB  SER C  90      28.468  -6.257  -3.555  1.00 38.92           C  
ANISOU 2413  CB  SER C  90     4241   3951   6594    192   1419    -34       C  
ATOM   2414  OG  SER C  90      29.217  -6.362  -4.754  1.00 44.53           O  
ANISOU 2414  OG  SER C  90     5013   4642   7266    192   1120     11       O  
ATOM   2415  N   CYS C  91      31.214  -4.794  -2.922  1.00 28.87           N  
ANISOU 2415  N   CYS C  91     3427   2758   4783    272   1311   -232       N  
ATOM   2416  CA  CYS C  91      31.898  -3.516  -3.045  1.00 27.47           C  
ANISOU 2416  CA  CYS C  91     3309   2537   4593    331   1256   -347       C  
ATOM   2417  C   CYS C  91      32.659  -3.500  -4.359  1.00 30.76           C  
ANISOU 2417  C   CYS C  91     3743   2927   5019    328    977   -264       C  
ATOM   2418  O   CYS C  91      32.895  -4.543  -4.978  1.00 30.80           O  
ANISOU 2418  O   CYS C  91     3766   2975   4960    282    840   -159       O  
ATOM   2419  CB  CYS C  91      32.847  -3.261  -1.870  1.00 31.98           C  
ANISOU 2419  CB  CYS C  91     4092   3205   4856    308   1352   -473       C  
ATOM   2420  SG  CYS C  91      34.333  -4.287  -1.895  1.00 35.03           S  
ANISOU 2420  SG  CYS C  91     4679   3719   4913    247   1156   -382       S  
ATOM   2421  N   GLN C  92      33.042  -2.300  -4.786  1.00 30.46           N  
ANISOU 2421  N   GLN C  92     3702   2808   5065    372    907   -317       N  
ATOM   2422  CA  GLN C  92      33.752  -2.151  -6.044  1.00 29.72           C  
ANISOU 2422  CA  GLN C  92     3623   2702   4966    359    672   -228       C  
ATOM   2423  C   GLN C  92      34.803  -1.060  -5.923  1.00 29.51           C  
ANISOU 2423  C   GLN C  92     3703   2639   4870    359    645   -314       C  
ATOM   2424  O   GLN C  92      34.775  -0.224  -5.014  1.00 30.24           O  
ANISOU 2424  O   GLN C  92     3828   2673   4989    382    790   -458       O  
ATOM   2425  CB  GLN C  92      32.798  -1.840  -7.209  1.00 34.06           C  
ANISOU 2425  CB  GLN C  92     3988   3163   5791    396    553   -111       C  
ATOM   2426  CG  GLN C  92      32.283  -0.412  -7.244  1.00 44.37           C  
ANISOU 2426  CG  GLN C  92     5189   4308   7360    479    599   -139       C  
ATOM   2427  CD  GLN C  92      31.722  -0.015  -8.604  1.00 47.14           C  
ANISOU 2427  CD  GLN C  92     5394   4588   7928    512    396     29       C  
ATOM   2428  NE2 GLN C  92      31.773   1.275  -8.905  1.00 54.99           N  
ANISOU 2428  NE2 GLN C  92     6360   5440   9092    569    361     55       N  
ATOM   2429  OE1 GLN C  92      31.262  -0.857  -9.376  1.00 45.83           O  
ANISOU 2429  OE1 GLN C  92     5150   4498   7763    476    260    138       O  
ATOM   2430  N   ALA C  93      35.739  -1.093  -6.866  1.00 23.70           N  
ANISOU 2430  N   ALA C  93     3018   1941   4046    322    466   -238       N  
ATOM   2431  CA  ALA C  93      36.775  -0.084  -6.991  1.00 27.54           C  
ANISOU 2431  CA  ALA C  93     3577   2387   4499    297    415   -285       C  
ATOM   2432  C   ALA C  93      37.191  -0.006  -8.454  1.00 31.87           C  
ANISOU 2432  C   ALA C  93     4099   2945   5063    269    233   -134       C  
ATOM   2433  O   ALA C  93      36.843  -0.865  -9.271  1.00 21.99           O  
ANISOU 2433  O   ALA C  93     2806   1765   3786    263    139    -30       O  
ATOM   2434  CB  ALA C  93      37.974  -0.395  -6.087  1.00 20.20           C  
ANISOU 2434  CB  ALA C  93     2789   1578   3308    244    439   -396       C  
ATOM   2435  N   HIS C  94      37.956   1.030  -8.774  1.00 28.12           N  
ANISOU 2435  N   HIS C  94     3659   2405   4623    236    190   -130       N  
ATOM   2436  CA  HIS C  94      38.382   1.295 -10.137  1.00 23.12           C  
ANISOU 2436  CA  HIS C  94     3011   1785   3989    195     45     29       C  
ATOM   2437  C   HIS C  94      39.868   1.015 -10.288  1.00 28.16           C  
ANISOU 2437  C   HIS C  94     3735   2557   4408    114      7      1       C  
ATOM   2438  O   HIS C  94      40.653   1.264  -9.368  1.00 24.58           O  
ANISOU 2438  O   HIS C  94     3338   2114   3888     82     67   -132       O  
ATOM   2439  CB  HIS C  94      38.099   2.743 -10.536  1.00 22.98           C  
ANISOU 2439  CB  HIS C  94     2948   1567   4217    209     27    107       C  
ATOM   2440  CG  HIS C  94      38.419   3.042 -11.966  1.00 24.73           C  
ANISOU 2440  CG  HIS C  94     3162   1813   4421    159   -119    317       C  
ATOM   2441  CD2 HIS C  94      37.705   2.837 -13.097  1.00 22.18           C  
ANISOU 2441  CD2 HIS C  94     2777   1525   4125    177   -251    504       C  
ATOM   2442  ND1 HIS C  94      39.612   3.611 -12.362  1.00 20.95           N  
ANISOU 2442  ND1 HIS C  94     2749   1348   3866     64   -142    358       N  
ATOM   2443  CE1 HIS C  94      39.615   3.749 -13.677  1.00 25.34           C  
ANISOU 2443  CE1 HIS C  94     3293   1948   4386     27   -260    571       C  
ATOM   2444  NE2 HIS C  94      38.468   3.290 -14.146  1.00 25.89           N  
ANISOU 2444  NE2 HIS C  94     3294   2038   4504     96   -341    660       N  
ATOM   2445  N   LEU C  95      40.245   0.501 -11.453  1.00 27.68           N  
ANISOU 2445  N   LEU C  95     3673   2612   4234     78    -94    116       N  
ATOM   2446  CA  LEU C  95      41.638   0.390 -11.856  1.00 27.13           C  
ANISOU 2446  CA  LEU C  95     3644   2663   3999      3   -119    112       C  
ATOM   2447  C   LEU C  95      41.862   1.272 -13.076  1.00 24.78           C  
ANISOU 2447  C   LEU C  95     3334   2339   3744    -60   -182    278       C  
ATOM   2448  O   LEU C  95      41.117   1.184 -14.058  1.00 28.98           O  
ANISOU 2448  O   LEU C  95     3842   2883   4287    -48   -263    418       O  
ATOM   2449  CB  LEU C  95      42.013  -1.058 -12.175  1.00 20.26           C  
ANISOU 2449  CB  LEU C  95     2791   1967   2939     15   -146     84       C  
ATOM   2450  CG  LEU C  95      43.349  -1.195 -12.914  1.00 19.74           C  
ANISOU 2450  CG  LEU C  95     2733   2040   2728    -49   -163     97       C  
ATOM   2451  CD1 LEU C  95      44.519  -0.823 -11.998  1.00 18.48           C  
ANISOU 2451  CD1 LEU C  95     2572   1898   2553    -83   -118     -4       C  
ATOM   2452  CD2 LEU C  95      43.515  -2.604 -13.472  1.00 20.26           C  
ANISOU 2452  CD2 LEU C  95     2808   2243   2648    -19   -186     64       C  
ATOM   2453  N   GLN C  96      42.874   2.125 -13.013  1.00 21.12           N  
ANISOU 2453  N   GLN C  96     2882   1842   3299   -141   -154    274       N  
ATOM   2454  CA  GLN C  96      43.279   2.932 -14.158  1.00 28.16           C  
ANISOU 2454  CA  GLN C  96     3771   2722   4206   -227   -193    457       C  
ATOM   2455  C   GLN C  96      44.647   2.448 -14.616  1.00 31.31           C  
ANISOU 2455  C   GLN C  96     4171   3322   4404   -312   -166    436       C  
ATOM   2456  O   GLN C  96      45.622   2.551 -13.872  1.00 27.80           O  
ANISOU 2456  O   GLN C  96     3708   2897   3957   -355   -116    309       O  
ATOM   2457  CB  GLN C  96      43.330   4.416 -13.809  1.00 25.88           C  
ANISOU 2457  CB  GLN C  96     3479   2197   4159   -272   -165    491       C  
ATOM   2458  CG  GLN C  96      43.664   5.298 -14.998  1.00 30.29           C  
ANISOU 2458  CG  GLN C  96     4040   2712   4756   -370   -205    732       C  
ATOM   2459  CD  GLN C  96      42.627   5.181 -16.101  1.00 33.33           C  
ANISOU 2459  CD  GLN C  96     4423   3119   5122   -319   -313    955       C  
ATOM   2460  NE2 GLN C  96      43.042   4.680 -17.262  1.00 31.27           N  
ANISOU 2460  NE2 GLN C  96     4189   3076   4615   -387   -353   1083       N  
ATOM   2461  OE1 GLN C  96      41.463   5.533 -15.908  1.00 24.73           O  
ANISOU 2461  OE1 GLN C  96     3299   1864   4234   -221   -360   1001       O  
ATOM   2462  N   VAL C  97      44.724   1.924 -15.829  1.00 31.11           N  
ANISOU 2462  N   VAL C  97     4156   3456   4210   -337   -198    546       N  
ATOM   2463  CA  VAL C  97      46.012   1.614 -16.437  1.00 20.31           C  
ANISOU 2463  CA  VAL C  97     2771   2277   2670   -421   -140    539       C  
ATOM   2464  C   VAL C  97      46.528   2.869 -17.136  1.00 22.25           C  
ANISOU 2464  C   VAL C  97     3011   2471   2971   -554   -116    726       C  
ATOM   2465  O   VAL C  97      45.765   3.585 -17.793  1.00 32.81           O  
ANISOU 2465  O   VAL C  97     4386   3709   4372   -571   -179    926       O  
ATOM   2466  CB  VAL C  97      45.889   0.433 -17.409  1.00 27.54           C  
ANISOU 2466  CB  VAL C  97     3711   3395   3357   -392   -158    532       C  
ATOM   2467  CG1 VAL C  97      47.221   0.168 -18.094  1.00 30.90           C  
ANISOU 2467  CG1 VAL C  97     4104   4020   3615   -471    -61    511       C  
ATOM   2468  CG2 VAL C  97      45.432  -0.810 -16.649  1.00 21.26           C  
ANISOU 2468  CG2 VAL C  97     2918   2607   2552   -274   -175    357       C  
ATOM   2469  N   GLU C  98      47.817   3.156 -16.967  1.00 22.83           N  
ANISOU 2469  N   GLU C  98     3028   2601   3044   -651    -32    677       N  
ATOM   2470  CA  GLU C  98      48.438   4.361 -17.496  1.00 29.06           C  
ANISOU 2470  CA  GLU C  98     3799   3322   3919   -805     13    848       C  
ATOM   2471  C   GLU C  98      49.656   4.010 -18.338  1.00 32.10           C  
ANISOU 2471  C   GLU C  98     4126   3954   4115   -910    121    877       C  
ATOM   2472  O   GLU C  98      50.257   2.945 -18.183  1.00 37.26           O  
ANISOU 2472  O   GLU C  98     4723   4792   4640   -855    167    705       O  
ATOM   2473  CB  GLU C  98      48.861   5.308 -16.368  1.00 34.48           C  
ANISOU 2473  CB  GLU C  98     4445   3799   4858   -863     27    748       C  
ATOM   2474  CG  GLU C  98      47.699   5.823 -15.554  1.00 45.24           C  
ANISOU 2474  CG  GLU C  98     5861   4903   6425   -768    -37    705       C  
ATOM   2475  CD  GLU C  98      48.139   6.598 -14.335  1.00 52.08           C  
ANISOU 2475  CD  GLU C  98     6703   5590   7496   -822    -17    530       C  
ATOM   2476  OE1 GLU C  98      49.363   6.668 -14.079  1.00 48.40           O  
ANISOU 2476  OE1 GLU C  98     6167   5212   7011   -936     20    442       O  
ATOM   2477  OE2 GLU C  98      47.254   7.120 -13.621  1.00 59.13           O1-
ANISOU 2477  OE2 GLU C  98     7638   6261   8569   -750    -36    461       O1-
ATOM   2478  N   ARG C  99      50.032   4.933 -19.221  1.00 35.05           N  
ANISOU 2478  N   ARG C  99     4505   4319   4492  -1061    173   1104       N  
ATOM   2479  CA  ARG C  99      51.198   4.741 -20.078  1.00 39.29           C  
ANISOU 2479  CA  ARG C  99     4976   5098   4856  -1183    315   1151       C  
ATOM   2480  C   ARG C  99      52.383   5.553 -19.575  1.00 40.90           C  
ANISOU 2480  C   ARG C  99     5052   5232   5257  -1335    402   1128       C  
ATOM   2481  O   ARG C  99      52.226   6.707 -19.184  1.00 45.58           O  
ANISOU 2481  O   ARG C  99     5660   5566   6091  -1419    363   1222       O  
ATOM   2482  CB  ARG C  99      50.875   5.127 -21.521  1.00 51.89           C  
ANISOU 2482  CB  ARG C  99     6667   6789   6261  -1276    335   1444       C  
ATOM   2483  CG  ARG C  99      49.406   5.007 -21.874  1.00 63.01           C  
ANISOU 2483  CG  ARG C  99     8203   8126   7610  -1166    172   1556       C  
ATOM   2484  CD  ARG C  99      49.177   5.148 -23.373  1.00 75.71           C  
ANISOU 2484  CD  ARG C  99     9911   9915   8942  -1256    170   1828       C  
ATOM   2485  NE  ARG C  99      47.987   5.943 -23.671  1.00 80.41           N  
ANISOU 2485  NE  ARG C  99    10594  10317   9642  -1232     -4   2095       N  
ATOM   2486  CZ  ARG C  99      46.761   5.438 -23.787  1.00 73.21           C  
ANISOU 2486  CZ  ARG C  99     9735   9403   8678  -1101   -173   2088       C  
ATOM   2487  NH1 ARG C  99      46.561   4.135 -23.630  1.00 65.33           N1+
ANISOU 2487  NH1 ARG C  99     8732   8570   7520   -999   -182   1824       N1+
ATOM   2488  NH2 ARG C  99      45.736   6.235 -24.059  1.00 73.96           N  
ANISOU 2488  NH2 ARG C  99     9874   9316   8910  -1074   -336   2349       N  
HETATM 2489  O1  SO4 C 197      52.924 -15.898 -11.030  1.00 93.83           O  
HETATM 2490  O2  SO4 C 197      52.703 -18.282 -10.953  1.00 83.28           O  
HETATM 2491  O3  SO4 C 197      54.466 -17.208  -9.771  1.00 98.77           O1-
HETATM 2492  O4  SO4 C 197      52.210 -16.968  -9.026  1.00100.43           O  
HETATM 2493  S   SO4 C 197      53.074 -17.089 -10.197  1.00 94.39           S  
HETATM 2494  O   HOH C 297      50.953 -19.212 -11.899  1.00 47.07           O  
HETATM 2495  O   HOH C 298      52.023 -13.741 -10.594  1.00 64.27           O  
HETATM 2496  O   HOH C 299      55.771  -1.326 -17.910  1.00 37.64           O  
HETATM 2497  O   HOH C 300      29.094 -14.008  -3.819  1.00 45.10           O  
HETATM 2498  O   HOH C 301      41.488   4.074 -10.648  1.00 23.32           O  
HETATM 2499  O   HOH C 302      40.206   3.909  -3.138  1.00 39.99           O  
HETATM 2500  O   HOH C 303      35.351  -0.608  -2.273  1.00 28.20           O  
HETATM 2501  O   HOH C 304      41.939  -2.750  -0.184  1.00 38.64           O  
HETATM 2502  O   HOH C 305      38.261  -1.076   3.882  1.00 43.89           O  
HETATM 2503  O   HOH C 306      30.367  -9.409  -7.897  1.00 38.95           O  
HETATM 2504  O   HOH C 307      42.963 -16.245 -14.592  1.00 25.68           O  
HETATM 2505  O   HOH C 308      50.750   0.773  -9.040  1.00 20.24           O  
HETATM 2506  O   HOH C 309      54.216  -7.111 -14.274  1.00 31.82           O  
HETATM 2507  O   HOH C 310      46.630  -8.413 -18.196  1.00 37.75           O  
HETATM 2508  O   HOH C 311      44.890   0.758  -4.163  1.00 34.54           O  
HETATM 2509  O   HOH C 312      39.319   5.787 -17.577  1.00 40.93           O  
HETATM 2510  O   HOH C 313      44.729  -5.129   6.231  1.00 64.65           O  
HETATM 2511  O   HOH C 314      54.843  -4.593 -11.279  1.00 26.65           O  
HETATM 2512  O   HOH C 315      27.062  -9.583 -21.546  1.00 31.62           O  
HETATM 2513  O   HOH C 316      43.348   2.332 -20.215  1.00 44.81           O  
HETATM 2514  O   HOH C 317      45.836 -11.918 -20.630  1.00 44.29           O  
HETATM 2515  O   HOH C 318      30.586  -5.214   4.646  1.00 46.77           O  
HETATM 2516  O   HOH C 319      48.522  -9.215 -19.836  1.00 37.48           O  
HETATM 2517  O   HOH C 320      48.857 -12.513 -11.827  1.00 34.23           O  
HETATM 2518  O   HOH C 321      51.663  -4.942 -20.815  1.00 50.90           O  
HETATM 2519  O   HOH C 322      31.727  -0.072  -3.599  1.00 39.96           O  
HETATM 2520  O   HOH C 323      34.162 -14.806 -10.159  1.00 34.82           O  
HETATM 2521  O   HOH C 324      52.862 -11.729 -20.334  1.00 55.54           O  
HETATM 2522  O   HOH C 325      39.403 -18.911 -19.496  1.00 46.67           O  
HETATM 2523  O   HOH C 326      40.151  -9.811 -17.453  1.00 40.31           O  
HETATM 2524  O   HOH C 327      35.466   3.271  -7.976  1.00 48.99           O  
HETATM 2525  O   HOH C 328      42.162  -3.019  -2.913  1.00 26.73           O  
HETATM 2526  O   HOH C 329      35.277 -18.022  -3.115  1.00 48.63           O  
HETATM 2527  O   HOH C 330      40.392  -7.559 -17.681  1.00 58.42           O  
HETATM 2528  O   HOH C 331      36.820   3.247 -16.699  1.00 37.29           O  
HETATM 2529  O   HOH C 332      36.400   0.039 -18.822  1.00 61.39           O  
HETATM 2530  O   HOH C 333      26.784 -20.385   2.776  1.00 53.01           O  
HETATM 2531  O   HOH C 334      34.978   1.333 -17.174  1.00 44.73           O  
HETATM 2532  O   HOH C 335      21.970  -9.446   2.603  1.00 59.79           O  
HETATM 2533  O   HOH C 336      28.757  -0.524  -4.452  1.00 66.85           O  
HETATM 2534  O   HOH C 337      26.120  -4.283  -0.575  1.00 46.59           O  
HETATM 2535  O   HOH C 338      37.284 -16.529  -4.845  1.00 29.97           O  
HETATM 2536  O   HOH C 339      40.662 -18.925  -4.532  1.00 37.25           O  
HETATM 2537  O   HOH C 340      45.171   1.478  -1.427  1.00 50.43           O  
ATOM   2538  N   THR D   4      86.194 -12.722 -26.444  1.00 88.82           N  
ANISOU 2538  N   THR D   4     8731  12211  12804   2550   3433   2032       N  
ATOM   2539  CA  THR D   4      85.920 -11.736 -25.403  1.00 87.42           C  
ANISOU 2539  CA  THR D   4     8391  11955  12868   2290   3161   2162       C  
ATOM   2540  C   THR D   4      85.311 -10.461 -25.983  1.00 83.06           C  
ANISOU 2540  C   THR D   4     7904  11480  12173   2154   3216   2308       C  
ATOM   2541  O   THR D   4      85.899  -9.826 -26.856  1.00 83.59           O  
ANISOU 2541  O   THR D   4     7896  11638  12227   2168   3436   2510       O  
ATOM   2542  CB  THR D   4      87.200 -11.378 -24.626  1.00 92.55           C  
ANISOU 2542  CB  THR D   4     8653  12557  13956   2172   3055   2352       C  
ATOM   2543  CG2 THR D   4      86.952 -10.200 -23.697  1.00 89.12           C  
ANISOU 2543  CG2 THR D   4     8052  12053  13758   1879   2779   2448       C  
ATOM   2544  OG1 THR D   4      87.624 -12.510 -23.856  1.00 97.38           O  
ANISOU 2544  OG1 THR D   4     9208  13096  14697   2287   2933   2238       O  
ATOM   2545  N   LEU D   5      84.131 -10.084 -25.489  1.00 76.33           N  
ANISOU 2545  N   LEU D   5     7192  10584  11227   2033   3022   2224       N  
ATOM   2546  CA  LEU D   5      83.412  -8.927 -26.001  1.00 75.42           C  
ANISOU 2546  CA  LEU D   5     7170  10530  10957   1918   3061   2359       C  
ATOM   2547  C   LEU D   5      82.915  -8.062 -24.849  1.00 69.11           C  
ANISOU 2547  C   LEU D   5     6272   9577  10409   1640   2748   2390       C  
ATOM   2548  O   LEU D   5      82.593  -8.557 -23.763  1.00 65.51           O  
ANISOU 2548  O   LEU D   5     5873   8994  10025   1554   2429   2191       O  
ATOM   2549  CB  LEU D   5      82.235  -9.352 -26.909  1.00 76.98           C  
ANISOU 2549  CB  LEU D   5     7744  10876  10629   2082   3156   2172       C  
ATOM   2550  CG  LEU D   5      81.078 -10.180 -26.337  1.00 79.03           C  
ANISOU 2550  CG  LEU D   5     8312  11027  10688   2048   2853   1810       C  
ATOM   2551  CD1 LEU D   5      79.988  -9.292 -25.730  1.00 84.05           C  
ANISOU 2551  CD1 LEU D   5     9073  11567  11294   1796   2543   1801       C  
ATOM   2552  CD2 LEU D   5      80.505 -11.118 -27.393  1.00 74.54           C  
ANISOU 2552  CD2 LEU D   5     8044  10609   9670   2280   3007   1542       C  
ATOM   2553  N   ARG D   6      82.853  -6.761 -25.109  1.00 66.94           N  
ANISOU 2553  N   ARG D   6     5909   9285  10240   1485   2806   2617       N  
ATOM   2554  CA  ARG D   6      82.420  -5.803 -24.104  1.00 71.28           C  
ANISOU 2554  CA  ARG D   6     6399   9653  11031   1195   2500   2614       C  
ATOM   2555  C   ARG D   6      80.952  -6.036 -23.748  1.00 64.34           C  
ANISOU 2555  C   ARG D   6     5907   8726   9813   1149   2219   2356       C  
ATOM   2556  O   ARG D   6      80.149  -6.371 -24.623  1.00 65.37           O  
ANISOU 2556  O   ARG D   6     6325   8981   9531   1295   2324   2285       O  
ATOM   2557  CB  ARG D   6      82.629  -4.381 -24.632  1.00 82.07           C  
ANISOU 2557  CB  ARG D   6     7645  10962  12577   1064   2660   2905       C  
ATOM   2558  CG  ARG D   6      82.292  -3.254 -23.668  1.00 84.84           C  
ANISOU 2558  CG  ARG D   6     7886  11095  13256    763   2408   2911       C  
ATOM   2559  CD  ARG D   6      83.065  -1.978 -23.998  1.00 88.05           C  
ANISOU 2559  CD  ARG D   6     8116  11343  13995    625   2519   3140       C  
ATOM   2560  NE  ARG D   6      82.883  -1.549 -25.384  1.00 89.96           N  
ANISOU 2560  NE  ARG D   6     8520  11676  13985    791   2831   3382       N  
ATOM   2561  CZ  ARG D   6      83.814  -1.651 -26.329  1.00 93.94           C  
ANISOU 2561  CZ  ARG D   6     8946  12275  14472    948   3106   3564       C  
ATOM   2562  NH1 ARG D   6      85.001  -2.173 -26.042  1.00 93.43           N1+
ANISOU 2562  NH1 ARG D   6     8640  12215  14646    949   3123   3533       N1+
ATOM   2563  NH2 ARG D   6      83.558  -1.229 -27.562  1.00 97.24           N  
ANISOU 2563  NH2 ARG D   6     9523  12799  14626   1118   3357   3781       N  
ATOM   2564  N   PRO D   7      80.576  -5.889 -22.477  1.00 57.16           N  
ANISOU 2564  N   PRO D   7     5001   7662   9058    958   1861   2202       N  
ATOM   2565  CA  PRO D   7      79.166  -6.047 -22.103  1.00 54.91           C  
ANISOU 2565  CA  PRO D   7     5053   7325   8484    907   1616   1983       C  
ATOM   2566  C   PRO D   7      78.293  -5.040 -22.831  1.00 52.99           C  
ANISOU 2566  C   PRO D   7     4965   7101   8068    862   1696   2099       C  
ATOM   2567  O   PRO D   7      78.702  -3.912 -23.101  1.00 56.15           O
[truncated: 126,355 more chars]
