# Supplementary material
Source: publisher figshare collection journal article supplement (https://plos.figshare.com/articles/dataset/_/11411415)
Supplement: Supplementary file 1 [file 1 › pone.0226693.s016.pdb]

HEADER    TRANSFERASE                             11-FEB-11   3QP3              
TITLE     CRYSTAL STRUCTURE OF TITIN DOMAIN M4, TETRAGONAL FORM                 
COMPND    MOL_ID: 1;                                                            
COMPND   2 MOLECULE: TITIN;                                                     
COMPND   3 CHAIN: A, B, C;                                                      
COMPND   4 FRAGMENT: DOMAIN M4 (UNP RESIDUES 33294-33395);                      
COMPND   5 SYNONYM: CONNECTIN, RHABDOMYOSARCOMA ANTIGEN MU-RMS-40.14;           
COMPND   6 EC: 2.7.11.1;                                                        
COMPND   7 ENGINEERED: YES                                                      
SOURCE    MOL_ID: 1;                                                            
SOURCE   2 ORGANISM_SCIENTIFIC: HOMO SAPIENS;                                   
SOURCE   3 ORGANISM_COMMON: HUMAN;                                              
SOURCE   4 ORGANISM_TAXID: 9606;                                                
SOURCE   5 GENE: TTN;                                                           
SOURCE   6 EXPRESSION_SYSTEM: ESCHERICHIA COLI;                                 
SOURCE   7 EXPRESSION_SYSTEM_TAXID: 562;                                        
SOURCE   8 EXPRESSION_SYSTEM_STRAIN: BL21STAR PRARE2;                           
SOURCE   9 EXPRESSION_SYSTEM_VECTOR_TYPE: PLASMID;                              
SOURCE  10 EXPRESSION_SYSTEM_PLASMID: PETM-14                                   
KEYWDS    I-SET IG-LIKE, SARCOMERE, M-BAND, TRANSFERASE                         
EXPDTA    X-RAY DIFFRACTION                                                     
AUTHOR    F.SAUER,A.KOLODZIEJCZYK,M.WILMANNS                                    
REVDAT   1   15-FEB-12 3QP3    0                                                
JRNL        AUTH   F.SAUER,A.KOLODZIEJCZYK,M.WILMANNS                           
JRNL        TITL   CRYSTAL STRUCTURE OF TITIN DOMAIN M4, TETRAGONAL FORM        
JRNL        REF    TO BE PUBLISHED                                              
JRNL        REFN                                                                
REMARK   2                                                                      
REMARK   2 RESOLUTION.    2.00 ANGSTROMS.                                       
REMARK   3                                                                      
REMARK   3 REFINEMENT.                                                          
REMARK   3   PROGRAM     : PHENIX (PHENIX.REFINE: 1.6.4_486)                    
REMARK   3   AUTHORS     : PAUL ADAMS,PAVEL AFONINE,VICENT CHEN,IAN             
REMARK   3               : DAVIS,KRESHNA GOPAL,RALF GROSSE-                     
REMARK   3               : KUNSTLEVE,LI-WEI HUNG,ROBERT IMMORMINO,              
REMARK   3               : TOM IOERGER,AIRLIE MCCOY,ERIK MCKEE,NIGEL            
REMARK   3               : MORIARTY,REETAL PAI,RANDY READ,JANE                  
REMARK   3               : RICHARDSON,DAVID RICHARDSON,TOD ROMO,JIM             
REMARK   3               : SACCHETTINI,NICHOLAS SAUTER,JACOB SMITH,             
REMARK   3               : LAURENT STORONI,TOM TERWILLIGER,PETER                
REMARK   3               : ZWART                                                
REMARK   3                                                                      
REMARK   3    REFINEMENT TARGET : ML                                            
REMARK   3                                                                      
REMARK   3  DATA USED IN REFINEMENT.                                            
REMARK   3   RESOLUTION RANGE HIGH (ANGSTROMS) : 2.00                           
REMARK   3   RESOLUTION RANGE LOW  (ANGSTROMS) : 48.60                          
REMARK   3   MIN(FOBS/SIGMA_FOBS)              : 1.360                          
REMARK   3   COMPLETENESS FOR RANGE        (%) : 99.4                           
REMARK   3   NUMBER OF REFLECTIONS             : 21659                          
REMARK   3                                                                      
REMARK   3  FIT TO DATA USED IN REFINEMENT.                                     
REMARK   3   R VALUE     (WORKING + TEST SET) : 0.179                           
REMARK   3   R VALUE            (WORKING SET) : 0.177                           
REMARK   3   FREE R VALUE                     : 0.213                           
REMARK   3   FREE R VALUE TEST SET SIZE   (%) : 5.080                           
REMARK   3   FREE R VALUE TEST SET COUNT      : 1100                            
REMARK   3                                                                      
REMARK   3  FIT TO DATA USED IN REFINEMENT (IN BINS).                           
REMARK   3   BIN  RESOLUTION RANGE  COMPL.    NWORK NFREE   RWORK  RFREE        
REMARK   3     1 48.6116 -  3.9934    0.98     2698   165  0.1790 0.1897        
REMARK   3     2  3.9934 -  3.1699    1.00     2655   110  0.1580 0.1946        
REMARK   3     3  3.1699 -  2.7692    1.00     2550   165  0.1805 0.2266        
REMARK   3     4  2.7692 -  2.5161    1.00     2594   110  0.1802 0.2370        
REMARK   3     5  2.5161 -  2.3357    1.00     2520   165  0.1928 0.2408        
REMARK   3     6  2.3357 -  2.1980    1.00     2554   110  0.1772 0.2254        
REMARK   3     7  2.1980 -  2.0879    1.00     2501   165  0.1814 0.2245        
REMARK   3     8  2.0879 -  1.9970    0.98     2487   110  0.1985 0.2194        
REMARK   3                                                                      
REMARK   3  BULK SOLVENT MODELLING.                                             
REMARK   3   METHOD USED        : FLAT BULK SOLVENT MODEL                       
REMARK   3   SOLVENT RADIUS     : 1.00                                          
REMARK   3   SHRINKAGE RADIUS   : 0.72                                          
REMARK   3   K_SOL              : 0.38                                          
REMARK   3   B_SOL              : 45.57                                         
REMARK   3                                                                      
REMARK   3  ERROR ESTIMATES.                                                    
REMARK   3   COORDINATE ERROR (MAXIMUM-LIKELIHOOD BASED)     : 0.250            
REMARK   3   PHASE ERROR (DEGREES, MAXIMUM-LIKELIHOOD BASED) : NULL             
REMARK   3                                                                      
REMARK   3  B VALUES.                                                           
REMARK   3   FROM WILSON PLOT           (A**2) : 21.15                          
REMARK   3   MEAN B VALUE      (OVERALL, A**2) : 24.20                          
REMARK   3   OVERALL ANISOTROPIC B VALUE.                                       
REMARK   3    B11 (A**2) : -0.89070                                             
REMARK   3    B22 (A**2) : -0.89070                                             
REMARK   3    B33 (A**2) : 1.78140                                              
REMARK   3    B12 (A**2) : -0.00000                                             
REMARK   3    B13 (A**2) : 0.00000                                              
REMARK   3    B23 (A**2) : -0.00000                                             
REMARK   3                                                                      
REMARK   3  TWINNING INFORMATION.                                               
REMARK   3   FRACTION: NULL                                                     
REMARK   3   OPERATOR: NULL                                                     
REMARK   3                                                                      
REMARK   3  DEVIATIONS FROM IDEAL VALUES.                                       
REMARK   3                 RMSD          COUNT                                  
REMARK   3   BOND      :  0.007           2392                                  
REMARK   3   ANGLE     :  1.044           3273                                  
REMARK   3   CHIRALITY :  0.073            373                                  
REMARK   3   PLANARITY :  0.004            420                                  
REMARK   3   DIHEDRAL  : 11.554            832                                  
REMARK   3                                                                      
REMARK   3  TLS DETAILS                                                         
REMARK   3   NUMBER OF TLS GROUPS  : 12                                         
REMARK   3   TLS GROUP : 1                                                      
REMARK   3    SELECTION: (chain A and resid 5:15)                               
REMARK   3    ORIGIN FOR THE GROUP (A):  15.6496   3.8330   9.8351              
REMARK   3    T TENSOR                                                          
REMARK   3      T11:   0.0816 T22:   0.2112                                     
REMARK   3      T33:   0.3017 T12:  -0.0936                                     
REMARK   3      T13:   0.0227 T23:   0.0141                                     
REMARK   3    L TENSOR                                                          
REMARK   3      L11:   1.0373 L22:   2.3775                                     
REMARK   3      L33:   1.6439 L12:   0.7165                                     
REMARK   3      L13:  -0.7221 L23:  -0.2383                                     
REMARK   3    S TENSOR                                                          
REMARK   3      S11:  -0.0375 S12:  -0.0641 S13:  -0.6556                       
REMARK   3      S21:   0.1618 S22:  -0.0193 S23:  -0.2590                       
REMARK   3      S31:  -0.0839 S32:   0.4514 S33:   0.1780                       
REMARK   3   TLS GROUP : 2                                                      
REMARK   3    SELECTION: (chain A and resid 16:31)                              
REMARK   3    ORIGIN FOR THE GROUP (A):  -0.4453  16.0384   2.5739              
REMARK   3    T TENSOR                                                          
REMARK   3      T11:   0.2380 T22:   0.1356                                     
REMARK   3      T33:   0.2504 T12:  -0.0709                                     
REMARK   3      T13:   0.0176 T23:   0.0798                                     
REMARK   3    L TENSOR                                                          
REMARK   3      L11:   2.1959 L22:   1.2023                                     
REMARK   3      L33:   1.5306 L12:   1.4191                                     
REMARK   3      L13:   0.0844 L23:  -0.6055                                     
REMARK   3    S TENSOR                                                          
REMARK   3      S11:  -0.1654 S12:   0.5479 S13:   0.7312                       
REMARK   3      S21:   0.1995 S22:   0.0844 S23:   0.1432                       
REMARK   3      S31:  -0.4525 S32:   0.3106 S33:   0.0544                       
REMARK   3   TLS GROUP : 3                                                      
REMARK   3    SELECTION: (chain A and resid 32:49)                              
REMARK   3    ORIGIN FOR THE GROUP (A):   5.3785   4.7639  14.7963              
REMARK   3    T TENSOR                                                          
REMARK   3      T11:   0.1705 T22:   0.0961                                     
REMARK   3      T33:   0.1999 T12:  -0.0147                                     
REMARK   3      T13:   0.0206 T23:  -0.0350                                     
REMARK   3    L TENSOR                                                          
REMARK   3      L11:   2.8866 L22:   3.0137                                     
REMARK   3      L33:   0.2950 L12:  -1.2970                                     
REMARK   3      L13:   0.4063 L23:   0.3602                                     
REMARK   3    S TENSOR                                                          
REMARK   3      S11:  -0.1543 S12:   0.1384 S13:  -0.1212                       
REMARK   3      S21:   0.1993 S22:  -0.0593 S23:  -0.0586                       
REMARK   3      S31:  -0.0720 S32:   0.0441 S33:   0.2871                       
REMARK   3   TLS GROUP : 4                                                      
REMARK   3    SELECTION: (chain A and resid 50:67)                              
REMARK   3    ORIGIN FOR THE GROUP (A):  -2.2364   4.8065   7.4602              
REMARK   3    T TENSOR                                                          
REMARK   3      T11:   0.1372 T22:   0.0911                                     
REMARK   3      T33:   0.1343 T12:  -0.0218                                     
REMARK   3      T13:   0.0279 T23:   0.0019                                     
REMARK   3    L TENSOR                                                          
REMARK   3      L11:   6.0541 L22:   0.9853                                     
REMARK   3      L33:   0.9222 L12:  -1.7354                                     
REMARK   3      L13:  -1.4909 L23:   0.9242                                     
REMARK   3    S TENSOR                                                          
REMARK   3      S11:   0.0040 S12:   0.6414 S13:  -0.5099                       
REMARK   3      S21:   0.0445 S22:  -0.0995 S23:   0.1044                       
REMARK   3      S31:   0.1623 S32:  -0.2037 S33:   0.1226                       
REMARK   3   TLS GROUP : 5                                                      
REMARK   3    SELECTION: (chain A and resid 68:99)                              
REMARK   3    ORIGIN FOR THE GROUP (A):   2.4253  13.3576  12.0912              
REMARK   3    T TENSOR                                                          
REMARK   3      T11:   0.1546 T22:   0.0102                                     
REMARK   3      T33:   0.1919 T12:  -0.0222                                     
REMARK   3      T13:  -0.0059 T23:   0.0041                                     
REMARK   3    L TENSOR                                                          
REMARK   3      L11:   4.9112 L22:   0.7619                                     
REMARK   3      L33:   2.5306 L12:  -0.9286                                     
REMARK   3      L13:   2.6504 L23:  -1.3018                                     
REMARK   3    S TENSOR                                                          
REMARK   3      S11:  -0.2990 S12:  -0.0565 S13:   0.5262                       
REMARK   3      S21:   0.3998 S22:   0.1634 S23:  -0.0083                       
REMARK   3      S31:  -0.5544 S32:  -0.0286 S33:   0.1993                       
REMARK   3   TLS GROUP : 6                                                      
REMARK   3    SELECTION: (chain B and resid 4:72)                               
REMARK   3    ORIGIN FOR THE GROUP (A): -28.5752  15.6962  21.0806              
REMARK   3    T TENSOR                                                          
REMARK   3      T11:   0.1032 T22:   0.0570                                     
REMARK   3      T33:   0.0844 T12:  -0.0179                                     
REMARK   3      T13:   0.0329 T23:  -0.0067                                     
REMARK   3    L TENSOR                                                          
REMARK   3      L11:   1.1692 L22:   1.9080                                     
REMARK   3      L33:   0.4594 L12:   0.7267                                     
REMARK   3      L13:  -0.0047 L23:   0.3331                                     
REMARK   3    S TENSOR                                                          
REMARK   3      S11:   0.0688 S12:  -0.0577 S13:   0.0349                       
REMARK   3      S21:   0.2079 S22:  -0.0388 S23:   0.1278                       
REMARK   3      S31:   0.0235 S32:  -0.0439 S33:  -0.0274                       
REMARK   3   TLS GROUP : 7                                                      
REMARK   3    SELECTION: (chain B and resid 73:99)                              
REMARK   3    ORIGIN FOR THE GROUP (A): -26.2620  12.7578  15.5376              
REMARK   3    T TENSOR                                                          
REMARK   3      T11:   0.1169 T22:   0.0930                                     
REMARK   3      T33:   0.0462 T12:  -0.0082                                     
REMARK   3      T13:   0.0115 T23:   0.0024                                     
REMARK   3    L TENSOR                                                          
REMARK   3      L11:   3.4731 L22:   1.9518                                     
REMARK   3      L33:   0.6144 L12:  -1.1380                                     
REMARK   3      L13:   1.3327 L23:  -0.0495                                     
REMARK   3    S TENSOR                                                          
REMARK   3      S11:   0.0697 S12:   0.4969 S13:   0.1086                       
REMARK   3      S21:  -0.0219 S22:  -0.1284 S23:  -0.0215                       
REMARK   3      S31:   0.1101 S32:   0.1532 S33:   0.0217                       
REMARK   3   TLS GROUP : 8                                                      
REMARK   3    SELECTION: (chain C and resid 4:15)                               
REMARK   3    ORIGIN FOR THE GROUP (A): -21.7276   9.1270  -5.4391              
REMARK   3    T TENSOR                                                          
REMARK   3      T11:   0.4412 T22:   0.2463                                     
REMARK   3      T33:   0.1749 T12:  -0.0188                                     
REMARK   3      T13:  -0.0814 T23:   0.0793                                     
REMARK   3    L TENSOR                                                          
REMARK   3      L11:   1.1079 L22:   5.5035                                     
REMARK   3      L33:   0.3899 L12:   1.7999                                     
REMARK   3      L13:  -0.5300 L23:  -1.3582                                     
REMARK   3    S TENSOR                                                          
REMARK   3      S11:  -0.2249 S12:   0.3369 S13:   0.3441                       
REMARK   3      S21:  -1.4996 S22:   0.0933 S23:   0.1504                       
REMARK   3      S31:   0.3043 S32:   0.3608 S33:   0.1741                       
REMARK   3   TLS GROUP : 9                                                      
REMARK   3    SELECTION: (chain C and resid 16:27)                              
REMARK   3    ORIGIN FOR THE GROUP (A): -28.7708 -12.3933   5.2784              
REMARK   3    T TENSOR                                                          
REMARK   3      T11:   0.2608 T22:   0.0866                                     
REMARK   3      T33:   0.2179 T12:  -0.0342                                     
REMARK   3      T13:  -0.1452 T23:   0.0240                                     
REMARK   3    L TENSOR                                                          
REMARK   3      L11:   0.2108 L22:   0.4219                                     
REMARK   3      L33:   0.6632 L12:   0.0609                                     
REMARK   3      L13:  -0.0686 L23:  -0.4200                                     
REMARK   3    S TENSOR                                                          
REMARK   3      S11:   0.2282 S12:   0.1825 S13:   0.0196                       
REMARK   3      S21:  -0.3162 S22:   0.0636 S23:   0.3896                       
REMARK   3      S31:   0.1152 S32:  -0.0318 S33:  -0.2754                       
REMARK   3   TLS GROUP : 10                                                     
REMARK   3    SELECTION: (chain C and resid 28:49)                              
REMARK   3    ORIGIN FOR THE GROUP (A): -20.3865   4.4457   4.7898              
REMARK   3    T TENSOR                                                          
REMARK   3      T11:   0.1583 T22:   0.0672                                     
REMARK   3      T33:   0.0733 T12:   0.0034                                     
REMARK   3      T13:   0.0075 T23:   0.0248                                     
REMARK   3    L TENSOR                                                          
REMARK   3      L11:   1.1673 L22:   2.8006                                     
REMARK   3      L33:   0.5250 L12:   0.6627                                     
REMARK   3      L13:   0.2831 L23:  -0.8914                                     
REMARK   3    S TENSOR                                                          
REMARK   3      S11:   0.0230 S12:   0.1454 S13:   0.1208                       
REMARK   3      S21:  -0.3520 S22:   0.0307 S23:   0.0956                       
REMARK   3      S31:   0.1741 S32:   0.1089 S33:  -0.0605                       
REMARK   3   TLS GROUP : 11                                                     
REMARK   3    SELECTION: (chain C and resid 50:67)                              
REMARK   3    ORIGIN FOR THE GROUP (A): -16.2011  -3.9387   6.2044              
REMARK   3    T TENSOR                                                          
REMARK   3      T11:   0.2042 T22:   0.1636                                     
REMARK   3      T33:   0.1091 T12:   0.0183                                     
REMARK   3      T13:   0.0016 T23:   0.0140                                     
REMARK   3    L TENSOR                                                          
REMARK   3      L11:   0.7707 L22:   2.8637                                     
REMARK   3      L33:   1.0393 L12:   0.2084                                     
REMARK   3      L13:  -0.6095 L23:  -1.0020                                     
REMARK   3    S TENSOR                                                          
REMARK   3      S11:   0.0836 S12:   0.1095 S13:  -0.0811                       
REMARK   3      S21:  -0.3828 S22:  -0.1297 S23:  -0.6153                       
REMARK   3      S31:   0.4013 S32:   0.5933 S33:  -0.0508                       
REMARK   3   TLS GROUP : 12                                                     
REMARK   3    SELECTION: (chain C and resid 68:99)                              
REMARK   3    ORIGIN FOR THE GROUP (A): -26.1853   0.0655   7.3397              
REMARK   3    T TENSOR                                                          
REMARK   3      T11:   0.1119 T22:   0.0471                                     
REMARK   3      T33:   0.0786 T12:  -0.0144                                     
REMARK   3      T13:  -0.0150 T23:   0.0042                                     
REMARK   3    L TENSOR                                                          
REMARK   3      L11:   2.0265 L22:   0.5077                                     
REMARK   3      L33:   1.0612 L12:  -0.8538                                     
REMARK   3      L13:   0.2406 L23:  -0.4403                                     
REMARK   3    S TENSOR                                                          
REMARK   3      S11:   0.1015 S12:   0.0971 S13:   0.0463                       
REMARK   3      S21:  -0.1752 S22:   0.0439 S23:   0.3148                       
REMARK   3      S31:   0.0289 S32:  -0.0904 S33:  -0.1025                       
REMARK   3                                                                      
REMARK   3  NCS DETAILS                                                         
REMARK   3   NUMBER OF NCS GROUPS : NULL                                        
REMARK   3                                                                      
REMARK   3  OTHER REFINEMENT REMARKS: NULL                                      
REMARK   4                                                                      
REMARK   4 3QP3 COMPLIES WITH FORMAT V. 3.30, 13-JUL-11                         
REMARK 100                                                                      
REMARK 100 THIS ENTRY HAS BEEN PROCESSED BY PDBJ ON 23-FEB-11.                  
REMARK 100 THE RCSB ID CODE IS RCSB063924.                                      
REMARK 200                                                                      
REMARK 200 EXPERIMENTAL DETAILS                                                 
REMARK 200  EXPERIMENT TYPE                : X-RAY DIFFRACTION                  
REMARK 200  DATE OF DATA COLLECTION        : 02-MAR-09                          
REMARK 200  TEMPERATURE           (KELVIN) : 100                                
REMARK 200  PH                             : 4.0                                
REMARK 200  NUMBER OF CRYSTALS USED        : 1                                  
REMARK 200                                                                      
REMARK 200  SYNCHROTRON              (Y/N) : Y                                  
REMARK 200  RADIATION SOURCE               : ESRF                               
REMARK 200  BEAMLINE                       : ID14-1                             
REMARK 200  X-RAY GENERATOR MODEL          : NULL                               
REMARK 200  MONOCHROMATIC OR LAUE    (M/L) : M                                  
REMARK 200  WAVELENGTH OR RANGE        (A) : 0.93340                            
REMARK 200  MONOCHROMATOR                  : NULL                               
REMARK 200  OPTICS                         : NULL                               
REMARK 200                                                                      
REMARK 200  DETECTOR TYPE                  : CCD                                
REMARK 200  DETECTOR MANUFACTURER          : ADSC QUANTUM 4R                    
REMARK 200  INTENSITY-INTEGRATION SOFTWARE : XDS                                
REMARK 200  DATA SCALING SOFTWARE          : SCALA                              
REMARK 200                                                                      
REMARK 200  NUMBER OF UNIQUE REFLECTIONS   : 21724                              
REMARK 200  RESOLUTION RANGE HIGH      (A) : 1.997                              
REMARK 200  RESOLUTION RANGE LOW       (A) : 48.600                             
REMARK 200  REJECTION CRITERIA  (SIGMA(I)) : -3.000                             
REMARK 200                                                                      
REMARK 200 OVERALL.                                                             
REMARK 200  COMPLETENESS FOR RANGE     (%) : 99.6                               
REMARK 200  DATA REDUNDANCY                : NULL                               
REMARK 200  R MERGE                    (I) : 0.06300                            
REMARK 200  R SYM                      (I) : NULL                               
REMARK 200  <I/SIGMA(I)> FOR THE DATA SET  : 21.5000                            
REMARK 200                                                                      
REMARK 200 IN THE HIGHEST RESOLUTION SHELL.                                     
REMARK 200  HIGHEST RESOLUTION SHELL, RANGE HIGH (A) : 2.00                     
REMARK 200  HIGHEST RESOLUTION SHELL, RANGE LOW  (A) : 2.10                     
REMARK 200  COMPLETENESS FOR SHELL     (%) : 98.8                               
REMARK 200  DATA REDUNDANCY IN SHELL       : 4.60                               
REMARK 200  R MERGE FOR SHELL          (I) : 0.39300                            
REMARK 200  R SYM FOR SHELL            (I) : NULL                               
REMARK 200  <I/SIGMA(I)> FOR SHELL         : 4.300                              
REMARK 200                                                                      
REMARK 200 DIFFRACTION PROTOCOL: SINGLE WAVELENGTH                              
REMARK 200 METHOD USED TO DETERMINE THE STRUCTURE: SAD                          
REMARK 200 SOFTWARE USED: SOLVE                                                 
REMARK 200 STARTING MODEL: NULL                                                 
REMARK 200                                                                      
REMARK 200 REMARK: NULL                                                         
REMARK 280                                                                      
REMARK 280 CRYSTAL                                                              
REMARK 280 SOLVENT CONTENT, VS   (%): 44.00                                     
REMARK 280 MATTHEWS COEFFICIENT, VM (ANGSTROMS**3/DA): 2.20                     
REMARK 280                                                                      
REMARK 280 CRYSTALLIZATION CONDITIONS: 0.2M NA-CITRATE PH 4.0, 1.2M (NH4)       
REMARK 280  2SO4, 0.3M MGSO4, VAPOR DIFFUSION, HANGING DROP, TEMPERATURE 293K   
REMARK 290                                                                      
REMARK 290 CRYSTALLOGRAPHIC SYMMETRY                                            
REMARK 290 SYMMETRY OPERATORS FOR SPACE GROUP: P 41 21 2                        
REMARK 290                                                                      
REMARK 290      SYMOP   SYMMETRY                                                
REMARK 290     NNNMMM   OPERATOR                                                
REMARK 290       1555   X,Y,Z                                                   
REMARK 290       2555   -X,-Y,Z+1/2                                             
REMARK 290       3555   -Y+1/2,X+1/2,Z+1/4                                      
REMARK 290       4555   Y+1/2,-X+1/2,Z+3/4                                      
REMARK 290       5555   -X+1/2,Y+1/2,-Z+1/4                                     
REMARK 290       6555   X+1/2,-Y+1/2,-Z+3/4                                     
REMARK 290       7555   Y,X,-Z                                                  
REMARK 290       8555   -Y,-X,-Z+1/2                                            
REMARK 290                                                                      
REMARK 290     WHERE NNN -> OPERATOR NUMBER                                     
REMARK 290           MMM -> TRANSLATION VECTOR                                  
REMARK 290                                                                      
REMARK 290 CRYSTALLOGRAPHIC SYMMETRY TRANSFORMATIONS                            
REMARK 290 THE FOLLOWING TRANSFORMATIONS OPERATE ON THE ATOM/HETATM             
REMARK 290 RECORDS IN THIS ENTRY TO PRODUCE CRYSTALLOGRAPHICALLY                
REMARK 290 RELATED MOLECULES.                                                   
REMARK 290   SMTRY1   1  1.000000  0.000000  0.000000        0.00000            
REMARK 290   SMTRY2   1  0.000000  1.000000  0.000000        0.00000            
REMARK 290   SMTRY3   1  0.000000  0.000000  1.000000        0.00000            
REMARK 290   SMTRY1   2 -1.000000  0.000000  0.000000        0.00000            
REMARK 290   SMTRY2   2  0.000000 -1.000000  0.000000        0.00000            
REMARK 290   SMTRY3   2  0.000000  0.000000  1.000000       75.51150            
REMARK 290   SMTRY1   3  0.000000 -1.000000  0.000000       31.74700            
REMARK 290   SMTRY2   3  1.000000  0.000000  0.000000       31.74700            
REMARK 290   SMTRY3   3  0.000000  0.000000  1.000000       37.75575            
REMARK 290   SMTRY1   4  0.000000  1.000000  0.000000       31.74700            
REMARK 290   SMTRY2   4 -1.000000  0.000000  0.000000       31.74700            
REMARK 290   SMTRY3   4  0.000000  0.000000  1.000000      113.26725            
REMARK 290   SMTRY1   5 -1.000000  0.000000  0.000000       31.74700            
REMARK 290   SMTRY2   5  0.000000  1.000000  0.000000       31.74700            
REMARK 290   SMTRY3   5  0.000000  0.000000 -1.000000       37.75575            
REMARK 290   SMTRY1   6  1.000000  0.000000  0.000000       31.74700            
REMARK 290   SMTRY2   6  0.000000 -1.000000  0.000000       31.74700            
REMARK 290   SMTRY3   6  0.000000  0.000000 -1.000000      113.26725            
REMARK 290   SMTRY1   7  0.000000  1.000000  0.000000        0.00000            
REMARK 290   SMTRY2   7  1.000000  0.000000  0.000000        0.00000            
REMARK 290   SMTRY3   7  0.000000  0.000000 -1.000000        0.00000            
REMARK 290   SMTRY1   8  0.000000 -1.000000  0.000000        0.00000            
REMARK 290   SMTRY2   8 -1.000000  0.000000  0.000000        0.00000            
REMARK 290   SMTRY3   8  0.000000  0.000000 -1.000000       75.51150            
REMARK 290                                                                      
REMARK 290 REMARK: NULL                                                         
REMARK 300                                                                      
REMARK 300 BIOMOLECULE: 1, 2, 3                                                 
REMARK 300 SEE REMARK 350 FOR THE AUTHOR PROVIDED AND/OR PROGRAM                
REMARK 300 GENERATED ASSEMBLY INFORMATION FOR THE STRUCTURE IN                  
REMARK 300 THIS ENTRY. THE REMARK MAY ALSO PROVIDE INFORMATION ON               
REMARK 300 BURIED SURFACE AREA.                                                 
REMARK 350                                                                      
REMARK 350 COORDINATES FOR A COMPLETE MULTIMER REPRESENTING THE KNOWN           
REMARK 350 BIOLOGICALLY SIGNIFICANT OLIGOMERIZATION STATE OF THE                
REMARK 350 MOLECULE CAN BE GENERATED BY APPLYING BIOMT TRANSFORMATIONS          
REMARK 350 GIVEN BELOW.  BOTH NON-CRYSTALLOGRAPHIC AND                          
REMARK 350 CRYSTALLOGRAPHIC OPERATIONS ARE GIVEN.                               
REMARK 350                                                                      
REMARK 350 BIOMOLECULE: 1                                                       
REMARK 350 AUTHOR DETERMINED BIOLOGICAL UNIT: MONOMERIC                         
REMARK 350 SOFTWARE DETERMINED QUATERNARY STRUCTURE: MONOMERIC                  
REMARK 350 SOFTWARE USED: PISA                                                  
REMARK 350 APPLY THE FOLLOWING TO CHAINS: A                                     
REMARK 350   BIOMT1   1  1.000000  0.000000  0.000000        0.00000            
REMARK 350   BIOMT2   1  0.000000  1.000000  0.000000        0.00000            
REMARK 350   BIOMT3   1  0.000000  0.000000  1.000000        0.00000            
REMARK 350                                                                      
REMARK 350 BIOMOLECULE: 2                                                       
REMARK 350 AUTHOR DETERMINED BIOLOGICAL UNIT: MONOMERIC                         
REMARK 350 SOFTWARE DETERMINED QUATERNARY STRUCTURE: MONOMERIC                  
REMARK 350 SOFTWARE USED: PISA                                                  
REMARK 350 APPLY THE FOLLOWING TO CHAINS: B                                     
REMARK 350   BIOMT1   1  1.000000  0.000000  0.000000        0.00000            
REMARK 350   BIOMT2   1  0.000000  1.000000  0.000000        0.00000            
REMARK 350   BIOMT3   1  0.000000  0.000000  1.000000        0.00000            
REMARK 350                                                                      
REMARK 350 BIOMOLECULE: 3                                                       
REMARK 350 AUTHOR DETERMINED BIOLOGICAL UNIT: MONOMERIC                         
REMARK 350 SOFTWARE DETERMINED QUATERNARY STRUCTURE: MONOMERIC                  
REMARK 350 SOFTWARE USED: PISA                                                  
REMARK 350 APPLY THE FOLLOWING TO CHAINS: C                                     
REMARK 350   BIOMT1   1  1.000000  0.000000  0.000000        0.00000            
REMARK 350   BIOMT2   1  0.000000  1.000000  0.000000        0.00000            
REMARK 350   BIOMT3   1  0.000000  0.000000  1.000000        0.00000            
REMARK 465                                                                      
REMARK 465 MISSING RESIDUES                                                     
REMARK 465 THE FOLLOWING RESIDUES WERE NOT LOCATED IN THE                       
REMARK 465 EXPERIMENT. (M=MODEL NUMBER; RES=RESIDUE NAME; C=CHAIN               
REMARK 465 IDENTIFIER; SSSEQ=SEQUENCE NUMBER; I=INSERTION CODE.)                
REMARK 465                                                                      
REMARK 465   M RES C SSSEQI                                                     
REMARK 465     ASP A   102                                                      
REMARK 465     TYR A   103                                                      
REMARK 465     GLY B   101                                                      
REMARK 465     ASP B   102                                                      
REMARK 465     TYR B   103                                                      
REMARK 465     GLY C     1                                                      
REMARK 465     PRO C     2                                                      
REMARK 465     PHE C     3                                                      
REMARK 465     GLY C   101                                                      
REMARK 465     ASP C   102                                                      
REMARK 465     TYR C   103                                                      
REMARK 470                                                                      
REMARK 470 MISSING ATOM                                                         
REMARK 470 THE FOLLOWING RESIDUES HAVE MISSING ATOMS (M=MODEL NUMBER;           
REMARK 470 RES=RESIDUE NAME; C=CHAIN IDENTIFIER; SSEQ=SEQUENCE NUMBER;          
REMARK 470 I=INSERTION CODE):                                                   
REMARK 470   M RES CSSEQI  ATOMS                                                
REMARK 470     THR A   4    OG1  CG2                                            
REMARK 470     ARG A  16    CG   CD   NE   CZ   NH1  NH2                        
REMARK 470     GLN A  50    CG   CD   OE1  NE2                                  
REMARK 470     TYR A  93    CD1  CD2  CE1  CE2  CZ   OH                         
REMARK 470     THR B   4    OG1  CG2                                            
REMARK 470     LEU B   5    CG   CD1  CD2                                       
REMARK 470     ARG B  10    CG   CD   NE   CZ   NH1  NH2                        
REMARK 470     ARG B  16    CG   CD   NE   CZ   NH1  NH2                        
REMARK 470     ARG B  27    CG   CD   NE   CZ   NH1  NH2                        
REMARK 470     GLN B  33    CG   CD   OE1  NE2                                  
REMARK 470     GLN B  50    CD   OE1  NE2                                       
REMARK 470     ASP B  74    CG   OD1  OD2                                       
REMARK 470     THR C   4    OG1  CG2                                            
REMARK 470     LEU C   5    CG   CD1  CD2                                       
REMARK 470     ARG C  10    CG   CD   NE   CZ   NH1  NH2                        
REMARK 470     ARG C  27    CG   CD   NE   CZ   NH1  NH2                        
REMARK 470     GLN C  33    CG   CD   OE1  NE2                                  
REMARK 470     GLN C  50    CG   CD   OE1  NE2                                  
REMARK 800                                                                      
REMARK 800 SITE                                                                 
REMARK 800 SITE_IDENTIFIER: AC1                                                 
REMARK 800 EVIDENCE_CODE: SOFTWARE                                              
REMARK 800 SITE_DESCRIPTION: BINDING SITE FOR RESIDUE SO4 A 104                 
REMARK 800                                                                      
REMARK 800 SITE_IDENTIFIER: AC2                                                 
REMARK 800 EVIDENCE_CODE: SOFTWARE                                              
REMARK 800 SITE_DESCRIPTION: BINDING SITE FOR RESIDUE SO4 A 105                 
REMARK 800                                                                      
REMARK 800 SITE_IDENTIFIER: AC3                                                 
REMARK 800 EVIDENCE_CODE: SOFTWARE                                              
REMARK 800 SITE_DESCRIPTION: BINDING SITE FOR RESIDUE SO4 A 106                 
REMARK 800                                                                      
REMARK 800 SITE_IDENTIFIER: AC4                                                 
REMARK 800 EVIDENCE_CODE: SOFTWARE                                              
REMARK 800 SITE_DESCRIPTION: BINDING SITE FOR RESIDUE SO4 A 107                 
REMARK 800                                                                      
REMARK 800 SITE_IDENTIFIER: AC5                                                 
REMARK 800 EVIDENCE_CODE: SOFTWARE                                              
REMARK 800 SITE_DESCRIPTION: BINDING SITE FOR RESIDUE SO4 A 108                 
REMARK 800                                                                      
REMARK 800 SITE_IDENTIFIER: AC6                                                 
REMARK 800 EVIDENCE_CODE: SOFTWARE                                              
REMARK 800 SITE_DESCRIPTION: BINDING SITE FOR RESIDUE SO4 B 104                 
REMARK 800                                                                      
REMARK 800 SITE_IDENTIFIER: AC7                                                 
REMARK 800 EVIDENCE_CODE: SOFTWARE                                              
REMARK 800 SITE_DESCRIPTION: BINDING SITE FOR RESIDUE SO4 C 104                 
REMARK 900                                                                      
REMARK 900 RELATED ENTRIES                                                      
REMARK 900 RELATED ID: 3PUC   RELATED DB: PDB                                   
REMARK 900 RELATED ID: 3Q5O   RELATED DB: PDB                                   
REMARK 900 RELATED ID: 3KNB   RELATED DB: PDB                                   
DBREF  3QP3 A    2   103  UNP    Q8WZ42   TITIN_HUMAN  33294  33395             
DBREF  3QP3 B    2   103  UNP    Q8WZ42   TITIN_HUMAN  33294  33395             
DBREF  3QP3 C    2   103  UNP    Q8WZ42   TITIN_HUMAN  33294  33395             
SEQADV 3QP3 GLY A    1  UNP  Q8WZ42              EXPRESSION TAG                 
SEQADV 3QP3 GLY B    1  UNP  Q8WZ42              EXPRESSION TAG                 
SEQADV 3QP3 GLY C    1  UNP  Q8WZ42              EXPRESSION TAG                 
SEQRES   1 A  103  GLY PRO PHE THR LEU ASP HIS ALA PRO ARG ILE THR LEU          
SEQRES   2 A  103  ARG MET ARG SER HIS ARG VAL PRO CYS GLY GLN ASN THR          
SEQRES   3 A  103  ARG PHE ILE LEU ASN VAL GLN SER LYS PRO THR ALA GLU          
SEQRES   4 A  103  VAL LYS TRP TYR HIS ASN GLY VAL GLU LEU GLN GLU SER          
SEQRES   5 A  103  SER LYS ILE HIS TYR THR ASN THR SER GLY VAL LEU THR          
SEQRES   6 A  103  LEU GLU ILE LEU ASP CYS HIS THR ASP ASP SER GLY THR          
SEQRES   7 A  103  TYR ARG ALA VAL CYS THR ASN TYR LYS GLY GLU ALA SER          
SEQRES   8 A  103  ASP TYR ALA THR LEU ASP VAL THR GLY GLY ASP TYR              
SEQRES   1 B  103  GLY PRO PHE THR LEU ASP HIS ALA PRO ARG ILE THR LEU          
SEQRES   2 B  103  ARG MET ARG SER HIS ARG VAL PRO CYS GLY GLN ASN THR          
SEQRES   3 B  103  ARG PHE ILE LEU ASN VAL GLN SER LYS PRO THR ALA GLU          
SEQRES   4 B  103  VAL LYS TRP TYR HIS ASN GLY VAL GLU LEU GLN GLU SER          
SEQRES   5 B  103  SER LYS ILE HIS TYR THR ASN THR SER GLY VAL LEU THR          
SEQRES   6 B  103  LEU GLU ILE LEU ASP CYS HIS THR ASP ASP SER GLY THR          
SEQRES   7 B  103  TYR ARG ALA VAL CYS THR ASN TYR LYS GLY GLU ALA SER          
SEQRES   8 B  103  ASP TYR ALA THR LEU ASP VAL THR GLY GLY ASP TYR              
SEQRES   1 C  103  GLY PRO PHE THR LEU ASP HIS ALA PRO ARG ILE THR LEU          
SEQRES   2 C  103  ARG MET ARG SER HIS ARG VAL PRO CYS GLY GLN ASN THR          
SEQRES   3 C  103  ARG PHE ILE LEU ASN VAL GLN SER LYS PRO THR ALA GLU          
SEQRES   4 C  103  VAL LYS TRP TYR HIS ASN GLY VAL GLU LEU GLN GLU SER          
SEQRES   5 C  103  SER LYS ILE HIS TYR THR ASN THR SER GLY VAL LEU THR          
SEQRES   6 C  103  LEU GLU ILE LEU ASP CYS HIS THR ASP ASP SER GLY THR          
SEQRES   7 C  103  TYR ARG ALA VAL CYS THR ASN TYR LYS GLY GLU ALA SER          
SEQRES   8 C  103  ASP TYR ALA THR LEU ASP VAL THR GLY GLY ASP TYR              
HET    SO4  A 104       5                                                       
HET    SO4  A 105       5                                                       
HET    SO4  A 106       5                                                       
HET    SO4  A 107       5                                                       
HET    SO4  A 108       5                                                       
HET    SO4  B 104       5                                                       
HET    SO4  C 104       5                                                       
HETNAM     SO4 SULFATE ION                                                      
FORMUL   4  SO4    7(O4 S 2-)                                                   
FORMUL  11  HOH   *291(H2 O)                                                    
HELIX    1   1 HIS A   72  SER A   76  5                                   5    
HELIX    2   2 HIS B   72  SER B   76  5                                   5    
HELIX    3   3 HIS C   72  SER C   76  5                                   5    
SHEET    1   A 4 HIS A   7  LEU A  13  0                                        
SHEET    2   A 4 THR A  26  LYS A  35 -1  O  GLN A  33   N  ARG A  10           
SHEET    3   A 4 VAL A  63  ILE A  68 -1  O  LEU A  64   N  LEU A  30           
SHEET    4   A 4 ILE A  55  THR A  60 -1  N  THR A  60   O  VAL A  63           
SHEET    1   B 5 HIS A  18  PRO A  21  0                                        
SHEET    2   B 5 GLY A  88  THR A  99  1  O  THR A  99   N  VAL A  20           
SHEET    3   B 5 GLY A  77  ASN A  85 -1  N  CYS A  83   O  ALA A  90           
SHEET    4   B 5 GLU A  39  HIS A  44 -1  N  GLU A  39   O  THR A  84           
SHEET    5   B 5 VAL A  47  GLU A  48 -1  O  VAL A  47   N  HIS A  44           
SHEET    1   C 4 HIS B   7  LEU B  13  0                                        
SHEET    2   C 4 THR B  26  LYS B  35 -1  O  GLN B  33   N  ARG B  10           
SHEET    3   C 4 VAL B  63  ILE B  68 -1  O  ILE B  68   N  THR B  26           
SHEET    4   C 4 ILE B  55  THR B  60 -1  N  HIS B  56   O  GLU B  67           
SHEET    1   D 5 HIS B  18  PRO B  21  0                                        
SHEET    2   D 5 GLY B  88  THR B  99  1  O  ASP B  97   N  VAL B  20           
SHEET    3   D 5 GLY B  77  ASN B  85 -1  N  CYS B  83   O  ALA B  90           
SHEET    4   D 5 GLU B  39  HIS B  44 -1  N  GLU B  39   O  THR B  84           
SHEET    5   D 5 VAL B  47  GLU B  48 -1  O  VAL B  47   N  HIS B  44           
SHEET    1   E 4 HIS C   7  LEU C  13  0                                        
SHEET    2   E 4 THR C  26  LYS C  35 -1  O  GLN C  33   N  ARG C  10           
SHEET    3   E 4 VAL C  63  ILE C  68 -1  O  LEU C  64   N  LEU C  30           
SHEET    4   E 4 ILE C  55  THR C  60 -1  N  HIS C  56   O  GLU C  67           
SHEET    1   F 5 HIS C  18  PRO C  21  0                                        
SHEET    2   F 5 GLY C  88  THR C  99  1  O  ASP C  97   N  HIS C  18           
SHEET    3   F 5 GLY C  77  ASN C  85 -1  N  TYR C  79   O  ALA C  94           
SHEET    4   F 5 GLU C  39  HIS C  44 -1  N  GLU C  39   O  THR C  84           
SHEET    5   F 5 VAL C  47  GLU C  48 -1  O  VAL C  47   N  HIS C  44           
CISPEP   1 LYS A   35    PRO A   36          0         0.12                     
CISPEP   2 LYS B   35    PRO B   36          0        -2.39                     
CISPEP   3 LYS C   35    PRO C   36          0        -0.58                     
SITE     1 AC1  6 PRO A  36  THR A  37  ASN B  25  HOH B 128                    
SITE     2 AC1  6 HOH B 173  LYS C  35                                          
SITE     1 AC2  6 ASN A  25  ARG A  27  GLU A  67  HOH A 123                    
SITE     2 AC2  6 PRO C  36  THR C  37                                          
SITE     1 AC3  7 THR A  26  ARG A  27  ASN A  31  GLN A  33                    
SITE     2 AC3  7 HOH A 128  HOH A 135  HOH A 248                               
SITE     1 AC4  6 GLY A 100  GLY A 101  HOH A 219  ARG C  16                    
SITE     2 AC4  6 HIS C  18  ARG C  19                                          
SITE     1 AC5  6 GLU A  89  ALA A  90  SER A  91  HOH A 212                    
SITE     2 AC5  6 HOH A 293  ARG B  19                                          
SITE     1 AC6  6 GLY B  46  THR B  78  ARG B  80  HOH B 120                    
SITE     2 AC6  6 ARG C  80  GLU C  89                                          
SITE     1 AC7  7 GLY A   1  ASN A  45  GLY A  46  THR A  78                    
SITE     2 AC7  7 ARG A  80  HOH A 148  THR C  73                               
CRYST1   63.494   63.494  151.023  90.00  90.00  90.00 P 41 21 2    24          
ORIGX1      1.000000  0.000000  0.000000        0.00000                         
ORIGX2      0.000000  1.000000  0.000000        0.00000                         
ORIGX3      0.000000  0.000000  1.000000        0.00000                         
SCALE1      0.015750  0.000000  0.000000        0.00000                         
SCALE2      0.000000  0.015750  0.000000        0.00000                         
SCALE3      0.000000  0.000000  0.006622        0.00000                         
ATOM      1  N   GLY A   1      26.641 -13.643  15.271  1.00 51.27           N  
ATOM      2  CA  GLY A   1      25.446 -14.009  16.009  1.00 50.55           C  
ATOM      3  C   GLY A   1      24.178 -13.628  15.271  1.00 49.47           C  
ATOM      4  O   GLY A   1      24.208 -12.781  14.375  1.00 49.22           O  
ATOM      5  N   PRO A   2      23.053 -14.258  15.642  1.00 49.51           N  
ATOM      6  CA  PRO A   2      21.761 -13.998  14.993  1.00 49.91           C  
ATOM      7  C   PRO A   2      21.230 -12.578  15.222  1.00 47.32           C  
ATOM      8  O   PRO A   2      20.383 -12.121  14.453  1.00 48.50           O  
ATOM      9  CB  PRO A   2      20.828 -15.043  15.624  1.00 49.83           C  
ATOM     10  CG  PRO A   2      21.494 -15.441  16.905  1.00 49.41           C  
ATOM     11  CD  PRO A   2      22.968 -15.326  16.654  1.00 49.35           C  
ATOM     12  N   PHE A   3      21.726 -11.888  16.246  1.00 44.48           N  
ATOM     13  CA  PHE A   3      21.239 -10.542  16.556  1.00 44.60           C  
ATOM     14  C   PHE A   3      22.286  -9.449  16.313  1.00 41.61           C  
ATOM     15  O   PHE A   3      22.100  -8.298  16.717  1.00 39.91           O  
ATOM     16  CB  PHE A   3      20.749 -10.464  18.005  1.00 46.00           C  
ATOM     17  CG  PHE A   3      19.877 -11.612  18.414  1.00 47.99           C  
ATOM     18  CD1 PHE A   3      18.734 -11.923  17.697  1.00 48.35           C  
ATOM     19  CD2 PHE A   3      20.195 -12.376  19.525  1.00 48.87           C  
ATOM     20  CE1 PHE A   3      17.929 -12.977  18.072  1.00 48.05           C  
ATOM     21  CE2 PHE A   3      19.393 -13.431  19.907  1.00 48.51           C  
ATOM     22  CZ  PHE A   3      18.258 -13.731  19.179  1.00 48.48           C  
ATOM     23  N   THR A   4      23.385  -9.809  15.659  1.00 39.98           N  
ATOM     24  CA  THR A   4      24.465  -8.857  15.414  1.00 37.00           C  
ATOM     25  C   THR A   4      24.032  -7.729  14.468  1.00 31.73           C  
ATOM     26  O   THR A   4      24.461  -6.582  14.623  1.00 34.43           O  
ATOM     27  CB  THR A   4      25.734  -9.561  14.867  1.00 55.26           C  
ATOM     28  N   LEU A   5      23.178  -8.054  13.500  1.00 55.67           N  
ANISOU   28  N   LEU A   5     4164   6576  10413    397    125   1229       N  
ATOM     29  CA  LEU A   5      22.711  -7.063  12.533  1.00 47.45           C  
ANISOU   29  CA  LEU A   5     3224   5612   9191    248    200   1005       C  
ATOM     30  C   LEU A   5      21.489  -6.274  13.015  1.00 40.83           C  
ANISOU   30  C   LEU A   5     2638   4789   8086    116    148    992       C  
ATOM     31  O   LEU A   5      20.993  -5.393  12.307  1.00 37.23           O  
ANISOU   31  O   LEU A   5     2287   4394   7466     -5    194    828       O  
ATOM     32  CB  LEU A   5      22.414  -7.716  11.185  1.00 46.53           C  
ANISOU   32  CB  LEU A   5     3085   5356   9238    294    415    789       C  
ATOM     33  CG  LEU A   5      23.604  -8.416  10.529  1.00 51.22           C  
ANISOU   33  CG  LEU A   5     3439   5924  10097    416    515    762       C  
ATOM     34  CD1 LEU A   5      23.170  -9.071   9.226  1.00 52.79           C  
ANISOU   34  CD1 LEU A   5     3668   5965  10426    440    742    535       C  
ATOM     35  CD2 LEU A   5      24.754  -7.436  10.302  1.00 50.45           C  
ANISOU   35  CD2 LEU A   5     3197   6047   9923    342    446    753       C  
ATOM     36  N   ASP A   6      21.005  -6.585  14.214  1.00 37.24           N  
ANISOU   36  N   ASP A   6     2286   4273   7591    141     59   1168       N  
ATOM     37  CA  ASP A   6      19.915  -5.809  14.803  1.00 30.71           C  
ANISOU   37  CA  ASP A   6     1691   3460   6516     19     17   1175       C  
ATOM     38  C   ASP A   6      20.350  -4.362  14.969  1.00 30.54           C  
ANISOU   38  C   ASP A   6     1714   3650   6240   -132    -94   1169       C  
ATOM     39  O   ASP A   6      21.494  -4.093  15.335  1.00 29.06           O  
ANISOU   39  O   ASP A   6     1399   3599   6042   -141   -212   1271       O  
ATOM     40  CB  ASP A   6      19.503  -6.377  16.158  1.00 30.70           C  
ANISOU   40  CB  ASP A   6     1790   3367   6509     66    -59   1384       C  
ATOM     41  CG  ASP A   6      18.772  -7.696  16.040  1.00 32.46           C  
ANISOU   41  CG  ASP A   6     2029   3359   6945    186     70   1376       C  
ATOM     42  OD1 ASP A   6      18.489  -8.124  14.901  1.00 35.30           O  
ANISOU   42  OD1 ASP A   6     2339   3631   7442    218    217   1195       O  
ATOM     43  OD2 ASP A   6      18.457  -8.286  17.089  1.00 30.97           O  
ANISOU   43  OD2 ASP A   6     1921   3073   6775    235     28   1547       O  
ATOM     44  N   HIS A   7      19.439  -3.432  14.708  1.00 26.76           N  
ANISOU   44  N   HIS A   7     1412   3195   5561   -253    -56   1053       N  
ATOM     45  CA  HIS A   7      19.759  -2.012  14.813  1.00 26.60           C  
ANISOU   45  CA  HIS A   7     1463   3353   5290   -404   -137   1032       C  
ATOM     46  C   HIS A   7      18.504  -1.205  15.104  1.00 26.28           C  
ANISOU   46  C   HIS A   7     1664   3283   5038   -505   -110    992       C  
ATOM     47  O   HIS A   7      17.389  -1.634  14.784  1.00 22.47           O  
ANISOU   47  O   HIS A   7     1258   2662   4618   -467     -5    919       O  
ATOM     48  CB  HIS A   7      20.449  -1.499  13.539  1.00 30.59           C  
ANISOU   48  CB  HIS A   7     1853   3959   5810   -446    -79    862       C  
ATOM     49  CG  HIS A   7      19.598  -1.580  12.306  1.00 34.81           C  
ANISOU   49  CG  HIS A   7     2440   4402   6383   -443     73    658       C  
ATOM     50  ND1 HIS A   7      18.731  -0.573  11.929  1.00 35.54           N  
ANISOU   50  ND1 HIS A   7     2706   4520   6278   -553    103    551       N  
ATOM     51  CD2 HIS A   7      19.484  -2.546  11.366  1.00 35.68           C  
ANISOU   51  CD2 HIS A   7     2460   4395   6703   -350    198    546       C  
ATOM     52  CE1 HIS A   7      18.116  -0.920  10.812  1.00 33.59           C  
ANISOU   52  CE1 HIS A   7     2464   4186   6113   -529    222    389       C  
ATOM     53  NE2 HIS A   7      18.556  -2.111  10.446  1.00 34.52           N  
ANISOU   53  NE2 HIS A   7     2432   4216   6469   -416    285    375       N  
ATOM     54  N   ALA A   8      18.684  -0.050  15.730  1.00 24.36           N  
ANISOU   54  N   ALA A   8     1537   3164   4553   -635   -199   1043       N  
ATOM     55  CA  ALA A   8      17.561   0.827  16.021  1.00 26.10           C  
ANISOU   55  CA  ALA A   8     1988   3358   4573   -730   -159   1008       C  
ATOM     56  C   ALA A   8      16.941   1.285  14.703  1.00 23.53           C  
ANISOU   56  C   ALA A   8     1682   3015   4244   -751    -44    805       C  
ATOM     57  O   ALA A   8      17.619   1.309  13.674  1.00 25.64           O  
ANISOU   57  O   ALA A   8     1820   3344   4579   -745    -19    695       O  
ATOM     58  CB  ALA A   8      18.028   2.027  16.853  1.00 27.95           C  
ANISOU   58  CB  ALA A   8     2344   3732   4545   -876   -266   1086       C  
ATOM     59  N   PRO A   9      15.651   1.651  14.732  1.00 21.80           N  
ANISOU   59  N   PRO A   9     1625   2712   3946   -777     29    759       N  
ATOM     60  CA  PRO A   9      14.964   2.076  13.508  1.00 20.31           C  
ANISOU   60  CA  PRO A   9     1461   2506   3750   -795    119    584       C  
ATOM     61  C   PRO A   9      15.741   3.190  12.799  1.00 22.00           C  
ANISOU   61  C   PRO A   9     1673   2868   3819   -892     96    495       C  
ATOM     62  O   PRO A   9      16.319   4.064  13.448  1.00 18.46           O  
ANISOU   62  O   PRO A   9     1294   2524   3198   -985     25    563       O  
ATOM     63  CB  PRO A   9      13.619   2.588  14.026  1.00 18.67           C  
ANISOU   63  CB  PRO A   9     1438   2219   3436   -828    167    603       C  
ATOM     64  CG  PRO A   9      13.374   1.790  15.287  1.00 21.73           C  
ANISOU   64  CG  PRO A   9     1858   2515   3883   -779    150    759       C  
ATOM     65  CD  PRO A   9      14.758   1.653  15.905  1.00 21.88           C  
ANISOU   65  CD  PRO A   9     1798   2636   3879   -789     33    874       C  
ATOM     66  N   ARG A  10      15.762   3.138  11.474  1.00 23.85           N  
ANISOU   66  N   ARG A  10     1839   3106   4118   -881    158    342       N  
ATOM     67  CA  ARG A  10      16.483   4.115  10.663  1.00 25.65           C  
ANISOU   67  CA  ARG A  10     2065   3460   4221   -971    157    244       C  
ATOM     68  C   ARG A  10      15.531   4.670   9.610  1.00 23.89           C  
ANISOU   68  C   ARG A  10     1945   3202   3931  -1000    228    105       C  
ATOM     69  O   ARG A  10      15.093   3.947   8.713  1.00 23.27           O  
ANISOU   69  O   ARG A  10     1806   3049   3984   -943    287      6       O  
ATOM     70  CB  ARG A  10      17.684   3.444   9.994  1.00 31.89           C  
ANISOU   70  CB  ARG A  10     2654   4299   5164   -931    167    196       C  
ATOM     71  CG  ARG A  10      18.443   4.309   9.007  1.00 39.69           C  
ANISOU   71  CG  ARG A  10     3628   5404   6051  -1022    193     77       C  
ATOM     72  CD  ARG A  10      19.677   3.585   8.466  1.00 46.67           C  
ANISOU   72  CD  ARG A  10     4295   6329   7109   -975    221     41       C  
ATOM     73  NE  ARG A  10      19.344   2.311   7.825  1.00 50.08           N  
ANISOU   73  NE  ARG A  10     4636   6630   7762   -858    308    -27       N  
ATOM     74  CZ  ARG A  10      19.790   1.122   8.228  1.00 51.27           C  
ANISOU   74  CZ  ARG A  10     4631   6717   8131   -742    309     51       C  
ATOM     75  NH1 ARG A  10      20.601   1.029   9.277  1.00 53.26           N  
ANISOU   75  NH1 ARG A  10     4789   7034   8412   -722    209    212       N  
ATOM     76  NH2 ARG A  10      19.429   0.021   7.577  1.00 49.00           N  
ANISOU   76  NH2 ARG A  10     4289   6297   8033   -650    408    -28       N  
ATOM     77  N   ILE A  11      15.189   5.944   9.729  1.00 23.34           N  
ANISOU   77  N   ILE A  11     2035   3180   3653  -1090    220    102       N  
ATOM     78  CA  ILE A  11      14.277   6.553   8.777  1.00 22.55           C  
ANISOU   78  CA  ILE A  11     2035   3050   3482  -1112    271     -7       C  
ATOM     79  C   ILE A  11      15.055   7.082   7.578  1.00 22.36           C  
ANISOU   79  C   ILE A  11     1989   3118   3390  -1176    291   -131       C  
ATOM     80  O   ILE A  11      15.810   8.053   7.706  1.00 21.49           O  
ANISOU   80  O   ILE A  11     1933   3108   3124  -1271    271   -122       O  
ATOM     81  CB  ILE A  11      13.475   7.681   9.426  1.00 24.63           C  
ANISOU   81  CB  ILE A  11     2490   3300   3568  -1164    272     51       C  
ATOM     82  CG1 ILE A  11      12.609   7.125  10.566  1.00 24.51           C  
ANISOU   82  CG1 ILE A  11     2507   3180   3625  -1103    278    164       C  
ATOM     83  CG2 ILE A  11      12.610   8.369   8.382  1.00 24.20           C  
ANISOU   83  CG2 ILE A  11     2526   3224   3447  -1178    313    -49       C  
ATOM     84  CD1 ILE A  11      11.898   8.194  11.382  1.00 22.69           C  
ANISOU   84  CD1 ILE A  11     2469   2924   3229  -1153    302    231       C  
ATOM     85  N   THR A  12      14.886   6.439   6.418  1.00 19.53           N  
ANISOU   85  N   THR A  12     1559   2721   3140  -1139    338   -251       N  
ATOM     86  CA  THR A  12      15.703   6.780   5.248  1.00 25.12           C  
ANISOU   86  CA  THR A  12     2241   3505   3796  -1200    376   -374       C  
ATOM     87  C   THR A  12      15.007   7.775   4.333  1.00 26.19           C  
ANISOU   87  C   THR A  12     2534   3649   3767  -1263    392   -459       C  
ATOM     88  O   THR A  12      15.634   8.396   3.482  1.00 25.88           O  
ANISOU   88  O   THR A  12     2530   3680   3622  -1339    421   -545       O  
ATOM     89  CB  THR A  12      16.107   5.535   4.428  1.00 25.15           C  
ANISOU   89  CB  THR A  12     2094   3467   3997  -1139    434   -469       C  
ATOM     90  OG1 THR A  12      14.940   4.949   3.827  1.00 23.24           O  
ANISOU   90  OG1 THR A  12     1885   3119   3826  -1096    458   -536       O  
ATOM     91  CG2 THR A  12      16.802   4.512   5.326  1.00 23.61           C  
ANISOU   91  CG2 THR A  12     1737   3252   3984  -1058    419   -370       C  
ATOM     92  N   LEU A  13      13.704   7.914   4.515  1.00 24.38           N  
ANISOU   92  N   LEU A  13     2395   3343   3525  -1227    375   -428       N  
ATOM     93  CA  LEU A  13      12.928   8.889   3.773  1.00 23.93           C  
ANISOU   93  CA  LEU A  13     2484   3286   3321  -1269    375   -477       C  
ATOM     94  C   LEU A  13      12.005   9.586   4.758  1.00 21.23           C  
ANISOU   94  C   LEU A  13     2255   2901   2910  -1252    355   -364       C  
ATOM     95  O   LEU A  13      11.163   8.947   5.388  1.00 19.42           O  
ANISOU   95  O   LEU A  13     1988   2589   2802  -1180    351   -304       O  
ATOM     96  CB  LEU A  13      12.093   8.192   2.703  1.00 24.67           C  
ANISOU   96  CB  LEU A  13     2549   3318   3507  -1233    380   -574       C  
ATOM     97  CG  LEU A  13      11.048   9.072   2.025  1.00 26.74           C  
ANISOU   97  CG  LEU A  13     2946   3568   3645  -1254    352   -596       C  
ATOM     98  CD1 LEU A  13      11.740  10.190   1.250  1.00 26.98           C  
ANISOU   98  CD1 LEU A  13     3094   3681   3475  -1347    366   -653       C  
ATOM     99  CD2 LEU A  13      10.188   8.219   1.113  1.00 31.22           C  
ANISOU   99  CD2 LEU A  13     3464   4077   4321  -1225    335   -680       C  
ATOM    100  N   ARG A  14      12.160  10.893   4.894  1.00 19.40           N  
ANISOU  100  N   ARG A  14     2168   2715   2488  -1322    359   -339       N  
ATOM    101  CA  ARG A  14      11.424  11.611   5.914  1.00 20.56           C  
ANISOU  101  CA  ARG A  14     2436   2813   2563  -1313    366   -233       C  
ATOM    102  C   ARG A  14      10.212  12.317   5.315  1.00 21.58           C  
ANISOU  102  C   ARG A  14     2674   2887   2639  -1286    375   -246       C  
ATOM    103  O   ARG A  14      10.173  12.599   4.105  1.00 18.44           O  
ANISOU  103  O   ARG A  14     2302   2517   2189  -1308    363   -331       O  
ATOM    104  CB  ARG A  14      12.351  12.585   6.662  1.00 28.23           C  
ANISOU  104  CB  ARG A  14     3509   3854   3362  -1411    373   -182       C  
ATOM    105  CG  ARG A  14      13.699  11.973   7.068  1.00 32.64           C  
ANISOU  105  CG  ARG A  14     3938   4495   3969  -1449    342   -172       C  
ATOM    106  CD  ARG A  14      14.537  12.884   7.984  1.00 34.31           C  
ANISOU  106  CD  ARG A  14     4245   4779   4014  -1560    329   -107       C  
ATOM    107  NE  ARG A  14      13.898  13.073   9.281  1.00 36.57           N  
ANISOU  107  NE  ARG A  14     4633   5000   4262  -1549    331      7       N  
ATOM    108  CZ  ARG A  14      14.184  12.378  10.384  1.00 34.00           C  
ANISOU  108  CZ  ARG A  14     4244   4674   4002  -1533    289    101       C  
ATOM    109  NH1 ARG A  14      15.135  11.453  10.378  1.00 30.63           N  
ANISOU  109  NH1 ARG A  14     3634   4310   3694  -1517    233    106       N  
ATOM    110  NH2 ARG A  14      13.525  12.632  11.506  1.00 31.19           N  
ANISOU  110  NH2 ARG A  14     4015   4249   3588  -1535    308    196       N  
ATOM    111  N   MET A  15       9.215  12.565   6.167  1.00 20.95           N  
ANISOU  111  N   MET A  15     2654   2727   2580  -1236    398   -156       N  
ATOM    112  CA  MET A  15       7.986  13.240   5.775  1.00 20.99           C  
ANISOU  112  CA  MET A  15     2742   2670   2564  -1191    410   -141       C  
ATOM    113  C   MET A  15       8.293  14.647   5.299  1.00 22.67           C  
ANISOU  113  C   MET A  15     3125   2919   2570  -1257    428   -155       C  
ATOM    114  O   MET A  15       9.292  15.241   5.708  1.00 25.07           O  
ANISOU  114  O   MET A  15     3511   3277   2739  -1344    452   -149       O  
ATOM    115  CB  MET A  15       7.008  13.312   6.947  1.00 17.62           C  
ANISOU  115  CB  MET A  15     2350   2145   2198  -1131    462    -35       C  
ATOM    116  CG  MET A  15       6.420  11.957   7.346  1.00 17.51           C  
ANISOU  116  CG  MET A  15     2182   2072   2399  -1059    456    -17       C  
ATOM    117  SD  MET A  15       5.118  12.126   8.589  1.00 23.13           S  
ANISOU  117  SD  MET A  15     2946   2659   3185   -992    541     99       S  
ATOM    118  CE  MET A  15       6.080  12.541  10.032  1.00 20.89           C  
ANISOU  118  CE  MET A  15     2795   2391   2752  -1060    587    176       C  
ATOM    119  N   ARG A  16       7.441  15.176   4.429  1.00 24.82           N  
ANISOU  119  N   ARG A  16     3284   3063   3082  -1215    -63    662       N  
ATOM    120  CA  ARG A  16       7.627  16.534   3.938  1.00 27.55           C  
ANISOU  120  CA  ARG A  16     3627   3345   3496  -1361   -137    831       C  
ATOM    121  C   ARG A  16       6.483  17.417   4.402  1.00 24.85           C  
ANISOU  121  C   ARG A  16     3446   2689   3306  -1333   -132    822       C  
ATOM    122  O   ARG A  16       5.320  17.145   4.094  1.00 22.35           O  
ANISOU  122  O   ARG A  16     3141   2317   3033  -1214    -71    796       O  
ATOM    123  CB  ARG A  16       7.725  16.546   2.413  1.00 27.32           C  
ANISOU  123  CB  ARG A  16     3420   3555   3405  -1406   -137    982       C  
ATOM    124  N   SER A  17       6.811  18.460   5.162  1.00 22.82           N  
ANISOU  124  N   SER A  17     3312   2224   3134  -1445   -191    836       N  
ATOM    125  CA  SER A  17       5.812  19.438   5.570  1.00 21.83           C  
ANISOU  125  CA  SER A  17     3335   1780   3181  -1427   -180    828       C  
ATOM    126  C   SER A  17       5.248  20.030   4.301  1.00 24.06           C  
ANISOU  126  C   SER A  17     3516   2084   3541  -1435   -203   1018       C  
ATOM    127  O   SER A  17       5.974  20.214   3.335  1.00 25.51           O  
ANISOU  127  O   SER A  17     3561   2473   3657  -1545   -266   1180       O  
ATOM    128  CB  SER A  17       6.432  20.538   6.430  1.00 22.89           C  
ANISOU  128  CB  SER A  17     3606   1705   3384  -1581   -245    826       C  
ATOM    129  OG  SER A  17       6.906  20.019   7.660  1.00 24.44           O  
ANISOU  129  OG  SER A  17     3903   1883   3500  -1596   -231    659       O  
ATOM    130  N   HIS A  18       3.953  20.315   4.283  1.00 26.51           N  
ANISOU  130  N   HIS A  18     3884   2198   3992  -1326   -153   1011       N  
ATOM    131  CA  HIS A  18       3.339  20.826   3.065  1.00 28.82           C  
ANISOU  131  CA  HIS A  18     4066   2519   4365  -1335   -185   1215       C  
ATOM    132  C   HIS A  18       1.992  21.497   3.296  1.00 32.22           C  
ANISOU  132  C   HIS A  18     4581   2646   5014  -1233   -147   1222       C  
ATOM    133  O   HIS A  18       1.412  21.408   4.378  1.00 29.86           O  
ANISOU  133  O   HIS A  18     4423   2136   4788  -1133    -70   1039       O  
ATOM    134  CB  HIS A  18       3.212  19.716   2.010  1.00 25.53           C  
ANISOU  134  CB  HIS A  18     3483   2431   3787  -1283   -153   1253       C  
ATOM    135  CG  HIS A  18       2.309  18.583   2.407  1.00 24.31           C  
ANISOU  135  CG  HIS A  18     3363   2286   3590  -1104    -48   1078       C  
ATOM    136  ND1 HIS A  18       2.756  17.481   3.101  1.00 21.27           N  
ANISOU  136  ND1 HIS A  18     3008   2002   3074  -1043      4    890       N  
ATOM    137  CD2 HIS A  18       0.989  18.367   2.166  1.00 21.19           C  
ANISOU  137  CD2 HIS A  18     2964   1823   3263   -982      6   1081       C  
ATOM    138  CE1 HIS A  18       1.754  16.637   3.281  1.00 21.30           C  
ANISOU  138  CE1 HIS A  18     3036   1992   3063   -896     85    777       C  
ATOM    139  NE2 HIS A  18       0.671  17.152   2.722  1.00 21.55           N  
ANISOU  139  NE2 HIS A  18     3048   1930   3210   -857     91    888       N  
ATOM    140  N   ARG A  19       1.512  22.181   2.265  1.00 34.85           N  
ANISOU  140  N   ARG A  19     4818   2967   5456  -1266   -202   1444       N  
ATOM    141  CA  ARG A  19       0.214  22.832   2.309  1.00 37.83           C  
ANISOU  141  CA  ARG A  19     5234   3072   6067  -1162   -173   1495       C  
ATOM    142  C   ARG A  19      -0.825  21.948   1.634  1.00 34.89           C  
ANISOU  142  C   ARG A  19     4752   2860   5643  -1036   -118   1522       C  
ATOM    143  O   ARG A  19      -0.499  21.159   0.742  1.00 32.02           O  
ANISOU  143  O   ARG A  19     4258   2820   5088  -1078   -135   1585       O  
ATOM    144  CB  ARG A  19       0.274  24.189   1.601  1.00 42.13           C  
ANISOU  144  CB  ARG A  19     5734   3480   6794  -1282   -283   1754       C  
ATOM    145  CG  ARG A  19       1.082  25.246   2.338  1.00 49.47           C  
ANISOU  145  CG  ARG A  19     6799   4172   7825  -1405   -335   1729       C  
ATOM    146  CD  ARG A  19       1.241  26.523   1.506  1.00 56.93           C  
ANISOU  146  CD  ARG A  19     7684   5012   8935  -1544   -463   2013       C  
ATOM    147  NE  ARG A  19       2.175  26.343   0.396  1.00 62.91           N  
ANISOU  147  NE  ARG A  19     8282   6120   9501  -1711   -566   2205       N  
ATOM    148  CZ  ARG A  19       1.825  25.943  -0.824  1.00 68.24           C  
ANISOU  148  CZ  ARG A  19     8779   7053  10094  -1723   -598   2385       C  
ATOM    149  NH1 ARG A  19       0.555  25.678  -1.102  1.00 69.04           N  
ANISOU  149  NH1 ARG A  19     8836   7103  10294  -1577   -546   2414       N  
ATOM    150  NH2 ARG A  19       2.745  25.807  -1.772  1.00 70.78           N  
ANISOU  150  NH2 ARG A  19     8963   7700  10229  -1892   -678   2536       N  
ATOM    151  N   VAL A  20      -2.071  22.066   2.082  1.00 31.82           N  
ANISOU  151  N   VAL A  20     4418   2249   5422   -887    -46   1464       N  
ATOM    152  CA  VAL A  20      -3.197  21.432   1.403  1.00 30.78           C  
ANISOU  152  CA  VAL A  20     4179   2236   5280   -780     -8   1531       C  
ATOM    153  C   VAL A  20      -4.405  22.363   1.485  1.00 30.99           C  
ANISOU  153  C   VAL A  20     4213   1959   5602   -685      5   1632       C  
ATOM    154  O   VAL A  20      -4.658  22.969   2.530  1.00 31.57           O  
ANISOU  154  O   VAL A  20     4424   1720   5851   -618     63   1497       O  
ATOM    155  CB  VAL A  20      -3.540  20.044   1.999  1.00 28.55           C  
ANISOU  155  CB  VAL A  20     3940   2076   4830   -655    100   1294       C  
ATOM    156  CG1 VAL A  20      -3.972  20.168   3.451  1.00 27.98           C  
ANISOU  156  CG1 VAL A  20     4040   1722   4871   -545    193   1065       C  
ATOM    157  CG2 VAL A  20      -4.632  19.360   1.174  1.00 28.55           C  
ANISOU  157  CG2 VAL A  20     3821   2235   4792   -575    125   1382       C  
ATOM    158  N   PRO A  21      -5.136  22.508   0.369  1.00 26.64           N  
ANISOU  158  N   PRO A  21     3509   1500   5113   -688    -48   1874       N  
ATOM    159  CA  PRO A  21      -6.327  23.358   0.386  1.00 30.85           C  
ANISOU  159  CA  PRO A  21     4019   1751   5950   -585    -39   1996       C  
ATOM    160  C   PRO A  21      -7.397  22.719   1.252  1.00 30.48           C  
ANISOU  160  C   PRO A  21     4036   1599   5945   -390    100   1786       C  
ATOM    161  O   PRO A  21      -7.562  21.504   1.228  1.00 26.16           O  
ANISOU  161  O   PRO A  21     3471   1288   5179   -348    153   1671       O  
ATOM    162  CB  PRO A  21      -6.778  23.364  -1.082  1.00 32.80           C  
ANISOU  162  CB  PRO A  21     4066   2216   6180   -657   -138   2310       C  
ATOM    163  CG  PRO A  21      -5.571  22.939  -1.867  1.00 32.70           C  
ANISOU  163  CG  PRO A  21     3992   2543   5892   -842   -216   2371       C  
ATOM    164  CD  PRO A  21      -4.878  21.951  -0.969  1.00 26.99           C  
ANISOU  164  CD  PRO A  21     3388   1910   4956   -801   -121   2056       C  
ATOM    165  N   CYS A  22      -8.102  23.532   2.023  1.00 33.77           N  
ANISOU  165  N   CYS A  22     4529   1661   6642   -277    165   1729       N  
ATOM    166  CA  CYS A  22      -9.172  23.036   2.867  1.00 33.31           C  
ANISOU  166  CA  CYS A  22     4523   1492   6642    -97    305   1535       C  
ATOM    167  C   CYS A  22     -10.128  22.161   2.061  1.00 29.57           C  
ANISOU  167  C   CYS A  22     3895   1261   6077    -34    305   1655       C  
ATOM    168  O   CYS A  22     -10.582  22.549   0.987  1.00 31.07           O  
ANISOU  168  O   CYS A  22     3929   1511   6365    -66    217   1940       O  
ATOM    169  CB  CYS A  22      -9.929  24.211   3.491  1.00 35.52           C  
ANISOU  169  CB  CYS A  22     4853   1358   7286     12    368   1527       C  
ATOM    170  SG  CYS A  22     -11.400  23.704   4.398  1.00 50.21           S  
ANISOU  170  SG  CYS A  22     6737   3093   9248    237    547   1325       S  
ATOM    171  N   GLY A  23     -10.429  20.977   2.574  1.00 27.51           N  
ANISOU  171  N   GLY A  23     3682   1147   5626     41    396   1448       N  
ATOM    172  CA  GLY A  23     -11.358  20.092   1.900  1.00 26.62           C  
ANISOU  172  CA  GLY A  23     3443   1258   5414     93    404   1537       C  
ATOM    173  C   GLY A  23     -10.679  18.963   1.149  1.00 27.37           C  
ANISOU  173  C   GLY A  23     3491   1730   5178    -19    353   1542       C  
ATOM    174  O   GLY A  23     -11.272  17.898   0.955  1.00 27.90           O  
ANISOU  174  O   GLY A  23     3520   1991   5090     24    392   1496       O  
ATOM    175  N   GLN A  24      -9.436  19.166   0.726  1.00 24.77           N  
ANISOU  175  N   GLN A  24     3164   1508   4738   -165    272   1591       N  
ATOM    176  CA  GLN A  24      -8.753  18.087   0.019  1.00 24.97           C  
ANISOU  176  CA  GLN A  24     3139   1888   4460   -265    244   1575       C  
ATOM    177  C   GLN A  24      -8.257  17.019   0.992  1.00 24.26           C  
ANISOU  177  C   GLN A  24     3179   1853   4187   -213    329   1273       C  
ATOM    178  O   GLN A  24      -8.142  17.259   2.194  1.00 22.86           O  
ANISOU  178  O   GLN A  24     3137   1456   4094   -146    387   1091       O  
ATOM    179  CB  GLN A  24      -7.585  18.616  -0.810  1.00 25.16           C  
ANISOU  179  CB  GLN A  24     3101   2040   4418   -443    136   1733       C  
ATOM    180  CG  GLN A  24      -8.004  19.617  -1.878  1.00 28.85           C  
ANISOU  180  CG  GLN A  24     3428   2489   5043   -526     29   2064       C  
ATOM    181  CD  GLN A  24      -8.965  19.025  -2.887  1.00 31.05           C  
ANISOU  181  CD  GLN A  24     3565   2994   5240   -537     12   2223       C  
ATOM    182  OE1 GLN A  24      -8.689  17.992  -3.493  1.00 31.50           O  
ANISOU  182  OE1 GLN A  24     3577   3362   5031   -608     22   2181       O  
ATOM    183  NE2 GLN A  24     -10.102  19.674  -3.069  1.00 32.96           N  
ANISOU  183  NE2 GLN A  24     3731   3076   5715   -469    -12   2407       N  
ATOM    184  N   ASN A  25      -7.972  15.839   0.456  1.00 24.67           N  
ANISOU  184  N   ASN A  25     3185   2198   3990   -252    335   1225       N  
ATOM    185  CA  ASN A  25      -7.272  14.806   1.201  1.00 22.53           C  
ANISOU  185  CA  ASN A  25     3012   2006   3541   -227    390    977       C  
ATOM    186  C   ASN A  25      -5.786  14.999   0.976  1.00 18.84           C  
ANISOU  186  C   ASN A  25     2536   1640   2981   -353    333    986       C  
ATOM    187  O   ASN A  25      -5.376  15.561  -0.037  1.00 19.39           O  
ANISOU  187  O   ASN A  25     2500   1820   3045   -472    257   1182       O  
ATOM    188  CB  ASN A  25      -7.701  13.420   0.730  1.00 16.72           C  
ANISOU  188  CB  ASN A  25     2233   1516   2605   -201    431    915       C  
ATOM    189  CG  ASN A  25      -9.193  13.244   0.748  1.00 19.93           C  
ANISOU  189  CG  ASN A  25     2617   1866   3087   -103    472    952       C  
ATOM    190  OD1 ASN A  25      -9.897  13.871   1.545  1.00 19.93           O  
ANISOU  190  OD1 ASN A  25     2673   1620   3278     -8    508    925       O  
ATOM    191  ND2 ASN A  25      -9.695  12.381  -0.129  1.00 22.26           N  
ANISOU  191  ND2 ASN A  25     2829   2395   3233   -131    474   1007       N  
ATOM    192  N   THR A  26      -4.974  14.553   1.925  1.00 18.63           N  
ANISOU  192  N   THR A  26     2613   1584   2881   -338    362    788       N  
ATOM    193  CA  THR A  26      -3.530  14.732   1.815  1.00 19.55           C  
ANISOU  193  CA  THR A  26     2716   1795   2917   -453    309    794       C  
ATOM    194  C   THR A  26      -2.813  13.540   2.432  1.00 17.57           C  
ANISOU  194  C   THR A  26     2513   1660   2502   -421    351    590       C  
ATOM    195  O   THR A  26      -3.408  12.770   3.191  1.00 17.33           O  
ANISOU  195  O   THR A  26     2563   1574   2450   -315    413    433       O  
ATOM    196  CB  THR A  26      -3.072  16.035   2.512  1.00 21.30           C  
ANISOU  196  CB  THR A  26     3023   1763   3307   -505    266    821       C  
ATOM    197  OG1 THR A  26      -1.784  16.431   2.016  1.00 19.37           O  
ANISOU  197  OG1 THR A  26     2720   1643   2998   -649    189    916       O  
ATOM    198  CG2 THR A  26      -3.017  15.841   4.026  1.00 20.53           C  
ANISOU  198  CG2 THR A  26     3088   1478   3233   -437    322    594       C  
ATOM    199  N   ARG A  27      -1.538  13.376   2.099  1.00 17.29           N  
ANISOU  199  N   ARG A  27     2419   1790   2360   -515    313    602       N  
ATOM    200  CA  ARG A  27      -0.774  12.224   2.581  1.00 20.93           C  
ANISOU  200  CA  ARG A  27     2897   2372   2685   -482    346    434       C  
ATOM    201  C   ARG A  27       0.612  12.617   3.061  1.00 20.30           C  
ANISOU  201  C   ARG A  27     2828   2290   2597   -572    293    423       C  
ATOM    202  O   ARG A  27       1.222  13.539   2.519  1.00 18.77           O  
ANISOU  202  O   ARG A  27     2574   2124   2434   -688    231    568       O  
ATOM    203  CB  ARG A  27      -0.633  11.168   1.479  1.00 23.55           C  
ANISOU  203  CB  ARG A  27     3104   2989   2856   -487    380    438       C  
ATOM    204  CG  ARG A  27      -1.857  10.282   1.307  1.00 26.20           C  
ANISOU  204  CG  ARG A  27     3455   3350   3150   -387    443    375       C  
ATOM    205  CD  ARG A  27      -2.040   9.860  -0.145  1.00 30.58           C  
ANISOU  205  CD  ARG A  27     3878   4159   3583   -449    458    469       C  
ATOM    206  NE  ARG A  27      -3.401   9.384  -0.395  1.00 33.29           N  
ANISOU  206  NE  ARG A  27     4235   4500   3913   -385    497    470       N  
ATOM    207  CZ  ARG A  27      -4.381  10.143  -0.877  1.00 35.45           C  
ANISOU  207  CZ  ARG A  27     4476   4722   4272   -409    467    634       C  
ATOM    208  NH1 ARG A  27      -4.155  11.410  -1.180  1.00 40.65           N  
ANISOU  208  NH1 ARG A  27     5091   5312   5041   -491    398    811       N  
ATOM    209  NH2 ARG A  27      -5.586   9.632  -1.069  1.00 36.17           N  
ANISOU  209  NH2 ARG A  27     4571   4829   4343   -354    501    636       N  
ATOM    210  N   PHE A  28       1.091  11.907   4.081  1.00 12.66           N  
ANISOU  210  N   PHE A  28     1932   1294   1585   -527    310    265       N  
ATOM    211  CA  PHE A  28       2.488  11.950   4.482  1.00 16.33           C  
ANISOU  211  CA  PHE A  28     2377   1819   2009   -608    261    251       C  
ATOM    212  C   PHE A  28       3.093  10.582   4.208  1.00 16.58           C  
ANISOU  212  C   PHE A  28     2315   2069   1914   -556    297    169       C  
ATOM    213  O   PHE A  28       2.422   9.564   4.365  1.00 12.52           O  
ANISOU  213  O   PHE A  28     1830   1566   1363   -446    354     59       O  
ATOM    214  CB  PHE A  28       2.623  12.271   5.971  1.00 17.96           C  
ANISOU  214  CB  PHE A  28     2739   1811   2274   -618    241    148       C  
ATOM    215  CG  PHE A  28       2.327  13.697   6.316  1.00 17.97           C  
ANISOU  215  CG  PHE A  28     2835   1585   2408   -690    209    211       C  
ATOM    216  CD1 PHE A  28       3.278  14.683   6.106  1.00 18.43           C  
ANISOU  216  CD1 PHE A  28     2866   1643   2495   -832    133    329       C  
ATOM    217  CD2 PHE A  28       1.110  14.054   6.866  1.00 22.11           C  
ANISOU  217  CD2 PHE A  28     3475   1890   3036   -617    258    150       C  
ATOM    218  CE1 PHE A  28       3.018  16.005   6.425  1.00 22.02           C  
ANISOU  218  CE1 PHE A  28     3416   1863   3087   -901    104    382       C  
ATOM    219  CE2 PHE A  28       0.841  15.385   7.192  1.00 20.65           C  
ANISOU  219  CE2 PHE A  28     3377   1469   2998   -674    242    195       C  
ATOM    220  CZ  PHE A  28       1.798  16.357   6.967  1.00 24.24           C  
ANISOU  220  CZ  PHE A  28     3814   1908   3487   -817    163    310       C  
ATOM    221  N   ILE A  29       4.356  10.558   3.795  1.00 14.43           N  
ANISOU  221  N   ILE A  29     1929   1967   1586   -634    266    222       N  
ATOM    222  CA  ILE A  29       5.039   9.301   3.501  1.00 13.27           C  
ANISOU  222  CA  ILE A  29     1676   2021   1347   -579    309    142       C  
ATOM    223  C   ILE A  29       6.404   9.311   4.160  1.00 14.94           C  
ANISOU  223  C   ILE A  29     1851   2267   1559   -635    254    142       C  
ATOM    224  O   ILE A  29       7.111  10.318   4.129  1.00 15.34           O  
ANISOU  224  O   ILE A  29     1878   2319   1633   -761    188    253       O  
ATOM    225  CB  ILE A  29       5.258   9.110   1.975  1.00 18.69           C  
ANISOU  225  CB  ILE A  29     2198   2959   1946   -620    352    216       C  
ATOM    226  CG1 ILE A  29       3.954   9.280   1.193  1.00 21.41           C  
ANISOU  226  CG1 ILE A  29     2560   3293   2282   -607    385    265       C  
ATOM    227  CG2 ILE A  29       5.952   7.776   1.670  1.00 17.75           C  
ANISOU  227  CG2 ILE A  29     1969   3030   1747   -550    420    107       C  
ATOM    228  CD1 ILE A  29       4.164   9.912  -0.206  1.00 22.38           C  
ANISOU  228  CD1 ILE A  29     2548   3609   2346   -736    373    427       C  
ATOM    229  N   LEU A  30       6.775   8.189   4.758  1.00 15.98           N  
ANISOU  229  N   LEU A  30     1972   2427   1671   -549    274     29       N  
ATOM    230  CA  LEU A  30       8.148   7.990   5.181  1.00 15.41           C  
ANISOU  230  CA  LEU A  30     1815   2443   1597   -592    227     47       C  
ATOM    231  C   LEU A  30       8.525   6.524   5.051  1.00 17.56           C  
ANISOU  231  C   LEU A  30     1987   2840   1845   -470    286    -52       C  
ATOM    232  O   LEU A  30       7.665   5.667   4.823  1.00 16.81           O  
ANISOU  232  O   LEU A  30     1926   2730   1732   -359    356   -150       O  
ATOM    233  CB  LEU A  30       8.379   8.488   6.607  1.00 17.34           C  
ANISOU  233  CB  LEU A  30     2193   2507   1890   -654    141     41       C  
ATOM    234  CG  LEU A  30       7.859   7.665   7.785  1.00 17.40           C  
ANISOU  234  CG  LEU A  30     2322   2378   1911   -568    141    -84       C  
ATOM    235  CD1 LEU A  30       8.731   7.940   8.982  1.00 18.81           C  
ANISOU  235  CD1 LEU A  30     2547   2498   2103   -668     46    -61       C  
ATOM    236  CD2 LEU A  30       6.409   7.995   8.099  1.00 14.95           C  
ANISOU  236  CD2 LEU A  30     2178   1881   1624   -530    176   -146       C  
ATOM    237  N   ASN A  31       9.815   6.242   5.178  1.00 15.71           N  
ANISOU  237  N   ASN A  31     1624   2725   1619   -491    258    -22       N  
ATOM    238  CA  ASN A  31      10.310   4.879   5.082  1.00 17.16           C  
ANISOU  238  CA  ASN A  31     1695   3012   1814   -369    314   -109       C  
ATOM    239  C   ASN A  31      11.235   4.620   6.236  1.00 17.66           C  
ANISOU  239  C   ASN A  31     1741   3032   1937   -379    227    -86       C  
ATOM    240  O   ASN A  31      12.133   5.417   6.500  1.00 17.97           O  
ANISOU  240  O   ASN A  31     1733   3114   1982   -501    150     24       O  
ATOM    241  CB  ASN A  31      11.061   4.647   3.760  1.00 18.58           C  
ANISOU  241  CB  ASN A  31     1668   3441   1952   -372    395    -89       C  
ATOM    242  CG  ASN A  31      11.554   3.209   3.613  1.00 22.89           C  
ANISOU  242  CG  ASN A  31     2091   4074   2532   -229    475   -199       C  
ATOM    243  OD1 ASN A  31      10.753   2.285   3.452  1.00 22.86           O  
ANISOU  243  OD1 ASN A  31     2142   4020   2523   -116    547   -320       O  
ATOM    244  ND2 ASN A  31      12.876   3.017   3.661  1.00 22.14           N  
ANISOU  244  ND2 ASN A  31     1826   4105   2482   -235    462   -153       N  
ATOM    245  N   VAL A  32      11.012   3.508   6.927  1.00 16.59           N  
ANISOU  245  N   VAL A  32     1709   2145   2451   -124    530   -234       N  
ATOM    246  CA  VAL A  32      11.873   3.116   8.027  1.00 17.07           C  
ANISOU  246  CA  VAL A  32     1734   2080   2670   -172    500   -208       C  
ATOM    247  C   VAL A  32      12.485   1.743   7.765  1.00 21.93           C  
ANISOU  247  C   VAL A  32     2261   2720   3352   -144    565   -305       C  
ATOM    248  O   VAL A  32      11.819   0.840   7.243  1.00 21.47           O  
ANISOU  248  O   VAL A  32     2190   2721   3249    -92    594   -443       O  
ATOM    249  CB  VAL A  32      11.123   3.108   9.386  1.00 17.59           C  
ANISOU  249  CB  VAL A  32     1882   2018   2782   -195    404   -235       C  
ATOM    250  CG1 VAL A  32       9.946   2.119   9.361  1.00 16.18           C  
ANISOU  250  CG1 VAL A  32     1722   1849   2577   -156    422   -378       C  
ATOM    251  CG2 VAL A  32      12.083   2.762  10.517  1.00 15.88           C  
ANISOU  251  CG2 VAL A  32     1649   1682   2701   -224    355   -198       C  
ATOM    252  N   GLN A  33      13.758   1.610   8.122  1.00 20.46           N  
ANISOU  252  N   GLN A  33     2002   2475   3296   -175    575   -242       N  
ATOM    253  CA  GLN A  33      14.454   0.334   8.107  1.00 22.91           C  
ANISOU  253  CA  GLN A  33     2221   2771   3712   -155    615   -327       C  
ATOM    254  C   GLN A  33      14.799  -0.034   9.551  1.00 21.49           C  
ANISOU  254  C   GLN A  33     2061   2427   3678   -189    517   -308       C  
ATOM    255  O   GLN A  33      15.476   0.727  10.247  1.00 21.67           O  
ANISOU  255  O   GLN A  33     2094   2366   3775   -228    445   -205       O  
ATOM    256  CB  GLN A  33      15.711   0.432   7.238  1.00 25.56           C  
ANISOU  256  CB  GLN A  33     2443   3180   4088   -148    718   -274       C  
ATOM    257  CG  GLN A  33      15.403   0.564   5.747  1.00 27.22           C  
ANISOU  257  CG  GLN A  33     2646   3579   4118    -82    835   -304       C  
ATOM    258  CD  GLN A  33      16.623   0.928   4.916  1.00 31.26           C  
ANISOU  258  CD  GLN A  33     3059   4169   4651    -73    967   -203       C  
ATOM    259  OE1 GLN A  33      17.733   1.086   5.445  1.00 30.01           O  
ANISOU  259  OE1 GLN A  33     2814   3907   4680   -127    967   -118       O  
ATOM    260  NE2 GLN A  33      16.424   1.068   3.604  1.00 31.28           N  
ANISOU  260  NE2 GLN A  33     3069   4353   4462      4   1084   -210       N  
ATOM    261  N  ASER A  34      14.345  -1.203   9.998  0.53 20.71           N  
ANISOU  261  N  ASER A  34     1966   2276   3627   -166    506   -405       N  
ATOM    262  N  BSER A  34      14.323  -1.195   9.990  0.47 20.73           N  
ANISOU  262  N  BSER A  34     1970   2280   3627   -166    506   -405       N  
ATOM    263  CA ASER A  34      14.479  -1.580  11.404  0.53 20.57           C  
ANISOU  263  CA ASER A  34     1998   2111   3705   -179    417   -371       C  
ATOM    264  CA BSER A  34      14.486  -1.615  11.375  0.47 20.86           C  
ANISOU  264  CA BSER A  34     2031   2150   3744   -178    420   -375       C  
ATOM    265  C  ASER A  34      14.602  -3.088  11.600  0.53 22.48           C  
ANISOU  265  C  ASER A  34     2177   2294   4068   -152    438   -455       C  
ATOM    266  C  BSER A  34      14.697  -3.113  11.480  0.47 22.83           C  
ANISOU  266  C  BSER A  34     2208   2348   4118   -151    445   -460       C  
ATOM    267  O  ASER A  34      13.779  -3.851  11.095  0.53 24.64           O  
ANISOU  267  O  ASER A  34     2425   2602   4336   -123    493   -561       O  
ATOM    268  O  BSER A  34      14.031  -3.889  10.798  0.47 24.93           O  
ANISOU  268  O  BSER A  34     2430   2664   4379   -120    508   -574       O  
ATOM    269  CB ASER A  34      13.277  -1.047  12.195  0.53 19.75           C  
ANISOU  269  CB ASER A  34     2031   1968   3506   -181    368   -346       C  
ATOM    270  CB BSER A  34      13.251  -1.229  12.190  0.47 19.93           C  
ANISOU  270  CB BSER A  34     2046   1987   3538   -177    374   -358       C  
ATOM    271  OG ASER A  34      13.390  -1.333  13.578  0.53 20.33           O  
ANISOU  271  OG ASER A  34     2177   1917   3630   -173    292   -299       O  
ATOM    272  OG BSER A  34      12.953   0.143  12.039  0.47 18.82           O  
ANISOU  272  OG BSER A  34     1967   1890   3296   -198    344   -295       O  
ATOM    273  N   LYS A  35      15.624  -3.517  12.342  1.00 21.03           N  
ANISOU  273  N   LYS A  35     1962   2010   4018   -155    379   -414       N  
ATOM    274  CA  LYS A  35      15.785  -4.933  12.672  1.00 25.93           C  
ANISOU  274  CA  LYS A  35     2527   2549   4778   -129    383   -471       C  
ATOM    275  C   LYS A  35      15.977  -5.126  14.180  1.00 23.26           C  
ANISOU  275  C   LYS A  35     2283   2065   4488   -118    279   -378       C  
ATOM    276  O   LYS A  35      16.974  -4.688  14.738  1.00 23.45           O  
ANISOU  276  O   LYS A  35     2313   2035   4560   -123    184   -313       O  
ATOM    277  CB  LYS A  35      16.939  -5.561  11.889  1.00 31.20           C  
ANISOU  277  CB  LYS A  35     3035   3241   5577   -120    424   -536       C  
ATOM    278  CG  LYS A  35      17.103  -7.049  12.155  1.00 37.07           C  
ANISOU  278  CG  LYS A  35     3703   3889   6491    -91    420   -607       C  
ATOM    279  CD  LYS A  35      17.855  -7.749  11.031  1.00 42.44           C  
ANISOU  279  CD  LYS A  35     4215   4635   7275    -67    494   -731       C  
ATOM    280  CE  LYS A  35      17.926  -9.250  11.274  1.00 46.21           C  
ANISOU  280  CE  LYS A  35     4608   5002   7949    -36    481   -815       C  
ATOM    281  NZ  LYS A  35      18.359  -9.993  10.059  1.00 51.15           N  
ANISOU  281  NZ  LYS A  35     5071   5709   8655      4    560   -982       N  
ATOM    282  N   PRO A  36      15.007  -5.771  14.845  1.00 23.02           N  
ANISOU  282  N   PRO A  36     2327   1972   4449    -95    297   -370       N  
ATOM    283  CA  PRO A  36      13.791  -6.297  14.219  1.00 23.98           C  
ANISOU  283  CA  PRO A  36     2419   2130   4562    -90    396   -459       C  
ATOM    284  C   PRO A  36      12.825  -5.206  13.769  1.00 22.82           C  
ANISOU  284  C   PRO A  36     2339   2082   4248   -106    423   -471       C  
ATOM    285  O   PRO A  36      13.010  -4.027  14.065  1.00 19.11           O  
ANISOU  285  O   PRO A  36     1951   1642   3668   -123    369   -396       O  
ATOM    286  CB  PRO A  36      13.153  -7.146  15.324  1.00 25.50           C  
ANISOU  286  CB  PRO A  36     2676   2192   4822    -63    405   -398       C  
ATOM    287  CG  PRO A  36      13.755  -6.694  16.587  1.00 25.11           C  
ANISOU  287  CG  PRO A  36     2752   2076   4713    -45    308   -265       C  
ATOM    288  CD  PRO A  36      15.111  -6.143  16.267  1.00 23.63           C  
ANISOU  288  CD  PRO A  36     2508   1921   4549    -61    221   -270       C  
ATOM    289  N   THR A  37      11.791  -5.617  13.047  1.00 23.17           N  
ANISOU  289  N   THR A  37     2338   2166   4299    -95    493   -575       N  
ATOM    290  CA  THR A  37      10.809  -4.681  12.526  1.00 24.16           C  
ANISOU  290  CA  THR A  37     2515   2381   4284   -101    509   -603       C  
ATOM    291  C   THR A  37      10.236  -3.852  13.657  1.00 21.08           C  
ANISOU  291  C   THR A  37     2268   1938   3803   -112    477   -493       C  
ATOM    292  O   THR A  37       9.931  -4.381  14.730  1.00 20.62           O  
ANISOU  292  O   THR A  37     2265   1774   3796    -97    487   -434       O  
ATOM    293  CB  THR A  37       9.687  -5.425  11.791  1.00 26.55           C  
ANISOU  293  CB  THR A  37     2743   2695   4649    -74    563   -747       C  
ATOM    294  OG1 THR A  37      10.244  -6.086  10.649  1.00 25.50           O  
ANISOU  294  OG1 THR A  37     2484   2634   4568    -45    580   -875       O  
ATOM    295  CG2 THR A  37       8.618  -4.454  11.336  1.00 27.00           C  
ANISOU  295  CG2 THR A  37     2858   2829   4571    -73    560   -776       C  
ATOM    296  N   ALA A  38      10.087  -2.552  13.408  1.00 18.07           N  
ANISOU  296  N   ALA A  38     1948   1633   3286   -129    442   -462       N  
ATOM    297  CA  ALA A  38       9.741  -1.596  14.457  1.00 18.92           C  
ANISOU  297  CA  ALA A  38     2187   1699   3301   -132    391   -372       C  
ATOM    298  C   ALA A  38       8.236  -1.465  14.678  1.00 18.84           C  
ANISOU  298  C   ALA A  38     2230   1676   3253   -121    441   -403       C  
ATOM    299  O   ALA A  38       7.447  -1.638  13.751  1.00 16.90           O  
ANISOU  299  O   ALA A  38     1920   1479   3023   -119    484   -500       O  
ATOM    300  CB  ALA A  38      10.332  -0.230  14.128  1.00 17.90           C  
ANISOU  300  CB  ALA A  38     2080   1632   3088   -158    321   -323       C  
ATOM    301  N   GLU A  39       7.848  -1.162  15.916  1.00 19.51           N  
ANISOU  301  N   GLU A  39     2431   1694   3289   -101    431   -329       N  
ATOM    302  CA  GLU A  39       6.487  -0.742  16.208  1.00 20.55           C  
ANISOU  302  CA  GLU A  39     2618   1815   3375    -90    479   -347       C  
ATOM    303  C   GLU A  39       6.346   0.685  15.712  1.00 19.65           C  
ANISOU  303  C   GLU A  39     2536   1777   3154   -110    407   -360       C  
ATOM    304  O   GLU A  39       7.266   1.493  15.872  1.00 22.98           O  
ANISOU  304  O   GLU A  39     2994   2214   3522   -120    315   -305       O  
ATOM    305  CB  GLU A  39       6.217  -0.780  17.715  1.00 25.14           C  
ANISOU  305  CB  GLU A  39     3326   2318   3907    -46    502   -256       C  
ATOM    306  CG  GLU A  39       6.430  -2.141  18.355  1.00 33.02           C  
ANISOU  306  CG  GLU A  39     4313   3229   5005    -18    573   -200       C  
ATOM    307  CD  GLU A  39       6.376  -2.083  19.868  1.00 38.51           C  
ANISOU  307  CD  GLU A  39     5163   3868   5599     47    585    -85       C  
ATOM    308  OE1 GLU A  39       6.629  -1.001  20.433  1.00 41.42           O  
ANISOU  308  OE1 GLU A  39     5646   4272   5819     74    490    -63       O  
ATOM    309  OE2 GLU A  39       6.085  -3.121  20.492  1.00 39.94           O  
ANISOU  309  OE2 GLU A  39     5353   3970   5852     81    687    -15       O  
ATOM    310  N   VAL A  40       5.193   1.006  15.132  1.00 15.61           N  
ANISOU  310  N   VAL A  40     2002   1294   2635   -112    440   -430       N  
ATOM    311  CA  VAL A  40       4.943   2.351  14.609  1.00 13.25           C  
ANISOU  311  CA  VAL A  40     1730   1057   2247   -126    370   -436       C  
ATOM    312  C   VAL A  40       3.726   2.986  15.273  1.00 14.67           C  
ANISOU  312  C   VAL A  40     1979   1198   2395   -108    383   -450       C  
ATOM    313  O   VAL A  40       2.652   2.381  15.318  1.00 15.93           O  
ANISOU  313  O   VAL A  40     2106   1320   2628    -94    467   -510       O  
ATOM    314  CB  VAL A  40       4.695   2.328  13.084  1.00 16.46           C  
ANISOU  314  CB  VAL A  40     2045   1554   2655   -132    371   -517       C  
ATOM    315  CG1 VAL A  40       4.275   3.702  12.592  1.00 17.24           C  
ANISOU  315  CG1 VAL A  40     2180   1703   2666   -138    304   -505       C  
ATOM    316  CG2 VAL A  40       5.937   1.809  12.326  1.00 15.61           C  
ANISOU  316  CG2 VAL A  40     1866   1506   2561   -139    373   -508       C  
ATOM    317  N   LYS A  41       3.897   4.205  15.783  1.00 15.05           N  
ANISOU  317  N   LYS A  41     2111   1245   2362   -107    300   -404       N  
ATOM    318  CA  LYS A  41       2.793   4.955  16.358  1.00 17.76           C  
ANISOU  318  CA  LYS A  41     2517   1559   2672    -84    303   -430       C  
ATOM    319  C   LYS A  41       2.716   6.331  15.703  1.00 19.05           C  
ANISOU  319  C   LYS A  41     2680   1761   2797   -105    198   -436       C  
ATOM    320  O   LYS A  41       3.739   6.974  15.484  1.00 16.12           O  
ANISOU  320  O   LYS A  41     2310   1408   2407   -126    109   -377       O  
ATOM    321  CB  LYS A  41       2.963   5.102  17.879  1.00 15.78           C  
ANISOU  321  CB  LYS A  41     2386   1255   2356    -37    300   -379       C  
ATOM    322  CG  LYS A  41       2.699   3.822  18.674  1.00 20.70           C  
ANISOU  322  CG  LYS A  41     3029   1827   3008     -1    432   -350       C  
ATOM    323  CD  LYS A  41       2.811   4.084  20.180  1.00 28.76           C  
ANISOU  323  CD  LYS A  41     4197   2817   3914     73    427   -293       C  
ATOM    324  CE  LYS A  41       2.387   2.862  21.002  1.00 35.98           C  
ANISOU  324  CE  LYS A  41     5144   3680   4849    120    588   -233       C  
ATOM    325  NZ  LYS A  41       0.952   2.499  20.774  1.00 39.28           N  
ANISOU  325  NZ  LYS A  41     5489   4063   5371    111    746   -275       N  
ATOM    326  N   TRP A  42       1.499   6.770  15.393  1.00 17.44           N  
ANISOU  326  N   TRP A  42     2462   1556   2607    -97    209   -501       N  
ATOM    327  CA  TRP A  42       1.269   8.057  14.735  1.00 16.50           C  
ANISOU  327  CA  TRP A  42     2341   1462   2466   -110    109   -502       C  
ATOM    328  C   TRP A  42       0.626   9.032  15.711  1.00 16.47           C  
ANISOU  328  C   TRP A  42     2411   1401   2447    -84     68   -521       C  
ATOM    329  O   TRP A  42      -0.164   8.621  16.560  1.00 17.23           O  
ANISOU  329  O   TRP A  42     2539   1456   2553    -49    154   -565       O  
ATOM    330  CB  TRP A  42       0.341   7.882  13.526  1.00 13.36           C  
ANISOU  330  CB  TRP A  42     1869   1107   2100   -106    122   -579       C  
ATOM    331  CG  TRP A  42       1.006   7.348  12.286  1.00 15.53           C  
ANISOU  331  CG  TRP A  42     2081   1468   2352   -115    122   -570       C  
ATOM    332  CD1 TRP A  42       0.974   6.054  11.822  1.00 13.26           C  
ANISOU  332  CD1 TRP A  42     1726   1204   2107   -101    194   -638       C  
ATOM    333  CD2 TRP A  42       1.774   8.092  11.331  1.00 16.56           C  
ANISOU  333  CD2 TRP A  42     2205   1671   2418   -127     58   -492       C  
ATOM    334  NE1 TRP A  42       1.682   5.951  10.648  1.00 14.85           N  
ANISOU  334  NE1 TRP A  42     1889   1503   2249    -96    173   -623       N  
ATOM    335  CE2 TRP A  42       2.185   7.188  10.324  1.00 14.23           C  
ANISOU  335  CE2 TRP A  42     1850   1460   2098   -112    103   -520       C  
ATOM    336  CE3 TRP A  42       2.156   9.437  11.230  1.00 18.74           C  
ANISOU  336  CE3 TRP A  42     2512   1941   2668   -146    -28   -395       C  
ATOM    337  CZ2 TRP A  42       2.956   7.585   9.234  1.00 16.40           C  
ANISOU  337  CZ2 TRP A  42     2108   1830   2293   -107     87   -445       C  
ATOM    338  CZ3 TRP A  42       2.924   9.829  10.154  1.00 19.06           C  
ANISOU  338  CZ3 TRP A  42     2525   2057   2660   -153    -43   -303       C  
ATOM    339  CH2 TRP A  42       3.314   8.909   9.164  1.00 19.23           C  
ANISOU  339  CH2 TRP A  42     2500   2179   2628   -130     24   -323       C  
ATOM    340  N   TYR A  43       0.939  10.317  15.568  1.00 15.18           N  
ANISOU  340  N   TYR A  43     2265   1230   2274    -95    -54   -487       N  
ATOM    341  CA  TYR A  43       0.401  11.348  16.463  1.00 16.14           C  
ANISOU  341  CA  TYR A  43     2449   1293   2390    -63   -117   -524       C  
ATOM    342  C   TYR A  43       0.000  12.599  15.692  1.00 17.26           C  
ANISOU  342  C   TYR A  43     2558   1426   2576    -81   -225   -525       C  
ATOM    343  O   TYR A  43       0.669  12.980  14.731  1.00 18.04           O  
ANISOU  343  O   TYR A  43     2612   1553   2689   -118   -283   -446       O  
ATOM    344  CB  TYR A  43       1.438  11.740  17.524  1.00 15.74           C  
ANISOU  344  CB  TYR A  43     2470   1203   2305    -40   -199   -487       C  
ATOM    345  CG  TYR A  43       1.943  10.593  18.378  1.00 17.20           C  
ANISOU  345  CG  TYR A  43     2707   1393   2435     -8   -119   -470       C  
ATOM    346  CD1 TYR A  43       1.413  10.361  19.647  1.00 18.87           C  
ANISOU  346  CD1 TYR A  43     3015   1581   2572     65    -58   -509       C  
ATOM    347  CD2 TYR A  43       2.937   9.734  17.911  1.00 14.17           C  
ANISOU  347  CD2 TYR A  43     2279   1037   2069    -43    -95   -408       C  
ATOM    348  CE1 TYR A  43       1.862   9.303  20.431  1.00 18.72           C  
ANISOU  348  CE1 TYR A  43     3055   1564   2493    105     17   -469       C  
ATOM    349  CE2 TYR A  43       3.402   8.667  18.698  1.00 14.10           C  
ANISOU  349  CE2 TYR A  43     2315   1019   2023    -10    -32   -385       C  
ATOM    350  CZ  TYR A  43       2.856   8.462  19.949  1.00 19.35           C  
ANISOU  350  CZ  TYR A  43     3085   1658   2610     64     21   -407       C  
ATOM    351  OH  TYR A  43       3.294   7.421  20.746  1.00 19.65           O  
ANISOU  351  OH  TYR A  43     3180   1685   2600    108     84   -361       O  
ATOM    352  N   HIS A  44      -1.078  13.246  16.127  1.00 17.34           N  
ANISOU  352  N   HIS A  44     2587   1391   2610    -49   -242   -603       N  
ATOM    353  CA  HIS A  44      -1.410  14.587  15.657  1.00 18.38           C  
ANISOU  353  CA  HIS A  44     2697   1487   2799    -56   -369   -602       C  
ATOM    354  C   HIS A  44      -1.411  15.522  16.860  1.00 19.32           C  
ANISOU  354  C   HIS A  44     2876   1533   2931    -16   -452   -651       C  
ATOM    355  O   HIS A  44      -2.184  15.331  17.794  1.00 17.35           O  
ANISOU  355  O   HIS A  44     2673   1267   2653     38   -383   -742       O  
ATOM    356  CB  HIS A  44      -2.773  14.626  14.974  1.00 17.73           C  
ANISOU  356  CB  HIS A  44     2566   1407   2762    -45   -347   -678       C  
ATOM    357  CG  HIS A  44      -3.208  16.009  14.590  1.00 21.52           C  
ANISOU  357  CG  HIS A  44     3029   1837   3309    -43   -484   -679       C  
ATOM    358  ND1 HIS A  44      -4.515  16.437  14.692  1.00 22.44           N  
ANISOU  358  ND1 HIS A  44     3125   1907   3495    -11   -498   -785       N  
ATOM    359  CD2 HIS A  44      -2.502  17.065  14.117  1.00 23.32           C  
ANISOU  359  CD2 HIS A  44     3247   2040   3573    -70   -612   -578       C  
ATOM    360  CE1 HIS A  44      -4.597  17.696  14.296  1.00 23.35           C  
ANISOU  360  CE1 HIS A  44     3224   1972   3674    -15   -641   -755       C  
ATOM    361  NE2 HIS A  44      -3.392  18.101  13.941  1.00 21.75           N  
ANISOU  361  NE2 HIS A  44     3027   1779   3456    -52   -708   -622       N  
ATOM    362  N   ASN A  45      -0.530  16.519  16.828  1.00 17.27           N  
ANISOU  362  N   ASN A  45     2610   1227   2725    -35   -595   -591       N  
ATOM    363  CA  ASN A  45      -0.341  17.435  17.943  1.00 22.26           C  
ANISOU  363  CA  ASN A  45     3291   1782   3386     13   -711   -655       C  
ATOM    364  C   ASN A  45      -0.257  16.736  19.298  1.00 21.68           C  
ANISOU  364  C   ASN A  45     3316   1726   3196     86   -644   -726       C  
ATOM    365  O   ASN A  45      -0.909  17.131  20.265  1.00 22.20           O  
ANISOU  365  O   ASN A  45     3444   1767   3224    161   -651   -834       O  
ATOM    366  CB  ASN A  45      -1.413  18.526  17.932  1.00 24.43           C  
ANISOU  366  CB  ASN A  45     3547   1997   3740     37   -785   -736       C  
ATOM    367  CG  ASN A  45      -1.189  19.548  16.826  1.00 29.73           C  
ANISOU  367  CG  ASN A  45     4136   2619   4539    -19   -908   -641       C  
ATOM    368  OD1 ASN A  45      -0.056  19.761  16.382  1.00 27.16           O  
ANISOU  368  OD1 ASN A  45     3774   2279   4267    -65   -966   -521       O  
ATOM    369  ND2 ASN A  45      -2.270  20.188  16.379  1.00 28.46           N  
ANISOU  369  ND2 ASN A  45     3943   2428   4444    -11   -943   -685       N  
ATOM    370  N   GLY A  46       0.564  15.695  19.360  1.00 20.07           N  
ANISOU  370  N   GLY A  46     3130   1568   2929     72   -576   -661       N  
ATOM    371  CA  GLY A  46       0.855  15.024  20.614  1.00 17.23           C  
ANISOU  371  CA  GLY A  46     2874   1223   2450    148   -530   -695       C  
ATOM    372  C   GLY A  46      -0.069  13.869  20.949  1.00 18.26           C  
ANISOU  372  C   GLY A  46     3042   1403   2492    180   -322   -714       C  
ATOM    373  O   GLY A  46       0.271  13.044  21.795  1.00 20.43           O  
ANISOU  373  O   GLY A  46     3398   1700   2665    233   -251   -695       O  
ATOM    374  N   VAL A  47      -1.231  13.806  20.297  1.00 18.05           N  
ANISOU  374  N   VAL A  47     2951   1383   2523    152   -230   -746       N  
ATOM    375  CA  VAL A  47      -2.222  12.765  20.604  1.00 18.11           C  
ANISOU  375  CA  VAL A  47     2964   1410   2506    180    -27   -769       C  
ATOM    376  C   VAL A  47      -2.176  11.601  19.600  1.00 18.26           C  
ANISOU  376  C   VAL A  47     2895   1459   2584    113     70   -715       C  
ATOM    377  O   VAL A  47      -2.249  11.805  18.388  1.00 17.31           O  
ANISOU  377  O   VAL A  47     2687   1351   2538     55     14   -712       O  
ATOM    378  CB  VAL A  47      -3.659  13.357  20.705  1.00 16.83           C  
ANISOU  378  CB  VAL A  47     2775   1216   2403    210     22   -869       C  
ATOM    379  CG1 VAL A  47      -4.693  12.251  20.854  1.00 17.45           C  
ANISOU  379  CG1 VAL A  47     2818   1293   2520    224    243   -883       C  
ATOM    380  CG2 VAL A  47      -3.753  14.339  21.877  1.00 16.78           C  
ANISOU  380  CG2 VAL A  47     2867   1188   2322    301    -47   -944       C  
ATOM    381  N   GLU A  48      -2.063  10.379  20.114  1.00 19.97           N  
ANISOU  381  N   GLU A  48     3139   1686   2765    134    211   -675       N  
ATOM    382  CA  GLU A  48      -1.914   9.212  19.270  1.00 18.44           C  
ANISOU  382  CA  GLU A  48     2858   1509   2639     81    289   -640       C  
ATOM    383  C   GLU A  48      -3.123   9.022  18.345  1.00 20.92           C  
ANISOU  383  C   GLU A  48     3058   1809   3082     54    348   -715       C  
ATOM    384  O   GLU A  48      -4.278   9.084  18.784  1.00 19.08           O  
ANISOU  384  O   GLU A  48     2812   1534   2905     86    441   -775       O  
ATOM    385  CB  GLU A  48      -1.681   7.953  20.111  1.00 17.03           C  
ANISOU  385  CB  GLU A  48     2724   1319   2426    117    433   -580       C  
ATOM    386  CG  GLU A  48      -1.377   6.730  19.249  1.00 16.75           C  
ANISOU  386  CG  GLU A  48     2590   1290   2484     65    492   -555       C  
ATOM    387  CD  GLU A  48      -1.082   5.488  20.060  1.00 19.22           C  
ANISOU  387  CD  GLU A  48     2939   1575   2790     97    622   -480       C  
ATOM    388  OE1 GLU A  48      -1.035   5.580  21.305  1.00 21.13           O  
ANISOU  388  OE1 GLU A  48     3302   1806   2921    168    666   -432       O  
ATOM    389  OE2 GLU A  48      -0.904   4.415  19.452  1.00 22.91           O  
ANISOU  389  OE2 GLU A  48     3316   2031   3359     61    677   -470       O  
ATOM    390  N   LEU A  49      -2.836   8.793  17.067  1.00 19.06           N  
ANISOU  390  N   LEU A  49     2738   1609   2893      4    289   -718       N  
ATOM    391  CA  LEU A  49      -3.864   8.632  16.042  1.00 21.80           C  
ANISOU  391  CA  LEU A  49     2980   1951   3353     -9    296   -805       C  
ATOM    392  C   LEU A  49      -4.330   7.183  15.899  1.00 20.66           C  
ANISOU  392  C   LEU A  49     2749   1776   3325     -8    432   -844       C  
ATOM    393  O   LEU A  49      -3.521   6.252  15.969  1.00 19.02           O  
ANISOU  393  O   LEU A  49     2541   1582   3102    -19    480   -791       O  
ATOM    394  CB  LEU A  49      -3.340   9.116  14.687  1.00 24.10           C  
ANISOU  394  CB  LEU A  49     3236   2309   3612    -38    159   -792       C  
ATOM    395  CG  LEU A  49      -3.149  10.622  14.477  1.00 23.17           C  
ANISOU  395  CG  LEU A  49     3160   2198   3445    -44     15   -757       C  
ATOM    396  CD1 LEU A  49      -2.434  10.897  13.157  1.00 21.11           C  
ANISOU  396  CD1 LEU A  49     2872   2012   3138    -68    -76   -697       C  
ATOM    397  CD2 LEU A  49      -4.487  11.351  14.511  1.00 26.04           C  
ANISOU  397  CD2 LEU A  49     3500   2509   3885    -19    -14   -849       C  
ATOM    398  N   GLN A  50      -5.636   7.006  15.689  1.00 15.64           N  
ANISOU  398  N   GLN A  50     2446   1387   2109   -141    393    633       N  
ATOM    399  CA  GLN A  50      -6.194   5.699  15.356  1.00 22.02           C  
ANISOU  399  CA  GLN A  50     3255   2076   3034   -196    475    644       C  
ATOM    400  C   GLN A  50      -6.805   5.706  13.952  1.00 19.26           C  
ANISOU  400  C   GLN A  50     2864   1719   2733   -299    464    537       C  
ATOM    401  O   GLN A  50      -7.216   6.750  13.442  1.00 18.47           O  
ANISOU  401  O   GLN A  50     2739   1727   2553   -314    411    510       O  
ATOM    402  CB  GLN A  50      -7.250   5.280  16.386  1.00 26.61           C  
ANISOU  402  CB  GLN A  50     3834   2623   3654   -192    562    737       C  
ATOM    403  N   GLU A  51      -6.842   4.533  13.332  1.00 20.68           N  
ANISOU  403  N   GLU A  51     3010   1793   3056   -354    520    461       N  
ATOM    404  CA  GLU A  51      -7.560   4.317  12.086  1.00 20.43           C  
ANISOU  404  CA  GLU A  51     2872   1828   3064   -423    507    275       C  
ATOM    405  C   GLU A  51      -9.009   4.795  12.262  1.00 21.80           C  
ANISOU  405  C   GLU A  51     3003   2063   3217   -467    518    258       C  
ATOM    406  O   GLU A  51      -9.640   4.495  13.266  1.00 22.20           O  
ANISOU  406  O   GLU A  51     3079   2011   3346   -485    593    345       O  
ATOM    407  CB  GLU A  51      -7.538   2.821  11.764  1.00 26.21           C  
ANISOU  407  CB  GLU A  51     3532   2404   4024   -474    592    151       C  
ATOM    408  CG  GLU A  51      -7.097   2.441  10.365  1.00 29.95           C  
ANISOU  408  CG  GLU A  51     3901   2971   4507   -489    544    -70       C  
ATOM    409  CD  GLU A  51      -5.669   2.868  10.042  1.00 28.04           C  
ANISOU  409  CD  GLU A  51     3725   2797   4132   -416    473     -9       C  
ATOM    410  OE1 GLU A  51      -4.713   2.086  10.260  1.00 30.44           O  
ANISOU  410  OE1 GLU A  51     4059   2962   4546   -398    507      9       O  
ATOM    411  OE2 GLU A  51      -5.508   3.988   9.548  1.00 27.17           O  
ANISOU  411  OE2 GLU A  51     3624   2873   3829   -373    396     27       O  
ATOM    412  N   SER A  52      -9.529   5.554  11.302  1.00 18.96           N  
ANISOU  412  N   SER A  52     2573   1890   2741   -466    450    167       N  
ATOM    413  CA  SER A  52     -10.913   6.026  11.370  1.00 19.17           C  
ANISOU  413  CA  SER A  52     2545   1996   2741   -498    452    136       C  
ATOM    414  C   SER A  52     -11.409   6.439   9.996  1.00 17.04           C  
ANISOU  414  C   SER A  52     2150   1967   2358   -474    388     -7       C  
ATOM    415  O   SER A  52     -10.701   6.294   9.011  1.00 14.55           O  
ANISOU  415  O   SER A  52     1784   1764   1981   -432    351    -82       O  
ATOM    416  CB  SER A  52     -11.042   7.208  12.331  1.00 19.31           C  
ANISOU  416  CB  SER A  52     2646   2026   2665   -459    432    310       C  
ATOM    417  OG  SER A  52     -10.355   8.334  11.809  1.00 19.60           O  
ANISOU  417  OG  SER A  52     2691   2174   2581   -390    366    373       O  
ATOM    418  N   SER A  53     -12.629   6.962   9.929  1.00 17.51           N  
ANISOU  418  N   SER A  53     2147   2137   2368   -482    377    -38       N  
ATOM    419  CA  SER A  53     -13.151   7.432   8.657  1.00 21.19           C  
ANISOU  419  CA  SER A  53     2477   2891   2684   -418    317   -146       C  
ATOM    420  C   SER A  53     -12.335   8.621   8.149  1.00 20.56           C  
ANISOU  420  C   SER A  53     2432   2945   2436   -302    274     40       C  
ATOM    421  O   SER A  53     -12.347   8.921   6.958  1.00 18.45           O  
ANISOU  421  O   SER A  53     2051   2940   2018   -207    238      3       O  
ATOM    422  CB  SER A  53     -14.608   7.833   8.795  1.00 24.59           C  
ANISOU  422  CB  SER A  53     2837   3412   3095   -435    316   -192       C  
ATOM    423  OG  SER A  53     -14.716   8.933   9.665  1.00 27.24           O  
ANISOU  423  OG  SER A  53     3279   3677   3395   -413    317     26       O  
ATOM    424  N   LYS A  54     -11.635   9.285   9.068  1.00 19.56           N  
ANISOU  424  N   LYS A  54     2436   2648   2348   -297    290    233       N  
ATOM    425  CA  LYS A  54     -10.865  10.503   8.785  1.00 23.33           C  
ANISOU  425  CA  LYS A  54     2933   3175   2755   -203    283    416       C  
ATOM    426  C   LYS A  54      -9.375  10.227   8.535  1.00 22.14           C  
ANISOU  426  C   LYS A  54     2829   2967   2618   -180    284    444       C  
ATOM    427  O   LYS A  54      -8.705  10.934   7.771  1.00 23.70           O  
ANISOU  427  O   LYS A  54     2988   3266   2750    -91    292    550       O  
ATOM    428  CB  LYS A  54     -11.000  11.455   9.980  1.00 25.91           C  
ANISOU  428  CB  LYS A  54     3334   3353   3159   -216    302    545       C  
ATOM    429  CG  LYS A  54     -10.009  12.604   9.990  1.00 25.56           C  
ANISOU  429  CG  LYS A  54     3300   3258   3152   -147    321    698       C  
ATOM    430  CD  LYS A  54     -10.344  13.604   8.918  1.00 24.54           C  
ANISOU  430  CD  LYS A  54     3066   3296   2961    -41    347    822       C  
ATOM    431  CE  LYS A  54     -10.697  14.949   9.520  1.00 24.86           C  
ANISOU  431  CE  LYS A  54     3083   3242   3120    -15    388    945       C  
ATOM    432  NZ  LYS A  54     -10.876  15.983   8.463  1.00 21.78           N  
ANISOU  432  NZ  LYS A  54     2580   2985   2709    118    448   1133       N  
ATOM    433  N   ILE A  55      -8.864   9.194   9.194  1.00 15.33           N  
ANISOU  433  N   ILE A  55     2039   1937   1851   -250    292    368       N  
ATOM    434  CA  ILE A  55      -7.433   8.932   9.255  1.00 13.67           C  
ANISOU  434  CA  ILE A  55     1888   1635   1672   -234    292    398       C  
ATOM    435  C   ILE A  55      -7.185   7.506   8.802  1.00 14.05           C  
ANISOU  435  C   ILE A  55     1906   1665   1770   -275    295    232       C  
ATOM    436  O   ILE A  55      -7.773   6.570   9.343  1.00 12.80           O  
ANISOU  436  O   ILE A  55     1750   1388   1724   -344    329    147       O  
ATOM    437  CB  ILE A  55      -6.931   9.053  10.708  1.00 17.42           C  
ANISOU  437  CB  ILE A  55     2469   1919   2229   -252    306    478       C  
ATOM    438  CG1 ILE A  55      -6.972  10.517  11.175  1.00 18.12           C  
ANISOU  438  CG1 ILE A  55     2556   2010   2318   -213    305    589       C  
ATOM    439  CG2 ILE A  55      -5.548   8.398  10.891  1.00 15.15           C  
ANISOU  439  CG2 ILE A  55     2238   1537   1983   -238    304    470       C  
ATOM    440  CD1 ILE A  55      -6.080  11.452  10.388  1.00 17.59           C  
ANISOU  440  CD1 ILE A  55     2441   1992   2253   -144    313    661       C  
ATOM    441  N   HIS A  56      -6.333   7.344   7.803  1.00 10.47           N  
ANISOU  441  N   HIS A  56     1403   1318   1256   -228    276    185       N  
ATOM    442  CA  HIS A  56      -5.968   6.018   7.345  1.00 18.12           C  
ANISOU  442  CA  HIS A  56     2322   2261   2300   -264    280     -1       C  
ATOM    443  C   HIS A  56      -4.448   5.909   7.165  1.00 20.41           C  
ANISOU  443  C   HIS A  56     2660   2505   2588   -225    272     41       C  
ATOM    444  O   HIS A  56      -3.866   6.570   6.298  1.00 18.98           O  
ANISOU  444  O   HIS A  56     2436   2494   2280   -151    254     91       O  
ATOM    445  CB  HIS A  56      -6.684   5.706   6.033  1.00 19.55           C  
ANISOU  445  CB  HIS A  56     2327   2710   2390   -240    254   -206       C  
ATOM    446  CG  HIS A  56      -6.341   4.362   5.471  1.00 30.00           C  
ANISOU  446  CG  HIS A  56     3553   4022   3824   -279    259   -463       C  
ATOM    447  ND1 HIS A  56      -6.556   3.189   6.164  1.00 30.41           N  
ANISOU  447  ND1 HIS A  56     3611   3809   4133   -379    319   -577       N  
ATOM    448  CD2 HIS A  56      -5.791   4.003   4.287  1.00 32.15           C  
ANISOU  448  CD2 HIS A  56     3698   4510   4007   -225    225   -629       C  
ATOM    449  CE1 HIS A  56      -6.156   2.167   5.430  1.00 32.87           C  
ANISOU  449  CE1 HIS A  56     3800   4144   4547   -395    323   -822       C  
ATOM    450  NE2 HIS A  56      -5.685   2.634   4.288  1.00 35.21           N  
ANISOU  450  NE2 HIS A  56     4013   4747   4619   -304    256   -876       N  
ATOM    451  N   TYR A  57      -3.794   5.090   7.987  1.00 16.94           N  
ANISOU  451  N   TYR A  57     2302   1845   2290   -262    297     41       N  
ATOM    452  CA  TYR A  57      -2.367   4.863   7.778  1.00 16.91           C  
ANISOU  452  CA  TYR A  57     2328   1805   2292   -225    285     49       C  
ATOM    453  C   TYR A  57      -2.082   3.416   7.384  1.00 20.61           C  
ANISOU  453  C   TYR A  57     2735   2198   2899   -262    306   -139       C  
ATOM    454  O   TYR A  57      -2.846   2.503   7.694  1.00 19.88           O  
ANISOU  454  O   TYR A  57     2604   1983   2969   -323    356   -236       O  
ATOM    455  CB  TYR A  57      -1.523   5.288   8.983  1.00 14.68           C  
ANISOU  455  CB  TYR A  57     2170   1371   2038   -197    289    210       C  
ATOM    456  CG  TYR A  57      -2.016   4.765  10.314  1.00 20.30           C  
ANISOU  456  CG  TYR A  57     2949   1918   2848   -219    329    275       C  
ATOM    457  CD1 TYR A  57      -1.716   3.482  10.732  1.00 22.58           C  
ANISOU  457  CD1 TYR A  57     3252   2048   3278   -226    380    253       C  
ATOM    458  CD2 TYR A  57      -2.775   5.563  11.152  1.00 22.99           C  
ANISOU  458  CD2 TYR A  57     3323   2267   3145   -218    331    374       C  
ATOM    459  CE1 TYR A  57      -2.157   3.006  11.955  1.00 31.39           C  
ANISOU  459  CE1 TYR A  57     4417   3033   4476   -216    445    368       C  
ATOM    460  CE2 TYR A  57      -3.216   5.103  12.369  1.00 28.48           C  
ANISOU  460  CE2 TYR A  57     4067   2856   3898   -216    378    453       C  
ATOM    461  CZ  TYR A  57      -2.909   3.824  12.770  1.00 32.64           C  
ANISOU  461  CZ  TYR A  57     4609   3241   4551   -207    441    469       C  
ATOM    462  OH  TYR A  57      -3.359   3.366  13.988  1.00 38.46           O  
ANISOU  462  OH  TYR A  57     5372   3909   5333   -170    513    590       O  
ATOM    463  N   THR A  58      -0.973   3.225   6.690  1.00 20.03           N  
ANISOU  463  N   THR A  58     2635   2184   2791   -224    283   -196       N  
ATOM    464  CA  THR A  58      -0.590   1.912   6.222  1.00 17.98           C  
ANISOU  464  CA  THR A  58     2294   1858   2679   -252    302   -401       C  
ATOM    465  C   THR A  58       0.868   1.689   6.559  1.00 17.72           C  
ANISOU  465  C   THR A  58     2343   1703   2685   -214    299   -325       C  
ATOM    466  O   THR A  58       1.604   2.625   6.874  1.00 14.83           O  
ANISOU  466  O   THR A  58     2063   1366   2204   -163    272   -162       O  
ATOM    467  CB  THR A  58      -0.737   1.793   4.697  1.00 21.25           C  
ANISOU  467  CB  THR A  58     2531   2562   2980   -229    262   -631       C  
ATOM    468  OG1 THR A  58       0.150   2.723   4.071  1.00 24.15           O  
ANISOU  468  OG1 THR A  58     2912   3123   3139   -143    225   -516       O  
ATOM    469  CG2 THR A  58      -2.154   2.089   4.270  1.00 27.00           C  
ANISOU  469  CG2 THR A  58     3151   3477   3629   -240    252   -724       C  
ATOM    470  N   ASN A  59       1.290   0.442   6.453  1.00 20.47           N  
ANISOU  470  N   ASN A  59     2642   1913   3223   -236    334   -467       N  
ATOM    471  CA  ASN A  59       2.639   0.066   6.819  1.00 21.84           C  
ANISOU  471  CA  ASN A  59     2884   1959   3456   -192    336   -404       C  
ATOM    472  C   ASN A  59       2.962  -1.205   6.063  1.00 17.79           C  
ANISOU  472  C   ASN A  59     2240   1389   3129   -220    363   -652       C  
ATOM    473  O   ASN A  59       2.479  -2.280   6.400  1.00 20.73           O  
ANISOU  473  O   ASN A  59     2557   1549   3770   -266    446   -731       O  
ATOM    474  CB  ASN A  59       2.704  -0.159   8.328  1.00 24.16           C  
ANISOU  474  CB  ASN A  59     3301   2025   3854   -166    389   -192       C  
ATOM    475  CG  ASN A  59       4.047  -0.674   8.791  1.00 29.50           C  
ANISOU  475  CG  ASN A  59     4031   2583   4595    -96    395   -127       C  
ATOM    476  OD1 ASN A  59       4.946  -0.930   7.987  1.00 29.43           O  
ANISOU  476  OD1 ASN A  59     3973   2624   4586    -86    363   -254       O  
ATOM    477  ND2 ASN A  59       4.196  -0.812  10.107  1.00 31.92           N  
ANISOU  477  ND2 ASN A  59     4428   2764   4935    -29    436     76       N  
ATOM    478  N   THR A  60       3.753  -1.071   5.014  1.00 18.06           N  
ANISOU  478  N   THR A  60     2203   1613   3045   -189    308   -782       N  
ATOM    479  CA  THR A  60       4.102  -2.211   4.192  1.00 20.75           C  
ANISOU  479  CA  THR A  60     2391   1944   3550   -210    322  -1066       C  
ATOM    480  C   THR A  60       5.611  -2.296   4.165  1.00 20.75           C  
ANISOU  480  C   THR A  60     2447   1910   3528   -154    298  -1017       C  
ATOM    481  O   THR A  60       6.261  -1.499   3.505  1.00 16.55           O  
ANISOU  481  O   THR A  60     1915   1607   2767   -105    241   -992       O  
ATOM    482  CB  THR A  60       3.571  -2.038   2.762  1.00 22.88           C  
ANISOU  482  CB  THR A  60     2467   2567   3658   -206    270  -1331       C  
ATOM    483  OG1 THR A  60       2.188  -1.647   2.808  1.00 29.28           O  
ANISOU  483  OG1 THR A  60     3240   3467   4417   -238    275  -1337       O  
ATOM    484  CG2 THR A  60       3.730  -3.335   1.962  1.00 23.97           C  
ANISOU  484  CG2 THR A  60     2395   2699   4012   -239    289  -1710       C  
ATOM    485  N   SER A  61       6.162  -3.239   4.920  1.00 22.24           N  
ANISOU  485  N   SER A  61     2678   1809   3963   -149    356   -978       N  
ATOM    486  CA  SER A  61       7.601  -3.491   4.906  1.00 25.53           C  
ANISOU  486  CA  SER A  61     3129   2180   4391    -91    335   -962       C  
ATOM    487  C   SER A  61       8.400  -2.217   5.141  1.00 22.53           C  
ANISOU  487  C   SER A  61     2874   1944   3741    -30    268   -761       C  
ATOM    488  O   SER A  61       9.441  -2.004   4.522  1.00 20.64           O  
ANISOU  488  O   SER A  61     2611   1824   3408      5    228   -818       O  
ATOM    489  CB  SER A  61       8.022  -4.134   3.577  1.00 28.34           C  
ANISOU  489  CB  SER A  61     3304   2674   4792   -108    312  -1288       C  
ATOM    490  OG  SER A  61       7.352  -5.368   3.367  1.00 29.53           O  
ANISOU  490  OG  SER A  61     3297   2662   5263   -171    386  -1534       O  
ATOM    491  N   GLY A  62       7.906  -1.365   6.027  1.00 19.05           N  
ANISOU  491  N   GLY A  62     2546   1489   3204    -19    266   -546       N  
ATOM    492  CA  GLY A  62       8.651  -0.175   6.392  1.00 19.30           C  
ANISOU  492  CA  GLY A  62     2667   1610   3058     34    222   -387       C  
ATOM    493  C   GLY A  62       8.212   1.071   5.656  1.00 17.77           C  
ANISOU  493  C   GLY A  62     2440   1641   2672     21    199   -359       C  
ATOM    494  O   GLY A  62       8.561   2.182   6.047  1.00 17.85           O  
ANISOU  494  O   GLY A  62     2503   1685   2594     50    189   -220       O  
ATOM    495  N   VAL A  63       7.462   0.893   4.580  1.00 16.06           N  
ANISOU  495  N   VAL A  63     2110   1587   2406    -10    201   -498       N  
ATOM    496  CA  VAL A  63       6.935   2.034   3.853  1.00 14.84           C  
ANISOU  496  CA  VAL A  63     1908   1673   2058     10    196   -431       C  
ATOM    497  C   VAL A  63       5.654   2.474   4.550  1.00 18.05           C  
ANISOU  497  C   VAL A  63     2365   2028   2467    -24    208   -328       C  
ATOM    498  O   VAL A  63       4.664   1.744   4.561  1.00 21.86           O  
ANISOU  498  O   VAL A  63     2802   2477   3029    -72    218   -443       O  
ATOM    499  CB  VAL A  63       6.609   1.693   2.394  1.00 13.13           C  
ANISOU  499  CB  VAL A  63     1520   1737   1731     29    185   -629       C  
ATOM    500  CG1 VAL A  63       6.088   2.942   1.670  1.00 14.06           C  
ANISOU  500  CG1 VAL A  63     1583   2136   1625     92    198   -491       C  
ATOM    501  CG2 VAL A  63       7.823   1.107   1.688  1.00 13.87           C  
ANISOU  501  CG2 VAL A  63     1545   1894   1831     60    174   -769       C  
ATOM    502  N   LEU A  64       5.688   3.657   5.150  1.00 17.67           N  
ANISOU  502  N   LEU A  64     2392   1959   2361     -2    215   -133       N  
ATOM    503  CA  LEU A  64       4.598   4.111   6.003  1.00 17.43           C  
ANISOU  503  CA  LEU A  64     2420   1860   2345    -31    224    -32       C  
ATOM    504  C   LEU A  64       3.887   5.259   5.337  1.00 18.35           C  
ANISOU  504  C   LEU A  64     2478   2166   2329     -6    239     57       C  
ATOM    505  O   LEU A  64       4.526   6.190   4.861  1.00 18.76           O  
ANISOU  505  O   LEU A  64     2500   2306   2322     46    264    161       O  
ATOM    506  CB  LEU A  64       5.138   4.595   7.345  1.00 16.08           C  
ANISOU  506  CB  LEU A  64     2352   1528   2229    -13    221     94       C  
ATOM    507  CG  LEU A  64       6.182   3.714   8.024  1.00 16.15           C  
ANISOU  507  CG  LEU A  64     2411   1395   2329     15    210     62       C  
ATOM    508  CD1 LEU A  64       6.617   4.371   9.328  1.00 16.25           C  
ANISOU  508  CD1 LEU A  64     2488   1345   2342     63    196    162       C  
ATOM    509  CD2 LEU A  64       5.600   2.343   8.263  1.00 14.09           C  
ANISOU  509  CD2 LEU A  64     2152   1014   2186    -14    237     -1       C  
ATOM    510  N   THR A  65       2.563   5.192   5.316  1.00 19.85           N  
ANISOU  510  N   THR A  65     2639   2409   2493    -36    238     31       N  
ATOM    511  CA  THR A  65       1.760   6.271   4.765  1.00 17.82           C  
ANISOU  511  CA  THR A  65     2323   2337   2111      6    255    137       C  
ATOM    512  C   THR A  65       0.702   6.698   5.763  1.00 17.29           C  
ANISOU  512  C   THR A  65     2319   2158   2093    -37    259    216       C  
ATOM    513  O   THR A  65       0.095   5.861   6.429  1.00 16.38           O  
ANISOU  513  O   THR A  65     2240   1921   2064    -99    250    131       O  
ATOM    514  CB  THR A  65       1.071   5.835   3.474  1.00 21.62           C  
ANISOU  514  CB  THR A  65     2656   3102   2457     40    240     -9       C  
ATOM    515  OG1 THR A  65       2.071   5.532   2.488  1.00 22.96           O  
ANISOU  515  OG1 THR A  65     2745   3427   2551     98    238    -82       O  
ATOM    516  CG2 THR A  65       0.182   6.948   2.961  1.00 27.26           C  
ANISOU  516  CG2 THR A  65     3302   4030   3023    114    263    136       C  
ATOM    517  N   LEU A  66       0.495   8.007   5.874  1.00 17.03           N  
ANISOU  517  N   LEU A  66     2286   2155   2032      1    289    385       N  
ATOM    518  CA  LEU A  66      -0.612   8.547   6.643  1.00 13.83           C  
ANISOU  518  CA  LEU A  66     1911   1691   1653    -28    293    449       C  
ATOM    519  C   LEU A  66      -1.474   9.401   5.732  1.00 18.27           C  
ANISOU  519  C   LEU A  66     2375   2465   2102     37    320    541       C  
ATOM    520  O   LEU A  66      -0.977  10.328   5.078  1.00 18.91           O  
ANISOU  520  O   LEU A  66     2397   2635   2153    119    374    690       O  
ATOM    521  CB  LEU A  66      -0.115   9.398   7.808  1.00 15.16           C  
ANISOU  521  CB  LEU A  66     2146   1682   1932    -33    308    546       C  
ATOM    522  CG  LEU A  66      -1.230  10.190   8.493  1.00 15.99           C  
ANISOU  522  CG  LEU A  66     2255   1759   2061    -49    319    612       C  
ATOM    523  CD1 LEU A  66      -2.136   9.247   9.271  1.00 15.47           C  
ANISOU  523  CD1 LEU A  66     2245   1637   1994   -110    288    529       C  
ATOM    524  CD2 LEU A  66      -0.651  11.276   9.411  1.00 16.15           C  
ANISOU  524  CD2 LEU A  66     2272   1659   2206    -32    339    657       C  
ATOM    525  N   GLU A  67      -2.758   9.072   5.661  1.00 15.86           N  
ANISOU  525  N   GLU A  67     2035   2248   1744     12    297    465       N  
ATOM    526  CA  GLU A  67      -3.697   9.888   4.907  1.00 15.80           C  
ANISOU  526  CA  GLU A  67     1927   2464   1613     92    317    558       C  
ATOM    527  C   GLU A  67      -4.661  10.592   5.844  1.00 16.95           C  
ANISOU  527  C   GLU A  67     2119   2490   1833     55    326    639       C  
ATOM    528  O   GLU A  67      -5.204   9.978   6.764  1.00 18.56           O  
ANISOU  528  O   GLU A  67     2388   2553   2111    -38    298    535       O  
ATOM    529  CB  GLU A  67      -4.488   9.054   3.894  1.00 17.16           C  
ANISOU  529  CB  GLU A  67     1971   2912   1636    119    275    367       C  
ATOM    530  CG  GLU A  67      -5.556   9.868   3.177  1.00 19.50           C  
ANISOU  530  CG  GLU A  67     2149   3486   1772    228    287    461       C  
ATOM    531  CD  GLU A  67      -6.450   9.018   2.306  1.00 28.81           C  
ANISOU  531  CD  GLU A  67     3172   4969   2806    256    231    204       C  
ATOM    532  OE1 GLU A  67      -6.531   7.801   2.547  1.00 28.67           O  
ANISOU  532  OE1 GLU A  67     3150   4848   2894    146    194    -63       O  
ATOM    533  OE2 GLU A  67      -7.078   9.568   1.379  1.00 31.78           O  
ANISOU  533  OE2 GLU A  67     3406   5692   2976    399    233    263       O  
ATOM    534  N   ILE A  68      -4.865  11.884   5.611  1.00 16.24           N  
ANISOU  534  N   ILE A  68     1688   1498   2984   -100    364    687       N  
ATOM    535  CA  ILE A  68      -5.923  12.626   6.288  1.00 16.94           C  
ANISOU  535  CA  ILE A  68     1854   1474   3108      4    434    747       C  
ATOM    536  C   ILE A  68      -6.957  13.069   5.246  1.00 20.28           C  
ANISOU  536  C   ILE A  68     2181   1943   3583     11    458    868       C  
ATOM    537  O   ILE A  68      -6.613  13.713   4.246  1.00 20.61           O  
ANISOU  537  O   ILE A  68     2166   2007   3660    -65    401    918       O  
ATOM    538  CB  ILE A  68      -5.375  13.882   7.040  1.00 17.02           C  
ANISOU  538  CB  ILE A  68     2007   1320   3139     54    382    675       C  
ATOM    539  CG1 ILE A  68      -4.196  13.510   7.950  1.00 17.75           C  
ANISOU  539  CG1 ILE A  68     2182   1388   3174     28    339    550       C  
ATOM    540  CG2 ILE A  68      -6.477  14.546   7.858  1.00 16.72           C  
ANISOU  540  CG2 ILE A  68     2038   1218   3097    246    435    659       C  
ATOM    541  CD1 ILE A  68      -2.834  13.866   7.374  1.00 16.36           C  
ANISOU  541  CD1 ILE A  68     2000   1187   3029   -126    234    549       C  
ATOM    542  N   LEU A  69      -8.218  12.720   5.473  1.00 17.52           N  
ANISOU  542  N   LEU A  69     1793   1628   3234     98    535    947       N  
ATOM    543  CA  LEU A  69      -9.284  13.053   4.530  1.00 16.20           C  
ANISOU  543  CA  LEU A  69     1523   1517   3114    111    559   1067       C  
ATOM    544  C   LEU A  69      -9.982  14.361   4.886  1.00 17.60           C  
ANISOU  544  C   LEU A  69     1775   1573   3338    232    595   1119       C  
ATOM    545  O   LEU A  69     -10.117  14.706   6.059  1.00 21.83           O  
ANISOU  545  O   LEU A  69     2407   2052   3834    379    622   1038       O  
ATOM    546  CB  LEU A  69     -10.317  11.919   4.445  1.00 15.40           C  
ANISOU  546  CB  LEU A  69     1307   1538   3005    143    583   1134       C  
ATOM    547  CG  LEU A  69      -9.881  10.572   3.843  1.00 17.73           C  
ANISOU  547  CG  LEU A  69     1532   1912   3292     72    473   1072       C  
ATOM    548  CD1 LEU A  69      -8.966   9.799   4.799  1.00 17.91           C  
ANISOU  548  CD1 LEU A  69     1615   1905   3287     52    447    969       C  
ATOM    549  CD2 LEU A  69     -11.083   9.717   3.479  1.00 20.95           C  
ANISOU  549  CD2 LEU A  69     1833   2382   3745     86    442   1186       C  
ATOM    550  N   ASP A  70     -10.414  15.082   3.860  1.00 16.08           N  
ANISOU  550  N   ASP A  70     1520   1368   3222    193    576   1231       N  
ATOM    551  CA  ASP A  70     -11.308  16.219   4.031  1.00 19.26           C  
ANISOU  551  CA  ASP A  70     1956   1669   3692    332    592   1283       C  
ATOM    552  C   ASP A  70     -10.746  17.207   5.043  1.00 21.63           C  
ANISOU  552  C   ASP A  70     2420   1775   4024    447    521   1137       C  
ATOM    553  O   ASP A  70     -11.377  17.519   6.054  1.00 23.35           O  
ANISOU  553  O   ASP A  70     2707   1968   4198    660    562   1054       O  
ATOM    554  CB  ASP A  70     -12.699  15.726   4.448  1.00 19.69           C  
ANISOU  554  CB  ASP A  70     1943   1844   3693    473    707   1355       C  
ATOM    555  CG  ASP A  70     -13.748  16.803   4.356  1.00 24.84           C  
ANISOU  555  CG  ASP A  70     2588   2439   4410    623    729   1429       C  
ATOM    556  OD1 ASP A  70     -13.447  17.892   3.809  1.00 26.00           O  
ANISOU  556  OD1 ASP A  70     2773   2428   4676    592    637   1443       O  
ATOM    557  OD2 ASP A  70     -14.878  16.552   4.821  1.00 26.24           O  
ANISOU  557  OD2 ASP A  70     2705   2738   4529    771    827   1494       O  
ATOM    558  N   CYS A  71      -9.559  17.717   4.736  1.00 23.09           N  
ANISOU  558  N   CYS A  71     2653   1842   4279    313    397   1110       N  
ATOM    559  CA  CYS A  71      -8.784  18.505   5.681  1.00 24.48           C  
ANISOU  559  CA  CYS A  71     2989   1815   4497    381    283    957       C  
ATOM    560  C   CYS A  71      -9.434  19.823   6.051  1.00 26.29           C  
ANISOU  560  C   CYS A  71     3308   1832   4847    565    197    910       C  
ATOM    561  O   CYS A  71      -9.836  20.597   5.184  1.00 28.71           O  
ANISOU  561  O   CYS A  71     3557   2050   5300    523    131   1052       O  
ATOM    562  CB  CYS A  71      -7.381  18.755   5.129  1.00 18.36           C  
ANISOU  562  CB  CYS A  71     2208    977   3792    163    148    998       C  
ATOM    563  SG  CYS A  71      -6.390  17.266   5.049  1.00 23.84           S  
ANISOU  563  SG  CYS A  71     2837   1893   4328     19    216    959       S  
ATOM    564  N   HIS A  72      -9.528  20.080   7.347  1.00 26.17           N  
ANISOU  564  N   HIS A  72     3428   1746   4768    786    184    704       N  
ATOM    565  CA  HIS A  72     -10.003  21.370   7.819  1.00 28.76           C  
ANISOU  565  CA  HIS A  72     3867   1850   5211   1008     56    586       C  
ATOM    566  C   HIS A  72      -8.998  21.974   8.792  1.00 30.94           C  
ANISOU  566  C   HIS A  72     4323   1909   5523   1071   -127    357       C  
ATOM    567  O   HIS A  72      -7.950  21.384   9.061  1.00 27.94           O  
ANISOU  567  O   HIS A  72     3969   1573   5073    924   -134    321       O  
ATOM    568  CB  HIS A  72     -11.386  21.236   8.449  1.00 34.54           C  
ANISOU  568  CB  HIS A  72     4568   2749   5806   1305    207    530       C  
ATOM    569  CG  HIS A  72     -12.466  20.931   7.460  1.00 41.85           C  
ANISOU  569  CG  HIS A  72     5327   3824   6749   1256    335    763       C  
ATOM    570  ND1 HIS A  72     -13.162  21.913   6.786  1.00 47.78           N  
ANISOU  570  ND1 HIS A  72     6052   4433   7670   1314    261    852       N  
ATOM    571  CD2 HIS A  72     -12.968  19.750   7.022  1.00 43.89           C  
ANISOU  571  CD2 HIS A  72     5434   4348   6893   1150    508    928       C  
ATOM    572  CE1 HIS A  72     -14.046  21.354   5.980  1.00 48.03           C  
ANISOU  572  CE1 HIS A  72     5920   4659   7669   1246    403   1063       C  
ATOM    573  NE2 HIS A  72     -13.947  20.041   6.103  1.00 47.33           N  
ANISOU  573  NE2 HIS A  72     5757   4811   7414   1145    544   1106       N  
ATOM    574  N   THR A  73      -9.312  23.153   9.316  1.00 33.19           N  
ANISOU  574  N   THR A  73     4733   1953   5926   1298   -297    189       N  
ATOM    575  CA  THR A  73      -8.372  23.867  10.168  1.00 34.98           C  
ANISOU  575  CA  THR A  73     5141   1921   6229   1360   -533    -43       C  
ATOM    576  C   THR A  73      -7.858  23.008  11.315  1.00 33.06           C  
ANISOU  576  C   THR A  73     4956   1876   5729   1433   -428   -225       C  
ATOM    577  O   THR A  73      -6.679  23.067  11.647  1.00 31.88           O  
ANISOU  577  O   THR A  73     4896   1601   5618   1303   -568   -301       O  
ATOM    578  CB  THR A  73      -8.983  25.157  10.723  1.00 41.05           C  
ANISOU  578  CB  THR A  73     6043   2423   7131   1681   -737   -267       C  
ATOM    579  OG1 THR A  73      -9.497  25.934   9.635  1.00 46.28           O  
ANISOU  579  OG1 THR A  73     6636   2897   8053   1603   -841    -67       O  
ATOM    580  CG2 THR A  73      -7.929  25.963  11.464  1.00 42.41           C  
ANISOU  580  CG2 THR A  73     6408   2267   7438   1710  -1050   -504       C  
ATOM    581  N   ASP A  74      -8.742  22.214  11.914  1.00 33.10           N  
ANISOU  581  N   ASP A  74     4892   2204   5481   1630   -193   -261       N  
ATOM    582  CA  ASP A  74      -8.373  21.369  13.044  1.00 34.29           C  
ANISOU  582  CA  ASP A  74     5065   2586   5379   1712    -88   -394       C  
ATOM    583  C   ASP A  74      -7.268  20.401  12.669  1.00 28.57           C  
ANISOU  583  C   ASP A  74     4292   1917   4645   1380    -46   -258       C  
ATOM    584  O   ASP A  74      -6.518  19.947  13.525  1.00 30.24           O  
ANISOU  584  O   ASP A  74     4560   2199   4730   1379    -51   -375       O  
ATOM    585  CB  ASP A  74      -9.574  20.566  13.542  1.00 41.33           C  
ANISOU  585  CB  ASP A  74     5822   3863   6020   1918    163   -339       C  
ATOM    586  CG  ASP A  74     -10.473  21.367  14.456  1.00 55.05           C  
ANISOU  586  CG  ASP A  74     7612   5664   7642   2343    139   -563       C  
ATOM    587  OD1 ASP A  74     -10.089  22.493  14.849  1.00 58.59           O  
ANISOU  587  OD1 ASP A  74     8231   5832   8197   2500    -95   -822       O  
ATOM    588  OD2 ASP A  74     -11.563  20.856  14.793  1.00 60.52           O  
ANISOU  588  OD2 ASP A  74     8161   6699   8134   2530    336   -480       O  
ATOM    589  N   ASP A  75      -7.183  20.077  11.385  1.00 27.29           N  
ANISOU  589  N   ASP A  75     4015   1750   4605   1118     -8    -17       N  
ATOM    590  CA  ASP A  75      -6.212  19.099  10.902  1.00 25.33           C  
ANISOU  590  CA  ASP A  75     3694   1595   4334    837     35    105       C  
ATOM    591  C   ASP A  75      -4.819  19.677  10.701  1.00 25.17           C  
ANISOU  591  C   ASP A  75     3754   1355   4455    646   -171     84       C  
ATOM    592  O   ASP A  75      -3.869  18.943  10.447  1.00 26.28           O  
ANISOU  592  O   ASP A  75     3843   1583   4558    446   -152    149       O  
ATOM    593  CB  ASP A  75      -6.727  18.440   9.622  1.00 23.61           C  
ANISOU  593  CB  ASP A  75     3302   1520   4147    674    156    343       C  
ATOM    594  CG  ASP A  75      -8.065  17.761   9.834  1.00 26.81           C  
ANISOU  594  CG  ASP A  75     3611   2150   4426    829    342    402       C  
ATOM    595  OD1 ASP A  75      -8.173  16.987  10.812  1.00 23.84           O  
ANISOU  595  OD1 ASP A  75     3228   1944   3885    928    435    341       O  
ATOM    596  OD2 ASP A  75      -9.016  18.031   9.058  1.00 26.99           O  
ANISOU  596  OD2 ASP A  75     3549   2188   4517    850    384    531       O  
ATOM    597  N   SER A  76      -4.696  20.996  10.812  1.00 29.12           N  
ANISOU  597  N   SER A  76     4369   1564   5131    711   -389      1       N  
ATOM    598  CA  SER A  76      -3.386  21.631  10.730  1.00 28.60           C  
ANISOU  598  CA  SER A  76     4373   1267   5225    525   -628      5       C  
ATOM    599  C   SER A  76      -2.525  21.210  11.915  1.00 28.48           C  
ANISOU  599  C   SER A  76     4468   1286   5068    567   -651   -194       C  
ATOM    600  O   SER A  76      -3.036  20.707  12.921  1.00 24.96           O  
ANISOU  600  O   SER A  76     4065   1001   4418    789   -521   -365       O  
ATOM    601  CB  SER A  76      -3.521  23.155  10.703  1.00 31.90           C  
ANISOU  601  CB  SER A  76     4899   1317   5904    602   -910    -49       C  
ATOM    602  OG  SER A  76      -4.057  23.587   9.466  1.00 33.27           O  
ANISOU  602  OG  SER A  76     4948   1447   6246    491   -925    198       O  
ATOM    603  N   GLY A  77      -1.217  21.417  11.792  1.00 29.12           N  
ANISOU  603  N   GLY A  77     4571   1244   5250    349   -820   -144       N  
ATOM    604  CA  GLY A  77      -0.306  21.169  12.893  1.00 29.08           C  
ANISOU  604  CA  GLY A  77     4676   1233   5140    371   -883   -326       C  
ATOM    605  C   GLY A  77       0.679  20.039  12.644  1.00 28.18           C  
ANISOU  605  C   GLY A  77     4455   1339   4914    149   -768   -201       C  
ATOM    606  O   GLY A  77       0.977  19.696  11.499  1.00 26.56           O  
ANISOU  606  O   GLY A  77     4096   1238   4758    -60   -718     28       O  
ATOM    607  N   THR A  78       1.188  19.461  13.730  1.00 19.00           N  
ANISOU  607  N   THR A  78     3363    266   3589    215   -733   -362       N  
ATOM    608  CA  THR A  78       2.297  18.528  13.646  1.00 19.07           C  
ANISOU  608  CA  THR A  78     3296    430   3521     19   -680   -277       C  
ATOM    609  C   THR A  78       1.798  17.096  13.579  1.00 22.89           C  
ANISOU  609  C   THR A  78     3658   1213   3824     50   -418   -227       C  
ATOM    610  O   THR A  78       0.994  16.678  14.417  1.00 22.38           O  
ANISOU  610  O   THR A  78     3623   1264   3618    248   -299   -334       O  
ATOM    611  CB  THR A  78       3.209  18.652  14.875  1.00 24.87           C  
ANISOU  611  CB  THR A  78     4166   1090   4193     53   -809   -461       C  
ATOM    612  OG1 THR A  78       3.685  19.996  14.981  1.00 30.17           O  
ANISOU  612  OG1 THR A  78     4958   1438   5065     22  -1107   -519       O  
ATOM    613  CG2 THR A  78       4.385  17.709  14.759  1.00 28.73           C  
ANISOU  613  CG2 THR A  78     4564   1736   4614   -147   -762   -360       C  
ATOM    614  N   TYR A  79       2.283  16.357  12.581  1.00 18.21           N  
ANISOU  614  N   TYR A  79     2917    759   3242   -138   -353    -58       N  
ATOM    615  CA  TYR A  79       2.076  14.922  12.501  1.00 16.72           C  
ANISOU  615  CA  TYR A  79     2619    808   2927   -137   -173    -23       C  
ATOM    616  C   TYR A  79       3.396  14.237  12.756  1.00 19.75           C  
ANISOU  616  C   TYR A  79     2978   1267   3259   -261   -208    -33       C  
ATOM    617  O   TYR A  79       4.417  14.614  12.190  1.00 22.42           O  
ANISOU  617  O   TYR A  79     3279   1574   3665   -420   -317     44       O  
ATOM    618  CB  TYR A  79       1.496  14.532  11.144  1.00 17.13           C  
ANISOU  618  CB  TYR A  79     2517    971   3021   -204    -88    130       C  
ATOM    619  CG  TYR A  79       0.065  14.980  11.033  1.00 19.15           C  
ANISOU  619  CG  TYR A  79     2785   1188   3304    -62    -23    144       C  
ATOM    620  CD1 TYR A  79      -0.978  14.148  11.417  1.00 20.54           C  
ANISOU  620  CD1 TYR A  79     2921   1496   3389     65    121    138       C  
ATOM    621  CD2 TYR A  79      -0.242  16.267  10.606  1.00 17.75           C  
ANISOU  621  CD2 TYR A  79     2650    836   3257    -54   -126    181       C  
ATOM    622  CE1 TYR A  79      -2.303  14.584  11.346  1.00 21.78           C  
ANISOU  622  CE1 TYR A  79     3072   1645   3559    206    184    166       C  
ATOM    623  CE2 TYR A  79      -1.541  16.704  10.536  1.00 19.37           C  
ANISOU  623  CE2 TYR A  79     2864   1006   3488     96    -72    186       C  
ATOM    624  CZ  TYR A  79      -2.567  15.871  10.898  1.00 20.05           C  
ANISOU  624  CZ  TYR A  79     2905   1256   3458    230     93    176       C  
ATOM    625  OH  TYR A  79      -3.859  16.339  10.815  1.00 24.36           O  
ANISOU  625  OH  TYR A  79     3442   1794   4021    384    149    199       O  
ATOM    626  N   ARG A  80       3.382  13.250  13.639  1.00 13.26           N  
ANISOU  626  N   ARG A  80     2161    558   2319   -190   -123   -103       N  
ATOM    627  CA  ARG A  80       4.620  12.619  14.060  1.00 16.65           C  
ANISOU  627  CA  ARG A  80     2580   1045   2700   -285   -163   -127       C  
ATOM    628  C   ARG A  80       4.506  11.104  14.007  1.00 16.94           C  
ANISOU  628  C   ARG A  80     2501   1254   2681   -284    -56    -90       C  
ATOM    629  O   ARG A  80       3.529  10.526  14.486  1.00 16.83           O  
ANISOU  629  O   ARG A  80     2468   1305   2621   -175     36    -82       O  
ATOM    630  CB  ARG A  80       4.991  13.076  15.474  1.00 20.51           C  
ANISOU  630  CB  ARG A  80     3216   1458   3120   -203   -237   -269       C  
ATOM    631  CG  ARG A  80       6.196  12.358  16.067  1.00 22.33           C  
ANISOU  631  CG  ARG A  80     3435   1762   3288   -289   -269   -289       C  
ATOM    632  CD  ARG A  80       6.393  12.734  17.521  1.00 27.03           C  
ANISOU  632  CD  ARG A  80     4166   2322   3782   -181   -331   -438       C  
ATOM    633  NE  ARG A  80       6.484  14.181  17.690  1.00 36.81           N  
ANISOU  633  NE  ARG A  80     5546   3346   5094   -149   -498   -542       N  
ATOM    634  CZ  ARG A  80       7.587  14.894  17.465  1.00 40.98           C  
ANISOU  634  CZ  ARG A  80     6118   3720   5732   -303   -682   -525       C  
ATOM    635  NH1 ARG A  80       8.690  14.290  17.049  1.00 39.78           N  
ANISOU  635  NH1 ARG A  80     5867   3654   5593   -485   -690   -408       N  
ATOM    636  NH2 ARG A  80       7.589  16.212  17.650  1.00 44.44           N  
ANISOU  636  NH2 ARG A  80     6688   3918   6278   -271   -880   -616       N  
ATOM    637  N   ALA A  81       5.493  10.465  13.390  1.00 15.05           N  
ANISOU  637  N   ALA A  81     2167   1097   2453   -400    -87    -53       N  
ATOM    638  CA  ALA A  81       5.573   9.021  13.413  1.00 15.72           C  
ANISOU  638  CA  ALA A  81     2152   1307   2512   -386    -43    -48       C  
ATOM    639  C   ALA A  81       6.726   8.652  14.322  1.00 16.69           C  
ANISOU  639  C   ALA A  81     2309   1446   2587   -426    -96    -96       C  
ATOM    640  O   ALA A  81       7.799   9.279  14.274  1.00 16.42           O  
ANISOU  640  O   ALA A  81     2299   1402   2537   -501   -175   -101       O  
ATOM    641  CB  ALA A  81       5.782   8.460  12.004  1.00 15.85           C  
ANISOU  641  CB  ALA A  81     2022   1450   2552   -415    -50    -10       C  
ATOM    642  N   VAL A  82       6.494   7.663  15.176  1.00 15.55           N  
ANISOU  642  N   VAL A  82     2152   1335   2422   -381    -65   -100       N  
ATOM    643  CA  VAL A  82       7.511   7.220  16.114  1.00 16.26           C  
ANISOU  643  CA  VAL A  82     2262   1452   2463   -414   -113   -130       C  
ATOM    644  C   VAL A  82       7.713   5.728  15.930  1.00 15.24           C  
ANISOU  644  C   VAL A  82     2009   1387   2393   -426   -130    -96       C  
ATOM    645  O   VAL A  82       6.781   4.941  16.074  1.00 13.23           O  
ANISOU  645  O   VAL A  82     1695   1146   2187   -376   -103    -31       O  
ATOM    646  CB  VAL A  82       7.120   7.528  17.573  1.00 19.17           C  
ANISOU  646  CB  VAL A  82     2724   1831   2730   -327    -88   -156       C  
ATOM    647  CG1 VAL A  82       8.137   6.923  18.525  1.00 18.77           C  
ANISOU  647  CG1 VAL A  82     2671   1835   2626   -367   -136   -166       C  
ATOM    648  CG2 VAL A  82       7.005   9.054  17.798  1.00 20.10           C  
ANISOU  648  CG2 VAL A  82     2984   1847   2807   -284   -123   -245       C  
ATOM    649  N   CYS A  83       8.932   5.350  15.578  1.00 17.08           N  
ANISOU  649  N   CYS A  83     2189   1687   2616   -456   -189   -120       N  
ATOM    650  CA  CYS A  83       9.242   3.966  15.271  1.00 18.66           C  
ANISOU  650  CA  CYS A  83     2276   1930   2883   -425   -240   -122       C  
ATOM    651  C   CYS A  83      10.123   3.398  16.360  1.00 18.44           C  
ANISOU  651  C   CYS A  83     2256   1907   2842   -458   -289   -115       C  
ATOM    652  O   CYS A  83      11.169   3.972  16.666  1.00 19.06           O  
ANISOU  652  O   CYS A  83     2381   2015   2845   -510   -307   -139       O  
ATOM    653  CB  CYS A  83       9.975   3.888  13.939  1.00 17.60           C  
ANISOU  653  CB  CYS A  83     2060   1880   2748   -417   -272   -174       C  
ATOM    654  SG  CYS A  83       9.024   4.549  12.544  1.00 18.20           S  
ANISOU  654  SG  CYS A  83     2101   1980   2833   -401   -226   -170       S  
ATOM    655  N   THR A  84       9.714   2.265  16.926  1.00 16.44           N  
ANISOU  655  N   THR A  84     1943   1623   2679   -445   -330    -59       N  
ATOM    656  CA  THR A  84      10.383   1.719  18.108  1.00 16.41           C  
ANISOU  656  CA  THR A  84     1932   1627   2674   -496   -378    -17       C  
ATOM    657  C   THR A  84      10.711   0.230  17.993  1.00 16.84           C  
ANISOU  657  C   THR A  84     1872   1649   2877   -467   -497     12       C  
ATOM    658  O   THR A  84       9.870  -0.564  17.578  1.00 17.10           O  
ANISOU  658  O   THR A  84     1831   1614   3051   -430   -555     58       O  
ATOM    659  CB  THR A  84       9.504   1.905  19.362  1.00 17.51           C  
ANISOU  659  CB  THR A  84     2104   1808   2742   -479   -317     96       C  
ATOM    660  OG1 THR A  84       9.199   3.299  19.532  1.00 21.45           O  
ANISOU  660  OG1 THR A  84     2727   2323   3099   -450   -232     33       O  
ATOM    661  CG2 THR A  84      10.227   1.396  20.601  1.00 18.94           C  
ANISOU  661  CG2 THR A  84     2263   2053   2878   -511   -360    163       C  
ATOM    662  N   ASN A  85      11.933  -0.136  18.366  1.00 16.85           N  
ANISOU  662  N   ASN A  85     1858   1677   2866   -485   -556    -15       N  
ATOM    663  CA  ASN A  85      12.301  -1.535  18.597  1.00 17.74           C  
ANISOU  663  CA  ASN A  85     1871   1729   3142   -469   -694     24       C  
ATOM    664  C   ASN A  85      13.222  -1.612  19.809  1.00 20.18           C  
ANISOU  664  C   ASN A  85     2184   2092   3394   -545   -715     85       C  
ATOM    665  O   ASN A  85      13.543  -0.576  20.399  1.00 21.47           O  
ANISOU  665  O   ASN A  85     2433   2334   3390   -606   -630     72       O  
ATOM    666  CB  ASN A  85      12.905  -2.210  17.351  1.00 15.24           C  
ANISOU  666  CB  ASN A  85     1490   1381   2919   -367   -788   -123       C  
ATOM    667  CG  ASN A  85      14.360  -1.820  17.078  1.00 19.19           C  
ANISOU  667  CG  ASN A  85     1992   2001   3299   -361   -768   -225       C  
ATOM    668  OD1 ASN A  85      15.008  -1.116  17.861  1.00 15.78           O  
ANISOU  668  OD1 ASN A  85     1619   1638   2737   -443   -707   -174       O  
ATOM    669  ND2 ASN A  85      14.881  -2.298  15.951  1.00 16.31           N  
ANISOU  669  ND2 ASN A  85     1546   1679   2973   -262   -837   -376       N  
ATOM    670  N   TYR A  86      13.647  -2.810  20.197  1.00 21.31           N  
ANISOU  670  N   TYR A  86     2231   2177   3687   -547   -849    147       N  
ATOM    671  CA  TYR A  86      14.402  -2.939  21.444  1.00 21.96           C  
ANISOU  671  CA  TYR A  86     2296   2330   3719   -630   -872    241       C  
ATOM    672  C   TYR A  86      15.746  -2.217  21.400  1.00 25.58           C  
ANISOU  672  C   TYR A  86     2824   2877   4019   -642   -827    127       C  
ATOM    673  O   TYR A  86      16.324  -1.920  22.442  1.00 26.51           O  
ANISOU  673  O   TYR A  86     2967   3076   4031   -715   -814    184       O  
ATOM    674  CB  TYR A  86      14.578  -4.406  21.852  1.00 26.34           C  
ANISOU  674  CB  TYR A  86     2716   2789   4501   -636  -1051    362       C  
ATOM    675  CG  TYR A  86      15.744  -5.126  21.202  1.00 25.49           C  
ANISOU  675  CG  TYR A  86     2572   2613   4499   -553  -1172    223       C  
ATOM    676  CD1 TYR A  86      16.974  -5.218  21.844  1.00 29.29           C  
ANISOU  676  CD1 TYR A  86     3038   3168   4924   -588  -1196    233       C  
ATOM    677  CD2 TYR A  86      15.606  -5.733  19.958  1.00 22.05           C  
ANISOU  677  CD2 TYR A  86     2101   2059   4217   -430  -1274     69       C  
ATOM    678  CE1 TYR A  86      18.042  -5.886  21.266  1.00 29.11           C  
ANISOU  678  CE1 TYR A  86     2958   3112   4992   -499  -1307    102       C  
ATOM    679  CE2 TYR A  86      16.657  -6.392  19.370  1.00 23.09           C  
ANISOU  679  CE2 TYR A  86     2175   2168   4431   -329  -1396    -93       C  
ATOM    680  CZ  TYR A  86      17.883  -6.467  20.026  1.00 27.98           C  
ANISOU  680  CZ  TYR A  86     2770   2871   4989   -360  -1408    -72       C  
ATOM    681  OH  TYR A  86      18.942  -7.141  19.447  1.00 25.94           O  
ANISOU  681  OH  TYR A  86     2431   2621   4804   -239  -1535   -239       O  
ATOM    682  N   LYS A  87      16.235  -1.919  20.198  1.00 27.96           N  
ANISOU  682  N   LYS A  87     3141   3190   4294   -568   -807    -12       N  
ATOM    683  CA  LYS A  87      17.529  -1.250  20.049  1.00 29.02           C  
ANISOU  683  CA  LYS A  87     3300   3434   4293   -596   -779    -71       C  
ATOM    684  C   LYS A  87      17.446   0.264  20.233  1.00 28.84           C  
ANISOU  684  C   LYS A  87     3397   3461   4099   -673   -681    -70       C  
ATOM    685  O   LYS A  87      18.428   0.896  20.613  1.00 26.82           O  
ANISOU  685  O   LYS A  87     3177   3270   3743   -747   -688    -61       O  
ATOM    686  CB  LYS A  87      18.162  -1.572  18.696  1.00 28.29           C  
ANISOU  686  CB  LYS A  87     3119   3398   4231   -500   -814   -197       C  
ATOM    687  CG  LYS A  87      18.469  -3.045  18.499  1.00 31.42           C  
ANISOU  687  CG  LYS A  87     3399   3730   4809   -399   -961   -259       C  
ATOM    688  CD  LYS A  87      19.540  -3.540  19.474  1.00 35.25           C  
ANISOU  688  CD  LYS A  87     3846   4237   5310   -445  -1032   -194       C  
ATOM    689  CE  LYS A  87      20.935  -3.098  19.066  1.00 39.45           C  
ANISOU  689  CE  LYS A  87     4328   4959   5703   -442  -1012   -252       C  
ATOM    690  NZ  LYS A  87      21.993  -3.813  19.853  1.00 41.26           N  
ANISOU  690  NZ  LYS A  87     4491   5207   5979   -456  -1106   -208       N  
ATOM    691  N   GLY A  88      16.281   0.841  19.960  1.00 26.59           N  
ANISOU  691  N   GLY A  88     3171   3129   3803   -658   -614    -77       N  
ATOM    692  CA  GLY A  88      16.102   2.278  20.095  1.00 27.40           C  
ANISOU  692  CA  GLY A  88     3392   3234   3785   -715   -558    -96       C  
ATOM    693  C   GLY A  88      14.852   2.798  19.407  1.00 24.62           C  
ANISOU  693  C   GLY A  88     3075   2830   3450   -668   -491   -117       C  
ATOM    694  O   GLY A  88      13.932   2.033  19.094  1.00 24.95           O  
ANISOU  694  O   GLY A  88     3059   2836   3586   -606   -480    -99       O  
ATOM    695  N   GLU A  89      14.806   4.105  19.168  1.00 21.58           N  
ANISOU  695  N   GLU A  89     2779   2424   2995   -705   -468   -142       N  
ATOM    696  CA  GLU A  89      13.665   4.682  18.464  1.00 28.62           C  
ANISOU  696  CA  GLU A  89     3700   3266   3908   -662   -410   -155       C  
ATOM    697  C   GLU A  89      14.109   5.725  17.461  1.00 30.74           C  
ANISOU  697  C   GLU A  89     3972   3550   4157   -705   -425   -146       C  
ATOM    698  O   GLU A  89      15.166   6.335  17.616  1.00 31.62           O  
ANISOU  698  O   GLU A  89     4104   3678   4232   -792   -492   -122       O  
ATOM    699  CB  GLU A  89      12.709   5.351  19.439  1.00 34.37           C  
ANISOU  699  CB  GLU A  89     4549   3921   4590   -651   -380   -183       C  
ATOM    700  CG  GLU A  89      12.983   6.828  19.584  1.00 42.37           C  
ANISOU  700  CG  GLU A  89     5691   4859   5549   -690   -428   -240       C  
ATOM    701  CD  GLU A  89      11.908   7.538  20.361  1.00 50.07           C  
ANISOU  701  CD  GLU A  89     6782   5791   6450   -582   -392   -298       C  
ATOM    702  OE1 GLU A  89      11.199   6.866  21.148  1.00 52.38           O  
ANISOU  702  OE1 GLU A  89     7046   6174   6682   -491   -325   -269       O  
ATOM    703  OE2 GLU A  89      11.774   8.766  20.177  1.00 51.86           O  
ANISOU  703  OE2 GLU A  89     7112   5906   6685   -581   -446   -360       O  
ATOM    704  N   ALA A  90      13.289   5.920  16.432  1.00 27.05           N  
ANISOU  704  N   ALA A  90     3470   3081   3727   -664   -379   -141       N  
ATOM    705  CA  ALA A  90      13.454   7.020  15.489  1.00 24.78           C  
ANISOU  705  CA  ALA A  90     3174   2803   3438   -726   -402    -99       C  
ATOM    706  C   ALA A  90      12.119   7.739  15.350  1.00 22.98           C  
ANISOU  706  C   ALA A  90     3021   2468   3243   -686   -357   -108       C  
ATOM    707  O   ALA A  90      11.069   7.105  15.273  1.00 18.69           O  
ANISOU  707  O   ALA A  90     2458   1917   2726   -601   -287   -130       O  
ATOM    708  CB  ALA A  90      13.930   6.513  14.129  1.00 20.94           C  
ANISOU  708  CB  ALA A  90     2523   2481   2953   -725   -400    -78       C  
ATOM    709  N   SER A  91      12.161   9.065  15.341  1.00 22.93           N  
ANISOU  709  N   SER A  91     3095   2363   3255   -751   -420    -82       N  
ATOM    710  CA  SER A  91      10.956   9.856  15.176  1.00 26.18           C  
ANISOU  710  CA  SER A  91     3579   2657   3710   -705   -395    -97       C  
ATOM    711  C   SER A  91      11.127  10.841  14.042  1.00 25.91           C  
ANISOU  711  C   SER A  91     3492   2611   3740   -795   -459      8       C  
ATOM    712  O   SER A  91      12.223  11.366  13.797  1.00 25.00           O  
ANISOU  712  O   SER A  91     3337   2520   3644   -921   -569     97       O  
ATOM    713  CB  SER A  91      10.607  10.610  16.458  1.00 31.72           C  
ANISOU  713  CB  SER A  91     4461   3191   4402   -668   -444   -200       C  
ATOM    714  OG  SER A  91      10.456   9.711  17.540  1.00 37.89           O  
ANISOU  714  OG  SER A  91     5269   4019   5109   -602   -388   -269       O  
ATOM    715  N   ASP A  92      10.030  11.087  13.348  1.00 21.68           N  
ANISOU  715  N   ASP A  92     2939   2052   3248   -745   -401     27       N  
ATOM    716  CA  ASP A  92      10.015  12.064  12.287  1.00 22.56           C  
ANISOU  716  CA  ASP A  92     2990   2148   3434   -834   -465    154       C  
ATOM    717  C   ASP A  92       8.738  12.860  12.467  1.00 19.40           C  
ANISOU  717  C   ASP A  92     2701   1564   3104   -757   -455    114       C  
ATOM    718  O   ASP A  92       7.682  12.296  12.751  1.00 17.68           O  
ANISOU  718  O   ASP A  92     2514   1349   2854   -632   -338     35       O  
ATOM    719  CB  ASP A  92      10.033  11.356  10.931  1.00 20.86           C  
ANISOU  719  CB  ASP A  92     2582   2164   3181   -846   -393    230       C  
ATOM    720  CG  ASP A  92      10.052  12.321   9.766  1.00 24.72           C  
ANISOU  720  CG  ASP A  92     2961   2705   3727   -954   -453    409       C  
ATOM    721  OD1 ASP A  92      10.593  13.440   9.921  1.00 23.92           O  
ANISOU  721  OD1 ASP A  92     2891   2485   3710  -1075   -594    522       O  
ATOM    722  OD2 ASP A  92       9.512  11.959   8.696  1.00 23.53           O  
ANISOU  722  OD2 ASP A  92     2681   2712   3547   -921   -378    448       O  
ATOM    723  N   TYR A  93       8.834  14.172  12.331  1.00 19.04           N  
ANISOU  723  N   TYR A  93     2710   1350   3173   -832   -597    181       N  
ATOM    724  CA  TYR A  93       7.638  15.002  12.376  1.00 23.01           C  
ANISOU  724  CA  TYR A  93     3312   1666   3764   -744   -608    142       C  
ATOM    725  C   TYR A  93       7.587  15.930  11.168  1.00 23.08           C  
ANISOU  725  C   TYR A  93     3222   1642   3905   -861   -702    337       C  
ATOM    726  O   TYR A  93       8.610  16.236  10.555  1.00 22.65           O  
ANISOU  726  O   TYR A  93     3051   1663   3892  -1030   -811    511       O  
ATOM    727  CB  TYR A  93       7.566  15.800  13.680  1.00 26.22           C  
ANISOU  727  CB  TYR A  93     3932   1819   4211   -663   -733    -26       C  
ATOM    728  CG  TYR A  93       8.506  16.985  13.738  1.00 29.21           C  
ANISOU  728  CG  TYR A  93     4363   1997   4737   -802   -994     35       C  
ATOM    729  N   ALA A  94       6.385  16.359  10.816  1.00 23.34           N  
ANISOU  729  N   ALA A  94     3280   1586   4002   -776   -659    338       N  
ATOM    730  CA  ALA A  94       6.218  17.314   9.735  1.00 19.98           C  
ANISOU  730  CA  ALA A  94     2761   1109   3721   -883   -761    540       C  
ATOM    731  C   ALA A  94       4.954  18.102  10.020  1.00 21.84           C  
ANISOU  731  C   ALA A  94     3130   1103   4065   -743   -783    455       C  
ATOM    732  O   ALA A  94       4.144  17.698  10.856  1.00 20.20           O  
ANISOU  732  O   ALA A  94     3041    862   3773   -555   -668    262       O  
ATOM    733  CB  ALA A  94       6.125  16.594   8.394  1.00 18.07           C  
ANISOU  733  CB  ALA A  94     2296   1177   3391   -936   -627    694       C  
ATOM    734  N   THR A  95       4.795  19.224   9.330  1.00 20.64           N  
ANISOU  734  N   THR A  95     2943    799   4101   -829   -938    619       N  
ATOM    735  CA  THR A  95       3.705  20.147   9.596  1.00 25.00           C  
ANISOU  735  CA  THR A  95     3628   1078   4792   -687  -1011    537       C  
ATOM    736  C   THR A  95       2.730  20.152   8.432  1.00 26.75           C  
ANISOU  736  C   THR A  95     3709   1416   5039   -687   -899    701       C  
ATOM    737  O   THR A  95       3.142  20.155   7.271  1.00 28.73           O  
ANISOU  737  O   THR A  95     3760   1845   5309   -864   -911    952       O  
ATOM    738  CB  THR A  95       4.257  21.579   9.816  1.00 28.68           C  
ANISOU  738  CB  THR A  95     4185   1191   5519   -778  -1350    587       C  
ATOM    739  OG1 THR A  95       5.110  21.574  10.965  1.00 32.91           O  
ANISOU  739  OG1 THR A  95     4866   1614   6024   -761  -1468    405       O  
ATOM    740  CG2 THR A  95       3.136  22.568  10.045  1.00 33.75           C  
ANISOU  740  CG2 THR A  95     4958   1546   6321   -595  -1459    476       C  
ATOM    741  N   LEU A  96       1.439  20.125   8.739  1.00 25.75           N  
ANISOU  741  N   LEU A  96     3660   1241   4882   -477   -786    567       N  
ATOM    742  CA  LEU A  96       0.419  20.278   7.714  1.00 25.05           C  
ANISOU  742  CA  LEU A  96     3457   1221   4840   -465   -704    717       C  
ATOM    743  C   LEU A  96      -0.181  21.659   7.844  1.00 29.50           C  
ANISOU  743  C   LEU A  96     4122   1457   5629   -382   -898    711       C  
ATOM    744  O   LEU A  96      -0.641  22.044   8.921  1.00 30.01           O  
ANISOU  744  O   LEU A  96     4367   1332   5701   -165   -948    469       O  
ATOM    745  CB  LEU A  96      -0.689  19.230   7.859  1.00 23.80           C  
ANISOU  745  CB  LEU A  96     3281   1259   4502   -294   -448    613       C  
ATOM    746  CG  LEU A  96      -1.753  19.222   6.754  1.00 25.83           C  
ANISOU  746  CG  LEU A  96     3405   1625   4786   -291   -349    771       C  
ATOM    747  CD1 LEU A  96      -1.136  18.827   5.427  1.00 25.65           C  
ANISOU  747  CD1 LEU A  96     3171   1843   4732   -499   -333    987       C  
ATOM    748  CD2 LEU A  96      -2.898  18.282   7.101  1.00 26.18           C  
ANISOU  748  CD2 LEU A  96     3449   1815   4684   -116   -138    670       C  
ATOM    749  N   ASP A  97      -0.165  22.401   6.742  1.00 31.31           N  
ANISOU  749  N   ASP A  97     4222   1638   6038   -542  -1020    978       N  
ATOM    750  CA  ASP A  97      -0.769  23.718   6.689  1.00 33.47           C  
ANISOU  750  CA  ASP A  97     4565   1580   6571   -480  -1232   1013       C  
ATOM    751  C   ASP A  97      -1.999  23.678   5.787  1.00 32.01           C  
ANISOU  751  C   ASP A  97     4261   1518   6383   -423  -1084   1144       C  
ATOM    752  O   ASP A  97      -1.875  23.664   4.563  1.00 32.46           O  
ANISOU  752  O   ASP A  97     4113   1753   6469   -615  -1068   1437       O  
ATOM    753  CB  ASP A  97       0.247  24.746   6.172  1.00 33.99           C  
ANISOU  753  CB  ASP A  97     4560   1450   6905   -737  -1551   1274       C  
ATOM    754  CG  ASP A  97      -0.302  26.152   6.165  1.00 43.46           C  
ANISOU  754  CG  ASP A  97     5841   2239   8434   -681  -1837   1309       C  
ATOM    755  OD1 ASP A  97      -1.263  26.406   6.922  1.00 46.61           O  
ANISOU  755  OD1 ASP A  97     6414   2458   8836   -391  -1822   1026       O  
ATOM    756  OD2 ASP A  97       0.229  27.008   5.409  1.00 46.33           O  
ANISOU  756  OD2 ASP A  97     6080   2469   9057   -918  -2093   1632       O  
ATOM    757  N   VAL A  98      -3.182  23.643   6.396  1.00 32.72           N  
ANISOU  757  N   VAL A  98     4462   1552   6416   -151   -974    935       N  
ATOM    758  CA  VAL A  98      -4.438  23.632   5.649  1.00 32.23           C  
ANISOU  758  CA  VAL A  98     4299   1593   6355    -75   -839   1048       C  
ATOM    759  C   VAL A  98      -4.826  25.062   5.253  1.00 34.86           C  
ANISOU  759  C   VAL A  98     4645   1603   6997    -70  -1090   1170       C  
ATOM    760  O   VAL A  98      -5.072  25.900   6.117  1.00 37.56           O  
ANISOU  760  O   VAL A  98     5166   1629   7478    127  -1268    961       O  
ATOM    761  CB  VAL A  98      -5.588  22.997   6.469  1.00 29.30           C  
ANISOU  761  CB  VAL A  98     4009   1334   5790    216   -618    816       C  
ATOM    762  CG1 VAL A  98      -6.839  22.856   5.611  1.00 30.59           C  
ANISOU  762  CG1 VAL A  98     4038   1641   5942    261   -469    969       C  
ATOM    763  CG2 VAL A  98      -5.171  21.636   7.038  1.00 24.52           C  
ANISOU  763  CG2 VAL A  98     3403    990   4925    213   -425    699       C  
ATOM    764  N   THR A  99      -4.882  25.328   3.949  1.00 36.59           N  
ANISOU  764  N   THR A  99     4667   1912   7324   -273  -1118   1502       N  
ATOM    765  CA  THR A  99      -5.105  26.680   3.428  1.00 44.48           C  
ANISOU  765  CA  THR A  99     5637   2608   8658   -331  -1392   1699       C  
ATOM    766  C   THR A  99      -6.464  26.846   2.753  1.00 51.16           C  
ANISOU  766  C   THR A  99     6392   3514   9531   -223  -1279   1804       C  
ATOM    767  O   THR A  99      -7.253  25.907   2.671  1.00 45.43           O  
ANISOU  767  O   THR A  99     5624   3073   8564   -112   -989   1732       O  
ATOM    768  CB  THR A  99      -4.052  27.039   2.366  1.00 44.30           C  
ANISOU  768  CB  THR A  99     5405   2658   8771   -685  -1561   2095       C  
ATOM    769  OG1 THR A  99      -4.221  26.183   1.229  1.00 41.88           O  
ANISOU  769  OG1 THR A  99     4861   2806   8248   -812  -1316   2312       O  
ATOM    770  CG2 THR A  99      -2.644  26.876   2.921  1.00 41.70           C  
ANISOU  770  CG2 THR A  99     5126   2301   8416   -823  -1679   2047       C  
ATOM    771  N   GLY A 100      -6.725  28.051   2.254  1.00 31.39           N  
ATOM    772  CA  GLY A 100      -7.897  28.289   1.436  1.00 33.72           C  
ATOM    773  C   GLY A 100      -7.753  27.567   0.106  1.00 39.73           C  
ATOM    774  O   GLY A 100      -6.636  27.353  -0.376  1.00 36.19           O  
ATOM    775  N   GLY A 101      -8.883  27.190  -0.488  1.00 45.81           N  
ATOM    776  CA  GLY A 101      -8.888  26.429  -1.728  1.00 45.82           C  
ATOM    777  C   GLY A 101      -8.030  27.043  -2.817  1.00 44.26           C  
ATOM    778  O   GLY A 101      -7.995  26.544  -3.942  1.00 44.41           O  
TER     779      GLY A 101                                                      
ATOM    780  N   GLY B   1      -1.784   2.146  34.238  1.00 69.62           N  
ATOM    781  CA  GLY B   1      -1.550   2.832  35.495  1.00 67.85           C  
ATOM    782  C   GLY B   1      -2.680   3.775  35.856  1.00 66.63           C  
ATOM    783  O   GLY B   1      -3.786   3.332  36.169  1.00 66.32           O  
ATOM    784  N   PRO B   2      -2.410   5.089  35.810  1.00 66.26           N  
ATOM    785  CA  PRO B   2      -3.407   6.106  36.164  1.00 63.41           C  
ATOM    786  C   PRO B   2      -4.466   6.283  35.075  1.00 58.54           C  
ATOM    787  O   PRO B   2      -5.600   6.653  35.377  1.00 59.24           O  
ATOM    788  CB  PRO B   2      -2.566   7.378  36.300  1.00 64.02           C  
ATOM    789  CG  PRO B   2      -1.432   7.171  35.358  1.00 64.88           C  
ATOM    790  CD  PRO B   2      -1.128   5.691  35.398  1.00 66.06           C  
ATOM    791  N   PHE B   3      -4.097   6.019  33.825  1.00 52.21           N  
ATOM    792  CA  PHE B   3      -5.018   6.191  32.703  1.00 48.16           C  
ATOM    793  C   PHE B   3      -5.430   4.843  32.116  1.00 42.31           C  
ATOM    794  O   PHE B   3      -5.752   4.739  30.927  1.00 41.26           O  
ATOM    795  CB  PHE B   3      -4.382   7.074  31.629  1.00 45.05           C  
ATOM    796  CG  PHE B   3      -3.806   8.350  32.167  1.00 42.40           C  
ATOM    797  CD1 PHE B   3      -4.474   9.065  33.148  1.00 41.62           C  
ATOM    798  CD2 PHE B   3      -2.588   8.824  31.711  1.00 41.75           C  
ATOM    799  CE1 PHE B   3      -3.941  10.239  33.653  1.00 42.51           C  
ATOM    800  CE2 PHE B   3      -2.050   9.995  32.212  1.00 41.95           C  
ATOM    801  CZ  PHE B   3      -2.725  10.703  33.185  1.00 42.00           C  
ATOM    802  N   THR B   4      -5.414   3.819  32.966  1.00 59.41           N  
ANISOU  802  N   THR B   4     7649   6069   8856    -44  -2641    588       N  
ATOM    803  CA  THR B   4      -5.760   2.464  32.563  1.00 54.26           C  
ANISOU  803  CA  THR B   4     6965   5330   8323     -3  -2634    629       C  
ATOM    804  C   THR B   4      -7.247   2.343  32.241  1.00 48.08           C  
ANISOU  804  C   THR B   4     6300   4628   7342    -37  -2426    633       C  
ATOM    805  O   THR B   4      -7.624   1.704  31.259  1.00 45.25           O  
ANISOU  805  O   THR B   4     5855   4248   7090      8  -2295    582       O  
ATOM    806  CB  THR B   4      -5.371   1.431  33.652  1.00 60.21           C  
ANISOU  806  CB  THR B   4     7795   5960   9122    -17  -2904    779       C  
ATOM    807  N   LEU B   5      -8.085   2.962  33.066  1.00 45.49           N  
ANISOU  807  N   LEU B   5     6162   4389   6733   -119  -2394    685       N  
ATOM    808  CA  LEU B   5      -9.535   2.916  32.871  1.00 43.51           C  
ANISOU  808  CA  LEU B   5     6024   4214   6294   -157  -2202    689       C  
ATOM    809  C   LEU B   5     -10.015   3.752  31.678  1.00 40.04           C  
ANISOU  809  C   LEU B   5     5494   3873   5848   -130  -1960    557       C  
ATOM    810  O   LEU B   5     -11.115   3.526  31.168  1.00 43.73           O  
ANISOU  810  O   LEU B   5     5994   4382   6240   -137  -1798    542       O  
ATOM    811  CB  LEU B   5     -10.266   3.352  34.146  1.00 43.85           C  
ANISOU  811  CB  LEU B   5     6295   4318   6050   -260  -2231    773       C  
ATOM    812  N   ASP B   6      -9.206   4.713  31.231  1.00 32.82           N  
ANISOU  812  N   ASP B   6     4467   2990   5013   -103  -1940    466       N  
ATOM    813  CA  ASP B   6      -9.594   5.551  30.090  1.00 28.17           C  
ANISOU  813  CA  ASP B   6     3799   2488   4416    -83  -1724    351       C  
ATOM    814  C   ASP B   6     -10.112   4.692  28.940  1.00 29.48           C  
ANISOU  814  C   ASP B   6     3882   2633   4685    -39  -1595    311       C  
ATOM    815  O   ASP B   6      -9.553   3.634  28.650  1.00 31.80           O  
ANISOU  815  O   ASP B   6     4085   2829   5169      6  -1670    318       O  
ATOM    816  CB  ASP B   6      -8.431   6.413  29.604  1.00 21.76           C  
ANISOU  816  CB  ASP B   6     2845   1680   3741    -51  -1733    259       C  
ATOM    817  CG  ASP B   6      -8.095   7.540  30.569  1.00 23.46           C  
ANISOU  817  CG  ASP B   6     3143   1943   3828   -103  -1812    272       C  
ATOM    818  OD1 ASP B   6      -8.732   7.609  31.642  1.00 23.45           O  
ANISOU  818  OD1 ASP B   6     3313   1969   3628   -166  -1864    352       O  
ATOM    819  OD2 ASP B   6      -7.192   8.348  30.257  1.00 22.90           O  
ANISOU  819  OD2 ASP B   6     2967   1880   3854    -86  -1817    197       O  
ATOM    820  N   HIS B   7     -11.180   5.146  28.292  1.00 27.13           N  
ANISOU  820  N   HIS B   7     3616   2423   4269    -54  -1405    267       N  
ATOM    821  CA  HIS B   7     -11.751   4.416  27.159  1.00 28.18           C  
ANISOU  821  CA  HIS B   7     3681   2549   4479    -22  -1277    222       C  
ATOM    822  C   HIS B   7     -12.482   5.333  26.180  1.00 24.94           C  
ANISOU  822  C   HIS B   7     3252   2241   3983    -28  -1081    141       C  
ATOM    823  O   HIS B   7     -12.972   6.401  26.554  1.00 17.32           O  
ANISOU  823  O   HIS B   7     2366   1354   2862    -65  -1030    143       O  
ATOM    824  CB  HIS B   7     -12.685   3.292  27.636  1.00 32.62           C  
ANISOU  824  CB  HIS B   7     4344   3073   4977    -44  -1298    309       C  
ATOM    825  CG  HIS B   7     -13.955   3.777  28.272  1.00 37.18           C  
ANISOU  825  CG  HIS B   7     5077   3729   5319   -108  -1222    356       C  
ATOM    826  ND1 HIS B   7     -14.065   4.011  29.626  1.00 39.05           N  
ANISOU  826  ND1 HIS B   7     5459   3971   5408   -166  -1320    440       N  
ATOM    827  CD2 HIS B   7     -15.168   4.053  27.740  1.00 39.20           C  
ANISOU  827  CD2 HIS B   7     5363   4059   5471   -126  -1057    324       C  
ATOM    828  CE1 HIS B   7     -15.293   4.422  29.900  1.00 40.53           C  
ANISOU  828  CE1 HIS B   7     5755   4231   5415   -219  -1202    450       C  
ATOM    829  NE2 HIS B   7     -15.984   4.454  28.776  1.00 41.18           N  
ANISOU  829  NE2 HIS B   7     5765   4354   5530   -191  -1046    383       N  
ATOM    830  N   ALA B   8     -12.545   4.904  24.924  1.00 25.03           N  
ANISOU  830  N   ALA B   8     3163   2246   4102      5   -977     69       N  
ATOM    831  CA  ALA B   8     -13.237   5.657  23.885  1.00 22.65           C  
ANISOU  831  CA  ALA B   8     2845   2034   3729     -3   -805      0       C  
ATOM    832  C   ALA B   8     -14.723   5.789  24.233  1.00 18.48           C  
ANISOU  832  C   ALA B   8     2439   1565   3017    -42   -735     50       C  
ATOM    833  O   ALA B   8     -15.262   4.973  24.965  1.00 17.86           O  
ANISOU  833  O   ALA B   8     2439   1452   2895    -60   -788    123       O  
ATOM    834  CB  ALA B   8     -13.051   4.987  22.536  1.00 21.21           C  
ANISOU  834  CB  ALA B   8     2548   1825   3685     27   -719    -81       C  
ATOM    835  N   PRO B   9     -15.387   6.848  23.737  1.00 16.29           N  
ANISOU  835  N   PRO B   9     2178   1374   2637    -59   -616     13       N  
ATOM    836  CA  PRO B   9     -16.804   7.007  24.086  1.00 16.50           C  
ANISOU  836  CA  PRO B   9     2306   1451   2514    -94   -547     53       C  
ATOM    837  C   PRO B   9     -17.629   5.813  23.609  1.00 20.92           C  
ANISOU  837  C   PRO B   9     2862   1986   3100    -91   -507     64       C  
ATOM    838  O   PRO B   9     -17.288   5.161  22.616  1.00 19.60           O  
ANISOU  838  O   PRO B   9     2607   1791   3050    -63   -483     16       O  
ATOM    839  CB  PRO B   9     -17.211   8.287  23.341  1.00 16.65           C  
ANISOU  839  CB  PRO B   9     2304   1549   2473    -99   -432     -2       C  
ATOM    840  CG  PRO B   9     -15.931   9.055  23.190  1.00 14.92           C  
ANISOU  840  CG  PRO B   9     2020   1324   2322    -82   -468    -45       C  
ATOM    841  CD  PRO B   9     -14.869   7.986  22.969  1.00 14.99           C  
ANISOU  841  CD  PRO B   9     1947   1256   2492    -51   -548    -60       C  
ATOM    842  N   ARG B  10     -18.692   5.507  24.338  1.00 18.57           N  
ANISOU  842  N   ARG B  10     2662   1696   2698   -127   -494    123       N  
ATOM    843  CA  ARG B  10     -19.601   4.455  23.931  1.00 20.45           C  
ANISOU  843  CA  ARG B  10     2901   1914   2953   -132   -447    133       C  
ATOM    844  C   ARG B  10     -21.033   4.922  24.168  1.00 21.00           C  
ANISOU  844  C   ARG B  10     3043   2044   2894   -172   -351    148       C  
ATOM    845  O   ARG B  10     -21.346   5.441  25.242  1.00 20.94           O  
ANISOU  845  O   ARG B  10     3126   2053   2777   -209   -360    189       O  
ATOM    846  CB  ARG B  10     -19.315   3.176  24.732  1.00 24.51           C  
ANISOU  846  CB  ARG B  10     3458   2339   3517   -138   -554    204       C  
ATOM    847  N   ILE B  11     -21.893   4.744  23.170  1.00 18.42           N  
ANISOU  847  N   ILE B  11     2670   1746   2581   -167   -260    109       N  
ATOM    848  CA  ILE B  11     -23.306   5.082  23.312  1.00 19.00           C  
ANISOU  848  CA  ILE B  11     2789   1865   2564   -201   -171    118       C  
ATOM    849  C   ILE B  11     -24.032   3.982  24.095  1.00 20.34           C  
ANISOU  849  C   ILE B  11     3029   1989   2709   -238   -180    176       C  
ATOM    850  O   ILE B  11     -24.016   2.822  23.703  1.00 19.71           O  
ANISOU  850  O   ILE B  11     2921   1860   2708   -228   -201    180       O  
ATOM    851  CB  ILE B  11     -23.978   5.260  21.932  1.00 17.17           C  
ANISOU  851  CB  ILE B  11     2482   1677   2363   -186    -88     60       C  
ATOM    852  CG1 ILE B  11     -23.112   6.149  21.028  1.00 17.28           C  
ANISOU  852  CG1 ILE B  11     2430   1725   2411   -156    -84      6       C  
ATOM    853  CG2 ILE B  11     -25.377   5.850  22.086  1.00 17.55           C  
ANISOU  853  CG2 ILE B  11     2558   1771   2337   -215     -5     64       C  
ATOM    854  CD1 ILE B  11     -22.919   7.581  21.557  1.00 13.39           C  
ANISOU  854  CD1 ILE B  11     1967   1271   1849   -160    -75      9       C  
ATOM    855  N   THR B  12     -24.660   4.338  25.210  1.00 18.23           N  
ANISOU  855  N   THR B  12     2857   1734   2335   -286   -158    216       N  
ATOM    856  CA  THR B  12     -25.268   3.328  26.071  1.00 21.25           C  
ANISOU  856  CA  THR B  12     3324   2070   2681   -334   -165    278       C  
ATOM    857  C   THR B  12     -26.797   3.431  26.057  1.00 22.31           C  
ANISOU  857  C   THR B  12     3473   2238   2768   -373    -42    263       C  
ATOM    858  O   THR B  12     -27.498   2.518  26.481  1.00 25.64           O  
ANISOU  858  O   THR B  12     3942   2621   3177   -414    -20    300       O  
ATOM    859  CB  THR B  12     -24.731   3.410  27.511  1.00 26.89           C  
ANISOU  859  CB  THR B  12     4157   2756   3302   -377   -243    345       C  
ATOM    860  OG1 THR B  12     -25.069   4.679  28.085  1.00 25.36           O  
ANISOU  860  OG1 THR B  12     4014   2622   3000   -409   -183    324       O  
ATOM    861  CG2 THR B  12     -23.218   3.246  27.522  1.00 30.53           C  
ANISOU  861  CG2 THR B  12     4590   3175   3836   -335   -380    361       C  
ATOM    862  N   LEU B  13     -27.302   4.563  25.582  1.00 18.63           N  
ANISOU  862  N   LEU B  13     2960   1834   2283   -362     35    209       N  
ATOM    863  CA  LEU B  13     -28.715   4.718  25.295  1.00 20.84           C  
ANISOU  863  CA  LEU B  13     3216   2143   2562   -384    143    181       C  
ATOM    864  C   LEU B  13     -28.793   5.550  24.031  1.00 17.99           C  
ANISOU  864  C   LEU B  13     2751   1831   2254   -335    169    122       C  
ATOM    865  O   LEU B  13     -28.249   6.653  23.982  1.00 15.72           O  
ANISOU  865  O   LEU B  13     2453   1574   1945   -314    161    102       O  
ATOM    866  CB  LEU B  13     -29.429   5.454  26.427  1.00 23.46           C  
ANISOU  866  CB  LEU B  13     3626   2492   2795   -440    218    186       C  
ATOM    867  CG  LEU B  13     -30.888   5.779  26.100  1.00 24.30           C  
ANISOU  867  CG  LEU B  13     3683   2624   2927   -457    336    145       C  
ATOM    868  CD1 LEU B  13     -31.741   4.577  26.397  1.00 28.34           C  
ANISOU  868  CD1 LEU B  13     4223   3097   3450   -505    375    170       C  
ATOM    869  CD2 LEU B  13     -31.382   6.984  26.883  1.00 27.27           C  
ANISOU  869  CD2 LEU B  13     4096   3028   3239   -491    419    117       C  
ATOM    870  N  AARG B  14     -29.467   5.032  23.012  0.56 16.29           N  
ANISOU  870  N  AARG B  14     2465   1620   2104   -323    196     96       N  
ATOM    871  N  BARG B  14     -29.457   5.036  23.005  0.44 16.58           N  
ANISOU  871  N  BARG B  14     2501   1657   2142   -323    196     96       N  
ATOM    872  CA AARG B  14     -29.514   5.719  21.724  0.56 17.80           C  
ANISOU  872  CA AARG B  14     2570   1856   2338   -286    206     49       C  
ATOM    873  CA BARG B  14     -29.488   5.738  21.724  0.44 17.72           C  
ANISOU  873  CA BARG B  14     2559   1845   2327   -285    205     49       C  
ATOM    874  C  AARG B  14     -30.724   6.644  21.585  0.56 17.32           C  
ANISOU  874  C  AARG B  14     2478   1831   2272   -295    279     27       C  
ATOM    875  C  BARG B  14     -30.726   6.619  21.554  0.44 17.27           C  
ANISOU  875  C  BARG B  14     2469   1824   2267   -295    279     26       C  
ATOM    876  O  AARG B  14     -31.739   6.467  22.261  0.56 17.46           O  
ANISOU  876  O  AARG B  14     2518   1837   2281   -332    340     34       O  
ATOM    877  O  BARG B  14     -31.760   6.387  22.182  0.44 17.60           O  
ANISOU  877  O  BARG B  14     2531   1853   2303   -331    338     33       O  
ATOM    878  CB AARG B  14     -29.476   4.705  20.575  0.56 18.81           C  
ANISOU  878  CB AARG B  14     2640   1971   2537   -271    182     26       C  
ATOM    879  CB BARG B  14     -29.358   4.747  20.563  0.44 18.31           C  
ANISOU  879  CB BARG B  14     2576   1907   2472   -268    178     25       C  
ATOM    880  CG AARG B  14     -30.721   3.831  20.455  0.56 21.49           C  
ANISOU  880  CG AARG B  14     2964   2295   2907   -302    225     25       C  
ATOM    881  CG BARG B  14     -30.549   3.817  20.388  0.44 20.97           C  
ANISOU  881  CG BARG B  14     2896   2228   2843   -297    217     23       C  
ATOM    882  CD AARG B  14     -30.531   2.766  19.379  0.56 22.34           C  
ANISOU  882  CD AARG B  14     3022   2383   3081   -293    197     -5       C  
ATOM    883  CD BARG B  14     -30.223   2.705  19.402  0.44 21.45           C  
ANISOU  883  CD BARG B  14     2915   2265   2971   -287    184     -3       C  
ATOM    884  NE AARG B  14     -31.781   2.116  19.000  0.56 25.80           N  
ANISOU  884  NE AARG B  14     3428   2817   3556   -321    236    -19       N  
ATOM    885  NE BARG B  14     -29.252   1.768  19.959  0.44 21.32           N  
ANISOU  885  NE BARG B  14     2934   2186   2979   -283    131     25       N  
ATOM    886  CZ AARG B  14     -32.584   2.548  18.030  0.56 29.40           C  
ANISOU  886  CZ AARG B  14     3824   3317   4030   -321    254    -55       C  
ATOM    887  CZ BARG B  14     -28.579   0.867  19.251  0.44 21.86           C  
ANISOU  887  CZ BARG B  14     2967   2219   3121   -266     96     -3       C  
ATOM    888  NH1AARG B  14     -32.273   3.639  17.342  0.56 29.09           N  
ANISOU  888  NH1AARG B  14     3758   3326   3968   -296    239    -73       N  
ATOM    889  NH1BARG B  14     -27.722   0.058  19.859  0.44 25.89           N  
ANISOU  889  NH1BARG B  14     3505   2660   3672   -258     40     29       N  
ATOM    890  NH2AARG B  14     -33.700   1.895  17.745  0.56 30.60           N  
ANISOU  890  NH2AARG B  14     3942   3460   4224   -350    280    -69       N  
ATOM    891  NH2BARG B  14     -28.752   0.775  17.938  0.44 18.77           N  
ANISOU  891  NH2BARG B  14     2512   1857   2764   -260    115    -64       N  
ATOM    892  N   MET B  15     -30.610   7.635  20.703  1.00 13.96           N  
ANISOU  892  N   MET B  15     1999   1443   1863   -264    275      0       N  
ATOM    893  CA  MET B  15     -31.735   8.503  20.388  1.00 15.77           C  
ANISOU  893  CA  MET B  15     2181   1696   2115   -265    326    -19       C  
ATOM    894  C   MET B  15     -32.814   7.702  19.662  1.00 17.24           C  
ANISOU  894  C   MET B  15     2313   1880   2359   -277    339    -30       C  
ATOM    895  O   MET B  15     -32.520   6.731  18.950  1.00 13.89           O  
ANISOU  895  O   MET B  15     1874   1449   1954   -275    301    -35       O  
ATOM    896  CB  MET B  15     -31.307   9.672  19.495  1.00 13.59           C  
ANISOU  896  CB  MET B  15     1865   1452   1845   -231    302    -33       C  
ATOM    897  CG  MET B  15     -30.457  10.717  20.178  1.00 11.12           C  
ANISOU  897  CG  MET B  15     1592   1143   1489   -221    301    -30       C  
ATOM    898  SD  MET B  15     -30.072  12.083  19.049  1.00 13.29           S  
ANISOU  898  SD  MET B  15     1819   1448   1781   -188    280    -42       S  
ATOM    899  CE  MET B  15     -28.735  11.364  18.097  1.00  6.60           C  
ANISOU  899  CE  MET B  15      968    610    928   -177    220    -50       C  
ATOM    900  N   ARG B  16     -34.062   8.123  19.841  1.00 18.40           N  
ANISOU  900  N   ARG B  16     2423   2027   2542   -291    394    -41       N  
ATOM    901  CA  ARG B  16     -35.183   7.495  19.159  1.00 18.59           C  
ANISOU  901  CA  ARG B  16     2383   2047   2632   -304    402    -56       C  
ATOM    902  C   ARG B  16     -35.736   8.424  18.085  1.00 18.81           C  
ANISOU  902  C   ARG B  16     2335   2103   2710   -279    374    -69       C  
ATOM    903  O   ARG B  16     -36.091   9.565  18.360  1.00 18.30           O  
ANISOU  903  O   ARG B  16     2249   2039   2666   -266    401    -72       O  
ATOM    904  CB  ARG B  16     -36.284   7.146  20.156  1.00 19.19           C  
ANISOU  904  CB  ARG B  16     2463   2093   2735   -346    485    -61       C  
ATOM    905  N   SER B  17     -35.826   7.924  16.864  1.00 18.67           N  
ANISOU  905  N   SER B  17     2279   2103   2713   -277    317    -77       N  
ATOM    906  CA  SER B  17     -36.420   8.692  15.795  1.00 17.70           C  
ANISOU  906  CA  SER B  17     2093   2002   2630   -263    272    -80       C  
ATOM    907  C   SER B  17     -37.887   8.871  16.119  1.00 20.00           C  
ANISOU  907  C   SER B  17     2314   2270   3012   -273    310    -90       C  
ATOM    908  O   SER B  17     -38.516   8.010  16.729  1.00 21.03           O  
ANISOU  908  O   SER B  17     2439   2377   3176   -302    361   -103       O  
ATOM    909  CB  SER B  17     -36.249   7.980  14.453  1.00 17.90           C  
ANISOU  909  CB  SER B  17     2106   2052   2642   -274    205    -91       C  
ATOM    910  OG  SER B  17     -34.878   7.767  14.167  1.00 12.93           O  
ANISOU  910  OG  SER B  17     1532   1437   1945   -268    187    -94       O  
ATOM    911  N   HIS B  18     -38.445   9.996  15.719  1.00 19.58           N  
ANISOU  911  N   HIS B  18     2206   2219   3014   -251    287    -84       N  
ATOM    912  CA  HIS B  18     -39.844  10.224  16.005  1.00 22.49           C  
ANISOU  912  CA  HIS B  18     2490   2558   3499   -257    322   -100       C  
ATOM    913  C   HIS B  18     -40.404  11.338  15.147  1.00 21.01           C  
ANISOU  913  C   HIS B  18     2229   2368   3385   -228    253    -85       C  
ATOM    914  O   HIS B  18     -39.669  11.998  14.399  1.00 19.83           O  
ANISOU  914  O   HIS B  18     2110   2243   3181   -209    184    -56       O  
ATOM    915  CB  HIS B  18     -40.044  10.511  17.496  1.00 24.09           C  
ANISOU  915  CB  HIS B  18     2711   2727   3713   -268    439   -120       C  
ATOM    916  CG  HIS B  18     -39.331  11.736  17.987  1.00 23.43           C  
ANISOU  916  CG  HIS B  18     2667   2644   3590   -242    459   -113       C  
ATOM    917  ND1 HIS B  18     -38.045  11.703  18.482  1.00 25.24           N  
ANISOU  917  ND1 HIS B  18     2993   2890   3705   -242    464   -100       N  
ATOM    918  CD2 HIS B  18     -39.738  13.024  18.083  1.00 23.44           C  
ANISOU  918  CD2 HIS B  18     2618   2624   3664   -217    475   -120       C  
ATOM    919  CE1 HIS B  18     -37.685  12.918  18.850  1.00 24.25           C  
ANISOU  919  CE1 HIS B  18     2880   2759   3575   -221    483   -101       C  
ATOM    920  NE2 HIS B  18     -38.692  13.739  18.618  1.00 23.03           N  
ANISOU  920  NE2 HIS B  18     2638   2580   3531   -205    493   -114       N  
ATOM    921  N   ARG B  19     -41.716  11.510  15.248  1.00 20.72           N  
ANISOU  921  N   ARG B  19     2094   2298   3481   -230    268   -103       N  
ATOM    922  CA  ARG B  19     -42.449  12.495  14.480  1.00 24.32           C  
ANISOU  922  CA  ARG B  19     2463   2736   4043   -202    190    -84       C  
ATOM    923  C   ARG B  19     -42.901  13.589  15.419  1.00 25.74           C  
ANISOU  923  C   ARG B  19     2594   2867   4320   -178    272   -105       C  
ATOM    924  O   ARG B  19     -43.084  13.358  16.614  1.00 28.47           O  
ANISOU  924  O   ARG B  19     2950   3191   4677   -198    397   -147       O  
ATOM    925  CB  ARG B  19     -43.669  11.851  13.818  1.00 29.70           C  
ANISOU  925  CB  ARG B  19     3047   3405   4831   -221    132    -96       C  
ATOM    926  CG  ARG B  19     -43.321  10.732  12.841  1.00 37.80           C  
ANISOU  926  CG  ARG B  19     4118   4477   5767   -253     54    -88       C  
ATOM    927  CD  ARG B  19     -44.572  10.086  12.286  1.00 48.96           C  
ANISOU  927  CD  ARG B  19     5434   5877   7293   -277      0   -107       C  
ATOM    928  NE  ARG B  19     -45.316   9.385  13.328  1.00 57.66           N  
ANISOU  928  NE  ARG B  19     6487   6941   8478   -300    117   -155       N  
ATOM    929  CZ  ARG B  19     -45.111   8.114  13.665  1.00 62.94           C  
ANISOU  929  CZ  ARG B  19     7204   7619   9091   -339    173   -179       C  
ATOM    930  NH1 ARG B  19     -44.187   7.400  13.035  1.00 64.37           N  
ANISOU  930  NH1 ARG B  19     7472   7841   9147   -353    123   -167       N  
ATOM    931  NH2 ARG B  19     -45.835   7.555  14.627  1.00 63.78           N  
ANISOU  931  NH2 ARG B  19     7273   7687   9275   -367    284   -217       N  
ATOM    932  N   VAL B  20     -43.062  14.785  14.875  1.00 21.75           N  
ANISOU  932  N   VAL B  20     2041   2340   3883   -141    204    -77       N  
ATOM    933  CA  VAL B  20     -43.523  15.911  15.651  1.00 21.47           C  
ANISOU  933  CA  VAL B  20     1947   2247   3964   -115    276   -102       C  
ATOM    934  C   VAL B  20     -44.391  16.770  14.743  1.00 22.11           C  
ANISOU  934  C   VAL B  20     1916   2285   4200    -80    165    -71       C  
ATOM    935  O   VAL B  20     -44.038  17.019  13.591  1.00 21.62           O  
ANISOU  935  O   VAL B  20     1878   2246   4089    -69     30     -9       O  
ATOM    936  CB  VAL B  20     -42.335  16.727  16.225  1.00 24.26           C  
ANISOU  936  CB  VAL B  20     2395   2609   4213   -101    324    -95       C  
ATOM    937  CG1 VAL B  20     -41.474  17.272  15.106  1.00 25.16           C  
ANISOU  937  CG1 VAL B  20     2558   2753   4248    -80    202    -31       C  
ATOM    938  CG2 VAL B  20     -42.828  17.871  17.102  1.00 23.91           C  
ANISOU  938  CG2 VAL B  20     2292   2501   4292    -80    415   -136       C  
ATOM    939  N   PRO B  21     -45.554  17.197  15.244  1.00 23.52           N  
ANISOU  939  N   PRO B  21     1969   2395   4571    -66    220   -114       N  
ATOM    940  CA  PRO B  21     -46.396  18.074  14.431  1.00 24.99           C  
ANISOU  940  CA  PRO B  21     2038   2526   4933    -27    102    -81       C  
ATOM    941  C   PRO B  21     -45.740  19.437  14.280  1.00 24.53           C  
ANISOU  941  C   PRO B  21     2013   2442   4868     13     65    -39       C  
ATOM    942  O   PRO B  21     -45.067  19.902  15.193  1.00 22.61           O  
ANISOU  942  O   PRO B  21     1830   2195   4566     16    179    -71       O  
ATOM    943  CB  PRO B  21     -47.679  18.205  15.260  1.00 27.18           C  
ANISOU  943  CB  PRO B  21     2171   2727   5430    -24    208   -158       C  
ATOM    944  CG  PRO B  21     -47.646  17.050  16.215  1.00 25.15           C  
ANISOU  944  CG  PRO B  21     1963   2502   5089    -77    356   -220       C  
ATOM    945  CD  PRO B  21     -46.204  16.809  16.507  1.00 23.69           C  
ANISOU  945  CD  PRO B  21     1949   2384   4667    -94    386   -196       C  
ATOM    946  N  ACYS B  22     -45.939  20.065  13.129  0.60 24.89           N  
ANISOU  946  N  ACYS B  22     2023   2467   4968     40    -99     35       N  
ATOM    947  N  BCYS B  22     -45.939  20.070  13.126  0.40 24.79           N  
ANISOU  947  N  BCYS B  22     2010   2454   4956     40   -100     35       N  
ATOM    948  CA ACYS B  22     -45.400  21.392  12.872  0.60 24.20           C  
ANISOU  948  CA ACYS B  22     1962   2343   4890     76   -148     86       C  
ATOM    949  CA BCYS B  22     -45.410  21.409  12.891  0.40 24.14           C  
ANISOU  949  CA BCYS B  22     1952   2334   4886     76   -146     85       C  
ATOM    950  C  ACYS B  22     -45.771  22.367  13.993  0.60 23.04           C  
ANISOU  950  C  ACYS B  22     1739   2113   4904    109    -19     22       C  
ATOM    951  C  BCYS B  22     -45.765  22.339  14.039  0.40 22.98           C  
ANISOU  951  C  BCYS B  22     1732   2106   4893    107    -12     19       C  
ATOM    952  O  ACYS B  22     -46.933  22.450  14.394  0.60 22.56           O  
ANISOU  952  O  ACYS B  22     1539   1984   5048    123     24    -30       O  
ATOM    953  O  BCYS B  22     -46.908  22.373  14.494  0.40 22.81           O  
ANISOU  953  O  BCYS B  22     1576   2020   5071    119     40    -38       O  
ATOM    954  CB ACYS B  22     -45.925  21.893  11.525  0.60 25.32           C  
ANISOU  954  CB ACYS B  22     2051   2454   5116     94   -351    176       C  
ATOM    955  CB BCYS B  22     -45.952  21.992  11.584  0.40 25.34           C  
ANISOU  955  CB BCYS B  22     2047   2449   5132     98   -346    174       C  
ATOM    956  SG ACYS B  22     -45.435  23.551  11.079  0.60 34.22           S  
ANISOU  956  SG ACYS B  22     3201   3519   6283    136   -434    255       S  
ATOM    957  SG BCYS B  22     -44.972  21.615  10.120  0.40 24.87           S  
ANISOU  957  SG BCYS B  22     2137   2480   4835     58   -505    272       S  
ATOM    958  N   GLY B  23     -44.778  23.094  14.504  1.00 21.20           N  
ANISOU  958  N   GLY B  23     1592   1882   4580    116     50     18       N  
ATOM    959  CA  GLY B  23     -45.018  24.107  15.513  1.00 22.84           C  
ANISOU  959  CA  GLY B  23     1742   2010   4925    141    171    -46       C  
ATOM    960  C   GLY B  23     -44.672  23.663  16.918  1.00 23.94           C  
ANISOU  960  C   GLY B  23     1940   2178   4978    104    365   -142       C  
ATOM    961  O   GLY B  23     -44.378  24.497  17.776  1.00 24.64           O  
ANISOU  961  O   GLY B  23     2043   2228   5092    110    472   -192       O  
ATOM    962  N   GLN B  24     -44.706  22.356  17.157  1.00 22.52           N  
ANISOU  962  N   GLN B  24     1800   2062   4694     61    407   -165       N  
ATOM    963  CA  GLN B  24     -44.370  21.813  18.469  1.00 22.27           C  
ANISOU  963  CA  GLN B  24     1842   2060   4560     15    577   -241       C  
ATOM    964  C   GLN B  24     -42.859  21.795  18.683  1.00 19.77           C  
ANISOU  964  C   GLN B  24     1683   1808   4021     -1    580   -214       C  
ATOM    965  O   GLN B  24     -42.080  21.790  17.718  1.00 17.12           O  
ANISOU  965  O   GLN B  24     1405   1514   3586     12    457   -139       O  
ATOM    966  CB  GLN B  24     -44.928  20.398  18.626  1.00 23.17           C  
ANISOU  966  CB  GLN B  24     1947   2211   4647    -29    612   -265       C  
ATOM    967  CG  GLN B  24     -46.457  20.318  18.581  1.00 24.22           C  
ANISOU  967  CG  GLN B  24     1914   2277   5011    -22    633   -309       C  
ATOM    968  CD  GLN B  24     -47.100  21.152  19.657  1.00 26.02           C  
ANISOU  968  CD  GLN B  24     2065   2425   5397    -22    791   -403       C  
ATOM    969  OE1 GLN B  24     -46.751  21.039  20.827  1.00 28.11           O  
ANISOU  969  OE1 GLN B  24     2409   2703   5569    -67    947   -466       O  
ATOM    970  NE2 GLN B  24     -48.030  22.019  19.265  1.00 26.10           N  
ANISOU  970  NE2 GLN B  24     1920   2348   5650     25    748   -413       N  
ATOM    971  N   ASN B  25     -42.446  21.798  19.947  1.00 18.11           N  
ANISOU  971  N   ASN B  25     1543   1604   3733    -36    720   -278       N  
ATOM    972  CA  ASN B  25     -41.035  21.643  20.275  1.00 19.22           C  
ANISOU  972  CA  ASN B  25     1828   1805   3670    -57    722   -259       C  
ATOM    973  C   ASN B  25     -40.756  20.164  20.343  1.00 20.50           C  
ANISOU  973  C   ASN B  25     2060   2032   3697    -97    717   -245       C  
ATOM    974  O   ASN B  25     -41.673  19.374  20.526  1.00 20.93           O  
ANISOU  974  O   ASN B  25     2064   2079   3810   -120    760   -271       O  
ATOM    975  CB  ASN B  25     -40.704  22.287  21.624  1.00 21.20           C  
ANISOU  975  CB  ASN B  25     2132   2034   3890    -84    860   -331       C  
ATOM    976  CG  ASN B  25     -41.028  23.771  21.664  1.00 23.15           C  
ANISOU  976  CG  ASN B  25     2303   2203   4289    -46    884   -360       C  
ATOM    977  OD1 ASN B  25     -41.029  24.455  20.633  1.00 16.83           O  
ANISOU  977  OD1 ASN B  25     1449   1375   3569      4    771   -301       O  
ATOM    978  ND2 ASN B  25     -41.297  24.279  22.866  1.00 22.95           N  
ANISOU  978  ND2 ASN B  25     2281   2138   4302    -76   1034   -452       N  
ATOM    979  N   THR B  26     -39.501  19.774  20.186  1.00 22.16           N  
ANISOU  979  N   THR B  26     2378   2299   3741   -105    666   -205       N  
ATOM    980  CA  THR B  26     -39.155  18.367  20.333  1.00 19.37           C  
ANISOU  980  CA  THR B  26     2092   1996   3270   -141    663   -194       C  
ATOM    981  C   THR B  26     -37.783  18.190  20.967  1.00 18.64           C  
ANISOU  981  C   THR B  26     2126   1941   3015   -162    674   -188       C  
ATOM    982  O   THR B  26     -36.963  19.115  20.991  1.00 18.68           O  
ANISOU  982  O   THR B  26     2164   1945   2987   -144    656   -182       O  
ATOM    983  CB  THR B  26     -39.207  17.597  19.001  1.00 18.52           C  
ANISOU  983  CB  THR B  26     1959   1921   3157   -128    543   -141       C  
ATOM    984  OG1 THR B  26     -39.325  16.196  19.282  1.00 19.37           O  
ANISOU  984  OG1 THR B  26     2098   2053   3207   -165    568   -149       O  
ATOM    985  CG2 THR B  26     -37.933  17.843  18.166  1.00 16.41           C  
ANISOU  985  CG2 THR B  26     1755   1692   2786   -109    448    -91       C  
ATOM    986  N   ARG B  27     -37.548  16.995  21.494  1.00 16.07           N  
ANISOU  986  N   ARG B  27     1866   1642   2599   -201    697   -188       N  
ATOM    987  CA  ARG B  27     -36.312  16.719  22.205  1.00 18.20           C  
ANISOU  987  CA  ARG B  27     2250   1938   2728   -224    698   -180       C  
ATOM    988  C   ARG B  27     -35.776  15.348  21.816  1.00 18.15           C  
ANISOU  988  C   ARG B  27     2286   1964   2647   -235    633   -143       C  
ATOM    989  O   ARG B  27     -36.547  14.421  21.555  1.00 17.20           O  
ANISOU  989  O   ARG B  27     2131   1841   2564   -249    638   -140       O  
ATOM    990  CB  ARG B  27     -36.539  16.792  23.720  1.00 20.91           C  
ANISOU  990  CB  ARG B  27     2655   2263   3029   -277    815   -228       C  
ATOM    991  N   PHE B  28     -34.452  15.248  21.759  1.00 16.09           N  
ANISOU  991  N   PHE B  28     2092   1728   2295   -228    575   -119       N  
ATOM    992  CA  PHE B  28     -33.761  13.980  21.591  1.00 17.55           C  
ANISOU  992  CA  PHE B  28     2322   1931   2415   -238    521    -91       C  
ATOM    993  C   PHE B  28     -32.886  13.782  22.822  1.00 18.56           C  
ANISOU  993  C   PHE B  28     2550   2055   2445   -270    536    -89       C  
ATOM    994  O   PHE B  28     -32.402  14.760  23.418  1.00 18.38           O  
ANISOU  994  O   PHE B  28     2561   2030   2391   -272    555   -105       O  
ATOM    995  CB  PHE B  28     -32.874  14.004  20.343  1.00 14.77           C  
ANISOU  995  CB  PHE B  28     1952   1604   2056   -204    431    -68       C  
ATOM    996  CG  PHE B  28     -33.624  13.889  19.045  1.00 16.65           C  
ANISOU  996  CG  PHE B  28     2114   1851   2361   -187    393    -61       C  
ATOM    997  CD1 PHE B  28     -34.029  12.644  18.566  1.00 17.17           C  
ANISOU  997  CD1 PHE B  28     2163   1922   2437   -201    373    -57       C  
ATOM    998  CD2 PHE B  28     -33.903  15.016  18.289  1.00 17.06           C  
ANISOU  998  CD2 PHE B  28     2116   1903   2464   -161    370    -54       C  
ATOM    999  CE1 PHE B  28     -34.712  12.530  17.374  1.00 16.76           C  
ANISOU  999  CE1 PHE B  28     2048   1881   2437   -193    328    -52       C  
ATOM   1000  CE2 PHE B  28     -34.584  14.911  17.090  1.00 19.06           C  
ANISOU 1000  CE2 PHE B  28     2310   2164   2769   -152    317    -39       C  
ATOM   1001  CZ  PHE B  28     -34.989  13.664  16.629  1.00 16.93           C  
ANISOU 1001  CZ  PHE B  28     2026   1906   2500   -170    295    -40       C  
ATOM   1002  N   ILE B  29     -32.673  12.529  23.207  1.00 14.00           N  
ANISOU 1002  N   ILE B  29     2024   1474   1823   -297    520    -67       N  
ATOM   1003  CA  ILE B  29     -31.762  12.253  24.306  1.00 13.94           C  
ANISOU 1003  CA  ILE B  29     2117   1458   1721   -327    504    -51       C  
ATOM   1004  C   ILE B  29     -30.929  11.012  24.051  1.00 12.73           C  
ANISOU 1004  C   ILE B  29     1989   1299   1547   -322    421    -13       C  
ATOM   1005  O   ILE B  29     -31.406  10.030  23.474  1.00 13.09           O  
ANISOU 1005  O   ILE B  29     2002   1338   1636   -321    414     -4       O  
ATOM   1006  CB  ILE B  29     -32.514  12.095  25.643  1.00 20.80           C  
ANISOU 1006  CB  ILE B  29     3055   2308   2540   -392    594    -62       C  
ATOM   1007  CG1 ILE B  29     -31.524  11.950  26.802  1.00 23.61           C  
ANISOU 1007  CG1 ILE B  29     3531   2659   2782   -432    561    -39       C  
ATOM   1008  CG2 ILE B  29     -33.431  10.894  25.597  1.00 22.89           C  
ANISOU 1008  CG2 ILE B  29     3308   2555   2833   -420    627    -49       C  
ATOM   1009  CD1 ILE B  29     -32.196  11.866  28.162  1.00 27.78           C  
ANISOU 1009  CD1 ILE B  29     4151   3172   3234   -512    656    -51       C  
ATOM   1010  N   LEU B  30     -29.671  11.066  24.475  1.00  8.79           N  
ANISOU 1010  N   LEU B  30     1544    797    997   -319    357      4       N  
ATOM   1011  CA  LEU B  30     -28.842   9.869  24.470  1.00 12.45           C  
ANISOU 1011  CA  LEU B  30     2036   1240   1456   -316    277     39       C  
ATOM   1012  C   LEU B  30     -27.935   9.845  25.691  1.00 12.08           C  
ANISOU 1012  C   LEU B  30     2086   1175   1331   -346    228     67       C  
ATOM   1013  O   LEU B  30     -27.845  10.825  26.450  1.00 13.11           O  
ANISOU 1013  O   LEU B  30     2261   1317   1402   -368    254     52       O  
ATOM   1014  CB  LEU B  30     -28.036   9.745  23.166  1.00 10.68           C  
ANISOU 1014  CB  LEU B  30     1737   1026   1295   -265    217     28       C  
ATOM   1015  CG  LEU B  30     -26.951  10.770  22.808  1.00 11.02           C  
ANISOU 1015  CG  LEU B  30     1758   1087   1341   -235    181      9       C  
ATOM   1016  CD1 LEU B  30     -25.942  10.135  21.848  1.00 11.60           C  
ANISOU 1016  CD1 LEU B  30     1785   1154   1471   -204    119      1       C  
ATOM   1017  CD2 LEU B  30     -27.540  12.065  22.203  1.00 10.52           C  
ANISOU 1017  CD2 LEU B  30     1647   1053   1294   -220    234    -20       C  
ATOM   1018  N   ASN B  31     -27.269   8.722  25.892  1.00 13.76           N  
ANISOU 1018  N   ASN B  31     2329   1353   1545   -349    149    108       N  
ATOM   1019  CA  ASN B  31     -26.319   8.616  26.984  1.00 16.47           C  
ANISOU 1019  CA  ASN B  31     2763   1673   1823   -375     71    145       C  
ATOM   1020  C   ASN B  31     -25.006   8.093  26.440  1.00 17.50           C  
ANISOU 1020  C   ASN B  31     2847   1777   2026   -329    -40    157       C  
ATOM   1021  O   ASN B  31     -24.987   7.131  25.670  1.00 16.01           O  
ANISOU 1021  O   ASN B  31     2604   1565   1916   -302    -59    161       O  
ATOM   1022  CB  ASN B  31     -26.843   7.685  28.072  1.00 16.78           C  
ANISOU 1022  CB  ASN B  31     2907   1677   1791   -440     77    197       C  
ATOM   1023  CG  ASN B  31     -26.066   7.811  29.383  1.00 21.14           C  
ANISOU 1023  CG  ASN B  31     3579   2213   2241   -488      2    239       C  
ATOM   1024  OD1 ASN B  31     -25.681   8.901  29.795  1.00 21.37           O  
ANISOU 1024  OD1 ASN B  31     3631   2269   2218   -497      4    211       O  
ATOM   1025  ND2 ASN B  31     -25.854   6.691  30.044  1.00 26.83           N  
ANISOU 1025  ND2 ASN B  31     4378   2884   2932   -523    -69    308       N  
ATOM   1026  N   VAL B  32     -23.910   8.732  26.836  1.00 14.49           N  
ANISOU 1026  N   VAL B  32     2481   1397   1627   -321   -109    156       N  
ATOM   1027  CA  VAL B  32     -22.589   8.313  26.391  1.00 17.27           C  
ANISOU 1027  CA  VAL B  32     2778   1718   2066   -278   -213    159       C  
ATOM   1028  C   VAL B  32     -21.707   8.080  27.609  1.00 21.09           C  
ANISOU 1028  C   VAL B  32     3345   2163   2504   -306   -329    210       C  
ATOM   1029  O   VAL B  32     -21.685   8.896  28.534  1.00 20.82           O  
ANISOU 1029  O   VAL B  32     3389   2151   2372   -347   -330    213       O  
ATOM   1030  CB  VAL B  32     -21.947   9.371  25.431  1.00 17.50           C  
ANISOU 1030  CB  VAL B  32     2717   1782   2151   -235   -194     98       C  
ATOM   1031  CG1 VAL B  32     -21.706  10.685  26.159  1.00 22.56           C  
ANISOU 1031  CG1 VAL B  32     3403   2451   2718   -257   -187     84       C  
ATOM   1032  CG2 VAL B  32     -20.639   8.852  24.837  1.00 14.68           C  
ANISOU 1032  CG2 VAL B  32     2285   1388   1905   -194   -278     86       C  
ATOM   1033  N   GLN B  33     -21.015   6.947  27.636  1.00 17.67           N  
ANISOU 1033  N   GLN B  33     2900   1668   2145   -289   -431    250       N  
ATOM   1034  CA  GLN B  33     -20.008   6.708  28.667  1.00 17.40           C  
ANISOU 1034  CA  GLN B  33     2928   1588   2094   -308   -573    304       C  
ATOM   1035  C   GLN B  33     -18.639   6.953  28.063  1.00 18.25           C  
ANISOU 1035  C   GLN B  33     2928   1677   2329   -251   -652    266       C  
ATOM   1036  O   GLN B  33     -18.334   6.443  26.992  1.00 20.91           O  
ANISOU 1036  O   GLN B  33     3158   1993   2796   -201   -638    230       O  
ATOM   1037  CB  GLN B  33     -20.081   5.269  29.192  1.00 18.20           C  
ANISOU 1037  CB  GLN B  33     3088   1616   2212   -327   -654    384       C  
ATOM   1038  N   SER B  34     -17.811   7.724  28.753  1.00 18.89           N  
ANISOU 1038  N   SER B  34     3038   1763   2375   -265   -729    268       N  
ATOM   1039  CA  SER B  34     -16.481   8.028  28.249  1.00 22.75           C  
ANISOU 1039  CA  SER B  34     3420   2232   2994   -218   -801    226       C  
ATOM   1040  C   SER B  34     -15.580   8.563  29.348  1.00 20.57           C  
ANISOU 1040  C   SER B  34     3201   1943   2673   -247   -929    252       C  
ATOM   1041  O   SER B  34     -16.017   9.306  30.224  1.00 21.32           O  
ANISOU 1041  O   SER B  34     3403   2078   2618   -303   -910    265       O  
ATOM   1042  CB  SER B  34     -16.550   9.046  27.102  1.00 26.75           C  
ANISOU 1042  CB  SER B  34     3832   2796   3534   -188   -678    139       C  
ATOM   1043  OG  SER B  34     -17.114  10.259  27.537  1.00 33.06           O  
ANISOU 1043  OG  SER B  34     4697   3656   4209   -224   -607    123       O  
ATOM   1044  N   LYS B  35     -14.313   8.185  29.279  1.00 20.55           N  
ANISOU 1044  N   LYS B  35     3119   1880   2810   -211  -1059    254       N  
ATOM   1045  CA  LYS B  35     -13.310   8.675  30.206  1.00 20.49           C  
ANISOU 1045  CA  LYS B  35     3142   1855   2790   -233  -1202    273       C  
ATOM   1046  C   LYS B  35     -12.012   8.826  29.432  1.00 19.51           C  
ANISOU 1046  C   LYS B  35     2856   1695   2862   -174  -1250    211       C  
ATOM   1047  O   LYS B  35     -11.483   7.847  28.911  1.00 21.67           O  
ANISOU 1047  O   LYS B  35     3034   1899   3300   -127  -1301    212       O  
ATOM   1048  CB  LYS B  35     -13.126   7.697  31.375  1.00 22.06           C  
ANISOU 1048  CB  LYS B  35     3446   1986   2949   -269  -1371    380       C  
ATOM   1049  CG  LYS B  35     -12.129   8.174  32.428  1.00 27.16           C  
ANISOU 1049  CG  LYS B  35     4142   2614   3564   -303  -1543    410       C  
ATOM   1050  CD  LYS B  35     -12.040   7.194  33.594  1.00 32.38           C  
ANISOU 1050  CD  LYS B  35     4930   3208   4165   -349  -1718    530       C  
ATOM   1051  CE  LYS B  35     -11.072   7.684  34.664  1.00 38.11           C  
ANISOU 1051  CE  LYS B  35     5717   3919   4846   -393  -1905    563       C  
ATOM   1052  NZ  LYS B  35     -11.498   9.010  35.220  1.00 37.78           N  
ANISOU 1052  NZ  LYS B  35     5777   3968   4608   -462  -1818    518       N  
ATOM   1053  N   PRO B  36     -11.497  10.058  29.328  1.00 18.17           N  
ANISOU 1053  N   PRO B  36     2650   1568   2687   -179  -1223    149       N  
ATOM   1054  CA  PRO B  36     -12.055  11.318  29.833  1.00 16.18           C  
ANISOU 1054  CA  PRO B  36     2491   1391   2267   -230  -1149    130       C  
ATOM   1055  C   PRO B  36     -13.414  11.652  29.222  1.00 16.59           C  
ANISOU 1055  C   PRO B  36     2573   1505   2227   -236   -962    106       C  
ATOM   1056  O   PRO B  36     -13.775  11.131  28.158  1.00 13.29           O  
ANISOU 1056  O   PRO B  36     2079   1085   1886   -195   -877     84       O  
ATOM   1057  CB  PRO B  36     -11.030  12.363  29.367  1.00 14.45           C  
ANISOU 1057  CB  PRO B  36     2166   1182   2143   -210  -1146     52       C  
ATOM   1058  CG  PRO B  36      -9.751  11.608  29.240  1.00 19.77           C  
ANISOU 1058  CG  PRO B  36     2729   1777   3008   -169  -1287     54       C  
ATOM   1059  CD  PRO B  36     -10.148  10.236  28.765  1.00 18.72           C  
ANISOU 1059  CD  PRO B  36     2569   1598   2946   -135  -1280     90       C  
ATOM   1060  N   THR B  37     -14.160  12.530  29.881  1.00 16.93           N  
ANISOU 1060  N   THR B  37     2720   1600   2112   -288   -898    103       N  
ATOM   1061  CA  THR B  37     -15.448  12.947  29.346  1.00 20.66           C  
ANISOU 1061  CA  THR B  37     3210   2125   2515   -291   -728     77       C  
ATOM   1062  C   THR B  37     -15.244  13.519  27.940  1.00 18.75           C  
ANISOU 1062  C   THR B  37     2838   1904   2382   -240   -633      9       C  
ATOM   1063  O   THR B  37     -14.270  14.228  27.669  1.00 19.08           O  
ANISOU 1063  O   THR B  37     2812   1942   2493   -226   -659    -34       O  
ATOM   1064  CB  THR B  37     -16.157  13.958  30.261  1.00 25.78           C  
ANISOU 1064  CB  THR B  37     3972   2818   3006   -354   -667     67       C  
ATOM   1065  OG1 THR B  37     -15.395  15.168  30.315  1.00 29.26           O  
ANISOU 1065  OG1 THR B  37     4382   3275   3462   -358   -678     13       O  
ATOM   1066  CG2 THR B  37     -16.283  13.401  31.666  1.00 24.91           C  
ANISOU 1066  CG2 THR B  37     4006   2689   2769   -421   -759    132       C  
ATOM   1067  N   ALA B  38     -16.175  13.190  27.056  1.00 16.78           N  
ANISOU 1067  N   ALA B  38     2561   1674   2143   -219   -526      3       N  
ATOM   1068  CA  ALA B  38     -16.057  13.468  25.636  1.00 17.05           C  
ANISOU 1068  CA  ALA B  38     2487   1723   2269   -179   -444    -49       C  
ATOM   1069  C   ALA B  38     -16.418  14.892  25.260  1.00 15.47           C  
ANISOU 1069  C   ALA B  38     2282   1570   2028   -187   -345    -91       C  
ATOM   1070  O   ALA B  38     -17.271  15.519  25.900  1.00 14.11           O  
ANISOU 1070  O   ALA B  38     2185   1423   1755   -218   -297    -83       O  
ATOM   1071  CB  ALA B  38     -16.950  12.503  24.862  1.00 15.34           C  
ANISOU 1071  CB  ALA B  38     2252   1507   2071   -161   -383    -36       C  
ATOM   1072  N   GLU B  39     -15.773  15.394  24.209  1.00 11.73           N  
ANISOU 1072  N   GLU B  39     1719   1101   1638   -163   -310   -137       N  
ATOM   1073  CA  GLU B  39     -16.290  16.537  23.469  1.00 16.05           C  
ANISOU 1073  CA  GLU B  39     2251   1685   2163   -164   -205   -166       C  
ATOM   1074  C   GLU B  39     -17.506  16.090  22.656  1.00 13.29           C  
ANISOU 1074  C   GLU B  39     1900   1357   1793   -154   -126   -151       C  
ATOM   1075  O   GLU B  39     -17.521  14.994  22.106  1.00 15.26           O  
ANISOU 1075  O   GLU B  39     2117   1594   2086   -138   -137   -145       O  
ATOM   1076  CB  GLU B  39     -15.229  17.113  22.517  1.00 15.75           C  
ANISOU 1076  CB  GLU B  39     2126   1643   2216   -152   -187   -215       C  
ATOM   1077  CG  GLU B  39     -13.941  17.523  23.194  1.00 22.43           C  
ANISOU 1077  CG  GLU B  39     2951   2463   3110   -160   -268   -239       C  
ATOM   1078  CD  GLU B  39     -12.918  18.087  22.210  1.00 27.69           C  
ANISOU 1078  CD  GLU B  39     3524   3121   3875   -155   -232   -293       C  
ATOM   1079  OE1 GLU B  39     -13.136  17.964  20.990  1.00 29.25           O  
ANISOU 1079  OE1 GLU B  39     3682   3333   4100   -147   -151   -310       O  
ATOM   1080  OE2 GLU B  39     -11.896  18.649  22.653  1.00 28.94           O  
ANISOU 1080  OE2 GLU B  39     3654   3261   4082   -165   -282   -322       O  
ATOM   1081  N   VAL B  40     -18.512  16.951  22.553  1.00 11.49           N  
ANISOU 1081  N   VAL B  40     1700   1156   1510   -163    -51   -150       N  
ATOM   1082  CA  VAL B  40     -19.731  16.598  21.840  1.00 13.02           C  
ANISOU 1082  CA  VAL B  40     1889   1368   1689   -155     11   -134       C  
ATOM   1083  C   VAL B  40     -20.043  17.635  20.778  1.00 14.31           C  
ANISOU 1083  C   VAL B  40     2017   1552   1867   -149     77   -149       C  
ATOM   1084  O   VAL B  40     -20.019  18.829  21.048  1.00 13.17           O  
ANISOU 1084  O   VAL B  40     1885   1409   1710   -157    100   -160       O  
ATOM   1085  CB  VAL B  40     -20.940  16.503  22.797  1.00 17.21           C  
ANISOU 1085  CB  VAL B  40     2487   1902   2149   -175     37   -109       C  
ATOM   1086  CG1 VAL B  40     -22.219  16.301  22.011  1.00 16.93           C  
ANISOU 1086  CG1 VAL B  40     2431   1884   2120   -167    100    -99       C  
ATOM   1087  CG2 VAL B  40     -20.726  15.376  23.815  1.00 18.35           C  
ANISOU 1087  CG2 VAL B  40     2683   2024   2265   -192    -30    -80       C  
ATOM   1088  N   LYS B  41     -20.318  17.168  19.566  1.00 10.70           N  
ANISOU 1088  N   LYS B  41     1522   1108   1436   -140    101   -149       N  
ATOM   1089  CA  LYS B  41     -20.763  18.044  18.483  1.00 11.84           C  
ANISOU 1089  CA  LYS B  41     1647   1271   1582   -141    151   -148       C  
ATOM   1090  C   LYS B  41     -22.052  17.505  17.898  1.00 11.05           C  
ANISOU 1090  C   LYS B  41     1545   1186   1467   -138    172   -124       C  
ATOM   1091  O   LYS B  41     -22.200  16.295  17.749  1.00 11.07           O  
ANISOU 1091  O   LYS B  41     1542   1189   1476   -137    157   -124       O  
ATOM   1092  CB  LYS B  41     -19.703  18.109  17.386  1.00 14.43           C  
ANISOU 1092  CB  LYS B  41     1934   1602   1946   -148    159   -176       C  
ATOM   1093  CG  LYS B  41     -18.531  19.026  17.727  1.00 19.15           C  
ANISOU 1093  CG  LYS B  41     2521   2185   2571   -155    152   -202       C  
ATOM   1094  CD  LYS B  41     -17.482  18.993  16.627  1.00 25.92           C  
ANISOU 1094  CD  LYS B  41     3333   3043   3473   -169    176   -238       C  
ATOM   1095  CE  LYS B  41     -16.357  19.971  16.923  1.00 32.37           C  
ANISOU 1095  CE  LYS B  41     4130   3841   4326   -180    176   -267       C  
ATOM   1096  NZ  LYS B  41     -16.838  21.382  16.854  1.00 38.98           N  
ANISOU 1096  NZ  LYS B  41     4997   4681   5131   -191    210   -245       N  
ATOM   1097  N   TRP B  42     -22.972  18.402  17.560  1.00 11.34           N  
ANISOU 1097  N   TRP B  42     1584   1229   1497   -137    203   -106       N  
ATOM   1098  CA  TRP B  42     -24.248  18.004  16.987  1.00 14.23           C  
ANISOU 1098  CA  TRP B  42     1939   1606   1863   -135    213    -83       C  
ATOM   1099  C   TRP B  42     -24.328  18.434  15.535  1.00 14.65           C  
ANISOU 1099  C   TRP B  42     1975   1675   1916   -144    213    -71       C  
ATOM   1100  O   TRP B  42     -23.718  19.444  15.162  1.00 11.31           O  
ANISOU 1100  O   TRP B  42     1554   1248   1495   -151    222    -70       O  
ATOM   1101  CB  TRP B  42     -25.394  18.647  17.768  1.00 13.13           C  
ANISOU 1101  CB  TRP B  42     1806   1451   1730   -129    240    -71       C  
ATOM   1102  CG  TRP B  42     -25.643  18.002  19.090  1.00 12.99           C  
ANISOU 1102  CG  TRP B  42     1820   1424   1693   -136    249    -79       C  
ATOM   1103  CD1 TRP B  42     -25.073  18.330  20.282  1.00 12.58           C  
ANISOU 1103  CD1 TRP B  42     1808   1358   1614   -146    250    -95       C  
ATOM   1104  CD2 TRP B  42     -26.526  16.911  19.348  1.00 10.96           C  
ANISOU 1104  CD2 TRP B  42     1565   1166   1432   -142    255    -70       C  
ATOM   1105  NE1 TRP B  42     -25.563  17.520  21.276  1.00 11.38           N  
ANISOU 1105  NE1 TRP B  42     1694   1200   1432   -163    258    -91       N  
ATOM   1106  CE2 TRP B  42     -26.451  16.635  20.728  1.00 12.95           C  
ANISOU 1106  CE2 TRP B  42     1867   1403   1648   -160    266    -76       C  
ATOM   1107  CE3 TRP B  42     -27.376  16.138  18.548  1.00 13.06           C  
ANISOU 1107  CE3 TRP B  42     1800   1441   1719   -141    252    -58       C  
ATOM   1108  CZ2 TRP B  42     -27.198  15.617  21.327  1.00 11.80           C  
ANISOU 1108  CZ2 TRP B  42     1744   1251   1487   -178    281    -67       C  
ATOM   1109  CZ3 TRP B  42     -28.116  15.131  19.140  1.00 10.12           C  
ANISOU 1109  CZ3 TRP B  42     1439   1061   1344   -154    267    -55       C  
ATOM   1110  CH2 TRP B  42     -28.028  14.885  20.519  1.00 12.00           C  
ANISOU 1110  CH2 TRP B  42     1730   1283   1547   -173    285    -57       C  
ATOM   1111  N   TYR B  43     -25.085  17.667  14.739  1.00 12.38           N  
ANISOU 1111  N   TYR B  43     1676   1405   1623   -151    203    -60       N  
ATOM   1112  CA  TYR B  43     -25.253  17.893  13.298  1.00 13.48           C  
ANISOU 1112  CA  TYR B  43     1814   1564   1743   -172    193    -44       C  
ATOM   1113  C   TYR B  43     -26.698  17.683  12.888  1.00 15.41           C  
ANISOU 1113  C   TYR B  43     2044   1815   1998   -171    170    -14       C  
ATOM   1114  O   TYR B  43     -27.379  16.816  13.440  1.00 13.99           O  
ANISOU 1114  O   TYR B  43     1850   1631   1835   -162    170    -21       O  
ATOM   1115  CB  TYR B  43     -24.396  16.904  12.494  1.00 14.54           C  
ANISOU 1115  CB  TYR B  43     1950   1719   1857   -198    197    -81       C  
ATOM   1116  CG  TYR B  43     -22.931  17.051  12.772  1.00 15.59           C  
ANISOU 1116  CG  TYR B  43     2079   1840   2002   -200    218   -117       C  
ATOM   1117  CD1 TYR B  43     -22.116  17.798  11.928  1.00 14.28           C  
ANISOU 1117  CD1 TYR B  43     1923   1683   1821   -228    241   -127       C  
ATOM   1118  CD2 TYR B  43     -22.368  16.489  13.907  1.00 10.22           C  
ANISOU 1118  CD2 TYR B  43     1389   1139   1355   -178    209   -139       C  
ATOM   1119  CE1 TYR B  43     -20.767  17.966  12.210  1.00 22.57           C  
ANISOU 1119  CE1 TYR B  43     2957   2718   2900   -232    263   -167       C  
ATOM   1120  CE2 TYR B  43     -21.023  16.641  14.187  1.00 13.34           C  
ANISOU 1120  CE2 TYR B  43     1771   1520   1779   -179    213   -173       C  
ATOM   1121  CZ  TYR B  43     -20.226  17.378  13.338  1.00 20.41           C  
ANISOU 1121  CZ  TYR B  43     2661   2422   2672   -204    243   -191       C  
ATOM   1122  OH  TYR B  43     -18.882  17.527  13.620  1.00 19.95           O  
ANISOU 1122  OH  TYR B  43     2577   2345   2660   -206    250   -232       O  
ATOM   1123  N   HIS B  44     -27.156  18.470  11.918  1.00 14.83           N  
ANISOU 1123  N   HIS B  44     1973   1744   1916   -184    144     23       N  
ATOM   1124  CA  HIS B  44     -28.476  18.286  11.309  1.00 16.28           C  
ANISOU 1124  CA  HIS B  44     2138   1933   2116   -187    102     55       C  
ATOM   1125  C   HIS B  44     -28.223  18.083   9.831  1.00 15.88           C  
ANISOU 1125  C   HIS B  44     2119   1915   2001   -233     71     65       C  
ATOM   1126  O   HIS B  44     -27.658  18.956   9.182  1.00 14.06           O  
ANISOU 1126  O   HIS B  44     1922   1685   1737   -255     67     87       O  
ATOM   1127  CB  HIS B  44     -29.359  19.526  11.523  1.00 15.23           C  
ANISOU 1127  CB  HIS B  44     1980   1763   2042   -163     83     98       C  
ATOM   1128  CG  HIS B  44     -30.688  19.455  10.823  1.00 16.46           C  
ANISOU 1128  CG  HIS B  44     2104   1916   2234   -165     22    135       C  
ATOM   1129  ND1 HIS B  44     -31.334  20.575  10.327  1.00 14.80           N  
ANISOU 1129  ND1 HIS B  44     1878   1674   2071   -157    -29    190       N  
ATOM   1130  CD2 HIS B  44     -31.494  18.405  10.532  1.00 15.50           C  
ANISOU 1130  CD2 HIS B  44     1958   1811   2118   -176     -4    127       C  
ATOM   1131  CE1 HIS B  44     -32.477  20.214   9.772  1.00 15.23           C  
ANISOU 1131  CE1 HIS B  44     1898   1729   2161   -161    -91    215       C  
ATOM   1132  NE2 HIS B  44     -32.601  18.903   9.884  1.00 16.88           N  
ANISOU 1132  NE2 HIS B  44     2101   1969   2343   -174    -74    174       N  
ATOM   1133  N   ASN B  45     -28.597  16.917   9.307  1.00 18.51           N  
ANISOU 1133  N   ASN B  45     2449   2272   2311   -255     55     44       N  
ATOM   1134  CA  ASN B  45     -28.355  16.611   7.903  1.00 17.49           C  
ANISOU 1134  CA  ASN B  45     2362   2178   2107   -311     33     41       C  
ATOM   1135  C   ASN B  45     -26.897  16.897   7.510  1.00 20.12           C  
ANISOU 1135  C   ASN B  45     2734   2522   2388   -341     84     11       C  
ATOM   1136  O   ASN B  45     -26.631  17.474   6.453  1.00 16.40           O  
ANISOU 1136  O   ASN B  45     2312   2067   1853   -389     74     33       O  
ATOM   1137  CB  ASN B  45     -29.325  17.390   6.996  1.00 19.03           C  
ANISOU 1137  CB  ASN B  45     2570   2374   2287   -331    -44    108       C  
ATOM   1138  CG  ASN B  45     -30.773  16.934   7.160  1.00 21.18           C  
ANISOU 1138  CG  ASN B  45     2790   2637   2619   -311    -99    126       C  
ATOM   1139  OD1 ASN B  45     -31.029  15.821   7.614  1.00 16.72           O  
ANISOU 1139  OD1 ASN B  45     2197   2078   2078   -302    -76     83       O  
ATOM   1140  ND2 ASN B  45     -31.724  17.798   6.795  1.00 22.46           N  
ANISOU 1140  ND2 ASN B  45     2936   2778   2818   -304   -174    191       N  
ATOM   1141  N   GLY B  46     -25.958  16.500   8.365  1.00 18.11           N  
ANISOU 1141  N   GLY B  46     2460   2255   2167   -318    137    -38       N  
ATOM   1142  CA  GLY B  46     -24.549  16.621   8.031  1.00 19.13           C  
ANISOU 1142  CA  GLY B  46     2608   2388   2272   -345    190    -80       C  
ATOM   1143  C   GLY B  46     -23.928  17.984   8.313  1.00 16.91           C  
ANISOU 1143  C   GLY B  46     2338   2088   2000   -338    206    -54       C  
ATOM   1144  O   GLY B  46     -22.728  18.174   8.124  1.00 17.69           O  
ANISOU 1144  O   GLY B  46     2443   2186   2093   -361    255    -92       O  
ATOM   1145  N   VAL B  47     -24.731  18.935   8.768  1.00 10.75           N  
ANISOU 1145  N   VAL B  47     1552   1286   1245   -307    170      4       N  
ATOM   1146  CA  VAL B  47     -24.220  20.281   8.995  1.00 13.52           C  
ANISOU 1146  CA  VAL B  47     1915   1612   1610   -303    184     29       C  
ATOM   1147  C   VAL B  47     -24.180  20.580  10.487  1.00 14.10           C  
ANISOU 1147  C   VAL B  47     1953   1655   1750   -249    196     17       C  
ATOM   1148  O   VAL B  47     -25.192  20.439  11.188  1.00 16.74           O  
ANISOU 1148  O   VAL B  47     2264   1976   2121   -215    175     32       O  
ATOM   1149  CB  VAL B  47     -25.101  21.340   8.313  1.00 16.44           C  
ANISOU 1149  CB  VAL B  47     2310   1969   1968   -314    134    105       C  
ATOM   1150  CG1 VAL B  47     -24.450  22.712   8.437  1.00 18.12           C  
ANISOU 1150  CG1 VAL B  47     2540   2149   2197   -317    155    129       C  
ATOM   1151  CG2 VAL B  47     -25.322  20.986   6.844  1.00 20.19           C  
ANISOU 1151  CG2 VAL B  47     2835   2479   2359   -376    105    126       C  
ATOM   1152  N   GLU B  48     -23.025  21.000  10.984  1.00 15.47           N  
ANISOU 1152  N   GLU B  48     2124   1815   1939   -249    231    -15       N  
ATOM   1153  CA  GLU B  48     -22.878  21.194  12.429  1.00 18.39           C  
ANISOU 1153  CA  GLU B  48     2472   2159   2355   -210    237    -34       C  
ATOM   1154  C   GLU B  48     -23.865  22.220  12.972  1.00 18.65           C  
ANISOU 1154  C   GLU B  48     2502   2162   2421   -184    226      5       C  
ATOM   1155  O   GLU B  48     -24.040  23.293  12.376  1.00 18.92           O  
ANISOU 1155  O   GLU B  48     2548   2177   2462   -194    220     43       O  
ATOM   1156  CB  GLU B  48     -21.442  21.591  12.804  1.00 23.19           C  
ANISOU 1156  CB  GLU B  48     3077   2756   2980   -219    265    -74       C  
ATOM   1157  CG  GLU B  48     -21.244  21.729  14.324  1.00 26.78           C  
ANISOU 1157  CG  GLU B  48     3521   3188   3467   -188    259    -95       C  
ATOM   1158  CD  GLU B  48     -19.792  21.933  14.729  1.00 27.88           C  
ANISOU 1158  CD  GLU B  48     3646   3315   3631   -198    269   -139       C  
ATOM   1159  OE1 GLU B  48     -18.920  21.965  13.836  1.00 29.69           O  
ANISOU 1159  OE1 GLU B  48     3866   3551   3864   -226    293   -160       O  
ATOM   1160  OE2 GLU B  48     -19.528  22.051  15.948  1.00 27.70           O  
ANISOU 1160  OE2 GLU B  48     3625   3277   3625   -182    252   -156       O  
ATOM   1161  N   LEU B  49     -24.508  21.887  14.096  1.00 14.40           N  
ANISOU 1161  N   LEU B  49     1948   1613   1909   -155    228     -7       N  
ATOM   1162  CA  LEU B  49     -25.441  22.798  14.776  1.00 16.46           C  
ANISOU 1162  CA  LEU B  49     2197   1838   2218   -132    236     10       C  
ATOM   1163  C   LEU B  49     -24.693  23.684  15.765  1.00 20.99           C  
ANISOU 1163  C   LEU B  49     2781   2386   2807   -128    265    -19       C  
ATOM   1164  O   LEU B  49     -23.613  23.321  16.249  1.00 20.85           O  
ANISOU 1164  O   LEU B  49     2777   2381   2766   -138    269    -54       O  
ATOM   1165  CB  LEU B  49     -26.534  22.021  15.540  1.00 13.79           C  
ANISOU 1165  CB  LEU B  49     1841   1500   1898   -115    242      2       C  
ATOM   1166  CG  LEU B  49     -27.650  21.330  14.746  1.00 12.58           C  
ANISOU 1166  CG  LEU B  49     1664   1361   1756   -114    212     29       C  
ATOM   1167  CD1 LEU B  49     -28.497  20.422  15.645  1.00 13.12           C  
ANISOU 1167  CD1 LEU B  49     1717   1428   1840   -106    233      9       C  
ATOM   1168  CD2 LEU B  49     -28.535  22.379  14.091  1.00 13.73           C  
ANISOU 1168  CD2 LEU B  49     1784   1476   1955   -104    186     74       C  
ATOM   1169  N   GLN B  50     -25.276  24.841  16.063  1.00 19.06           N  
ANISOU 1169  N   GLN B  50     2527   2101   2615   -115    281     -8       N  
ATOM   1170  CA  GLN B  50     -24.773  25.721  17.121  1.00 20.33           C  
ANISOU 1170  CA  GLN B  50     2698   2231   2794   -115    315    -45       C  
ATOM   1171  C   GLN B  50     -25.918  26.139  18.031  1.00 18.87           C  
ANISOU 1171  C   GLN B  50     2497   2012   2661    -98    351    -62       C  
ATOM   1172  O   GLN B  50     -27.071  26.204  17.592  1.00 17.44           O  
ANISOU 1172  O   GLN B  50     2281   1813   2531    -80    345    -33       O  
ATOM   1173  CB  GLN B  50     -24.121  26.973  16.518  1.00 23.34           C  
ANISOU 1173  CB  GLN B  50     3084   2583   3201   -125    317    -28       C  
ATOM   1174  CG  GLN B  50     -22.841  26.687  15.733  1.00 23.99           C  
ANISOU 1174  CG  GLN B  50     3182   2695   3239   -152    305    -29       C  
ATOM   1175  N   GLU B  51     -25.602  26.431  19.289  1.00 18.28           N  
ANISOU 1175  N   GLU B  51     2446   1925   2576   -108    388   -112       N  
ATOM   1176  CA  GLU B  51     -26.609  26.921  20.228  1.00 20.08           C  
ANISOU 1176  CA  GLU B  51     2663   2116   2852   -103    445   -146       C  
ATOM   1177  C   GLU B  51     -27.269  28.170  19.639  1.00 21.64           C  
ANISOU 1177  C   GLU B  51     2815   2255   3154    -80    454   -124       C  
ATOM   1178  O   GLU B  51     -26.600  29.018  19.043  1.00 20.70           O  
ANISOU 1178  O   GLU B  51     2698   2115   3053    -80    434   -102       O  
ATOM   1179  CB  GLU B  51     -25.980  27.269  21.578  1.00 21.38           C  
ANISOU 1179  CB  GLU B  51     2873   2274   2976   -130    483   -208       C  
ATOM   1180  CG  GLU B  51     -25.111  26.185  22.184  1.00 23.75           C  
ANISOU 1180  CG  GLU B  51     3224   2622   3180   -155    450   -220       C  
ATOM   1181  CD  GLU B  51     -25.907  25.071  22.852  1.00 25.96           C  
ANISOU 1181  CD  GLU B  51     3525   2921   3418   -167    469   -224       C  
ATOM   1182  OE1 GLU B  51     -27.109  24.906  22.563  1.00 22.39           O  
ANISOU 1182  OE1 GLU B  51     3036   2457   3015   -152    500   -213       O  
ATOM   1183  OE2 GLU B  51     -25.312  24.354  23.680  1.00 29.76           O  
ANISOU 1183  OE2 GLU B  51     4061   3425   3821   -194    448   -238       O  
ATOM   1184  N   SER B  52     -28.578  28.282  19.814  1.00 18.10           N  
ANISOU 1184  N   SER B  52     2321   1772   2784    -62    485   -129       N  
ATOM   1185  CA  SER B  52     -29.322  29.436  19.331  1.00 21.54           C  
ANISOU 1185  CA  SER B  52     2701   2137   3345    -34    485   -108       C  
ATOM   1186  C   SER B  52     -30.609  29.529  20.134  1.00 23.55           C  
ANISOU 1186  C   SER B  52     2906   2349   3691    -24    554   -157       C  
ATOM   1187  O   SER B  52     -30.835  28.726  21.040  1.00 26.56           O  
ANISOU 1187  O   SER B  52     3311   2762   4020    -46    605   -204       O  
ATOM   1188  CB  SER B  52     -29.653  29.257  17.855  1.00 19.12           C  
ANISOU 1188  CB  SER B  52     2369   1837   3061    -17    400    -23       C  
ATOM   1189  OG  SER B  52     -30.469  28.116  17.684  1.00 18.79           O  
ANISOU 1189  OG  SER B  52     2304   1829   3007    -13    383    -13       O  
ATOM   1190  N   SER B  53     -31.456  30.500  19.807  1.00 23.10           N  
ANISOU 1190  N   SER B  53     2781   2215   3780      7    557   -145       N  
ATOM   1191  CA  SER B  53     -32.745  30.607  20.473  1.00 21.52           C  
ANISOU 1191  CA  SER B  53     2514   1964   3697     19    629   -199       C  
ATOM   1192  C   SER B  53     -33.641  29.419  20.112  1.00 20.16           C  
ANISOU 1192  C   SER B  53     2305   1828   3526     24    602   -174       C  
ATOM   1193  O   SER B  53     -34.610  29.135  20.802  1.00 24.79           O  
ANISOU 1193  O   SER B  53     2847   2394   4177     20    675   -229       O  
ATOM   1194  CB  SER B  53     -33.429  31.930  20.124  1.00 25.45           C  
ANISOU 1194  CB  SER B  53     2931   2358   4380     57    626   -190       C  
ATOM   1195  OG  SER B  53     -33.498  32.122  18.724  1.00 28.02           O  
ANISOU 1195  OG  SER B  53     3232   2670   4742     84    507    -86       O  
ATOM   1196  N   LYS B  54     -33.291  28.722  19.037  1.00 20.23           N  
ANISOU 1196  N   LYS B  54     2335   1890   3462     27    504    -99       N  
ATOM   1197  CA  LYS B  54     -34.078  27.603  18.528  1.00 20.78           C  
ANISOU 1197  CA  LYS B  54     2371   1994   3531     30    463    -70       C  
ATOM   1198  C   LYS B  54     -33.497  26.239  18.938  1.00 21.61           C  
ANISOU 1198  C   LYS B  54     2545   2180   3486     -4    479    -88       C  
ATOM   1199  O   LYS B  54     -34.235  25.283  19.198  1.00 24.85           O  
ANISOU 1199  O   LYS B  54     2935   2609   3900    -14    502   -105       O  
ATOM   1200  CB  LYS B  54     -34.146  27.681  17.002  1.00 24.31           C  
ANISOU 1200  CB  LYS B  54     2800   2443   3993     47    341     22       C  
ATOM   1201  CG  LYS B  54     -34.953  26.560  16.362  1.00 28.56           C  
ANISOU 1201  CG  LYS B  54     3304   3015   4530     46    285     51       C  
ATOM   1202  CD  LYS B  54     -34.783  26.538  14.851  1.00 28.99           C  
ANISOU 1202  CD  LYS B  54     3375   3090   4551     44    161    140       C  
ATOM   1203  CE  LYS B  54     -35.617  25.415  14.219  1.00 25.47           C  
ANISOU 1203  CE  LYS B  54     2895   2678   4105     37    102    161       C  
ATOM   1204  NZ  LYS B  54     -37.083  25.695  14.240  1.00 24.39           N  
ANISOU 1204  NZ  LYS B  54     2647   2476   4143     67     83    161       N  
ATOM   1205  N   ILE B  55     -32.172  26.159  18.974  1.00 18.16           N  
ANISOU 1205  N   ILE B  55     2184   1785   2932    -23    463    -82       N  
ATOM   1206  CA  ILE B  55     -31.468  24.918  19.250  1.00 17.52           C  
ANISOU 1206  CA  ILE B  55     2163   1769   2723    -50    458    -90       C  
ATOM   1207  C   ILE B  55     -30.763  25.007  20.588  1.00 18.04           C  
ANISOU 1207  C   ILE B  55     2291   1841   2722    -78    522   -147       C  
ATOM   1208  O   ILE B  55     -29.912  25.875  20.792  1.00 14.96           O  
ANISOU 1208  O   ILE B  55     1929   1438   2318    -82    525   -160       O  
ATOM   1209  CB  ILE B  55     -30.391  24.635  18.175  1.00 18.02           C  
ANISOU 1209  CB  ILE B  55     2261   1874   2710    -53    381    -41       C  
ATOM   1210  CG1 ILE B  55     -31.042  24.409  16.813  1.00 21.66           C  
ANISOU 1210  CG1 ILE B  55     2683   2341   3207    -41    309     17       C  
ATOM   1211  CG2 ILE B  55     -29.506  23.422  18.573  1.00 13.99           C  
ANISOU 1211  CG2 ILE B  55     1807   1419   2091    -78    377    -58       C  
ATOM   1212  CD1 ILE B  55     -31.845  23.116  16.725  1.00 21.30           C  
ANISOU 1212  CD1 ILE B  55     2616   2324   3155    -47    300     16       C  
ATOM   1213  N   HIS B  56     -31.092  24.101  21.498  1.00 16.16           N  
ANISOU 1213  N   HIS B  56     2081   1622   2437   -104    568   -179       N  
ATOM   1214  CA  HIS B  56     -30.340  24.008  22.738  1.00 18.78           C  
ANISOU 1214  CA  HIS B  56     2491   1967   2676   -142    607   -222       C  
ATOM   1215  C   HIS B  56     -29.935  22.581  23.040  1.00 19.14           C  
ANISOU 1215  C   HIS B  56     2591   2059   2623   -167    577   -206       C  
ATOM   1216  O   HIS B  56     -30.780  21.694  23.228  1.00 16.86           O  
ANISOU 1216  O   HIS B  56     2295   1776   2336   -179    603   -205       O  
ATOM   1217  CB  HIS B  56     -31.122  24.585  23.925  1.00 26.40           C  
ANISOU 1217  CB  HIS B  56     3462   2894   3676   -168    714   -290       C  
ATOM   1218  CG  HIS B  56     -30.316  24.659  25.187  1.00 33.85           C  
ANISOU 1218  CG  HIS B  56     4500   3851   4512   -218    746   -335       C  
ATOM   1219  ND1 HIS B  56     -30.860  24.451  26.437  1.00 38.47           N  
ANISOU 1219  ND1 HIS B  56     5135   4430   5053   -270    838   -391       N  
ATOM   1220  CD2 HIS B  56     -29.001  24.916  25.387  1.00 36.98           C  
ANISOU 1220  CD2 HIS B  56     4952   4267   4834   -229    695   -332       C  
ATOM   1221  CE1 HIS B  56     -29.914  24.575  27.351  1.00 39.04           C  
ANISOU 1221  CE1 HIS B  56     5299   4519   5016   -314    831   -415       C  
ATOM   1222  NE2 HIS B  56     -28.777  24.856  26.740  1.00 38.56           N  
ANISOU 1222  NE2 HIS B  56     5236   4471   4942   -286    741   -381       N  
ATOM   1223  N   TYR B  57     -28.634  22.358  23.086  1.00 18.33           N  
ANISOU 1223  N   TYR B  57     2538   1983   2445   -174    521   -194       N  
ATOM   1224  CA  TYR B  57     -28.121  21.053  23.455  1.00 19.32           C  
ANISOU 1224  CA  TYR B  57     2713   2138   2488   -195    482   -178       C  
ATOM   1225  C   TYR B  57     -27.261  21.177  24.699  1.00 26.08           C  
ANISOU 1225  C   TYR B  57     3651   2996   3261   -234    480   -204       C  
ATOM   1226  O   TYR B  57     -26.506  22.152  24.866  1.00 24.84           O  
ANISOU 1226  O   TYR B  57     3505   2831   3104   -235    472   -226       O  
ATOM   1227  CB  TYR B  57     -27.343  20.406  22.307  1.00 14.96           C  
ANISOU 1227  CB  TYR B  57     2137   1610   1936   -171    403   -139       C  
ATOM   1228  CG  TYR B  57     -26.299  21.292  21.648  1.00 17.46           C  
ANISOU 1228  CG  TYR B  57     2438   1927   2268   -154    368   -137       C  
ATOM   1229  CD1 TYR B  57     -25.025  21.431  22.191  1.00 19.60           C  
ANISOU 1229  CD1 TYR B  57     2747   2201   2497   -168    336   -153       C  
ATOM   1230  CD2 TYR B  57     -26.572  21.941  20.456  1.00 18.80           C  
ANISOU 1230  CD2 TYR B  57     2557   2091   2496   -131    362   -116       C  
ATOM   1231  CE1 TYR B  57     -24.064  22.223  21.576  1.00 22.14           C  
ANISOU 1231  CE1 TYR B  57     3049   2521   2843   -159    313   -156       C  
ATOM   1232  CE2 TYR B  57     -25.614  22.731  19.830  1.00 18.31           C  
ANISOU 1232  CE2 TYR B  57     2489   2027   2443   -125    339   -112       C  
ATOM   1233  CZ  TYR B  57     -24.372  22.871  20.399  1.00 21.43           C  
ANISOU 1233  CZ  TYR B  57     2914   2425   2803   -140    322   -136       C  
ATOM   1234  OH  TYR B  57     -23.437  23.659  19.779  1.00 26.28           O  
ANISOU 1234  OH  TYR B  57     3516   3033   3435   -140    309   -137       O  
ATOM   1235  N   THR B  58     -27.397  20.196  25.582  1.00 23.92           N  
ANISOU 1235  N   THR B  58     3440   2731   2917   -271    484   -200       N  
ATOM   1236  CA  THR B  58     -26.650  20.192  26.830  1.00 29.46           C  
ANISOU 1236  CA  THR B  58     4234   3434   3523   -319    467   -216       C  
ATOM   1237  C   THR B  58     -25.975  18.842  27.044  1.00 22.85           C  
ANISOU 1237  C   THR B  58     3443   2609   2627   -331    382   -170       C  
ATOM   1238  O   THR B  58     -26.340  17.850  26.404  1.00 15.58           O  
ANISOU 1238  O   THR B  58     2490   1693   1737   -311    365   -137       O  
ATOM   1239  CB  THR B  58     -27.565  20.495  28.031  1.00 33.28           C  
ANISOU 1239  CB  THR B  58     4778   3905   3961   -375    568   -261       C  
ATOM   1240  OG1 THR B  58     -28.478  19.411  28.225  1.00 40.11           O  
ANISOU 1240  OG1 THR B  58     5658   4771   4810   -397    604   -241       O  
ATOM   1241  CG2 THR B  58     -28.364  21.757  27.790  1.00 36.38           C  
ANISOU 1241  CG2 THR B  58     5109   4272   4444   -358    659   -310       C  
ATOM   1242  N   ASN B  59     -24.973  18.836  27.921  1.00 17.20           N  
ANISOU 1242  N   ASN B  59     2800   1894   1838   -363    321   -170       N  
ATOM   1243  CA  ASN B  59     -24.265  17.637  28.335  1.00 17.80           C  
ANISOU 1243  CA  ASN B  59     2930   1970   1865   -379    226   -124       C  
ATOM   1244  C   ASN B  59     -24.224  17.651  29.854  1.00 22.12           C  
ANISOU 1244  C   ASN B  59     3601   2512   2290   -454    225   -129       C  
ATOM   1245  O   ASN B  59     -23.539  18.472  30.457  1.00 24.10           O  
ANISOU 1245  O   ASN B  59     3892   2765   2500   -480    201   -158       O  
ATOM   1246  CB  ASN B  59     -22.842  17.641  27.769  1.00 24.80           C  
ANISOU 1246  CB  ASN B  59     3771   2854   2798   -342    121   -113       C  
ATOM   1247  CG  ASN B  59     -22.016  16.454  28.225  1.00 32.58           C  
ANISOU 1247  CG  ASN B  59     4798   3824   3759   -353      8    -67       C  
ATOM   1248  OD1 ASN B  59     -22.387  15.733  29.152  1.00 35.76           O  
ANISOU 1248  OD1 ASN B  59     5287   4217   4082   -398     -4    -36       O  
ATOM   1249  ND2 ASN B  59     -20.875  16.246  27.569  1.00 36.55           N  
ANISOU 1249  ND2 ASN B  59     5236   4317   4335   -313    -74    -62       N  
ATOM   1250  N   THR B  60     -24.985  16.764  30.475  1.00 20.92           N  
ANISOU 1250  N   THR B  60     3517   2356   2077   -499    257   -104       N  
ATOM   1251  CA  THR B  60     -24.981  16.653  31.925  1.00 23.18           C  
ANISOU 1251  CA  THR B  60     3942   2639   2226   -586    257   -101       C  
ATOM   1252  C   THR B  60     -24.541  15.247  32.291  1.00 25.20           C  
ANISOU 1252  C   THR B  60     4262   2878   2434   -606    149    -23       C  
ATOM   1253  O   THR B  60     -25.309  14.298  32.158  1.00 19.94           O  
ANISOU 1253  O   THR B  60     3599   2201   1776   -612    184      9       O  
ATOM   1254  CB  THR B  60     -26.373  16.953  32.522  1.00 25.52           C  
ANISOU 1254  CB  THR B  60     4281   2937   2479   -643    414   -146       C  
ATOM   1255  OG1 THR B  60     -26.824  18.232  32.061  1.00 28.52           O  
ANISOU 1255  OG1 THR B  60     4581   3319   2938   -612    508   -217       O  
ATOM   1256  CG2 THR B  60     -26.324  16.950  34.053  1.00 28.06           C  
ANISOU 1256  CG2 THR B  60     4766   3260   2637   -751    427   -154       C  
ATOM   1257  N   SER B  61     -23.285  15.124  32.714  1.00 29.27           N  
ANISOU 1257  N   SER B  61     4819   3384   2917   -613     11      8       N  
ATOM   1258  CA  SER B  61     -22.719  13.842  33.134  1.00 33.35           C  
ANISOU 1258  CA  SER B  61     5398   3872   3402   -630   -117     88       C  
ATOM   1259  C   SER B  61     -22.954  12.686  32.161  1.00 27.74           C  
ANISOU 1259  C   SER B  61     4603   3139   2797   -571   -133    129       C  
ATOM   1260  O   SER B  61     -23.327  11.585  32.568  1.00 30.18           O  
ANISOU 1260  O   SER B  61     4977   3423   3067   -604   -153    187       O  
ATOM   1261  CB  SER B  61     -23.241  13.457  34.522  1.00 39.12           C  
ANISOU 1261  CB  SER B  61     6297   4598   3968   -736    -99    119       C  
ATOM   1262  OG  SER B  61     -22.887  14.430  35.483  1.00 44.06           O  
ANISOU 1262  OG  SER B  61     7015   5242   4484   -801   -102     80       O  
ATOM   1263  N   GLY B  62     -22.722  12.927  30.880  1.00 24.88           N  
ANISOU 1263  N   GLY B  62     4105   2785   2564   -491   -122     99       N  
ATOM   1264  CA  GLY B  62     -22.857  11.875  29.894  1.00 24.09           C  
ANISOU 1264  CA  GLY B  62     3925   2666   2564   -440   -137    125       C  
ATOM   1265  C   GLY B  62     -24.241  11.835  29.275  1.00 20.70           C  
ANISOU 1265  C   GLY B  62     3452   2254   2159   -433     -5    101       C  
ATOM   1266  O   GLY B  62     -24.424  11.243  28.217  1.00 16.83           O  
ANISOU 1266  O   GLY B  62     2876   1758   1759   -386      0    102       O  
ATOM   1267  N   VAL B  63     -25.214  12.457  29.939  1.00 17.09           N  
ANISOU 1267  N   VAL B  63     3052   1815   1628   -484    101     74       N  
ATOM   1268  CA  VAL B  63     -26.556  12.571  29.387  1.00 13.15           C  
ANISOU 1268  CA  VAL B  63     2496   1327   1171   -477    226     43       C  
ATOM   1269  C   VAL B  63     -26.644  13.765  28.435  1.00 15.55           C  
ANISOU 1269  C   VAL B  63     2698   1656   1555   -424    272    -11       C  
ATOM   1270  O   VAL B  63     -26.476  14.918  28.838  1.00 15.23           O  
ANISOU 1270  O   VAL B  63     2674   1626   1486   -436    303    -50       O  
ATOM   1271  CB  VAL B  63     -27.632  12.692  30.481  1.00 15.07           C  
ANISOU 1271  CB  VAL B  63     2831   1570   1324   -557    336     27       C  
ATOM   1272  CG1 VAL B  63     -29.009  12.760  29.839  1.00 15.92           C  
ANISOU 1272  CG1 VAL B  63     2856   1682   1509   -543    456     -9       C  
ATOM   1273  CG2 VAL B  63     -27.545  11.510  31.465  1.00 13.78           C  
ANISOU 1273  CG2 VAL B  63     2790   1380   1066   -623    289     91       C  
ATOM   1274  N   LEU B  64     -26.881  13.474  27.160  1.00 14.29           N  
ANISOU 1274  N   LEU B  64     2439   1501   1491   -369    271    -11       N  
ATOM   1275  CA  LEU B  64     -26.845  14.498  26.126  1.00 14.31           C  
ANISOU 1275  CA  LEU B  64     2350   1521   1565   -320    292    -45       C  
ATOM   1276  C   LEU B  64     -28.256  14.753  25.671  1.00 17.32           C  
ANISOU 1276  C   LEU B  64     2678   1906   1997   -316    385    -66       C  
ATOM   1277  O   LEU B  64     -28.962  13.816  25.280  1.00 17.12           O  
ANISOU 1277  O   LEU B  64     2627   1876   2001   -315    397    -50       O  
ATOM   1278  CB  LEU B  64     -26.022  14.029  24.918  1.00  7.83           C  
ANISOU 1278  CB  LEU B  64     1461    705    811   -270    218    -32       C  
ATOM   1279  CG  LEU B  64     -24.609  13.526  25.202  1.00 13.97           C  
ANISOU 1279  CG  LEU B  64     2263   1466   1578   -265    116    -12       C  
ATOM   1280  CD1 LEU B  64     -23.855  13.310  23.894  1.00 11.73           C  
ANISOU 1280  CD1 LEU B  64     1895   1186   1376   -219     76    -22       C  
ATOM   1281  CD2 LEU B  64     -23.893  14.520  26.088  1.00 14.74           C  
ANISOU 1281  CD2 LEU B  64     2410   1566   1624   -287     96    -28       C  
ATOM   1282  N  ATHR B  65     -28.680  16.014  25.722  0.54 15.48           N  
ANISOU 1282  N  ATHR B  65     2421   1675   1786   -312    448   -105       N  
ATOM   1283  N  BTHR B  65     -28.682  16.013  25.714  0.46 15.60           N  
ANISOU 1283  N  BTHR B  65     2435   1690   1802   -312    448   -105       N  
ATOM   1284  CA ATHR B  65     -30.013  16.371  25.259  0.54 16.25           C  
ANISOU 1284  CA ATHR B  65     2449   1765   1958   -301    526   -127       C  
ATOM   1285  CA BTHR B  65     -30.022  16.357  25.257  0.46 16.26           C  
ANISOU 1285  CA BTHR B  65     2451   1767   1960   -301    526   -127       C  
ATOM   1286  C  ATHR B  65     -29.949  17.416  24.156  0.54 16.49           C  
ANISOU 1286  C  ATHR B  65     2399   1799   2069   -251    511   -135       C  
ATOM   1287  C  BTHR B  65     -29.978  17.432  24.179  0.46 16.44           C  
ANISOU 1287  C  BTHR B  65     2392   1791   2062   -252    514   -136       C  
ATOM   1288  O  ATHR B  65     -29.090  18.301  24.178  0.54 15.60           O  
ANISOU 1288  O  ATHR B  65     2297   1688   1944   -240    487   -145       O  
ATOM   1289  O  BTHR B  65     -29.160  18.353  24.239  0.46 15.80           O  
ANISOU 1289  O  BTHR B  65     2322   1711   1969   -242    494   -148       O  
ATOM   1290  CB ATHR B  65     -30.902  16.897  26.412  0.54 17.36           C  
ANISOU 1290  CB ATHR B  65     2629   1888   2078   -351    636   -171       C  
ATOM   1291  CB BTHR B  65     -30.922  16.831  26.424  0.46 17.33           C  
ANISOU 1291  CB BTHR B  65     2627   1885   2073   -352    636   -170       C  
ATOM   1292  OG1ATHR B  65     -30.205  17.925  27.129  0.54 16.03           O  
ANISOU 1292  OG1ATHR B  65     2512   1718   1861   -368    645   -201       O  
ATOM   1293  OG1BTHR B  65     -30.915  15.849  27.467  0.46 18.95           O  
ANISOU 1293  OG1BTHR B  65     2929   2087   2184   -412    648   -153       O  
ATOM   1294  CG2ATHR B  65     -31.255  15.770  27.364  0.54 18.66           C  
ANISOU 1294  CG2ATHR B  65     2876   2048   2168   -411    666   -156       C  
ATOM   1295  CG2BTHR B  65     -32.349  17.048  25.944  0.46 15.95           C  
ANISOU 1295  CG2BTHR B  65     2364   1693   2005   -339    714   -195       C  
ATOM   1296  N   LEU B  66     -30.856  17.298  23.190  1.00 15.91           N  
ANISOU 1296  N   LEU B  66     2247   1724   2074   -225    518   -127       N  
ATOM   1297  CA  LEU B  66     -31.005  18.295  22.140  1.00 14.26           C  
ANISOU 1297  CA  LEU B  66     1967   1510   1940   -185    500   -125       C  
ATOM   1298  C   LEU B  66     -32.465  18.702  22.073  1.00 16.60           C  
ANISOU 1298  C   LEU B  66     2196   1779   2331   -180    561   -144       C  
ATOM   1299  O   LEU B  66     -33.350  17.855  21.881  1.00 17.60           O  
ANISOU 1299  O   LEU B  66     2290   1905   2490   -188    573   -139       O  
ATOM   1300  CB  LEU B  66     -30.591  17.750  20.770  1.00 15.63           C  
ANISOU 1300  CB  LEU B  66     2107   1708   2124   -159    421    -89       C  
ATOM   1301  CG  LEU B  66     -31.001  18.634  19.574  1.00 14.29           C  
ANISOU 1301  CG  LEU B  66     1872   1533   2024   -129    396    -73       C  
ATOM   1302  CD1 LEU B  66     -30.269  19.978  19.557  1.00 12.61           C  
ANISOU 1302  CD1 LEU B  66     1668   1308   1816   -117    394    -77       C  
ATOM   1303  CD2 LEU B  66     -30.806  17.909  18.250  1.00 13.44           C  
ANISOU 1303  CD2 LEU B  66     1745   1454   1910   -122    329    -44       C  
ATOM   1304  N   GLU B  67     -32.719  19.993  22.237  1.00 19.17           N  
ANISOU 1304  N   GLU B  67     2493   2075   2715   -168    600   -169       N  
ATOM   1305  CA  GLU B  67     -34.057  20.520  22.030  1.00 23.28           C  
ANISOU 1305  CA  GLU B  67     2928   2557   3361   -152    646   -188       C  
ATOM   1306  C   GLU B  67     -34.144  21.375  20.779  1.00 20.83           C  
ANISOU 1306  C   GLU B  67     2549   2230   3134   -107    577   -152       C  
ATOM   1307  O   GLU B  67     -33.278  22.220  20.525  1.00 13.10           O  
ANISOU 1307  O   GLU B  67     1592   1249   2135    -93    546   -140       O  
ATOM   1308  CB  GLU B  67     -34.555  21.325  23.225  1.00 27.69           C  
ANISOU 1308  CB  GLU B  67     3492   3076   3954   -177    758   -253       C  
ATOM   1309  CG  GLU B  67     -35.860  22.037  22.887  1.00 35.71           C  
ANISOU 1309  CG  GLU B  67     4396   4037   5136   -150    798   -276       C  
ATOM   1310  CD  GLU B  67     -36.698  22.381  24.097  1.00 45.42           C  
ANISOU 1310  CD  GLU B  67     5616   5226   6417   -187    939   -358       C  
ATOM   1311  OE1 GLU B  67     -36.208  23.119  24.977  1.00 49.51           O  
ANISOU 1311  OE1 GLU B  67     6190   5730   6891   -211   1001   -405       O  
ATOM   1312  OE2 GLU B  67     -37.856  21.918  24.159  1.00 47.83           O  
ANISOU 1312  OE2 GLU B  67     5855   5509   6809   -196    992   -381       O  
ATOM   1313  N   ILE B  68     -35.204  21.143  20.007  1.00 19.81           N  
ANISOU 1313  N   ILE B  68     2340   2087   3098    -89    549   -133       N  
ATOM   1314  CA  ILE B  68     -35.490  21.927  18.819  1.00 17.81           C  
ANISOU 1314  CA  ILE B  68     2025   1812   2931    -52    472    -90       C  
ATOM   1315  C   ILE B  68     -36.840  22.627  19.012  1.00 19.46           C  
ANISOU 1315  C   ILE B  68     2133   1954   3307    -32    514   -117       C  
ATOM   1316  O   ILE B  68     -37.870  21.971  19.168  1.00 16.31           O  
ANISOU 1316  O   ILE B  68     1678   1545   2972    -41    543   -138       O  
ATOM   1317  CB  ILE B  68     -35.534  21.030  17.566  1.00 16.13           C  
ANISOU 1317  CB  ILE B  68     1802   1638   2687    -51    374    -38       C  
ATOM   1318  CG1 ILE B  68     -34.257  20.189  17.476  1.00 19.45           C  
ANISOU 1318  CG1 ILE B  68     2309   2116   2964    -72    352    -28       C  
ATOM   1319  CG2 ILE B  68     -35.677  21.869  16.327  1.00 15.87           C  
ANISOU 1319  CG2 ILE B  68     1732   1587   2711    -25    282     17       C  
ATOM   1320  CD1 ILE B  68     -34.453  18.850  16.832  1.00 16.16           C  
ANISOU 1320  CD1 ILE B  68     1891   1736   2511    -87    308    -14       C  
ATOM   1321  N   LEU B  69     -36.836  23.955  19.020  1.00 18.05           N  
ANISOU 1321  N   LEU B  69     1925   1722   3211     -7    520   -120       N  
ATOM   1322  CA  LEU B  69     -38.070  24.693  19.252  1.00 16.52           C  
ANISOU 1322  CA  LEU B  69     1624   1450   3201     16    565   -154       C  
ATOM   1323  C   LEU B  69     -38.822  24.975  17.954  1.00 18.68           C  
ANISOU 1323  C   LEU B  69     1810   1692   3598     53    445    -88       C  
ATOM   1324  O   LEU B  69     -38.214  25.250  16.919  1.00 20.71           O  
ANISOU 1324  O   LEU B  69     2100   1967   3804     65    337    -15       O  
ATOM   1325  CB  LEU B  69     -37.796  26.009  19.985  1.00 17.52           C  
ANISOU 1325  CB  LEU B  69     1753   1520   3383     24    638   -201       C  
ATOM   1326  CG  LEU B  69     -37.133  25.989  21.360  1.00 21.08           C  
ANISOU 1326  CG  LEU B  69     2291   1991   3726    -20    755   -274       C  
ATOM   1327  CD1 LEU B  69     -37.173  27.394  21.977  1.00 20.62           C  
ANISOU 1327  CD1 LEU B  69     2209   1859   3766    -10    830   -332       C  
ATOM   1328  CD2 LEU B  69     -37.839  25.006  22.257  1.00 23.00           C  
ANISOU 1328  CD2 LEU B  69     2538   2251   3951    -61    853   -331       C  
ATOM   1329  N   ASP B  70     -40.146  24.914  18.028  1.00 20.93           N  
ANISOU 1329  N   ASP B  70     1983   1926   4044     67    465   -115       N  
ATOM   1330  CA  ASP B  70     -41.009  25.416  16.964  1.00 20.83           C  
ANISOU 1330  CA  ASP B  70     1867   1858   4190    106    348    -58       C  
ATOM   1331  C   ASP B  70     -40.646  24.754  15.645  1.00 20.19           C  
ANISOU 1331  C   ASP B  70     1832   1840   3999     98    202     30       C  
ATOM   1332  O   ASP B  70     -40.281  25.427  14.684  1.00 17.58           O  
ANISOU 1332  O   ASP B  70     1521   1497   3660    114     91    106       O  
ATOM   1333  CB  ASP B  70     -40.859  26.935  16.853  1.00 21.84           C  
ANISOU 1333  CB  ASP B  70     1966   1906   4424    143    329    -41       C  
ATOM   1334  CG  ASP B  70     -41.957  27.578  16.033  1.00 23.35           C  
ANISOU 1334  CG  ASP B  70     2030   2012   4829    188    222      7       C  
ATOM   1335  OD1 ASP B  70     -42.718  26.855  15.365  1.00 23.29           O  
ANISOU 1335  OD1 ASP B  70     1966   2018   4864    187    138     39       O  
ATOM   1336  OD2 ASP B  70     -42.052  28.820  16.051  1.00 22.04           O  
ANISOU 1336  OD2 ASP B  70     1820   1760   4796    222    215     14       O  
ATOM   1337  N   CYS B  71     -40.767  23.430  15.606  1.00 22.04           N  
ANISOU 1337  N   CYS B  71     2088   2137   4150     67    206     19       N  
ATOM   1338  CA  CYS B  71     -40.334  22.644  14.454  1.00 19.30           C  
ANISOU 1338  CA  CYS B  71     1798   1857   3679     48     91     82       C  
ATOM   1339  C   CYS B  71     -41.123  22.953  13.182  1.00 20.12           C  
ANISOU 1339  C   CYS B  71     1833   1930   3880     64    -61    154       C  
ATOM   1340  O   CYS B  71     -42.356  22.986  13.182  1.00 23.02           O  
ANISOU 1340  O   CYS B  71     2084   2245   4418     83    -83    141       O  
ATOM   1341  CB  CYS B  71     -40.415  21.148  14.770  1.00 15.15           C  
ANISOU 1341  CB  CYS B  71     1297   1389   3070     11    136     45       C  
ATOM   1342  SG  CYS B  71     -39.319  20.625  16.111  1.00 20.12           S  
ANISOU 1342  SG  CYS B  71     2033   2061   3551    -18    275    -14       S  
ATOM   1343  N   HIS B  72     -40.392  23.181  12.100  1.00 18.53           N  
ANISOU 1343  N   HIS B  72     1708   1762   3572     53   -168    228       N  
ATOM   1344  CA  HIS B  72     -40.988  23.394  10.789  1.00 22.73           C  
ANISOU 1344  CA  HIS B  72     2209   2278   4150     53   -332    309       C  
ATOM   1345  C   HIS B  72     -40.445  22.341   9.842  1.00 20.12           C  
ANISOU 1345  C   HIS B  72     1969   2036   3640      2   -397    336       C  
ATOM   1346  O   HIS B  72     -39.597  21.541  10.239  1.00 16.29           O  
ANISOU 1346  O   HIS B  72     1556   1612   3020    -24   -312    291       O  
ATOM   1347  CB  HIS B  72     -40.704  24.812  10.294  1.00 30.36           C  
ANISOU 1347  CB  HIS B  72     3189   3185   5160     75   -404    380       C  
ATOM   1348  CG  HIS B  72     -41.507  25.852  11.010  1.00 40.74           C  
ANISOU 1348  CG  HIS B  72     4389   4394   6696    128   -367    357       C  
ATOM   1349  ND1 HIS B  72     -42.861  26.019  10.806  1.00 45.23           N  
ANISOU 1349  ND1 HIS B  72     4824   4892   7471    158   -440    367       N  
ATOM   1350  CD2 HIS B  72     -41.158  26.754  11.962  1.00 45.67           C  
ANISOU 1350  CD2 HIS B  72     5006   4968   7380    154   -257    312       C  
ATOM   1351  CE1 HIS B  72     -43.308  26.988  11.586  1.00 50.11           C  
ANISOU 1351  CE1 HIS B  72     5352   5415   8273    202   -371    328       C  
ATOM   1352  NE2 HIS B  72     -42.292  27.450  12.295  1.00 50.73           N  
ANISOU 1352  NE2 HIS B  72     5510   5506   8260    198   -257    293       N  
ATOM   1353  N   THR B  73     -40.942  22.315   8.609  1.00 21.78           N  
ANISOU 1353  N   THR B  73     2478   2619   3176   -235   -622    316       N  
ATOM   1354  CA  THR B  73     -40.608  21.215   7.696  1.00 26.14           C  
ANISOU 1354  CA  THR B  73     3080   3342   3511   -158   -605    288       C  
ATOM   1355  C   THR B  73     -39.108  21.083   7.448  1.00 28.24           C  
ANISOU 1355  C   THR B  73     3364   3758   3608   -133   -537    423       C  
ATOM   1356  O   THR B  73     -38.582  19.973   7.363  1.00 28.61           O  
ANISOU 1356  O   THR B  73     3464   3895   3512    -85   -480    340       O  
ATOM   1357  CB  THR B  73     -41.354  21.329   6.369  1.00 29.08           C  
ANISOU 1357  CB  THR B  73     3428   3810   3813    -90   -721    309       C  
ATOM   1358  OG1 THR B  73     -42.749  21.114   6.603  1.00 35.37           O  
ANISOU 1358  OG1 THR B  73     4209   4465   4764   -104   -778    141       O  
ATOM   1359  CG2 THR B  73     -40.858  20.284   5.390  1.00 28.01           C  
ANISOU 1359  CG2 THR B  73     3336   3879   3426     18   -718    273       C  
ATOM   1360  N   ASP B  74     -38.426  22.220   7.357  1.00 26.90           N  
ANISOU 1360  N   ASP B  74     3136   3602   3484   -167   -552    632       N  
ATOM   1361  CA  ASP B  74     -36.984  22.241   7.162  1.00 28.02           C  
ANISOU 1361  CA  ASP B  74     3266   3874   3507   -154   -485    789       C  
ATOM   1362  C   ASP B  74     -36.203  21.607   8.327  1.00 26.85           C  
ANISOU 1362  C   ASP B  74     3171   3652   3379   -185   -389    688       C  
ATOM   1363  O   ASP B  74     -35.010  21.321   8.184  1.00 25.54           O  
ANISOU 1363  O   ASP B  74     3004   3599   3100   -162   -325    771       O  
ATOM   1364  CB  ASP B  74     -36.499  23.678   6.918  1.00 28.57           C  
ANISOU 1364  CB  ASP B  74     3236   3928   3693   -201   -537   1052       C  
ATOM   1365  N   ASP B  75     -36.860  21.399   9.472  1.00 19.23           N  
ANISOU 1365  N   ASP B  75     2244   2511   2551   -230   -376    519       N  
ATOM   1366  CA  ASP B  75     -36.200  20.789  10.639  1.00 17.36           C  
ANISOU 1366  CA  ASP B  75     2066   2208   2324   -252   -292    427       C  
ATOM   1367  C   ASP B  75     -36.178  19.256  10.575  1.00 18.72           C  
ANISOU 1367  C   ASP B  75     2312   2444   2357   -207   -234    282       C  
ATOM   1368  O   ASP B  75     -35.503  18.605  11.379  1.00 18.42           O  
ANISOU 1368  O   ASP B  75     2324   2377   2298   -215   -168    226       O  
ATOM   1369  CB  ASP B  75     -36.853  21.234  11.951  1.00 17.07           C  
ANISOU 1369  CB  ASP B  75     2033   1984   2469   -304   -294    324       C  
ATOM   1370  CG  ASP B  75     -36.716  22.735  12.191  1.00 19.06           C  
ANISOU 1370  CG  ASP B  75     2206   2142   2893   -340   -374    437       C  
ATOM   1371  OD1 ASP B  75     -35.639  23.283  11.875  1.00 15.97           O  
ANISOU 1371  OD1 ASP B  75     1771   1794   2504   -347   -392    602       O  
ATOM   1372  OD2 ASP B  75     -37.686  23.368  12.671  1.00 17.40           O  
ANISOU 1372  OD2 ASP B  75     1965   1813   2836   -359   -426    362       O  
ATOM   1373  N   SER B  76     -36.933  18.683   9.637  1.00 15.35           N  
ANISOU 1373  N   SER B  76     1886   2091   1854   -153   -278    214       N  
ATOM   1374  CA  SER B  76     -36.919  17.235   9.430  1.00 18.16           C  
ANISOU 1374  CA  SER B  76     2295   2498   2108    -97   -261     67       C  
ATOM   1375  C   SER B  76     -35.541  16.752   9.006  1.00 18.23           C  
ANISOU 1375  C   SER B  76     2319   2665   1945    -39   -217    120       C  
ATOM   1376  O   SER B  76     -34.717  17.530   8.534  1.00 21.28           O  
ANISOU 1376  O   SER B  76     2661   3162   2263    -28   -205    290       O  
ATOM   1377  CB  SER B  76     -37.958  16.836   8.375  1.00 19.00           C  
ANISOU 1377  CB  SER B  76     2385   2656   2177    -32   -352    -23       C  
ATOM   1378  OG  SER B  76     -39.248  17.264   8.776  1.00 19.40           O  
ANISOU 1378  OG  SER B  76     2409   2555   2407    -87   -391    -75       O  
ATOM   1379  N   GLY B  77     -35.287  15.460   9.173  1.00 18.05           N  
ANISOU 1379  N   GLY B  77     2343   2646   1869      0   -198    -19       N  
ATOM   1380  CA  GLY B  77     -34.048  14.884   8.702  1.00 16.92           C  
ANISOU 1380  CA  GLY B  77     2207   2661   1563     74   -167     -5       C  
ATOM   1381  C   GLY B  77     -33.267  14.265   9.837  1.00 16.84           C  
ANISOU 1381  C   GLY B  77     2244   2550   1603     32   -103    -49       C  
ATOM   1382  O   GLY B  77     -33.826  13.939  10.883  1.00 16.00           O  
ANISOU 1382  O   GLY B  77     2177   2272   1631    -33    -89   -124       O  
ATOM   1383  N   THR B  78     -31.960  14.122   9.652  1.00 14.04           N  
ANISOU 1383  N   THR B  78     1881   2313   1142     73    -60     10       N  
ATOM   1384  CA  THR B  78     -31.164  13.431  10.656  1.00 14.68           C  
ANISOU 1384  CA  THR B  78     2010   2305   1263     47    -16    -43       C  
ATOM   1385  C   THR B  78     -30.545  14.378  11.659  1.00 12.03           C  
ANISOU 1385  C   THR B  78     1672   1875   1022    -36     30     82       C  
ATOM   1386  O   THR B  78     -30.095  15.462  11.301  1.00 12.29           O  
ANISOU 1386  O   THR B  78     1642   1973   1056    -48     36    239       O  
ATOM   1387  CB  THR B  78     -30.055  12.574  10.018  1.00 14.94           C  
ANISOU 1387  CB  THR B  78     2032   2496   1149    147     -7    -89       C  
ATOM   1388  OG1 THR B  78     -29.226  13.406   9.197  1.00 16.84           O  
ANISOU 1388  OG1 THR B  78     2198   2927   1274    187     30     76       O  
ATOM   1389  CG2 THR B  78     -30.672  11.507   9.155  1.00 16.62           C  
ANISOU 1389  CG2 THR B  78     2250   2776   1288    247    -83   -264       C  
ATOM   1390  N   TYR B  79     -30.502  13.951  12.917  1.00  9.32           N  
ANISOU 1390  N   TYR B  79     1393   1381    769    -85     51     16       N  
ATOM   1391  CA  TYR B  79     -29.754  14.663  13.937  1.00 11.35           C  
ANISOU 1391  CA  TYR B  79     1658   1554   1101   -136     75     94       C  
ATOM   1392  C   TYR B  79     -28.702  13.712  14.513  1.00 14.19           C  
ANISOU 1392  C   TYR B  79     2066   1898   1427   -115     97     40       C  
ATOM   1393  O   TYR B  79     -29.017  12.583  14.882  1.00 15.31           O  
ANISOU 1393  O   TYR B  79     2267   1984   1567   -106     95    -73       O  
ATOM   1394  CB  TYR B  79     -30.694  15.212  15.022  1.00  8.29           C  
ANISOU 1394  CB  TYR B  79     1301   1014    837   -199     73     66       C  
ATOM   1395  CG  TYR B  79     -31.503  16.391  14.519  1.00 11.63           C  
ANISOU 1395  CG  TYR B  79     1659   1438   1323   -221     36    135       C  
ATOM   1396  CD1 TYR B  79     -31.021  17.699  14.639  1.00 10.96           C  
ANISOU 1396  CD1 TYR B  79     1515   1327   1323   -246      4    255       C  
ATOM   1397  CD2 TYR B  79     -32.720  16.197  13.879  1.00 15.61           C  
ANISOU 1397  CD2 TYR B  79     2150   1956   1826   -214     15     82       C  
ATOM   1398  CE1 TYR B  79     -31.744  18.775  14.159  1.00 14.08           C  
ANISOU 1398  CE1 TYR B  79     1843   1709   1800   -267    -47    325       C  
ATOM   1399  CE2 TYR B  79     -33.457  17.270  13.402  1.00 17.16           C  
ANISOU 1399  CE2 TYR B  79     2285   2147   2088   -231    -32    146       C  
ATOM   1400  CZ  TYR B  79     -32.957  18.555  13.540  1.00 16.89           C  
ANISOU 1400  CZ  TYR B  79     2195   2086   2135   -259    -62    272       C  
ATOM   1401  OH  TYR B  79     -33.669  19.625  13.052  1.00 17.17           O  
ANISOU 1401  OH  TYR B  79     2163   2103   2258   -277   -125    344       O  
ATOM   1402  N   ARG B  80     -27.451  14.154  14.547  1.00  9.63           N  
ANISOU 1402  N   ARG B  80     1453   1363    844   -107    107    129       N  
ATOM   1403  CA  ARG B  80     -26.361  13.262  14.941  1.00 12.68           C  
ANISOU 1403  CA  ARG B  80     1873   1747   1198    -76    118     79       C  
ATOM   1404  C   ARG B  80     -25.490  13.861  16.031  1.00 13.10           C  
ANISOU 1404  C   ARG B  80     1938   1697   1343   -112    109    132       C  
ATOM   1405  O   ARG B  80     -25.048  15.012  15.919  1.00 12.51           O  
ANISOU 1405  O   ARG B  80     1789   1628   1337   -133     96    253       O  
ATOM   1406  CB  ARG B  80     -25.499  12.892  13.713  1.00 12.35           C  
ANISOU 1406  CB  ARG B  80     1759   1896   1039      3    134    103       C  
ATOM   1407  CG  ARG B  80     -24.359  11.915  14.034  1.00 11.54           C  
ANISOU 1407  CG  ARG B  80     1677   1795    911     46    136     32       C  
ATOM   1408  CD  ARG B  80     -23.644  11.425  12.765  1.00 15.35           C  
ANISOU 1408  CD  ARG B  80     2082   2494   1257    150    157     20       C  
ATOM   1409  NE  ARG B  80     -23.516  12.497  11.784  1.00 18.51           N  
ANISOU 1409  NE  ARG B  80     2376   3058   1597    164    197    186       N  
ATOM   1410  CZ  ARG B  80     -22.396  13.154  11.490  1.00 25.64           C  
ANISOU 1410  CZ  ARG B  80     3178   4063   2503    172    243    341       C  
ATOM   1411  NH1 ARG B  80     -21.255  12.837  12.077  1.00 19.99           N  
ANISOU 1411  NH1 ARG B  80     2453   3301   1843    175    251    329       N  
ATOM   1412  NH2 ARG B  80     -22.422  14.122  10.570  1.00 27.32           N  
ANISOU 1412  NH2 ARG B  80     3287   4424   2670    179    280    524       N  
ATOM   1413  N   ALA B  81     -25.245  13.084  17.087  1.00  9.42           N  
ANISOU 1413  N   ALA B  81     1559   1129    891   -115    102     47       N  
ATOM   1414  CA  ALA B  81     -24.277  13.483  18.100  1.00 11.29           C  
ANISOU 1414  CA  ALA B  81     1815   1279   1195   -125     75     73       C  
ATOM   1415  C   ALA B  81     -22.965  12.736  17.876  1.00 12.36           C  
ANISOU 1415  C   ALA B  81     1933   1465   1298    -81     73     61       C  
ATOM   1416  O   ALA B  81     -22.942  11.506  17.747  1.00 13.14           O  
ANISOU 1416  O   ALA B  81     2075   1580   1336    -48     77    -29       O  
ATOM   1417  CB  ALA B  81     -24.812  13.238  19.513  1.00  7.54           C  
ANISOU 1417  CB  ALA B  81     1448    675    743   -144     65      1       C  
ATOM   1418  N   VAL B  82     -21.878  13.490  17.797  1.00 12.37           N  
ANISOU 1418  N   VAL B  82     1855   1482   1364    -78     57    152       N  
ATOM   1419  CA  VAL B  82     -20.553  12.907  17.672  1.00 11.93           C  
ANISOU 1419  CA  VAL B  82     1765   1466   1301    -36     55    146       C  
ATOM   1420  C   VAL B  82     -19.767  13.167  18.952  1.00 14.55           C  
ANISOU 1420  C   VAL B  82     2139   1649   1739    -48    -10    133       C  
ATOM   1421  O   VAL B  82     -19.546  14.315  19.346  1.00 11.29           O  
ANISOU 1421  O   VAL B  82     1679   1165   1444    -75    -55    204       O  
ATOM   1422  CB  VAL B  82     -19.796  13.482  16.478  1.00  9.01           C  
ANISOU 1422  CB  VAL B  82     1243   1253    927    -13     96    278       C  
ATOM   1423  CG1 VAL B  82     -18.392  12.896  16.405  1.00 10.42           C  
ANISOU 1423  CG1 VAL B  82     1370   1477   1111     36    101    266       C  
ATOM   1424  CG2 VAL B  82     -20.576  13.209  15.180  1.00 12.27           C  
ANISOU 1424  CG2 VAL B  82     1622   1841   1200     23    150    280       C  
ATOM   1425  N   CYS B  83     -19.345  12.090  19.596  1.00 12.06           N  
ANISOU 1425  N   CYS B  83     1909   1279   1393    -21    -34     35       N  
ATOM   1426  CA  CYS B  83     -18.666  12.187  20.877  1.00 13.59           C  
ANISOU 1426  CA  CYS B  83     2166   1337   1660    -16   -108      5       C  
ATOM   1427  C   CYS B  83     -17.229  11.723  20.736  1.00 14.65           C  
ANISOU 1427  C   CYS B  83     2245   1484   1837     22   -135      0       C  
ATOM   1428  O   CYS B  83     -16.971  10.597  20.313  1.00 14.95           O  
ANISOU 1428  O   CYS B  83     2293   1577   1809     58   -115    -63       O  
ATOM   1429  CB  CYS B  83     -19.377  11.331  21.917  1.00 11.31           C  
ANISOU 1429  CB  CYS B  83     2028    964   1305    -16   -122    -84       C  
ATOM   1430  SG  CYS B  83     -21.143  11.649  22.049  1.00 16.07           S  
ANISOU 1430  SG  CYS B  83     2682   1569   1856    -55    -69    -86       S  
ATOM   1431  N  ATHR B  84     -16.284  12.584  21.089  0.37 12.88           N  
ANISOU 1431  N  ATHR B  84     1951   1198   1746     21   -194     56       N  
ATOM   1432  N  BTHR B  84     -16.293  12.586  21.114  0.63 12.65           N  
ANISOU 1432  N  BTHR B  84     1924   1165   1716     21   -195     55       N  
ATOM   1433  CA ATHR B  84     -14.880  12.237  20.916  0.37 13.21           C  
ANISOU 1433  CA ATHR B  84     1914   1251   1854     56   -217     62       C  
ATOM   1434  CA BTHR B  84     -14.878  12.299  20.901  0.63 13.40           C  
ANISOU 1434  CA BTHR B  84     1932   1275   1882     54   -217     67       C  
ATOM   1435  C  ATHR B  84     -14.068  12.463  22.179  0.37 13.54           C  
ANISOU 1435  C  ATHR B  84     2002   1128   2013     70   -338     19       C  
ATOM   1436  C  BTHR B  84     -14.060  12.476  22.177  0.63 13.51           C  
ANISOU 1436  C  BTHR B  84     1997   1124   2011     70   -339     20       C  
ATOM   1437  O  ATHR B  84     -14.282  13.430  22.905  0.37 14.37           O  
ANISOU 1437  O  ATHR B  84     2124   1131   2204     56   -410     30       O  
ATOM   1438  O  BTHR B  84     -14.263  13.434  22.916  0.63 14.64           O  
ANISOU 1438  O  BTHR B  84     2159   1164   2241     56   -412     30       O  
ATOM   1439  CB ATHR B  84     -14.238  13.072  19.793  0.37 15.62           C  
ANISOU 1439  CB ATHR B  84     2023   1672   2241     47   -164    209       C  
ATOM   1440  CB BTHR B  84     -14.301  13.257  19.832  0.63 16.17           C  
ANISOU 1440  CB BTHR B  84     2088   1731   2326     40   -169    222       C  
ATOM   1441  OG1ATHR B  84     -14.170  14.442  20.205  0.37 14.56           O  
ANISOU 1441  OG1ATHR B  84     1824   1431   2275      5   -230    303       O  
ATOM   1442  OG1BTHR B  84     -15.121  13.225  18.649  0.63 17.32           O  
ANISOU 1442  OG1BTHR B  84     2192   2045   2345     37    -66    274       O  
ATOM   1443  CG2ATHR B  84     -15.057  12.969  18.510  0.37 17.07           C  
ANISOU 1443  CG2ATHR B  84     2159   2040   2285     49    -54    259       C  
ATOM   1444  CG2BTHR B  84     -12.874  12.890  19.493  0.63 13.71           C  
ANISOU 1444  CG2BTHR B  84     1662   1466   2081     80   -165    243       C  
ATOM   1445  N   ASN B  85     -13.133  11.558  22.434  1.00 12.62           N  
ANISOU 1445  N   ASN B  85     1905    986   1906    111   -376    -46       N  
ATOM   1446  CA  ASN B  85     -12.074  11.806  23.401  1.00 16.36           C  
ANISOU 1446  CA  ASN B  85     2382   1319   2514    137   -501    -76       C  
ATOM   1447  C   ASN B  85     -10.774  11.283  22.773  1.00 17.92           C  
ANISOU 1447  C   ASN B  85     2456   1569   2786    169   -490    -67       C  
ATOM   1448  O   ASN B  85     -10.785  10.844  21.625  1.00 16.79           O  
ANISOU 1448  O   ASN B  85     2226   1583   2569    179   -382    -39       O  
ATOM   1449  CB  ASN B  85     -12.384  11.246  24.805  1.00 16.64           C  
ANISOU 1449  CB  ASN B  85     2611   1233   2477    166   -592   -183       C  
ATOM   1450  CG  ASN B  85     -12.238   9.731  24.897  1.00 14.25           C  
ANISOU 1450  CG  ASN B  85     2398    940   2079    194   -585   -255       C  
ATOM   1451  OD1 ASN B  85     -11.796   9.079  23.956  1.00 14.71           O  
ANISOU 1451  OD1 ASN B  85     2370   1082   2136    205   -532   -261       O  
ATOM   1452  ND2 ASN B  85     -12.605   9.169  26.055  1.00 12.62           N  
ANISOU 1452  ND2 ASN B  85     2356    648   1793    213   -647   -310       N  
ATOM   1453  N   TYR B  86      -9.658  11.331  23.485  1.00 16.47           N  
ANISOU 1453  N   TYR B  86     2252   1265   2742    198   -604   -100       N  
ATOM   1454  CA  TYR B  86      -8.392  10.999  22.834  1.00 16.16           C  
ANISOU 1454  CA  TYR B  86     2058   1280   2801    228   -586    -78       C  
ATOM   1455  C   TYR B  86      -8.295   9.528  22.435  1.00 19.48           C  
ANISOU 1455  C   TYR B  86     2526   1785   3091    276   -541   -180       C  
ATOM   1456  O   TYR B  86      -7.488   9.179  21.573  1.00 21.85           O  
ANISOU 1456  O   TYR B  86     2683   2200   3421    313   -483   -171       O  
ATOM   1457  CB  TYR B  86      -7.195  11.415  23.688  1.00 15.92           C  
ANISOU 1457  CB  TYR B  86     1981   1084   2984    249   -735    -96       C  
ATOM   1458  CG  TYR B  86      -6.844  10.469  24.819  1.00 17.87           C  
ANISOU 1458  CG  TYR B  86     2391   1201   3199    300   -862   -239       C  
ATOM   1459  CD1 TYR B  86      -5.854   9.499  24.660  1.00 21.30           C  
ANISOU 1459  CD1 TYR B  86     2782   1639   3671    346   -884   -303       C  
ATOM   1460  CD2 TYR B  86      -7.466  10.570  26.057  1.00 17.24           C  
ANISOU 1460  CD2 TYR B  86     2498   1002   3051    312   -966   -306       C  
ATOM   1461  CE1 TYR B  86      -5.509   8.633  25.700  1.00 21.94           C  
ANISOU 1461  CE1 TYR B  86     3010   1590   3735    392  -1016   -418       C  
ATOM   1462  CE2 TYR B  86      -7.134   9.715  27.100  1.00 18.09           C  
ANISOU 1462  CE2 TYR B  86     2753   1005   3114    364  -1083   -409       C  
ATOM   1463  CZ  TYR B  86      -6.154   8.751  26.918  1.00 23.71           C  
ANISOU 1463  CZ  TYR B  86     3426   1703   3880    399  -1114   -459       C  
ATOM   1464  OH  TYR B  86      -5.826   7.914  27.959  1.00 24.68           O  
ANISOU 1464  OH  TYR B  86     3695   1713   3969    449  -1244   -546       O  
ATOM   1465  N   LYS B  87      -9.115   8.674  23.054  1.00 17.08           N  
ANISOU 1465  N   LYS B  87     2407   1425   2656    280   -572   -274       N  
ATOM   1466  CA  LYS B  87      -9.089   7.233  22.770  1.00 20.66           C  
ANISOU 1466  CA  LYS B  87     2908   1916   3026    324   -567   -379       C  
ATOM   1467  C   LYS B  87      -9.956   6.840  21.560  1.00 19.99           C  
ANISOU 1467  C   LYS B  87     2785   2005   2806    329   -444   -385       C  
ATOM   1468  O   LYS B  87      -9.743   5.807  20.941  1.00 20.76           O  
ANISOU 1468  O   LYS B  87     2851   2174   2863    385   -435   -478       O  
ATOM   1469  CB  LYS B  87      -9.500   6.423  24.004  1.00 22.40           C  
ANISOU 1469  CB  LYS B  87     3326   1983   3200    325   -669   -451       C  
ATOM   1470  CG  LYS B  87      -8.642   6.705  25.229  1.00 27.87           C  
ANISOU 1470  CG  LYS B  87     4076   2518   3997    345   -810   -466       C  
ATOM   1471  CD  LYS B  87      -8.050   5.453  25.822  1.00 34.41           C  
ANISOU 1471  CD  LYS B  87     4985   3246   4843    390   -918   -554       C  
ATOM   1472  CE  LYS B  87      -7.097   4.778  24.853  1.00 37.85           C  
ANISOU 1472  CE  LYS B  87     5273   3751   5356    436   -901   -616       C  
ATOM   1473  NZ  LYS B  87      -6.384   3.648  25.506  1.00 37.04           N  
ANISOU 1473  NZ  LYS B  87     5238   3522   5314    484  -1037   -707       N  
ATOM   1474  N   GLY B  88     -10.930   7.667  21.212  1.00 13.06           N  
ANISOU 1474  N   GLY B  88     1905   1192   1867    280   -368   -301       N  
ATOM   1475  CA  GLY B  88     -11.703   7.379  20.023  1.00 15.22           C  
ANISOU 1475  CA  GLY B  88     2133   1634   2015    295   -267   -309       C  
ATOM   1476  C   GLY B  88     -12.953   8.215  19.943  1.00 18.83           C  
ANISOU 1476  C   GLY B  88     2630   2110   2414    234   -213   -229       C  
ATOM   1477  O   GLY B  88     -13.067   9.253  20.592  1.00 13.98           O  
ANISOU 1477  O   GLY B  88     2032   1410   1870    184   -238   -150       O  
ATOM   1478  N   GLU B  89     -13.900   7.732  19.151  1.00 18.05           N  
ANISOU 1478  N   GLU B  89     2544   2116   2199    247   -157   -268       N  
ATOM   1479  CA  GLU B  89     -15.081   8.488  18.802  1.00 15.94           C  
ANISOU 1479  CA  GLU B  89     2287   1897   1874    199    -98   -197       C  
ATOM   1480  C   GLU B  89     -16.261   7.520  18.803  1.00 15.80           C  
ANISOU 1480  C   GLU B  89     2374   1852   1779    198   -107   -295       C  
ATOM   1481  O   GLU B  89     -16.102   6.335  18.498  1.00 16.74           O  
ANISOU 1481  O   GLU B  89     2501   1985   1876    254   -140   -409       O  
ATOM   1482  CB  GLU B  89     -14.857   9.100  17.413  1.00 22.67           C  
ANISOU 1482  CB  GLU B  89     2979   2961   2674    230     -7   -107       C  
ATOM   1483  CG  GLU B  89     -16.010   9.888  16.819  1.00 24.04           C  
ANISOU 1483  CG  GLU B  89     3140   3210   2784    192     50    -24       C  
ATOM   1484  CD  GLU B  89     -16.919   9.019  15.955  1.00 27.88           C  
ANISOU 1484  CD  GLU B  89     3653   3807   3131    243     73   -128       C  
ATOM   1485  OE1 GLU B  89     -16.666   7.809  15.839  1.00 28.79           O  
ANISOU 1485  OE1 GLU B  89     3794   3931   3214    307     37   -270       O  
ATOM   1486  OE2 GLU B  89     -17.885   9.549  15.391  1.00 33.37           O  
ANISOU 1486  OE2 GLU B  89     4339   4571   3769    223    109    -77       O  
ATOM   1487  N   ALA B  90     -17.433   8.021  19.172  1.00 11.42           N  
ANISOU 1487  N   ALA B  90     1887   1245   1208    138    -90   -254       N  
ATOM   1488  CA  ALA B  90     -18.676   7.264  19.054  1.00 15.09           C  
ANISOU 1488  CA  ALA B  90     2420   1690   1625    128    -88   -320       C  
ATOM   1489  C   ALA B  90     -19.743   8.227  18.560  1.00 14.18           C  
ANISOU 1489  C   ALA B  90     2278   1639   1473     89    -29   -250       C  
ATOM   1490  O   ALA B  90     -19.736   9.417  18.929  1.00 10.89           O  
ANISOU 1490  O   ALA B  90     1846   1201   1093     47    -13   -155       O  
ATOM   1491  CB  ALA B  90     -19.075   6.669  20.393  1.00 16.33           C  
ANISOU 1491  CB  ALA B  90     2707   1675   1821     90   -136   -339       C  
ATOM   1492  N   SER B  91     -20.661   7.732  17.737  1.00 13.48           N  
ANISOU 1492  N   SER B  91     2176   1615   1330    107    -15   -306       N  
ATOM   1493  CA  SER B  91     -21.704   8.601  17.216  1.00 12.66           C  
ANISOU 1493  CA  SER B  91     2045   1571   1195     75     30   -246       C  
ATOM   1494  C   SER B  91     -23.049   7.904  17.107  1.00 14.77           C  
ANISOU 1494  C   SER B  91     2358   1792   1462     62     15   -320       C  
ATOM   1495  O   SER B  91     -23.131   6.676  17.060  1.00 13.55           O  
ANISOU 1495  O   SER B  91     2227   1593   1327     94    -34   -424       O  
ATOM   1496  CB  SER B  91     -21.282   9.241  15.882  1.00 10.39           C  
ANISOU 1496  CB  SER B  91     1635   1480    833    124     72   -185       C  
ATOM   1497  OG  SER B  91     -21.547   8.411  14.779  1.00 18.77           O  
ANISOU 1497  OG  SER B  91     2661   2670   1802    206     64   -287       O  
ATOM   1498  N   ASP B  92     -24.101   8.708  17.074  1.00 10.86           N  
ANISOU 1498  N   ASP B  92     1862   1292    972     14     46   -266       N  
ATOM   1499  CA  ASP B  92     -25.463   8.208  17.069  1.00 12.56           C  
ANISOU 1499  CA  ASP B  92     2107   1448   1217    -11     37   -318       C  
ATOM   1500  C   ASP B  92     -26.333   9.225  16.351  1.00 12.25           C  
ANISOU 1500  C   ASP B  92     2017   1484   1153    -26     65   -268       C  
ATOM   1501  O   ASP B  92     -26.225  10.417  16.626  1.00 11.68           O  
ANISOU 1501  O   ASP B  92     1928   1416   1092    -62     93   -172       O  
ATOM   1502  CB  ASP B  92     -25.948   8.018  18.511  1.00 12.87           C  
ANISOU 1502  CB  ASP B  92     2233   1331   1327    -76     48   -293       C  
ATOM   1503  CG  ASP B  92     -27.397   7.560  18.592  1.00 14.62           C  
ANISOU 1503  CG  ASP B  92     2463   1485   1607   -113     54   -317       C  
ATOM   1504  OD1 ASP B  92     -27.811   6.711  17.773  1.00 13.93           O  
ANISOU 1504  OD1 ASP B  92     2340   1406   1548    -82      7   -400       O  
ATOM   1505  OD2 ASP B  92     -28.126   8.061  19.473  1.00 18.07           O  
ANISOU 1505  OD2 ASP B  92     2933   1863   2070   -165    101   -261       O  
ATOM   1506  N   TYR B  93     -27.160   8.769  15.410  1.00 10.61           N  
ANISOU 1506  N   TYR B  93     1777   1328    925      8     37   -340       N  
ATOM   1507  CA  TYR B  93     -28.086   9.667  14.722  1.00  9.64           C  
ANISOU 1507  CA  TYR B  93     1610   1269    784     -4     48   -296       C  
ATOM   1508  C   TYR B  93     -29.503   9.129  14.919  1.00 14.85           C  
ANISOU 1508  C   TYR B  93     2290   1821   1533    -37     23   -366       C  
ATOM   1509  O   TYR B  93     -29.703   7.938  15.165  1.00 18.62           O  
ANISOU 1509  O   TYR B  93     2790   2212   2072    -29    -17   -453       O  
ATOM   1510  CB  TYR B  93     -27.760   9.787  13.218  1.00 10.57           C  
ANISOU 1510  CB  TYR B  93     1653   1587    777     87     31   -305       C  
ATOM   1511  CG  TYR B  93     -28.249   8.605  12.396  1.00 10.65           C  
ANISOU 1511  CG  TYR B  93     1653   1635    758    171    -42   -467       C  
ATOM   1512  CD1 TYR B  93     -29.525   8.595  11.838  1.00 11.51           C  
ANISOU 1512  CD1 TYR B  93     1747   1735    891    178    -89   -521       C  
ATOM   1513  CD2 TYR B  93     -27.443   7.495  12.203  1.00  9.88           C  
ANISOU 1513  CD2 TYR B  93     1555   1568    632    249    -85   -581       C  
ATOM   1514  CE1 TYR B  93     -29.978   7.508  11.105  1.00 12.05           C  
ANISOU 1514  CE1 TYR B  93     1799   1818    962    264   -186   -690       C  
ATOM   1515  CE2 TYR B  93     -27.885   6.394  11.466  1.00 10.87           C  
ANISOU 1515  CE2 TYR B  93     1662   1711    759    341   -183   -758       C  
ATOM   1516  CZ  TYR B  93     -29.149   6.404  10.929  1.00 11.25           C  
ANISOU 1516  CZ  TYR B  93     1694   1742    838    348   -238   -814       C  
ATOM   1517  OH  TYR B  93     -29.585   5.312  10.217  1.00 13.30           O  
ANISOU 1517  OH  TYR B  93     1927   1999   1126    448   -363  -1007       O  
ATOM   1518  N   ALA B  94     -30.479  10.016  14.850  1.00 14.40           N  
ANISOU 1518  N   ALA B  94     2212   1753   1506    -78     40   -319       N  
ATOM   1519  CA  ALA B  94     -31.866   9.606  14.758  1.00 15.99           C  
ANISOU 1519  CA  ALA B  94     2401   1877   1796   -100     13   -382       C  
ATOM   1520  C   ALA B  94     -32.536  10.543  13.765  1.00 17.20           C  
ANISOU 1520  C   ALA B  94     2499   2121   1915    -82     -8   -357       C  
ATOM   1521  O   ALA B  94     -31.931  11.519  13.299  1.00 13.56           O  
ANISOU 1521  O   ALA B  94     2011   1769   1372    -66      7   -266       O  
ATOM   1522  CB  ALA B  94     -32.542   9.647  16.123  1.00 13.38           C  
ANISOU 1522  CB  ALA B  94     2107   1403   1572   -181     69   -344       C  
ATOM   1523  N   THR B  95     -33.779  10.243  13.421  1.00 13.80           N  
ANISOU 1523  N   THR B  95     2042   1639   1564    -86    -52   -425       N  
ATOM   1524  CA  THR B  95     -34.447  10.970  12.366  1.00 13.67           C  
ANISOU 1524  CA  THR B  95     1974   1708   1511    -55    -97   -418       C  
ATOM   1525  C   THR B  95     -35.653  11.717  12.937  1.00 16.51           C  
ANISOU 1525  C   THR B  95     2315   1961   1999   -132    -74   -384       C  
ATOM   1526  O   THR B  95     -36.393  11.183  13.780  1.00 16.59           O  
ANISOU 1526  O   THR B  95     2331   1837   2137   -184    -48   -421       O  
ATOM   1527  CB  THR B  95     -34.863  10.007  11.229  1.00 17.34           C  
ANISOU 1527  CB  THR B  95     2411   2227   1952     38   -203   -560       C  
ATOM   1528  OG1 THR B  95     -33.691   9.365  10.700  1.00 20.89           O  
ANISOU 1528  OG1 THR B  95     2870   2799   2270    129   -223   -608       O  
ATOM   1529  CG2 THR B  95     -35.545  10.760  10.111  1.00 21.39           C  
ANISOU 1529  CG2 THR B  95     2878   2844   2405     85   -260   -550       C  
ATOM   1530  N   LEU B  96     -35.829  12.960  12.502  1.00 15.46           N  
ANISOU 1530  N   LEU B  96     2148   1887   1838   -137    -80   -301       N  
ATOM   1531  CA  LEU B  96     -36.999  13.745  12.878  1.00 15.39           C  
ANISOU 1531  CA  LEU B  96     2106   1787   1952   -193    -77   -287       C  
ATOM   1532  C   LEU B  96     -37.892  13.885  11.655  1.00 16.60           C  
ANISOU 1532  C   LEU B  96     2209   1991   2107   -149   -169   -327       C  
ATOM   1533  O   LEU B  96     -37.426  14.229  10.569  1.00 16.73           O  
ANISOU 1533  O   LEU B  96     2211   2151   1996    -85   -217   -281       O  
ATOM   1534  CB  LEU B  96     -36.595  15.136  13.382  1.00 15.63           C  
ANISOU 1534  CB  LEU B  96     2128   1816   1995   -231    -46   -173       C  
ATOM   1535  CG  LEU B  96     -37.731  16.002  13.932  1.00 14.13           C  
ANISOU 1535  CG  LEU B  96     1899   1528   1943   -278    -45   -178       C  
ATOM   1536  CD1 LEU B  96     -38.359  15.345  15.147  1.00 15.19           C  
ANISOU 1536  CD1 LEU B  96     2054   1557   2162   -315     28   -250       C  
ATOM   1537  CD2 LEU B  96     -37.235  17.410  14.270  1.00 13.29           C  
ANISOU 1537  CD2 LEU B  96     1769   1413   1867   -298    -56    -82       C  
ATOM   1538  N   ASP B  97     -39.171  13.586  11.831  1.00 17.31           N  
ANISOU 1538  N   ASP B  97     2267   1971   2340   -176   -194   -407       N  
ATOM   1539  CA  ASP B  97     -40.152  13.787  10.780  1.00 19.34           C  
ANISOU 1539  CA  ASP B  97     2473   2248   2628   -136   -296   -456       C  
ATOM   1540  C   ASP B  97     -41.154  14.823  11.275  1.00 18.13           C  
ANISOU 1540  C   ASP B  97     2272   2001   2615   -200   -282   -421       C  
ATOM   1541  O   ASP B  97     -41.971  14.543  12.161  1.00 19.37           O  
ANISOU 1541  O   ASP B  97     2403   2033   2923   -255   -232   -467       O  
ATOM   1542  CB  ASP B  97     -40.844  12.457  10.447  1.00 24.48           C  
ANISOU 1542  CB  ASP B  97     3104   2832   3366   -101   -370   -605       C  
ATOM   1543  CG  ASP B  97     -42.014  12.622   9.492  1.00 31.48           C  
ANISOU 1543  CG  ASP B  97     3931   3707   4322    -60   -492   -680       C  
ATOM   1544  OD1 ASP B  97     -42.083  13.654   8.787  1.00 31.72           O  
ANISOU 1544  OD1 ASP B  97     3951   3832   4269    -32   -534   -613       O  
ATOM   1545  OD2 ASP B  97     -42.870  11.708   9.448  1.00 33.30           O  
ANISOU 1545  OD2 ASP B  97     4120   3825   4709    -55   -558   -800       O  
ATOM   1546  N   VAL B  98     -41.071  16.037  10.737  1.00 18.63           N  
ANISOU 1546  N   VAL B  98     2313   2129   2637   -192   -322   -328       N  
ATOM   1547  CA  VAL B  98     -42.013  17.079  11.124  1.00 19.65           C  
ANISOU 1547  CA  VAL B  98     2388   2166   2914   -240   -333   -310       C  
ATOM   1548  C   VAL B  98     -43.241  16.970  10.222  1.00 23.83           C  
ANISOU 1548  C   VAL B  98     2863   2671   3521   -209   -442   -387       C  
ATOM   1549  O   VAL B  98     -43.149  17.193   9.012  1.00 24.13           O  
ANISOU 1549  O   VAL B  98     2897   2816   3455   -145   -540   -356       O  
ATOM   1550  CB  VAL B  98     -41.408  18.485  11.014  1.00 18.45           C  
ANISOU 1550  CB  VAL B  98     2220   2055   2735   -251   -353   -169       C  
ATOM   1551  CG1 VAL B  98     -42.393  19.510  11.534  1.00 15.96           C  
ANISOU 1551  CG1 VAL B  98     1842   1623   2600   -294   -378   -182       C  
ATOM   1552  CG2 VAL B  98     -40.093  18.565  11.797  1.00 13.92           C  
ANISOU 1552  CG2 VAL B  98     1692   1503   2093   -270   -270   -100       C  
ATOM   1553  N   THR B  99     -44.378  16.607  10.814  1.00 23.25           N  
ANISOU 1553  N   THR B  99     2741   2465   3625   -248   -425   -482       N  
ATOM   1554  CA  THR B  99     -45.596  16.357  10.048  1.00 26.60           C  
ANISOU 1554  CA  THR B  99     3104   2839   4164   -221   -536   -576       C  
ATOM   1555  C   THR B  99     -46.487  17.596   9.947  1.00 33.30           C  
ANISOU 1555  C   THR B  99     3885   3634   5132   -242   -591   -552       C  
ATOM   1556  O   THR B  99     -46.462  18.467  10.816  1.00 29.32           O  
ANISOU 1556  O   THR B  99     3363   3086   4690   -290   -522   -503       O  
ATOM   1557  CB  THR B  99     -46.413  15.193  10.652  1.00 21.41           C  
ANISOU 1557  CB  THR B  99     2403   2053   3680   -253   -500   -683       C  
ATOM   1558  OG1 THR B  99     -46.792  15.509  11.995  1.00 21.66           O  
ANISOU 1558  OG1 THR B  99     2400   2001   3830   -328   -366   -655       O  
ATOM   1559  CG2 THR B  99     -45.595  13.905  10.660  1.00 23.81           C  
ANISOU 1559  CG2 THR B  99     2761   2385   3899   -228   -482   -717       C  
ATOM   1560  N   GLY B 100     -47.287  17.659   8.886  1.00 32.50           N  
ATOM   1561  CA  GLY B 100     -48.186  18.781   8.672  1.00 38.61           C  
ATOM   1562  C   GLY B 100     -47.500  19.971   8.024  1.00 45.29           C  
ATOM   1563  O   GLY B 100     -47.888  21.123   8.235  1.00 48.85           O  
TER    1564      GLY B 100                                                      
ATOM   1565  N   THR C   4     -17.178  21.920 -12.405  1.00 61.84           N  
ANISOU 1565  N   THR C   4    10062   7033   6400  -1199   -535   2113       N  
ATOM   1566  CA  THR C   4     -16.049  21.557 -11.554  1.00 60.36           C  
ANISOU 1566  CA  THR C   4     9567   7043   6325  -1031   -138   2015       C  
ATOM   1567  C   THR C   4     -15.758  20.063 -11.630  1.00 59.06           C  
ANISOU 1567  C   THR C   4     9613   6893   5933   -929     77   1916       C  
ATOM   1568  O   THR C   4     -16.602  19.283 -12.070  1.00 59.07           O  
ANISOU 1568  O   THR C   4     9927   6779   5739   -977   -126   1888       O  
ATOM   1569  CB  THR C   4     -16.308  21.941 -10.083  1.00 58.77           C  
ANISOU 1569  CB  THR C   4     8805   6978   6548   -965   -241   1934       C  
ATOM   1570  N   LEU C   5     -14.558  19.669 -11.213  1.00 56.96           N  
ANISOU 1570  N   LEU C   5     9172   6755   5717   -794    482   1877       N  
ATOM   1571  CA  LEU C   5     -14.232  18.253 -11.082  1.00 54.91           C  
ANISOU 1571  CA  LEU C   5     9012   6517   5333   -675    711   1783       C  
ATOM   1572  C   LEU C   5     -14.796  17.739  -9.763  1.00 48.61           C  
ANISOU 1572  C   LEU C   5     7830   5844   4797   -591    522   1669       C  
ATOM   1573  O   LEU C   5     -15.582  16.798  -9.741  1.00 46.44           O  
ANISOU 1573  O   LEU C   5     7710   5519   4417   -578    367   1590       O  
ATOM   1574  CB  LEU C   5     -12.722  18.032 -11.126  1.00 57.03           C  
ANISOU 1574  CB  LEU C   5     9196   6842   5630   -565   1217   1815       C  
ATOM   1575  N   ASP C   6     -14.395  18.377  -8.667  1.00 45.64           N  
ANISOU 1575  N   ASP C   6     6976   5617   4750   -552    536   1664       N  
ATOM   1576  CA  ASP C   6     -14.906  18.037  -7.341  1.00 40.42           C  
ANISOU 1576  CA  ASP C   6     5965   5061   4332   -503    369   1557       C  
ATOM   1577  C   ASP C   6     -16.432  18.002  -7.308  1.00 37.95           C  
ANISOU 1577  C   ASP C   6     5740   4641   4036   -576    -21   1505       C  
ATOM   1578  O   ASP C   6     -17.101  18.898  -7.835  1.00 33.98           O  
ANISOU 1578  O   ASP C   6     5332   4025   3554   -692   -249   1576       O  
ATOM   1579  CB  ASP C   6     -14.404  19.039  -6.303  1.00 38.07           C  
ANISOU 1579  CB  ASP C   6     5227   4891   4348   -521    381   1576       C  
ATOM   1580  CG  ASP C   6     -12.928  18.887  -6.014  1.00 37.22           C  
ANISOU 1580  CG  ASP C   6     4928   4895   4317   -441    720   1633       C  
ATOM   1581  OD1 ASP C   6     -12.244  18.140  -6.744  1.00 40.90           O  
ANISOU 1581  OD1 ASP C   6     5602   5321   4616   -365    994   1671       O  
ATOM   1582  OD2 ASP C   6     -12.453  19.517  -5.055  1.00 34.19           O  
ANISOU 1582  OD2 ASP C   6     4190   4619   4179   -465    715   1649       O  
ATOM   1583  N   HIS C   7     -16.978  16.968  -6.677  1.00 34.38           N  
ANISOU 1583  N   HIS C   7     5238   4213   3612   -511   -100   1394       N  
ATOM   1584  CA  HIS C   7     -18.422  16.839  -6.551  1.00 33.17           C  
ANISOU 1584  CA  HIS C   7     5124   3944   3535   -568   -452   1348       C  
ATOM   1585  C   HIS C   7     -18.750  16.080  -5.270  1.00 30.45           C  
ANISOU 1585  C   HIS C   7     4510   3688   3371   -487   -472   1214       C  
ATOM   1586  O   HIS C   7     -17.888  15.407  -4.707  1.00 26.93           O  
ANISOU 1586  O   HIS C   7     3946   3379   2908   -389   -238   1166       O  
ATOM   1587  CB  HIS C   7     -19.022  16.143  -7.782  1.00 37.63           C  
ANISOU 1587  CB  HIS C   7     6165   4344   3788   -616   -586   1385       C  
ATOM   1588  CG  HIS C   7     -18.603  14.710  -7.942  1.00 42.05           C  
ANISOU 1588  CG  HIS C   7     6932   4935   4110   -513   -376   1309       C  
ATOM   1589  ND1 HIS C   7     -17.563  14.323  -8.763  1.00 45.27           N  
ANISOU 1589  ND1 HIS C   7     7620   5337   4245   -480    -43   1345       N  
ATOM   1590  CD2 HIS C   7     -19.087  13.571  -7.390  1.00 39.65           C  
ANISOU 1590  CD2 HIS C   7     6596   4649   3819   -435   -428   1200       C  
ATOM   1591  CE1 HIS C   7     -17.424  13.011  -8.705  1.00 43.96           C  
ANISOU 1591  CE1 HIS C   7     7578   5179   3946   -385    107   1262       C  
ATOM   1592  NE2 HIS C   7     -18.337  12.528  -7.881  1.00 41.34           N  
ANISOU 1592  NE2 HIS C   7     7062   4873   3774   -356   -138   1174       N  
ATOM   1593  N   ALA C   8     -19.983  16.215  -4.798  1.00 30.16           N  
ANISOU 1593  N   ALA C   8     4369   3557   3535   -535   -745   1167       N  
ATOM   1594  CA  ALA C   8     -20.415  15.498  -3.605  1.00 25.94           C  
ANISOU 1594  CA  ALA C   8     3619   3076   3162   -475   -764   1034       C  
ATOM   1595  C   ALA C   8     -20.464  14.004  -3.902  1.00 24.32           C  
ANISOU 1595  C   ALA C   8     3638   2876   2727   -383   -725    978       C  
ATOM   1596  O   ALA C   8     -20.655  13.599  -5.049  1.00 24.72           O  
ANISOU 1596  O   ALA C   8     4040   2822   2530   -402   -786   1033       O  
ATOM   1597  CB  ALA C   8     -21.781  15.993  -3.153  1.00 27.18           C  
ANISOU 1597  CB  ALA C   8     3634   3079   3615   -549  -1029   1006       C  
ATOM   1598  N   PRO C   9     -20.303  13.172  -2.868  1.00 19.79           N  
ANISOU 1598  N   PRO C   9     2887   2411   2221   -299   -627    870       N  
ATOM   1599  CA  PRO C   9     -20.297  11.734  -3.144  1.00 21.11           C  
ANISOU 1599  CA  PRO C   9     3257   2582   2181   -205   -568    818       C  
ATOM   1600  C   PRO C   9     -21.572  11.313  -3.851  1.00 24.65           C  
ANISOU 1600  C   PRO C   9     3965   2845   2557   -250   -846    817       C  
ATOM   1601  O   PRO C   9     -22.657  11.843  -3.573  1.00 25.59           O  
ANISOU 1601  O   PRO C   9     3969   2847   2905   -322  -1098    816       O  
ATOM   1602  CB  PRO C   9     -20.200  11.110  -1.748  1.00 19.69           C  
ANISOU 1602  CB  PRO C   9     2798   2523   2162   -140   -501    709       C  
ATOM   1603  CG  PRO C   9     -19.530  12.175  -0.921  1.00 20.91           C  
ANISOU 1603  CG  PRO C   9     2657   2782   2505   -195   -413    733       C  
ATOM   1604  CD  PRO C   9     -20.086  13.467  -1.441  1.00 18.13           C  
ANISOU 1604  CD  PRO C   9     2326   2312   2249   -303   -563    796       C  
ATOM   1605  N   ARG C  10     -21.434  10.390  -4.795  1.00 23.57           N  
ANISOU 1605  N   ARG C  10     4184   2655   2116   -221   -796    829       N  
ATOM   1606  CA  ARG C  10     -22.577   9.883  -5.528  1.00 23.04           C  
ANISOU 1606  CA  ARG C  10     4413   2402   1940   -285  -1083    842       C  
ATOM   1607  C   ARG C  10     -22.566   8.378  -5.397  1.00 27.48           C  
ANISOU 1607  C   ARG C  10     5106   2989   2346   -183   -987    743       C  
ATOM   1608  O   ARG C  10     -21.612   7.729  -5.808  1.00 29.06           O  
ANISOU 1608  O   ARG C  10     5488   3246   2309   -115   -699    732       O  
ATOM   1609  CB  ARG C  10     -22.496  10.288  -7.006  1.00 29.14           C  
ANISOU 1609  CB  ARG C  10     5609   3036   2426   -403  -1152    967       C  
ATOM   1610  N   ILE C  11     -23.615   7.825  -4.803  1.00 28.17           N  
ANISOU 1610  N   ILE C  11     5087   3020   2598   -170  -1202    673       N  
ATOM   1611  CA  ILE C  11     -23.742   6.376  -4.708  1.00 27.93           C  
ANISOU 1611  CA  ILE C  11     5192   2994   2426    -81  -1148    581       C  
ATOM   1612  C   ILE C  11     -24.332   5.802  -5.995  1.00 30.46           C  
ANISOU 1612  C   ILE C  11     5998   3123   2451   -169  -1335    629       C  
ATOM   1613  O   ILE C  11     -25.518   5.986  -6.305  1.00 31.45           O  
ANISOU 1613  O   ILE C  11     6202   3074   2671   -276  -1706    684       O  
ATOM   1614  CB  ILE C  11     -24.561   5.968  -3.492  1.00 23.92           C  
ANISOU 1614  CB  ILE C  11     4375   2504   2211    -30  -1270    481       C  
ATOM   1615  CG1 ILE C  11     -23.905   6.546  -2.231  1.00 23.87           C  
ANISOU 1615  CG1 ILE C  11     3962   2672   2437     16  -1080    434       C  
ATOM   1616  CG2 ILE C  11     -24.657   4.443  -3.402  1.00 20.93           C  
ANISOU 1616  CG2 ILE C  11     4135   2135   1683     66  -1209    389       C  
ATOM   1617  CD1 ILE C  11     -24.622   6.231  -0.950  1.00 21.58           C  
ANISOU 1617  CD1 ILE C  11     3394   2391   2415     44  -1148    328       C  
ATOM   1618  N   THR C  12     -23.478   5.112  -6.744  1.00 28.89           N  
ANISOU 1618  N   THR C  12     6133   2934   1908   -136  -1069    620       N  
ATOM   1619  CA  THR C  12     -23.821   4.638  -8.079  1.00 31.69           C  
ANISOU 1619  CA  THR C  12     7048   3095   1897   -254  -1186    667       C  
ATOM   1620  C   THR C  12     -24.338   3.203  -8.072  1.00 31.61           C  
ANISOU 1620  C   THR C  12     7229   3020   1761   -210  -1234    574       C  
ATOM   1621  O   THR C  12     -24.944   2.743  -9.038  1.00 34.76           O  
ANISOU 1621  O   THR C  12     8085   3230   1892   -337  -1440    608       O  
ATOM   1622  CB  THR C  12     -22.611   4.752  -9.009  1.00 34.97           C  
ANISOU 1622  CB  THR C  12     7792   3507   1987   -270   -819    706       C  
ATOM   1623  OG1 THR C  12     -21.515   4.024  -8.445  1.00 33.91           O  
ANISOU 1623  OG1 THR C  12     7486   3521   1875    -93   -378    622       O  
ATOM   1624  CG2 THR C  12     -22.207   6.219  -9.166  1.00 36.61           C  
ANISOU 1624  CG2 THR C  12     7861   3750   2299   -340   -819    815       C  
ATOM   1625  N   LEU C  13     -24.085   2.479  -6.990  1.00 27.45           N  
ANISOU 1625  N   LEU C  13     6375   2642   1412    -44  -1056    463       N  
ATOM   1626  CA  LEU C  13     -24.630   1.154  -6.773  1.00 25.87           C  
ANISOU 1626  CA  LEU C  13     6267   2400   1163     16  -1112    368       C  
ATOM   1627  C   LEU C  13     -25.099   1.074  -5.308  1.00 25.95           C  
ANISOU 1627  C   LEU C  13     5763   2530   1566    119  -1198    294       C  
ATOM   1628  O   LEU C  13     -24.345   1.284  -4.424  1.00 24.58           O  
ANISOU 1628  O   LEU C  13     5252   2531   1556    217   -969    261       O  
ATOM   1629  CB  LEU C  13     -23.585   0.087  -7.067  1.00 30.31           C  
ANISOU 1629  CB  LEU C  13     7045   3001   1468    122   -688    301       C  
ATOM   1630  CG  LEU C  13     -23.960  -1.402  -6.992  1.00 35.90           C  
ANISOU 1630  CG  LEU C  13     7916   3655   2067    188   -670    199       C  
ATOM   1631  CD1 LEU C  13     -23.711  -2.021  -5.713  1.00 29.88           C  
ANISOU 1631  CD1 LEU C  13     6723   3062   1567    360   -530    114       C  
ATOM   1632  CD2 LEU C  13     -25.386  -1.719  -7.404  1.00 42.35           C  
ANISOU 1632  CD2 LEU C  13     8976   4288   2827     59  -1126    208       C  
ATOM   1633  N   ARG C  14     -26.359   0.814  -5.091  1.00 23.65           N  
ANISOU 1633  N   ARG C  14     5435   2122   1427     74  -1536    280       N  
ATOM   1634  CA  ARG C  14     -26.903   0.871  -3.739  1.00 25.56           C  
ANISOU 1634  CA  ARG C  14     5224   2436   2052    144  -1606    212       C  
ATOM   1635  C   ARG C  14     -26.984  -0.494  -3.054  1.00 25.53           C  
ANISOU 1635  C   ARG C  14     5159   2491   2049    269  -1504     90       C  
ATOM   1636  O   ARG C  14     -26.996  -1.536  -3.715  1.00 25.42           O  
ANISOU 1636  O   ARG C  14     5473   2409   1776    284  -1481     64       O  
ATOM   1637  CB  ARG C  14     -28.274   1.543  -3.754  1.00 28.65           C  
ANISOU 1637  CB  ARG C  14     5520   2640   2725     27  -2009    282       C  
ATOM   1638  CG  ARG C  14     -28.270   2.865  -4.494  1.00 35.43           C  
ANISOU 1638  CG  ARG C  14     6449   3416   3595   -107  -2147    421       C  
ATOM   1639  CD  ARG C  14     -29.548   3.657  -4.266  1.00 41.27           C  
ANISOU 1639  CD  ARG C  14     6967   3971   4743   -204  -2499    504       C  
ATOM   1640  NE  ARG C  14     -29.596   4.210  -2.916  1.00 41.97           N  
ANISOU 1640  NE  ARG C  14     6589   4149   5210   -135  -2357    427       N  
ATOM   1641  CZ  ARG C  14     -29.013   5.349  -2.553  1.00 41.78           C  
ANISOU 1641  CZ  ARG C  14     6356   4217   5301   -150  -2208    446       C  
ATOM   1642  NH1 ARG C  14     -28.338   6.064  -3.445  1.00 46.31           N  
ANISOU 1642  NH1 ARG C  14     7116   4814   5665   -217  -2182    546       N  
ATOM   1643  NH2 ARG C  14     -29.104   5.773  -1.298  1.00 35.16           N  
ANISOU 1643  NH2 ARG C  14     5149   3434   4775   -113  -2075    363       N  
ATOM   1644  N   MET C  15     -27.037  -0.464  -1.725  1.00 20.59           N  
ANISOU 1644  N   MET C  15     4138   1979   1706    343  -1436     17       N  
ATOM   1645  CA  MET C  15     -27.178  -1.658  -0.912  1.00 22.16           C  
ANISOU 1645  CA  MET C  15     4232   2236   1953    452  -1360    -92       C  
ATOM   1646  C   MET C  15     -28.506  -2.317  -1.177  1.00 18.79           C  
ANISOU 1646  C   MET C  15     3941   1619   1580    416  -1656   -110       C  
ATOM   1647  O   MET C  15     -29.464  -1.654  -1.550  1.00 20.61           O  
ANISOU 1647  O   MET C  15     4188   1679   1964    306  -1949    -36       O  
ATOM   1648  CB  MET C  15     -27.097  -1.308   0.580  1.00 22.93           C  
ANISOU 1648  CB  MET C  15     3914   2458   2341    488  -1270   -154       C  
ATOM   1649  CG  MET C  15     -25.736  -0.878   1.040  1.00 21.32           C  
ANISOU 1649  CG  MET C  15     3547   2451   2103    523   -995   -133       C  
ATOM   1650  SD  MET C  15     -25.696  -0.774   2.828  1.00 20.00           S  
ANISOU 1650  SD  MET C  15     2991   2405   2203    530   -922   -214       S  
ATOM   1651  CE  MET C  15     -26.491   0.800   3.109  1.00 15.79           C  
ANISOU 1651  CE  MET C  15     2300   1760   1938    394  -1078   -195       C  
ATOM   1652  N   ARG C  16     -28.561  -3.627  -0.955  1.00 20.48           N  
ANISOU 1652  N   ARG C  16     3419   1695   2669   -108  -1064    562       N  
ATOM   1653  CA  ARG C  16     -29.789  -4.385  -1.136  1.00 22.73           C  
ANISOU 1653  CA  ARG C  16     3664   1936   3037   -122  -1212    617       C  
ATOM   1654  C   ARG C  16     -30.321  -4.851   0.216  1.00 22.31           C  
ANISOU 1654  C   ARG C  16     3530   1847   3102   -169  -1188    625       C  
ATOM   1655  O   ARG C  16     -29.664  -5.639   0.910  1.00 21.91           O  
ANISOU 1655  O   ARG C  16     3499   1808   3018   -187  -1179    547       O  
ATOM   1656  CB  ARG C  16     -29.521  -5.588  -2.035  1.00 27.06           C  
ANISOU 1656  CB  ARG C  16     4299   2500   3482   -105  -1373    563       C  
ATOM   1657  CG  ARG C  16     -30.762  -6.184  -2.669  1.00 33.68           C  
ANISOU 1657  CG  ARG C  16     5119   3300   4378   -116  -1545    630       C  
ATOM   1658  CD  ARG C  16     -30.393  -7.330  -3.594  1.00 37.81           C  
ANISOU 1658  CD  ARG C  16     5748   3837   4783    -98  -1696    569       C  
ATOM   1659  NE  ARG C  16     -30.073  -8.543  -2.849  1.00 40.79           N  
ANISOU 1659  NE  ARG C  16     6141   4205   5152   -122  -1737    496       N  
ATOM   1660  CZ  ARG C  16     -30.982  -9.433  -2.459  1.00 46.90           C  
ANISOU 1660  CZ  ARG C  16     6874   4934   6010   -162  -1848    523       C  
ATOM   1661  NH1 ARG C  16     -32.265  -9.242  -2.747  1.00 48.36           N  
ANISOU 1661  NH1 ARG C  16     6996   5084   6293   -184  -1929    624       N  
ATOM   1662  NH2 ARG C  16     -30.612 -10.517  -1.785  1.00 49.58           N  
ANISOU 1662  NH2 ARG C  16     7235   5266   6336   -182  -1878    454       N  
ATOM   1663  N   SER C  17     -31.488  -4.347   0.610  1.00 19.67           N  
ANISOU 1663  N   SER C  17     3103   1468   2903   -186  -1171    721       N  
ATOM   1664  CA  SER C  17     -32.153  -4.871   1.796  1.00 18.81           C  
ANISOU 1664  CA  SER C  17     2914   1322   2912   -228  -1169    740       C  
ATOM   1665  C   SER C  17     -32.400  -6.346   1.580  1.00 22.39           C  
ANISOU 1665  C   SER C  17     3392   1767   3347   -246  -1341    708       C  
ATOM   1666  O   SER C  17     -32.770  -6.756   0.484  1.00 23.83           O  
ANISOU 1666  O   SER C  17     3614   1950   3490   -231  -1481    730       O  
ATOM   1667  CB  SER C  17     -33.481  -4.169   2.034  1.00 18.33           C  
ANISOU 1667  CB  SER C  17     2752   1217   2996   -235  -1147    861       C  
ATOM   1668  OG  SER C  17     -33.272  -2.797   2.276  1.00 19.25           O  
ANISOU 1668  OG  SER C  17     2850   1332   3131   -218   -982    891       O  
ATOM   1669  N   HIS C  18     -32.211  -7.150   2.618  1.00 18.48           N  
ANISOU 1669  N   HIS C  18     2878   1264   2881   -279  -1333    659       N  
ATOM   1670  CA  HIS C  18     -32.306  -8.587   2.429  1.00 21.16           C  
ANISOU 1670  CA  HIS C  18     3255   1594   3189   -295  -1490    618       C  
ATOM   1671  C   HIS C  18     -32.485  -9.345   3.736  1.00 21.62           C  
ANISOU 1671  C   HIS C  18     3259   1631   3326   -339  -1477    597       C  
ATOM   1672  O   HIS C  18     -32.326  -8.783   4.830  1.00 24.31           O  
ANISOU 1672  O   HIS C  18     3544   1969   3725   -356  -1334    597       O  
ATOM   1673  CB  HIS C  18     -31.091  -9.102   1.645  1.00 18.54           C  
ANISOU 1673  CB  HIS C  18     3045   1306   2694   -261  -1530    519       C  
ATOM   1674  CG  HIS C  18     -29.796  -9.044   2.403  1.00 17.71           C  
ANISOU 1674  CG  HIS C  18     2969   1239   2521   -258  -1399    429       C  
ATOM   1675  ND1 HIS C  18     -29.011  -7.912   2.454  1.00 16.67           N  
ANISOU 1675  ND1 HIS C  18     2847   1143   2344   -238  -1248    416       N  
ATOM   1676  CD2 HIS C  18     -29.126  -9.995   3.100  1.00 17.30           C  
ANISOU 1676  CD2 HIS C  18     2942   1198   2434   -272  -1402    349       C  
ATOM   1677  CE1 HIS C  18     -27.933  -8.156   3.178  1.00 15.86           C  
ANISOU 1677  CE1 HIS C  18     2768   1074   2185   -245  -1164    335       C  
ATOM   1678  NE2 HIS C  18     -27.974  -9.415   3.575  1.00 15.44           N  
ANISOU 1678  NE2 HIS C  18     2724   1007   2135   -263  -1254    294       N  
ATOM   1679  N   ARG C  19     -32.850 -10.615   3.607  1.00 20.07           N  
ANISOU 1679  N   ARG C  19     3082   1414   3130   -360  -1629    581       N  
ATOM   1680  CA  ARG C  19     -32.982 -11.525   4.733  1.00 22.10           C  
ANISOU 1680  CA  ARG C  19     3299   1650   3448   -401  -1641    555       C  
ATOM   1681  C   ARG C  19     -31.738 -12.389   4.805  1.00 21.11           C  
ANISOU 1681  C   ARG C  19     3267   1554   3201   -390  -1649    437       C  
ATOM   1682  O   ARG C  19     -31.042 -12.572   3.809  1.00 22.54           O  
ANISOU 1682  O   ARG C  19     3545   1761   3257   -352  -1698    387       O  
ATOM   1683  CB  ARG C  19     -34.185 -12.458   4.536  1.00 30.61           C  
ANISOU 1683  CB  ARG C  19     4344   2685   4603   -436  -1813    614       C  
ATOM   1684  CG  ARG C  19     -35.536 -11.787   4.534  1.00 37.13           C  
ANISOU 1684  CG  ARG C  19     5064   3481   5562   -451  -1822    742       C  
ATOM   1685  CD  ARG C  19     -36.653 -12.829   4.544  1.00 44.03           C  
ANISOU 1685  CD  ARG C  19     5897   4317   6515   -496  -1988    797       C  
ATOM   1686  NE  ARG C  19     -36.821 -13.469   3.244  1.00 50.02           N  
ANISOU 1686  NE  ARG C  19     6737   5073   7195   -491  -2164    794       N  
ATOM   1687  CZ  ARG C  19     -37.665 -13.041   2.309  1.00 58.49           C  
ANISOU 1687  CZ  ARG C  19     7789   6141   8294   -486  -2245    885       C  
ATOM   1688  NH1 ARG C  19     -38.422 -11.972   2.530  1.00 57.60           N  
ANISOU 1688  NH1 ARG C  19     7573   6024   8287   -481  -2162    987       N  
ATOM   1689  NH2 ARG C  19     -37.759 -13.683   1.151  1.00 63.49           N  
ANISOU 1689  NH2 ARG C  19     8507   6771   8845   -486  -2407    875       N  
ATOM   1690  N   VAL C  20     -31.461 -12.927   5.985  1.00 17.31           N  
ANISOU 1690  N   VAL C  20     2756   1069   2754   -420  -1600    396       N  
ATOM   1691  CA  VAL C  20     -30.381 -13.888   6.140  1.00 17.16           C  
ANISOU 1691  CA  VAL C  20     2815   1073   2631   -410  -1619    292       C  
ATOM   1692  C   VAL C  20     -30.781 -14.826   7.262  1.00 18.75           C  
ANISOU 1692  C   VAL C  20     2964   1244   2916   -457  -1650    287       C  
ATOM   1693  O   VAL C  20     -31.304 -14.376   8.276  1.00 21.48           O  
ANISOU 1693  O   VAL C  20     3215   1573   3373   -491  -1565    333       O  
ATOM   1694  CB  VAL C  20     -29.018 -13.210   6.447  1.00 18.52           C  
ANISOU 1694  CB  VAL C  20     3019   1302   2714   -385  -1460    226       C  
ATOM   1695  CG1 VAL C  20     -29.071 -12.417   7.745  1.00 15.15           C  
ANISOU 1695  CG1 VAL C  20     2504    875   2379   -419  -1302    249       C  
ATOM   1696  CG2 VAL C  20     -27.912 -14.253   6.507  1.00 17.82           C  
ANISOU 1696  CG2 VAL C  20     3013   1243   2516   -368  -1489    126       C  
ATOM   1697  N   PRO C  21     -30.579 -16.139   7.074  1.00 19.44           N  
ANISOU 1697  N   PRO C  21     3116   1320   2951   -459  -1773    233       N  
ATOM   1698  CA  PRO C  21     -31.003 -17.062   8.132  1.00 21.62           C  
ANISOU 1698  CA  PRO C  21     3343   1563   3309   -506  -1808    231       C  
ATOM   1699  C   PRO C  21     -30.117 -16.909   9.356  1.00 20.90           C  
ANISOU 1699  C   PRO C  21     3224   1502   3213   -516  -1659    177       C  
ATOM   1700  O   PRO C  21     -28.917 -16.634   9.195  1.00 19.85           O  
ANISOU 1700  O   PRO C  21     3151   1418   2972   -481  -1578    111       O  
ATOM   1701  CB  PRO C  21     -30.807 -18.447   7.497  1.00 24.64           C  
ANISOU 1701  CB  PRO C  21     3825   1929   3611   -497  -1968    176       C  
ATOM   1702  CG  PRO C  21     -30.763 -18.193   6.004  1.00 27.60           C  
ANISOU 1702  CG  PRO C  21     4282   2312   3895   -456  -2046    181       C  
ATOM   1703  CD  PRO C  21     -30.096 -16.847   5.877  1.00 23.46           C  
ANISOU 1703  CD  PRO C  21     3745   1836   3332   -421  -1892    181       C  
ATOM   1704  N   CYS C  22     -30.689 -17.068  10.551  1.00 18.64           N  
ANISOU 1704  N   CYS C  22     2849   1191   3042   -563  -1622    209       N  
ATOM   1705  CA  CYS C  22     -29.905 -16.953  11.779  1.00 18.20           C  
ANISOU 1705  CA  CYS C  22     2766   1162   2987   -579  -1485    161       C  
ATOM   1706  C   CYS C  22     -28.675 -17.827  11.692  1.00 18.20           C  
ANISOU 1706  C   CYS C  22     2857   1197   2862   -554  -1504     61       C  
ATOM   1707  O   CYS C  22     -28.757 -18.973  11.251  1.00 18.04           O  
ANISOU 1707  O   CYS C  22     2892   1154   2806   -548  -1641     34       O  
ATOM   1708  CB  CYS C  22     -30.719 -17.363  13.001  1.00 20.85           C  
ANISOU 1708  CB  CYS C  22     3009   1461   3452   -634  -1481    201       C  
ATOM   1709  SG  CYS C  22     -32.098 -16.269  13.381  1.00 30.18           S  
ANISOU 1709  SG  CYS C  22     4070   2606   4790   -660  -1421    322       S  
ATOM   1710  N   GLY C  23     -27.536 -17.282  12.116  1.00 19.91           N  
ANISOU 1710  N   GLY C  23     3087   1467   3011   -541  -1367     10       N  
ATOM   1711  CA  GLY C  23     -26.303 -18.042  12.149  1.00 19.69           C  
ANISOU 1711  CA  GLY C  23     3132   1480   2868   -515  -1366    -78       C  
ATOM   1712  C   GLY C  23     -25.395 -17.794  10.959  1.00 20.73           C  
ANISOU 1712  C   GLY C  23     3359   1657   2862   -454  -1371   -119       C  
ATOM   1713  O   GLY C  23     -24.168 -17.897  11.062  1.00 21.84           O  
ANISOU 1713  O   GLY C  23     3544   1852   2902   -428  -1306   -183       O  
ATOM   1714  N   GLN C  24     -25.993 -17.487   9.817  1.00 18.33           N  
ANISOU 1714  N   GLN C  24     3083   1331   2549   -431  -1450    -80       N  
ATOM   1715  CA  GLN C  24     -25.211 -17.280   8.610  1.00 18.36           C  
ANISOU 1715  CA  GLN C  24     3180   1374   2422   -372  -1464   -116       C  
ATOM   1716  C   GLN C  24     -24.467 -15.945   8.664  1.00 17.38           C  
ANISOU 1716  C   GLN C  24     3039   1306   2259   -360  -1306   -115       C  
ATOM   1717  O   GLN C  24     -24.831 -15.044   9.432  1.00 16.89           O  
ANISOU 1717  O   GLN C  24     2896   1238   2285   -397  -1201    -71       O  
ATOM   1718  CB  GLN C  24     -26.108 -17.362   7.369  1.00 21.39           C  
ANISOU 1718  CB  GLN C  24     3601   1718   2808   -355  -1601    -71       C  
ATOM   1719  CG  GLN C  24     -26.712 -18.743   7.127  1.00 22.08           C  
ANISOU 1719  CG  GLN C  24     3730   1753   2907   -365  -1771    -80       C  
ATOM   1720  CD  GLN C  24     -25.662 -19.786   6.830  1.00 23.14           C  
ANISOU 1720  CD  GLN C  24     3971   1908   2914   -323  -1814   -168       C  
ATOM   1721  OE1 GLN C  24     -24.772 -19.567   6.014  1.00 24.59           O  
ANISOU 1721  OE1 GLN C  24     4233   2134   2976   -267  -1790   -209       O  
ATOM   1722  NE2 GLN C  24     -25.756 -20.930   7.496  1.00 24.01           N  
ANISOU 1722  NE2 GLN C  24     4084   1988   3051   -346  -1874   -196       N  
ATOM   1723  N   ASN C  25     -23.408 -15.822   7.871  1.00 17.31           N  
ANISOU 1723  N   ASN C  25     3110   1350   2118   -308  -1285   -162       N  
ATOM   1724  CA  ASN C  25     -22.752 -14.526   7.699  1.00 15.70           C  
ANISOU 1724  CA  ASN C  25     2900   1197   1869   -295  -1151   -155       C  
ATOM   1725  C   ASN C  25     -23.503 -13.742   6.625  1.00 15.63           C  
ANISOU 1725  C   ASN C  25     2898   1164   1875   -277  -1192    -95       C  
ATOM   1726  O   ASN C  25     -24.216 -14.337   5.822  1.00 16.90           O  
ANISOU 1726  O   ASN C  25     3093   1286   2040   -262  -1331    -77       O  
ATOM   1727  CB  ASN C  25     -21.291 -14.702   7.280  1.00 17.62           C  
ANISOU 1727  CB  ASN C  25     3219   1512   1963   -246  -1110   -224       C  
ATOM   1728  CG  ASN C  25     -20.478 -15.507   8.284  1.00 17.31           C  
ANISOU 1728  CG  ASN C  25     3174   1503   1899   -258  -1071   -280       C  
ATOM   1729  OD1 ASN C  25     -20.725 -15.468   9.490  1.00 13.22           O  
ANISOU 1729  OD1 ASN C  25     2583    972   1469   -312  -1013   -269       O  
ATOM   1730  ND2 ASN C  25     -19.497 -16.238   7.781  1.00 16.96           N  
ANISOU 1730  ND2 ASN C  25     3209   1501   1734   -205  -1102   -338       N  
ATOM   1731  N   THR C  26     -23.363 -12.418   6.599  1.00 12.72           N  
ANISOU 1731  N   THR C  26     2500    819   1515   -280  -1075    -62       N  
ATOM   1732  CA  THR C  26     -24.000 -11.648   5.534  1.00 15.71           C  
ANISOU 1732  CA  THR C  26     2888   1180   1900   -258  -1110     -5       C  
ATOM   1733  C   THR C  26     -23.174 -10.413   5.177  1.00 15.60           C  
ANISOU 1733  C   THR C  26     2893   1219   1816   -237   -983     -6       C  
ATOM   1734  O   THR C  26     -22.251 -10.037   5.900  1.00 16.85           O  
ANISOU 1734  O   THR C  26     3040   1421   1940   -252   -860    -41       O  
ATOM   1735  CB  THR C  26     -25.468 -11.265   5.884  1.00 13.60           C  
ANISOU 1735  CB  THR C  26     2535    848   1785   -297  -1133     82       C  
ATOM   1736  OG1 THR C  26     -26.210 -10.996   4.685  1.00 14.37           O  
ANISOU 1736  OG1 THR C  26     2654    922   1883   -271  -1227    135       O  
ATOM   1737  CG2 THR C  26     -25.516 -10.042   6.801  1.00 13.15           C  
ANISOU 1737  CG2 THR C  26     2403    792   1801   -330   -970    118       C  
ATOM   1738  N   ARG C  27     -23.497  -9.790   4.053  1.00 15.09           N  
ANISOU 1738  N   ARG C  27     2857   1151   1726   -205  -1017     33       N  
ATOM   1739  CA  ARG C  27     -22.757  -8.617   3.616  1.00 16.79           C  
ANISOU 1739  CA  ARG C  27     3094   1414   1872   -184   -905     36       C  
ATOM   1740  C   ARG C  27     -23.703  -7.634   2.959  1.00 17.02           C  
ANISOU 1740  C   ARG C  27     3098   1408   1961   -179   -911    118       C  
ATOM   1741  O   ARG C  27     -24.690  -8.039   2.342  1.00 14.74           O  
ANISOU 1741  O   ARG C  27     2808   1076   1715   -171  -1037    159       O  
ATOM   1742  CB  ARG C  27     -21.677  -9.014   2.605  1.00 21.87           C  
ANISOU 1742  CB  ARG C  27     3836   2115   2360   -127   -941    -22       C  
ATOM   1743  N   PHE C  28     -23.395  -6.350   3.109  1.00 13.92           N  
ANISOU 1743  N   PHE C  28     3133   1037   1117     90   -478     52       N  
ATOM   1744  CA  PHE C  28     -24.006  -5.296   2.323  1.00 15.79           C  
ANISOU 1744  CA  PHE C  28     3396   1270   1333     34   -525    105       C  
ATOM   1745  C   PHE C  28     -22.900  -4.721   1.440  1.00 16.32           C  
ANISOU 1745  C   PHE C  28     3543   1376   1284     72   -403     68       C  
ATOM   1746  O   PHE C  28     -21.752  -4.600   1.874  1.00 13.90           O  
ANISOU 1746  O   PHE C  28     3169   1126    986    136   -264     30       O  
ATOM   1747  CB  PHE C  28     -24.571  -4.185   3.222  1.00 15.73           C  
ANISOU 1747  CB  PHE C  28     3204   1308   1467      0   -515    168       C  
ATOM   1748  CG  PHE C  28     -25.839  -4.557   3.942  1.00 15.09           C  
ANISOU 1748  CG  PHE C  28     3042   1180   1509    -47   -622    223       C  
ATOM   1749  CD1 PHE C  28     -27.070  -4.501   3.289  1.00 15.58           C  
ANISOU 1749  CD1 PHE C  28     3141   1166   1613   -116   -771    296       C  
ATOM   1750  CD2 PHE C  28     -25.809  -4.934   5.279  1.00 18.51           C  
ANISOU 1750  CD2 PHE C  28     3362   1645   2028    -30   -576    214       C  
ATOM   1751  CE1 PHE C  28     -28.234  -4.829   3.950  1.00 16.88           C  
ANISOU 1751  CE1 PHE C  28     3212   1282   1917   -158   -858    362       C  
ATOM   1752  CE2 PHE C  28     -26.981  -5.271   5.954  1.00 18.48           C  
ANISOU 1752  CE2 PHE C  28     3282   1600   2141    -74   -654    272       C  
ATOM   1753  CZ  PHE C  28     -28.189  -5.217   5.294  1.00 17.65           C  
ANISOU 1753  CZ  PHE C  28     3196   1417   2095   -133   -787    347       C  
ATOM   1754  N   ILE C  29     -23.251  -4.363   0.210  1.00 15.90           N  
ANISOU 1754  N   ILE C  29     3629   1286   1127     25   -462     90       N  
ATOM   1755  CA  ILE C  29     -22.286  -3.852  -0.757  1.00 17.00           C  
ANISOU 1755  CA  ILE C  29     3868   1455   1135     51   -345     63       C  
ATOM   1756  C   ILE C  29     -22.870  -2.622  -1.442  1.00 19.51           C  
ANISOU 1756  C   ILE C  29     4192   1779   1441    -25   -410    143       C  
ATOM   1757  O   ILE C  29     -24.042  -2.619  -1.839  1.00 20.66           O  
ANISOU 1757  O   ILE C  29     4391   1860   1599   -107   -580    203       O  
ATOM   1758  CB  ILE C  29     -21.947  -4.939  -1.819  1.00 24.67           C  
ANISOU 1758  CB  ILE C  29     5083   2357   1932     70   -336     -8       C  
ATOM   1759  CG1 ILE C  29     -21.353  -6.169  -1.139  1.00 26.46           C  
ANISOU 1759  CG1 ILE C  29     5291   2565   2197    150   -273    -83       C  
ATOM   1760  CG2 ILE C  29     -20.985  -4.403  -2.868  1.00 26.19           C  
ANISOU 1760  CG2 ILE C  29     5394   2578   1978     93   -193    -32       C  
ATOM   1761  CD1 ILE C  29     -21.393  -7.458  -1.978  1.00 30.77           C  
ANISOU 1761  CD1 ILE C  29     6072   3010   2608    160   -310   -156       C  
ATOM   1762  N   LEU C  30     -22.061  -1.590  -1.580  1.00 15.74           N  
ANISOU 1762  N   LEU C  30     3654   1370    955     -4   -288    155       N  
ATOM   1763  CA  LEU C  30     -22.419  -0.411  -2.351  1.00 16.39           C  
ANISOU 1763  CA  LEU C  30     3756   1459   1014    -73   -335    231       C  
ATOM   1764  C   LEU C  30     -21.192   0.158  -3.033  1.00 15.78           C  
ANISOU 1764  C   LEU C  30     3730   1438    828    -36   -174    214       C  
ATOM   1765  O   LEU C  30     -20.089  -0.198  -2.715  1.00 15.40           O  
ANISOU 1765  O   LEU C  30     3652   1429    771     46    -20    155       O  
ATOM   1766  CB  LEU C  30     -23.118   0.649  -1.484  1.00 14.26           C  
ANISOU 1766  CB  LEU C  30     3273   1209    937   -107   -387    303       C  
ATOM   1767  CG  LEU C  30     -22.328   1.449  -0.453  1.00 13.59           C  
ANISOU 1767  CG  LEU C  30     2996   1203    965    -53   -251    291       C  
ATOM   1768  CD1 LEU C  30     -22.980   2.736  -0.118  1.00 14.34           C  
ANISOU 1768  CD1 LEU C  30     2949   1300   1200   -101   -296    364       C  
ATOM   1769  CD2 LEU C  30     -22.077   0.665   0.820  1.00 11.64           C  
ANISOU 1769  CD2 LEU C  30     2655    974    795      2   -203    234       C  
ATOM   1770  N   ASN C  31     -21.409   1.083  -3.943  1.00 15.28           N  
ANISOU 1770  N   ASN C  31     3730   1375    701   -103   -215    281       N  
ATOM   1771  CA  ASN C  31     -20.289   1.758  -4.580  1.00 15.81           C  
ANISOU 1771  CA  ASN C  31     3829   1499    677    -77    -59    284       C  
ATOM   1772  C   ASN C  31     -20.480   3.257  -4.547  1.00 16.71           C  
ANISOU 1772  C   ASN C  31     3808   1651    890   -127    -89    379       C  
ATOM   1773  O   ASN C  31     -21.547   3.748  -4.886  1.00 18.19           O  
ANISOU 1773  O   ASN C  31     4008   1792   1110   -215   -252    454       O  
ATOM   1774  CB  ASN C  31     -20.130   1.323  -6.036  1.00 19.44           C  
ANISOU 1774  CB  ASN C  31     4569   1920    898   -111    -46    267       C  
ATOM   1775  CG  ASN C  31     -18.913   1.951  -6.680  1.00 23.27           C  
ANISOU 1775  CG  ASN C  31     5087   2465   1289    -78    147    272       C  
ATOM   1776  OD1 ASN C  31     -17.805   1.444  -6.534  1.00 24.06           O  
ANISOU 1776  OD1 ASN C  31     5180   2592   1370     17    335    204       O  
ATOM   1777  ND2 ASN C  31     -19.107   3.081  -7.367  1.00 26.17           N  
ANISOU 1777  ND2 ASN C  31     5472   2851   1619   -156    102    363       N  
ATOM   1778  N   VAL C  32     -19.442   3.984  -4.150  1.00 18.37           N  
ANISOU 1778  N   VAL C  32     3884   1932   1162    -74     59    381       N  
ATOM   1779  CA  VAL C  32     -19.522   5.434  -4.112  1.00 20.13           C  
ANISOU 1779  CA  VAL C  32     3978   2185   1484   -118     37    467       C  
ATOM   1780  C   VAL C  32     -18.494   6.047  -5.046  1.00 22.37           C  
ANISOU 1780  C   VAL C  32     4329   2516   1655   -115    165    499       C  
ATOM   1781  O   VAL C  32     -17.326   5.652  -5.049  1.00 21.84           O  
ANISOU 1781  O   VAL C  32     4271   2488   1541    -38    336    451       O  
ATOM   1782  CB  VAL C  32     -19.346   5.989  -2.678  1.00 17.14           C  
ANISOU 1782  CB  VAL C  32     3360   1841   1311    -77     71    459       C  
ATOM   1783  CG1 VAL C  32     -17.999   5.569  -2.083  1.00 16.07           C  
ANISOU 1783  CG1 VAL C  32     3164   1759   1184     15    238    398       C  
ATOM   1784  CG2 VAL C  32     -19.507   7.500  -2.669  1.00 16.05           C  
ANISOU 1784  CG2 VAL C  32     3101   1716   1283   -125     40    542       C  
ATOM   1785  N   GLN C  33     -18.954   6.995  -5.858  1.00 22.83           N  
ANISOU 1785  N   GLN C  33     4430   2563   1682   -201     79    591       N  
ATOM   1786  CA  GLN C  33     -18.083   7.743  -6.752  1.00 25.96           C  
ANISOU 1786  CA  GLN C  33     4880   3005   1980   -215    188    644       C  
ATOM   1787  C   GLN C  33     -17.949   9.148  -6.192  1.00 23.52           C  
ANISOU 1787  C   GLN C  33     4353   2729   1855   -229    178    719       C  
ATOM   1788  O   GLN C  33     -18.936   9.874  -6.077  1.00 26.25           O  
ANISOU 1788  O   GLN C  33     4629   3036   2311   -298     24    784       O  
ATOM   1789  CB  GLN C  33     -18.671   7.785  -8.161  1.00 28.19           C  
ANISOU 1789  CB  GLN C  33     5397   3246   2070   -319     86    702       C  
ATOM   1790  N   SER C  34     -16.730   9.529  -5.837  1.00 21.84           N  
ANISOU 1790  N   SER C  34     4028   2577   1693   -164    340    713       N  
ATOM   1791  CA  SER C  34     -16.521  10.731  -5.043  1.00 22.88           C  
ANISOU 1791  CA  SER C  34     3943   2732   2019   -165    332    762       C  
ATOM   1792  C   SER C  34     -15.184  11.397  -5.360  1.00 25.31           C  
ANISOU 1792  C   SER C  34     4194   3099   2322   -136    486    811       C  
ATOM   1793  O   SER C  34     -14.183  10.716  -5.556  1.00 25.00           O  
ANISOU 1793  O   SER C  34     4202   3091   2206    -70    644    773       O  
ATOM   1794  CB  SER C  34     -16.592  10.356  -3.563  1.00 22.65           C  
ANISOU 1794  CB  SER C  34     3765   2698   2144   -107    327    688       C  
ATOM   1795  OG  SER C  34     -16.431  11.488  -2.737  1.00 23.24           O  
ANISOU 1795  OG  SER C  34     3654   2781   2394   -113    315    722       O  
ATOM   1796  N   LYS C  35     -15.174  12.729  -5.420  1.00 25.91           N  
ANISOU 1796  N   LYS C  35     4163   3183   2498   -186    442    901       N  
ATOM   1797  CA  LYS C  35     -13.934  13.480  -5.636  1.00 26.95           C  
ANISOU 1797  CA  LYS C  35     4213   3367   2660   -166    573    965       C  
ATOM   1798  C   LYS C  35     -13.959  14.822  -4.923  1.00 25.45           C  
ANISOU 1798  C   LYS C  35     3827   3170   2673   -195    502   1023       C  
ATOM   1799  O   LYS C  35     -14.735  15.701  -5.286  1.00 28.06           O  
ANISOU 1799  O   LYS C  35     4150   3469   3045   -271    379   1093       O  
ATOM   1800  CB  LYS C  35     -13.671  13.701  -7.131  1.00 33.56           C  
ANISOU 1800  CB  LYS C  35     5212   4224   3314   -217    630   1042       C  
ATOM   1801  CG  LYS C  35     -12.410  14.488  -7.411  1.00 38.56           C  
ANISOU 1801  CG  LYS C  35     5755   4911   3985   -200    774   1124       C  
ATOM   1802  CD  LYS C  35     -12.198  14.690  -8.909  1.00 45.56           C  
ANISOU 1802  CD  LYS C  35     6823   5819   4670   -259    842   1203       C  
ATOM   1803  CE  LYS C  35     -11.991  13.367  -9.621  1.00 49.62           C  
ANISOU 1803  CE  LYS C  35     7562   6332   4960   -221    970   1123       C  
ATOM   1804  NZ  LYS C  35     -11.775  13.564 -11.084  1.00 55.20           N  
ANISOU 1804  NZ  LYS C  35     8477   7056   5442   -286   1050   1195       N  
ATOM   1805  N   PRO C  36     -13.116  14.990  -3.892  1.00 26.89           N  
ANISOU 1805  N   PRO C  36     3854   3371   2992   -139    567    999       N  
ATOM   1806  CA  PRO C  36     -12.156  14.026  -3.337  1.00 26.57           C  
ANISOU 1806  CA  PRO C  36     3789   3358   2950    -53    693    935       C  
ATOM   1807  C   PRO C  36     -12.840  12.748  -2.852  1.00 23.13           C  
ANISOU 1807  C   PRO C  36     3432   2896   2460    -21    656    827       C  
ATOM   1808  O   PRO C  36     -14.044  12.779  -2.570  1.00 21.53           O  
ANISOU 1808  O   PRO C  36     3250   2652   2278    -61    524    800       O  
ATOM   1809  CB  PRO C  36     -11.572  14.773  -2.133  1.00 26.54           C  
ANISOU 1809  CB  PRO C  36     3590   3351   3141    -42    676    947       C  
ATOM   1810  CG  PRO C  36     -11.846  16.218  -2.403  1.00 28.84           C  
ANISOU 1810  CG  PRO C  36     3815   3629   3514   -111    598   1034       C  
ATOM   1811  CD  PRO C  36     -13.149  16.239  -3.116  1.00 28.00           C  
ANISOU 1811  CD  PRO C  36     3825   3491   3323   -168    494   1039       C  
ATOM   1812  N   THR C  37     -12.088  11.653  -2.755  1.00 23.66           N  
ANISOU 1812  N   THR C  37     3533   2978   2478     52    772    773       N  
ATOM   1813  CA  THR C  37     -12.654  10.403  -2.259  1.00 21.67           C  
ANISOU 1813  CA  THR C  37     3349   2699   2185     85    736    675       C  
ATOM   1814  C   THR C  37     -13.223  10.654  -0.876  1.00 20.91           C  
ANISOU 1814  C   THR C  37     3130   2581   2234     70    625    640       C  
ATOM   1815  O   THR C  37     -12.709  11.480  -0.127  1.00 21.17           O  
ANISOU 1815  O   THR C  37     3022   2624   2399     65    622    671       O  
ATOM   1816  CB  THR C  37     -11.625   9.249  -2.207  1.00 23.74           C  
ANISOU 1816  CB  THR C  37     3632   2972   2419    171    882    629       C  
ATOM   1817  OG1 THR C  37     -10.543   9.615  -1.344  1.00 27.22           O  
ANISOU 1817  OG1 THR C  37     3895   3431   3019    206    936    661       O  
ATOM   1818  CG2 THR C  37     -11.086   8.916  -3.621  1.00 20.13           C  
ANISOU 1818  CG2 THR C  37     3323   2525   1799    191   1027    648       C  
ATOM   1819  N   ALA C  38     -14.280   9.925  -0.539  1.00 19.33           N  
ANISOU 1819  N   ALA C  38     2992   2347   2005     61    536    578       N  
ATOM   1820  CA  ALA C  38     -15.108  10.258   0.607  1.00 18.57           C  
ANISOU 1820  CA  ALA C  38     2807   2221   2027     33    434    550       C  
ATOM   1821  C   ALA C  38     -14.666   9.552   1.885  1.00 17.63           C  
ANISOU 1821  C   ALA C  38     2622   2107   1970     76    456    488       C  
ATOM   1822  O   ALA C  38     -14.017   8.506   1.840  1.00 14.17           O  
ANISOU 1822  O   ALA C  38     2223   1681   1481    129    523    457       O  
ATOM   1823  CB  ALA C  38     -16.563   9.927   0.297  1.00 19.94           C  
ANISOU 1823  CB  ALA C  38     3067   2348   2162     -8    322    536       C  
ATOM   1824  N   GLU C  39     -15.016  10.150   3.018  1.00 15.34           N  
ANISOU 1824  N   GLU C  39     2237   1799   1791     49    401    473       N  
ATOM   1825  CA  GLU C  39     -14.950   9.484   4.317  1.00 14.37           C  
ANISOU 1825  CA  GLU C  39     2080   1670   1711     64    389    413       C  
ATOM   1826  C   GLU C  39     -16.179   8.603   4.419  1.00 13.90           C  
ANISOU 1826  C   GLU C  39     2094   1580   1607     57    331    365       C  
ATOM   1827  O   GLU C  39     -17.272   9.007   4.019  1.00 15.71           O  
ANISOU 1827  O   GLU C  39     2345   1777   1846     21    271    380       O  
ATOM   1828  CB  GLU C  39     -14.989  10.521   5.452  1.00 13.99           C  
ANISOU 1828  CB  GLU C  39     1936   1604   1775     24    356    409       C  
ATOM   1829  CG  GLU C  39     -13.850  11.523   5.435  1.00 18.65           C  
ANISOU 1829  CG  GLU C  39     2443   2211   2430     17    386    466       C  
ATOM   1830  CD  GLU C  39     -14.120  12.721   6.331  1.00 25.26           C  
ANISOU 1830  CD  GLU C  39     3217   3013   3369    -33    340    459       C  
ATOM   1831  OE1 GLU C  39     -15.282  13.165   6.391  1.00 30.30           O  
ANISOU 1831  OE1 GLU C  39     3867   3612   4034    -61    304    436       O  
ATOM   1832  OE2 GLU C  39     -13.175  13.219   6.971  1.00 24.09           O  
ANISOU 1832  OE2 GLU C  39     3006   2865   3281    -47    338    478       O  
ATOM   1833  N   VAL C  40     -16.024   7.407   4.972  1.00 12.56           N  
ANISOU 1833  N   VAL C  40     1953   1413   1408     88    337    318       N  
ATOM   1834  CA  VAL C  40     -17.143   6.464   5.006  1.00  9.05           C  
ANISOU 1834  CA  VAL C  40     1579    936    923     83    278    281       C  
ATOM   1835  C   VAL C  40     -17.390   6.068   6.443  1.00  9.07           C  
ANISOU 1835  C   VAL C  40     1536    930    980     72    256    239       C  
ATOM   1836  O   VAL C  40     -16.466   5.629   7.128  1.00 10.94           O  
ANISOU 1836  O   VAL C  40     1744   1187   1226     93    284    225       O  
ATOM   1837  CB  VAL C  40     -16.812   5.200   4.192  1.00 12.55           C  
ANISOU 1837  CB  VAL C  40     2127   1379   1261    128    304    261       C  
ATOM   1838  CG1 VAL C  40     -17.873   4.112   4.393  1.00 10.17           C  
ANISOU 1838  CG1 VAL C  40     1894   1040    932    120    229    225       C  
ATOM   1839  CG2 VAL C  40     -16.654   5.556   2.727  1.00  9.55           C  
ANISOU 1839  CG2 VAL C  40     1829   1004    796    128    333    299       C  
ATOM   1840  N   LYS C  41     -18.627   6.248   6.907  1.00  9.49           N  
ANISOU 1840  N   LYS C  41     1580    948   1078     35    207    228       N  
ATOM   1841  CA  LYS C  41     -19.045   5.734   8.215  1.00 13.11           C  
ANISOU 1841  CA  LYS C  41     2020   1395   1566     20    195    189       C  
ATOM   1842  C   LYS C  41     -20.229   4.772   8.077  1.00 13.07           C  
ANISOU 1842  C   LYS C  41     2064   1355   1548     15    141    182       C  
ATOM   1843  O   LYS C  41     -21.110   4.986   7.246  1.00 10.50           O  
ANISOU 1843  O   LYS C  41     1758    995   1237      0     97    213       O  
ATOM   1844  CB  LYS C  41     -19.424   6.876   9.159  1.00 14.07           C  
ANISOU 1844  CB  LYS C  41     2077   1498   1771    -21    214    179       C  
ATOM   1845  CG  LYS C  41     -18.224   7.656   9.700  1.00 18.70           C  
ANISOU 1845  CG  LYS C  41     2622   2109   2374    -29    246    178       C  
ATOM   1846  CD  LYS C  41     -18.670   8.832  10.566  1.00 21.87           C  
ANISOU 1846  CD  LYS C  41     2985   2475   2848    -74    265    157       C  
ATOM   1847  CE  LYS C  41     -17.481   9.500  11.239  1.00 22.26           C  
ANISOU 1847  CE  LYS C  41     3012   2539   2908    -95    273    155       C  
ATOM   1848  NZ  LYS C  41     -16.702   8.514  12.053  1.00 22.42           N  
ANISOU 1848  NZ  LYS C  41     3059   2585   2874    -99    253    143       N  
ATOM   1849  N   TRP C  42     -20.261   3.744   8.926  1.00  9.06           N  
ANISOU 1849  N   TRP C  42     1571    849   1023     19    132    153       N  
ATOM   1850  CA  TRP C  42     -21.339   2.759   8.914  1.00  8.94           C  
ANISOU 1850  CA  TRP C  42     1593    797   1007     11     75    153       C  
ATOM   1851  C   TRP C  42     -22.093   2.837  10.218  1.00  9.25           C  
ANISOU 1851  C   TRP C  42     1586    821   1109    -26     91    141       C  
ATOM   1852  O   TRP C  42     -21.459   2.990  11.271  1.00  9.35           O  
ANISOU 1852  O   TRP C  42     1581    860   1113    -38    132    114       O  
ATOM   1853  CB  TRP C  42     -20.763   1.350   8.790  1.00  9.85           C  
ANISOU 1853  CB  TRP C  42     1770    920   1051     46     53    133       C  
ATOM   1854  CG  TRP C  42     -20.318   1.006   7.424  1.00 11.15           C  
ANISOU 1854  CG  TRP C  42     2012   1080   1143     83     47    137       C  
ATOM   1855  CD1 TRP C  42     -19.072   1.169   6.888  1.00 13.48           C  
ANISOU 1855  CD1 TRP C  42     2319   1406   1398    124    112    132       C  
ATOM   1856  CD2 TRP C  42     -21.129   0.431   6.404  1.00 12.20           C  
ANISOU 1856  CD2 TRP C  42     2235   1168   1232     78    -23    148       C  
ATOM   1857  NE1 TRP C  42     -19.062   0.720   5.587  1.00 10.79           N  
ANISOU 1857  NE1 TRP C  42     2082   1044    975    148    106    130       N  
ATOM   1858  CE2 TRP C  42     -20.313   0.267   5.267  1.00 10.87           C  
ANISOU 1858  CE2 TRP C  42     2152   1006    972    115     13    138       C  
ATOM   1859  CE3 TRP C  42     -22.465   0.031   6.346  1.00 12.24           C  
ANISOU 1859  CE3 TRP C  42     2260   1121   1271     41   -114    171       C  
ATOM   1860  CZ2 TRP C  42     -20.796  -0.278   4.081  1.00  9.90           C  
ANISOU 1860  CZ2 TRP C  42     2159    838    764    109    -46    140       C  
ATOM   1861  CZ3 TRP C  42     -22.939  -0.526   5.178  1.00  9.61           C  
ANISOU 1861  CZ3 TRP C  42     2039    739    872     32   -193    185       C  
ATOM   1862  CH2 TRP C  42     -22.104  -0.668   4.054  1.00 12.45           C  
ANISOU 1862  CH2 TRP C  42     2509   1106   1115     63   -161    164       C  
ATOM   1863  N   TYR C  43     -23.421   2.673  10.158  1.00 10.28           N  
ANISOU 1863  N   TYR C  43     1704    903   1301    -48     57    165       N  
ATOM   1864  CA  TYR C  43     -24.290   2.685  11.345  1.00  8.57           C  
ANISOU 1864  CA  TYR C  43     1443    662   1152    -80     94    159       C  
ATOM   1865  C   TYR C  43     -25.241   1.478  11.378  1.00  9.86           C  
ANISOU 1865  C   TYR C  43     1623    791   1334    -89     33    187       C  
ATOM   1866  O   TYR C  43     -25.637   0.983  10.336  1.00 10.24           O  
ANISOU 1866  O   TYR C  43     1703    808   1380    -81    -52    221       O  
ATOM   1867  CB  TYR C  43     -25.145   3.970  11.351  1.00  7.15           C  
ANISOU 1867  CB  TYR C  43     1191    436   1091   -101    139    179       C  
ATOM   1868  CG  TYR C  43     -24.339   5.248  11.358  1.00 11.16           C  
ANISOU 1868  CG  TYR C  43     1678    964   1599    -99    193    157       C  
ATOM   1869  CD1 TYR C  43     -24.134   5.946  12.537  1.00 11.36           C  
ANISOU 1869  CD1 TYR C  43     1686    990   1639   -121    278    111       C  
ATOM   1870  CD2 TYR C  43     -23.794   5.766  10.181  1.00 10.73           C  
ANISOU 1870  CD2 TYR C  43     1629    922   1525    -82    155    183       C  
ATOM   1871  CE1 TYR C  43     -23.393   7.118  12.556  1.00  7.42           C  
ANISOU 1871  CE1 TYR C  43     1172    500   1148   -125    312     93       C  
ATOM   1872  CE2 TYR C  43     -23.047   6.933  10.193  1.00 11.64           C  
ANISOU 1872  CE2 TYR C  43     1716   1053   1652    -84    197    173       C  
ATOM   1873  CZ  TYR C  43     -22.850   7.597  11.392  1.00 11.69           C  
ANISOU 1873  CZ  TYR C  43     1701   1055   1686   -105    269    128       C  
ATOM   1874  OH  TYR C  43     -22.128   8.760  11.431  1.00 13.89           O  
ANISOU 1874  OH  TYR C  43     1955   1338   1983   -113    297    120       O  
ATOM   1875  N   HIS C  44     -25.615   1.028  12.575  1.00  8.23           N  
ANISOU 1875  N   HIS C  44     1401    583   1142   -112     73    176       N  
ATOM   1876  CA  HIS C  44     -26.666   0.023  12.752  1.00  8.93           C  
ANISOU 1876  CA  HIS C  44     1483    632   1278   -129     26    216       C  
ATOM   1877  C   HIS C  44     -27.685   0.569  13.732  1.00 11.91           C  
ANISOU 1877  C   HIS C  44     1791    976   1760   -161    121    229       C  
ATOM   1878  O   HIS C  44     -27.354   0.848  14.890  1.00 11.38           O  
ANISOU 1878  O   HIS C  44     1735    937   1653   -182    215    187       O  
ATOM   1879  CB  HIS C  44     -26.104  -1.288  13.317  1.00  7.25           C  
ANISOU 1879  CB  HIS C  44     1326    451    980   -128    -11    199       C  
ATOM   1880  CG  HIS C  44     -27.156  -2.323  13.630  1.00 11.53           C  
ANISOU 1880  CG  HIS C  44     1855    952   1574   -151    -58    246       C  
ATOM   1881  ND1 HIS C  44     -27.059  -3.185  14.700  1.00 12.45           N  
ANISOU 1881  ND1 HIS C  44     1987   1088   1653   -175    -49    244       N  
ATOM   1882  CD2 HIS C  44     -28.311  -2.647  12.991  1.00 12.45           C  
ANISOU 1882  CD2 HIS C  44     1942   1004   1783   -160   -129    307       C  
ATOM   1883  CE1 HIS C  44     -28.112  -3.990  14.718  1.00 13.16           C  
ANISOU 1883  CE1 HIS C  44     2055   1132   1813   -194   -100    300       C  
ATOM   1884  NE2 HIS C  44     -28.884  -3.687  13.692  1.00 13.76           N  
ANISOU 1884  NE2 HIS C  44     2101   1154   1975   -185   -153    340       N  
ATOM   1885  N   ASN C  45     -28.924   0.701  13.279  1.00 11.63           N  
ANISOU 1885  N   ASN C  45     1688    871   1859   -170     97    292       N  
ATOM   1886  CA  ASN C  45     -29.984   1.271  14.106  1.00 14.52           C  
ANISOU 1886  CA  ASN C  45     1970   1187   2360   -191    210    314       C  
ATOM   1887  C   ASN C  45     -29.560   2.573  14.791  1.00 15.16           C  
ANISOU 1887  C   ASN C  45     2041   1280   2437   -192    348    250       C  
ATOM   1888  O   ASN C  45     -29.825   2.767  15.970  1.00 14.95           O  
ANISOU 1888  O   ASN C  45     2014   1248   2417   -213    476    218       O  
ATOM   1889  CB  ASN C  45     -30.482   0.247  15.134  1.00 17.93           C  
ANISOU 1889  CB  ASN C  45     2406   1620   2788   -216    244    329       C  
ATOM   1890  CG  ASN C  45     -31.251  -0.905  14.491  1.00 18.58           C  
ANISOU 1890  CG  ASN C  45     2470   1658   2931   -222    109    410       C  
ATOM   1891  OD1 ASN C  45     -31.239  -2.030  14.990  1.00 21.30           O  
ANISOU 1891  OD1 ASN C  45     2850   2021   3223   -237     76    420       O  
ATOM   1892  ND2 ASN C  45     -31.900  -0.629  13.366  1.00 11.81           N  
ANISOU 1892  ND2 ASN C  45     1565    738   2185   -219     16    474       N  
ATOM   1893  N   GLY C  46     -28.888   3.448  14.043  1.00 13.02           N  
ANISOU 1893  N   GLY C  46     1776   1022   2148   -173    322    231       N  
ATOM   1894  CA  GLY C  46     -28.552   4.782  14.522  1.00 11.42           C  
ANISOU 1894  CA  GLY C  46     1559    815   1966   -175    432    178       C  
ATOM   1895  C   GLY C  46     -27.136   4.951  15.059  1.00 11.08           C  
ANISOU 1895  C   GLY C  46     1601    843   1764   -181    449    106       C  
ATOM   1896  O   GLY C  46     -26.577   6.055  15.036  1.00 11.12           O  
ANISOU 1896  O   GLY C  46     1604    849   1772   -180    486     73       O  
ATOM   1897  N   VAL C  47     -26.552   3.856  15.539  1.00 10.65           N  
ANISOU 1897  N   VAL C  47     1614    842   1589   -192    410     92       N  
ATOM   1898  CA  VAL C  47     -25.268   3.901  16.239  1.00 11.57           C  
ANISOU 1898  CA  VAL C  47     1805   1016   1577   -211    415     41       C  
ATOM   1899  C   VAL C  47     -24.112   3.489  15.338  1.00 10.96           C  
ANISOU 1899  C   VAL C  47     1747    987   1430   -179    314     54       C  
ATOM   1900  O   VAL C  47     -24.169   2.453  14.669  1.00 11.45           O  
ANISOU 1900  O   VAL C  47     1817   1056   1476   -154    236     85       O  
ATOM   1901  CB  VAL C  47     -25.297   2.980  17.478  1.00 10.88           C  
ANISOU 1901  CB  VAL C  47     1778    949   1408   -253    438     28       C  
ATOM   1902  CG1 VAL C  47     -23.950   3.007  18.207  1.00  9.47           C  
ANISOU 1902  CG1 VAL C  47     1676    818   1106   -287    414     -8       C  
ATOM   1903  CG2 VAL C  47     -26.443   3.391  18.410  1.00  9.26           C  
ANISOU 1903  CG2 VAL C  47     1562    693   1264   -284    572     13       C  
ATOM   1904  N   GLU C  48     -23.064   4.306  15.315  1.00 10.63           N  
ANISOU 1904  N   GLU C  48     1715    970   1356   -179    321     30       N  
ATOM   1905  CA  GLU C  48     -21.923   4.060  14.442  1.00  8.62           C  
ANISOU 1905  CA  GLU C  48     1466    755   1056   -144    254     48       C  
ATOM   1906  C   GLU C  48     -21.225   2.756  14.780  1.00 11.66           C  
ANISOU 1906  C   GLU C  48     1890   1171   1368   -141    198     53       C  
ATOM   1907  O   GLU C  48     -20.977   2.466  15.938  1.00  6.85           O  
ANISOU 1907  O   GLU C  48     1315    572    716   -185    203     39       O  
ATOM   1908  CB  GLU C  48     -20.898   5.181  14.562  1.00  6.81           C  
ANISOU 1908  CB  GLU C  48     1227    540    821   -154    274     33       C  
ATOM   1909  CG  GLU C  48     -19.808   5.085  13.530  1.00 14.96           C  
ANISOU 1909  CG  GLU C  48     2244   1605   1834   -112    232     63       C  
ATOM   1910  CD  GLU C  48     -18.818   6.245  13.605  1.00 17.72           C  
ANISOU 1910  CD  GLU C  48     2569   1965   2201   -126    246     65       C  
ATOM   1911  OE1 GLU C  48     -19.133   7.272  14.256  1.00 16.56           O  
ANISOU 1911  OE1 GLU C  48     2419   1788   2086   -164    284     38       O  
ATOM   1912  OE2 GLU C  48     -17.733   6.112  13.004  1.00 16.54           O  
ANISOU 1912  OE2 GLU C  48     2401   1843   2040    -96    225     96       O  
ATOM   1913  N   LEU C  49     -20.866   2.001  13.754  1.00 10.09           N  
ANISOU 1913  N   LEU C  49     1697    983   1155    -93    146     75       N  
ATOM   1914  CA  LEU C  49     -20.191   0.715  13.939  1.00 10.52           C  
ANISOU 1914  CA  LEU C  49     1779   1053   1165    -79     95     82       C  
ATOM   1915  C   LEU C  49     -18.675   0.898  13.960  1.00 11.76           C  
ANISOU 1915  C   LEU C  49     1922   1238   1310    -65     92     90       C  
ATOM   1916  O   LEU C  49     -18.165   1.846  13.369  1.00 11.83           O  
ANISOU 1916  O   LEU C  49     1903   1256   1337    -48    122     95       O  
ATOM   1917  CB  LEU C  49     -20.550  -0.207  12.780  1.00  9.90           C  
ANISOU 1917  CB  LEU C  49     1727    955   1081    -30     51     94       C  
ATOM   1918  CG  LEU C  49     -22.006  -0.653  12.745  1.00  9.95           C  
ANISOU 1918  CG  LEU C  49     1741    923   1118    -48     23    107       C  
ATOM   1919  CD1 LEU C  49     -22.309  -1.406  11.439  1.00  7.33           C  
ANISOU 1919  CD1 LEU C  49     1455    560    771    -10    -40    120       C  
ATOM   1920  CD2 LEU C  49     -22.281  -1.528  13.961  1.00 13.25           C  
ANISOU 1920  CD2 LEU C  49     2167   1340   1527    -85      8    110       C  
ATOM   1921  N   GLN C  50     -17.963  -0.006  14.629  1.00 10.10           N  
ANISOU 1921  N   GLN C  50     1521   1356    960   -700   -781    215       N  
ATOM   1922  CA  GLN C  50     -16.504  -0.061  14.529  1.00 13.60           C  
ANISOU 1922  CA  GLN C  50     1759   1932   1477   -642   -799    247       C  
ATOM   1923  C   GLN C  50     -16.058  -1.467  14.096  1.00 13.62           C  
ANISOU 1923  C   GLN C  50     1747   1939   1490   -437   -793    257       C  
ATOM   1924  O   GLN C  50     -16.805  -2.445  14.264  1.00 11.62           O  
ANISOU 1924  O   GLN C  50     1652   1587   1178   -359   -823    235       O  
ATOM   1925  CB  GLN C  50     -15.852   0.297  15.874  1.00 16.11           C  
ANISOU 1925  CB  GLN C  50     2007   2299   1816   -741   -946    272       C  
ATOM   1926  N   GLU C  51     -14.859  -1.569  13.527  1.00 13.12           N  
ANISOU 1926  N   GLU C  51     1497   1976   1511   -347   -739    295       N  
ATOM   1927  CA  GLU C  51     -14.302  -2.884  13.195  1.00 18.38           C  
ANISOU 1927  CA  GLU C  51     2139   2642   2205   -145   -716    316       C  
ATOM   1928  C   GLU C  51     -14.255  -3.753  14.456  1.00 17.58           C  
ANISOU 1928  C   GLU C  51     2074   2512   2094   -103   -879    337       C  
ATOM   1929  O   GLU C  51     -13.807  -3.296  15.507  1.00 14.88           O  
ANISOU 1929  O   GLU C  51     1647   2226   1782   -201  -1013    372       O  
ATOM   1930  CB  GLU C  51     -12.882  -2.750  12.641  1.00 18.80           C  
ANISOU 1930  CB  GLU C  51     1948   2809   2385    -65   -637    377       C  
ATOM   1931  CG  GLU C  51     -12.716  -1.750  11.499  1.00 22.44           C  
ANISOU 1931  CG  GLU C  51     2344   3314   2871   -116   -474    371       C  
ATOM   1932  CD  GLU C  51     -13.264  -2.244  10.160  1.00 26.66           C  
ANISOU 1932  CD  GLU C  51     3034   3772   3322     -7   -309    327       C  
ATOM   1933  OE1 GLU C  51     -14.093  -3.176  10.141  1.00 22.85           O  
ANISOU 1933  OE1 GLU C  51     2749   3188   2746     60   -335    284       O  
ATOM   1934  OE2 GLU C  51     -12.858  -1.685   9.116  1.00 29.82           O  
ANISOU 1934  OE2 GLU C  51     3370   4211   3748      5   -153    337       O  
ATOM   1935  N   SER C  52     -14.703  -5.003  14.352  1.00 17.00           N  
ANISOU 1935  N   SER C  52     2138   2349   1973     37   -871    319       N  
ATOM   1936  CA  SER C  52     -14.609  -5.943  15.470  1.00 18.75           C  
ANISOU 1936  CA  SER C  52     2396   2539   2189    103  -1009    348       C  
ATOM   1937  C   SER C  52     -14.486  -7.377  14.963  1.00 17.56           C  
ANISOU 1937  C   SER C  52     2301   2327   2043    314   -943    351       C  
ATOM   1938  O   SER C  52     -14.383  -7.613  13.766  1.00 15.36           O  
ANISOU 1938  O   SER C  52     2033   2034   1769    404   -791    329       O  
ATOM   1939  CB  SER C  52     -15.828  -5.840  16.384  1.00 15.79           C  
ANISOU 1939  CB  SER C  52     2224   2061   1715    -12  -1101    309       C  
ATOM   1940  OG  SER C  52     -16.974  -6.360  15.726  1.00 12.46           O  
ANISOU 1940  OG  SER C  52     1993   1515   1226     27  -1019    252       O  
ATOM   1941  N   SER C  53     -14.527  -8.339  15.872  1.00 15.68           N  
ANISOU 1941  N   SER C  53     2123   2041   1794    390  -1049    376       N  
ATOM   1942  CA  SER C  53     -14.386  -9.723  15.451  1.00 18.18           C  
ANISOU 1942  CA  SER C  53     2498   2288   2122    592   -980    382       C  
ATOM   1943  C   SER C  53     -15.653 -10.131  14.708  1.00 19.45           C  
ANISOU 1943  C   SER C  53     2901   2310   2178    595   -894    292       C  
ATOM   1944  O   SER C  53     -15.654 -11.087  13.932  1.00 19.39           O  
ANISOU 1944  O   SER C  53     2977   2232   2160    738   -789    270       O  
ATOM   1945  CB  SER C  53     -14.111 -10.632  16.649  1.00 22.03           C  
ANISOU 1945  CB  SER C  53     2986   2757   2627    672  -1119    441       C  
ATOM   1946  OG  SER C  53     -15.188 -10.608  17.567  1.00 25.00           O  
ANISOU 1946  OG  SER C  53     3547   3046   2905    567  -1226    405       O  
ATOM   1947  N   LYS C  54     -16.722  -9.373  14.933  1.00 15.29           N  
ANISOU 1947  N   LYS C  54     2488   1740   1584    429   -936    248       N  
ATOM   1948  CA  LYS C  54     -18.008  -9.647  14.298  1.00 20.88           C  
ANISOU 1948  CA  LYS C  54     3407   2317   2211    403   -884    180       C  
ATOM   1949  C   LYS C  54     -18.256  -8.780  13.055  1.00 15.80           C  
ANISOU 1949  C   LYS C  54     2763   1697   1543    329   -774    145       C  
ATOM   1950  O   LYS C  54     -18.845  -9.241  12.084  1.00 20.01           O  
ANISOU 1950  O   LYS C  54     3436   2146   2020    367   -702     99       O  
ATOM   1951  CB  LYS C  54     -19.152  -9.444  15.294  1.00 25.49           C  
ANISOU 1951  CB  LYS C  54     4122   2812   2752    279   -985    170       C  
ATOM   1952  CG  LYS C  54     -20.526  -9.844  14.744  1.00 25.95           C  
ANISOU 1952  CG  LYS C  54     4381   2721   2757    253   -952    120       C  
ATOM   1953  CD  LYS C  54     -21.646  -9.384  15.669  1.00 24.43           C  
ANISOU 1953  CD  LYS C  54     4257   2411   2616     92   -963     76       C  
ATOM   1954  CE  LYS C  54     -23.025  -9.681  15.081  1.00 21.24           C  
ANISOU 1954  CE  LYS C  54     3993   1859   2218     36   -918      5       C  
ATOM   1955  NZ  LYS C  54     -23.362 -11.139  15.039  1.00 17.62           N  
ANISOU 1955  NZ  LYS C  54     3660   1334   1701    143   -947    -40       N  
ATOM   1956  N   ILE C  55     -17.798  -7.529  13.107  1.00 12.52           N  
ANISOU 1956  N   ILE C  55     2198   1391   1166    218   -769    168       N  
ATOM   1957  CA  ILE C  55     -18.063  -6.533  12.075  1.00 12.06           C  
ANISOU 1957  CA  ILE C  55     2133   1361   1088    128   -673    147       C  
ATOM   1958  C   ILE C  55     -16.789  -6.200  11.299  1.00 14.06           C  
ANISOU 1958  C   ILE C  55     2209   1730   1402    197   -561    174       C  
ATOM   1959  O   ILE C  55     -15.765  -5.810  11.879  1.00 12.42           O  
ANISOU 1959  O   ILE C  55     1807   1629   1283    191   -596    226       O  
ATOM   1960  CB  ILE C  55     -18.593  -5.210  12.702  1.00 17.19           C  
ANISOU 1960  CB  ILE C  55     2755   2033   1744    -68   -726    155       C  
ATOM   1961  CG1 ILE C  55     -19.955  -5.424  13.378  1.00 15.17           C  
ANISOU 1961  CG1 ILE C  55     2676   1644   1442   -141   -800    138       C  
ATOM   1962  CG2 ILE C  55     -18.681  -4.106  11.651  1.00 18.35           C  
ANISOU 1962  CG2 ILE C  55     2861   2223   1887   -153   -620    149       C  
ATOM   1963  CD1 ILE C  55     -21.112  -5.658  12.395  1.00 13.68           C  
ANISOU 1963  CD1 ILE C  55     2641   1338   1220   -152   -739    105       C  
ATOM   1964  N   HIS C  56     -16.854  -6.321   9.981  1.00 14.10           N  
ANISOU 1964  N   HIS C  56     2286   1709   1361    254   -427    146       N  
ATOM   1965  CA  HIS C  56     -15.719  -5.936   9.153  1.00 14.74           C  
ANISOU 1965  CA  HIS C  56     2216   1885   1500    318   -288    175       C  
ATOM   1966  C   HIS C  56     -16.200  -5.181   7.925  1.00 15.47           C  
ANISOU 1966  C   HIS C  56     2392   1966   1519    250   -176    145       C  
ATOM   1967  O   HIS C  56     -16.897  -5.735   7.078  1.00 16.11           O  
ANISOU 1967  O   HIS C  56     2675   1951   1494    289   -130     99       O  
ATOM   1968  CB  HIS C  56     -14.899  -7.172   8.756  1.00 19.25           C  
ANISOU 1968  CB  HIS C  56     2784   2432   2098    529   -194    188       C  
ATOM   1969  CG  HIS C  56     -13.704  -6.861   7.909  1.00 26.09           C  
ANISOU 1969  CG  HIS C  56     3493   3378   3042    615    -22    232       C  
ATOM   1970  ND1 HIS C  56     -12.882  -5.779   8.150  1.00 29.52           N  
ANISOU 1970  ND1 HIS C  56     3684   3940   3591    538    -17    291       N  
ATOM   1971  CD2 HIS C  56     -13.187  -7.495   6.831  1.00 28.35           C  
ANISOU 1971  CD2 HIS C  56     3836   3623   3312    772    165    227       C  
ATOM   1972  CE1 HIS C  56     -11.917  -5.755   7.249  1.00 33.21           C  
ANISOU 1972  CE1 HIS C  56     4049   4444   4124    647    168    329       C  
ATOM   1973  NE2 HIS C  56     -12.074  -6.787   6.442  1.00 33.67           N  
ANISOU 1973  NE2 HIS C  56     4292   4400   4102    794    289    291       N  
ATOM   1974  N   TYR C  57     -15.852  -3.906   7.835  1.00 16.27           N  
ANISOU 1974  N   TYR C  57     2349   2161   1673    140   -141    175       N  
ATOM   1975  CA  TYR C  57     -16.157  -3.143   6.628  1.00 13.41           C  
ANISOU 1975  CA  TYR C  57     2048   1798   1248     87    -20    161       C  
ATOM   1976  C   TYR C  57     -14.866  -2.787   5.909  1.00 17.34           C  
ANISOU 1976  C   TYR C  57     2381   2387   1821    166    145    202       C  
ATOM   1977  O   TYR C  57     -13.814  -2.635   6.544  1.00 21.51           O  
ANISOU 1977  O   TYR C  57     2687   3003   2481    190    134    254       O  
ATOM   1978  CB  TYR C  57     -17.017  -1.901   6.913  1.00 12.83           C  
ANISOU 1978  CB  TYR C  57     1978   1731   1166   -107    -83    165       C  
ATOM   1979  CG  TYR C  57     -16.578  -1.070   8.089  1.00 18.09           C  
ANISOU 1979  CG  TYR C  57     2462   2476   1935   -217   -165    199       C  
ATOM   1980  CD1 TYR C  57     -15.671  -0.029   7.929  1.00 24.65           C  
ANISOU 1980  CD1 TYR C  57     3101   3413   2852   -272    -90    237       C  
ATOM   1981  CD2 TYR C  57     -17.078  -1.319   9.361  1.00 16.02           C  
ANISOU 1981  CD2 TYR C  57     2235   2172   1678   -273   -316    193       C  
ATOM   1982  CE1 TYR C  57     -15.265   0.739   9.016  1.00 27.21           C  
ANISOU 1982  CE1 TYR C  57     3276   3800   3260   -391   -180    263       C  
ATOM   1983  CE2 TYR C  57     -16.676  -0.574  10.449  1.00 16.06           C  
ANISOU 1983  CE2 TYR C  57     2111   2238   1752   -383   -397    218       C  
ATOM   1984  CZ  TYR C  57     -15.768   0.462  10.269  1.00 23.40           C  
ANISOU 1984  CZ  TYR C  57     2854   3274   2762   -448   -337    251       C  
ATOM   1985  OH  TYR C  57     -15.371   1.220  11.351  1.00 25.04           O  
ANISOU 1985  OH  TYR C  57     2951   3534   3029   -577   -432    271       O  
ATOM   1986  N   THR C  58     -14.944  -2.687   4.585  1.00 16.58           N  
ANISOU 1986  N   THR C  58     2398   2261   1641    205    296    185       N  
ATOM   1987  CA  THR C  58     -13.775  -2.391   3.764  1.00 19.99           C  
ANISOU 1987  CA  THR C  58     2702   2757   2135    293    492    225       C  
ATOM   1988  C   THR C  58     -14.119  -1.367   2.702  1.00 16.64           C  
ANISOU 1988  C   THR C  58     2346   2340   1636    208    602    223       C  
ATOM   1989  O   THR C  58     -15.279  -1.083   2.455  1.00 16.98           O  
ANISOU 1989  O   THR C  58     2560   2327   1566    105    529    190       O  
ATOM   1990  CB  THR C  58     -13.257  -3.649   3.044  1.00 28.41           C  
ANISOU 1990  CB  THR C  58     3877   3755   3162    498    632    212       C  
ATOM   1991  OG1 THR C  58     -14.276  -4.143   2.165  1.00 30.56           O  
ANISOU 1991  OG1 THR C  58     4457   3910   3243    503    646    143       O  
ATOM   1992  CG2 THR C  58     -12.889  -4.727   4.045  1.00 32.46           C  
ANISOU 1992  CG2 THR C  58     4325   4254   3756    601    536    225       C  
ATOM   1993  N   ASN C  59     -13.096  -0.841   2.046  1.00 20.88           N  
ANISOU 1993  N   ASN C  59     2746   2941   2245    257    783    269       N  
ATOM   1994  CA  ASN C  59     -13.276   0.189   1.037  1.00 20.65           C  
ANISOU 1994  CA  ASN C  59     2764   2926   2156    184    906    279       C  
ATOM   1995  C   ASN C  59     -12.249  -0.072  -0.043  1.00 23.06           C  
ANISOU 1995  C   ASN C  59     3062   3230   2470    339   1157    307       C  
ATOM   1996  O   ASN C  59     -11.052   0.028   0.198  1.00 23.32           O  
ANISOU 1996  O   ASN C  59     2854   3332   2674    408   1252    368       O  
ATOM   1997  CB  ASN C  59     -13.076   1.570   1.660  1.00 24.65           C  
ANISOU 1997  CB  ASN C  59     3048   3531   2788     23    860    324       C  
ATOM   1998  CG  ASN C  59     -13.239   2.707   0.657  1.00 32.24           C  
ANISOU 1998  CG  ASN C  59     4041   4506   3700    -54    995    345       C  
ATOM   1999  OD1 ASN C  59     -13.176   2.509  -0.559  1.00 33.21           O  
ANISOU 1999  OD1 ASN C  59     4313   4588   3718     32   1155    341       O  
ATOM   2000  ND2 ASN C  59     -13.434   3.913   1.172  1.00 33.96           N  
ANISOU 2000  ND2 ASN C  59     4134   4778   3992   -217    937    370       N  
ATOM   2001  N   THR C  60     -12.716  -0.443  -1.226  1.00 24.99           N  
ANISOU 2001  N   THR C  60     3578   3385   2532    396   1264    267       N  
ATOM   2002  CA  THR C  60     -11.818  -0.778  -2.320  1.00 31.52           C  
ANISOU 2002  CA  THR C  60     4459   4182   3336    555   1530    286       C  
ATOM   2003  C   THR C  60     -12.085   0.148  -3.484  1.00 29.86           C  
ANISOU 2003  C   THR C  60     4375   3965   3006    492   1660    295       C  
ATOM   2004  O   THR C  60     -12.972  -0.110  -4.296  1.00 31.68           O  
ANISOU 2004  O   THR C  60     4908   4108   3022    473   1644    245       O  
ATOM   2005  CB  THR C  60     -12.015  -2.228  -2.787  1.00 33.69           C  
ANISOU 2005  CB  THR C  60     5001   4329   3470    704   1574    226       C  
ATOM   2006  OG1 THR C  60     -11.910  -3.109  -1.662  1.00 39.16           O  
ANISOU 2006  OG1 THR C  60     5596   5020   4264    756   1433    219       O  
ATOM   2007  CG2 THR C  60     -10.974  -2.600  -3.821  1.00 36.32           C  
ANISOU 2007  CG2 THR C  60     5384   4619   3799    883   1881    252       C  
ATOM   2008  N   SER C  61     -11.322   1.231  -3.550  1.00 31.50           N  
ANISOU 2008  N   SER C  61     4350   4263   3353    452   1779    364       N  
ATOM   2009  CA  SER C  61     -11.484   2.226  -4.606  1.00 32.40           C  
ANISOU 2009  CA  SER C  61     4555   4380   3375    391   1916    387       C  
ATOM   2010  C   SER C  61     -12.948   2.592  -4.835  1.00 32.06           C  
ANISOU 2010  C   SER C  61     4738   4296   3149    245   1743    347       C  
ATOM   2011  O   SER C  61     -13.388   2.748  -5.976  1.00 35.15           O  
ANISOU 2011  O   SER C  61     5371   4629   3356    244   1828    340       O  
ATOM   2012  CB  SER C  61     -10.866   1.725  -5.909  1.00 36.63           C  
ANISOU 2012  CB  SER C  61     5272   4840   3804    557   2198    391       C  
ATOM   2013  OG  SER C  61      -9.523   1.328  -5.698  1.00 40.51           O  
ANISOU 2013  OG  SER C  61     5541   5358   4492    707   2372    444       O  
ATOM   2014  N   GLY C  62     -13.697   2.724  -3.747  1.00 26.81           N  
ANISOU 2014  N   GLY C  62     3997   3654   2537    123   1502    331       N  
ATOM   2015  CA  GLY C  62     -15.082   3.145  -3.825  1.00 26.13           C  
ANISOU 2015  CA  GLY C  62     4071   3528   2329    -21   1336    316       C  
ATOM   2016  C   GLY C  62     -16.106   2.041  -3.605  1.00 24.89           C  
ANISOU 2016  C   GLY C  62     4132   3276   2049    -15   1150    254       C  
ATOM   2017  O   GLY C  62     -17.279   2.323  -3.370  1.00 21.35           O  
ANISOU 2017  O   GLY C  62     3763   2797   1554   -141    978    254       O  
ATOM   2018  N   VAL C  63     -15.680   0.783  -3.713  1.00 24.45           N  
ANISOU 2018  N   VAL C  63     4176   3163   1949    133   1196    208       N  
ATOM   2019  CA  VAL C  63     -16.582  -0.331  -3.446  1.00 20.09           C  
ANISOU 2019  CA  VAL C  63     3822   2514   1296    141   1024    147       C  
ATOM   2020  C   VAL C  63     -16.586  -0.562  -1.942  1.00 18.74           C  
ANISOU 2020  C   VAL C  63     3450   2381   1288    114    867    147       C  
ATOM   2021  O   VAL C  63     -15.568  -0.925  -1.364  1.00 20.15           O  
ANISOU 2021  O   VAL C  63     3452   2606   1596    212    929    158       O  
ATOM   2022  CB  VAL C  63     -16.152  -1.624  -4.183  1.00 20.65           C  
ANISOU 2022  CB  VAL C  63     4112   2490   1244    311   1148     94       C  
ATOM   2023  CG1 VAL C  63     -17.086  -2.790  -3.827  1.00 18.75           C  
ANISOU 2023  CG1 VAL C  63     4067   2142    914    310    962     29       C  
ATOM   2024  CG2 VAL C  63     -16.097  -1.393  -5.705  1.00 20.92           C  
ANISOU 2024  CG2 VAL C  63     4384   2475   1091    340   1321     93       C  
ATOM   2025  N   LEU C  64     -17.721  -0.322  -1.302  1.00 14.74           N  
ANISOU 2025  N   LEU C  64     2967   1852    782    -21    668    144       N  
ATOM   2026  CA  LEU C  64     -17.793  -0.449   0.148  1.00 13.35           C  
ANISOU 2026  CA  LEU C  64     2626   1702    743    -60    525    146       C  
ATOM   2027  C   LEU C  64     -18.496  -1.743   0.519  1.00 18.21           C  
ANISOU 2027  C   LEU C  64     3410   2214   1295    -14    390     94       C  
ATOM   2028  O   LEU C  64     -19.579  -2.028   0.014  1.00 19.06           O  
ANISOU 2028  O   LEU C  64     3729   2231   1282    -66    304     73       O  
ATOM   2029  CB  LEU C  64     -18.566   0.733   0.731  1.00 12.84           C  
ANISOU 2029  CB  LEU C  64     2470   1668    742   -238    421    185       C  
ATOM   2030  CG  LEU C  64     -18.171   2.111   0.184  1.00 13.98           C  
ANISOU 2030  CG  LEU C  64     2499   1890    922   -311    548    237       C  
ATOM   2031  CD1 LEU C  64     -18.990   3.205   0.849  1.00 12.14           C  
ANISOU 2031  CD1 LEU C  64     2190   1665    758   -482    452    275       C  
ATOM   2032  CD2 LEU C  64     -16.670   2.353   0.367  1.00 17.35           C  
ANISOU 2032  CD2 LEU C  64     2703   2416   1475   -236    688    257       C  
ATOM   2033  N   THR C  65     -17.893  -2.526   1.406  1.00 14.74           N  
ANISOU 2033  N   THR C  65     2873   1785    943     78    363     81       N  
ATOM   2034  CA  THR C  65     -18.549  -3.736   1.873  1.00 16.50           C  
ANISOU 2034  CA  THR C  65     3243   1906   1122    119    238     36       C  
ATOM   2035  C   THR C  65     -18.613  -3.748   3.399  1.00 18.88           C  
ANISOU 2035  C   THR C  65     3387   2237   1551     76     99     54       C  
ATOM   2036  O   THR C  65     -17.694  -3.275   4.076  1.00 17.12           O  
ANISOU 2036  O   THR C  65     2942   2114   1450     83    124     90       O  
ATOM   2037  CB  THR C  65     -17.835  -5.009   1.375  1.00 21.74           C  
ANISOU 2037  CB  THR C  65     4014   2513   1732    306    349     -1       C  
ATOM   2038  OG1 THR C  65     -16.531  -5.095   1.956  1.00 31.19           O  
ANISOU 2038  OG1 THR C  65     4980   3795   3074    412    435     36       O  
ATOM   2039  CG2 THR C  65     -17.696  -4.988  -0.129  1.00 17.20           C  
ANISOU 2039  CG2 THR C  65     3623   1899   1014    352    508    -22       C  
ATOM   2040  N   LEU C  66     -19.724  -4.248   3.930  1.00 14.92           N  
ANISOU 2040  N   LEU C  66     3008   1643   1019     21    -50     33       N  
ATOM   2041  CA  LEU C  66     -19.857  -4.464   5.358  1.00 13.56           C  
ANISOU 2041  CA  LEU C  66     2742   1471    940     -4   -173     44       C  
ATOM   2042  C   LEU C  66     -20.210  -5.926   5.562  1.00 16.31           C  
ANISOU 2042  C   LEU C  66     3246   1708   1242     97   -235      3       C  
ATOM   2043  O   LEU C  66     -21.227  -6.401   5.052  1.00 19.12           O  
ANISOU 2043  O   LEU C  66     3799   1954   1511     66   -288    -27       O  
ATOM   2044  CB  LEU C  66     -20.973  -3.603   5.947  1.00 10.76           C  
ANISOU 2044  CB  LEU C  66     2386   1090    614   -175   -279     70       C  
ATOM   2045  CG  LEU C  66     -21.322  -3.921   7.408  1.00 14.82           C  
ANISOU 2045  CG  LEU C  66     2867   1568   1195   -204   -401     76       C  
ATOM   2046  CD1 LEU C  66     -20.227  -3.457   8.352  1.00 10.65           C  
ANISOU 2046  CD1 LEU C  66     2136   1152    759   -201   -398    101       C  
ATOM   2047  CD2 LEU C  66     -22.664  -3.277   7.826  1.00 13.17           C  
ANISOU 2047  CD2 LEU C  66     2694   1261   1048   -357   -463    101       C  
ATOM   2048  N  AGLU C  67     -19.360  -6.631   6.299  0.49 14.86           N  
ANISOU 2048  N  AGLU C  67     2970   1551   1125    212   -233      8       N  
ATOM   2049  N  BGLU C  67     -19.377  -6.635   6.314  0.51 14.76           N  
ANISOU 2049  N  BGLU C  67     2959   1538   1113    211   -236      8       N  
ATOM   2050  CA AGLU C  67     -19.607  -8.020   6.640  0.49 16.63           C  
ANISOU 2050  CA AGLU C  67     3324   1671   1323    315   -285    -24       C  
ATOM   2051  CA BGLU C  67     -19.610  -8.042   6.611  0.51 16.68           C  
ANISOU 2051  CA BGLU C  67     3335   1674   1327    317   -283    -25       C  
ATOM   2052  C  AGLU C  67     -20.087  -8.095   8.077  0.49 16.31           C  
ANISOU 2052  C  AGLU C  67     3235   1612   1350    255   -431     -3       C  
ATOM   2053  C  BGLU C  67     -20.020  -8.186   8.071  0.51 16.41           C  
ANISOU 2053  C  BGLU C  67     3249   1624   1363    269   -427     -4       C  
ATOM   2054  O  AGLU C  67     -19.547  -7.422   8.955  0.49 15.19           O  
ANISOU 2054  O  AGLU C  67     2916   1565   1291    212   -465     39       O  
ATOM   2055  O  BGLU C  67     -19.365  -7.644   8.962  0.51 15.92           O  
ANISOU 2055  O  BGLU C  67     3004   1657   1386    247   -457     38       O  
ATOM   2056  CB AGLU C  67     -18.331  -8.853   6.471  0.49 19.37           C  
ANISOU 2056  CB AGLU C  67     3611   2044   1703    504   -170    -19       C  
ATOM   2057  CB BGLU C  67     -18.346  -8.863   6.328  0.51 19.28           C  
ANISOU 2057  CB BGLU C  67     3615   2028   1681    507   -158    -23       C  
ATOM   2058  CG AGLU C  67     -18.477 -10.315   6.885  0.49 21.37           C  
ANISOU 2058  CG AGLU C  67     3988   2188   1943    626   -209    -44       C  
ATOM   2059  CG BGLU C  67     -18.481 -10.366   6.572  0.51 21.27           C  
ANISOU 2059  CG BGLU C  67     4011   2164   1908    636   -180    -54       C  
ATOM   2060  CD AGLU C  67     -17.218 -11.125   6.629  0.49 25.07           C  
ANISOU 2060  CD AGLU C  67     4398   2671   2457    824    -69    -26       C  
ATOM   2061  CD BGLU C  67     -19.123 -11.107   5.409  0.51 23.16           C  
ANISOU 2061  CD BGLU C  67     4526   2269   2006    666   -126   -123       C  
ATOM   2062  OE1AGLU C  67     -16.217 -10.941   7.355  0.49 25.37           O  
ANISOU 2062  OE1AGLU C  67     4207   2812   2622    878    -69     40       O  
ATOM   2063  OE1BGLU C  67     -18.991 -10.652   4.253  0.51 24.22           O  
ANISOU 2063  OE1BGLU C  67     4728   2415   2061    653    -18   -140       O  
ATOM   2064  OE2AGLU C  67     -17.228 -11.950   5.694  0.49 32.52           O  
ANISOU 2064  OE2AGLU C  67     5529   3515   3313    925     42    -73       O  
ATOM   2065  OE2BGLU C  67     -19.762 -12.154   5.654  0.51 24.22           O  
ANISOU 2065  OE2BGLU C  67     4821   2278   2102    698   -195   -159       O  
ATOM   2066  N   ILE C  68     -21.116  -8.902   8.309  1.00 13.94           N  
ANISOU 2066  N   ILE C  68     2444   1414   1439   -133   -312   -243       N  
ATOM   2067  CA  ILE C  68     -21.596  -9.158   9.655  1.00 14.27           C  
ANISOU 2067  CA  ILE C  68     2404   1440   1578   -169   -247   -183       C  
ATOM   2068  C   ILE C  68     -21.556 -10.671   9.848  1.00 14.57           C  
ANISOU 2068  C   ILE C  68     2462   1408   1667   -174   -299   -184       C  
ATOM   2069  O   ILE C  68     -22.250 -11.403   9.133  1.00 13.83           O  
ANISOU 2069  O   ILE C  68     2381   1226   1650   -194   -419   -200       O  
ATOM   2070  CB  ILE C  68     -23.052  -8.671   9.834  1.00 16.85           C  
ANISOU 2070  CB  ILE C  68     2639   1733   2031   -213   -269   -122       C  
ATOM   2071  CG1 ILE C  68     -23.198  -7.219   9.372  1.00 17.96           C  
ANISOU 2071  CG1 ILE C  68     2772   1919   2134   -202   -242   -125       C  
ATOM   2072  CG2 ILE C  68     -23.500  -8.852  11.290  1.00 16.51           C  
ANISOU 2072  CG2 ILE C  68     2500   1702   2070   -233   -186    -47       C  
ATOM   2073  CD1 ILE C  68     -24.601  -6.858   8.925  1.00 19.93           C  
ANISOU 2073  CD1 ILE C  68     2962   2127   2483   -231   -309    -84       C  
ATOM   2074  N   LEU C  69     -20.738 -11.152  10.785  1.00 12.73           N  
ANISOU 2074  N   LEU C  69     2229   1210   1397   -153   -217   -171       N  
ATOM   2075  CA  LEU C  69     -20.594 -12.606  10.975  1.00 12.62           C  
ANISOU 2075  CA  LEU C  69     2239   1122   1436   -150   -260   -165       C  
ATOM   2076  C   LEU C  69     -21.610 -13.155  11.978  1.00 14.23           C  
ANISOU 2076  C   LEU C  69     2336   1271   1799   -198   -246    -63       C  
ATOM   2077  O   LEU C  69     -21.971 -12.475  12.937  1.00 16.60           O  
ANISOU 2077  O   LEU C  69     2548   1640   2120   -208   -153      2       O  
ATOM   2078  CB  LEU C  69     -19.177 -12.983  11.445  1.00 11.85           C  
ANISOU 2078  CB  LEU C  69     2193   1092   1217    -94   -180   -189       C  
ATOM   2079  CG  LEU C  69     -17.933 -12.629  10.619  1.00 13.29           C  
ANISOU 2079  CG  LEU C  69     2471   1347   1232    -36   -176   -268       C  
ATOM   2080  CD1 LEU C  69     -16.672 -13.143  11.328  1.00 12.39           C  
ANISOU 2080  CD1 LEU C  69     2360   1296   1052     15    -87   -237       C  
ATOM   2081  CD2 LEU C  69     -18.018 -13.231   9.234  1.00 16.38           C  
ANISOU 2081  CD2 LEU C  69     2936   1670   1617     -6   -307   -321       C  
ATOM   2082  N   ASP C  70     -22.073 -14.381  11.740  1.00 16.01           N  
ANISOU 2082  N   ASP C  70     2566   1375   2142   -224   -341    -49       N  
ATOM   2083  CA  ASP C  70     -22.895 -15.112  12.709  1.00 17.50           C  
ANISOU 2083  CA  ASP C  70     2650   1507   2493   -268   -326     68       C  
ATOM   2084  C   ASP C  70     -24.085 -14.272  13.141  1.00 15.29           C  
ANISOU 2084  C   ASP C  70     2253   1262   2293   -310   -298    149       C  
ATOM   2085  O   ASP C  70     -24.223 -13.940  14.321  1.00 15.23           O  
ANISOU 2085  O   ASP C  70     2155   1340   2292   -300   -184    237       O  
ATOM   2086  CB  ASP C  70     -22.053 -15.475  13.933  1.00 13.84           C  
ANISOU 2086  CB  ASP C  70     2163   1117   1981   -226   -198    127       C  
ATOM   2087  CG  ASP C  70     -22.659 -16.591  14.767  1.00 16.26           C  
ANISOU 2087  CG  ASP C  70     2380   1347   2453   -256   -195    253       C  
ATOM   2088  OD1 ASP C  70     -23.846 -16.935  14.582  1.00 17.22           O  
ANISOU 2088  OD1 ASP C  70     2434   1369   2741   -321   -278    313       O  
ATOM   2089  OD2 ASP C  70     -21.921 -17.116  15.625  1.00 16.90           O  
ANISOU 2089  OD2 ASP C  70     2452   1473   2497   -213   -108    301       O  
ATOM   2090  N   CYS C  71     -24.940 -13.938  12.177  1.00 16.43           N  
ANISOU 2090  N   CYS C  71     2398   1353   2490   -348   -403    117       N  
ATOM   2091  CA  CYS C  71     -26.103 -13.083  12.419  1.00 12.81           C  
ANISOU 2091  CA  CYS C  71     1836    930   2101   -381   -388    186       C  
ATOM   2092  C   CYS C  71     -27.089 -13.674  13.421  1.00 13.05           C  
ANISOU 2092  C   CYS C  71     1731    933   2296   -424   -365    330       C  
ATOM   2093  O   CYS C  71     -27.558 -14.815  13.272  1.00 16.74           O  
ANISOU 2093  O   CYS C  71     2174   1281   2906   -474   -455    371       O  
ATOM   2094  CB  CYS C  71     -26.829 -12.776  11.097  1.00 13.83           C  
ANISOU 2094  CB  CYS C  71     1992   1003   2258   -410   -520    126       C  
ATOM   2095  SG  CYS C  71     -25.866 -11.798   9.914  1.00 16.18           S  
ANISOU 2095  SG  CYS C  71     2419   1367   2363   -350   -530     -6       S  
ATOM   2096  N   HIS C  72     -27.400 -12.881  14.441  1.00 17.09           N  
ANISOU 2096  N   HIS C  72     2148   1556   2788   -401   -247    409       N  
ATOM   2097  CA  HIS C  72     -28.448 -13.202  15.403  1.00 16.02           C  
ANISOU 2097  CA  HIS C  72     1863   1434   2791   -428   -211    564       C  
ATOM   2098  C   HIS C  72     -29.579 -12.199  15.189  1.00 16.38           C  
ANISOU 2098  C   HIS C  72     1835   1516   2872   -443   -226    593       C  
ATOM   2099  O   HIS C  72     -29.438 -11.248  14.409  1.00 14.29           O  
ANISOU 2099  O   HIS C  72     1639   1271   2520   -427   -248    496       O  
ATOM   2100  CB  HIS C  72     -27.920 -13.097  16.835  1.00 14.46           C  
ANISOU 2100  CB  HIS C  72     1605   1363   2526   -365    -56    635       C  
ATOM   2101  CG  HIS C  72     -26.980 -14.198  17.226  1.00 16.46           C  
ANISOU 2101  CG  HIS C  72     1899   1587   2768   -348    -31    647       C  
ATOM   2102  ND1 HIS C  72     -25.834 -14.493  16.519  1.00 19.44           N  
ANISOU 2102  ND1 HIS C  72     2418   1920   3050   -331    -68    523       N  
ATOM   2103  CD2 HIS C  72     -27.003 -15.065  18.270  1.00 17.47           C  
ANISOU 2103  CD2 HIS C  72     1940   1734   2965   -335     33    779       C  
ATOM   2104  CE1 HIS C  72     -25.204 -15.503  17.094  1.00 20.99           C  
ANISOU 2104  CE1 HIS C  72     2617   2099   3258   -310    -32    570       C  
ATOM   2105  NE2 HIS C  72     -25.902 -15.871  18.159  1.00 17.53           N  
ANISOU 2105  NE2 HIS C  72     2040   1695   2924   -314     30    729       N  
ATOM   2106  N   THR C  73     -30.690 -12.405  15.887  1.00 15.03           N  
ANISOU 2106  N   THR C  73     1519   1362   2830   -468   -208    737       N  
ATOM   2107  CA  THR C  73     -31.866 -11.553  15.739  1.00 17.77           C  
ANISOU 2107  CA  THR C  73     1780   1748   3223   -478   -223    783       C  
ATOM   2108  C   THR C  73     -31.591 -10.067  15.998  1.00 17.82           C  
ANISOU 2108  C   THR C  73     1808   1877   3084   -402   -125    722       C  
ATOM   2109  O   THR C  73     -32.152  -9.208  15.326  1.00 18.45           O  
ANISOU 2109  O   THR C  73     1894   1958   3157   -404   -164    687       O  
ATOM   2110  CB  THR C  73     -32.979 -11.994  16.679  1.00 21.51           C  
ANISOU 2110  CB  THR C  73     2079   2255   3839   -498   -190    969       C  
ATOM   2111  OG1 THR C  73     -33.378 -13.327  16.335  1.00 30.48           O  
ANISOU 2111  OG1 THR C  73     3184   3252   5146   -585   -300   1032       O  
ATOM   2112  CG2 THR C  73     -34.173 -11.047  16.543  1.00 24.30           C  
ANISOU 2112  CG2 THR C  73     2342   2665   4225   -495   -198   1017       C  
ATOM   2113  N   ASP C  74     -30.750  -9.765  16.983  1.00 14.05           N  
ANISOU 2113  N   ASP C  74     1339   1501   2499   -333      0    709       N  
ATOM   2114  CA  ASP C  74     -30.411  -8.363  17.269  1.00 15.81           C  
ANISOU 2114  CA  ASP C  74     1586   1826   2597   -262     86    635       C  
ATOM   2115  C   ASP C  74     -29.574  -7.684  16.183  1.00 21.04           C  
ANISOU 2115  C   ASP C  74     2390   2443   3160   -264     43    487       C  
ATOM   2116  O   ASP C  74     -29.306  -6.479  16.260  1.00 19.47           O  
ANISOU 2116  O   ASP C  74     2217   2302   2881   -217     98    423       O  
ATOM   2117  CB  ASP C  74     -29.752  -8.216  18.644  1.00 18.83           C  
ANISOU 2117  CB  ASP C  74     1928   2337   2889   -184    221    650       C  
ATOM   2118  CG  ASP C  74     -28.471  -9.015  18.772  1.00 26.00           C  
ANISOU 2118  CG  ASP C  74     2916   3231   3730   -182    239    603       C  
ATOM   2119  OD1 ASP C  74     -28.359 -10.094  18.159  1.00 27.53           O  
ANISOU 2119  OD1 ASP C  74     3152   3317   3992   -240    157    617       O  
ATOM   2120  OD2 ASP C  74     -27.568  -8.563  19.498  1.00 28.86           O  
ANISOU 2120  OD2 ASP C  74     3299   3694   3972   -118    332    546       O  
ATOM   2121  N   ASP C  75     -29.148  -8.444  15.174  1.00 17.90           N  
ANISOU 2121  N   ASP C  75     2083   1947   2773   -312    -55    435       N  
ATOM   2122  CA  ASP C  75     -28.432  -7.838  14.050  1.00 13.26           C  
ANISOU 2122  CA  ASP C  75     1618   1330   2091   -307    -99    315       C  
ATOM   2123  C   ASP C  75     -29.400  -7.296  12.997  1.00 13.49           C  
ANISOU 2123  C   ASP C  75     1638   1316   2172   -333   -190    314       C  
ATOM   2124  O   ASP C  75     -28.982  -6.603  12.066  1.00 14.72           O  
ANISOU 2124  O   ASP C  75     1875   1464   2253   -319   -219    237       O  
ATOM   2125  CB  ASP C  75     -27.440  -8.818  13.409  1.00 12.70           C  
ANISOU 2125  CB  ASP C  75     1653   1196   1976   -321   -159    247       C  
ATOM   2126  CG  ASP C  75     -26.332  -9.244  14.365  1.00 14.32           C  
ANISOU 2126  CG  ASP C  75     1878   1456   2107   -285    -64    240       C  
ATOM   2127  OD1 ASP C  75     -25.769  -8.373  15.043  1.00 14.11           O  
ANISOU 2127  OD1 ASP C  75     1846   1524   1991   -239     39    214       O  
ATOM   2128  OD2 ASP C  75     -26.026 -10.456  14.443  1.00 14.93           O  
ANISOU 2128  OD2 ASP C  75     1973   1481   2220   -300    -95    259       O  
ATOM   2129  N   SER C  76     -30.685  -7.617  13.141  1.00 13.78           N  
ANISOU 2129  N   SER C  76     1570   1331   2336   -368   -234    409       N  
ATOM   2130  CA  SER C  76     -31.711  -7.094  12.238  1.00 14.70           C  
ANISOU 2130  CA  SER C  76     1658   1423   2505   -389   -316    421       C  
ATOM   2131  C   SER C  76     -31.791  -5.580  12.381  1.00 18.13           C  
ANISOU 2131  C   SER C  76     2086   1928   2873   -331   -236    406       C  
ATOM   2132  O   SER C  76     -31.284  -5.002  13.351  1.00 15.90           O  
ANISOU 2132  O   SER C  76     1795   1714   2533   -281   -121    398       O  
ATOM   2133  CB  SER C  76     -33.084  -7.718  12.538  1.00 14.30           C  
ANISOU 2133  CB  SER C  76     1474   1350   2610   -439   -367    543       C  
ATOM   2134  OG  SER C  76     -33.048  -9.132  12.386  1.00 17.48           O  
ANISOU 2134  OG  SER C  76     1878   1662   3101   -500   -452    558       O  
ATOM   2135  N   GLY C  77     -32.432  -4.932  11.422  1.00 16.25           N  
ANISOU 2135  N   GLY C  77     1851   1674   2648   -334   -300    399       N  
ATOM   2136  CA  GLY C  77     -32.615  -3.500  11.512  1.00 16.28           C  
ANISOU 2136  CA  GLY C  77     1845   1729   2613   -279   -231    395       C  
ATOM   2137  C   GLY C  77     -32.020  -2.750  10.343  1.00 18.38           C  
ANISOU 2137  C   GLY C  77     2211   1974   2799   -261   -264    319       C  
ATOM   2138  O   GLY C  77     -31.768  -3.319   9.272  1.00 17.17           O  
ANISOU 2138  O   GLY C  77     2120   1780   2622   -287   -361    278       O  
ATOM   2139  N   THR C  78     -31.803  -1.458  10.561  1.00 14.09           N  
ANISOU 2139  N   THR C  78     1678   1461   2216   -209   -183    302       N  
ATOM   2140  CA  THR C  78     -31.397  -0.547   9.511  1.00 16.26           C  
ANISOU 2140  CA  THR C  78     2022   1720   2435   -186   -200    263       C  
ATOM   2141  C   THR C  78     -29.903  -0.314   9.539  1.00 15.14           C  
ANISOU 2141  C   THR C  78     1974   1579   2198   -173   -147    187       C  
ATOM   2142  O   THR C  78     -29.343   0.088  10.559  1.00 14.71           O  
ANISOU 2142  O   THR C  78     1915   1549   2125   -151    -53    160       O  
ATOM   2143  CB  THR C  78     -32.104   0.807   9.671  1.00 17.36           C  
ANISOU 2143  CB  THR C  78     2112   1873   2611   -138   -149    301       C  
ATOM   2144  OG1 THR C  78     -33.521   0.605   9.612  1.00 16.32           O  
ANISOU 2144  OG1 THR C  78     1885   1753   2563   -146   -199    381       O  
ATOM   2145  CG2 THR C  78     -31.672   1.777   8.578  1.00 20.19           C  
ANISOU 2145  CG2 THR C  78     2537   2211   2925   -112   -161    281       C  
ATOM   2146  N   TYR C  79     -29.260  -0.570   8.409  1.00 13.63           N  
ANISOU 2146  N   TYR C  79     1862   1374   1942   -180   -209    151       N  
ATOM   2147  CA  TYR C  79     -27.853  -0.258   8.249  1.00 11.35           C  
ANISOU 2147  CA  TYR C  79     1656   1097   1560   -165   -163     95       C  
ATOM   2148  C   TYR C  79     -27.739   0.949   7.342  1.00 13.79           C  
ANISOU 2148  C   TYR C  79     1988   1402   1848   -134   -158    111       C  
ATOM   2149  O   TYR C  79     -28.422   1.034   6.323  1.00 13.65           O  
ANISOU 2149  O   TYR C  79     1963   1384   1839   -124   -232    146       O  
ATOM   2150  CB  TYR C  79     -27.098  -1.467   7.688  1.00 11.06           C  
ANISOU 2150  CB  TYR C  79     1688   1060   1453   -181   -227     50       C  
ATOM   2151  CG  TYR C  79     -26.981  -2.561   8.721  1.00 15.36           C  
ANISOU 2151  CG  TYR C  79     2213   1600   2022   -207   -209     41       C  
ATOM   2152  CD1 TYR C  79     -25.879  -2.623   9.567  1.00 13.60           C  
ANISOU 2152  CD1 TYR C  79     2018   1408   1743   -197   -124      3       C  
ATOM   2153  CD2 TYR C  79     -27.995  -3.506   8.883  1.00 17.47           C  
ANISOU 2153  CD2 TYR C  79     2424   1837   2378   -240   -274     80       C  
ATOM   2154  CE1 TYR C  79     -25.775  -3.609  10.534  1.00 11.72           C  
ANISOU 2154  CE1 TYR C  79     1754   1176   1523   -211   -100      9       C  
ATOM   2155  CE2 TYR C  79     -27.903  -4.505   9.847  1.00 16.22           C  
ANISOU 2155  CE2 TYR C  79     2237   1673   2254   -262   -251     93       C  
ATOM   2156  CZ  TYR C  79     -26.790  -4.542  10.671  1.00 12.42           C  
ANISOU 2156  CZ  TYR C  79     1786   1229   1704   -242   -161     60       C  
ATOM   2157  OH  TYR C  79     -26.686  -5.510  11.635  1.00 14.14           O  
ANISOU 2157  OH  TYR C  79     1970   1451   1950   -254   -131     86       O  
ATOM   2158  N   ARG C  80     -26.885   1.886   7.732  1.00 14.14           N  
ANISOU 2158  N   ARG C  80     2054   1447   1872   -118    -74     89       N  
ATOM   2159  CA  ARG C  80     -26.678   3.111   6.988  1.00 13.14           C  
ANISOU 2159  CA  ARG C  80     1943   1305   1745    -91    -56    119       C  
ATOM   2160  C   ARG C  80     -25.200   3.334   6.704  1.00 12.45           C  
ANISOU 2160  C   ARG C  80     1919   1232   1579    -91    -20     89       C  
ATOM   2161  O   ARG C  80     -24.363   3.271   7.611  1.00 13.27           O  
ANISOU 2161  O   ARG C  80     2034   1342   1665   -106     40     36       O  
ATOM   2162  CB  ARG C  80     -27.225   4.315   7.769  1.00 13.08           C  
ANISOU 2162  CB  ARG C  80     1881   1262   1827    -70     13    133       C  
ATOM   2163  CG  ARG C  80     -27.091   5.651   7.021  1.00 13.35           C  
ANISOU 2163  CG  ARG C  80     1925   1259   1890    -43     33    177       C  
ATOM   2164  CD  ARG C  80     -27.578   6.818   7.887  1.00 13.69           C  
ANISOU 2164  CD  ARG C  80     1921   1251   2030    -15     99    173       C  
ATOM   2165  NE  ARG C  80     -27.538   8.095   7.174  1.00 11.72           N  
ANISOU 2165  NE  ARG C  80     1675    946   1831     11    116    227       N  
ATOM   2166  CZ  ARG C  80     -27.235   9.250   7.750  1.00 14.02           C  
ANISOU 2166  CZ  ARG C  80     1959   1170   2197     26    178    202       C  
ATOM   2167  NH1 ARG C  80     -26.954   9.280   9.051  1.00 13.71           N  
ANISOU 2167  NH1 ARG C  80     1910   1126   2175     24    225    112       N  
ATOM   2168  NH2 ARG C  80     -27.209  10.379   7.033  1.00 13.23           N  
ANISOU 2168  NH2 ARG C  80     1859   1007   2159     48    190    266       N  
ATOM   2169  N   ALA C  81     -24.885   3.595   5.440  1.00 10.73           N  
ANISOU 2169  N   ALA C  81     1734   1032   1310    -70    -57    128       N  
ATOM   2170  CA  ALA C  81     -23.529   3.956   5.041  1.00 10.54           C  
ANISOU 2170  CA  ALA C  81     1755   1031   1217    -64    -20    127       C  
ATOM   2171  C   ALA C  81     -23.583   5.419   4.675  1.00 12.09           C  
ANISOU 2171  C   ALA C  81     1926   1187   1479    -48     22    194       C  
ATOM   2172  O   ALA C  81     -24.435   5.829   3.894  1.00 13.05           O  
ANISOU 2172  O   ALA C  81     2025   1305   1630    -18    -15    260       O  
ATOM   2173  CB  ALA C  81     -23.069   3.129   3.851  1.00  9.42           C  
ANISOU 2173  CB  ALA C  81     1665    956    959    -38    -90    134       C  
ATOM   2174  N   VAL C  82     -22.687   6.212   5.247  1.00 13.00           N  
ANISOU 2174  N   VAL C  82     2041   1270   1627    -66     95    179       N  
ATOM   2175  CA  VAL C  82     -22.677   7.644   4.981  1.00 11.99           C  
ANISOU 2175  CA  VAL C  82     1887   1080   1589    -57    135    242       C  
ATOM   2176  C   VAL C  82     -21.330   7.993   4.375  1.00 13.67           C  
ANISOU 2176  C   VAL C  82     2123   1318   1754    -64    162    283       C  
ATOM   2177  O   VAL C  82     -20.291   7.670   4.952  1.00 10.10           O  
ANISOU 2177  O   VAL C  82     1690    888   1259    -95    193    224       O  
ATOM   2178  CB  VAL C  82     -22.894   8.472   6.272  1.00 13.66           C  
ANISOU 2178  CB  VAL C  82     2065   1209   1917    -73    194    184       C  
ATOM   2179  CG1 VAL C  82     -22.858   9.975   5.965  1.00  8.77           C  
ANISOU 2179  CG1 VAL C  82     1422    501   1410    -63    229    247       C  
ATOM   2180  CG2 VAL C  82     -24.220   8.106   6.937  1.00 11.26           C  
ANISOU 2180  CG2 VAL C  82     1726    900   1651    -55    175    156       C  
ATOM   2181  N   CYS C  83     -21.354   8.622   3.198  1.00 11.85           N  
ANISOU 2181  N   CYS C  83     1882   1097   1525    -31    152    394       N  
ATOM   2182  CA  CYS C  83     -20.134   8.997   2.491  1.00 13.93           C  
ANISOU 2182  CA  CYS C  83     2151   1398   1743    -30    180    466       C  
ATOM   2183  C   CYS C  83     -20.056  10.507   2.469  1.00 14.53           C  
ANISOU 2183  C   CYS C  83     2183   1373   1964    -42    232    545       C  
ATOM   2184  O   CYS C  83     -20.999  11.170   2.051  1.00 18.17           O  
ANISOU 2184  O   CYS C  83     2617   1788   2500     -9    224    614       O  
ATOM   2185  CB  CYS C  83     -20.142   8.465   1.053  1.00 14.57           C  
ANISOU 2185  CB  CYS C  83     2247   1592   1695     33    127    547       C  
ATOM   2186  SG  CYS C  83     -20.370   6.676   0.921  1.00 16.27           S  
ANISOU 2186  SG  CYS C  83     2518   1905   1758     56     44    447       S  
ATOM   2187  N   THR C  84     -18.934  11.046   2.925  1.00 15.80           N  
ANISOU 2187  N   THR C  84     2335   1495   2173    -89    282    536       N  
ATOM   2188  CA  THR C  84     -18.806  12.488   3.097  1.00 16.35           C  
ANISOU 2188  CA  THR C  84     2362   1438   2413   -115    327    591       C  
ATOM   2189  C   THR C  84     -17.548  13.038   2.446  1.00 17.91           C  
ANISOU 2189  C   THR C  84     2534   1651   2620   -137    361    701       C  
ATOM   2190  O   THR C  84     -16.467  12.459   2.568  1.00 17.07           O  
ANISOU 2190  O   THR C  84     2442   1623   2423   -163    370    671       O  
ATOM   2191  CB  THR C  84     -18.756  12.864   4.593  1.00 15.50           C  
ANISOU 2191  CB  THR C  84     2249   1229   2412   -163    353    450       C  
ATOM   2192  OG1 THR C  84     -19.946  12.409   5.246  1.00 17.35           O  
ANISOU 2192  OG1 THR C  84     2493   1457   2642   -136    330    365       O  
ATOM   2193  CG2 THR C  84     -18.648  14.367   4.758  1.00 20.80           C  
ANISOU 2193  CG2 THR C  84     2880   1748   3275   -187    386    490       C  
ATOM   2194  N   ASN C  85     -17.692  14.158   1.748  1.00 15.52           N  
ANISOU 2194  N   ASN C  85     2188   1278   2431   -123    382    840       N  
ATOM   2195  CA  ASN C  85     -16.529  14.964   1.384  1.00 19.24           C  
ANISOU 2195  CA  ASN C  85     2614   1719   2975   -161    424    952       C  
ATOM   2196  C   ASN C  85     -16.887  16.437   1.554  1.00 22.00           C  
ANISOU 2196  C   ASN C  85     2919   1885   3556   -183    450   1012       C  
ATOM   2197  O   ASN C  85     -17.992  16.753   1.997  1.00 24.58           O
[truncated: 47,872 more chars]
