# Supplementary material
Source: publisher figshare collection journal article supplement (https://plos.figshare.com/articles/dataset/_/11411415)
Supplement: Supplementary file 1 [file 1 › pone.0226693.s017.pdb]

REMARK Modified from 3QP3 (titin M4)
REMARK sequence renumbered: original residue number -2
CRYST1   63.494   63.494  151.023  90.00  90.00  90.00 P 41 21 2    24          
ORIGX1      1.000000  0.000000  0.000000        0.00000                         
ORIGX2      0.000000  1.000000  0.000000        0.00000                         
ORIGX3      0.000000  0.000000  1.000000        0.00000                         
SCALE1      0.015750  0.000000  0.000000        0.00000                         
SCALE2      0.000000  0.015750  0.000000        0.00000                         
SCALE3      0.000000  0.000000  0.006622        0.00000 
ATOM      1  N   GLY A  -1      26.641 -13.643  15.271  1.00 51.27           N  
ATOM      2  CA  GLY A  -1      25.446 -14.009  16.009  1.00 50.55           C  
ATOM      3  C   GLY A  -1      24.178 -13.628  15.271  1.00 49.47           C  
ATOM      4  O   GLY A  -1      24.208 -12.781  14.375  1.00 49.22           O  
ATOM      5  N   PRO A   0      23.053 -14.258  15.642  1.00 49.51           N  
ATOM      6  CA  PRO A   0      21.761 -13.998  14.993  1.00 49.91           C  
ATOM      7  C   PRO A   0      21.230 -12.578  15.222  1.00 47.32           C  
ATOM      8  O   PRO A   0      20.383 -12.121  14.453  1.00 48.50           O  
ATOM      9  CB  PRO A   0      20.828 -15.043  15.624  1.00 49.83           C  
ATOM     10  CG  PRO A   0      21.494 -15.441  16.905  1.00 49.41           C  
ATOM     11  CD  PRO A   0      22.968 -15.326  16.654  1.00 49.35           C  
ATOM     12  N   PHE A   1      21.726 -11.888  16.246  1.00 44.48           N  
ATOM     13  CA  PHE A   1      21.239 -10.542  16.556  1.00 44.60           C  
ATOM     14  C   PHE A   1      22.286  -9.449  16.313  1.00 41.61           C  
ATOM     15  O   PHE A   1      22.100  -8.298  16.717  1.00 39.91           O  
ATOM     16  CB  PHE A   1      20.749 -10.464  18.005  1.00 46.00           C  
ATOM     17  CG  PHE A   1      19.877 -11.612  18.414  1.00 47.99           C  
ATOM     18  CD1 PHE A   1      18.734 -11.923  17.697  1.00 48.35           C  
ATOM     19  CD2 PHE A   1      20.195 -12.376  19.525  1.00 48.87           C  
ATOM     20  CE1 PHE A   1      17.929 -12.977  18.072  1.00 48.05           C  
ATOM     21  CE2 PHE A   1      19.393 -13.431  19.907  1.00 48.51           C  
ATOM     22  CZ  PHE A   1      18.258 -13.731  19.179  1.00 48.48           C  
ATOM     23  N   THR A   2      23.385  -9.809  15.659  1.00 39.98           N  
ATOM     24  CA  THR A   2      24.465  -8.857  15.414  1.00 37.00           C  
ATOM     25  C   THR A   2      24.032  -7.729  14.468  1.00 31.73           C  
ATOM     26  O   THR A   2      24.461  -6.582  14.623  1.00 34.43           O  
ATOM     27  CB  THR A   2      25.734  -9.561  14.867  1.00 55.26           C  
ATOM     28  N   LEU A   3      23.178  -8.054  13.500  1.00 55.67           N  
ANISOU   28  N   LEU A   3     4164   6576  10413    397    125   1229       N  
ATOM     29  CA  LEU A   3      22.711  -7.063  12.533  1.00 47.45           C  
ANISOU   29  CA  LEU A   3     3224   5612   9191    248    200   1005       C  
ATOM     30  C   LEU A   3      21.489  -6.274  13.015  1.00 40.83           C  
ANISOU   30  C   LEU A   3     2638   4789   8086    116    148    992       C  
ATOM     31  O   LEU A   3      20.993  -5.393  12.307  1.00 37.23           O  
ANISOU   31  O   LEU A   3     2287   4394   7466     -5    194    828       O  
ATOM     32  CB  LEU A   3      22.414  -7.716  11.185  1.00 46.53           C  
ANISOU   32  CB  LEU A   3     3085   5356   9238    294    415    789       C  
ATOM     33  CG  LEU A   3      23.604  -8.416  10.529  1.00 51.22           C  
ANISOU   33  CG  LEU A   3     3439   5924  10097    416    515    762       C  
ATOM     34  CD1 LEU A   3      23.170  -9.071   9.226  1.00 52.79           C  
ANISOU   34  CD1 LEU A   3     3668   5965  10426    440    742    535       C  
ATOM     35  CD2 LEU A   3      24.754  -7.436  10.302  1.00 50.45           C  
ANISOU   35  CD2 LEU A   3     3197   6047   9923    342    446    753       C  
ATOM     36  N   ASP A   4      21.005  -6.585  14.214  1.00 37.24           N  
ANISOU   36  N   ASP A   4     2286   4273   7591    141     59   1168       N  
ATOM     37  CA  ASP A   4      19.915  -5.809  14.803  1.00 30.71           C  
ANISOU   37  CA  ASP A   4     1691   3460   6516     19     17   1175       C  
ATOM     38  C   ASP A   4      20.350  -4.362  14.969  1.00 30.54           C  
ANISOU   38  C   ASP A   4     1714   3650   6240   -132    -94   1169       C  
ATOM     39  O   ASP A   4      21.494  -4.093  15.335  1.00 29.06           O  
ANISOU   39  O   ASP A   4     1399   3599   6042   -141   -212   1271       O  
ATOM     40  CB  ASP A   4      19.503  -6.377  16.158  1.00 30.70           C  
ANISOU   40  CB  ASP A   4     1790   3367   6509     66    -59   1384       C  
ATOM     41  CG  ASP A   4      18.772  -7.696  16.040  1.00 32.46           C  
ANISOU   41  CG  ASP A   4     2029   3359   6945    186     70   1376       C  
ATOM     42  OD1 ASP A   4      18.489  -8.124  14.901  1.00 35.30           O  
ANISOU   42  OD1 ASP A   4     2339   3631   7442    218    217   1195       O  
ATOM     43  OD2 ASP A   4      18.457  -8.286  17.089  1.00 30.97           O1-
ANISOU   43  OD2 ASP A   4     1921   3073   6775    235     28   1547       O1-
ATOM     44  N   HIS A   5      19.439  -3.432  14.708  1.00 26.76           N  
ANISOU   44  N   HIS A   5     1412   3195   5561   -253    -56   1053       N  
ATOM     45  CA  HIS A   5      19.759  -2.012  14.813  1.00 26.60           C  
ANISOU   45  CA  HIS A   5     1463   3353   5290   -404   -137   1032       C  
ATOM     46  C   HIS A   5      18.504  -1.205  15.104  1.00 26.28           C  
ANISOU   46  C   HIS A   5     1664   3283   5038   -505   -110    992       C  
ATOM     47  O   HIS A   5      17.389  -1.634  14.784  1.00 22.47           O  
ANISOU   47  O   HIS A   5     1258   2662   4618   -467     -5    919       O  
ATOM     48  CB  HIS A   5      20.449  -1.499  13.539  1.00 30.59           C  
ANISOU   48  CB  HIS A   5     1853   3959   5810   -446    -79    862       C  
ATOM     49  CG  HIS A   5      19.598  -1.580  12.306  1.00 34.81           C  
ANISOU   49  CG  HIS A   5     2440   4402   6383   -443     73    658       C  
ATOM     50  CD2 HIS A   5      19.484  -2.546  11.366  1.00 35.68           C  
ANISOU   50  CD2 HIS A   5     2460   4395   6703   -350    198    546       C  
ATOM     51  ND1 HIS A   5      18.731  -0.573  11.929  1.00 35.54           N  
ANISOU   51  ND1 HIS A   5     2706   4520   6278   -553    103    551       N  
ATOM     52  CE1 HIS A   5      18.116  -0.920  10.812  1.00 33.59           C  
ANISOU   52  CE1 HIS A   5     2464   4186   6113   -529    222    389       C  
ATOM     53  NE2 HIS A   5      18.556  -2.111  10.446  1.00 34.52           N  
ANISOU   53  NE2 HIS A   5     2432   4216   6469   -416    285    375       N  
ATOM     54  N   ALA A   6      18.684  -0.050  15.730  1.00 24.36           N  
ANISOU   54  N   ALA A   6     1537   3164   4553   -635   -199   1043       N  
ATOM     55  CA  ALA A   6      17.561   0.827  16.021  1.00 26.10           C  
ANISOU   55  CA  ALA A   6     1988   3358   4573   -730   -159   1008       C  
ATOM     56  C   ALA A   6      16.941   1.285  14.703  1.00 23.53           C  
ANISOU   56  C   ALA A   6     1682   3015   4244   -751    -44    805       C  
ATOM     57  O   ALA A   6      17.619   1.309  13.674  1.00 25.64           O  
ANISOU   57  O   ALA A   6     1820   3344   4579   -745    -19    695       O  
ATOM     58  CB  ALA A   6      18.028   2.027  16.853  1.00 27.95           C  
ANISOU   58  CB  ALA A   6     2344   3732   4545   -876   -266   1086       C  
ATOM     59  N   PRO A   7      15.651   1.651  14.732  1.00 21.80           N  
ANISOU   59  N   PRO A   7     1625   2712   3946   -777     29    759       N  
ATOM     60  CA  PRO A   7      14.964   2.076  13.508  1.00 20.31           C  
ANISOU   60  CA  PRO A   7     1461   2506   3750   -795    119    584       C  
ATOM     61  C   PRO A   7      15.741   3.190  12.799  1.00 22.00           C  
ANISOU   61  C   PRO A   7     1673   2868   3819   -892     96    495       C  
ATOM     62  O   PRO A   7      16.319   4.064  13.448  1.00 18.46           O  
ANISOU   62  O   PRO A   7     1294   2524   3198   -985     25    563       O  
ATOM     63  CB  PRO A   7      13.619   2.588  14.026  1.00 18.67           C  
ANISOU   63  CB  PRO A   7     1438   2219   3436   -828    167    603       C  
ATOM     64  CG  PRO A   7      13.374   1.790  15.287  1.00 21.73           C  
ANISOU   64  CG  PRO A   7     1858   2515   3883   -779    150    759       C  
ATOM     65  CD  PRO A   7      14.758   1.653  15.905  1.00 21.88           C  
ANISOU   65  CD  PRO A   7     1798   2636   3879   -789     33    874       C  
ATOM     66  N   ARG A   8      15.762   3.138  11.474  1.00 23.85           N  
ANISOU   66  N   ARG A   8     1839   3106   4118   -881    158    342       N  
ATOM     67  CA  ARG A   8      16.483   4.115  10.663  1.00 25.65           C  
ANISOU   67  CA  ARG A   8     2065   3460   4221   -971    157    244       C  
ATOM     68  C   ARG A   8      15.531   4.670   9.610  1.00 23.89           C  
ANISOU   68  C   ARG A   8     1945   3202   3931  -1000    228    105       C  
ATOM     69  O   ARG A   8      15.093   3.947   8.713  1.00 23.27           O  
ANISOU   69  O   ARG A   8     1806   3049   3984   -943    287      6       O  
ATOM     70  CB  ARG A   8      17.684   3.444   9.994  1.00 31.89           C  
ANISOU   70  CB  ARG A   8     2654   4299   5164   -931    167    196       C  
ATOM     71  CG  ARG A   8      18.443   4.309   9.007  1.00 39.69           C  
ANISOU   71  CG  ARG A   8     3628   5404   6051  -1022    193     77       C  
ATOM     72  CD  ARG A   8      19.677   3.585   8.466  1.00 46.67           C  
ANISOU   72  CD  ARG A   8     4295   6329   7109   -975    221     41       C  
ATOM     73  NE  ARG A   8      19.344   2.311   7.825  1.00 50.08           N  
ANISOU   73  NE  ARG A   8     4636   6630   7762   -858    308    -27       N  
ATOM     74  CZ  ARG A   8      19.790   1.122   8.228  1.00 51.27           C  
ANISOU   74  CZ  ARG A   8     4631   6717   8131   -742    309     51       C  
ATOM     75  NH1 ARG A   8      20.601   1.029   9.277  1.00 53.26           N1+
ANISOU   75  NH1 ARG A   8     4789   7034   8412   -722    209    212       N1+
ATOM     76  NH2 ARG A   8      19.429   0.021   7.577  1.00 49.00           N  
ANISOU   76  NH2 ARG A   8     4289   6297   8033   -650    408    -28       N  
ATOM     77  N   ILE A   9      15.189   5.944   9.729  1.00 23.34           N  
ANISOU   77  N   ILE A   9     2035   3180   3653  -1090    220    102       N  
ATOM     78  CA  ILE A   9      14.277   6.553   8.777  1.00 22.55           C  
ANISOU   78  CA  ILE A   9     2035   3050   3482  -1112    271     -7       C  
ATOM     79  C   ILE A   9      15.055   7.082   7.578  1.00 22.36           C  
ANISOU   79  C   ILE A   9     1989   3118   3390  -1176    291   -131       C  
ATOM     80  O   ILE A   9      15.810   8.053   7.706  1.00 21.49           O  
ANISOU   80  O   ILE A   9     1933   3108   3124  -1271    271   -122       O  
ATOM     81  CB  ILE A   9      13.475   7.681   9.426  1.00 24.63           C  
ANISOU   81  CB  ILE A   9     2490   3300   3568  -1164    272     51       C  
ATOM     82  CG1 ILE A   9      12.609   7.125  10.566  1.00 24.51           C  
ANISOU   82  CG1 ILE A   9     2507   3180   3625  -1103    278    164       C  
ATOM     83  CG2 ILE A   9      12.610   8.369   8.382  1.00 24.20           C  
ANISOU   83  CG2 ILE A   9     2526   3224   3447  -1178    313    -49       C  
ATOM     84  CD1 ILE A   9      11.898   8.194  11.382  1.00 22.69           C  
ANISOU   84  CD1 ILE A   9     2469   2924   3229  -1153    302    231       C  
ATOM     85  N   THR A  10      14.886   6.439   6.418  1.00 19.53           N  
ANISOU   85  N   THR A  10     1559   2721   3140  -1139    338   -251       N  
ATOM     86  CA  THR A  10      15.703   6.780   5.248  1.00 25.12           C  
ANISOU   86  CA  THR A  10     2241   3505   3796  -1200    376   -374       C  
ATOM     87  C   THR A  10      15.007   7.775   4.333  1.00 26.19           C  
ANISOU   87  C   THR A  10     2534   3649   3767  -1263    392   -459       C  
ATOM     88  O   THR A  10      15.634   8.396   3.482  1.00 25.88           O  
ANISOU   88  O   THR A  10     2530   3680   3622  -1339    421   -545       O  
ATOM     89  CB  THR A  10      16.107   5.535   4.428  1.00 25.15           C  
ANISOU   89  CB  THR A  10     2094   3467   3997  -1139    434   -469       C  
ATOM     90  CG2 THR A  10      16.802   4.512   5.326  1.00 23.61           C  
ANISOU   90  CG2 THR A  10     1737   3252   3984  -1058    419   -370       C  
ATOM     91  OG1 THR A  10      14.940   4.949   3.827  1.00 23.24           O  
ANISOU   91  OG1 THR A  10     1885   3119   3826  -1096    458   -536       O  
ATOM     92  N   LEU A  11      13.704   7.914   4.515  1.00 24.38           N  
ANISOU   92  N   LEU A  11     2395   3343   3525  -1227    375   -428       N  
ATOM     93  CA  LEU A  11      12.928   8.889   3.773  1.00 23.93           C  
ANISOU   93  CA  LEU A  11     2484   3286   3321  -1269    375   -477       C  
ATOM     94  C   LEU A  11      12.005   9.586   4.758  1.00 21.23           C  
ANISOU   94  C   LEU A  11     2255   2901   2910  -1252    355   -364       C  
ATOM     95  O   LEU A  11      11.163   8.947   5.388  1.00 19.42           O  
ANISOU   95  O   LEU A  11     1988   2589   2802  -1180    351   -304       O  
ATOM     96  CB  LEU A  11      12.093   8.192   2.703  1.00 24.67           C  
ANISOU   96  CB  LEU A  11     2549   3318   3507  -1233    380   -574       C  
ATOM     97  CG  LEU A  11      11.048   9.072   2.025  1.00 26.74           C  
ANISOU   97  CG  LEU A  11     2946   3568   3645  -1254    352   -596       C  
ATOM     98  CD1 LEU A  11      11.740  10.190   1.250  1.00 26.98           C  
ANISOU   98  CD1 LEU A  11     3094   3681   3475  -1347    366   -653       C  
ATOM     99  CD2 LEU A  11      10.188   8.219   1.113  1.00 31.22           C  
ANISOU   99  CD2 LEU A  11     3464   4077   4321  -1225    335   -680       C  
ATOM    100  N   ARG A  12      12.160  10.893   4.894  1.00 19.40           N  
ANISOU  100  N   ARG A  12     2168   2715   2488  -1322    359   -339       N  
ATOM    101  CA  ARG A  12      11.424  11.611   5.914  1.00 20.56           C  
ANISOU  101  CA  ARG A  12     2436   2813   2563  -1313    366   -233       C  
ATOM    102  C   ARG A  12      10.212  12.317   5.315  1.00 21.58           C  
ANISOU  102  C   ARG A  12     2674   2887   2639  -1286    375   -246       C  
ATOM    103  O   ARG A  12      10.173  12.599   4.105  1.00 18.44           O  
ANISOU  103  O   ARG A  12     2302   2517   2189  -1308    363   -331       O  
ATOM    104  CB  ARG A  12      12.351  12.585   6.662  1.00 28.23           C  
ANISOU  104  CB  ARG A  12     3509   3854   3362  -1411    373   -182       C  
ATOM    105  CG  ARG A  12      13.699  11.973   7.068  1.00 32.64           C  
ANISOU  105  CG  ARG A  12     3938   4495   3969  -1449    342   -172       C  
ATOM    106  CD  ARG A  12      14.537  12.884   7.984  1.00 34.31           C  
ANISOU  106  CD  ARG A  12     4245   4779   4014  -1560    329   -107       C  
ATOM    107  NE  ARG A  12      13.898  13.073   9.281  1.00 36.57           N  
ANISOU  107  NE  ARG A  12     4633   5000   4262  -1549    331      7       N  
ATOM    108  CZ  ARG A  12      14.184  12.378  10.384  1.00 34.00           C  
ANISOU  108  CZ  ARG A  12     4244   4674   4002  -1533    289    101       C  
ATOM    109  NH1 ARG A  12      15.135  11.453  10.378  1.00 30.63           N1+
ANISOU  109  NH1 ARG A  12     3634   4310   3694  -1517    233    106       N1+
ATOM    110  NH2 ARG A  12      13.525  12.632  11.506  1.00 31.19           N  
ANISOU  110  NH2 ARG A  12     4015   4249   3588  -1535    308    196       N  
ATOM    111  N   MET A  13       9.215  12.565   6.167  1.00 20.95           N  
ANISOU  111  N   MET A  13     2654   2727   2580  -1236    398   -156       N  
ATOM    112  CA  MET A  13       7.986  13.240   5.775  1.00 20.99           C  
ANISOU  112  CA  MET A  13     2742   2670   2564  -1191    410   -141       C  
ATOM    113  C   MET A  13       8.293  14.647   5.299  1.00 22.67           C  
ANISOU  113  C   MET A  13     3125   2919   2570  -1257    428   -155       C  
ATOM    114  O   MET A  13       9.292  15.241   5.708  1.00 25.07           O  
ANISOU  114  O   MET A  13     3511   3277   2739  -1344    452   -149       O  
ATOM    115  CB  MET A  13       7.008  13.312   6.947  1.00 17.62           C  
ANISOU  115  CB  MET A  13     2350   2145   2198  -1131    462    -35       C  
ATOM    116  CG  MET A  13       6.420  11.957   7.346  1.00 17.51           C  
ANISOU  116  CG  MET A  13     2182   2072   2399  -1059    456    -17       C  
ATOM    117  SD  MET A  13       5.118  12.126   8.589  1.00 23.13           S  
ANISOU  117  SD  MET A  13     2946   2659   3185   -992    541     99       S  
ATOM    118  CE  MET A  13       6.080  12.541  10.032  1.00 20.89           C  
ANISOU  118  CE  MET A  13     2795   2391   2752  -1060    587    176       C  
ATOM    119  N   ARG A  14       7.441  15.176   4.429  1.00 24.82           N  
ANISOU  119  N   ARG A  14     3284   3063   3082  -1215    -63    662       N  
ATOM    120  CA  ARG A  14       7.627  16.534   3.938  1.00 27.55           C  
ANISOU  120  CA  ARG A  14     3627   3345   3496  -1361   -137    831       C  
ATOM    121  C   ARG A  14       6.483  17.417   4.402  1.00 24.85           C  
ANISOU  121  C   ARG A  14     3446   2689   3306  -1333   -132    822       C  
ATOM    122  O   ARG A  14       5.320  17.145   4.094  1.00 22.35           O  
ANISOU  122  O   ARG A  14     3141   2317   3033  -1214    -71    796       O  
ATOM    123  CB  ARG A  14       7.725  16.546   2.413  1.00 27.32           C  
ANISOU  123  CB  ARG A  14     3420   3555   3405  -1406   -137    982       C  
ATOM    124  N   SER A  15       6.811  18.460   5.162  1.00 22.82           N  
ANISOU  124  N   SER A  15     3312   2224   3134  -1445   -191    836       N  
ATOM    125  CA  SER A  15       5.812  19.438   5.570  1.00 21.83           C  
ANISOU  125  CA  SER A  15     3335   1780   3181  -1427   -180    828       C  
ATOM    126  C   SER A  15       5.248  20.030   4.301  1.00 24.06           C  
ANISOU  126  C   SER A  15     3516   2084   3541  -1435   -203   1018       C  
ATOM    127  O   SER A  15       5.974  20.214   3.335  1.00 25.51           O  
ANISOU  127  O   SER A  15     3561   2473   3657  -1545   -266   1180       O  
ATOM    128  CB  SER A  15       6.432  20.538   6.430  1.00 22.89           C  
ANISOU  128  CB  SER A  15     3606   1705   3384  -1581   -245    826       C  
ATOM    129  OG  SER A  15       6.906  20.019   7.660  1.00 24.44           O  
ANISOU  129  OG  SER A  15     3903   1883   3500  -1596   -231    659       O  
ATOM    130  N   HIS A  16       3.953  20.315   4.283  1.00 26.51           N  
ANISOU  130  N   HIS A  16     3884   2198   3992  -1326   -153   1011       N  
ATOM    131  CA  HIS A  16       3.339  20.826   3.065  1.00 28.82           C  
ANISOU  131  CA  HIS A  16     4066   2519   4365  -1335   -185   1215       C  
ATOM    132  C   HIS A  16       1.992  21.497   3.296  1.00 32.22           C  
ANISOU  132  C   HIS A  16     4581   2646   5014  -1233   -147   1222       C  
ATOM    133  O   HIS A  16       1.412  21.408   4.378  1.00 29.86           O  
ANISOU  133  O   HIS A  16     4423   2136   4788  -1133    -70   1039       O  
ATOM    134  CB  HIS A  16       3.212  19.716   2.010  1.00 25.53           C  
ANISOU  134  CB  HIS A  16     3483   2431   3787  -1283   -153   1253       C  
ATOM    135  CG  HIS A  16       2.309  18.583   2.407  1.00 24.31           C  
ANISOU  135  CG  HIS A  16     3363   2286   3590  -1104    -48   1078       C  
ATOM    136  CD2 HIS A  16       0.989  18.367   2.166  1.00 21.19           C  
ANISOU  136  CD2 HIS A  16     2964   1823   3263   -982      6   1081       C  
ATOM    137  ND1 HIS A  16       2.756  17.481   3.101  1.00 21.27           N  
ANISOU  137  ND1 HIS A  16     3008   2002   3074  -1043      4    890       N  
ATOM    138  CE1 HIS A  16       1.754  16.637   3.281  1.00 21.30           C  
ANISOU  138  CE1 HIS A  16     3036   1992   3063   -896     85    777       C  
ATOM    139  NE2 HIS A  16       0.671  17.152   2.722  1.00 21.55           N  
ANISOU  139  NE2 HIS A  16     3048   1930   3210   -857     91    888       N  
ATOM    140  N   ARG A  17       1.512  22.181   2.265  1.00 34.85           N  
ANISOU  140  N   ARG A  17     4818   2967   5456  -1266   -202   1444       N  
ATOM    141  CA  ARG A  17       0.214  22.832   2.309  1.00 37.83           C  
ANISOU  141  CA  ARG A  17     5234   3072   6067  -1162   -173   1495       C  
ATOM    142  C   ARG A  17      -0.825  21.948   1.634  1.00 34.89           C  
ANISOU  142  C   ARG A  17     4752   2860   5643  -1036   -118   1522       C  
ATOM    143  O   ARG A  17      -0.499  21.159   0.742  1.00 32.02           O  
ANISOU  143  O   ARG A  17     4258   2820   5088  -1078   -135   1585       O  
ATOM    144  CB  ARG A  17       0.274  24.189   1.601  1.00 42.13           C  
ANISOU  144  CB  ARG A  17     5734   3480   6794  -1282   -283   1754       C  
ATOM    145  CG  ARG A  17       1.082  25.246   2.338  1.00 49.47           C  
ANISOU  145  CG  ARG A  17     6799   4172   7825  -1405   -335   1729       C  
ATOM    146  CD  ARG A  17       1.241  26.523   1.506  1.00 56.93           C  
ANISOU  146  CD  ARG A  17     7684   5012   8935  -1544   -463   2013       C  
ATOM    147  NE  ARG A  17       2.175  26.343   0.396  1.00 62.91           N  
ANISOU  147  NE  ARG A  17     8282   6120   9501  -1711   -566   2205       N  
ATOM    148  CZ  ARG A  17       1.825  25.943  -0.824  1.00 68.24           C  
ANISOU  148  CZ  ARG A  17     8779   7053  10094  -1723   -598   2385       C  
ATOM    149  NH1 ARG A  17       0.555  25.678  -1.102  1.00 69.04           N1+
ANISOU  149  NH1 ARG A  17     8836   7103  10294  -1577   -546   2414       N1+
ATOM    150  NH2 ARG A  17       2.745  25.807  -1.772  1.00 70.78           N  
ANISOU  150  NH2 ARG A  17     8963   7700  10229  -1892   -678   2536       N  
ATOM    151  N   VAL A  18      -2.071  22.066   2.082  1.00 31.82           N  
ANISOU  151  N   VAL A  18     4418   2249   5422   -887    -46   1464       N  
ATOM    152  CA  VAL A  18      -3.197  21.432   1.403  1.00 30.78           C  
ANISOU  152  CA  VAL A  18     4179   2236   5280   -780     -8   1531       C  
ATOM    153  C   VAL A  18      -4.405  22.363   1.485  1.00 30.99           C  
ANISOU  153  C   VAL A  18     4213   1959   5602   -685      5   1632       C  
ATOM    154  O   VAL A  18      -4.658  22.969   2.530  1.00 31.57           O  
ANISOU  154  O   VAL A  18     4424   1720   5851   -618     63   1497       O  
ATOM    155  CB  VAL A  18      -3.540  20.044   1.999  1.00 28.55           C  
ANISOU  155  CB  VAL A  18     3940   2076   4830   -655    100   1294       C  
ATOM    156  CG1 VAL A  18      -3.972  20.168   3.451  1.00 27.98           C  
ANISOU  156  CG1 VAL A  18     4040   1722   4871   -545    193   1065       C  
ATOM    157  CG2 VAL A  18      -4.632  19.360   1.174  1.00 28.55           C  
ANISOU  157  CG2 VAL A  18     3821   2235   4792   -575    125   1382       C  
ATOM    158  N   PRO A  19      -5.136  22.508   0.369  1.00 26.64           N  
ANISOU  158  N   PRO A  19     3509   1500   5113   -688    -48   1874       N  
ATOM    159  CA  PRO A  19      -6.327  23.358   0.386  1.00 30.85           C  
ANISOU  159  CA  PRO A  19     4019   1751   5950   -585    -39   1996       C  
ATOM    160  C   PRO A  19      -7.397  22.719   1.252  1.00 30.48           C  
ANISOU  160  C   PRO A  19     4036   1599   5945   -390    100   1786       C  
ATOM    161  O   PRO A  19      -7.562  21.504   1.228  1.00 26.16           O  
ANISOU  161  O   PRO A  19     3471   1288   5179   -348    153   1671       O  
ATOM    162  CB  PRO A  19      -6.778  23.364  -1.082  1.00 32.80           C  
ANISOU  162  CB  PRO A  19     4066   2216   6180   -657   -138   2310       C  
ATOM    163  CG  PRO A  19      -5.571  22.939  -1.867  1.00 32.70           C  
ANISOU  163  CG  PRO A  19     3992   2543   5892   -842   -216   2371       C  
ATOM    164  CD  PRO A  19      -4.878  21.951  -0.969  1.00 26.99           C  
ANISOU  164  CD  PRO A  19     3388   1910   4956   -801   -121   2056       C  
ATOM    165  N   CYS A  20      -8.102  23.532   2.023  1.00 33.77           N  
ANISOU  165  N   CYS A  20     4529   1661   6642   -277    165   1729       N  
ATOM    166  CA  CYS A  20      -9.172  23.036   2.867  1.00 33.31           C  
ANISOU  166  CA  CYS A  20     4523   1492   6642    -97    305   1535       C  
ATOM    167  C   CYS A  20     -10.128  22.161   2.061  1.00 29.57           C  
ANISOU  167  C   CYS A  20     3895   1261   6077    -34    305   1655       C  
ATOM    168  O   CYS A  20     -10.582  22.549   0.987  1.00 31.07           O  
ANISOU  168  O   CYS A  20     3929   1511   6365    -66    217   1940       O  
ATOM    169  CB  CYS A  20      -9.929  24.211   3.491  1.00 35.52           C  
ANISOU  169  CB  CYS A  20     4853   1358   7286     12    368   1527       C  
ATOM    170  SG  CYS A  20     -11.400  23.704   4.398  1.00 50.21           S  
ANISOU  170  SG  CYS A  20     6737   3093   9248    237    547   1325       S  
ATOM    171  N   GLY A  21     -10.429  20.977   2.574  1.00 27.51           N  
ANISOU  171  N   GLY A  21     3682   1147   5626     41    396   1448       N  
ATOM    172  CA  GLY A  21     -11.358  20.092   1.900  1.00 26.62           C  
ANISOU  172  CA  GLY A  21     3443   1258   5414     93    404   1537       C  
ATOM    173  C   GLY A  21     -10.679  18.963   1.149  1.00 27.37           C  
ANISOU  173  C   GLY A  21     3491   1730   5178    -19    353   1542       C  
ATOM    174  O   GLY A  21     -11.272  17.898   0.955  1.00 27.90           O  
ANISOU  174  O   GLY A  21     3520   1991   5090     24    392   1496       O  
ATOM    175  N   GLN A  22      -9.436  19.166   0.726  1.00 24.77           N  
ANISOU  175  N   GLN A  22     3164   1508   4738   -165    272   1591       N  
ATOM    176  CA  GLN A  22      -8.753  18.087   0.019  1.00 24.97           C  
ANISOU  176  CA  GLN A  22     3139   1888   4460   -265    244   1575       C  
ATOM    177  C   GLN A  22      -8.257  17.019   0.992  1.00 24.26           C  
ANISOU  177  C   GLN A  22     3179   1853   4187   -213    329   1273       C  
ATOM    178  O   GLN A  22      -8.142  17.259   2.194  1.00 22.86           O  
ANISOU  178  O   GLN A  22     3137   1456   4094   -146    387   1091       O  
ATOM    179  CB  GLN A  22      -7.585  18.616  -0.810  1.00 25.16           C  
ANISOU  179  CB  GLN A  22     3101   2040   4418   -443    136   1733       C  
ATOM    180  CG  GLN A  22      -8.004  19.617  -1.878  1.00 28.85           C  
ANISOU  180  CG  GLN A  22     3428   2489   5043   -526     29   2064       C  
ATOM    181  CD  GLN A  22      -8.965  19.025  -2.887  1.00 31.05           C  
ANISOU  181  CD  GLN A  22     3565   2994   5240   -537     12   2223       C  
ATOM    182  NE2 GLN A  22     -10.102  19.674  -3.069  1.00 32.96           N  
ANISOU  182  NE2 GLN A  22     3731   3076   5715   -469    -12   2407       N  
ATOM    183  OE1 GLN A  22      -8.689  17.992  -3.493  1.00 31.50           O  
ANISOU  183  OE1 GLN A  22     3577   3362   5031   -608     22   2181       O  
ATOM    184  N   ASN A  23      -7.972  15.839   0.456  1.00 24.67           N  
ANISOU  184  N   ASN A  23     3185   2198   3990   -252    335   1225       N  
ATOM    185  CA  ASN A  23      -7.272  14.806   1.201  1.00 22.53           C  
ANISOU  185  CA  ASN A  23     3012   2006   3541   -227    390    977       C  
ATOM    186  C   ASN A  23      -5.786  14.999   0.976  1.00 18.84           C  
ANISOU  186  C   ASN A  23     2536   1640   2981   -353    333    986       C  
ATOM    187  O   ASN A  23      -5.376  15.561  -0.037  1.00 19.39           O  
ANISOU  187  O   ASN A  23     2500   1820   3045   -472    257   1182       O  
ATOM    188  CB  ASN A  23      -7.701  13.420   0.730  1.00 16.72           C  
ANISOU  188  CB  ASN A  23     2233   1516   2605   -201    431    915       C  
ATOM    189  CG  ASN A  23      -9.193  13.244   0.748  1.00 19.93           C  
ANISOU  189  CG  ASN A  23     2617   1866   3087   -103    472    952       C  
ATOM    190  ND2 ASN A  23      -9.695  12.381  -0.129  1.00 22.26           N  
ANISOU  190  ND2 ASN A  23     2829   2395   3233   -131    474   1007       N  
ATOM    191  OD1 ASN A  23      -9.897  13.871   1.545  1.00 19.93           O  
ANISOU  191  OD1 ASN A  23     2673   1620   3278     -8    508    925       O  
ATOM    192  N   THR A  24      -4.974  14.553   1.925  1.00 18.63           N  
ANISOU  192  N   THR A  24     2613   1584   2881   -338    362    788       N  
ATOM    193  CA  THR A  24      -3.530  14.732   1.815  1.00 19.55           C  
ANISOU  193  CA  THR A  24     2716   1795   2917   -453    309    794       C  
ATOM    194  C   THR A  24      -2.813  13.540   2.432  1.00 17.57           C  
ANISOU  194  C   THR A  24     2513   1660   2502   -421    351    590       C  
ATOM    195  O   THR A  24      -3.408  12.770   3.191  1.00 17.33           O  
ANISOU  195  O   THR A  24     2563   1574   2450   -315    413    433       O  
ATOM    196  CB  THR A  24      -3.072  16.035   2.512  1.00 21.30           C  
ANISOU  196  CB  THR A  24     3023   1763   3307   -505    266    821       C  
ATOM    197  CG2 THR A  24      -3.017  15.841   4.026  1.00 20.53           C  
ANISOU  197  CG2 THR A  24     3088   1478   3233   -437    322    594       C  
ATOM    198  OG1 THR A  24      -1.784  16.431   2.016  1.00 19.37           O  
ANISOU  198  OG1 THR A  24     2720   1643   2998   -649    189    916       O  
ATOM    199  N   ARG A  25      -1.538  13.376   2.099  1.00 17.29           N  
ANISOU  199  N   ARG A  25     2419   1790   2360   -515    313    602       N  
ATOM    200  CA  ARG A  25      -0.774  12.224   2.581  1.00 20.93           C  
ANISOU  200  CA  ARG A  25     2897   2372   2685   -482    346    434       C  
ATOM    201  C   ARG A  25       0.612  12.617   3.061  1.00 20.30           C  
ANISOU  201  C   ARG A  25     2828   2290   2597   -572    293    423       C  
ATOM    202  O   ARG A  25       1.222  13.539   2.519  1.00 18.77           O  
ANISOU  202  O   ARG A  25     2574   2124   2434   -688    231    568       O  
ATOM    203  CB  ARG A  25      -0.633  11.168   1.479  1.00 23.55           C  
ANISOU  203  CB  ARG A  25     3104   2989   2856   -487    380    438       C  
ATOM    204  CG  ARG A  25      -1.857  10.282   1.307  1.00 26.20           C  
ANISOU  204  CG  ARG A  25     3455   3350   3150   -387    443    375       C  
ATOM    205  CD  ARG A  25      -2.040   9.860  -0.145  1.00 30.58           C  
ANISOU  205  CD  ARG A  25     3878   4159   3583   -449    458    469       C  
ATOM    206  NE  ARG A  25      -3.401   9.384  -0.395  1.00 33.29           N  
ANISOU  206  NE  ARG A  25     4235   4500   3913   -385    497    470       N  
ATOM    207  CZ  ARG A  25      -4.381  10.143  -0.877  1.00 35.45           C  
ANISOU  207  CZ  ARG A  25     4476   4722   4272   -409    467    634       C  
ATOM    208  NH1 ARG A  25      -4.155  11.410  -1.180  1.00 40.65           N1+
ANISOU  208  NH1 ARG A  25     5091   5312   5041   -491    398    811       N1+
ATOM    209  NH2 ARG A  25      -5.586   9.632  -1.069  1.00 36.17           N  
ANISOU  209  NH2 ARG A  25     4571   4829   4343   -354    501    636       N  
ATOM    210  N   PHE A  26       1.091  11.907   4.081  1.00 12.66           N  
ANISOU  210  N   PHE A  26     1932   1294   1585   -527    310    265       N  
ATOM    211  CA  PHE A  26       2.488  11.950   4.482  1.00 16.33           C  
ANISOU  211  CA  PHE A  26     2377   1819   2009   -608    261    251       C  
ATOM    212  C   PHE A  26       3.093  10.582   4.208  1.00 16.58           C  
ANISOU  212  C   PHE A  26     2315   2069   1914   -556    297    169       C  
ATOM    213  O   PHE A  26       2.422   9.564   4.365  1.00 12.52           O  
ANISOU  213  O   PHE A  26     1830   1566   1363   -446    354     59       O  
ATOM    214  CB  PHE A  26       2.623  12.271   5.971  1.00 17.96           C  
ANISOU  214  CB  PHE A  26     2739   1811   2274   -618    241    148       C  
ATOM    215  CG  PHE A  26       2.327  13.697   6.316  1.00 17.97           C  
ANISOU  215  CG  PHE A  26     2835   1585   2408   -690    209    211       C  
ATOM    216  CD1 PHE A  26       3.278  14.683   6.106  1.00 18.43           C  
ANISOU  216  CD1 PHE A  26     2866   1643   2495   -832    133    329       C  
ATOM    217  CD2 PHE A  26       1.110  14.054   6.866  1.00 22.11           C  
ANISOU  217  CD2 PHE A  26     3475   1890   3036   -617    258    150       C  
ATOM    218  CE1 PHE A  26       3.018  16.005   6.425  1.00 22.02           C  
ANISOU  218  CE1 PHE A  26     3416   1863   3087   -901    104    382       C  
ATOM    219  CE2 PHE A  26       0.841  15.385   7.192  1.00 20.65           C  
ANISOU  219  CE2 PHE A  26     3377   1469   2998   -674    242    195       C  
ATOM    220  CZ  PHE A  26       1.798  16.357   6.967  1.00 24.24           C  
ANISOU  220  CZ  PHE A  26     3814   1908   3487   -817    163    310       C  
ATOM    221  N   ILE A  27       4.356  10.558   3.795  1.00 14.43           N  
ANISOU  221  N   ILE A  27     1929   1967   1586   -634    266    222       N  
ATOM    222  CA  ILE A  27       5.039   9.301   3.501  1.00 13.27           C  
ANISOU  222  CA  ILE A  27     1676   2021   1347   -579    309    142       C  
ATOM    223  C   ILE A  27       6.404   9.311   4.160  1.00 14.94           C  
ANISOU  223  C   ILE A  27     1851   2267   1559   -635    254    142       C  
ATOM    224  O   ILE A  27       7.111  10.318   4.129  1.00 15.34           O  
ANISOU  224  O   ILE A  27     1878   2319   1633   -761    188    253       O  
ATOM    225  CB  ILE A  27       5.258   9.110   1.975  1.00 18.69           C  
ANISOU  225  CB  ILE A  27     2198   2959   1946   -620    352    216       C  
ATOM    226  CG1 ILE A  27       3.954   9.280   1.193  1.00 21.41           C  
ANISOU  226  CG1 ILE A  27     2560   3293   2282   -607    385    265       C  
ATOM    227  CG2 ILE A  27       5.952   7.776   1.670  1.00 17.75           C  
ANISOU  227  CG2 ILE A  27     1969   3030   1747   -550    420    107       C  
ATOM    228  CD1 ILE A  27       4.164   9.912  -0.206  1.00 22.38           C  
ANISOU  228  CD1 ILE A  27     2548   3609   2346   -736    373    427       C  
ATOM    229  N   LEU A  28       6.775   8.189   4.758  1.00 15.98           N  
ANISOU  229  N   LEU A  28     1972   2427   1671   -549    274     29       N  
ATOM    230  CA  LEU A  28       8.148   7.990   5.181  1.00 15.41           C  
ANISOU  230  CA  LEU A  28     1815   2443   1597   -592    227     47       C  
ATOM    231  C   LEU A  28       8.525   6.524   5.051  1.00 17.56           C  
ANISOU  231  C   LEU A  28     1987   2840   1845   -470    286    -52       C  
ATOM    232  O   LEU A  28       7.665   5.667   4.823  1.00 16.81           O  
ANISOU  232  O   LEU A  28     1926   2730   1732   -359    356   -150       O  
ATOM    233  CB  LEU A  28       8.379   8.488   6.607  1.00 17.34           C  
ANISOU  233  CB  LEU A  28     2193   2507   1890   -654    141     41       C  
ATOM    234  CG  LEU A  28       7.859   7.665   7.785  1.00 17.40           C  
ANISOU  234  CG  LEU A  28     2322   2378   1911   -568    141    -84       C  
ATOM    235  CD1 LEU A  28       8.731   7.940   8.982  1.00 18.81           C  
ANISOU  235  CD1 LEU A  28     2547   2498   2103   -668     46    -61       C  
ATOM    236  CD2 LEU A  28       6.409   7.995   8.099  1.00 14.95           C  
ANISOU  236  CD2 LEU A  28     2178   1881   1624   -530    176   -146       C  
ATOM    237  N   ASN A  29       9.815   6.242   5.178  1.00 15.71           N  
ANISOU  237  N   ASN A  29     1624   2725   1619   -491    258    -22       N  
ATOM    238  CA  ASN A  29      10.310   4.879   5.082  1.00 17.16           C  
ANISOU  238  CA  ASN A  29     1695   3012   1814   -369    314   -109       C  
ATOM    239  C   ASN A  29      11.235   4.620   6.236  1.00 17.66           C  
ANISOU  239  C   ASN A  29     1741   3032   1937   -379    227    -86       C  
ATOM    240  O   ASN A  29      12.133   5.417   6.500  1.00 17.97           O  
ANISOU  240  O   ASN A  29     1733   3114   1982   -501    150     24       O  
ATOM    241  CB  ASN A  29      11.061   4.647   3.760  1.00 18.58           C  
ANISOU  241  CB  ASN A  29     1668   3441   1952   -372    395    -89       C  
ATOM    242  CG  ASN A  29      11.554   3.209   3.613  1.00 22.89           C  
ANISOU  242  CG  ASN A  29     2091   4074   2532   -229    475   -199       C  
ATOM    243  ND2 ASN A  29      12.876   3.017   3.661  1.00 22.14           N  
ANISOU  243  ND2 ASN A  29     1826   4105   2482   -235    462   -153       N  
ATOM    244  OD1 ASN A  29      10.753   2.285   3.452  1.00 22.86           O  
ANISOU  244  OD1 ASN A  29     2142   4020   2523   -116    547   -320       O  
ATOM    245  N   VAL A  30      11.012   3.508   6.927  1.00 16.59           N  
ANISOU  245  N   VAL A  30     1709   2145   2451   -124    530   -234       N  
ATOM    246  CA  VAL A  30      11.873   3.116   8.027  1.00 17.07           C  
ANISOU  246  CA  VAL A  30     1734   2080   2670   -172    500   -208       C  
ATOM    247  C   VAL A  30      12.485   1.743   7.765  1.00 21.93           C  
ANISOU  247  C   VAL A  30     2261   2720   3352   -144    565   -305       C  
ATOM    248  O   VAL A  30      11.819   0.840   7.243  1.00 21.47           O  
ANISOU  248  O   VAL A  30     2190   2721   3249    -92    594   -443       O  
ATOM    249  CB  VAL A  30      11.123   3.108   9.386  1.00 17.59           C  
ANISOU  249  CB  VAL A  30     1882   2018   2782   -195    404   -235       C  
ATOM    250  CG1 VAL A  30       9.946   2.119   9.361  1.00 16.18           C  
ANISOU  250  CG1 VAL A  30     1722   1849   2577   -156    422   -378       C  
ATOM    251  CG2 VAL A  30      12.083   2.762  10.517  1.00 15.88           C  
ANISOU  251  CG2 VAL A  30     1649   1682   2701   -224    355   -198       C  
ATOM    252  N   GLN A  31      13.758   1.610   8.122  1.00 20.46           N  
ANISOU  252  N   GLN A  31     2002   2475   3296   -175    575   -242       N  
ATOM    253  CA  GLN A  31      14.454   0.334   8.107  1.00 22.91           C  
ANISOU  253  CA  GLN A  31     2221   2771   3712   -155    615   -327       C  
ATOM    254  C   GLN A  31      14.799  -0.034   9.551  1.00 21.49           C  
ANISOU  254  C   GLN A  31     2061   2427   3678   -189    517   -308       C  
ATOM    255  O   GLN A  31      15.476   0.727  10.247  1.00 21.67           O  
ANISOU  255  O   GLN A  31     2094   2366   3775   -228    445   -205       O  
ATOM    256  CB  GLN A  31      15.711   0.432   7.238  1.00 25.56           C  
ANISOU  256  CB  GLN A  31     2443   3180   4088   -148    718   -274       C  
ATOM    257  CG  GLN A  31      15.403   0.564   5.747  1.00 27.22           C  
ANISOU  257  CG  GLN A  31     2646   3579   4118    -82    835   -304       C  
ATOM    258  CD  GLN A  31      16.623   0.928   4.916  1.00 31.26           C  
ANISOU  258  CD  GLN A  31     3059   4169   4651    -73    967   -203       C  
ATOM    259  NE2 GLN A  31      16.424   1.068   3.604  1.00 31.28           N  
ANISOU  259  NE2 GLN A  31     3069   4353   4462      4   1084   -210       N  
ATOM    260  OE1 GLN A  31      17.733   1.086   5.445  1.00 30.01           O  
ANISOU  260  OE1 GLN A  31     2814   3907   4680   -127    967   -118       O  
ATOM    261  N  ASER A  32      14.345  -1.203   9.998  0.53 20.71           N  
ANISOU  261  N  ASER A  32     1966   2276   3627   -166    506   -405       N  
ATOM    262  N  BSER A  32      14.323  -1.195   9.990  0.47 20.73           N  
ANISOU  262  N  BSER A  32     1970   2280   3627   -166    506   -405       N  
ATOM    263  CA ASER A  32      14.479  -1.580  11.404  0.53 20.57           C  
ANISOU  263  CA ASER A  32     1998   2111   3705   -179    417   -371       C  
ATOM    264  CA BSER A  32      14.486  -1.615  11.375  0.47 20.86           C  
ANISOU  264  CA BSER A  32     2031   2150   3744   -178    420   -375       C  
ATOM    265  C  ASER A  32      14.602  -3.088  11.600  0.53 22.48           C  
ANISOU  265  C  ASER A  32     2177   2294   4068   -152    438   -455       C  
ATOM    266  C  BSER A  32      14.697  -3.113  11.480  0.47 22.83           C  
ANISOU  266  C  BSER A  32     2208   2348   4118   -151    445   -460       C  
ATOM    267  O  ASER A  32      13.779  -3.851  11.095  0.53 24.64           O  
ANISOU  267  O  ASER A  32     2425   2602   4336   -123    493   -561       O  
ATOM    268  O  BSER A  32      14.031  -3.889  10.798  0.47 24.93           O  
ANISOU  268  O  BSER A  32     2430   2664   4379   -120    508   -574       O  
ATOM    269  CB ASER A  32      13.277  -1.047  12.195  0.53 19.75           C  
ANISOU  269  CB ASER A  32     2031   1968   3506   -181    368   -346       C  
ATOM    270  CB BSER A  32      13.251  -1.229  12.190  0.47 19.93           C  
ANISOU  270  CB BSER A  32     2046   1987   3538   -177    374   -358       C  
ATOM    271  OG ASER A  32      13.390  -1.333  13.578  0.53 20.33           O  
ANISOU  271  OG ASER A  32     2177   1917   3630   -173    292   -299       O  
ATOM    272  OG BSER A  32      12.953   0.143  12.039  0.47 18.82           O  
ANISOU  272  OG BSER A  32     1967   1890   3296   -198    344   -295       O  
ATOM    273  N   LYS A  33      15.624  -3.517  12.342  1.00 21.03           N  
ANISOU  273  N   LYS A  33     1962   2010   4018   -155    379   -414       N  
ATOM    274  CA  LYS A  33      15.785  -4.933  12.672  1.00 25.93           C  
ANISOU  274  CA  LYS A  33     2527   2549   4778   -129    383   -471       C  
ATOM    275  C   LYS A  33      15.977  -5.126  14.180  1.00 23.26           C  
ANISOU  275  C   LYS A  33     2283   2065   4488   -118    279   -378       C  
ATOM    276  O   LYS A  33      16.974  -4.688  14.738  1.00 23.45           O  
ANISOU  276  O   LYS A  33     2313   2035   4560   -123    184   -313       O  
ATOM    277  CB  LYS A  33      16.939  -5.561  11.889  1.00 31.20           C  
ANISOU  277  CB  LYS A  33     3035   3241   5577   -120    424   -536       C  
ATOM    278  CG  LYS A  33      17.103  -7.049  12.155  1.00 37.07           C  
ANISOU  278  CG  LYS A  33     3703   3889   6491    -91    420   -607       C  
ATOM    279  CD  LYS A  33      17.855  -7.749  11.031  1.00 42.44           C  
ANISOU  279  CD  LYS A  33     4215   4635   7275    -67    494   -731       C  
ATOM    280  CE  LYS A  33      17.926  -9.250  11.274  1.00 46.21           C  
ANISOU  280  CE  LYS A  33     4608   5002   7949    -36    481   -815       C  
ATOM    281  NZ  LYS A  33      18.359  -9.993  10.059  1.00 51.15           N1+
ANISOU  281  NZ  LYS A  33     5071   5709   8655      4    560   -982       N1+
ATOM    282  N   PRO A  34      15.007  -5.771  14.845  1.00 23.02           N  
ANISOU  282  N   PRO A  34     2327   1972   4449    -95    297   -370       N  
ATOM    283  CA  PRO A  34      13.791  -6.297  14.219  1.00 23.98           C  
ANISOU  283  CA  PRO A  34     2419   2130   4562    -90    396   -459       C  
ATOM    284  C   PRO A  34      12.825  -5.206  13.769  1.00 22.82           C  
ANISOU  284  C   PRO A  34     2339   2082   4248   -106    423   -471       C  
ATOM    285  O   PRO A  34      13.010  -4.027  14.065  1.00 19.11           O  
ANISOU  285  O   PRO A  34     1951   1642   3668   -123    369   -396       O  
ATOM    286  CB  PRO A  34      13.153  -7.146  15.324  1.00 25.50           C  
ANISOU  286  CB  PRO A  34     2676   2192   4822    -63    405   -398       C  
ATOM    287  CG  PRO A  34      13.755  -6.694  16.587  1.00 25.11           C  
ANISOU  287  CG  PRO A  34     2752   2076   4713    -45    308   -265       C  
ATOM    288  CD  PRO A  34      15.111  -6.143  16.267  1.00 23.63           C  
ANISOU  288  CD  PRO A  34     2508   1921   4549    -61    221   -270       C  
ATOM    289  N   THR A  35      11.791  -5.617  13.047  1.00 23.17           N  
ANISOU  289  N   THR A  35     2338   2166   4299    -95    493   -575       N  
ATOM    290  CA  THR A  35      10.809  -4.681  12.526  1.00 24.16           C  
ANISOU  290  CA  THR A  35     2515   2381   4284   -101    509   -603       C  
ATOM    291  C   THR A  35      10.236  -3.852  13.657  1.00 21.08           C  
ANISOU  291  C   THR A  35     2268   1938   3803   -112    477   -493       C  
ATOM    292  O   THR A  35       9.931  -4.381  14.730  1.00 20.62           O  
ANISOU  292  O   THR A  35     2265   1774   3796    -97    487   -434       O  
ATOM    293  CB  THR A  35       9.687  -5.425  11.791  1.00 26.55           C  
ANISOU  293  CB  THR A  35     2743   2695   4649    -74    563   -747       C  
ATOM    294  CG2 THR A  35       8.618  -4.454  11.336  1.00 27.00           C  
ANISOU  294  CG2 THR A  35     2858   2829   4571    -73    560   -776       C  
ATOM    295  OG1 THR A  35      10.244  -6.086  10.649  1.00 25.50           O  
ANISOU  295  OG1 THR A  35     2484   2634   4568    -45    580   -875       O  
ATOM    296  N   ALA A  36      10.087  -2.552  13.408  1.00 18.07           N  
ANISOU  296  N   ALA A  36     1948   1633   3286   -129    442   -462       N  
ATOM    297  CA  ALA A  36       9.741  -1.596  14.457  1.00 18.92           C  
ANISOU  297  CA  ALA A  36     2187   1699   3301   -132    391   -372       C  
ATOM    298  C   ALA A  36       8.236  -1.465  14.678  1.00 18.84           C  
ANISOU  298  C   ALA A  36     2230   1676   3253   -121    441   -403       C  
ATOM    299  O   ALA A  36       7.447  -1.638  13.751  1.00 16.90           O  
ANISOU  299  O   ALA A  36     1920   1479   3023   -119    484   -500       O  
ATOM    300  CB  ALA A  36      10.332  -0.230  14.128  1.00 17.90           C  
ANISOU  300  CB  ALA A  36     2080   1632   3088   -158    321   -323       C  
ATOM    301  N   GLU A  37       7.848  -1.162  15.916  1.00 19.51           N  
ANISOU  301  N   GLU A  37     2431   1694   3289   -101    431   -329       N  
ATOM    302  CA  GLU A  37       6.487  -0.742  16.208  1.00 20.55           C  
ANISOU  302  CA  GLU A  37     2618   1815   3375    -90    479   -347       C  
ATOM    303  C   GLU A  37       6.346   0.685  15.712  1.00 19.65           C  
ANISOU  303  C   GLU A  37     2536   1777   3154   -110    407   -360       C  
ATOM    304  O   GLU A  37       7.266   1.493  15.872  1.00 22.98           O  
ANISOU  304  O   GLU A  37     2994   2214   3522   -120    315   -305       O  
ATOM    305  CB  GLU A  37       6.217  -0.780  17.715  1.00 25.14           C  
ANISOU  305  CB  GLU A  37     3326   2318   3907    -46    502   -256       C  
ATOM    306  CG  GLU A  37       6.430  -2.141  18.355  1.00 33.02           C  
ANISOU  306  CG  GLU A  37     4313   3229   5005    -18    573   -200       C  
ATOM    307  CD  GLU A  37       6.376  -2.083  19.868  1.00 38.51           C  
ANISOU  307  CD  GLU A  37     5163   3868   5599     47    585    -85       C  
ATOM    308  OE1 GLU A  37       6.629  -1.001  20.433  1.00 41.42           O  
ANISOU  308  OE1 GLU A  37     5646   4272   5819     74    490    -63       O  
ATOM    309  OE2 GLU A  37       6.085  -3.121  20.492  1.00 39.94           O1-
ANISOU  309  OE2 GLU A  37     5353   3970   5852     81    687    -15       O1-
ATOM    310  N   VAL A  38       5.193   1.006  15.132  1.00 15.61           N  
ANISOU  310  N   VAL A  38     2002   1294   2635   -112    440   -430       N  
ATOM    311  CA  VAL A  38       4.943   2.351  14.609  1.00 13.25           C  
ANISOU  311  CA  VAL A  38     1730   1057   2247   -126    370   -436       C  
ATOM    312  C   VAL A  38       3.726   2.986  15.273  1.00 14.67           C  
ANISOU  312  C   VAL A  38     1979   1198   2395   -108    383   -450       C  
ATOM    313  O   VAL A  38       2.652   2.381  15.318  1.00 15.93           O  
ANISOU  313  O   VAL A  38     2106   1320   2628    -94    467   -510       O  
ATOM    314  CB  VAL A  38       4.695   2.328  13.084  1.00 16.46           C  
ANISOU  314  CB  VAL A  38     2045   1554   2655   -132    371   -517       C  
ATOM    315  CG1 VAL A  38       4.275   3.702  12.592  1.00 17.24           C  
ANISOU  315  CG1 VAL A  38     2180   1703   2666   -138    304   -505       C  
ATOM    316  CG2 VAL A  38       5.937   1.809  12.326  1.00 15.61           C  
ANISOU  316  CG2 VAL A  38     1866   1506   2561   -139    373   -508       C  
ATOM    317  N   LYS A  39       3.897   4.205  15.783  1.00 15.05           N  
ANISOU  317  N   LYS A  39     2111   1245   2362   -107    300   -404       N  
ATOM    318  CA  LYS A  39       2.793   4.955  16.358  1.00 17.76           C  
ANISOU  318  CA  LYS A  39     2517   1559   2672    -84    303   -430       C  
ATOM    319  C   LYS A  39       2.716   6.331  15.703  1.00 19.05           C  
ANISOU  319  C   LYS A  39     2680   1761   2797   -105    198   -436       C  
ATOM    320  O   LYS A  39       3.739   6.974  15.484  1.00 16.12           O  
ANISOU  320  O   LYS A  39     2310   1408   2407   -126    109   -377       O  
ATOM    321  CB  LYS A  39       2.963   5.102  17.879  1.00 15.78           C  
ANISOU  321  CB  LYS A  39     2386   1255   2356    -37    300   -379       C  
ATOM    322  CG  LYS A  39       2.699   3.822  18.674  1.00 20.70           C  
ANISOU  322  CG  LYS A  39     3029   1827   3008     -1    432   -350       C  
ATOM    323  CD  LYS A  39       2.811   4.084  20.180  1.00 28.76           C  
ANISOU  323  CD  LYS A  39     4197   2817   3914     73    427   -293       C  
ATOM    324  CE  LYS A  39       2.387   2.862  21.002  1.00 35.98           C  
ANISOU  324  CE  LYS A  39     5144   3680   4849    120    588   -233       C  
ATOM    325  NZ  LYS A  39       0.952   2.499  20.774  1.00 39.28           N1+
ANISOU  325  NZ  LYS A  39     5489   4063   5371    111    746   -275       N1+
ATOM    326  N   TRP A  40       1.499   6.770  15.393  1.00 17.44           N  
ANISOU  326  N   TRP A  40     2462   1556   2607    -97    209   -501       N  
ATOM    327  CA  TRP A  40       1.269   8.057  14.735  1.00 16.50           C  
ANISOU  327  CA  TRP A  40     2341   1462   2466   -110    109   -502       C  
ATOM    328  C   TRP A  40       0.626   9.032  15.711  1.00 16.47           C  
ANISOU  328  C   TRP A  40     2411   1401   2447    -84     68   -521       C  
ATOM    329  O   TRP A  40      -0.164   8.621  16.560  1.00 17.23           O  
ANISOU  329  O   TRP A  40     2539   1456   2553    -49    154   -565       O  
ATOM    330  CB  TRP A  40       0.341   7.882  13.526  1.00 13.36           C  
ANISOU  330  CB  TRP A  40     1869   1107   2100   -106    122   -579       C  
ATOM    331  CG  TRP A  40       1.006   7.348  12.286  1.00 15.53           C  
ANISOU  331  CG  TRP A  40     2081   1468   2352   -115    122   -570       C  
ATOM    332  CD1 TRP A  40       0.974   6.054  11.822  1.00 13.26           C  
ANISOU  332  CD1 TRP A  40     1726   1204   2107   -101    194   -638       C  
ATOM    333  CD2 TRP A  40       1.774   8.092  11.331  1.00 16.56           C  
ANISOU  333  CD2 TRP A  40     2205   1671   2418   -127     58   -492       C  
ATOM    334  CE2 TRP A  40       2.185   7.188  10.324  1.00 14.23           C  
ANISOU  334  CE2 TRP A  40     1850   1460   2098   -112    103   -520       C  
ATOM    335  CE3 TRP A  40       2.156   9.437  11.230  1.00 18.74           C  
ANISOU  335  CE3 TRP A  40     2512   1941   2668   -146    -28   -395       C  
ATOM    336  NE1 TRP A  40       1.682   5.951  10.648  1.00 14.85           N  
ANISOU  336  NE1 TRP A  40     1889   1503   2249    -96    173   -623       N  
ATOM    337  CZ2 TRP A  40       2.956   7.585   9.234  1.00 16.40           C  
ANISOU  337  CZ2 TRP A  40     2108   1830   2293   -107     87   -445       C  
ATOM    338  CZ3 TRP A  40       2.924   9.829  10.154  1.00 19.06           C  
ANISOU  338  CZ3 TRP A  40     2525   2057   2660   -153    -43   -303       C  
ATOM    339  CH2 TRP A  40       3.314   8.909   9.164  1.00 19.23           C  
ANISOU  339  CH2 TRP A  40     2500   2179   2628   -130     24   -323       C  
ATOM    340  N   TYR A  41       0.939  10.317  15.568  1.00 15.18           N  
ANISOU  340  N   TYR A  41     2265   1230   2274    -95    -54   -487       N  
ATOM    341  CA  TYR A  41       0.401  11.348  16.463  1.00 16.14           C  
ANISOU  341  CA  TYR A  41     2449   1293   2390    -63   -117   -524       C  
ATOM    342  C   TYR A  41       0.000  12.599  15.692  1.00 17.26           C  
ANISOU  342  C   TYR A  41     2558   1426   2576    -81   -225   -525       C  
ATOM    343  O   TYR A  41       0.669  12.980  14.731  1.00 18.04           O  
ANISOU  343  O   TYR A  41     2612   1553   2689   -118   -283   -446       O  
ATOM    344  CB  TYR A  41       1.438  11.740  17.524  1.00 15.74           C  
ANISOU  344  CB  TYR A  41     2470   1203   2305    -40   -199   -487       C  
ATOM    345  CG  TYR A  41       1.943  10.593  18.378  1.00 17.20           C  
ANISOU  345  CG  TYR A  41     2707   1393   2435     -8   -119   -470       C  
ATOM    346  CD1 TYR A  41       1.413  10.361  19.647  1.00 18.87           C  
ANISOU  346  CD1 TYR A  41     3015   1581   2572     65    -58   -509       C  
ATOM    347  CD2 TYR A  41       2.937   9.734  17.911  1.00 14.17           C  
ANISOU  347  CD2 TYR A  41     2279   1037   2069    -43    -95   -408       C  
ATOM    348  CE1 TYR A  41       1.862   9.303  20.431  1.00 18.72           C  
ANISOU  348  CE1 TYR A  41     3055   1564   2493    105     17   -469       C  
ATOM    349  CE2 TYR A  41       3.402   8.667  18.698  1.00 14.10           C  
ANISOU  349  CE2 TYR A  41     2315   1019   2023    -10    -32   -385       C  
ATOM    350  CZ  TYR A  41       2.856   8.462  19.949  1.00 19.35           C  
ANISOU  350  CZ  TYR A  41     3085   1658   2610     64     21   -407       C  
ATOM    351  OH  TYR A  41       3.294   7.421  20.746  1.00 19.65           O  
ANISOU  351  OH  TYR A  41     3180   1685   2600    108     84   -361       O  
ATOM    352  N   HIS A  42      -1.078  13.246  16.127  1.00 17.34           N  
ANISOU  352  N   HIS A  42     2587   1391   2610    -49   -242   -603       N  
ATOM    353  CA  HIS A  42      -1.410  14.587  15.657  1.00 18.38           C  
ANISOU  353  CA  HIS A  42     2697   1487   2799    -56   -369   -602       C  
ATOM    354  C   HIS A  42      -1.411  15.522  16.860  1.00 19.32           C  
ANISOU  354  C   HIS A  42     2876   1533   2931    -16   -452   -651       C  
ATOM    355  O   HIS A  42      -2.184  15.331  17.794  1.00 17.35           O  
ANISOU  355  O   HIS A  42     2673   1267   2653     38   -383   -742       O  
ATOM    356  CB  HIS A  42      -2.773  14.626  14.974  1.00 17.73           C  
ANISOU  356  CB  HIS A  42     2566   1407   2762    -45   -347   -678       C  
ATOM    357  CG  HIS A  42      -3.208  16.009  14.590  1.00 21.52           C  
ANISOU  357  CG  HIS A  42     3029   1837   3309    -43   -484   -679       C  
ATOM    358  CD2 HIS A  42      -2.502  17.065  14.117  1.00 23.32           C  
ANISOU  358  CD2 HIS A  42     3247   2040   3573    -70   -612   -578       C  
ATOM    359  ND1 HIS A  42      -4.515  16.437  14.692  1.00 22.44           N  
ANISOU  359  ND1 HIS A  42     3125   1907   3495    -11   -498   -785       N  
ATOM    360  CE1 HIS A  42      -4.597  17.696  14.296  1.00 23.35           C  
ANISOU  360  CE1 HIS A  42     3224   1972   3674    -15   -641   -755       C  
ATOM    361  NE2 HIS A  42      -3.392  18.101  13.941  1.00 21.75           N  
ANISOU  361  NE2 HIS A  42     3027   1779   3456    -52   -708   -622       N  
ATOM    362  N   ASN A  43      -0.530  16.519  16.828  1.00 17.27           N  
ANISOU  362  N   ASN A  43     2610   1227   2725    -35   -595   -591       N  
ATOM    363  CA  ASN A  43      -0.341  17.435  17.943  1.00 22.26           C  
ANISOU  363  CA  ASN A  43     3291   1782   3386     13   -711   -655       C  
ATOM    364  C   ASN A  43      -0.257  16.736  19.298  1.00 21.68           C  
ANISOU  364  C   ASN A  43     3316   1726   3196     86   -644   -726       C  
ATOM    365  O   ASN A  43      -0.909  17.131  20.265  1.00 22.20           O  
ANISOU  365  O   ASN A  43     3444   1767   3224    161   -651   -834       O  
ATOM    366  CB  ASN A  43      -1.413  18.526  17.932  1.00 24.43           C  
ANISOU  366  CB  ASN A  43     3547   1997   3740     37   -785   -736       C  
ATOM    367  CG  ASN A  43      -1.189  19.548  16.826  1.00 29.73           C  
ANISOU  367  CG  ASN A  43     4136   2619   4539    -19   -908   -641       C  
ATOM    368  ND2 ASN A  43      -2.270  20.188  16.379  1.00 28.46           N  
ANISOU  368  ND2 ASN A  43     3943   2428   4444    -11   -943   -685       N  
ATOM    369  OD1 ASN A  43      -0.056  19.761  16.382  1.00 27.16           O  
ANISOU  369  OD1 ASN A  43     3774   2279   4267    -65   -966   -521       O  
ATOM    370  N   GLY A  44       0.564  15.695  19.360  1.00 20.07           N  
ANISOU  370  N   GLY A  44     3130   1568   2929     72   -576   -661       N  
ATOM    371  CA  GLY A  44       0.855  15.024  20.614  1.00 17.23           C  
ANISOU  371  CA  GLY A  44     2874   1223   2450    148   -530   -695       C  
ATOM    372  C   GLY A  44      -0.069  13.869  20.949  1.00 18.26           C  
ANISOU  372  C   GLY A  44     3042   1403   2492    180   -322   -714       C  
ATOM    373  O   GLY A  44       0.271  13.044  21.795  1.00 20.43           O  
ANISOU  373  O   GLY A  44     3398   1700   2665    233   -251   -695       O  
ATOM    374  N   VAL A  45      -1.231  13.806  20.297  1.00 18.05           N  
ANISOU  374  N   VAL A  45     2951   1383   2523    152   -230   -746       N  
ATOM    375  CA  VAL A  45      -2.222  12.765  20.604  1.00 18.11           C  
ANISOU  375  CA  VAL A  45     2964   1410   2506    180    -27   -769       C  
ATOM    376  C   VAL A  45      -2.176  11.601  19.600  1.00 18.26           C  
ANISOU  376  C   VAL A  45     2895   1459   2584    113     70   -715       C  
ATOM    377  O   VAL A  45      -2.249  11.805  18.388  1.00 17.31           O  
ANISOU  377  O   VAL A  45     2687   1351   2538     55     14   -712       O  
ATOM    378  CB  VAL A  45      -3.659  13.357  20.705  1.00 16.83           C  
ANISOU  378  CB  VAL A  45     2775   1216   2403    210     22   -869       C  
ATOM    379  CG1 VAL A  45      -4.693  12.251  20.854  1.00 17.45           C  
ANISOU  379  CG1 VAL A  45     2818   1293   2520    224    243   -883       C  
ATOM    380  CG2 VAL A  45      -3.753  14.339  21.877  1.00 16.78           C  
ANISOU  380  CG2 VAL A  45     2867   1188   2322    301    -47   -944       C  
ATOM    381  N   GLU A  46      -2.063  10.379  20.114  1.00 19.97           N  
ANISOU  381  N   GLU A  46     3139   1686   2765    134    211   -675       N  
ATOM    382  CA  GLU A  46      -1.914   9.212  19.270  1.00 18.44           C  
ANISOU  382  CA  GLU A  46     2858   1509   2639     81    289   -640       C  
ATOM    383  C   GLU A  46      -3.123   9.022  18.345  1.00 20.92           C  
ANISOU  383  C   GLU A  46     3058   1809   3082     54    348   -715       C  
ATOM    384  O   GLU A  46      -4.278   9.084  18.784  1.00 19.08           O  
ANISOU  384  O   GLU A  46     2812   1534   2905     86    441   -775       O  
ATOM    385  CB  GLU A  46      -1.681   7.953  20.111  1.00 17.03           C  
ANISOU  385  CB  GLU A  46     2724   1319   2426    117    433   -580       C  
ATOM    386  CG  GLU A  46      -1.377   6.730  19.249  1.00 16.75           C  
ANISOU  386  CG  GLU A  46     2590   1290   2484     65    492   -555       C  
ATOM    387  CD  GLU A  46      -1.082   5.488  20.060  1.00 19.22           C  
ANISOU  387  CD  GLU A  46     2939   1575   2790     97    622   -480       C  
ATOM    388  OE1 GLU A  46      -1.035   5.580  21.305  1.00 21.13           O  
ANISOU  388  OE1 GLU A  46     3302   1806   2921    168    666   -432       O  
ATOM    389  OE2 GLU A  46      -0.904   4.415  19.452  1.00 22.91           O1-
ANISOU  389  OE2 GLU A  46     3316   2031   3359     61    677   -470       O1-
ATOM    390  N   LEU A  47      -2.836   8.793  17.067  1.00 19.06           N  
ANISOU  390  N   LEU A  47     2738   1609   2893      4    289   -718       N  
ATOM    391  CA  LEU A  47      -3.864   8.632  16.042  1.00 21.80           C  
ANISOU  391  CA  LEU A  47     2980   1951   3353     -9    296   -805       C  
ATOM    392  C   LEU A  47      -4.330   7.183  15.899  1.00 20.66           C  
ANISOU  392  C   LEU A  47     2749   1776   3325     -8    432   -844       C  
ATOM    393  O   LEU A  47      -3.521   6.252  15.969  1.00 19.02           O  
ANISOU  393  O   LEU A  47     2541   1582   3102    -19    480   -791       O  
ATOM    394  CB  LEU A  47      -3.340   9.116  14.687  1.00 24.10           C  
ANISOU  394  CB  LEU A  47     3236   2309   3612    -38    159   -792       C  
ATOM    395  CG  LEU A  47      -3.149  10.622  14.477  1.00 23.17           C  
ANISOU  395  CG  LEU A  47     3160   2198   3445    -44     15   -757       C  
ATOM    396  CD1 LEU A  47      -2.434  10.897  13.157  1.00 21.11           C  
ANISOU  396  CD1 LEU A  47     2872   2012   3138    -68    -76   -697       C  
ATOM    397  CD2 LEU A  47      -4.487  11.351  14.511  1.00 26.04           C  
ANISOU  397  CD2 LEU A  47     3500   2509   3885    -19    -14   -849       C  
ATOM    398  N   GLN A  48      -5.636   7.006  15.689  1.00 15.64           N  
ANISOU  398  N   GLN A  48     2446   1387   2109   -141    393    633       N  
ATOM    399  CA  GLN A  48      -6.194   5.699  15.356  1.00 22.02           C  
ANISOU  399  CA  GLN A  48     3255   2076   3034   -196    475    644       C  
ATOM    400  C   GLN A  48      -6.805   5.706  13.952  1.00 19.26           C  
ANISOU  400  C   GLN A  48     2864   1719   2733   -299    464    537       C  
ATOM    401  O   GLN A  48      -7.216   6.750  13.442  1.00 18.47           O  
ANISOU  401  O   GLN A  48     2739   1727   2553   -314    411    510       O  
ATOM    402  CB  GLN A  48      -7.250   5.280  16.386  1.00 26.61           C  
ANISOU  402  CB  GLN A  48     3834   2623   3654   -192    562    737       C  
ATOM    403  N   GLU A  49      -6.842   4.533  13.332  1.00 20.68           N  
ANISOU  403  N   GLU A  49     3010   1793   3056   -354    520    461       N  
ATOM    404  CA  GLU A  49      -7.560   4.317  12.086  1.00 20.43           C  
ANISOU  404  CA  GLU A  49     2872   1828   3064   -423    507    275       C  
ATOM    405  C   GLU A  49      -9.009   4.795  12.262  1.00 21.80           C  
ANISOU  405  C   GLU A  49     3003   2063   3217   -467    518    258       C  
ATOM    406  O   GLU A  49      -9.640   4.495  13.266  1.00 22.20           O  
ANISOU  406  O   GLU A  49     3079   2011   3346   -485    593    345       O  
ATOM    407  CB  GLU A  49      -7.538   2.821  11.764  1.00 26.21           C  
ANISOU  407  CB  GLU A  49     3532   2404   4024   -474    592    151       C  
ATOM    408  CG  GLU A  49      -7.097   2.441  10.365  1.00 29.95           C  
ANISOU  408  CG  GLU A  49     3901   2971   4507   -489    544    -70       C  
ATOM    409  CD  GLU A  49      -5.669   2.868  10.042  1.00 28.04           C  
ANISOU  409  CD  GLU A  49     3725   2797   4132   -416    473     -9       C  
ATOM    410  OE1 GLU A  49      -4.713   2.086  10.260  1.00 30.44           O  
ANISOU  410  OE1 GLU A  49     4059   2962   4546   -398    507      9       O  
ATOM    411  OE2 GLU A  49      -5.508   3.988   9.548  1.00 27.17           O1-
ANISOU  411  OE2 GLU A  49     3624   2873   3829   -373    396     27       O1-
ATOM    412  N   SER A  50      -9.529   5.554  11.302  1.00 18.96           N  
ANISOU  412  N   SER A  50     2573   1890   2741   -466    450    167       N  
ATOM    413  CA  SER A  50     -10.913   6.026  11.370  1.00 19.17           C  
ANISOU  413  CA  SER A  50     2545   1996   2741   -498    452    136       C  
ATOM    414  C   SER A  50     -11.409   6.439   9.996  1.00 17.04           C  
ANISOU  414  C   SER A  50     2150   1967   2358   -474    388     -7       C  
ATOM    415  O   SER A  50     -10.701   6.294   9.011  1.00 14.55           O  
ANISOU  415  O   SER A  50     1784   1764   1981   -432    351    -82       O  
ATOM    416  CB  SER A  50     -11.042   7.208  12.331  1.00 19.31           C  
ANISOU  416  CB  SER A  50     2646   2026   2665   -459    432    310       C  
ATOM    417  OG  SER A  50     -10.355   8.334  11.809  1.00 19.60           O  
ANISOU  417  OG  SER A  50     2691   2174   2581   -390    366    373       O  
ATOM    418  N   SER A  51     -12.629   6.962   9.929  1.00 17.51           N  
ANISOU  418  N   SER A  51     2147   2137   2368   -482    377    -38       N  
ATOM    419  CA  SER A  51     -13.151   7.432   8.657  1.00 21.19           C  
ANISOU  419  CA  SER A  51     2477   2891   2684   -418    317   -146       C  
ATOM    420  C   SER A  51     -12.335   8.621   8.149  1.00 20.56           C  
ANISOU  420  C   SER A  51     2432   2945   2436   -302    274     40       C  
ATOM    421  O   SER A  51     -12.347   8.921   6.958  1.00 18.45           O  
ANISOU  421  O   SER A  51     2051   2940   2018   -207    238      3       O  
ATOM    422  CB  SER A  51     -14.608   7.833   8.795  1.00 24.59           C  
ANISOU  422  CB  SER A  51     2837   3412   3095   -435    316   -192       C  
ATOM    423  OG  SER A  51     -14.716   8.933   9.665  1.00 27.24           O  
ANISOU  423  OG  SER A  51     3279   3677   3395   -413    317     26       O  
ATOM    424  N   LYS A  52     -11.635   9.285   9.068  1.00 19.56           N  
ANISOU  424  N   LYS A  52     2436   2648   2348   -297    290    233       N  
ATOM    425  CA  LYS A  52     -10.865  10.503   8.785  1.00 23.33           C  
ANISOU  425  CA  LYS A  52     2933   3175   2755   -203    283    416       C  
ATOM    426  C   LYS A  52      -9.375  10.227   8.535  1.00 22.14           C  
ANISOU  426  C   LYS A  52     2829   2967   2618   -180    284    444       C  
ATOM    427  O   LYS A  52      -8.705  10.934   7.771  1.00 23.70           O  
ANISOU  427  O   LYS A  52     2988   3266   2750    -91    292    550       O  
ATOM    428  CB  LYS A  52     -11.000  11.455   9.980  1.00 25.91           C  
ANISOU  428  CB  LYS A  52     3334   3353   3159   -216    302    545       C  
ATOM    429  CG  LYS A  52     -10.009  12.604   9.990  1.00 25.56           C  
ANISOU  429  CG  LYS A  52     3300   3258   3152   -147    321    698       C  
ATOM    430  CD  LYS A  52     -10.344  13.604   8.918  1.00 24.54           C  
ANISOU  430  CD  LYS A  52     3066   3296   2961    -41    347    822       C  
ATOM    431  CE  LYS A  52     -10.697  14.949   9.520  1.00 24.86           C  
ANISOU  431  CE  LYS A  52     3083   3242   3120    -15    388    945       C  
ATOM    432  NZ  LYS A  52     -10.876  15.983   8.463  1.00 21.78           N1+
ANISOU  432  NZ  LYS A  52     2580   2985   2709    118    448   1133       N1+
ATOM    433  N   ILE A  53      -8.864   9.194   9.194  1.00 15.33           N  
ANISOU  433  N   ILE A  53     2039   1937   1851   -250    292    368       N  
ATOM    434  CA  ILE A  53      -7.433   8.932   9.255  1.00 13.67           C  
ANISOU  434  CA  ILE A  53     1888   1635   1672   -234    292    398       C  
ATOM    435  C   ILE A  53      -7.185   7.506   8.802  1.00 14.05           C  
ANISOU  435  C   ILE A  53     1906   1665   1770   -275    295    232       C  
ATOM    436  O   ILE A  53      -7.773   6.570   9.343  1.00 12.80           O  
ANISOU  436  O   ILE A  53     1750   1388   1724   -344    329    147       O  
ATOM    437  CB  ILE A  53      -6.931   9.053  10.708  1.00 17.42           C  
ANISOU  437  CB  ILE A  53     2469   1919   2229   -252    306    478       C  
ATOM    438  CG1 ILE A  53      -6.972  10.517  11.175  1.00 18.12           C  
ANISOU  438  CG1 ILE A  53     2556   2010   2318   -213    305    589       C  
ATOM    439  CG2 ILE A  53      -5.548   8.398  10.891  1.00 15.15           C  
ANISOU  439  CG2 ILE A  53     2238   1537   1983   -238    304    470       C  
ATOM    440  CD1 ILE A  53      -6.080  11.452  10.388  1.00 17.59           C  
ANISOU  440  CD1 ILE A  53     2441   1992   2253   -144    313    661       C  
ATOM    441  N   HIS A  54      -6.333   7.344   7.803  1.00 10.47           N  
ANISOU  441  N   HIS A  54     1403   1318   1256   -228    276    185       N  
ATOM    442  CA  HIS A  54      -5.968   6.018   7.345  1.00 18.12           C  
ANISOU  442  CA  HIS A  54     2322   2261   2300   -264    280     -1       C  
ATOM    443  C   HIS A  54      -4.448   5.909   7.165  1.00 20.41           C  
ANISOU  443  C   HIS A  54     2660   2505   2588   -225    272     41       C  
ATOM    444  O   HIS A  54      -3.866   6.570   6.298  1.00 18.98           O  
ANISOU  444  O   HIS A  54     2436   2494   2280   -151    254     91       O  
ATOM    445  CB  HIS A  54      -6.684   5.706   6.033  1.00 19.55           C  
ANISOU  445  CB  HIS A  54     2327   2710   2390   -240    254   -206       C  
ATOM    446  CG  HIS A  54      -6.341   4.362   5.471  1.00 30.00           C  
ANISOU  446  CG  HIS A  54     3553   4022   3824   -279    259   -463       C  
ATOM    447  CD2 HIS A  54      -5.791   4.003   4.287  1.00 32.15           C  
ANISOU  447  CD2 HIS A  54     3698   4510   4007   -225    225   -629       C  
ATOM    448  ND1 HIS A  54      -6.556   3.189   6.164  1.00 30.41           N  
ANISOU  448  ND1 HIS A  54     3611   3809   4133   -379    319   -577       N  
ATOM    449  CE1 HIS A  54      -6.156   2.167   5.430  1.00 32.87           C  
ANISOU  449  CE1 HIS A  54     3800   4144   4547   -395    323   -822       C  
ATOM    450  NE2 HIS A  54      -5.685   2.634   4.288  1.00 35.21           N  
ANISOU  450  NE2 HIS A  54     4013   4747   4619   -304    256   -876       N  
ATOM    451  N   TYR A  55      -3.794   5.090   7.987  1.00 16.94           N  
ANISOU  451  N   TYR A  55     2302   1845   2290   -262    297     41       N  
ATOM    452  CA  TYR A  55      -2.367   4.863   7.778  1.00 16.91           C  
ANISOU  452  CA  TYR A  55     2328   1805   2292   -225    285     49       C  
ATOM    453  C   TYR A  55      -2.082   3.416   7.384  1.00 20.61           C  
ANISOU  453  C   TYR A  55     2735   2198   2899   -262    306   -139       C  
ATOM    454  O   TYR A  55      -2.846   2.503   7.694  1.00 19.88           O  
ANISOU  454  O   TYR A  55     2604   1983   2969   -323    356   -236       O  
ATOM    455  CB  TYR A  55      -1.523   5.288   8.983  1.00 14.68           C  
ANISOU  455  CB  TYR A  55     2170   1371   2038   -197    289    210       C  
ATOM    456  CG  TYR A  55      -2.016   4.765  10.314  1.00 20.30           C  
ANISOU  456  CG  TYR A  55     2949   1918   2848   -219    329    275       C  
ATOM    457  CD1 TYR A  55      -1.716   3.482  10.732  1.00 22.58           C  
ANISOU  457  CD1 TYR A  55     3252   2048   3278   -226    380    253       C  
ATOM    458  CD2 TYR A  55      -2.775   5.563  11.152  1.00 22.99           C  
ANISOU  458  CD2 TYR A  55     3323   2267   3145   -218    331    374       C  
ATOM    459  CE1 TYR A  55      -2.157   3.006  11.955  1.00 31.39           C  
ANISOU  459  CE1 TYR A  55     4417   3033   4476   -216    445    368       C  
ATOM    460  CE2 TYR A  55      -3.216   5.103  12.369  1.00 28.48           C  
ANISOU  460  CE2 TYR A  55     4067   2856   3898   -216    378    453       C  
ATOM    461  CZ  TYR A  55      -2.909   3.824  12.770  1.00 32.64           C  
ANISOU  461  CZ  TYR A  55     4609   3241   4551   -207    441    469       C  
ATOM    462  OH  TYR A  55      -3.359   3.366  13.988  1.00 38.46           O  
ANISOU  462  OH  TYR A  55     5372   3909   5333   -170    513    590       O  
ATOM    463  N   THR A  56      -0.973   3.225   6.690  1.00 20.03           N  
ANISOU  463  N   THR A  56     2635   2184   2791   -224    283   -196       N  
ATOM    464  CA  THR A  56      -0.590   1.912   6.222  1.00 17.98           C  
ANISOU  464  CA  THR A  56     2294   1858   2679   -252    302   -401       C  
ATOM    465  C   THR A  56       0.868   1.689   6.559  1.00 17.72           C  
ANISOU  465  C   THR A  56     2343   1703   2685   -214    299   -325       C  
ATOM    466  O   THR A  56       1.604   2.625   6.874  1.00 14.83           O  
ANISOU  466  O   THR A  56     2063   1366   2204   -163    272   -162       O  
ATOM    467  CB  THR A  56      -0.737   1.793   4.697  1.00 21.25           C  
ANISOU  467  CB  THR A  56     2531   2562   2980   -229    262   -631       C  
ATOM    468  CG2 THR A  56      -2.154   2.089   4.270  1.00 27.00           C  
ANISOU  468  CG2 THR A  56     3151   3477   3629   -240    252   -724       C  
ATOM    469  OG1 THR A  56       0.150   2.723   4.071  1.00 24.15           O  
ANISOU  469  OG1 THR A  56     2912   3123   3139   -143    225   -516       O  
ATOM    470  N   ASN A  57       1.290   0.442   6.453  1.00 20.47           N  
ANISOU  470  N   ASN A  57     2642   1913   3223   -236    334   -467       N  
ATOM    471  CA  ASN A  57       2.639   0.066   6.819  1.00 21.84           C  
ANISOU  471  CA  ASN A  57     2884   1959   3456   -192    336   -404       C  
ATOM    472  C   ASN A  57       2.962  -1.205   6.063  1.00 17.79           C  
ANISOU  472  C   ASN A  57     2240   1389   3129   -220    363   -652       C  
ATOM    473  O   ASN A  57       2.479  -2.280   6.400  1.00 20.73           O  
ANISOU  473  O   ASN A  57     2557   1549   3770   -266    446   -731       O  
ATOM    474  CB  ASN A  57       2.704  -0.159   8.328  1.00 24.16           C  
ANISOU  474  CB  ASN A  57     3301   2025   3854   -166    389   -192       C  
ATOM    475  CG  ASN A  57       4.047  -0.674   8.791  1.00 29.50           C  
ANISOU  475  CG  ASN A  57     4031   2583   4595    -96    395   -127       C  
ATOM    476  ND2 ASN A  57       4.196  -0.812  10.107  1.00 31.92           N  
ANISOU  476  ND2 ASN A  57     4428   2764   4935    -29    436     76       N  
ATOM    477  OD1 ASN A  57       4.946  -0.930   7.987  1.00 29.43           O  
ANISOU  477  OD1 ASN A  57     3973   2624   4586    -86    363   -254       O  
ATOM    478  N   THR A  58       3.753  -1.071   5.014  1.00 18.06           N  
ANISOU  478  N   THR A  58     2203   1613   3045   -189    308   -782       N  
ATOM    479  CA  THR A  58       4.102  -2.211   4.192  1.00 20.75           C  
ANISOU  479  CA  THR A  58     2391   1944   3550   -210    322  -1066       C  
ATOM    480  C   THR A  58       5.611  -2.296   4.165  1.00 20.75           C  
ANISOU  480  C   THR A  58     2447   1910   3528   -154    298  -1017       C  
ATOM    481  O   THR A  58       6.261  -1.499   3.505  1.00 16.55           O  
ANISOU  481  O   THR A  58     1915   1607   2767   -105    241   -992       O  
ATOM    482  CB  THR A  58       3.571  -2.038   2.762  1.00 22.88           C  
ANISOU  482  CB  THR A  58     2467   2567   3658   -206    270  -1331       C  
ATOM    483  CG2 THR A  58       3.730  -3.335   1.962  1.00 23.97           C  
ANISOU  483  CG2 THR A  58     2395   2699   4012   -239    289  -1710       C  
ATOM    484  OG1 THR A  58       2.188  -1.647   2.808  1.00 29.28           O  
ANISOU  484  OG1 THR A  58     3240   3467   4417   -238    275  -1337       O  
ATOM    485  N   SER A  59       6.162  -3.239   4.920  1.00 22.24           N  
ANISOU  485  N   SER A  59     2678   1809   3963   -149    356   -978       N  
ATOM    486  CA  SER A  59       7.601  -3.491   4.906  1.00 25.53           C  
ANISOU  486  CA  SER A  59     3129   2180   4391    -91    335   -962       C  
ATOM    487  C   SER A  59       8.400  -2.217   5.141  1.00 22.53           C  
ANISOU  487  C   SER A  59     2874   1944   3741    -30    268   -761       C  
ATOM    488  O   SER A  59       9.441  -2.004   4.522  1.00 20.64           O  
ANISOU  488  O   SER A  59     2611   1824   3408      5    228   -818       O  
ATOM    489  CB  SER A  59       8.022  -4.134   3.577  1.00 28.34           C  
ANISOU  489  CB  SER A  59     3304   2674   4792   -108    312  -1288       C  
ATOM    490  OG  SER A  59       7.352  -5.368   3.367  1.00 29.53           O  
ANISOU  490  OG  SER A  59     3297   2662   5263   -171    386  -1534       O  
ATOM    491  N   GLY A  60       7.906  -1.365   6.027  1.00 19.05           N  
ANISOU  491  N   GLY A  60     2546   1489   3204    -19    266   -546       N  
ATOM    492  CA  GLY A  60       8.651  -0.175   6.392  1.00 19.30           C  
ANISOU  492  CA  GLY A  60     2667   1610   3058     34    222   -387       C  
ATOM    493  C   GLY A  60       8.212   1.071   5.656  1.00 17.77           C  
ANISOU  493  C   GLY A  60     2440   1641   2672     21    199   -359       C  
ATOM    494  O   GLY A  60       8.561   2.182   6.047  1.00 17.85           O  
ANISOU  494  O   GLY A  60     2503   1685   2594     50    189   -220       O  
ATOM    495  N   VAL A  61       7.462   0.893   4.580  1.00 16.06           N  
ANISOU  495  N   VAL A  61     2110   1587   2406    -10    201   -498       N  
ATOM    496  CA  VAL A  61       6.935   2.034   3.853  1.00 14.84           C  
ANISOU  496  CA  VAL A  61     1908   1673   2058     10    196   -431       C  
ATOM    497  C   VAL A  61       5.654   2.474   4.550  1.00 18.05           C  
ANISOU  497  C   VAL A  61     2365   2028   2467    -24    208   -328       C  
ATOM    498  O   VAL A  61       4.664   1.744   4.561  1.00 21.86           O  
ANISOU  498  O   VAL A  61     2802   2477   3029    -72    218   -443       O  
ATOM    499  CB  VAL A  61       6.609   1.693   2.394  1.00 13.13           C  
ANISOU  499  CB  VAL A  61     1520   1737   1731     29    185   -629       C  
ATOM    500  CG1 VAL A  61       6.088   2.942   1.670  1.00 14.06           C  
ANISOU  500  CG1 VAL A  61     1583   2136   1625     92    198   -491       C  
ATOM    501  CG2 VAL A  61       7.823   1.107   1.688  1.00 13.87           C  
ANISOU  501  CG2 VAL A  61     1545   1894   1831     60    174   -769       C  
ATOM    502  N   LEU A  62       5.688   3.657   5.150  1.00 17.67           N  
ANISOU  502  N   LEU A  62     2392   1959   2361     -2    215   -133       N  
ATOM    503  CA  LEU A  62       4.598   4.111   6.003  1.00 17.43           C  
ANISOU  503  CA  LEU A  62     2420   1860   2345    -31    224    -32       C  
ATOM    504  C   LEU A  62       3.887   5.259   5.337  1.00 18.35           C  
ANISOU  504  C   LEU A  62     2478   2166   2329     -6    239     57       C  
ATOM    505  O   LEU A  62       4.526   6.190   4.861  1.00 18.76           O  
ANISOU  505  O   LEU A  62     2500   2306   2322     46    264    161       O  
ATOM    506  CB  LEU A  62       5.138   4.595   7.345  1.00 16.08           C  
ANISOU  506  CB  LEU A  62     2352   1528   2229    -13    221     94       C  
ATOM    507  CG  LEU A  62       6.182   3.714   8.024  1.00 16.15           C  
ANISOU  507  CG  LEU A  62     2411   1395   2329     15    210     62       C  
ATOM    508  CD1 LEU A  62       6.617   4.371   9.328  1.00 16.25           C  
ANISOU  508  CD1 LEU A  62     2488   1345   2342     63    196    162       C  
ATOM    509  CD2 LEU A  62       5.600   2.343   8.263  1.00 14.09           C  
ANISOU  509  CD2 LEU A  62     2152   1014   2186    -14    237     -1       C  
ATOM    510  N   THR A  63       2.563   5.192   5.316  1.00 19.85           N  
ANISOU  510  N   THR A  63     2639   2409   2493    -36    238     31       N  
ATOM    511  CA  THR A  63       1.760   6.271   4.765  1.00 17.82           C  
ANISOU  511  CA  THR A  63     2323   2337   2111      6    255    137       C  
ATOM    512  C   THR A  63       0.702   6.698   5.763  1.00 17.29           C  
ANISOU  512  C   THR A  63     2319   2158   2093    -37    259    216       C  
ATOM    513  O   THR A  63       0.095   5.861   6.429  1.00 16.38           O  
ANISOU  513  O   THR A  63     2240   1921   2064    -99    250    131       O  
ATOM    514  CB  THR A  63       1.071   5.835   3.474  1.00 21.62           C  
ANISOU  514  CB  THR A  63     2656   3102   2457     40    240     -9       C  
ATOM    515  CG2 THR A  63       0.182   6.948   2.961  1.00 27.26           C  
ANISOU  515  CG2 THR A  63     3302   4030   3023    114    263    136       C  
ATOM    516  OG1 THR A  63       2.071   5.532   2.488  1.00 22.96           O  
ANISOU  516  OG1 THR A  63     2745   3427   2551     98    238    -82       O  
ATOM    517  N   LEU A  64       0.495   8.007   5.874  1.00 17.03           N  
ANISOU  517  N   LEU A  64     2286   2155   2032      1    289    385       N  
ATOM    518  CA  LEU A  64      -0.612   8.547   6.643  1.00 13.83           C  
ANISOU  518  CA  LEU A  64     1911   1691   1653    -28    293    449       C  
ATOM    519  C   LEU A  64      -1.474   9.401   5.732  1.00 18.27           C  
ANISOU  519  C   LEU A  64     2375   2465   2102     37    320    541       C  
ATOM    520  O   LEU A  64      -0.977  10.328   5.078  1.00 18.91           O  
ANISOU  520  O   LEU A  64     2397   2635   2153    119    374    690       O  
ATOM    521  CB  LEU A  64      -0.115   9.398   7.808  1.00 15.16           C  
ANISOU  521  CB  LEU A  64     2146   1682   1932    -33    308    546       C  
ATOM    522  CG  LEU A  64      -1.230  10.190   8.493  1.00 15.99           C  
ANISOU  522  CG  LEU A  64     2255   1759   2061    -49    319    612       C  
ATOM    523  CD1 LEU A  64      -2.136   9.247   9.271  1.00 15.47           C  
ANISOU  523  CD1 LEU A  64     2245   1637   1994   -110    288    529       C  
ATOM    524  CD2 LEU A  64      -0.651  11.276   9.411  1.00 16.15           C  
ANISOU  524  CD2 LEU A  64     2272   1659   2206    -32    339    657       C  
ATOM    525  N   GLU A  65      -2.758   9.072   5.661  1.00 15.86           N  
ANISOU  525  N   GLU A  65     2035   2248   1744     12    297    465       N  
ATOM    526  CA  GLU A  65      -3.697   9.888   4.907  1.00 15.80           C  
ANISOU  526  CA  GLU A  65     1927   2464   1613     92    317    558       C  
ATOM    527  C   GLU A  65      -4.661  10.592   5.844  1.00 16.95           C  
ANISOU  527  C   GLU A  65     2119   2490   1833     55    326    639       C  
ATOM    528  O   GLU A  65      -5.204   9.978   6.764  1.00 18.56           O  
ANISOU  528  O   GLU A  65     2388   2553   2111    -38    298    535       O  
ATOM    529  CB  GLU A  65      -4.488   9.054   3.894  1.00 17.16           C  
ANISOU  529  CB  GLU A  65     1971   2912   1636    119    275    367       C  
ATOM    530  CG  GLU A  65      -5.556   9.868   3.177  1.00 19.50           C  
ANISOU  530  CG  GLU A  65     2149   3486   1772    228    287    461       C  
ATOM    531  CD  GLU A  65      -6.450   9.018   2.306  1.00 28.81           C  
ANISOU  531  CD  GLU A  65     3172   4969   2806    256    231    204       C  
ATOM    532  OE1 GLU A  65      -6.531   7.801   2.547  1.00 28.67           O  
ANISOU  532  OE1 GLU A  65     3150   4848   2894    146    194    -63       O  
ATOM    533  OE2 GLU A  65      -7.078   9.568   1.379  1.00 31.78           O1-
ANISOU  533  OE2 GLU A  65     3406   5692   2976    399    233    263       O1-
ATOM    534  N   ILE A  66      -4.865  11.884   5.611  1.00 16.24           N  
ANISOU  534  N   ILE A  66     1688   1498   2984   -100    364    687       N  
ATOM    535  CA  ILE A  66      -5.923  12.626   6.288  1.00 16.94           C  
ANISOU  535  CA  ILE A  66     1854   1474   3108      4    434    747       C  
ATOM    536  C   ILE A  66      -6.957  13.069   5.246  1.00 20.28           C  
ANISOU  536  C   ILE A  66     2181   1943   3583     11    458    868       C  
ATOM    537  O   ILE A  66      -6.613  13.713   4.246  1.00 20.61           O  
ANISOU  537  O   ILE A  66     2166   2007   3660    -65    401    918       O  
ATOM    538  CB  ILE A  66      -5.375  13.882   7.040  1.00 17.02           C  
ANISOU  538  CB  ILE A  66     2007   1320   3139     54    382    675       C  
ATOM    539  CG1 ILE A  66      -4.196  13.510   7.950  1.00 17.75           C  
ANISOU  539  CG1 ILE A  66     2182   1388   3174     28    339    550       C  
ATOM    540  CG2 ILE A  66      -6.477  14.546   7.858  1.00 16.72           C  
ANISOU  540  CG2 ILE A  66     2038   1218   3097    246    435    659       C  
ATOM    541  CD1 ILE A  66      -2.834  13.866   7.374  1.00 16.36           C  
ANISOU  541  CD1 ILE A  66     2000   1187   3029   -126    234    549       C  
ATOM    542  N   LEU A  67      -8.218  12.720   5.473  1.00 17.52           N  
ANISOU  542  N   LEU A  67     1793   1628   3234     98    535    947       N  
ATOM    543  CA  LEU A  67      -9.284  13.053   4.530  1.00 16.20           C  
ANISOU  543  CA  LEU A  67     1523   1517   3114    111    559   1067       C  
ATOM    544  C   LEU A  67      -9.982  14.361   4.886  1.00 17.60           C  
ANISOU  544  C   LEU A  67     1775   1573   3338    232    595   1119       C  
ATOM    545  O   LEU A  67     -10.117  14.706   6.059  1.00 21.83           O  
ANISOU  545  O   LEU A  67     2407   2052   3834    379    622   1038       O  
ATOM    546  CB  LEU A  67     -10.317  11.919   4.445  1.00 15.40           C  
ANISOU  546  CB  LEU A  67     1307   1538   3005    143    583   1134       C  
ATOM    547  CG  LEU A  67      -9.881  10.572   3.843  1.00 17.73           C  
ANISOU  547  CG  LEU A  67     1532   1912   3292     72    473   1072       C  
ATOM    548  CD1 LEU A  67      -8.966   9.799   4.799  1.00 17.91           C  
ANISOU  548  CD1 LEU A  67     1615   1905   3287     52    447    969       C  
ATOM    549  CD2 LEU A  67     -11.083   9.717   3.479  1.00 20.95           C  
ANISOU  549  CD2 LEU A  67     1833   2382   3745     86    442   1186       C  
ATOM    550  N   ASP A  68     -10.414  15.082   3.860  1.00 16.08           N  
ANISOU  550  N   ASP A  68     1520   1368   3222    193    576   1231       N  
ATOM    551  CA  ASP A  68     -11.308  16.219   4.031  1.00 19.26           C  
ANISOU  551  CA  ASP A  68     1956   1669   3692    332    592   1283       C  
ATOM    552  C   ASP A  68     -10.746  17.207   5.043  1.00 21.63           C  
ANISOU  552  C   ASP A  68     2420   1775   4024    447    521   1137       C  
ATOM    553  O   ASP A  68     -11.377  17.519   6.054  1.00 23.35           O  
ANISOU  553  O   ASP A  68     2707   1968   4198    660    562   1054       O  
ATOM    554  CB  ASP A  68     -12.699  15.726   4.448  1.00 19.69           C  
ANISOU  554  CB  ASP A  68     1943   1844   3693    473    707   1355       C  
ATOM    555  CG  ASP A  68     -13.748  16.803   4.356  1.00 24.84           C  
ANISOU  555  CG  ASP A  68     2588   2439   4410    623    729   1429       C  
ATOM    556  OD1 ASP A  68     -13.447  17.892   3.809  1.00 26.00           O  
ANISOU  556  OD1 ASP A  68     2773   2428   4676    592    637   1443       O  
ATOM    557  OD2 ASP A  68     -14.878  16.552   4.821  1.00 26.24           O1-
ANISOU  557  OD2 ASP A  68     2705   2738   4529    771    827   1494       O1-
ATOM    558  N   CYS A  69      -9.559  17.717   4.736  1.00 23.09           N  
ANISOU  558  N   CYS A  69     2653   1842   4279    313    397   1110       N  
ATOM    559  CA  CYS A  69      -8.784  18.505   5.681  1.00 24.48           C  
ANISOU  559  CA  CYS A  69     2989   1815   4497    381    283    957       C  
ATOM    560  C   CYS A  69      -9.434  19.823   6.051  1.00 26.29           C  
ANISOU  560  C   CYS A  69     3308   1832   4847    565    197    910       C  
ATOM    561  O   CYS A  69      -9.836  20.597   5.184  1.00 28.71           O  
ANISOU  561  O   CYS A  69     3557   2050   5300    523    131   1052       O  
ATOM    562  CB  CYS A  69      -7.381  18.755   5.129  1.00 18.36           C  
ANISOU  562  CB  CYS A  69     2208    977   3792    163    148    998       C  
ATOM    563  SG  CYS A  69      -6.390  17.266   5.049  1.00 23.84           S  
ANISOU  563  SG  CYS A  69     2837   1893   4328     19    216    959       S  
ATOM    564  N   HIS A  70      -9.528  20.080   7.347  1.00 26.17           N  
ANISOU  564  N   HIS A  70     3428   1746   4768    786    184    704       N  
ATOM    565  CA  HIS A  70     -10.003  21.370   7.819  1.00 28.76           C  
ANISOU  565  CA  HIS A  70     3867   1850   5211   1008     56    586       C  
ATOM    566  C   HIS A  70      -8.998  21.974   8.792  1.00 30.94           C  
ANISOU  566  C   HIS A  70     4323   1909   5523   1071   -127    357       C  
ATOM    567  O   HIS A  70      -7.950  21.384   9.061  1.00 27.94           O  
ANISOU  567  O   HIS A  70     3969   1573   5073    924   -134    321       O  
ATOM    568  CB  HIS A  70     -11.386  21.236   8.449  1.00 34.54           C  
ANISOU  568  CB  HIS A  70     4568   2749   5806   1305    207    530       C  
ATOM    569  CG  HIS A  70     -12.466  20.931   7.460  1.00 41.85           C  
ANISOU  569  CG  HIS A  70     5327   3824   6749   1256    335    763       C  
ATOM    570  CD2 HIS A  70     -12.968  19.750   7.022  1.00 43.89           C  
ANISOU  570  CD2 HIS A  70     5434   4348   6893   1150    508    928       C  
ATOM    571  ND1 HIS A  70     -13.162  21.913   6.786  1.00 47.78           N  
ANISOU  571  ND1 HIS A  70     6052   4433   7670   1314    261    852       N  
ATOM    572  CE1 HIS A  70     -14.046  21.354   5.980  1.00 48.03           C  
ANISOU  572  CE1 HIS A  70     5920   4659   7669   1246    403   1063       C  
ATOM    573  NE2 HIS A  70     -13.947  20.041   6.103  1.00 47.33           N  
ANISOU  573  NE2 HIS A  70     5757   4811   7414   1145    544   1106       N  
ATOM    574  N   THR A  71      -9.312  23.153   9.316  1.00 33.19           N  
ANISOU  574  N   THR A  71     4733   1953   5926   1298   -297    189       N  
ATOM    575  CA  THR A  71      -8.372  23.867  10.168  1.00 34.98           C  
ANISOU  575  CA  THR A  71     5141   1921   6229   1360   -533    -43       C  
ATOM    576  C   THR A  71      -7.858  23.008  11.315  1.00 33.06           C  
ANISOU  576  C   THR A  71     4956   1876   5729   1433   -428   -225       C  
ATOM    577  O   THR A  71      -6.679  23.067  11.647  1.00 31.88           O  
ANISOU  577  O   THR A  71     4896   1601   5618   1303   -568   -301       O  
ATOM    578  CB  THR A  71      -8.983  25.157  10.723  1.00 41.05           C  
ANISOU  578  CB  THR A  71     6043   2423   7131   1681   -737   -267       C  
ATOM    579  CG2 THR A  71      -7.929  25.963  11.464  1.00 42.41           C  
ANISOU  579  CG2 THR A  71     6408   2267   7438   1710  -1050   -504       C  
ATOM    580  OG1 THR A  71      -9.497  25.934   9.635  1.00 46.28           O  
ANISOU  580  OG1 THR A  71     6636   2897   8053   1603   -841    -67       O  
ATOM    581  N   ASP A  72      -8.742  22.214  11.914  1.00 33.10           N  
ANISOU  581  N   ASP A  72     4892   2204   5481   1630   -193   -261       N  
ATOM    582  CA  ASP A  72      -8.373  21.369  13.044  1.00 34.29           C  
ANISOU  582  CA  ASP A  72     5065   2586   5379   1712    -88   -394       C  
ATOM    583  C   ASP A  72      -7.268  20.401  12.669  1.00 28.57           C  
ANISOU  583  C   ASP A  72     4292   1917   4645   1380    -46   -258       C  
ATOM    584  O   ASP A  72      -6.518  19.947  13.525  1.00 30.24           O  
ANISOU  584  O   ASP A  72     4560   2199   4730   1379    -51   -375       O  
ATOM    585  CB  ASP A  72      -9.574  20.566  13.542  1.00 41.33           C  
ANISOU  585  CB  ASP A  72     5822   3863   6020   1918    163   -339       C  
ATOM    586  CG  ASP A  72     -10.473  21.367  14.456  1.00 55.05           C  
ANISOU  586  CG  ASP A  72     7612   5664   7642   2343    139   -563       C  
ATOM    587  OD1 ASP A  72     -10.089  22.493  14.849  1.00 58.59           O  
ANISOU  587  OD1 ASP A  72     8231   5832   8197   2500    -95   -822       O  
ATOM    588  OD2 ASP A  72     -11.563  20.856  14.793  1.00 60.52           O1-
ANISOU  588  OD2 ASP A  72     8161   6699   8134   2530    336   -480       O1-
ATOM    589  N   ASP A  73      -7.183  20.077  11.385  1.00 27.29           N  
ANISOU  589  N   ASP A  73     4015   1750   4605   1118     -8    -17       N  
ATOM    590  CA  ASP A  73      -6.212  19.099  10.902  1.00 25.33           C  
ANISOU  590  CA  ASP A  73     3694   1595   4334    837     35    105       C  
ATOM    591  C   ASP A  73      -4.819  19.677  10.701  1.00 25.17           C  
ANISOU  591  C   ASP A  73     3754   1355   4455    646   -171     84       C  
ATOM    592  O   ASP A  73      -3.869  18.943  10.447  1.00 26.28           O  
ANISOU  592  O   ASP A  73     3843   1583   4558    446   -152    149       O  
ATOM    593  CB  ASP A  73      -6.727  18.440   9.622  1.00 23.61           C  
ANISOU  593  CB  ASP A  73     3302   1520   4147    674    156    343       C  
ATOM    594  CG  ASP A  73      -8.065  17.761   9.834  1.00 26.81           C  
ANISOU  594  CG  ASP A  73     3611   2150   4426    829    342    402       C  
ATOM    595  OD1 ASP A  73      -8.173  16.987  10.812  1.00 23.84           O  
ANISOU  595  OD1 ASP A  73     3228   1944   3885    928    435    341       O  
ATOM    596  OD2 ASP A  73      -9.016  18.031   9.058  1.00 26.99           O1-
ANISOU  596  OD2 ASP A  73     3549   2188   4517    850    384    531       O1-
ATOM    597  N   SER A  74      -4.696  20.996  10.812  1.00 29.12           N  
ANISOU  597  N   SER A  74     4369   1564   5131    711   -389      1       N  
ATOM    598  CA  SER A  74      -3.386  21.631  10.730  1.00 28.60           C  
ANISOU  598  CA  SER A  74     4373   1267   5225    525   -628      5       C  
ATOM    599  C   SER A  74      -2.525  21.210  11.915  1.00 28.48           C  
ANISOU  599  C   SER A  74     4468   1286   5068    567   -651   -194       C  
ATOM    600  O   SER A  74      -3.036  20.707  12.921  1.00 24.96           O  
ANISOU  600  O   SER A  74     4065   1001   4418    789   -521   -365       O  
ATOM    601  CB  SER A  74      -3.521  23.155  10.703  1.00 31.90           C  
ANISOU  601  CB  SER A  74     4899   1317   5904    602   -910    -49       C  
ATOM    602  OG  SER A  74      -4.057  23.587   9.466  1.00 33.27           O  
ANISOU  602  OG  SER A  74     4948   1447   6246    491   -925    198       O  
ATOM    603  N   GLY A  75      -1.217  21.417  11.792  1.00 29.12           N  
ANISOU  603  N   GLY A  75     4571   1244   5250    349   -820   -144       N  
ATOM    604  CA  GLY A  75      -0.306  21.169  12.893  1.00 29.08           C  
ANISOU  604  CA  GLY A  75     4676   1233   5140    371   -883   -326       C  
ATOM    605  C   GLY A  75       0.679  20.039  12.644  1.00 28.18           C  
ANISOU  605  C   GLY A  75     4455   1339   4914    149   -768   -201       C  
ATOM    606  O   GLY A  75       0.977  19.696  11.499  1.00 26.56           O  
ANISOU  606  O   GLY A  75     4096   1238   4758    -60   -718     28       O  
ATOM    607  N   THR A  76       1.188  19.461  13.730  1.00 19.00           N  
ANISOU  607  N   THR A  76     3363    266   3589    215   -733   -362       N  
ATOM    608  CA  THR A  76       2.297  18.528  13.646  1.00 19.07           C  
ANISOU  608  CA  THR A  76     3296    430   3521     19   -680   -277       C  
ATOM    609  C   THR A  76       1.798  17.096  13.579  1.00 22.89           C  
ANISOU  609  C   THR A  76     3658   1213   3824     50   -418   -227       C  
ATOM    610  O   THR A  76       0.994  16.678  14.417  1.00 22.38           O  
ANISOU  610  O   THR A  76     3623   1264   3618    248   -299   -334       O  
ATOM    611  CB  THR A  76       3.209  18.652  14.875  1.00 24.87           C  
ANISOU  611  CB  THR A  76     4166   1090   4193     53   -809   -461       C  
ATOM    612  CG2 THR A  76       4.385  17.709  14.759  1.00 28.73           C  
ANISOU  612  CG2 THR A  76     4564   1736   4614   -147   -762   -360       C  
ATOM    613  OG1 THR A  76       3.685  19.996  14.981  1.00 30.17           O  
ANISOU  613  OG1 THR A  76     4958   1438   5065     22  -1107   -519       O  
ATOM    614  N   TYR A  77       2.283  16.357  12.581  1.00 18.21           N  
ANISOU  614  N   TYR A  77     2917    759   3242   -138   -353    -58       N  
ATOM    615  CA  TYR A  77       2.076  14.922  12.501  1.00 16.72           C  
ANISOU  615  CA  TYR A  77     2619    808   2927   -137   -173    -23       C  
ATOM    616  C   TYR A  77       3.396  14.237  12.756  1.00 19.75           C  
ANISOU  616  C   TYR A  77     2978   1267   3259   -261   -208    -33       C  
ATOM    617  O   TYR A  77       4.417  14.614  12.190  1.00 22.42           O  
ANISOU  617  O   TYR A  77     3279   1574   3665   -420   -317     44       O  
ATOM    618  CB  TYR A  77       1.496  14.532  11.144  1.00 17.13           C  
ANISOU  618  CB  TYR A  77     2517    971   3021   -204    -88    130       C  
ATOM    619  CG  TYR A  77       0.065  14.980  11.033  1.00 19.15           C  
ANISOU  619  CG  TYR A  77     2785   1188   3304    -62    -23    144       C  
ATOM    620  CD1 TYR A  77      -0.978  14.148  11.417  1.00 20.54           C  
ANISOU  620  CD1 TYR A  77     2921   1496   3389     65    121    138       C  
ATOM    621  CD2 TYR A  77      -0.242  16.267  10.606  1.00 17.75           C  
ANISOU  621  CD2 TYR A  77     2650    836   3257    -54   -126    181       C  
ATOM    622  CE1 TYR A  77      -2.303  14.584  11.346  1.00 21.78           C  
ANISOU  622  CE1 TYR A  77     3072   1645   3559    206    184    166       C  
ATOM    623  CE2 TYR A  77      -1.541  16.704  10.536  1.00 19.37           C  
ANISOU  623  CE2 TYR A  77     2864   1006   3488     96    -72    186       C  
ATOM    624  CZ  TYR A  77      -2.567  15.871  10.898  1.00 20.05           C  
ANISOU  624  CZ  TYR A  77     2905   1256   3458    230     93    176       C  
ATOM    625  OH  TYR A  77      -3.859  16.339  10.815  1.00 24.36           O  
ANISOU  625  OH  TYR A  77     3442   1794   4021    384    149    199       O  
ATOM    626  N   ARG A  78       3.382  13.250  13.639  1.00 13.26           N  
ANISOU  626  N   ARG A  78     2161    558   2319   -190   -123   -103       N  
ATOM    627  CA  ARG A  78       4.620  12.619  14.060  1.00 16.65           C  
ANISOU  627  CA  ARG A  78     2580   1045   2700   -285   -163   -127       C  
ATOM    628  C   ARG A  78       4.506  11.104  14.007  1.00 16.94           C  
ANISOU  628  C   ARG A  78     2501   1254   2681   -284    -56    -90       C  
ATOM    629  O   ARG A  78       3.529  10.526  14.486  1.00 16.83           O  
ANISOU  629  O   ARG A  78     2468   1305   2621   -175     36    -82       O  
ATOM    630  CB  ARG A  78       4.991  13.076  15.474  1.00 20.51           C  
ANISOU  630  CB  ARG A  78     3216   1458   3120   -203   -237   -269       C  
ATOM    631  CG  ARG A  78       6.196  12.358  16.067  1.00 22.33           C  
ANISOU  631  CG  ARG A  78     3435   1762   3288   -289   -269   -289       C  
ATOM    632  CD  ARG A  78       6.393  12.734  17.521  1.00 27.03           C  
ANISOU  632  CD  ARG A  78     4166   2322   3782   -181   -331   -438       C  
ATOM    633  NE  ARG A  78       6.484  14.181  17.690  1.00 36.81           N  
ANISOU  633  NE  ARG A  78     5546   3346   5094   -149   -498   -542       N  
ATOM    634  CZ  ARG A  78       7.587  14.894  17.465  1.00 40.98           C  
ANISOU  634  CZ  ARG A  78     6118   3720   5732   -303   -682   -525       C  
ATOM    635  NH1 ARG A  78       8.690  14.290  17.049  1.00 39.78           N1+
ANISOU  635  NH1 ARG A  78     5867   3654   5593   -485   -690   -408       N1+
ATOM    636  NH2 ARG A  78       7.589  16.212  17.650  1.00 44.44           N  
ANISOU  636  NH2 ARG A  78     6688   3918   6278   -271   -880   -616       N  
ATOM    637  N   ALA A  79       5.493  10.465  13.390  1.00 15.05           N  
ANISOU  637  N   ALA A  79     2167   1097   2453   -400    -87    -53       N  
ATOM    638  CA  ALA A  79       5.573   9.021  13.413  1.00 15.72           C  
ANISOU  638  CA  ALA A  79     2152   1307   2512   -386    -43    -48       C  
ATOM    639  C   ALA A  79       6.726   8.652  14.322  1.00 16.69           C  
ANISOU  639  C   ALA A  79     2309   1446   2587   -426    -96    -96       C  
ATOM    640  O   ALA A  79       7.799   9.279  14.274  1.00 16.42           O  
ANISOU  640  O   ALA A  79     2299   1402   2537   -501   -175   -101       O  
ATOM    641  CB  ALA A  79       5.782   8.460  12.004  1.00 15.85           C  
ANISOU  641  CB  ALA A  79     2022   1450   2552   -415    -50    -10       C  
ATOM    642  N   VAL A  80       6.494   7.663  15.176  1.00 15.55           N  
ANISOU  642  N   VAL A  80     2152   1335   2422   -381    -65   -100       N  
ATOM    643  CA  VAL A  80       7.511   7.220  16.114  1.00 16.26           C  
ANISOU  643  CA  VAL A  80     2262   1452   2463   -414   -113   -130       C  
ATOM    644  C   VAL A  80       7.713   5.728  15.930  1.00 15.24           C  
ANISOU  644  C   VAL A  80     2009   1387   2393   -426   -130    -96       C  
ATOM    645  O   VAL A  80       6.781   4.941  16.074  1.00 13.23           O  
ANISOU  645  O   VAL A  80     1695   1146   2187   -376   -103    -31       O  
ATOM    646  CB  VAL A  80       7.120   7.528  17.573  1.00 19.17           C  
ANISOU  646  CB  VAL A  80     2724   1831   2730   -327    -88   -156       C  
ATOM    647  CG1 VAL A  80       8.137   6.923  18.525  1.00 18.77           C  
ANISOU  647  CG1 VAL A  80     2671   1835   2626   -367   -136   -166       C  
ATOM    648  CG2 VAL A  80       7.005   9.054  17.798  1.00 20.10           C  
ANISOU  648  CG2 VAL A  80     2984   1847   2807   -284   -123   -245       C  
ATOM    649  N   CYS A  81       8.932   5.350  15.578  1.00 17.08           N  
ANISOU  649  N   CYS A  81     2189   1687   2616   -456   -189   -120       N  
ATOM    650  CA  CYS A  81       9.242   3.966  15.271  1.00 18.66           C  
ANISOU  650  CA  CYS A  81     2276   1930   2883   -425   -240   -122       C  
ATOM    651  C   CYS A  81      10.123   3.398  16.360  1.00 18.44           C  
ANISOU  651  C   CYS A  81     2256   1907   2842   -458   -289   -115       C  
ATOM    652  O   CYS A  81      11.169   3.972  16.666  1.00 19.06           O  
ANISOU  652  O   CYS A  81     2381   2015   2845   -510   -307   -139       O  
ATOM    653  CB  CYS A  81       9.975   3.888  13.939  1.00 17.60           C  
ANISOU  653  CB  CYS A  81     2060   1880   2748   -417   -272   -174       C  
ATOM    654  SG  CYS A  81       9.024   4.549  12.544  1.00 18.20           S  
ANISOU  654  SG  CYS A  81     2101   1980   2833   -401   -226   -170       S  
ATOM    655  N   THR A  82       9.714   2.265  16.926  1.00 16.44           N  
ANISOU  655  N   THR A  82     1943   1623   2679   -445   -330    -59       N  
ATOM    656  CA  THR A  82      10.383   1.719  18.108  1.00 16.41           C  
ANISOU  656  CA  THR A  82     1932   1627   2674   -496   -378    -17       C  
ATOM    657  C   THR A  82      10.711   0.230  17.993  1.00 16.84           C  
ANISOU  657  C   THR A  82     1872   1649   2877   -467   -497     12       C  
ATOM    658  O   THR A  82       9.870  -0.564  17.578  1.00 17.10           O  
ANISOU  658  O   THR A  82     1831   1614   3051   -430   -555     58       O  
ATOM    659  CB  THR A  82       9.504   1.905  19.362  1.00 17.51           C  
ANISOU  659  CB  THR A  82     2104   1808   2742   -479   -317     96       C  
ATOM    660  CG2 THR A  82      10.227   1.396  20.601  1.00 18.94           C  
ANISOU  660  CG2 THR A  82     2263   2053   2878   -511   -360    163       C  
ATOM    661  OG1 THR A  82       9.199   3.299  19.532  1.00 21.45           O  
ANISOU  661  OG1 THR A  82     2727   2323   3099   -450   -232     33       O  
ATOM    662  N   ASN A  83      11.933  -0.136  18.366  1.00 16.85           N  
ANISOU  662  N   ASN A  83     1858   1677   2866   -485   -556    -15       N  
ATOM    663  CA  ASN A  83      12.301  -1.535  18.597  1.00 17.74           C  
ANISOU  663  CA  ASN A  83     1871   1729   3142   -469   -694     24       C  
ATOM    664  C   ASN A  83      13.222  -1.612  19.809  1.00 20.18           C  
ANISOU  664  C   ASN A  83     2184   2092   3394   -545   -715     85       C  
ATOM    665  O   ASN A  83      13.543  -0.576  20.399  1.00 21.47           O  
ANISOU  665  O   ASN A  83     2433   2334   3390   -606   -630     72       O  
ATOM    666  CB  ASN A  83      12.905  -2.210  17.351  1.00 15.24           C  
ANISOU  666  CB  ASN A  83     1490   1381   2919   -367   -788   -123       C  
ATOM    667  CG  ASN A  83      14.360  -1.820  17.078  1.00 19.19           C  
ANISOU  667  CG  ASN A  83     1992   2001   3299   -361   -768   -225       C  
ATOM    668  ND2 ASN A  83      14.881  -2.298  15.951  1.00 16.31           N  
ANISOU  668  ND2 ASN A  83     1546   1679   2973   -262   -837   -376       N  
ATOM    669  OD1 ASN A  83      15.008  -1.116  17.861  1.00 15.78           O  
ANISOU  669  OD1 ASN A  83     1619   1638   2737   -443   -707   -174       O  
ATOM    670  N   TYR A  84      13.647  -2.810  20.197  1.00 21.31           N  
ANISOU  670  N   TYR A  84     2231   2177   3687   -547   -849    147       N  
ATOM    671  CA  TYR A  84      14.402  -2.939  21.444  1.00 21.96           C  
ANISOU  671  CA  TYR A  84     2296   2330   3719   -630   -872    241       C  
ATOM    672  C   TYR A  84      15.746  -2.217  21.400  1.00 25.58           C  
ANISOU  672  C   TYR A  84     2824   2877   4019   -642   -827    127       C  
ATOM    673  O   TYR A  84      16.324  -1.920  22.442  1.00 26.51           O  
ANISOU  673  O   TYR A  84     2967   3076   4031   -715   -814    184       O  
ATOM    674  CB  TYR A  84      14.578  -4.406  21.852  1.00 26.34           C  
ANISOU  674  CB  TYR A  84     2716   2789   4501   -636  -1051    362       C  
ATOM    675  CG  TYR A  84      15.744  -5.126  21.202  1.00 25.49           C  
ANISOU  675  CG  TYR A  84     2572   2613   4499   -553  -1172    223       C  
ATOM    676  CD1 TYR A  84      16.974  -5.218  21.844  1.00 29.29           C  
ANISOU  676  CD1 TYR A  84     3038   3168   4924   -588  -1196    233       C  
ATOM    677  CD2 TYR A  84      15.606  -5.733  19.958  1.00 22.05           C  
ANISOU  677  CD2 TYR A  84     2101   2059   4217   -430  -1274     69       C  
ATOM    678  CE1 TYR A  84      18.042  -5.886  21.266  1.00 29.11           C  
ANISOU  678  CE1 TYR A  84     2958   3112   4992   -499  -1307    102       C  
ATOM    679  CE2 TYR A  84      16.657  -6.392  19.370  1.00 23.09           C  
ANISOU  679  CE2 TYR A  84     2175   2168   4431   -329  -1396    -93       C  
ATOM    680  CZ  TYR A  84      17.883  -6.467  20.026  1.00 27.98           C  
ANISOU  680  CZ  TYR A  84     2770   2871   4989   -360  -1408    -72       C  
ATOM    681  OH  TYR A  84      18.942  -7.141  19.447  1.00 25.94           O  
ANISOU  681  OH  TYR A  84     2431   2621   4804   -239  -1535   -239       O  
ATOM    682  N   LYS A  85      16.235  -1.919  20.198  1.00 27.96           N  
ANISOU  682  N   LYS A  85     3141   3190   4294   -568   -807    -12       N  
ATOM    683  CA  LYS A  85      17.529  -1.250  20.049  1.00 29.02           C  
ANISOU  683  CA  LYS A  85     3300   3434   4293   -596   -779    -71       C  
ATOM    684  C   LYS A  85      17.446   0.264  20.233  1.00 28.84           C  
ANISOU  684  C   LYS A  85     3397   3461   4099   -673   -681    -70       C  
ATOM    685  O   LYS A  85      18.428   0.896  20.613  1.00 26.82           O  
ANISOU  685  O   LYS A  85     3177   3270   3743   -747   -688    -61       O  
ATOM    686  CB  LYS A  85      18.162  -1.572  18.696  1.00 28.29           C  
ANISOU  686  CB  LYS A  85     3119   3398   4231   -500   -814   -197       C  
ATOM    687  CG  LYS A  85      18.469  -3.045  18.499  1.00 31.42           C  
ANISOU  687  CG  LYS A  85     3399   3730   4809   -399   -961   -259       C  
ATOM    688  CD  LYS A  85      19.540  -3.540  19.474  1.00 35.25           C  
ANISOU  688  CD  LYS A  85     3846   4237   5310   -445  -1032   -194       C  
ATOM    689  CE  LYS A  85      20.935  -3.098  19.066  1.00 39.45           C  
ANISOU  689  CE  LYS A  85     4328   4959   5703   -442  -1012   -252       C  
ATOM    690  NZ  LYS A  85      21.993  -3.813  19.853  1.00 41.26           N1+
ANISOU  690  NZ  LYS A  85     4491   5207   5979   -456  -1106   -208       N1+
ATOM    691  N   GLY A  86      16.281   0.841  19.960  1.00 26.59           N  
ANISOU  691  N   GLY A  86     3171   3129   3803   -658   -614    -77       N  
ATOM    692  CA  GLY A  86      16.102   2.278  20.095  1.00 27.40           C  
ANISOU  692  CA  GLY A  86     3392   3234   3785   -715   -558    -96       C  
ATOM    693  C   GLY A  86      14.852   2.798  19.407  1.00 24.62           C  
ANISOU  693  C   GLY A  86     3075   2830   3450   -668   -491   -117       C  
ATOM    694  O   GLY A  86      13.932   2.033  19.094  1.00 24.95           O  
ANISOU  694  O   GLY A  86     3059   2836   3586   -606   -480    -99       O  
ATOM    695  N   GLU A  87      14.806   4.105  19.168  1.00 21.58           N  
ANISOU  695  N   GLU A  87     2779   2424   2995   -705   -468   -142       N  
ATOM    696  CA  GLU A  87      13.665   4.682  18.464  1.00 28.62           C  
ANISOU  696  CA  GLU A  87     3700   3266   3908   -662   -410   -155       C  
ATOM    697  C   GLU A  87      14.109   5.725  17.461  1.00 30.74           C  
ANISOU  697  C   GLU A  87     3972   3550   4157   -705   -425   -146       C  
ATOM    698  O   GLU A  87      15.166   6.335  17.616  1.00 31.62           O  
ANISOU  698  O   GLU A  87     4104   3678   4232   -792   -492   -122       O  
ATOM    699  CB  GLU A  87      12.709   5.351  19.439  1.00 34.37           C  
ANISOU  699  CB  GLU A  87     4549   3921   4590   -651   -380   -183       C  
ATOM    700  CG  GLU A  87      12.983   6.828  19.584  1.00 42.37           C  
ANISOU  700  CG  GLU A  87     5691   4859   5549   -690   -428   -240       C  
ATOM    701  CD  GLU A  87      11.908   7.538  20.361  1.00 50.07           C  
ANISOU  701  CD  GLU A  87     6782   5791   6450   -582   -392   -298       C  
ATOM    702  OE1 GLU A  87      11.199   6.866  21.148  1.00 52.38           O  
ANISOU  702  OE1 GLU A  87     7046   6174   6682   -491   -325   -269       O  
ATOM    703  OE2 GLU A  87      11.774   8.766  20.177  1.00 51.86           O1-
ANISOU  703  OE2 GLU A  87     7112   5906   6685   -581   -446   -360       O1-
ATOM    704  N   ALA A  88      13.289   5.920  16.432  1.00 27.05           N  
ANISOU  704  N   ALA A  88     3470   3081   3727   -664   -379   -141       N  
ATOM    705  CA  ALA A  88      13.454   7.020  15.489  1.00 24.78           C  
ANISOU  705  CA  ALA A  88     3174   2803   3438   -726   -402    -99       C  
ATOM    706  C   ALA A  88      12.119   7.739  15.350  1.00 22.98           C  
ANISOU  706  C   ALA A  88     3021   2468   3243   -686   -357   -108       C  
ATOM    707  O   ALA A  88      11.069   7.105  15.273  1.00 18.69           O  
ANISOU  707  O   ALA A  88     2458   1917   2726   -601   -287   -130       O  
ATOM    708  CB  ALA A  88      13.930   6.513  14.129  1.00 20.94           C  
ANISOU  708  CB  ALA A  88     2523   2481   2953   -725   -400    -78       C  
ATOM    709  N   SER A  89      12.161   9.065  15.341  1.00 22.93           N  
ANISOU  709  N   SER A  89     3095   2363   3255   -751   -420    -82       N  
ATOM    710  CA  SER A  89      10.956   9.856  15.176  1.00 26.18           C  
ANISOU  710  CA  SER A  89     3579   2657   3710   -705   -395    -97       C  
ATOM    711  C   SER A  89      11.127  10.841  14.042  1.00 25.91           C  
ANISOU  711  C   SER A  89     3492   2611   3740   -795   -459      8       C  
ATOM    712  O   SER A  89      12.223  11.366  13.797  1.00 25.00           O  
ANISOU  712  O   SER A  89     3337   2520   3644   -921   -569     97       O  
ATOM    713  CB  SER A  89      10.607  10.610  16.458  1.00 31.72           C  
ANISOU  713  CB  SER A  89     4461   3191   4402   -668   -444   -200       C  
ATOM    714  OG  SER A  89      10.456   9.711  17.540  1.00 37.89           O  
ANISOU  714  OG  SER A  89     5269   4019   5109   -602   -388   -269       O  
ATOM    715  N   ASP A  90      10.030  11.087  13.348  1.00 21.68           N  
ANISOU  715  N   ASP A  90     2939   2052   3248   -745   -401     27       N  
ATOM    716  CA  ASP A  90      10.015  12.064  12.287  1.00 22.56           C  
ANISOU  716  CA  ASP A  90     2990   2148   3434   -834   -465    154       C  
ATOM    717  C   ASP A  90       8.738  12.860  12.467  1.00 19.40           C  
ANISOU  717  C   ASP A  90     2701   1564   3104   -757   -455    114       C  
ATOM    718  O   ASP A  90       7.682  12.296  12.751  1.00 17.68           O  
ANISOU  718  O   ASP A  90     2514   1349   2854   -632   -338     35       O  
ATOM    719  CB  ASP A  90      10.033  11.356  10.931  1.00 20.86           C  
ANISOU  719  CB  ASP A  90     2582   2164   3181   -846   -393    230       C  
ATOM    720  CG  ASP A  90      10.052  12.321   9.766  1.00 24.72           C  
ANISOU  720  CG  ASP A  90     2961   2705   3727   -954   -453    409       C  
ATOM    721  OD1 ASP A  90      10.593  13.440   9.921  1.00 23.92           O  
ANISOU  721  OD1 ASP A  90     2891   2485   3710  -1075   -594    522       O  
ATOM    722  OD2 ASP A  90       9.512  11.959   8.696  1.00 23.53           O1-
ANISOU  722  OD2 ASP A  90     2681   2712   3547   -921   -378    448       O1-
ATOM    723  N   TYR A  91       8.834  14.172  12.331  1.00 19.04           N  
ANISOU  723  N   TYR A  91     2710   1350   3173   -832   -597    181       N  
ATOM    724  CA  TYR A  91       7.638  15.002  12.376  1.00 23.01           C  
ANISOU  724  CA  TYR A  91     3312   1666   3764   -744   -608    142       C  
ATOM    725  C   TYR A  91       7.587  15.930  11.168  1.00 23.08           C  
ANISOU  725  C   TYR A  91     3222   1642   3905   -861   -702    337       C  
ATOM    726  O   TYR A  91       8.610  16.236  10.555  1.00 22.65           O  
ANISOU  726  O   TYR A  91     3051   1663   3892  -1030   -811    511       O  
ATOM    727  CB  TYR A  91       7.566  15.800  13.680  1.00 26.22           C  
ANISOU  727  CB  TYR A  91     3932   1819   4211   -663   -733    -26       C  
ATOM    728  CG  TYR A  91       8.506  16.985  13.738  1.00 29.21           C  
ANISOU  728  CG  TYR A  91     4363   1997   4737   -802   -994     35       C  
ATOM    729  N   ALA A  92       6.385  16.359  10.816  1.00 23.34           N  
ANISOU  729  N   ALA A  92     3280   1586   4002   -776   -659    338       N  
ATOM    730  CA  ALA A  92       6.218  17.314   9.735  1.00 19.98           C  
ANISOU  730  CA  ALA A  92     2761   1109   3721   -883   -761    540       C  
ATOM    731  C   ALA A  92       4.954  18.102  10.020  1.00 21.84           C  
ANISOU  731  C   ALA A  92     3130   1103   4065   -743   -783    455       C  
ATOM    732  O   ALA A  92       4.144  17.698  10.856  1.00 20.20           O  
ANISOU  732  O   ALA A  92     3041    862   3773   -555   -668    262       O  
ATOM    733  CB  ALA A  92       6.125  16.594   8.394  1.00 18.07           C  
ANISOU  733  CB  ALA A  92     2296   1177   3391   -936   -627    694       C  
ATOM    734  N   THR A  93       4.795  19.224   9.330  1.00 20.64           N  
ANISOU  734  N   THR A  93     2943    799   4101   -829   -938    619       N  
ATOM    735  CA  THR A  93       3.705  20.147   9.596  1.00 25.00           C  
ANISOU  735  CA  THR A  93     3628   1078   4792   -687  -1011    537       C  
ATOM    736  C   THR A  93       2.730  20.152   8.432  1.00 26.75           C  
ANISOU  736  C   THR A  93     3709   1416   5039   -687   -899    701       C  
ATOM    737  O   THR A  93       3.142  20.155   7.271  1.00 28.73           O  
ANISOU  737  O   THR A  93     3760   1845   5309   -864   -911    952       O  
ATOM    738  CB  THR A  93       4.257  21.579   9.816  1.00 28.68           C  
ANISOU  738  CB  THR A  93     4185   1191   5519   -778  -1350    587       C  
ATOM    739  CG2 THR A  93       3.136  22.568  10.045  1.00 33.75           C  
ANISOU  739  CG2 THR A  93     4958   1546   6321   -595  -1459    476       C  
ATOM    740  OG1 THR A  93       5.110  21.574  10.965  1.00 32.91           O  
ANISOU  740  OG1 THR A  93     4866   1614   6024   -761  -1468    405       O  
ATOM    741  N   LEU A  94       1.439  20.125   8.739  1.00 25.75           N  
ANISOU  741  N   LEU A  94     3660   1241   4882   -477   -786    567       N  
ATOM    742  CA  LEU A  94       0.419  20.278   7.714  1.00 25.05           C  
ANISOU  742  CA  LEU A  94     3457   1221   4840   -465   -704    717       C  
ATOM    743  C   LEU A  94      -0.181  21.659   7.844  1.00 29.50           C  
ANISOU  743  C   LEU A  94     4122   1457   5629   -382   -898    711       C  
ATOM    744  O   LEU A  94      -0.641  22.044   8.921  1.00 30.01           O  
ANISOU  744  O   LEU A  94     4367   1332   5701   -165   -948    469       O  
ATOM    745  CB  LEU A  94      -0.689  19.230   7.859  1.00 23.80           C  
ANISOU  745  CB  LEU A  94     3281   1259   4502   -294   -448    613       C  
ATOM    746  CG  LEU A  94      -1.753  19.222   6.754  1.00 25.83           C  
ANISOU  746  CG  LEU A  94     3405   1625   4786   -291   -349    771       C  
ATOM    747  CD1 LEU A  94      -1.136  18.827   5.427  1.00 25.65           C  
ANISOU  747  CD1 LEU A  94     3171   1843   4732   -499   -333    987       C  
ATOM    748  CD2 LEU A  94      -2.898  18.282   7.101  1.00 26.18           C  
ANISOU  748  CD2 LEU A  94     3449   1815   4684   -116   -138    670       C  
ATOM    749  N   ASP A  95      -0.165  22.401   6.742  1.00 31.31           N  
ANISOU  749  N   ASP A  95     4222   1638   6038   -542  -1020    978       N  
ATOM    750  CA  ASP A  95      -0.769  23.718   6.689  1.00 33.47           C  
ANISOU  750  CA  ASP A  95     4565   1580   6571   -480  -1232   1013       C  
ATOM    751  C   ASP A  95      -1.999  23.678   5.787  1.00 32.01           C  
ANISOU  751  C   ASP A  95     4261   1518   6383   -423  -1084   1144       C  
ATOM    752  O   ASP A  95      -1.875  23.664   4.563  1.00 32.46           O  
ANISOU  752  O   ASP A  95     4113   1753   6469   -615  -1068   1437       O  
ATOM    753  CB  ASP A  95       0.247  24.746   6.172  1.00 33.99           C  
ANISOU  753  CB  ASP A  95     4560   1450   6905   -737  -1551   1274       C  
ATOM    754  CG  ASP A  95      -0.302  26.152   6.165  1.00 43.46           C  
ANISOU  754  CG  ASP A  95     5841   2239   8434   -681  -1837   1309       C  
ATOM    755  OD1 ASP A  95      -1.263  26.406   6.922  1.00 46.61           O  
ANISOU  755  OD1 ASP A  95     6414   2458   8836   -391  -1822   1026       O  
ATOM    756  OD2 ASP A  95       0.229  27.008   5.409  1.00 46.33           O1-
ANISOU  756  OD2 ASP A  95     6080   2469   9057   -918  -2093   1632       O1-
ATOM    757  N   VAL A  96      -3.182  23.643   6.396  1.00 32.72           N  
ANISOU  757  N   VAL A  96     4462   1552   6416   -151   -974    935       N  
ATOM    758  CA  VAL A  96      -4.438  23.632   5.649  1.00 32.23           C  
ANISOU  758  CA  VAL A  96     4299   1593   6355    -75   -839   1048       C  
ATOM    759  C   VAL A  96      -4.826  25.062   5.253  1.00 34.86           C  
ANISOU  759  C   VAL A  96     4645   1603   6997    -70  -1090   1170       C  
ATOM    760  O   VAL A  96      -5.072  25.900   6.117  1.00 37.56           O  
ANISOU  760  O   VAL A  96     5166   1629   7478    127  -1268    961       O  
ATOM    761  CB  VAL A  96      -5.588  22.997   6.469  1.00 29.30           C  
ANISOU  761  CB  VAL A  96     4009   1334   5790    216   -618    816       C  
ATOM    762  CG1 VAL A  96      -6.839  22.856   5.611  1.00 30.59           C  
ANISOU  762  CG1 VAL A  96     4038   1641   5942    261   -469    969       C  
ATOM    763  CG2 VAL A  96      -5.171  21.636   7.038  1.00 24.52           C  
ANISOU  763  CG2 VAL A  96     3403    990   4925    213   -425    699       C  
ATOM    764  N   THR A  97      -4.882  25.328   3.949  1.00 36.59           N  
ANISOU  764  N   THR A  97     4667   1912   7324   -273  -1118   1502       N  
ATOM    765  CA  THR A  97      -5.105  26.680   3.428  1.00 44.48           C  
ANISOU  765  CA  THR A  97     5637   2608   8658   -331  -1392   1699       C  
ATOM    766  C   THR A  97      -6.464  26.846   2.753  1.00 51.16           C  
ANISOU  766  C   THR A  97     6392   3514   9531   -223  -1279   1804       C  
ATOM    767  O   THR A  97      -7.253  25.907   2.671  1.00 45.43           O  
ANISOU  767  O   THR A  97     5624   3073   8564   -112   -989   1732       O  
ATOM    768  CB  THR A  97      -4.052  27.039   2.366  1.00 44.30           C  
ANISOU  768  CB  THR A  97     5405   2658   8771   -685  -1561   2095       C  
ATOM    769  CG2 THR A  97      -2.644  26.876   2.921  1.00 41.70           C  
ANISOU  769  CG2 THR A  97     5126   2301   8416   -823  -1679   2047       C  
ATOM    770  OG1 THR A  97      -4.221  26.183   1.229  1.00 41.88           O  
ANISOU  770  OG1 THR A  97     4861   2806   8248   -812  -1316   2312       O  
ATOM    771  N   GLY A  98      -6.725  28.051   2.254  1.00 31.39           N  
ATOM    772  CA  GLY A  98      -7.897  28.289   1.436  1.00 33.72           C  
ATOM    773  C   GLY A  98      -7.753  27.567   0.106  1.00 39.73           C  
ATOM    774  O   GLY A  98      -6.636  27.353  -0.376  1.00 36.19           O  
ATOM    775  N   GLY A  99      -8.883  27.190  -0.488  1.00 45.81           N  
ATOM    776  CA  GLY A  99      -8.888  26.429  -1.728  1.00 45.82           C  
ATOM    777  C   GLY A  99      -8.030  27.043  -2.817  1.00 44.26           C  
ATOM    778  O   GLY A  99      -7.995  26.544  -3.942  1.00 44.41           O  
HETATM  779  O1  SO4 A 102      11.134 -10.035  10.807  1.00 38.99           O  
HETATM  780  O2  SO4 A 102       9.672  -8.969  12.346  1.00 37.59           O  
HETATM  781  O3  SO4 A 102      11.349 -10.480  13.135  1.00 40.76           O1-
HETATM  782  O4  SO4 A 102      11.998  -8.356  12.253  1.00 39.91           O  
HETATM  783  S   SO4 A 102      11.039  -9.454  12.144  1.00 39.73           S  
HETATM  784  O1  SO4 A 103      -7.512  10.605  -4.282  1.00 48.81           O  
HETATM  785  O2  SO4 A 103      -9.052  12.244  -3.485  1.00 46.62           O  
HETATM  786  O3  SO4 A 103      -7.691  11.023  -1.951  1.00 44.71           O1-
HETATM  787  O4  SO4 A 103      -6.695  12.653  -3.363  1.00 48.84           O  
HETATM  788  S   SO4 A 103      -7.742  11.637  -3.274  1.00 46.37           S  
HETATM  789  O1  SO4 A 104      14.426  -0.336   0.361  0.71 17.19           O  
HETATM  790  O2  SO4 A 104      12.788  -1.360   1.781  0.71 32.91           O  
HETATM  791  O3  SO4 A 104      15.100  -1.672   2.222  0.71 29.25           O1-
HETATM  792  O4  SO4 A 104      14.079   0.466   2.588  0.71 24.70           O  
HETATM  793  S   SO4 A 104      14.102  -0.720   1.735  0.71 28.88           S  
HETATM  794  O1  SO4 A 105     -11.471  29.089  -1.484  0.84 58.20           O  
HETATM  795  O2  SO4 A 105     -12.987  28.917   0.334  0.84 60.13           O  
HETATM  796  O3  SO4 A 105     -10.825  29.858   0.679  0.84 61.59           O1-
HETATM  797  O4  SO4 A 105     -12.456  31.065  -0.574  0.84 59.71           O  
HETATM  798  S   SO4 A 105     -11.936  29.736  -0.261  0.84 59.20           S  
HETATM  799  O1  SO4 A 106      16.965  10.841  15.560  0.73 55.41           O  
HETATM  800  O2  SO4 A 106      15.115  10.111  14.242  0.73 52.61           O  
HETATM  801  O3  SO4 A 106      15.325   9.419  16.525  0.73 57.32           O1-
HETATM  802  O4  SO4 A 106      14.780  11.682  16.021  0.73 54.02           O  
HETATM  803  S   SO4 A 106      15.543  10.514  15.584  0.73 55.73           S  
HETATM  804  O   HOH A 107       4.496   0.002  -0.355  1.00 26.17           O  
HETATM  805  O   HOH A 108      -0.859   5.173  15.953  1.00 10.96           O  
HETATM  806  O   HOH A 109       3.296  -1.132  14.656  1.00 17.99           O  
HETATM  807  O   HOH A 110      -9.032   4.088   7.964  1.00 28.46           O  
HETATM  808  O   HOH A 111      -0.628  19.257  -1.302  1.00 37.11           O  
HETATM  809  O   HOH A 112     -11.579  24.613   8.073  1.00 32.21           O  
HETATM  810  O   HOH A 113       6.668   3.584  18.476  1.00 20.02           O  
HETATM  811  O   HOH A 114     -13.119   6.769   5.180  1.00 21.68           O  
HETATM  812  O   HOH A 115       9.910  -4.675  17.284  1.00 18.98           O  
HETATM  813  O   HOH A 116     -12.259   3.248   8.576  1.00 31.81           O  
HETATM  814  O   HOH A 117       2.144   3.380   9.516  1.00 14.83           O  
HETATM  815  O   HOH A 118     -12.631  13.623   1.711  1.00 18.17           O  
HETATM  816  O   HOH A 119       5.575  13.089   3.049  1.00 21.50           O  
HETATM  817  O   HOH A 120       7.931  -0.769  10.940  1.00 31.31           O  
HETATM  818  O   HOH A 121      -7.823  15.365  -2.414  1.00 26.36           O  
HETATM  819  O   HOH A 122       4.332  -4.567  11.579  1.00 30.45           O  
HETATM  820  O   HOH A 123      -9.648  16.947  -5.961  1.00 36.99           O  
HETATM  821  O   HOH A 124      10.274  15.314   8.070  1.00 28.83           O  
HETATM  822  O   HOH A 125       7.931  12.091   2.347  1.00 18.36           O  
HETATM  823  O   HOH A 126      11.307  -0.248   3.739  1.00 25.32           O  
HETATM  824  O   HOH A 127      -4.956  19.648  17.478  1.00 29.96           O  
HETATM  825  O   HOH A 128      -6.183  15.255  11.618  1.00 22.59           O  
HETATM  826  O   HOH A 129       6.167  -1.462   0.585  1.00 23.09           O  
HETATM  827  O   HOH A 130       5.521   6.257  20.456  1.00 27.02           O  
HETATM  828  O   HOH A 131      20.509  -9.421  13.441  1.00 37.27           O  
HETATM  829  O   HOH A 132      10.395  -1.343  10.726  1.00 22.73           O  
HETATM  830  O   HOH A 133      -2.103  17.155  -0.403  1.00 23.06           O  
HETATM  831  O   HOH A 134       2.849  12.580  22.589  1.00 33.74           O  
HETATM  832  O   HOH A 135      17.384   5.351  20.213  1.00 33.61           O  
HETATM  833  O   HOH A 136      14.560  12.226   3.830  1.00 31.13           O  
HETATM  834  O   HOH A 137     -16.519  18.471   5.393  1.00 33.78           O  
HETATM  835  O   HOH A 138       5.164  -2.225  12.748  1.00 31.29           O  
HETATM  836  O   HOH A 139       4.626  -5.262   6.434  1.00 27.10           O  
HETATM  837  O   HOH A 140      -4.916   8.336  21.199  1.00 26.47           O  
HETATM  838  O   HOH A 141       1.216   1.192  11.184  1.00 24.53           O  
HETATM  839  O   HOH A 142      20.116   2.424   4.571  1.00 35.63           O  
HETATM  840  O   HOH A 143      -4.645  -0.049   3.551  1.00 38.97           O  
HETATM  841  O   HOH A 144      -8.881   8.102   0.224  1.00 37.79           O  
HETATM  842  O   HOH A 145       4.153  -0.716  20.043  1.00 44.35           O  
HETATM  843  O   HOH A 146       2.434  15.103  17.186  1.00 24.05           O  
HETATM  844  O   HOH A 147       1.084   0.592  13.805  1.00 25.82           O  
HETATM  845  O   HOH A 148       5.551   1.929  20.068  1.00 33.84           O  
HETATM  846  O   HOH A 149      13.413   1.116  22.442  1.00 29.62           O  
HETATM  847  O   HOH A 150      -0.909  -0.379  10.265  1.00 40.21           O  
HETATM  848  O   HOH A 151       7.281  -2.223   8.878  1.00 31.41           O  
HETATM  849  O   HOH A 152       3.182  -1.051  22.857  1.00 37.75           O  
HETATM  850  O   HOH A 153       2.561   2.122   3.274  1.00 28.67           O  
HETATM  851  O   HOH A 154      23.109  -7.361  18.833  1.00 42.77           O  
HETATM  852  O   HOH A 155       2.200   6.833  22.986  1.00 38.28           O  
HETATM  853  O   HOH A 156     -14.584   6.097  11.778  1.00 38.81           O  
HETATM  854  O   HOH A 157      18.343   1.850   1.282  1.00 25.20           O  
HETATM  855  O   HOH A 158       2.188  10.672  24.544  1.00 42.55           O  
HETATM  856  O   HOH A 159      -0.394   0.648  22.394  1.00 42.06           O  
HETATM  857  O   HOH A 160     -10.356  16.764  12.846  1.00 40.52           O  
HETATM  858  O   HOH A 161       2.397   1.051   0.836  1.00 33.00           O  
HETATM  859  O   HOH A 165       9.816  18.965   5.666  1.00 30.74           O  
HETATM  860  O   HOH A 169      -7.339  13.796  13.639  1.00 31.37           O  
HETATM  861  O   HOH A 170      -6.531  28.660  -4.819  1.00 32.24           O  
HETATM  862  O   HOH A 173      17.597 -12.531  13.872  1.00 47.76           O  
HETATM  863  O   HOH A 178      17.625  -3.157   8.012  1.00 34.55           O  
HETATM  864  O   HOH A 181      15.433   5.421   0.842  1.00 35.45           O  
HETATM  865  O   HOH A 182       6.306  -2.934  23.429  1.00 33.10           O  
HETATM  866  O   HOH A 186       3.641  13.991   1.340  1.00 32.31           O  
HETATM  867  O   HOH A 189      -0.681  27.856  -1.626  1.00 42.47           O  
HETATM  868  O   HOH A 192       3.290  23.275   6.624  1.00 34.43           O  
HETATM  869  O   HOH A 202      -8.135  11.708  14.738  1.00 38.54           O  
HETATM  870  O   HOH A 210      16.235  12.966  14.171  1.00 32.57           O  
HETATM  871  O   HOH A 212       6.688   0.377  23.097  1.00 48.84           O  
HETATM  872  O   HOH A 213     -10.634   6.173   5.606  1.00 32.13           O  
HETATM  873  O   HOH A 216      -6.070   2.029  15.003  1.00 30.76           O  
HETATM  874  O   HOH A 217     -15.018  29.727  -1.174  1.00 51.47           O  
HETATM  875  O   HOH A 226      16.494   7.664  11.499  1.00 30.60           O  
HETATM  876  O   HOH A 227       4.814  24.769   5.220  1.00 46.80           O  
HETATM  877  O   HOH A 233     -10.734  21.904  -2.009  1.00 41.84           O  
HETATM  878  O   HOH A 237       7.623  -4.827   7.711  1.00 44.71           O  
HETATM  879  O   HOH A 241       3.918  15.007  23.104  1.00 34.10           O  
HETATM  880  O   HOH A 243      -4.154   3.591  17.650  1.00 37.55           O  
HETATM  881  O   HOH A 246       2.321  15.405  -0.085  1.00 28.25           O  
HETATM  882  O   HOH A 251      11.783  -1.791   8.390  1.00 19.96           O  
HETATM  883  O   HOH A 252      -0.902  -1.672   6.696  1.00 33.66           O  
HETATM  884  O   HOH A 254       4.498  13.327  20.111  1.00 36.80           O  
HETATM  885  O   HOH A 255      13.059  15.777  10.337  1.00 46.31           O  
HETATM  886  O   HOH A 256      12.912  -2.497   6.161  1.00 40.39           O  
HETATM  887  O   HOH A 257      -9.127  17.281  15.603  1.00 46.53           O  
HETATM  888  O   HOH A 260      -2.681   6.025   3.822  1.00 24.06           O  
HETATM  889  O   HOH A 272     -16.014  31.431  -3.047  1.00 33.39           O  
HETATM  890  O   HOH A 276       0.081  30.087   4.622  1.00 53.16           O  
HETATM  891  O   HOH A 282      -6.059  24.756  -5.735  1.00 46.09           O  
HETATM  892  O   HOH A 283      -3.775   6.954   0.898  1.00 46.63           O  
HETATM  893  O   HOH A 291      14.234  10.391  18.405  1.00 42.10           O  
HETATM  894  O   HOH A 293      -1.559   0.619  14.951  1.00 36.76           O  
HETATM  895  O   HOH A 296      -9.314  14.104  -6.296  1.00 44.82           O  
HETATM  896  O   HOH A 305      -6.648  15.083  16.190  1.00 35.49           O  
HETATM  897  O   HOH A 306      -7.880   9.213  15.139  1.00 37.99           O  
HETATM  898  O   HOH A 307     -10.708   8.541  15.832  1.00 37.34           O  
ATOM    899  N   GLY B  -1      -1.784   2.146  34.238  1.00 69.62           N  
ATOM    900  CA  GLY B  -1      -1.550   2.832  35.495  1.00 67.85           C  
ATOM    901  C   GLY B  -1      -2.680   3.775  35.856  1.00 66.63           C  
ATOM    902  O   GLY B  -1      -3.786   3.332  36.169  1.00 66.32           O  
ATOM    903  N   PRO B   0      -2.410   5.089  35.810  1.00 66.26           N  
ATOM    904  CA  PRO B   0      -3.407   6.106  36.164  1.00 63.41           C  
ATOM    905  C   PRO B   0      -4.466   6.283  35.075  1.00 58.54           C  
ATOM    906  O   PRO B   0      -5.600   6.653  35.377  1.00 59.24           O  
ATOM    907  CB  PRO B   0      -2.566   7.378  36.300  1.00 64.02           C  
ATOM    908  CG  PRO B   0      -1.432   7.171  35.358  1.00 64.88           C  
ATOM    909  CD  PRO B   0      -1.128   5.691  35.398  1.00 66.06           C  
ATOM    910  N   PHE B   1      -4.097   6.019  33.825  1.00 52.21           N  
ATOM    911  CA  PHE B   1      -5.018   6.191  32.703  1.00 48.16           C  
ATOM    912  C   PHE B   1      -5.430   4.843  32.116  1.00 42.31           C  
ATOM    913  O   PHE B   1      -5.752   4.739  30.927  1.00 41.26           O  
ATOM    914  CB  PHE B   1      -4.382   7.074  31.629  1.00 45.05           C  
ATOM    915  CG  PHE B   1      -3.806   8.350  32.167  1.00 42.40           C  
ATOM    916  CD1 PHE B   1      -4.474   9.065  33.148  1.00 41.62           C  
ATOM    917  CD2 PHE B   1      -2.588   8.824  31.711  1.00 41.75           C  
ATOM    918  CE1 PHE B   1      -3.941  10.239  33.653  1.00 42.51           C  
ATOM    919  CE2 PHE B   1      -2.050   9.995  32.212  1.00 41.95           C  
ATOM    920  CZ  PHE B   1      -2.725  10.703  33.185  1.00 42.00           C  
ATOM    921  N   THR B   2      -5.414   3.819  32.966  1.00 59.41           N  
ANISOU  921  N   THR B   2     7649   6069   8856    -44  -2641    588       N  
ATOM    922  CA  THR B   2      -5.760   2.464  32.563  1.00 54.26           C  
ANISOU  922  CA  THR B   2     6965   5330   8323     -3  -2634    629       C  
ATOM    923  C   THR B   2      -7.247   2.343  32.241  1.00 48.08           C  
ANISOU  923  C   THR B   2     6300   4628   7342    -37  -2426    633       C  
ATOM    924  O   THR B   2      -7.624   1.704  31.259  1.00 45.25           O  
ANISOU  924  O   THR B   2     5855   4248   7090      8  -2295    582       O  
ATOM    925  CB  THR B   2      -5.371   1.431  33.652  1.00 60.21           C  
ANISOU  925  CB  THR B   2     7795   5960   9122    -17  -2904    779       C  
ATOM    926  N   LEU B   3      -8.085   2.962  33.066  1.00 45.49           N  
ANISOU  926  N   LEU B   3     6162   4389   6733   -119  -2394    685       N  
ATOM    927  CA  LEU B   3      -9.535   2.916  32.871  1.00 43.51           C  
ANISOU  927  CA  LEU B   3     6024   4214   6294   -157  -2202    689       C  
ATOM    928  C   LEU B   3     -10.015   3.752  31.678  1.00 40.04           C  
ANISOU  928  C   LEU B   3     5494   3873   5848   -130  -1960    557       C  
ATOM    929  O   LEU B   3     -11.115   3.526  31.168  1.00 43.73           O  
ANISOU  929  O   LEU B   3     5994   4382   6240   -137  -1798    542       O  
ATOM    930  CB  LEU B   3     -10.266   3.352  34.146  1.00 43.85           C  
ANISOU  930  CB  LEU B   3     6295   4318   6050   -260  -2231    773       C  
ATOM    931  N   ASP B   4      -9.206   4.713  31.231  1.00 32.82           N  
ANISOU  931  N   ASP B   4     4467   2990   5013   -103  -1940    466       N  
ATOM    932  CA  ASP B   4      -9.594   5.551  30.090  1.00 28.17           C  
ANISOU  932  CA  ASP B   4     3799   2488   4416    -83  -1724    351       C  
ATOM    933  C   ASP B   4     -10.112   4.692  28.940  1.00 29.48           C  
ANISOU  933  C   ASP B   4     3882   2633   4685    -39  -1595    311       C  
ATOM    934  O   ASP B   4      -9.553   3.634  28.650  1.00 31.80           O  
ANISOU  934  O   ASP B   4     4085   2829   5169      6  -1670    318       O  
ATOM    935  CB  ASP B   4      -8.431   6.413  29.604  1.00 21.76           C  
ANISOU  935  CB  ASP B   4     2845   1680   3741    -51  -1733    259       C  
ATOM    936  CG  ASP B   4      -8.095   7.540  30.569  1.00 23.46           C  
ANISOU  936  CG  ASP B   4     3143   1943   3828   -103  -1812    272       C  
ATOM    937  OD1 ASP B   4      -8.732   7.609  31.642  1.00 23.45           O  
ANISOU  937  OD1 ASP B   4     3313   1969   3628   -166  -1864    352       O  
ATOM    938  OD2 ASP B   4      -7.192   8.348  30.257  1.00 22.90           O1-
ANISOU  938  OD2 ASP B   4     2967   1880   3854    -86  -1817    197       O1-
ATOM    939  N   HIS B   5     -11.180   5.146  28.292  1.00 27.13           N  
ANISOU  939  N   HIS B   5     3616   2423   4269    -54  -1405    267       N  
ATOM    940  CA  HIS B   5     -11.751   4.416  27.159  1.00 28.18           C  
ANISOU  940  CA  HIS B   5     3681   2549   4479    -22  -1277    222       C  
ATOM    941  C   HIS B   5     -12.482   5.333  26.180  1.00 24.94           C  
ANISOU  941  C   HIS B   5     3252   2241   3983    -28  -1081    141       C  
ATOM    942  O   HIS B   5     -12.972   6.401  26.554  1.00 17.32           O  
ANISOU  942  O   HIS B   5     2366   1354   2862    -65  -1030    143       O  
ATOM    943  CB  HIS B   5     -12.685   3.292  27.636  1.00 32.62           C  
ANISOU  943  CB  HIS B   5     4344   3073   4977    -44  -1298    309       C  
ATOM    944  CG  HIS B   5     -13.955   3.777  28.272  1.00 37.18           C  
ANISOU  944  CG  HIS B   5     5077   3729   5319   -108  -1222    356       C  
ATOM    945  CD2 HIS B   5     -15.168   4.053  27.740  1.00 39.20           C  
ANISOU  945  CD2 HIS B   5     5363   4059   5471   -126  -1057    324       C  
ATOM    946  ND1 HIS B   5     -14.065   4.011  29.626  1.00 39.05           N  
ANISOU  946  ND1 HIS B   5     5459   3971   5408   -166  -1320    440       N  
ATOM    947  CE1 HIS B   5     -15.293   4.422  29.900  1.00 40.53           C  
ANISOU  947  CE1 HIS B   5     5755   4231   5415   -219  -1202    450       C  
ATOM    948  NE2 HIS B   5     -15.984   4.454  28.776  1.00 41.18           N  
ANISOU  948  NE2 HIS B   5     5765   4354   5530   -191  -1046    383       N  
ATOM    949  N   ALA B   6     -12.545   4.904  24.924  1.00 25.03           N  
ANISOU  949  N   ALA B   6     3163   2246   4102      5   -977     69       N  
ATOM    950  CA  ALA B   6     -13.237   5.657  23.885  1.00 22.65           C  
ANISOU  950  CA  ALA B   6     2845   2034   3729     -3   -805      0       C  
ATOM    951  C   ALA B   6     -14.723   5.789  24.233  1.00 18.48           C  
ANISOU  951  C   ALA B   6     2439   1565   3017    -42   -735     50       C  
ATOM    952  O   ALA B   6     -15.262   4.973  24.965  1.00 17.86           O  
ANISOU  952  O   ALA B   6     2439   1452   2895    -60   -788    123       O  
ATOM    953  CB  ALA B   6     -13.051   4.987  22.536  1.00 21.21           C  
ANISOU  953  CB  ALA B   6     2548   1825   3685     27   -719    -81       C  
ATOM    954  N   PRO B   7     -15.387   6.848  23.737  1.00 16.29           N  
ANISOU  954  N   PRO B   7     2178   1374   2637    -59   -616     13       N  
ATOM    955  CA  PRO B   7     -16.804   7.007  24.086  1.00 16.50           C  
ANISOU  955  CA  PRO B   7     2306   1451   2514    -94   -547     53       C  
ATOM    956  C   PRO B   7     -17.629   5.813  23.609  1.00 20.92           C  
ANISOU  956  C   PRO B   7     2862   1986   3100    -91   -507     64       C  
ATOM    957  O   PRO B   7     -17.288   5.161  22.616  1.00 19.60           O  
ANISOU  957  O   PRO B   7     2607   1791   3050    -63   -483     16       O  
ATOM    958  CB  PRO B   7     -17.211   8.287  23.341  1.00 16.65           C  
ANISOU  958  CB  PRO B   7     2304   1549   2473    -99   -432     -2       C  
ATOM    959  CG  PRO B   7     -15.931   9.055  23.190  1.00 14.92           C  
ANISOU  959  CG  PRO B   7     2020   1324   2322    -82   -468    -45       C  
ATOM    960  CD  PRO B   7     -14.869   7.986  22.969  1.00 14.99           C  
ANISOU  960  CD  PRO B   7     1947   1256   2492    -51   -548    -60       C  
ATOM    961  N   ARG B   8     -18.692   5.507  24.338  1.00 18.57           N  
ANISOU  961  N   ARG B   8     2662   1696   2698   -127   -494    123       N  
ATOM    962  CA  ARG B   8     -19.601   4.455  23.931  1.00 20.45           C  
ANISOU  962  CA  ARG B   8     2901   1914   2953   -132   -447    133       C  
ATOM    963  C   ARG B   8     -21.033   4.922  24.168  1.00 21.00           C  
ANISOU  963  C   ARG B   8     3043   2044   2894   -172   -351    148       C  
ATOM    964  O   ARG B   8     -21.346   5.441  25.242  1.00 20.94           O  
ANISOU  964  O   ARG B   8     3126   2053   2777   -209   -360    189       O  
ATOM    965  CB  ARG B   8     -19.315   3.176  24.732  1.00 24.51           C  
ANISOU  965  CB  ARG B   8     3458   2339   3517   -138   -554    204       C  
ATOM    966  N   ILE B   9     -21.893   4.744  23.170  1.00 18.42           N  
ANISOU  966  N   ILE B   9     2670   1746   2581   -167   -260    109       N  
ATOM    967  CA  ILE B   9     -23.306   5.082  23.312  1.00 19.00           C  
ANISOU  967  CA  ILE B   9     2789   1865   2564   -201   -171    118       C  
ATOM    968  C   ILE B   9     -24.032   3.982  24.095  1.00 20.34           C  
ANISOU  968  C   ILE B   9     3029   1989   2709   -238   -180    176       C  
ATOM    969  O   ILE B   9     -24.016   2.822  23.703  1.00 19.71           O  
ANISOU  969  O   ILE B   9     2921   1860   2708   -228   -201    180       O  
ATOM    970  CB  ILE B   9     -23.978   5.260  21.932  1.00 17.17           C  
ANISOU  970  CB  ILE B   9     2482   1677   2363   -186    -88     60       C  
ATOM    971  CG1 ILE B   9     -23.112   6.149  21.028  1.00 17.28           C  
ANISOU  971  CG1 ILE B   9     2430   1725   2411   -156    -84      6       C  
ATOM    972  CG2 ILE B   9     -25.377   5.850  22.086  1.00 17.55           C  
ANISOU  972  CG2 ILE B   9     2558   1771   2337   -215     -5     64       C  
ATOM    973  CD1 ILE B   9     -22.919   7.581  21.557  1.00 13.39           C  
ANISOU  973  CD1 ILE B   9     1967   1271   1849   -160    -75      9       C  
ATOM    974  N   THR B  10     -24.660   4.338  25.210  1.00 18.23           N  
ANISOU  974  N   THR B  10     2857   1734   2335   -286   -158    216       N  
ATOM    975  CA  THR B  10     -25.268   3.328  26.071  1.00 21.25           C  
ANISOU  975  CA  THR B  10     3324   2070   2681   -334   -165    278       C  
ATOM    976  C   THR B  10     -26.797   3.431  26.057  1.00 22.31           C  
ANISOU  976  C   THR B  10     3473   2238   2768   -373    -42    263       C  
ATOM    977  O   THR B  10     -27.498   2.518  26.481  1.00 25.64           O  
ANISOU  977  O   THR B  10     3942   2621   3177   -414    -20    300       O  
ATOM    978  CB  THR B  10     -24.731   3.410  27.511  1.00 26.89           C  
ANISOU  978  CB  THR B  10     4157   2756   3302   -377   -243    345       C  
ATOM    979  CG2 THR B  10     -23.218   3.246  27.522  1.00 30.53           C  
ANISOU  979  CG2 THR B  10     4590   3175   3836   -335   -380    361       C  
ATOM    980  OG1 THR B  10     -25.069   4.679  28.085  1.00 25.36           O  
ANISOU  980  OG1 THR B  10     4014   2622   3000   -409   -183    324       O  
ATOM    981  N   LEU B  11     -27.302   4.563  25.582  1.00 18.63           N  
ANISOU  981  N   LEU B  11     2960   1834   2283   -362     35    209       N  
ATOM    982  CA  LEU B  11     -28.715   4.718  25.295  1.00 20.84           C  
ANISOU  982  CA  LEU B  11     3216   2143   2562   -384    143    181       C  
ATOM    983  C   LEU B  11     -28.793   5.550  24.031  1.00 17.99           C  
ANISOU  983  C   LEU B  11     2751   1831   2254   -335    169    122       C  
ATOM    984  O   LEU B  11     -28.249   6.653  23.982  1.00 15.72           O  
ANISOU  984  O   LEU B  11     2453   1574   1945   -314    161    102       O  
ATOM    985  CB  LEU B  11     -29.429   5.454  26.427  1.00 23.46           C  
ANISOU  985  CB  LEU B  11     3626   2492   2795   -440    218    186       C  
ATOM    986  CG  LEU B  11     -30.888   5.779  26.100  1.00 24.30           C  
ANISOU  986  CG  LEU B  11     3683   2624   2927   -457    336    145       C  
ATOM    987  CD1 LEU B  11     -31.741   4.577  26.397  1.00 28.34           C  
ANISOU  987  CD1 LEU B  11     4223   3097   3450   -505    375    170       C  
ATOM    988  CD2 LEU B  11     -31.382   6.984  26.883  1.00 27.27           C  
ANISOU  988  CD2 LEU B  11     4096   3028   3239   -491    419    117       C  
ATOM    989  N  AARG B  12     -29.467   5.032  23.012  0.56 16.29           N  
ANISOU  989  N  AARG B  12     2465   1620   2104   -323    196     96       N  
ATOM    990  N  BARG B  12     -29.457   5.036  23.005  0.44 16.58           N  
ANISOU  990  N  BARG B  12     2501   1657   2142   -323    196     96       N  
ATOM    991  CA AARG B  12     -29.514   5.719  21.724  0.56 17.80           C  
ANISOU  991  CA AARG B  12     2570   1856   2338   -286    206     49       C  
ATOM    992  CA BARG B  12     -29.488   5.738  21.724  0.44 17.72           C  
ANISOU  992  CA BARG B  12     2559   1845   2327   -285    205     49       C  
ATOM    993  C  AARG B  12     -30.724   6.644  21.585  0.56 17.32           C  
ANISOU  993  C  AARG B  12     2478   1831   2272   -295    279     27       C  
ATOM    994  C  BARG B  12     -30.726   6.619  21.554  0.44 17.27           C  
ANISOU  994  C  BARG B  12     2469   1824   2267   -295    279     26       C  
ATOM    995  O  AARG B  12     -31.739   6.467  22.261  0.56 17.46           O  
ANISOU  995  O  AARG B  12     2518   1837   2281   -332    340     34       O  
ATOM    996  O  BARG B  12     -31.760   6.387  22.182  0.44 17.60           O  
ANISOU  996  O  BARG B  12     2531   1853   2303   -331    338     33       O  
ATOM    997  CB AARG B  12     -29.476   4.705  20.575  0.56 18.81           C  
ANISOU  997  CB AARG B  12     2640   1971   2537   -271    182     26       C  
ATOM    998  CB BARG B  12     -29.358   4.747  20.563  0.44 18.31           C  
ANISOU  998  CB BARG B  12     2576   1907   2472   -268    178     25       C  
ATOM    999  CG AARG B  12     -30.721   3.831  20.455  0.56 21.49           C  
ANISOU  999  CG AARG B  12     2964   2295   2907   -302    225     25       C  
ATOM   1000  CG BARG B  12     -30.549   3.817  20.388  0.44 20.97           C  
ANISOU 1000  CG BARG B  12     2896   2228   2843   -297    217     23       C  
ATOM   1001  CD AARG B  12     -30.531   2.766  19.379  0.56 22.34           C  
ANISOU 1001  CD AARG B  12     3022   2383   3081   -293    197     -5       C  
ATOM   1002  CD BARG B  12     -30.223   2.705  19.402  0.44 21.45           C  
ANISOU 1002  CD BARG B  12     2915   2265   2971   -287    184     -3       C  
ATOM   1003  NE AARG B  12     -31.781   2.116  19.000  0.56 25.80           N  
ANISOU 1003  NE AARG B  12     3428   2817   3556   -321    236    -19       N  
ATOM   1004  NE BARG B  12     -29.252   1.768  19.959  0.44 21.32           N  
ANISOU 1004  NE BARG B  12     2934   2186   2979   -283    131     25       N  
ATOM   1005  CZ AARG B  12     -32.584   2.548  18.030  0.56 29.40           C  
ANISOU 1005  CZ AARG B  12     3824   3317   4030   -321    254    -55       C  
ATOM   1006  CZ BARG B  12     -28.579   0.867  19.251  0.44 21.86           C  
ANISOU 1006  CZ BARG B  12     2967   2219   3121   -266     96     -3       C  
ATOM   1007  NH1AARG B  12     -32.273   3.639  17.342  0.56 29.09           N1+
ANISOU 1007  NH1AARG B  12     3758   3326   3968   -296    239    -73       N1+
ATOM   1008  NH1BARG B  12     -27.722   0.058  19.859  0.44 25.89           N1+
ANISOU 1008  NH1BARG B  12     3505   2660   3672   -258     40     29       N1+
ATOM   1009  NH2AARG B  12     -33.700   1.895  17.745  0.56 30.60           N  
ANISOU 1009  NH2AARG B  12     3942   3460   4224   -350    280    -69       N  
ATOM   1010  NH2BARG B  12     -28.752   0.775  17.938  0.44 18.77           N  
ANISOU 1010  NH2BARG B  12     2512   1857   2764   -260    115    -64       N  
ATOM   1011  N   MET B  13     -30.610   7.635  20.703  1.00 13.96           N  
ANISOU 1011  N   MET B  13     1999   1443   1863   -264    275      0       N  
ATOM   1012  CA  MET B  13     -31.735   8.503  20.388  1.00 15.77           C  
ANISOU 1012  CA  MET B  13     2181   1696   2115   -265    326    -19       C  
ATOM   1013  C   MET B  13     -32.814   7.702  19.662  1.00 17.24           C  
ANISOU 1013  C   MET B  13     2313   1880   2359   -277    339    -30       C  
ATOM   1014  O   MET B  13     -32.520   6.731  18.950  1.00 13.89           O  
ANISOU 1014  O   MET B  13     1874   1449   1954   -275    301    -35       O  
ATOM   1015  CB  MET B  13     -31.307   9.672  19.495  1.00 13.59           C  
ANISOU 1015  CB  MET B  13     1865   1452   1845   -231    302    -33       C  
ATOM   1016  CG  MET B  13     -30.457  10.717  20.178  1.00 11.12           C  
ANISOU 1016  CG  MET B  13     1592   1143   1489   -221    301    -30       C  
ATOM   1017  SD  MET B  13     -30.072  12.083  19.049  1.00 13.29           S  
ANISOU 1017  SD  MET B  13     1819   1448   1781   -188    280    -42       S  
ATOM   1018  CE  MET B  13     -28.735  11.364  18.097  1.00  6.60           C  
ANISOU 1018  CE  MET B  13      968    610    928   -177    220    -50       C  
ATOM   1019  N   ARG B  14     -34.062   8.123  19.841  1.00 18.40           N  
ANISOU 1019  N   ARG B  14     2423   2027   2542   -291    394    -41       N  
ATOM   1020  CA  ARG B  14     -35.183   7.495  19.159  1.00 18.59           C  
ANISOU 1020  CA  ARG B  14     2383   2047   2632   -304    402    -56       C  
ATOM   1021  C   ARG B  14     -35.736   8.424  18.085  1.00 18.81           C  
ANISOU 1021  C   ARG B  14     2335   2103   2710   -279    374    -69       C  
ATOM   1022  O   ARG B  14     -36.091   9.565  18.360  1.00 18.30           O  
ANISOU 1022  O   ARG B  14     2249   2039   2666   -266    401    -72       O  
ATOM   1023  CB  ARG B  14     -36.284   7.146  20.156  1.00 19.19           C  
ANISOU 1023  CB  ARG B  14     2463   2093   2735   -346    485    -61       C  
ATOM   1024  N   SER B  15     -35.826   7.924  16.864  1.00 18.67           N  
ANISOU 1024  N   SER B  15     2279   2103   2713   -277    317    -77       N  
ATOM   1025  CA  SER B  15     -36.420   8.692  15.795  1.00 17.70           C  
ANISOU 1025  CA  SER B  15     2093   2002   2630   -263    272    -80       C  
ATOM   1026  C   SER B  15     -37.887   8.871  16.119  1.00 20.00           C  
ANISOU 1026  C   SER B  15     2314   2270   3012   -273    310    -90       C  
ATOM   1027  O   SER B  15     -38.516   8.010  16.729  1.00 21.03           O  
ANISOU 1027  O   SER B  15     2439   2377   3176   -302    361   -103       O  
ATOM   1028  CB  SER B  15     -36.249   7.980  14.453  1.00 17.90           C  
ANISOU 1028  CB  SER B  15     2106   2052   2642   -274    205    -91       C  
ATOM   1029  OG  SER B  15     -34.878   7.767  14.167  1.00 12.93           O  
ANISOU 1029  OG  SER B  15     1532   1437   1945   -268    187    -94       O  
ATOM   1030  N   HIS B  16     -38.445   9.996  15.719  1.00 19.58           N  
ANISOU 1030  N   HIS B  16     2206   2219   3014   -251    287    -84       N  
ATOM   1031  CA  HIS B  16     -39.844  10.224  16.005  1.00 22.49           C  
ANISOU 1031  CA  HIS B  16     2490   2558   3499   -257    322   -100       C  
ATOM   1032  C   HIS B  16     -40.404  11.338  15.147  1.00 21.01           C  
ANISOU 1032  C   HIS B  16     2229   2368   3385   -228    253    -85       C  
ATOM   1033  O   HIS B  16     -39.669  11.998  14.399  1.00 19.83           O  
ANISOU 1033  O   HIS B  16     2110   2243   3181   -209    184    -56       O  
ATOM   1034  CB  HIS B  16     -40.044  10.511  17.496  1.00 24.09           C  
ANISOU 1034  CB  HIS B  16     2711   2727   3713   -268    439   -120       C  
ATOM   1035  CG  HIS B  16     -39.331  11.736  17.987  1.00 23.43           C  
ANISOU 1035  CG  HIS B  16     2667   2644   3590   -242    459   -113       C  
ATOM   1036  CD2 HIS B  16     -39.738  13.024  18.083  1.00 23.44           C  
ANISOU 1036  CD2 HIS B  16     2618   2624   3664   -217    475   -120       C  
ATOM   1037  ND1 HIS B  16     -38.045  11.703  18.482  1.00 25.24           N  
ANISOU 1037  ND1 HIS B  16     2993   2890   3705   -242    464   -100       N  
ATOM   1038  CE1 HIS B  16     -37.685  12.918  18.850  1.00 24.25           C  
ANISOU 1038  CE1 HIS B  16     2880   2759   3575   -221    483   -101       C  
ATOM   1039  NE2 HIS B  16     -38.692  13.739  18.618  1.00 23.03           N  
ANISOU 1039  NE2 HIS B  16     2638   2580   3531   -205    493   -114       N  
ATOM   1040  N   ARG B  17     -41.716  11.510  15.248  1.00 20.72           N  
ANISOU 1040  N   ARG B  17     2094   2298   3481   -230    268   -103       N  
ATOM   1041  CA  ARG B  17     -42.449  12.495  14.480  1.00 24.32           C  
ANISOU 1041  CA  ARG B  17     2463   2736   4043   -202    190    -84       C  
ATOM   1042  C   ARG B  17     -42.901  13.589  15.419  1.00 25.74           C  
ANISOU 1042  C   ARG B  17     2594   2867   4320   -178    272   -105       C  
ATOM   1043  O   ARG B  17     -43.084  13.358  16.614  1.00 28.47           O  
ANISOU 1043  O   ARG B  17     2950   3191   4677   -198    397   -147       O  
ATOM   1044  CB  ARG B  17     -43.669  11.851  13.818  1.00 29.70           C  
ANISOU 1044  CB  ARG B  17     3047   3405   4831   -221    132    -96       C  
ATOM   1045  CG  ARG B  17     -43.321  10.732  12.841  1.00 37.80           C  
ANISOU 1045  CG  ARG B  17     4118   4477   5767   -253     54    -88       C  
ATOM   1046  CD  ARG B  17     -44.572  10.086  12.286  1.00 48.96           C  
ANISOU 1046  CD  ARG B  17     5434   5877   7293   -277      0   -107       C  
ATOM   1047  NE  ARG B  17     -45.316   9.385  13.328  1.00 57.66           N  
ANISOU 1047  NE  ARG B  17     6487   6941   8478   -300    117   -155       N  
ATOM   1048  CZ  ARG B  17     -45.111   8.114  13.665  1.00 62.94           C  
ANISOU 1048  CZ  ARG B  17     7204   7619   9091   -339    173   -179       C  
ATOM   1049  NH1 ARG B  17     -44.187   7.400  13.035  1.00 64.37           N1+
ANISOU 1049  NH1 ARG B  17     7472   7841   9147   -353    123   -167       N1+
ATOM   1050  NH2 ARG B  17     -45.835   7.555  14.627  1.00 63.78           N  
ANISOU 1050  NH2 ARG B  17     7273   7687   9275   -367    284   -217       N  
ATOM   1051  N   VAL B  18     -43.062  14.785  14.875  1.00 21.75           N  
ANISOU 1051  N   VAL B  18     2041   2340   3883   -141    204    -77       N  
ATOM   1052  CA  VAL B  18     -43.523  15.911  15.651  1.00 21.47           C  
ANISOU 1052  CA  VAL B  18     1947   2247   3964   -115    276   -102       C  
ATOM   1053  C   VAL B  18     -44.391  16.770  14.743  1.00 22.11           C  
ANISOU 1053  C   VAL B  18     1916   2285   4200    -80    165    -71       C  
ATOM   1054  O   VAL B  18     -44.038  17.019  13.591  1.00 21.62           O  
ANISOU 1054  O   VAL B  18     1878   2246   4089    -69     30     -9       O  
ATOM   1055  CB  VAL B  18     -42.335  16.727  16.225  1.00 24.26           C  
ANISOU 1055  CB  VAL B  18     2395   2609   4213   -101    324    -95       C  
ATOM   1056  CG1 VAL B  18     -41.474  17.272  15.106  1.00 25.16           C  
ANISOU 1056  CG1 VAL B  18     2558   2753   4248    -80    202    -31       C  
ATOM   1057  CG2 VAL B  18     -42.828  17.871  17.102  1.00 23.91           C  
ANISOU 1057  CG2 VAL B  18     2292   2501   4292    -80    415   -136       C  
ATOM   1058  N   PRO B  19     -45.554  17.197  15.244  1.00 23.52           N  
ANISOU 1058  N   PRO B  19     1969   2395   4571    -66    220   -114       N  
ATOM   1059  CA  PRO B  19     -46.396  18.074  14.431  1.00 24.99           C  
ANISOU 1059  CA  PRO B  19     2038   2526   4933    -27    102    -81       C  
ATOM   1060  C   PRO B  19     -45.740  19.437  14.280  1.00 24.53           C  
ANISOU 1060  C   PRO B  19     2013   2442   4868     13     65    -39       C  
ATOM   1061  O   PRO B  19     -45.067  19.902  15.193  1.00 22.61           O  
ANISOU 1061  O   PRO B  19     1830   2195   4566     16    179    -71       O  
ATOM   1062  CB  PRO B  19     -47.679  18.205  15.260  1.00 27.18           C  
ANISOU 1062  CB  PRO B  19     2171   2727   5430    -24    208   -158       C  
ATOM   1063  CG  PRO B  19     -47.646  17.050  16.215  1.00 25.15           C  
ANISOU 1063  CG  PRO B  19     1963   2502   5089    -77    356   -220       C  
ATOM   1064  CD  PRO B  19     -46.204  16.809  16.507  1.00 23.69           C  
ANISOU 1064  CD  PRO B  19     1949   2384   4667    -94    386   -196       C  
ATOM   1065  N  ACYS B  20     -45.939  20.065  13.129  0.60 24.89           N  
ANISOU 1065  N  ACYS B  20     2023   2467   4968     40    -99     35       N  
ATOM   1066  N  BCYS B  20     -45.939  20.070  13.126  0.40 24.79           N  
ANISOU 1066  N  BCYS B  20     2010   2454   4956     40   -100     35       N  
ATOM   1067  CA ACYS B  20     -45.400  21.392  12.872  0.60 24.20           C  
ANISOU 1067  CA ACYS B  20     1962   2343   4890     76   -148     86       C  
ATOM   1068  CA BCYS B  20     -45.410  21.409  12.891  0.40 24.14           C  
ANISOU 1068  CA BCYS B  20     1952   2334   4886     76   -146     85       C  
ATOM   1069  C  ACYS B  20     -45.771  22.367  13.993  0.60 23.04           C  
ANISOU 1069  C  ACYS B  20     1739   2113   4904    109    -19     22       C  
ATOM   1070  C  BCYS B  20     -45.765  22.339  14.039  0.40 22.98           C  
ANISOU 1070  C  BCYS B  20     1732   2106   4893    107    -12     19       C  
ATOM   1071  O  ACYS B  20     -46.933  22.450  14.394  0.60 22.56           O  
ANISOU 1071  O  ACYS B  20     1539   1984   5048    123     24    -30       O  
ATOM   1072  O  BCYS B  20     -46.908  22.373  14.494  0.40 22.81           O  
ANISOU 1072  O  BCYS B  20     1576   2020   5071    119     40    -38       O  
ATOM   1073  CB ACYS B  20     -45.925  21.893  11.525  0.60 25.32           C  
ANISOU 1073  CB ACYS B  20     2051   2454   5116     94   -351    176       C  
ATOM   1074  CB BCYS B  20     -45.952  21.992  11.584  0.40 25.34           C  
ANISOU 1074  CB BCYS B  20     2047   2449   5132     98   -346    174       C  
ATOM   1075  SG ACYS B  20     -45.435  23.551  11.079  0.60 34.22           S  
ANISOU 1075  SG ACYS B  20     3201   3519   6283    136   -434    255       S  
ATOM   1076  SG BCYS B  20     -44.972  21.615  10.120  0.40 24.87           S  
ANISOU 1076  SG BCYS B  20     2137   2480   4835     58   -505    272       S  
ATOM   1077  N   GLY B  21     -44.778  23.094  14.504  1.00 21.20           N  
ANISOU 1077  N   GLY B  21     1592   1882   4580    116     50     18       N  
ATOM   1078  CA  GLY B  21     -45.018  24.107  15.513  1.00 22.84           C  
ANISOU 1078  CA  GLY B  21     1742   2010   4925    141    171    -46       C  
ATOM   1079  C   GLY B  21     -44.672  23.663  16.918  1.00 23.94           C  
ANISOU 1079  C   GLY B  21     1940   2178   4978    104    365   -142       C  
ATOM   1080  O   GLY B  21     -44.378  24.497  17.776  1.00 24.64           O  
ANISOU 1080  O   GLY B  21     2043   2228   5092    110    472   -192       O  
ATOM   1081  N   GLN B  22     -44.706  22.356  17.157  1.00 22.52           N  
ANISOU 1081  N   GLN B  22     1800   2062   4694     61    407   -165       N  
ATOM   1082  CA  GLN B  22     -44.370  21.813  18.469  1.00 22.27           C  
ANISOU 1082  CA  GLN B  22     1842   2060   4560     15    577   -241       C  
ATOM   1083  C   GLN B  22     -42.859  21.795  18.683  1.00 19.77           C  
ANISOU 1083  C   GLN B  22     1683   1808   4021     -1    580   -214       C  
ATOM   1084  O   GLN B  22     -42.080  21.790  17.718  1.00 17.12           O  
ANISOU 1084  O   GLN B  22     1405   1514   3586     12    457   -139       O  
ATOM   1085  CB  GLN B  22     -44.928  20.398  18.626  1.00 23.17           C  
ANISOU 1085  CB  GLN B  22     1947   2211   4647    -29    612   -265       C  
ATOM   1086  CG  GLN B  22     -46.457  20.318  18.581  1.00 24.22           C  
ANISOU 1086  CG  GLN B  22     1914   2277   5011    -22    633   -309       C  
ATOM   1087  CD  GLN B  22     -47.100  21.152  19.657  1.00 26.02           C  
ANISOU 1087  CD  GLN B  22     2065   2425   5397    -22    791   -403       C  
ATOM   1088  NE2 GLN B  22     -48.030  22.019  19.265  1.00 26.10           N  
ANISOU 1088  NE2 GLN B  22     1920   2348   5650     25    748   -413       N  
ATOM   1089  OE1 GLN B  22     -46.751  21.039  20.827  1.00 28.11           O  
ANISOU 1089  OE1 GLN B  22     2409   2703   5569    -67    947   -466       O  
ATOM   1090  N   ASN B  23     -42.446  21.798  19.947  1.00 18.11           N  
ANISOU 1090  N   ASN B  23     1543   1604   3733    -36    720   -278       N  
ATOM   1091  CA  ASN B  23     -41.035  21.643  20.275  1.00 19.22           C  
ANISOU 1091  CA  ASN B  23     1828   1805   3670    -57    722   -259       C  
ATOM   1092  C   ASN B  23     -40.756  20.164  20.343  1.00 20.50           C  
ANISOU 1092  C   ASN B  23     2060   2032   3697    -97    717   -245       C  
ATOM   1093  O   ASN B  23     -41.673  19.374  20.526  1.00 20.93           O  
ANISOU 1093  O   ASN B  23     2064   2079   3810   -120    760   -271       O  
ATOM   1094  CB  ASN B  23     -40.704  22.287  21.624  1.00 21.20           C  
ANISOU 1094  CB  ASN B  23     2132   2034   3890    -84    860   -331       C  
ATOM   1095  CG  ASN B  23     -41.028  23.771  21.664  1.00 23.15           C  
ANISOU 1095  CG  ASN B  23     2303   2203   4289    -46    884   -360       C  
ATOM   1096  ND2 ASN B  23     -41.297  24.279  22.866  1.00 22.95           N  
ANISOU 1096  ND2 ASN B  23     2281   2138   4302    -76   1034   -452       N  
ATOM   1097  OD1 ASN B  23     -41.029  24.455  20.633  1.00 16.83           O  
ANISOU 1097  OD1 ASN B  23     1449   1375   3569      4    771   -301       O  
ATOM   1098  N   THR B  24     -39.501  19.774  20.186  1.00 22.16           N  
ANISOU 1098  N   THR B  24     2378   2299   3741   -105    666   -205       N  
ATOM   1099  CA  THR B  24     -39.155  18.367  20.333  1.00 19.37           C  
ANISOU 1099  CA  THR B  24     2092   1996   3270   -141    663   -194       C  
ATOM   1100  C   THR B  24     -37.783  18.190  20.967  1.00 18.64           C  
ANISOU 1100  C   THR B  24     2126   1941   3015   -162    674   -188       C  
ATOM   1101  O   THR B  24     -36.963  19.115  20.991  1.00 18.68           O  
ANISOU 1101  O   THR B  24     2164   1945   2987   -144    656   -182       O  
ATOM   1102  CB  THR B  24     -39.207  17.597  19.001  1.00 18.52           C  
ANISOU 1102  CB  THR B  24     1959   1921   3157   -128    543   -141       C  
ATOM   1103  CG2 THR B  24     -37.933  17.843  18.166  1.00 16.41           C  
ANISOU 1103  CG2 THR B  24     1755   1692   2786   -109    448    -91       C  
ATOM   1104  OG1 THR B  24     -39.325  16.196  19.282  1.00 19.37           O  
ANISOU 1104  OG1 THR B  24     2098   2053   3207   -165    568   -149       O  
ATOM   1105  N   ARG B  25     -37.548  16.995  21.494  1.00 16.07           N  
ANISOU 1105  N   ARG B  25     1866   1642   2599   -201    697   -188       N  
ATOM   1106  CA  ARG B  25     -36.312  16.719  22.205  1.00 18.20           C  
ANISOU 1106  CA  ARG B  25     2250   1938   2728   -224    698   -180       C  
ATOM   1107  C   ARG B  25     -35.776  15.348  21.816  1.00 18.15           C  
ANISOU 1107  C   ARG B  25     2286   1964   2647   -235    633   -143       C  
ATOM   1108  O   ARG B  25     -36.547  14.421  21.555  1.00 17.20           O  
ANISOU 1108  O   ARG B  25     2131   1841   2564   -249    638   -140       O  
ATOM   1109  CB  ARG B  25     -36.539  16.792  23.720  1.00 20.91           C  
ANISOU 1109  CB  ARG B  25     2655   2263   3029   -277    815   -228       C  
ATOM   1110  N   PHE B  26     -34.452  15.248  21.759  1.00 16.09           N  
ANISOU 1110  N   PHE B  26     2092   1728   2295   -228    575   -119       N  
ATOM   1111  CA  PHE B  26     -33.761  13.980  21.591  1.00 17.55           C  
ANISOU 1111  CA  PHE B  26     2322   1931   2415   -238    521    -91       C  
ATOM   1112  C   PHE B  26     -32.886  13.782  22.822  1.00 18.56           C  
ANISOU 1112  C   PHE B  26     2550   2055   2445   -270    536    -89       C  
ATOM   1113  O   PHE B  26     -32.402  14.760  23.418  1.00 18.38           O  
ANISOU 1113  O   PHE B  26     2561   2030   2391   -272    555   -105       O  
ATOM   1114  CB  PHE B  26     -32.874  14.004  20.343  1.00 14.77           C  
ANISOU 1114  CB  PHE B  26     1952   1604   2056   -204    431    -68       C  
ATOM   1115  CG  PHE B  26     -33.624  13.889  19.045  1.00 16.65           C  
ANISOU 1115  CG  PHE B  26     2114   1851   2361   -187    393    -61       C  
ATOM   1116  CD1 PHE B  26     -34.029  12.644  18.566  1.00 17.17           C  
ANISOU 1116  CD1 PHE B  26     2163   1922   2437   -201    373    -57       C  
ATOM   1117  CD2 PHE B  26     -33.903  15.016  18.289  1.00 17.06           C  
ANISOU 1117  CD2 PHE B  26     2116   1903   2464   -161    370    -54       C  
ATOM   1118  CE1 PHE B  26     -34.712  12.530  17.374  1.00 16.76           C  
ANISOU 1118  CE1 PHE B  26     2048   1881   2437   -193    328    -52       C  
ATOM   1119  CE2 PHE B  26     -34.584  14.911  17.090  1.00 19.06           C  
ANISOU 1119  CE2 PHE B  26     2310   2164   2769   -152    317    -39       C  
ATOM   1120  CZ  PHE B  26     -34.989  13.664  16.629  1.00 16.93           C  
ANISOU 1120  CZ  PHE B  26     2026   1906   2500   -170    295    -40       C  
ATOM   1121  N   ILE B  27     -32.673  12.529  23.207  1.00 14.00           N  
ANISOU 1121  N   ILE B  27     2024   1474   1823   -297    520    -67       N  
ATOM   1122  CA  ILE B  27     -31.762  12.253  24.306  1.00 13.94           C  
ANISOU 1122  CA  ILE B  27     2117   1458   1721   -327    504    -51       C  
ATOM   1123  C   ILE B  27     -30.929  11.012  24.051  1.00 12.73           C  
ANISOU 1123  C   ILE B  27     1989   1299   1547   -322    421    -13       C  
ATOM   1124  O   ILE B  27     -31.406  10.030  23.474  1.00 13.09           O  
ANISOU 1124  O   ILE B  27     2002   1338   1636   -321    414     -4       O  
ATOM   1125  CB  ILE B  27     -32.514  12.095  25.643  1.00 20.80           C  
ANISOU 1125  CB  ILE B  27     3055   2308   2540   -392    594    -62       C  
ATOM   1126  CG1 ILE B  27     -31.524  11.950  26.802  1.00 23.61           C  
ANISOU 1126  CG1 ILE B  27     3531   2659   2782   -432    561    -39       C  
ATOM   1127  CG2 ILE B  27     -33.431  10.894  25.597  1.00 22.89           C  
ANISOU 1127  CG2 ILE B  27     3308   2555   2833   -420    627    -49       C  
ATOM   1128  CD1 ILE B  27     -32.196  11.866  28.162  1.00 27.78           C  
ANISOU 1128  CD1 ILE B  27     4151   3172   3234   -512    656    -51       C  
ATOM   1129  N   LEU B  28     -29.671  11.066  24.475  1.00  8.79           N  
ANISOU 1129  N   LEU B  28     1544    797    997   -319    357      4       N  
ATOM   1130  CA  LEU B  28     -28.842   9.869  24.470  1.00 12.45           C  
ANISOU 1130  CA  LEU B  28     2036   1240   1456   -316    277     39       C  
ATOM   1131  C   LEU B  28     -27.935   9.845  25.691  1.00 12.08           C  
ANISOU 1131  C   LEU B  28     2086   1175   1331   -346    228     67       C  
ATOM   1132  O   LEU B  28     -27.845  10.825  26.450  1.00 13.11           O  
ANISOU 1132  O   LEU B  28     2261   1317   1402   -368    254     52       O  
ATOM   1133  CB  LEU B  28     -28.036   9.745  23.166  1.00 10.68           C  
ANISOU 1133  CB  LEU B  28     1737   1026   1295   -265    217     28       C  
ATOM   1134  CG  LEU B  28     -26.951  10.770  22.808  1.00 11.02           C  
ANISOU 1134  CG  LEU B  28     1758   1087   1341   -235    181      9       C  
ATOM   1135  CD1 LEU B  28     -25.942  10.135  21.848  1.00 11.60           C  
ANISOU 1135  CD1 LEU B  28     1785   1154   1471   -204    119      1       C  
ATOM   1136  CD2 LEU B  28     -27.540  12.065  22.203  1.00 10.52           C  
ANISOU 1136  CD2 LEU B  28     1647   1053   1294   -220    234    -20       C  
ATOM   1137  N   ASN B  29     -27.269   8.722  25.892  1.00 13.76           N  
ANISOU 1137  N   ASN B  29     2329   1353   1545   -349    149    108       N  
ATOM   1138  CA  ASN B  29     -26.319   8.616  26.984  1.00 16.47           C  
ANISOU 1138  CA  ASN B  29     2763   1673   1823   -375     71    145       C  
ATOM   1139  C   ASN B  29     -25.006   8.093  26.440  1.00 17.50           C  
ANISOU 1139  C   ASN B  29     2847   1777   2026   -329    -40    157       C  
ATOM   1140  O   ASN B  29     -24.987   7.131  25.670  1.00 16.01           O  
ANISOU 1140  O   ASN B  29     2604   1565   1916   -302    -59    161       O  
ATOM   1141  CB  ASN B  29     -26.843   7.685  28.072  1.00 16.78           C  
ANISOU 1141  CB  ASN B  29     2907   1677   1791   -440     77    197       C  
ATOM   1142  CG  ASN B  29     -26.066   7.811  29.383  1.00 21.14           C  
ANISOU 1142  CG  ASN B  29     3579   2213   2241   -488      2    239       C  
ATOM   1143  ND2 ASN B  29     -25.854   6.691  30.044  1.00 26.83           N  
ANISOU 1143  ND2 ASN B  29     4378   2884   2932   -523    -69    308       N  
ATOM   1144  OD1 ASN B  29     -25.681   8.901  29.795  1.00 21.37           O  
ANISOU 1144  OD1 ASN B  29     3631   2269   2218   -497      4    211       O  
ATOM   1145  N   VAL B  30     -23.910   8.732  26.836  1.00 14.49           N  
ANISOU 1145  N   VAL B  30     2481   1397   1627   -321   -109    156       N  
ATOM   1146  CA  VAL B  30     -22.589   8.313  26.391  1.00 17.27           C  
ANISOU 1146  CA  VAL B  30     2778   1718   2066   -278   -213    159       C  
ATOM   1147  C   VAL B  30     -21.707   8.080  27.609  1.00 21.09           C  
ANISOU 1147  C   VAL B  30     3345   2163   2504   -306   -329    210       C  
ATOM   1148  O   VAL B  30     -21.685   8.896  28.534  1.00 20.82           O  
ANISOU 1148  O   VAL B  30     3389   2151   2372   -347   -330    213       O  
ATOM   1149  CB  VAL B  30     -21.947   9.371  25.431  1.00 17.50           C  
ANISOU 1149  CB  VAL B  30     2717   1782   2151   -235   -194     98       C  
ATOM   1150  CG1 VAL B  30     -21.706  10.685  26.159  1.00 22.56           C  
ANISOU 1150  CG1 VAL B  30     3403   2451   2718   -257   -187     84       C  
ATOM   1151  CG2 VAL B  30     -20.639   8.852  24.837  1.00 14.68           C  
ANISOU 1151  CG2 VAL B  30     2285   1388   1905   -194   -278     86       C  
ATOM   1152  N   GLN B  31     -21.015   6.947  27.636  1.00 17.67           N  
ANISOU 1152  N   GLN B  31     2900   1668   2145   -289   -431    250       N  
ATOM   1153  CA  GLN B  31     -20.008   6.708  28.667  1.00 17.40           C  
ANISOU 1153  CA  GLN B  31     2928   1588   2094   -308   -573    304       C  
ATOM   1154  C   GLN B  31     -18.639   6.953  28.063  1.00 18.25           C  
ANISOU 1154  C   GLN B  31     2928   1677   2329   -251   -652    266       C  
ATOM   1155  O   GLN B  31     -18.334   6.443  26.992  1.00 20.91           O  
ANISOU 1155  O   GLN B  31     3158   1993   2796   -201   -638    230       O  
ATOM   1156  CB  GLN B  31     -20.081   5.269  29.192  1.00 18.20           C  
ANISOU 1156  CB  GLN B  31     3088   1616   2212   -327   -654    384       C  
ATOM   1157  N   SER B  32     -17.811   7.724  28.753  1.00 18.89           N  
ANISOU 1157  N   SER B  32     3038   1763   2375   -265   -729    268       N  
ATOM   1158  CA  SER B  32     -16.481   8.028  28.249  1.00 22.75           C  
ANISOU 1158  CA  SER B  32     3420   2232   2994   -218   -801    226       C  
ATOM   1159  C   SER B  32     -15.580   8.563  29.348  1.00 20.57           C  
ANISOU 1159  C   SER B  32     3201   1943   2673   -247   -929    252       C  
ATOM   1160  O   SER B  32     -16.017   9.306  30.224  1.00 21.32           O  
ANISOU 1160  O   SER B  32     3403   2078   2618   -303   -910    265       O  
ATOM   1161  CB  SER B  32     -16.550   9.046  27.102  1.00 26.75           C  
ANISOU 1161  CB  SER B  32     3832   2796   3534   -188   -678    139       C  
ATOM   1162  OG  SER B  32     -17.114  10.259  27.537  1.00 33.06           O  
ANISOU 1162  OG  SER B  32     4697   3656   4209   -224   -607    123       O  
ATOM   1163  N   LYS B  33     -14.313   8.185  29.279  1.00 20.55           N  
ANISOU 1163  N   LYS B  33     3119   1880   2810   -211  -1059    254       N  
ATOM   1164  CA  LYS B  33     -13.310   8.675  30.206  1.00 20.49           C  
ANISOU 1164  CA  LYS B  33     3142   1855   2790   -233  -1202    273       C  
ATOM   1165  C   LYS B  33     -12.012   8.826  29.432  1.00 19.51           C  
ANISOU 1165  C   LYS B  33     2856   1695   2862   -174  -1250    211       C  
ATOM   1166  O   LYS B  33     -11.483   7.847  28.911  1.00 21.67           O  
ANISOU 1166  O   LYS B  33     3034   1899   3300   -127  -1301    212       O  
ATOM   1167  CB  LYS B  33     -13.126   7.697  31.375  1.00 22.06           C  
ANISOU 1167  CB  LYS B  33     3446   1986   2949   -269  -1371    380       C  
ATOM   1168  CG  LYS B  33     -12.129   8.174  32.428  1.00 27.16           C  
ANISOU 1168  CG  LYS B  33     4142   2614   3564   -303  -1543    410       C  
ATOM   1169  CD  LYS B  33     -12.040   7.194  33.594  1.00 32.38           C  
ANISOU 1169  CD  LYS B  33     4930   3208   4165   -349  -1718    530       C  
ATOM   1170  CE  LYS B  33     -11.072   7.684  34.664  1.00 38.11           C  
ANISOU 1170  CE  LYS B  33     5717   3919   4846   -393  -1905    563       C  
ATOM   1171  NZ  LYS B  33     -11.498   9.010  35.220  1.00 37.78           N1+
ANISOU 1171  NZ  LYS B  33     5777   3968   4608   -462  -1818    518       N1+
ATOM   1172  N   PRO B  34     -11.497  10.058  29.328  1.00 18.17           N  
ANISOU 1172  N   PRO B  34     2650   1568   2687   -179  -1223    149       N  
ATOM   1173  CA  PRO B  34     -12.055  11.318  29.833  1.00 16.18           C  
ANISOU 1173  CA  PRO B  34     2491   1391   2267   -230  -1149    130       C  
ATOM   1174  C   PRO B  34     -13.414  11.652  29.222  1.00 16.59           C  
ANISOU 1174  C   PRO B  34     2573   1505   2227   -236   -962    106       C  
ATOM   1175  O   PRO B  34     -13.775  11.131  28.158  1.00 13.29           O  
ANISOU 1175  O   PRO B  34     2079   1085   1886   -195   -877     84       O  
ATOM   1176  CB  PRO B  34     -11.030  12.363  29.367  1.00 14.45           C  
ANISOU 1176  CB  PRO B  34     2166   1182   2143   -210  -1146     52       C  
ATOM   1177  CG  PRO B  34      -9.751  11.608  29.240  1.00 19.77           C  
ANISOU 1177  CG  PRO B  34     2729   1777   3008   -169  -1287     54       C  
ATOM   1178  CD  PRO B  34     -10.148  10.236  28.765  1.00 18.72           C  
ANISOU 1178  CD  PRO B  34     2569   1598   2946   -135  -1280     90       C  
ATOM   1179  N   THR B  35     -14.160  12.530  29.881  1.00 16.93           N  
ANISOU 1179  N   THR B  35     2720   1600   2112   -288   -898    103       N  
ATOM   1180  CA  THR B  35     -15.448  12.947  29.346  1.00 20.66           C  
ANISOU 1180  CA  THR B  35     3210   2125   2515   -291   -728     77       C  
ATOM   1181  C   THR B  35     -15.244  13.519  27.940  1.00 18.75           C  
ANISOU 1181  C   THR B  35     2838   1904   2382   -240   -633      9       C  
ATOM   1182  O   THR B  35     -14.270  14.228  27.669  1.00 19.08           O  
ANISOU 1182  O   THR B  35     2812   1942   2493   -226   -659    -34       O  
ATOM   1183  CB  THR B  35     -16.157  13.958  30.261  1.00 25.78           C  
ANISOU 1183  CB  THR B  35     3972   2818   3006   -354   -667     67       C  
ATOM   1184  CG2 THR B  35     -16.283  13.401  31.666  1.00 24.91           C  
ANISOU 1184  CG2 THR B  35     4006   2689   2769   -421   -759    132       C  
ATOM   1185  OG1 THR B  35     -15.395  15.168  30.315  1.00 29.26           O  
ANISOU 1185  OG1 THR B  35     4382   3275   3462   -358   -678     13       O  
ATOM   1186  N   ALA B  36     -16.175  13.190  27.056  1.00 16.78           N  
ANISOU 1186  N   ALA B  36     2561   1674   2143   -219   -526      3       N  
ATOM   1187  CA  ALA B  36     -16.057  13.468  25.636  1.00 17.05           C  
ANISOU 1187  CA  ALA B  36     2487   1723   2269   -179   -444    -49       C  
ATOM   1188  C   ALA B  36     -16.418  14.892  25.260  1.00 15.47           C  
ANISOU 1188  C   ALA B  36     2282   1570   2028   -187   -345    -91       C  
ATOM   1189  O   ALA B  36     -17.271  15.519  25.900  1.00 14.11           O  
ANISOU 1189  O   ALA B  36     2185   1423   1755   -218   -297    -83       O  
ATOM   1190  CB  ALA B  36     -16.950  12.503  24.862  1.00 15.34           C  
ANISOU 1190  CB  ALA B  36     2252   1507   2071   -161   -383    -36       C  
ATOM   1191  N   GLU B  37     -15.773  15.394  24.209  1.00 11.73           N  
ANISOU 1191  N   GLU B  37     1719   1101   1638   -163   -310   -137       N  
ATOM   1192  CA  GLU B  37     -16.290  16.537  23.469  1.00 16.05           C  
ANISOU 1192  CA  GLU B  37     2251   1685   2163   -164   -205   -166       C  
ATOM   1193  C   GLU B  37     -17.506  16.090  22.656  1.00 13.29           C  
ANISOU 1193  C   GLU B  37     1900   1357   1793   -154   -126   -151       C  
ATOM   1194  O   GLU B  37     -17.521  14.994  22.106  1.00 15.26           O  
ANISOU 1194  O   GLU B  37     2117   1594   2086   -138   -137   -145       O  
ATOM   1195  CB  GLU B  37     -15.229  17.113  22.517  1.00 15.75           C  
ANISOU 1195  CB  GLU B  37     2126   1643   2216   -152   -187   -215       C  
ATOM   1196  CG  GLU B  37     -13.941  17.523  23.194  1.00 22.43           C  
ANISOU 1196  CG  GLU B  37     2951   2463   3110   -160   -268   -239       C  
ATOM   1197  CD  GLU B  37     -12.918  18.087  22.210  1.00 27.69           C  
ANISOU 1197  CD  GLU B  37     3524   3121   3875   -155   -232   -293       C  
ATOM   1198  OE1 GLU B  37     -13.136  17.964  20.990  1.00 29.25           O  
ANISOU 1198  OE1 GLU B  37     3682   3333   4100   -147   -151   -310       O  
ATOM   1199  OE2 GLU B  37     -11.896  18.649  22.653  1.00 28.94           O1-
ANISOU 1199  OE2 GLU B  37     3654   3261   4082   -165   -282   -322       O1-
ATOM   1200  N   VAL B  38     -18.512  16.951  22.553  1.00 11.49           N  
ANISOU 1200  N   VAL B  38     1700   1156   1510   -163    -51   -150       N  
ATOM   1201  CA  VAL B  38     -19.731  16.598  21.840  1.00 13.02           C  
ANISOU 1201  CA  VAL B  38     1889   1368   1689   -155     11   -134       C  
ATOM   1202  C   VAL B  38     -20.043  17.635  20.778  1.00 14.31           C  
ANISOU 1202  C   VAL B  38     2017   1552   1867   -149     77   -149       C  
ATOM   1203  O   VAL B  38     -20.019  18.829  21.048  1.00 13.17           O  
ANISOU 1203  O   VAL B  38     1885   1409   1710   -157    100   -160       O  
ATOM   1204  CB  VAL B  38     -20.940  16.503  22.797  1.00 17.21           C  
ANISOU 1204  CB  VAL B  38     2487   1902   2149   -175     37   -109       C  
ATOM   1205  CG1 VAL B  38     -22.219  16.301  22.011  1.00 16.93           C  
ANISOU 1205  CG1 VAL B  38     2431   1884   2120   -167    100    -99       C  
ATOM   1206  CG2 VAL B  38     -20.726  15.376  23.815  1.00 18.35           C  
ANISOU 1206  CG2 VAL B  38     2683   2024   2265   -192    -30    -80       C  
ATOM   1207  N   LYS B  39     -20.318  17.168  19.566  1.00 10.70           N  
ANISOU 1207  N   LYS B  39     1522   1108   1436   -140    101   -149       N  
ATOM   1208  CA  LYS B  39     -20.763  18.044  18.483  1.00 11.84           C  
ANISOU 1208  CA  LYS B  39     1647   1271   1582   -141    151   -148       C  
ATOM   1209  C   LYS B  39     -22.052  17.505  17.898  1.00 11.05           C  
ANISOU 1209  C   LYS B  39     1545   1186   1467   -138    172   -124       C  
ATOM   1210  O   LYS B  39     -22.200  16.295  17.749  1.00 11.07           O  
ANISOU 1210  O   LYS B  39     1542   1189   1476   -137    157   -124       O  
ATOM   1211  CB  LYS B  39     -19.703  18.109  17.386  1.00 14.43           C  
ANISOU 1211  CB  LYS B  39     1934   1602   1946   -148    159   -176       C  
ATOM   1212  CG  LYS B  39     -18.531  19.026  17.727  1.00 19.15           C  
ANISOU 1212  CG  LYS B  39     2521   2185   2571   -155    152   -202       C  
ATOM   1213  CD  LYS B  39     -17.482  18.993  16.627  1.00 25.92           C  
ANISOU 1213  CD  LYS B  39     3333   3043   3473   -169    176   -238       C  
ATOM   1214  CE  LYS B  39     -16.357  19.971  16.923  1.00 32.37           C  
ANISOU 1214  CE  LYS B  39     4130   3841   4326   -180    176   -267       C  
ATOM   1215  NZ  LYS B  39     -16.838  21.382  16.854  1.00 38.98           N1+
ANISOU 1215  NZ  LYS B  39     4997   4681   5131   -191    210   -245       N1+
ATOM   1216  N   TRP B  40     -22.972  18.402  17.560  1.00 11.34           N  
ANISOU 1216  N   TRP B  40     1584   1229   1497   -137    203   -106       N  
ATOM   1217  CA  TRP B  40     -24.248  18.004  16.987  1.00 14.23           C  
ANISOU 1217  CA  TRP B  40     1939   1606   1863   -135    213    -83       C  
ATOM   1218  C   TRP B  40     -24.328  18.434  15.535  1.00 14.65           C  
ANISOU 1218  C   TRP B  40     1975   1675   1916   -144    213    -71       C  
ATOM   1219  O   TRP B  40     -23.718  19.444  15.162  1.00 11.31           O  
ANISOU 1219  O   TRP B  40     1554   1248   1495   -151    222    -70       O  
ATOM   1220  CB  TRP B  40     -25.394  18.647  17.768  1.00 13.13           C  
ANISOU 1220  CB  TRP B  40     1806   1451   1730   -129    240    -71       C  
ATOM   1221  CG  TRP B  40     -25.643  18.002  19.090  1.00 12.99           C  
ANISOU 1221  CG  TRP B  40     1820   1424   1693   -136    249    -79       C  
ATOM   1222  CD1 TRP B  40     -25.073  18.330  20.282  1.00 12.58           C  
ANISOU 1222  CD1 TRP B  40     1808   1358   1614   -146    250    -95       C  
ATOM   1223  CD2 TRP B  40     -26.526  16.911  19.348  1.00 10.96           C  
ANISOU 1223  CD2 TRP B  40     1565   1166   1432   -142    255    -70       C  
ATOM   1224  CE2 TRP B  40     -26.451  16.635  20.728  1.00 12.95           C  
ANISOU 1224  CE2 TRP B  40     1867   1403   1648   -160    266    -76       C  
ATOM   1225  CE3 TRP B  40     -27.376  16.138  18.548  1.00 13.06           C  
ANISOU 1225  CE3 TRP B  40     1800   1441   1719   -141    252    -58       C  
ATOM   1226  NE1 TRP B  40     -25.563  17.520  21.276  1.00 11.38           N  
ANISOU 1226  NE1 TRP B  40     1694   1200   1432   -163    258    -91       N  
ATOM   1227  CZ2 TRP B  40     -27.198  15.617  21.327  1.00 11.80           C  
ANISOU 1227  CZ2 TRP B  40     1744   1251   1487   -178    281    -67       C  
ATOM   1228  CZ3 TRP B  40     -28.116  15.131  19.140  1.00 10.12           C  
ANISOU 1228  CZ3 TRP B  40     1439   1061   1344   -154    267    -55       C  
ATOM   1229  CH2 TRP B  40     -28.028  14.885  20.519  1.00 12.00           C  
ANISOU 1229  CH2 TRP B  40     1730   1283   1547   -173    285    -57       C  
ATOM   1230  N   TYR B  41     -25.085  17.667  14.739  1.00 12.38           N  
ANISOU 1230  N   TYR B  41     1676   1405   1623   -151    203    -60       N  
ATOM   1231  CA  TYR B  41     -25.253  17.893  13.298  1.00 13.48           C  
ANISOU 1231  CA  TYR B  41     1814   1564   1743   -172    193    -44       C  
ATOM   1232  C   TYR B  41     -26.698  17.683  12.888  1.00 15.41           C  
ANISOU 1232  C   TYR B  41     2044   1815   1998   -171    170    -14       C  
ATOM   1233  O   TYR B  41     -27.379  16.816  13.440  1.00 13.99           O  
ANISOU 1233  O   TYR B  41     1850   1631   1835   -162    170    -21       O  
ATOM   1234  CB  TYR B  41     -24.396  16.904  12.494  1.00 14.54           C  
ANISOU 1234  CB  TYR B  41     1950   1719   1857   -198    197    -81       C  
ATOM   1235  CG  TYR B  41     -22.931  17.051  12.772  1.00 15.59           C  
ANISOU 1235  CG  TYR B  41     2079   1840   2002   -200    218   -117       C  
ATOM   1236  CD1 TYR B  41     -22.116  17.798  11.928  1.00 14.28           C  
ANISOU 1236  CD1 TYR B  41     1923   1683   1821   -228    241   -127       C  
ATOM   1237  CD2 TYR B  41     -22.368  16.489  13.907  1.00 10.22           C  
ANISOU 1237  CD2 TYR B  41     1389   1139   1355   -178    209   -139       C  
ATOM   1238  CE1 TYR B  41     -20.767  17.966  12.210  1.00 22.57           C  
ANISOU 1238  CE1 TYR B  41     2957   2718   2900   -232    263   -167       C  
ATOM   1239  CE2 TYR B  41     -21.023  16.641  14.187  1.00 13.34           C  
ANISOU 1239  CE2 TYR B  41     1771   1520   1779   -179    213   -173       C  
ATOM   1240  CZ  TYR B  41     -20.226  17.378  13.338  1.00 20.41           C  
ANISOU 1240  CZ  TYR B  41     2661   2422   2672   -204    243   -191       C  
ATOM   1241  OH  TYR B  41     -18.882  17.527  13.620  1.00 19.95           O  
ANISOU 1241  OH  TYR B  41     2577   2345   2660   -206    250   -232       O  
ATOM   1242  N   HIS B  42     -27.156  18.470  11.918  1.00 14.83           N  
ANISOU 1242  N   HIS B  42     1973   1744   1916   -184    144     23       N  
ATOM   1243  CA  HIS B  42     -28.476  18.286  11.309  1.00 16.28           C  
ANISOU 1243  CA  HIS B  42     2138   1933   2116   -187    102     55       C  
ATOM   1244  C   HIS B  42     -28.223  18.083   9.831  1.00 15.88           C  
ANISOU 1244  C   HIS B  42     2119   1915   2001   -233     71     65       C  
ATOM   1245  O   HIS B  42     -27.658  18.956   9.182  1.00 14.06           O  
ANISOU 1245  O   HIS B  42     1922   1685   1737   -255     67     87       O  
ATOM   1246  CB  HIS B  42     -29.359  19.526  11.523  1.00 15.23           C  
ANISOU 1246  CB  HIS B  42     1980   1763   2042   -163     83     98       C  
ATOM   1247  CG  HIS B  42     -30.688  19.455  10.823  1.00 16.46           C  
ANISOU 1247  CG  HIS B  42     2104   1916   2234   -165     22    135       C  
ATOM   1248  CD2 HIS B  42     -31.494  18.405  10.532  1.00 15.50           C  
ANISOU 1248  CD2 HIS B  42     1958   1811   2118   -176     -4    127       C  
ATOM   1249  ND1 HIS B  42     -31.334  20.575  10.327  1.00 14.80           N  
ANISOU 1249  ND1 HIS B  42     1878   1674   2071   -157    -29    190       N  
ATOM   1250  CE1 HIS B  42     -32.477  20.214   9.772  1.00 15.23           C  
ANISOU 1250  CE1 HIS B  42     1898   1729   2161   -161    -91    215       C  
ATOM   1251  NE2 HIS B  42     -32.601  18.903   9.884  1.00 16.88           N  
ANISOU 1251  NE2 HIS B  42     2101   1969   2343   -174    -74    174       N  
ATOM   1252  N   ASN B  43     -28.597  16.917   9.307  1.00 18.51           N  
ANISOU 1252  N   ASN B  43     2449   2272   2311   -255     55     44       N  
ATOM   1253  CA  ASN B  43     -28.355  16.611   7.903  1.00 17.49           C  
ANISOU 1253  CA  ASN B  43     2362   2178   2107   -311     33     41       C  
ATOM   1254  C   ASN B  43     -26.897  16.897   7.510  1.00 20.12           C  
ANISOU 1254  C   ASN B  43     2734   2522   2388   -341     84     11       C  
ATOM   1255  O   ASN B  43     -26.631  17.474   6.453  1.00 16.40           O  
ANISOU 1255  O   ASN B  43     2312   2067   1853   -389     74     33       O  
ATOM   1256  CB  ASN B  43     -29.325  17.390   6.996  1.00 19.03           C  
ANISOU 1256  CB  ASN B  43     2570   2374   2287   -331    -44    108       C  
ATOM   1257  CG  ASN B  43     -30.773  16.934   7.160  1.00 21.18           C  
ANISOU 1257  CG  ASN B  43     2790   2637   2619   -311    -99    126       C  
ATOM   1258  ND2 ASN B  43     -31.724  17.798   6.795  1.00 22.46           N  
ANISOU 1258  ND2 ASN B  43     2936   2778   2818   -304   -174    191       N  
ATOM   1259  OD1 ASN B  43     -31.029  15.821   7.614  1.00 16.72           O  
ANISOU 1259  OD1 ASN B  43     2197   2078   2078   -302    -76     83       O  
ATOM   1260  N   GLY B  44     -25.958  16.500   8.365  1.00 18.11           N  
ANISOU 1260  N   GLY B  44     2460   2255   2167   -318    137    -38       N  
ATOM   1261  CA  GLY B  44     -24.549  16.621   8.031  1.00 19.13           C  
ANISOU 1261  CA  GLY B  44     2608   2388   2272   -345    190    -80       C  
ATOM   1262  C   GLY B  44     -23.928  17.984   8.313  1.00 16.91           C  
ANISOU 1262  C   GLY B  44     2338   2088   2000   -338    206    -54       C  
ATOM   1263  O   GLY B  44     -22.728  18.174   8.124  1.00 17.69           O  
ANISOU 1263  O   GLY B  44     2443   2186   2093   -361    255    -92       O  
ATOM   1264  N   VAL B  45     -24.731  18.935   8.768  1.00 10.75           N  
ANISOU 1264  N   VAL B  45     1552   1286   1245   -307    170      4       N  
ATOM   1265  CA  VAL B  45     -24.220  20.281   8.995  1.00 13.52           C  
ANISOU 1265  CA  VAL B  45     1915   1612   1610   -303    184     29       C  
ATOM   1266  C   VAL B  45     -24.180  20.580  10.487  1.00 14.10           C  
ANISOU 1266  C   VAL B  45     1953   1655   1750   -249    196     17       C  
ATOM   1267  O   VAL B  45     -25.192  20.439  11.188  1.00 16.74           O  
ANISOU 1267  O   VAL B  45     2264   1976   2121   -215    175     32       O  
ATOM   1268  CB  VAL B  45     -25.101  21.340   8.313  1.00 16.44           C  
ANISOU 1268  CB  VAL B  45     2310   1969   1968   -314    134    105       C  
ATOM   1269  CG1 VAL B  45     -24.450  22.712   8.437  1.00 18.12           C  
ANISOU 1269  CG1 VAL B  45     2540   2149   2197   -317    155    129       C  
ATOM   1270  CG2 VAL B  45     -25.322  20.986   6.844  1.00 20.19           C  
ANISOU 1270  CG2 VAL B  45     2835   2479   2359   -376    105    126       C  
ATOM   1271  N   GLU B  46     -23.025  21.000  10.984  1.00 15.47           N  
ANISOU 1271  N   GLU B  46     2124   1815   1939   -249    231    -15       N  
ATOM   1272  CA  GLU B  46     -22.878  21.194  12.429  1.00 18.39           C  
ANISOU 1272  CA  GLU B  46     2472   2159   2355   -210    237    -34       C  
ATOM   1273  C   GLU B  46     -23.865  22.220  12.972  1.00 18.65           C  
ANISOU 1273  C   GLU B  46     2502   2162   2421   -184    226      5       C  
ATOM   1274  O   GLU B  46     -24.040  23.293  12.376  1.00 18.92           O  
ANISOU 1274  O   GLU B  46     2548   2177   2462   -194    220     43       O  
ATOM   1275  CB  GLU B  46     -21.442  21.591  12.804  1.00 23.19           C  
ANISOU 1275  CB  GLU B  46     3077   2756   2980   -219    265    -74       C  
ATOM   1276  CG  GLU B  46     -21.244  21.729  14.324  1.00 26.78           C  
ANISOU 1276  CG  GLU B  46     3521   3188   3467   -188    259    -95       C  
ATOM   1277  CD  GLU B  46     -19.792  21.933  14.729  1.00 27.88           C  
ANISOU 1277  CD  GLU B  46     3646   3315   3631   -198    269   -139       C  
ATOM   1278  OE1 GLU B  46     -18.920  21.965  13.836  1.00 29.69           O  
ANISOU 1278  OE1 GLU B  46     3866   3551   3864   -226    293   -160       O  
ATOM   1279  OE2 GLU B  46     -19.528  22.051  15.948  1.00 27.70           O1-
ANISOU 1279  OE2 GLU B  46     3625   3277   3625   -182    252   -156       O1-
ATOM   1280  N   LEU B  47     -24.508  21.887  14.096  1.00 14.40           N  
ANISOU 1280  N   LEU B  47     1948   1613   1909   -155    228     -7       N  
ATOM   1281  CA  LEU B  47     -25.441  22.798  14.776  1.00 16.46           C  
ANISOU 1281  CA  LEU B  47     2197   1838   2218   -132    236     10       C  
ATOM   1282  C   LEU B  47     -24.693  23.684  15.765  1.00 20.99           C  
ANISOU 1282  C   LEU B  47     2781   2386   2807   -128    265    -19       C  
ATOM   1283  O   LEU B  47     -23.613  23.321  16.249  1.00 20.85           O  
ANISOU 1283  O   LEU B  47     2777   2381   2766   -138    269    -54       O  
ATOM   1284  CB  LEU B  47     -26.534  22.021  15.540  1.00 13.79           C  
ANISOU 1284  CB  LEU B  47     1841   1500   1898   -115    242      2       C  
ATOM   1285  CG  LEU B  47     -27.650  21.330  14.746  1.00 12.58           C  
ANISOU 1285  CG  LEU B  47     1664   1361   1756   -114    212     29       C  
ATOM   1286  CD1 LEU B  47     -28.497  20.422  15.645  1.00 13.12           C  
ANISOU 1286  CD1 LEU B  47     1717   1428   1840   -106    233      9       C  
ATOM   1287  CD2 LEU B  47     -28.535  22.379  14.091  1.00 13.73           C  
ANISOU 1287  CD2 LEU B  47     1784   1476   1955   -104    186     74       C  
ATOM   1288  N   GLN B  48     -25.276  24.841  16.063  1.00 19.06           N  
ANISOU 1288  N   GLN B  48     2527   2101   2615   -115    281     -8       N  
ATOM   1289  CA  GLN B  48     -24.773  25.721  17.121  1.00 20.33           C  
ANISOU 1289  CA  GLN B  48     2698   2231   2794   -115    315    -45       C  
ATOM   1290  C   GLN B  48     -25.918  26.139  18.031  1.00 18.87           C  
ANISOU 1290  C   GLN B  48     2497   2012   2661    -98    351    -62       C  
ATOM   1291  O   GLN B  48     -27.071  26.204  17.592  1.00 17.44           O  
ANISOU 1291  O   GLN B  48     2281   1813   2531    -80    345    -33       O  
ATOM   1292  CB  GLN B  48     -24.121  26.973  16.518  1.00 23.34           C  
ANISOU 1292  CB  GLN B  48     3084   2583   3201   -125    317    -28       C  
ATOM   1293  CG  GLN B  48     -22.841  26.687  15.733  1.00 23.99           C  
ANISOU 1293  CG  GLN B  48     3182   2695   3239   -152    305    -29       C  
ATOM   1294  N   GLU B  49     -25.602  26.431  19.289  1.00 18.28           N  
ANISOU 1294  N   GLU B  49     2446   1925   2576   -108    388   -112       N  
ATOM   1295  CA  GLU B  49     -26.609  26.921  20.228  1.00 20.08           C  
ANISOU 1295  CA  GLU B  49     2663   2116   2852   -103    445   -146       C  
ATOM   1296  C   GLU B  49     -27.269  28.170  19.639  1.00 21.64           C  
ANISOU 1296  C   GLU B  49     2815   2255   3154    -80    454   -124       C  
ATOM   1297  O   GLU B  49     -26.600  29.018  19.043  1.00 20.70           O  
ANISOU 1297  O   GLU B  49     2698   2115   3053    -80    434   -102       O  
ATOM   1298  CB  GLU B  49     -25.980  27.269  21.578  1.00 21.38           C  
ANISOU 1298  CB  GLU B  49     2873   2274   2976   -130    483   -208       C  
ATOM   1299  CG  GLU B  49     -25.111  26.185  22.184  1.00 23.75           C  
ANISOU 1299  CG  GLU B  49     3224   2622   3180   -155    450   -220       C  
ATOM   1300  CD  GLU B  49     -25.907  25.071  22.852  1.00 25.96           C  
ANISOU 1300  CD  GLU B  49     3525   2921   3418   -167    469   -224       C  
ATOM   1301  OE1 GLU B  49     -27.109  24.906  22.563  1.00 22.39           O  
ANISOU 1301  OE1 GLU B  49     3036   2457   3015   -152    500   -213       O  
ATOM   1302  OE2 GLU B  49     -25.312  24.354  23.680  1.00 29.76           O1-
ANISOU 1302  OE2 GLU B  49     4061   3425   3821   -194    448   -238       O1-
ATOM   1303  N   SER B  50     -28.578  28.282  19.814  1.00 18.10           N  
ANISOU 1303  N   SER B  50     2321   1772   2784    -62    485   -129       N  
ATOM   1304  CA  SER B  50     -29.322  29.436  19.331  1.00 21.54           C  
ANISOU 1304  CA  SER B  50     2701   2137   3345    -34    485   -108       C  
ATOM   1305  C   SER B  50     -30.609  29.529  20.134  1.00 23.55           C  
ANISOU 1305  C   SER B  50     2906   2349   3691    -24    554   -157       C  
ATOM   1306  O   SER B  50     -30.835  28.726  21.040  1.00 26.56           O  
ANISOU 1306  O   SER B  50     3311   2762   4020    -46    605   -204       O  
ATOM   1307  CB  SER B  50     -29.653  29.257  17.855  1.00 19.12           C  
ANISOU 1307  CB  SER B  50     2369   1837   3061    -17    400    -23       C  
ATOM   1308  OG  SER B  50     -30.469  28.116  17.684  1.00 18.79           O  
ANISOU 1308  OG  SER B  50     2304   1829   3007    -13    383    -13       O  
ATOM   1309  N   SER B  51     -31.456  30.500  19.807  1.00 23.10           N  
ANISOU 1309  N   SER B  51     2781   2215   3780      7    557   -145       N  
ATOM   1310  CA  SER B  51     -32.745  30.607  20.473  1.00 21.52           C  
ANISOU 1310  CA  SER B  51     2514   1964   3697     19    629   -199       C  
ATOM   1311  C   SER B  51     -33.641  29.419  20.112  1.00 20.16           C  
ANISOU 1311  C   SER B  51     2305   1828   3526     24    602   -174       C  
ATOM   1312  O   SER B  51     -34.610  29.135  20.802  1.00 24.79           O  
ANISOU 1312  O   SER B  51     2847   2394   4177     20    675   -229       O  
ATOM   1313  CB  SER B  51     -33.429  31.930  20.124  1.00 25.45           C  
ANISOU 1313  CB  SER B  51     2931   2358   4380     57    626   -190       C  
ATOM   1314  OG  SER B  51     -33.498  32.122  18.724  1.00 28.02           O  
ANISOU 1314  OG  SER B  51     3232   2670   4742     84    507    -86       O  
ATOM   1315  N   LYS B  52     -33.291  28.722  19.037  1.00 20.23           N  
ANISOU 1315  N   LYS B  52     2335   1890   3462     27    504    -99       N  
ATOM   1316  CA  LYS B  52     -34.078  27.603  18.528  1.00 20.78           C  
ANISOU 1316  CA  LYS B  52     2371   1994   3531     30    463    -70       C  
ATOM   1317  C   LYS B  52     -33.497  26.239  18.938  1.00 21.61           C  
ANISOU 1317  C   LYS B  52     2545   2180   3486     -4    479    -88       C  
ATOM   1318  O   LYS B  52     -34.235  25.283  19.198  1.00 24.85           O  
ANISOU 1318  O   LYS B  52     2935   2609   3900    -14    502   -105       O  
ATOM   1319  CB  LYS B  52     -34.146  27.681  17.002  1.00 24.31           C  
ANISOU 1319  CB  LYS B  52     2800   2443   3993     47    341     22       C  
ATOM   1320  CG  LYS B  52     -34.953  26.560  16.362  1.00 28.56           C  
ANISOU 1320  CG  LYS B  52     3304   3015   4530     46    285     51       C  
ATOM   1321  CD  LYS B  52     -34.783  26.538  14.851  1.00 28.99           C  
ANISOU 1321  CD  LYS B  52     3375   3090   4551     44    161    140       C  
ATOM   1322  CE  LYS B  52     -35.617  25.415  14.219  1.00 25.47           C  
ANISOU 1322  CE  LYS B  52     2895   2678   4105     37    102    161       C  
ATOM   1323  NZ  LYS B  52     -37.083  25.695  14.240  1.00 24.39           N1+
ANISOU 1323  NZ  LYS B  52     2647   2476   4143     67     83    161       N1+
ATOM   1324  N   ILE B  53     -32.172  26.159  18.974  1.00 18.16           N  
ANISOU 1324  N   ILE B  53     2184   1785   2932    -23    463    -82       N  
ATOM   1325  CA  ILE B  53     -31.468  24.918  19.250  1.00 17.52           C  
ANISOU 1325  CA  ILE B  53     2163   1769   2723    -50    458    -90       C  
ATOM   1326  C   ILE B  53     -30.763  25.007  20.588  1.00 18.04           C  
ANISOU 1326  C   ILE B  53     2291   1841   2722    -78    522   -147       C  
ATOM   1327  O   ILE B  53     -29.912  25.875  20.792  1.00 14.96           O  
ANISOU 1327  O   ILE B  53     1929   1438   2318    -82    525   -160       O  
ATOM   1328  CB  ILE B  53     -30.391  24.635  18.175  1.00 18.02           C  
ANISOU 1328  CB  ILE B  53     2261   1874   2710    -53    381    -41       C  
ATOM   1329  CG1 ILE B  53     -31.042  24.409  16.813  1.00 21.66           C  
ANISOU 1329  CG1 ILE B  53     2683   2341   3207    -41    309     17       C  
ATOM   1330  CG2 ILE B  53     -29.506  23.422  18.573  1.00 13.99           C  
ANISOU 1330  CG2 ILE B  53     1807   1419   2091    -78    377    -58       C  
ATOM   1331  CD1 ILE B  53     -31.845  23.116  16.725  1.00 21.30           C  
ANISOU 1331  CD1 ILE B  53     2616   2324   3155    -47    300     16       C  
ATOM   1332  N   HIS B  54     -31.092  24.101  21.498  1.00 16.16           N  
ANISOU 1332  N   HIS B  54     2081   1622   2437   -104    568   -179       N  
ATOM   1333  CA  HIS B  54     -30.340  24.008  22.738  1.00 18.78           C  
ANISOU 1333  CA  HIS B  54     2491   1967   2676   -142    607   -222       C  
ATOM   1334  C   HIS B  54     -29.935  22.581  23.040  1.00 19.14           C  
ANISOU 1334  C   HIS B  54     2591   2059   2623   -167    577   -206       C  
ATOM   1335  O   HIS B  54     -30.780  21.694  23.228  1.00 16.86           O  
ANISOU 1335  O   HIS B  54     2295   1776   2336   -179    603   -205       O  
ATOM   1336  CB  HIS B  54     -31.122  24.585  23.925  1.00 26.40           C  
ANISOU 1336  CB  HIS B  54     3462   2894   3676   -168    714   -290       C  
ATOM   1337  CG  HIS B  54     -30.316  24.659  25.187  1.00 33.85           C  
ANISOU 1337  CG  HIS B  54     4500   3851   4512   -218    746   -335       C  
ATOM   1338  CD2 HIS B  54     -29.001  24.916  25.387  1.00 36.98           C  
ANISOU 1338  CD2 HIS B  54     4952   4267   4834   -229    695   -332       C  
ATOM   1339  ND1 HIS B  54     -30.860  24.451  26.437  1.00 38.47           N  
ANISOU 1339  ND1 HIS B  54     5135   4430   5053   -270    838   -391       N  
ATOM   1340  CE1 HIS B  54     -29.914  24.575  27.351  1.00 39.04           C  
ANISOU 1340  CE1 HIS B  54     5299   4519   5016   -314    831   -415       C  
ATOM   1341  NE2 HIS B  54     -28.777  24.856  26.740  1.00 38.56           N  
ANISOU 1341  NE2 HIS B  54     5236   4471   4942   -286    741   -381       N  
ATOM   1342  N   TYR B  55     -28.634  22.358  23.086  1.00 18.33           N  
ANISOU 1342  N   TYR B  55     2538   1983   2445   -174    521   -194       N  
ATOM   1343  CA  TYR B  55     -28.121  21.053  23.455  1.00 19.32           C  
ANISOU 1343  CA  TYR B  55     2713   2138   2488   -195    482   -178       C  
ATOM   1344  C   TYR B  55     -27.261  21.177  24.699  1.00 26.08           C  
ANISOU 1344  C   TYR B  55     3651   2996   3261   -234    480   -204       C  
ATOM   1345  O   TYR B  55     -26.506  22.152  24.866  1.00 24.84           O  
ANISOU 1345  O   TYR B  55     3505   2831   3104   -235    472   -226       O  
ATOM   1346  CB  TYR B  55     -27.343  20.406  22.307  1.00 14.96           C  
ANISOU 1346  CB  TYR B  55     2137   1610   1936   -171    403   -139       C  
ATOM   1347  CG  TYR B  55     -26.299  21.292  21.648  1.00 17.46           C  
ANISOU 1347  CG  TYR B  55     2438   1927   2268   -154    368   -137       C  
ATOM   1348  CD1 TYR B  55     -25.025  21.431  22.191  1.00 19.60           C  
ANISOU 1348  CD1 TYR B  55     2747   2201   2497   -168    336   -153       C  
ATOM   1349  CD2 TYR B  55     -26.572  21.941  20.456  1.00 18.80           C  
ANISOU 1349  CD2 TYR B  55     2557   2091   2496   -131    362   -116       C  
ATOM   1350  CE1 TYR B  55     -24.064  22.223  21.576  1.00 22.14           C  
ANISOU 1350  CE1 TYR B  55     3049   2521   2843   -159    313   -156       C  
ATOM   1351  CE2 TYR B  55     -25.614  22.731  19.830  1.00 18.31           C  
ANISOU 1351  CE2 TYR B  55     2489   2027   2443   -125    339   -112       C  
ATOM   1352  CZ  TYR B  55     -24.372  22.871  20.399  1.00 21.43           C  
ANISOU 1352  CZ  TYR B  55     2914   2425   2803   -140    322   -136       C  
ATOM   1353  OH  TYR B  55     -23.437  23.659  19.779  1.00 26.28           O  
ANISOU 1353  OH  TYR B  55     3516   3033   3435   -140    309   -137       O  
ATOM   1354  N   THR B  56     -27.397  20.196  25.582  1.00 23.92           N  
ANISOU 1354  N   THR B  56     3440   2731   2917   -271    484   -200       N  
ATOM   1355  CA  THR B  56     -26.650  20.192  26.830  1.00 29.46           C  
ANISOU 1355  CA  THR B  56     4234   3434   3523   -319    467   -216       C  
ATOM   1356  C   THR B  56     -25.975  18.842  27.044  1.00 22.85           C  
ANISOU 1356  C   THR B  56     3443   2609   2627   -331    382   -170       C  
ATOM   1357  O   THR B  56     -26.340  17.850  26.404  1.00 15.58           O  
ANISOU 1357  O   THR B  56     2490   1693   1737   -311    365   -137       O  
ATOM   1358  CB  THR B  56     -27.565  20.495  28.031  1.00 33.28           C  
ANISOU 1358  CB  THR B  56     4778   3905   3961   -375    568   -261       C  
ATOM   1359  CG2 THR B  56     -28.364  21.757  27.790  1.00 36.38           C  
ANISOU 1359  CG2 THR B  56     5109   4272   4444   -358    659   -310       C  
ATOM   1360  OG1 THR B  56     -28.478  19.411  28.225  1.00 40.11           O  
ANISOU 1360  OG1 THR B  56     5658   4771   4810   -397    604   -241       O  
ATOM   1361  N   ASN B  57     -24.973  18.836  27.921  1.00 17.20           N  
ANISOU 1361  N   ASN B  57     2800   1894   1838   -363    321   -170       N  
ATOM   1362  CA  ASN B  57     -24.265  17.637  28.335  1.00 17.80           C  
ANISOU 1362  CA  ASN B  57     2930   1970   1865   -379    226   -124       C  
ATOM   1363  C   ASN B  57     -24.224  17.651  29.854  1.00 22.12           C  
ANISOU 1363  C   ASN B  57     3601   2512   2290   -454    225   -129       C  
ATOM   1364  O   ASN B  57     -23.539  18.472  30.457  1.00 24.10           O  
ANISOU 1364  O   ASN B  57     3892   2765   2500   -480    201   -158       O  
ATOM   1365  CB  ASN B  57     -22.842  17.641  27.769  1.00 24.80           C  
ANISOU 1365  CB  ASN B  57     3771   2854   2798   -342    121   -113       C  
ATOM   1366  CG  ASN B  57     -22.016  16.454  28.225  1.00 32.58           C  
ANISOU 1366  CG  ASN B  57     4798   3824   3759   -353      8    -67       C  
ATOM   1367  ND2 ASN B  57     -20.875  16.246  27.569  1.00 36.55           N  
ANISOU 1367  ND2 ASN B  57     5236   4317   4335   -313    -74    -62       N  
ATOM   1368  OD1 ASN B  57     -22.387  15.733  29.152  1.00 35.76           O  
ANISOU 1368  OD1 ASN B  57     5287   4217   4082   -398     -4    -36       O  
ATOM   1369  N   THR B  58     -24.985  16.764  30.475  1.00 20.92           N  
ANISOU 1369  N   THR B  58     3517   2356   2077   -499    257   -104       N  
ATOM   1370  CA  THR B  58     -24.981  16.653  31.925  1.00 23.18           C  
ANISOU 1370  CA  THR B  58     3942   2639   2226   -586    257   -101       C  
ATOM   1371  C   THR B  58     -24.541  15.247  32.291  1.00 25.20           C  
ANISOU 1371  C   THR B  58     4262   2878   2434   -606    149    -23       C  
ATOM   1372  O   THR B  58     -25.309  14.298  32.158  1.00 19.94           O  
ANISOU 1372  O   THR B  58     3599   2201   1776   -612    184      9       O  
ATOM   1373  CB  THR B  58     -26.373  16.953  32.522  1.00 25.52           C  
ANISOU 1373  CB  THR B  58     4281   2937   2479   -643    414   -146       C  
ATOM   1374  CG2 THR B  58     -26.324  16.950  34.053  1.00 28.06           C  
ANISOU 1374  CG2 THR B  58     4766   3260   2637   -751    427   -154       C  
ATOM   1375  OG1 THR B  58     -26.824  18.232  32.061  1.00 28.52           O  
ANISOU 1375  OG1 THR B  58     4581   3319   2938   -612    508   -217       O  
ATOM   1376  N   SER B  59     -23.285  15.124  32.714  1.00 29.27           N  
ANISOU 1376  N   SER B  59     4819   3384   2917   -613     11      8       N  
ATOM   1377  CA  SER B  59     -22.719  13.842  33.134  1.00 33.35           C  
ANISOU 1377  CA  SER B  59     5398   3872   3402   -630   -117     88       C  
ATOM   1378  C   SER B  59     -22.954  12.686  32.161  1.00 27.74           C  
ANISOU 1378  C   SER B  59     4603   3139   2797   -571   -133    129       C  
ATOM   1379  O   SER B  59     -23.327  11.585  32.568  1.00 30.18           O  
ANISOU 1379  O   SER B  59     4977   3423   3067   -604   -153    187       O  
ATOM   1380  CB  SER B  59     -23.241  13.457  34.522  1.00 39.12           C  
ANISOU 1380  CB  SER B  59     6297   4598   3968   -736    -99    119       C  
ATOM   1381  OG  SER B  59     -22.887  14.430  35.483  1.00 44.06           O  
ANISOU 1381  OG  SER B  59     7015   5242   4484   -801   -102     80       O  
ATOM   1382  N   GLY B  60     -22.722  12.927  30.880  1.00 24.88           N  
ANISOU 1382  N   GLY B  60     4105   2785   2564   -491   -122     99       N  
ATOM   1383  CA  GLY B  60     -22.857  11.875  29.894  1.00 24.09           C  
ANISOU 1383  CA  GLY B  60     3925   2666   2564   -440   -137    125       C  
ATOM   1384  C   GLY B  60     -24.241  11.835  29.275  1.00 20.70           C  
ANISOU 1384  C   GLY B  60     3452   2254   2159   -433     -5    101       C  
ATOM   1385  O   GLY B  60     -24.424  11.243  28.217  1.00 16.83           O  
ANISOU 1385  O   GLY B  60     2876   1758   1759   -386      0    102       O  
ATOM   1386  N   VAL B  61     -25.214  12.457  29.939  1.00 17.09           N  
ANISOU 1386  N   VAL B  61     3052   1815   1628   -484    101     74       N  
ATOM   1387  CA  VAL B  61     -26.556  12.571  29.387  1.00 13.15           C  
ANISOU 1387  CA  VAL B  61     2496   1327   1171   -477    226     43       C  
ATOM   1388  C   VAL B  61     -26.644  13.765  28.435  1.00 15.55           C  
ANISOU 1388  C   VAL B  61     2698   1656   1555   -424    272    -11       C  
ATOM   1389  O   VAL B  61     -26.476  14.918  28.838  1.00 15.23           O  
ANISOU 1389  O   VAL B  61     2674   1626   1486   -436    303    -50       O  
ATOM   1390  CB  VAL B  61     -27.632  12.692  30.481  1.00 15.07           C  
ANISOU 1390  CB  VAL B  61     2831   1570   1324   -557    336     27       C  
ATOM   1391  CG1 VAL B  61     -29.009  12.760  29.839  1.00 15.92           C  
ANISOU 1391  CG1 VAL B  61     2856   1682   1509   -543    456     -9       C  
ATOM   1392  CG2 VAL B  61     -27.545  11.510  31.465  1.00 13.78           C  
ANISOU 1392  CG2 VAL B  61     2790   1380   1066   -623    289     91       C  
ATOM   1393  N   LEU B  62     -26.881  13.474  27.160  1.00 14.29           N  
ANISOU 1393  N   LEU B  62     2439   1501   1491   -369    271    -11       N  
ATOM   1394  CA  LEU B  62     -26.845  14.498  26.126  1.00 14.31           C  
ANISOU 1394  CA  LEU B  62     2350   1521   1565   -320    292    -45       C  
ATOM   1395  C   LEU B  62     -28.256  14.753  25.671  1.00 17.32           C  
ANISOU 1395  C   LEU B  62     2678   1906   1997   -316    385    -66       C  
ATOM   1396  O   LEU B  62     -28.962  13.816  25.280  1.00 17.12           O  
ANISOU 1396  O   LEU B  62     2627   1876   2001   -315    397    -50       O  
ATOM   1397  CB  LEU B  62     -26.022  14.029  24.918  1.00  7.83           C  
ANISOU 1397  CB  LEU B  62     1461    705    811   -270    218    -32       C  
ATOM   1398  CG  LEU B  62     -24.609  13.526  25.202  1.00 13.97           C  
ANISOU 1398  CG  LEU B  62     2263   1466   1578   -265    116    -12       C  
ATOM   1399  CD1 LEU B  62     -23.855  13.310  23.894  1.00 11.73           C  
ANISOU 1399  CD1 LEU B  62     1895   1186   1376   -219     76    -22       C  
ATOM   1400  CD2 LEU B  62     -23.893  14.520  26.088  1.00 14.74           C  
ANISOU 1400  CD2 LEU B  62     2410   1566   1624   -287     96    -28       C  
ATOM   1401  N  ATHR B  63     -28.680  16.014  25.722  0.54 15.48           N  
ANISOU 1401  N  ATHR B  63     2421   1675   1786   -312    448   -105       N  
ATOM   1402  N  BTHR B  63     -28.682  16.013  25.714  0.46 15.60           N  
ANISOU 1402  N  BTHR B  63     2435   1690   1802   -312    448   -105       N  
ATOM   1403  CA ATHR B  63     -30.013  16.371  25.259  0.54 16.25           C  
ANISOU 1403  CA ATHR B  63     2449   1765   1958   -301    526   -127       C  
ATOM   1404  CA BTHR B  63     -30.022  16.357  25.257  0.46 16.26           C  
ANISOU 1404  CA BTHR B  63     2451   1767   1960   -301    526   -127       C  
ATOM   1405  C  ATHR B  63     -29.949  17.416  24.156  0.54 16.49           C  
ANISOU 1405  C  ATHR B  63     2399   1799   2069   -251    511   -135       C  
ATOM   1406  C  BTHR B  63     -29.978  17.432  24.179  0.46 16.44           C  
ANISOU 1406  C  BTHR B  63     2392   1791   2062   -252    514   -136       C  
ATOM   1407  O  ATHR B  63     -29.090  18.301  24.178  0.54 15.60           O  
ANISOU 1407  O  ATHR B  63     2297   1688   1944   -240    487   -145       O  
ATOM   1408  O  BTHR B  63     -29.160  18.353  24.239  0.46 15.80           O  
ANISOU 1408  O  BTHR B  63     2322   1711   1969   -242    494   -148       O  
ATOM   1409  CB ATHR B  63     -30.902  16.897  26.412  0.54 17.36           C  
ANISOU 1409  CB ATHR B  63     2629   1888   2078   -351    636   -171       C  
ATOM   1410  CB BTHR B  63     -30.922  16.831  26.424  0.46 17.33           C  
ANISOU 1410  CB BTHR B  63     2627   1885   2073   -352    636   -170       C  
ATOM   1411  CG2ATHR B  63     -31.255  15.770  27.364  0.54 18.66           C  
ANISOU 1411  CG2ATHR B  63     2876   2048   2168   -411    666   -156       C  
ATOM   1412  CG2BTHR B  63     -32.349  17.048  25.944  0.46 15.95           C  
ANISOU 1412  CG2BTHR B  63     2364   1693   2005   -339    714   -195       C  
ATOM   1413  OG1ATHR B  63     -30.205  17.925  27.129  0.54 16.03           O  
ANISOU 1413  OG1ATHR B  63     2512   1718   1861   -368    645   -201       O  
ATOM   1414  OG1BTHR B  63     -30.915  15.849  27.467  0.46 18.95           O  
ANISOU 1414  OG1BTHR B  63     2929   2087   2184   -412    648   -153       O  
ATOM   1415  N   LEU B  64     -30.856  17.298  23.190  1.00 15.91           N  
ANISOU 1415  N   LEU B  64     2247   1724   2074   -225    518   -127       N  
ATOM   1416  CA  LEU B  64     -31.005  18.295  22.140  1.00 14.26           C  
ANISOU 1416  CA  LEU B  64     1967   1510   1940   -185    500   -125       C  
ATOM   1417  C   LEU B  64     -32.465  18.702  22.073  1.00 16.60           C  
ANISOU 1417  C   LEU B  64     2196   1779   2331   -180    561   -144       C  
ATOM   1418  O   LEU B  64     -33.350  17.855  21.881  1.00 17.60           O  
ANISOU 1418  O   LEU B  64     2290   1905   2490   -188    573   -139       O  
ATOM   1419  CB  LEU B  64     -30.591  17.750  20.770  1.00 15.63           C  
ANISOU 1419  CB  LEU B  64     2107   1708   2124   -159    421    -89       C  
ATOM   1420  CG  LEU B  64     -31.001  18.634  19.574  1.00 14.29           C  
ANISOU 1420  CG  LEU B  64     1872   1533   2024   -129    396    -73       C  
ATOM   1421  CD1 LEU B  64     -30.269  19.978  19.557  1.00 12.61           C  
ANISOU 1421  CD1 LEU B  64     1668   1308   1816   -117    394    -77       C  
ATOM   1422  CD2 LEU B  64     -30.806  17.909  18.250  1.00 13.44           C  
ANISOU 1422  CD2 LEU B  64     1745   1454   1910   -122    329    -44       C  
ATOM   1423  N   GLU B  65     -32.719  19.993  22.237  1.00 19.17           N  
ANISOU 1423  N   GLU B  65     2493   2075   2715   -168    600   -169       N  
ATOM   1424  CA  GLU B  65     -34.057  20.520  22.030  1.00 23.28           C  
ANISOU 1424  CA  GLU B  65     2928   2557   3361   -152    646   -188       C  
ATOM   1425  C   GLU B  65     -34.144  21.375  20.779  1.00 20.83           C  
ANISOU 1425  C   GLU B  65     2549   2230   3134   -107    577   -152       C  
ATOM   1426  O   GLU B  65     -33.278  22.220  20.525  1.00 13.10           O  
ANISOU 1426  O   GLU B  65     1592   1249   2135    -93    546   -140       O  
ATOM   1427  CB  GLU B  65     -34.555  21.325  23.225  1.00 27.69           C  
ANISOU 1427  CB  GLU B  65     3492   3076   3954   -177    758   -253       C  
ATOM   1428  CG  GLU B  65     -35.860  22.037  22.887  1.00 35.71           C  
ANISOU 1428  CG  GLU B  65     4396   4037   5136   -150    798   -276       C  
ATOM   1429  CD  GLU B  65     -36.698  22.381  24.097  1.00 45.42           C  
ANISOU 1429  CD  GLU B  65     5616   5226   6417   -187    939   -358       C  
ATOM   1430  OE1 GLU B  65     -36.208  23.119  24.977  1.00 49.51           O  
ANISOU 1430  OE1 GLU B  65     6190   5730   6891   -211   1001   -405       O  
ATOM   1431  OE2 GLU B  65     -37.856  21.918  24.159  1.00 47.83           O1-
ANISOU 1431  OE2 GLU B  65     5855   5509   6809   -196    992   -381       O1-
ATOM   1432  N   ILE B  66     -35.204  21.143  20.007  1.00 19.81           N  
ANISOU 1432  N   ILE B  66     2340   2087   3098    -89    549   -133       N  
ATOM   1433  CA  ILE B  66     -35.490  21.927  18.819  1.00 17.81           C  
ANISOU 1433  CA  ILE B  66     2025   1812   2931    -52    472    -90       C  
ATOM   1434  C   ILE B  66     -36.840  22.627  19.012  1.00 19.46           C  
ANISOU 1434  C   ILE B  66     2133   1954   3307    -32    514   -117       C  
ATOM   1435  O   ILE B  66     -37.870  21.971  19.168  1.00 16.31           O  
ANISOU 1435  O   ILE B  66     1678   1545   2972    -41    543   -138       O  
ATOM   1436  CB  ILE B  66     -35.534  21.030  17.566  1.00 16.13           C  
ANISOU 1436  CB  ILE B  66     1802   1638   2687    -51    374    -38       C  
ATOM   1437  CG1 ILE B  66     -34.257  20.189  17.476  1.00 19.45           C  
ANISOU 1437  CG1 ILE B  66     2309   2116   2964    -72    352    -28       C  
ATOM   1438  CG2 ILE B  66     -35.677  21.869  16.327  1.00 15.87           C  
ANISOU 1438  CG2 ILE B  66     1732   1587   2711    -25    282     17       C  
ATOM   1439  CD1 ILE B  66     -34.453  18.850  16.832  1.00 16.16           C  
ANISOU 1439  CD1 ILE B  66     1891   1736   2511    -87    308    -14       C  
ATOM   1440  N   LEU B  67     -36.836  23.955  19.020  1.00 18.05           N  
ANISOU 1440  N   LEU B  67     1925   1722   3211     -7    520   -120       N  
ATOM   1441  CA  LEU B  67     -38.070  24.693  19.252  1.00 16.52           C  
ANISOU 1441  CA  LEU B  67     1624   1450   3201     16    565   -154       C  
ATOM   1442  C   LEU B  67     -38.822  24.975  17.954  1.00 18.68           C  
ANISOU 1442  C   LEU B  67     1810   1692   3598     53    445    -88       C  
ATOM   1443  O   LEU B  67     -38.214  25.250  16.919  1.00 20.71           O  
ANISOU 1443  O   LEU B  67     2100   1967   3804     65    337    -15       O  
ATOM   1444  CB  LEU B  67     -37.796  26.009  19.985  1.00 17.52           C  
ANISOU 1444  CB  LEU B  67     1753   1520   3383     24    638   -201       C  
ATOM   1445  CG  LEU B  67     -37.133  25.989  21.360  1.00 21.08           C  
ANISOU 1445  CG  LEU B  67     2291   1991   3726    -20    755   -274       C  
ATOM   1446  CD1 LEU B  67     -37.173  27.394  21.977  1.00 20.62           C  
ANISOU 1446  CD1 LEU B  67     2209   1859   3766    -10    830   -332       C  
ATOM   1447  CD2 LEU B  67     -37.839  25.006  22.257  1.00 23.00           C  
ANISOU 1447  CD2 LEU B  67     2538   2251   3951    -61    853   -331       C  
ATOM   1448  N   ASP B  68     -40.146  24.914  18.028  1.00 20.93           N  
ANISOU 1448  N   ASP B  68     1983   1926   4044     67    465   -115       N  
ATOM   1449  CA  ASP B  68     -41.009  25.416  16.964  1.00 20.83           C  
ANISOU 1449  CA  ASP B  68     1867   1858   4190    106    348    -58       C  
ATOM   1450  C   ASP B  68     -40.646  24.754  15.645  1.00 20.19           C  
ANISOU 1450  C   ASP B  68     1832   1840   3999     98    202     30       C  
ATOM   1451  O   ASP B  68     -40.281  25.427  14.684  1.00 17.58           O  
ANISOU 1451  O   ASP B  68     1521   1497   3660    114     91    106       O  
ATOM   1452  CB  ASP B  68     -40.859  26.935  16.853  1.00 21.84           C  
ANISOU 1452  CB  ASP B  68     1966   1906   4424    143    329    -41       C  
ATOM   1453  CG  ASP B  68     -41.957  27.578  16.033  1.00 23.35           C  
ANISOU 1453  CG  ASP B  68     2030   2012   4829    188    222      7       C  
ATOM   1454  OD1 ASP B  68     -42.718  26.855  15.365  1.00 23.29           O  
ANISOU 1454  OD1 ASP B  68     1966   2018   4864    187    138     39       O  
ATOM   1455  OD2 ASP B  68     -42.052  28.820  16.051  1.00 22.04           O1-
ANISOU 1455  OD2 ASP B  68     1820   1760   4796    222    215     14       O1-
ATOM   1456  N   CYS B  69     -40.767  23.430  15.606  1.00 22.04           N  
ANISOU 1456  N   CYS B  69     2088   2137   4150     67    206     19       N  
ATOM   1457  CA  CYS B  69     -40.334  22.644  14.454  1.00 19.30           C  
ANISOU 1457  CA  CYS B  69     1798   1857   3679     48     91     82       C  
ATOM   1458  C   CYS B  69     -41.123  22.953  13.182  1.00 20.12           C  
ANISOU 1458  C   CYS B  69     1833   1930   3880     64    -61    154       C  
ATOM   1459  O   CYS B  69     -42.356  22.986  13.182  1.00 23.02           O  
ANISOU 1459  O   CYS B  69     2084   2245   4418     83    -83    141       O  
ATOM   1460  CB  CYS B  69     -40.415  21.148  14.770  1.00 15.15           C  
ANISOU 1460  CB  CYS B  69     1297   1389   3070     11    136     45       C  
ATOM   1461  SG  CYS B  69     -39.319  20.625  16.111  1.00 20.12           S  
ANISOU 1461  SG  CYS B  69     2033   2061   3551    -18    275    -14       S  
ATOM   1462  N   HIS B  70     -40.392  23.181  12.100  1.00 18.53           N  
ANISOU 1462  N   HIS B  70     1708   1762   3572     53   -168    228       N  
ATOM   1463  CA  HIS B  70     -40.988  23.394  10.789  1.00 22.73           C  
ANISOU 1463  CA  HIS B  70     2209   2278   4150     53   -332    309       C  
ATOM   1464  C   HIS B  70     -40.445  22.341   9.842  1.00 20.12           C  
ANISOU 1464  C   HIS B  70     1969   2036   3640      2   -397    336       C  
ATOM   1465  O   HIS B  70     -39.597  21.541  10.239  1.00 16.29           O  
ANISOU 1465  O   HIS B  70     1556   1612   3020    -24   -312    291       O  
ATOM   1466  CB  HIS B  70     -40.704  24.812  10.294  1.00 30.36           C  
ANISOU 1466  CB  HIS B  70     3189   3185   5160     75   -404    380       C  
ATOM   1467  CG  HIS B  70     -41.507  25.852  11.010  1.00 40.74           C  
ANISOU 1467  CG  HIS B  70     4389   4394   6696    128   -367    357       C  
ATOM   1468  CD2 HIS B  70     -41.158  26.754  11.962  1.00 45.67           C  
ANISOU 1468  CD2 HIS B  70     5006   4968   7380    154   -257    312       C  
ATOM   1469  ND1 HIS B  70     -42.861  26.019  10.806  1.00 45.23           N  
ANISOU 1469  ND1 HIS B  70     4824   4892   7471    158   -440    367       N  
ATOM   1470  CE1 HIS B  70     -43.308  26.988  11.586  1.00 50.11           C  
ANISOU 1470  CE1 HIS B  70     5352   5415   8273    202   -371    328       C  
ATOM   1471  NE2 HIS B  70     -42.292  27.450  12.295  1.00 50.73           N  
ANISOU 1471  NE2 HIS B  70     5510   5506   8260    198   -257    293       N  
ATOM   1472  N   THR B  71     -40.942  22.315   8.609  1.00 21.78           N  
ANISOU 1472  N   THR B  71     2478   2619   3176   -235   -622    316       N  
ATOM   1473  CA  THR B  71     -40.608  21.215   7.696  1.00 26.14           C  
ANISOU 1473  CA  THR B  71     3080   3342   3511   -158   -605    288       C  
ATOM   1474  C   THR B  71     -39.108  21.083   7.448  1.00 28.24           C  
ANISOU 1474  C   THR B  71     3364   3758   3608   -133   -537    423       C  
ATOM   1475  O   THR B  71     -38.582  19.973   7.363  1.00 28.61           O  
ANISOU 1475  O   THR B  71     3464   3895   3512    -85   -480    340       O  
ATOM   1476  CB  THR B  71     -41.354  21.329   6.369  1.00 29.08           C  
ANISOU 1476  CB  THR B  71     3428   3810   3813    -90   -721    309       C  
ATOM   1477  CG2 THR B  71     -40.858  20.284   5.390  1.00 28.01           C  
ANISOU 1477  CG2 THR B  71     3336   3879   3426     18   -718    273       C  
ATOM   1478  OG1 THR B  71     -42.749  21.114   6.603  1.00 35.37           O  
ANISOU 1478  OG1 THR B  71     4209   4465   4764   -104   -778    141       O  
ATOM   1479  N   ASP B  72     -38.426  22.220   7.357  1.00 26.90           N  
ANISOU 1479  N   ASP B  72     3136   3602   3484   -167   -552    632       N  
ATOM   1480  CA  ASP B  72     -36.984  22.241   7.162  1.00 28.02           C  
ANISOU 1480  CA  ASP B  72     3266   3874   3507   -154   -485    789       C  
ATOM   1481  C   ASP B  72     -36.203  21.607   8.327  1.00 26.85           C  
ANISOU 1481  C   ASP B  72     3171   3652   3379   -185   -389    688       C  
ATOM   1482  O   ASP B  72     -35.010  21.321   8.184  1.00 25.54           O  
ANISOU 1482  O   ASP B  72     3004   3599   3100   -162   -325    771       O  
ATOM   1483  CB  ASP B  72     -36.499  23.678   6.918  1.00 28.57           C  
ANISOU 1483  CB  ASP B  72     3236   3928   3693   -201   -537   1052       C  
ATOM   1484  N   ASP B  73     -36.860  21.399   9.472  1.00 19.23           N  
ANISOU 1484  N   ASP B  73     2244   2511   2551   -230   -376    519       N  
ATOM   1485  CA  ASP B  73     -36.200  20.789  10.639  1.00 17.36           C  
ANISOU 1485  CA  ASP B  73     2066   2208   2324   -252   -292    427       C  
ATOM   1486  C   ASP B  73     -36.178  19.256  10.575  1.00 18.72           C  
ANISOU 1486  C   ASP B  73     2312   2444   2357   -207   -234    282       C  
ATOM   1487  O   ASP B  73     -35.503  18.605  11.379  1.00 18.42           O  
ANISOU 1487  O   ASP B  73     2324   2377   2298   -215   -168    226       O  
ATOM   1488  CB  ASP B  73     -36.853  21.234  11.951  1.00 17.07           C  
ANISOU 1488  CB  ASP B  73     2033   1984   2469   -304   -294    324       C  
ATOM   1489  CG  ASP B  73     -36.716  22.735  12.191  1.00 19.06           C  
ANISOU 1489  CG  ASP B  73     2206   2142   2893   -340   -374    437       C  
ATOM   1490  OD1 ASP B  73     -35.639  23.283  11.875  1.00 15.97           O  
ANISOU 1490  OD1 ASP B  73     1771   1794   2504   -347   -392    602       O  
ATOM   1491  OD2 ASP B  73     -37.686  23.368  12.671  1.00 17.40           O1-
ANISOU 1491  OD2 ASP B  73     1965   1813   2836   -359   -426    362       O1-
ATOM   1492  N   SER B  74     -36.933  18.683   9.637  1.00 15.35           N  
ANISOU 1492  N   SER B  74     1886   2091   1854   -153   -278    214       N  
ATOM   1493  CA  SER B  74     -36.919  17.235   9.430  1.00 18.16           C  
ANISOU 1493  CA  SER B  74     2295   2498   2108    -97   -261     67       C  
ATOM   1494  C   SER B  74     -35.541  16.752   9.006  1.00 18.23           C  
ANISOU 1494  C   SER B  74     2319   2665   1945    -39   -217    120       C  
ATOM   1495  O   SER B  74     -34.717  17.530   8.534  1.00 21.28           O  
ANISOU 1495  O   SER B  74     2661   3162   2263    -28   -205    290       O  
ATOM   1496  CB  SER B  74     -37.958  16.836   8.375  1.00 19.00           C  
ANISOU 1496  CB  SER B  74     2385   2656   2177    -32   -352    -23       C  
ATOM   1497  OG  SER B  74     -39.248  17.264   8.776  1.00 19.40           O  
ANISOU 1497  OG  SER B  74     2409   2555   2407    -87   -391    -75       O  
ATOM   1498  N   GLY B  75     -35.287  15.460   9.173  1.00 18.05           N  
ANISOU 1498  N   GLY B  75     2343   2646   1869      0   -198    -19       N  
ATOM   1499  CA  GLY B  75     -34.048  14.884   8.702  1.00 16.92           C  
ANISOU 1499  CA  GLY B  75     2207   2661   1563     74   -167     -5       C  
ATOM   1500  C   GLY B  75     -33.267  14.265   9.837  1.00 16.84           C  
ANISOU 1500  C   GLY B  75     2244   2550   1603     32   -103    -49       C  
ATOM   1501  O   GLY B  75     -33.826  13.939  10.883  1.00 16.00           O  
ANISOU 1501  O   GLY B  75     2177   2272   1631    -33    -89   -124       O  
ATOM   1502  N   THR B  76     -31.960  14.122   9.652  1.00 14.04           N  
ANISOU 1502  N   THR B  76     1881   2313   1142     73    -60     10       N  
ATOM   1503  CA  THR B  76     -31.164  13.431  10.656  1.00 14.68           C  
ANISOU 1503  CA  THR B  76     2010   2305   1263     47    -16    -43       C  
ATOM   1504  C   THR B  76     -30.545  14.378  11.659  1.00 12.03           C  
ANISOU 1504  C   THR B  76     1672   1875   1022    -36     30     82       C  
ATOM   1505  O   THR B  76     -30.095  15.462  11.301  1.00 12.29           O  
ANISOU 1505  O   THR B  76     1642   1973   1056    -48     36    239       O  
ATOM   1506  CB  THR B  76     -30.055  12.574  10.018  1.00 14.94           C  
ANISOU 1506  CB  THR B  76     2032   2496   1149    147     -7    -89       C  
ATOM   1507  CG2 THR B  76     -30.672  11.507   9.155  1.00 16.62           C  
ANISOU 1507  CG2 THR B  76     2250   2776   1288    247    -83   -264       C  
ATOM   1508  OG1 THR B  76     -29.226  13.406   9.197  1.00 16.84           O  
ANISOU 1508  OG1 THR B  76     2198   2927   1274    187     30     76       O  
ATOM   1509  N   TYR B  77     -30.502  13.951  12.917  1.00  9.32           N  
ANISOU 1509  N   TYR B  77     1393   1381    769    -85     51     16       N  
ATOM   1510  CA  TYR B  77     -29.754  14.663  13.937  1.00 11.35           C  
ANISOU 1510  CA  TYR B  77     1658   1554   1101   -136     75     94       C  
ATOM   1511  C   TYR B  77     -28.702  13.712  14.513  1.00 14.19           C  
ANISOU 1511  C   TYR B  77     2066   1898   1427   -115     97     40       C  
ATOM   1512  O   TYR B  77     -29.017  12.583  14.882  1.00 15.31           O  
ANISOU 1512  O   TYR B  77     2267   1984   1567   -106     95    -73       O  
ATOM   1513  CB  TYR B  77     -30.694  15.212  15.022  1.00  8.29           C  
ANISOU 1513  CB  TYR B  77     1301   1014    837   -199     73     66       C  
ATOM   1514  CG  TYR B  77     -31.503  16.391  14.519  1.00 11.63           C  
ANISOU 1514  CG  TYR B  77     1659   1438   1323   -221     36    135       C  
ATOM   1515  CD1 TYR B  77     -31.021  17.699  14.639  1.00 10.96           C  
ANISOU 1515  CD1 TYR B  77     1515   1327   1323   -246      4    255       C  
ATOM   1516  CD2 TYR B  77     -32.720  16.197  13.879  1.00 15.61           C  
ANISOU 1516  CD2 TYR B  77     2150   1956   1826   -214     15     82       C  
ATOM   1517  CE1 TYR B  77     -31.744  18.775  14.159  1.00 14.08           C  
ANISOU 1517  CE1 TYR B  77     1843   1709   1800   -267    -47    325       C  
ATOM   1518  CE2 TYR B  77     -33.457  17.270  13.402  1.00 17.16           C  
ANISOU 1518  CE2 TYR B  77     2285   2147   2088   -231    -32    146       C  
ATOM   1519  CZ  TYR B  77     -32.957  18.555  13.540  1.00 16.89           C  
ANISOU 1519  CZ  TYR B  77     2195   2086   2135   -259    -62    272       C  
ATOM   1520  OH  TYR B  77     -33.669  19.625  13.052  1.00 17.17           O  
ANISOU 1520  OH  TYR B  77     2163   2103   2258   -277   -125    344       O  
ATOM   1521  N   ARG B  78     -27.451  14.154  14.547  1.00  9.63           N  
ANISOU 1521  N   ARG B  78     1453   1363    844   -107    107    129       N  
ATOM   1522  CA  ARG B  78     -26.361  13.262  14.941  1.00 12.68           C  
ANISOU 1522  CA  ARG B  78     1873   1747   1198    -76    118     79       C  
ATOM   1523  C   ARG B  78     -25.490  13.861  16.031  1.00 13.10           C  
ANISOU 1523  C   ARG B  78     1938   1697   1343   -112    109    132       C  
ATOM   1524  O   ARG B  78     -25.048  15.012  15.919  1.00 12.51           O  
ANISOU 1524  O   ARG B  78     1789   1628   1337   -133     96    253       O  
ATOM   1525  CB  ARG B  78     -25.499  12.892  13.713  1.00 12.35           C  
ANISOU 1525  CB  ARG B  78     1759   1896   1039      3    134    103       C  
ATOM   1526  CG  ARG B  78     -24.359  11.915  14.034  1.00 11.54           C  
ANISOU 1526  CG  ARG B  78     1677   1795    911     46    136     32       C  
ATOM   1527  CD  ARG B  78     -23.644  11.425  12.765  1.00 15.35           C  
ANISOU 1527  CD  ARG B  78     2082   2494   1257    150    157     20       C  
ATOM   1528  NE  ARG B  78     -23.516  12.497  11.784  1.00 18.51           N  
ANISOU 1528  NE  ARG B  78     2376   3058   1597    164    197    186       N  
ATOM   1529  CZ  ARG B  78     -22.396  13.154  11.490  1.00 25.64           C  
ANISOU 1529  CZ  ARG B  78     3178   4063   2503    172    243    341       C  
ATOM   1530  NH1 ARG B  78     -21.255  12.837  12.077  1.00 19.99           N1+
ANISOU 1530  NH1 ARG B  78     2453   3301   1843    175    251    329       N1+
ATOM   1531  NH2 ARG B  78     -22.422  14.122  10.570  1.00 27.32           N  
ANISOU 1531  NH2 ARG B  78     3287   4424   2670    179    280    524       N  
ATOM   1532  N   ALA B  79     -25.245  13.084  17.087  1.00  9.42           N  
ANISOU 1532  N   ALA B  79     1559   1129    891   -115    102     47       N  
ATOM   1533  CA  ALA B  79     -24.277  13.483  18.100  1.00 11.29           C  
ANISOU 1533  CA  ALA B  79     1815   1279   1195   -125     75     73       C  
ATOM   1534  C   ALA B  79     -22.965  12.736  17.876  1.00 12.36           C  
ANISOU 1534  C   ALA B  79     1933   1465   1298    -81     73     61       C  
ATOM   1535  O   ALA B  79     -22.942  11.506  17.747  1.00 13.14           O  
ANISOU 1535  O   ALA B  79     2075   1580   1336    -48     77    -29       O  
ATOM   1536  CB  ALA B  79     -24.812  13.238  19.513  1.00  7.54           C  
ANISOU 1536  CB  ALA B  79     1448    675    743   -144     65      1       C  
ATOM   1537  N   VAL B  80     -21.878  13.490  17.797  1.00 12.37           N  
ANISOU 1537  N   VAL B  80     1855   1482   1364    -78     57    152       N  
ATOM   1538  CA  VAL B  80     -20.553  12.907  17.672  1.00 11.93           C  
ANISOU 1538  CA  VAL B  80     1765   1466   1301    -36     55    146       C  
ATOM   1539  C   VAL B  80     -19.767  13.167  18.952  1.00 14.55           C  
ANISOU 1539  C   VAL B  80     2139   1649   1739    -48    -10    133       C  
ATOM   1540  O   VAL B  80     -19.546  14.315  19.346  1.00 11.29           O  
ANISOU 1540  O   VAL B  80     1679   1165   1444    -75    -55    204       O  
ATOM   1541  CB  VAL B  80     -19.796  13.482  16.478  1.00  9.01           C  
ANISOU 1541  CB  VAL B  80     1243   1253    927    -13     96    278       C  
ATOM   1542  CG1 VAL B  80     -18.392  12.896  16.405  1.00 10.42           C  
ANISOU 1542  CG1 VAL B  80     1370   1477   1111     36    101    266       C  
ATOM   1543  CG2 VAL B  80     -20.576  13.209  15.180  1.00 12.27           C  
ANISOU 1543  CG2 VAL B  80     1622   1841   1200     23    150    280       C  
ATOM   1544  N   CYS B  81     -19.345  12.090  19.596  1.00 12.06           N  
ANISOU 1544  N   CYS B  81     1909   1279   1393    -21    -34     35       N  
ATOM   1545  CA  CYS B  81     -18.666  12.187  20.877  1.00 13.59           C  
ANISOU 1545  CA  CYS B  81     2166   1337   1660    -16   -108      5       C  
ATOM   1546  C   CYS B  81     -17.229  11.723  20.736  1.00 14.65           C  
ANISOU 1546  C   CYS B  81     2245   1484   1837     22   -135      0       C  
ATOM   1547  O   CYS B  81     -16.971  10.597  20.313  1.00 14.95           O  
ANISOU 1547  O   CYS B  81     2293   1577   1809     58   -115    -63       O  
ATOM   1548  CB  CYS B  81     -19.377  11.331  21.917  1.00 11.31           C  
ANISOU 1548  CB  CYS B  81     2028    964   1305    -16   -122    -84       C  
ATOM   1549  SG  CYS B  81     -21.143  11.649  22.049  1.00 16.07           S  
ANISOU 1549  SG  CYS B  81     2682   1569   1856    -55    -69    -86       S  
ATOM   1550  N  ATHR B  82     -16.284  12.584  21.089  0.37 12.88           N  
ANISOU 1550  N  ATHR B  82     1951   1198   1746     21   -194     56       N  
ATOM   1551  N  BTHR B  82     -16.293  12.586  21.114  0.63 12.65           N  
ANISOU 1551  N  BTHR B  82     1924   1165   1716     21   -195     55       N  
ATOM   1552  CA ATHR B  82     -14.880  12.237  20.916  0.37 13.21           C  
ANISOU 1552  CA ATHR B  82     1914   1251   1854     56   -217     62       C  
ATOM   1553  CA BTHR B  82     -14.878  12.299  20.901  0.63 13.40           C  
ANISOU 1553  CA BTHR B  82     1932   1275   1882     54   -217     67       C  
ATOM   1554  C  ATHR B  82     -14.068  12.463  22.179  0.37 13.54           C  
ANISOU 1554  C  ATHR B  82     2002   1128   2013     70   -338     19       C  
ATOM   1555  C  BTHR B  82     -14.060  12.476  22.177  0.63 13.51           C  
ANISOU 1555  C  BTHR B  82     1997   1124   2011     70   -339     20       C  
ATOM   1556  O  ATHR B  82     -14.282  13.430  22.905  0.37 14.37           O  
ANISOU 1556  O  ATHR B  82     2124   1131   2204     56   -410     30       O  
ATOM   1557  O  BTHR B  82     -14.263  13.434  22.916  0.63 14.64           O  
ANISOU 1557  O  BTHR B  82     2159   1164   2241     56   -412     30       O  
ATOM   1558  CB ATHR B  82     -14.238  13.072  19.793  0.37 15.62           C  
ANISOU 1558  CB ATHR B  82     2023   1672   2241     47   -164    209       C  
ATOM   1559  CB BTHR B  82     -14.301  13.257  19.832  0.63 16.17           C  
ANISOU 1559  CB BTHR B  82     2088   1731   2326     40   -169    222       C  
ATOM   1560  CG2ATHR B  82     -15.057  12.969  18.510  0.37 17.07           C  
ANISOU 1560  CG2ATHR B  82     2159   2040   2285     49    -54    259       C  
ATOM   1561  CG2BTHR B  82     -12.874  12.890  19.493  0.63 13.71           C  
ANISOU 1561  CG2BTHR B  82     1662   1466   2081     80   -165    243       C  
ATOM   1562  OG1ATHR B  82     -14.170  14.442  20.205  0.37 14.56           O  
ANISOU 1562  OG1ATHR B  82     1824   1431   2275      5   -230    303       O  
ATOM   1563  OG1BTHR B  82     -15.121  13.225  18.649  0.63 17.32           O  
ANISOU 1563  OG1BTHR B  82     2192   2045   2345     37    -66    274       O  
ATOM   1564  N   ASN B  83     -13.133  11.558  22.434  1.00 12.62           N  
ANISOU 1564  N   ASN B  83     1905    986   1906    111   -376    -46       N  
ATOM   1565  CA  ASN B  83     -12.074  11.806  23.401  1.00 16.36           C  
ANISOU 1565  CA  ASN B  83     2382   1319   2514    137   -501    -76       C  
ATOM   1566  C   ASN B  83     -10.774  11.283  22.773  1.00 17.92           C  
ANISOU 1566  C   ASN B  83     2456   1569   2786    169   -490    -67       C  
ATOM   1567  O   ASN B  83     -10.785  10.844  21.625  1.00 16.79           O  
ANISOU 1567  O   ASN B  83     2226   1583   2569    179   -382    -39       O  
ATOM   1568  CB  ASN B  83     -12.384  11.246  24.805  1.00 16.64           C  
ANISOU 1568  CB  ASN B  83     2611   1233   2477    166   -592   -183       C  
ATOM   1569  CG  ASN B  83     -12.238   9.731  24.897  1.00 14.25           C  
ANISOU 1569  CG  ASN B  83     2398    940   2079    194   -585   -255       C  
ATOM   1570  ND2 ASN B  83     -12.605   9.169  26.055  1.00 12.62           N  
ANISOU 1570  ND2 ASN B  83     2356    648   1793    213   -647   -310       N  
ATOM   1571  OD1 ASN B  83     -11.796   9.079  23.956  1.00 14.71           O  
ANISOU 1571  OD1 ASN B  83     2370   1082   2136    205   -532   -261       O  
ATOM   1572  N   TYR B  84      -9.658  11.331  23.485  1.00 16.47           N  
ANISOU 1572  N   TYR B  84     2252   1265   2742    198   -604   -100       N  
ATOM   1573  CA  TYR B  84      -8.392  10.999  22.834  1.00 16.16           C  
ANISOU 1573  CA  TYR B  84     2058   1280   2801    228   -586    -78       C  
ATOM   1574  C   TYR B  84      -8.295   9.528  22.435  1.00 19.48           C  
ANISOU 1574  C   TYR B  84     2526   1785   3091    276   -541   -180       C  
ATOM   1575  O   TYR B  84      -7.488   9.179  21.573  1.00 21.85           O  
ANISOU 1575  O   TYR B  84     2683   2200   3421    313   -483   -171       O  
ATOM   1576  CB  TYR B  84      -7.195  11.415  23.688  1.00 15.92           C  
ANISOU 1576  CB  TYR B  84     1981   1084   2984    249   -735    -96       C  
ATOM   1577  CG  TYR B  84      -6.844  10.469  24.819  1.00 17.87           C  
ANISOU 1577  CG  TYR B  84     2391   1201   3199    300   -862   -239       C  
ATOM   1578  CD1 TYR B  84      -5.854   9.499  24.660  1.00 21.30           C  
ANISOU 1578  CD1 TYR B  84     2782   1639   3671    346   -884   -303       C  
ATOM   1579  CD2 TYR B  84      -7.466  10.570  26.057  1.00 17.24           C  
ANISOU 1579  CD2 TYR B  84     2498   1002   3051    312   -966   -306       C  
ATOM   1580  CE1 TYR B  84      -5.509   8.633  25.700  1.00 21.94           C  
ANISOU 1580  CE1 TYR B  84     3010   1590   3735    392  -1016   -418       C  
ATOM   1581  CE2 TYR B  84      -7.134   9.715  27.100  1.00 18.09           C  
ANISOU 1581  CE2 TYR B  84     2753   1005   3114    364  -1083   -409       C  
ATOM   1582  CZ  TYR B  84      -6.154   8.751  26.918  1.00 23.71           C  
ANISOU 1582  CZ  TYR B  84     3426   1703   3880    399  -1114   -459       C  
ATOM   1583  OH  TYR B  84      -5.826   7.914  27.959  1.00 24.68           O  
ANISOU 1583  OH  TYR B  84     3695   1713   3969    449  -1244   -546       O  
ATOM   1584  N   LYS B  85      -9.115   8.674  23.054  1.00 17.08           N  
ANISOU 1584  N   LYS B  85     2407   1425   2656    280   -572   -274       N  
ATOM   1585  CA  LYS B  85      -9.089   7.233  22.770  1.00 20.66           C  
ANISOU 1585  CA  LYS B  85     2908   1916   3026    324   -567   -379       C  
ATOM   1586  C   LYS B  85      -9.956   6.840  21.560  1.00 19.99           C  
ANISOU 1586  C   LYS B  85     2785   2005   2806    329   -444   -385       C  
ATOM   1587  O   LYS B  85      -9.743   5.807  20.941  1.00 20.76           O  
ANISOU 1587  O   LYS B  85     2851   2174   2863    385   -435   -478       O  
ATOM   1588  CB  LYS B  85      -9.500   6.423  24.004  1.00 22.40           C  
ANISOU 1588  CB  LYS B  85     3326   1983   3200    325   -669   -451       C  
ATOM   1589  CG  LYS B  85      -8.642   6.705  25.229  1.00 27.87           C  
ANISOU 1589  CG  LYS B  85     4076   2518   3997    345   -810   -466       C  
ATOM   1590  CD  LYS B  85      -8.050   5.453  25.822  1.00 34.41           C  
ANISOU 1590  CD  LYS B  85     4985   3246   4843    390   -918   -554       C  
ATOM   1591  CE  LYS B  85      -7.097   4.778  24.853  1.00 37.85           C  
ANISOU 1591  CE  LYS B  85     5273   3751   5356    436   -901   -616       C  
ATOM   1592  NZ  LYS B  85      -6.384   3.648  25.506  1.00 37.04           N1+
ANISOU 1592  NZ  LYS B  85     5238   3522   5314    484  -1037   -707       N1+
ATOM   1593  N   GLY B  86     -10.930   7.667  21.212  1.00 13.06           N  
ANISOU 1593  N   GLY B  86     1905   1192   1867    280   -368   -301       N  
ATOM   1594  CA  GLY B  86     -11.703   7.379  20.023  1.00 15.22           C  
ANISOU 1594  CA  GLY B  86     2133   1634   2015    295   -267   -309       C  
ATOM   1595  C   GLY B  86     -12.953   8.215  19.943  1.00 18.83           C  
ANISOU 1595  C   GLY B  86     2630   2110   2414    234   -213   -229       C  
ATOM   1596  O   GLY B  86     -13.067   9.253  20.592  1.00 13.98           O  
ANISOU 1596  O   GLY B  86     2032   1410   1870    184   -238   -150       O  
ATOM   1597  N   GLU B  87     -13.900   7.732  19.151  1.00 18.05           N  
ANISOU 1597  N   GLU B  87     2544   2116   2199    247   -157   -268       N  
ATOM   1598  CA  GLU B  87     -15.081   8.488  18.802  1.00 15.94           C  
ANISOU 1598  CA  GLU B  87     2287   1897   1874    199    -98   -197       C  
ATOM   1599  C   GLU B  87     -16.261   7.520  18.803  1.00 15.80           C  
ANISOU 1599  C   GLU B  87     2374   1852   1779    198   -107   -295       C  
ATOM   1600  O   GLU B  87     -16.102   6.335  18.498  1.00 16.74           O  
ANISOU 1600  O   GLU B  87     2501   1985   1876    254   -140   -409       O  
ATOM   1601  CB  GLU B  87     -14.857   9.100  17.413  1.00 22.67           C  
ANISOU 1601  CB  GLU B  87     2979   2961   2674    230     -7   -107       C  
ATOM   1602  CG  GLU B  87     -16.010   9.888  16.819  1.00 24.04           C  
ANISOU 1602  CG  GLU B  87     3140   3210   2784    192     50    -24       C  
ATOM   1603  CD  GLU B  87     -16.919   9.019  15.955  1.00 27.88           C  
ANISOU 1603  CD  GLU B  87     3653   3807   3131    243     73   -128       C  
ATOM   1604  OE1 GLU B  87     -16.666   7.809  15.839  1.00 28.79           O  
ANISOU 1604  OE1 GLU B  87     3794   3931   3214    307     37   -270       O  
ATOM   1605  OE2 GLU B  87     -17.885   9.549  15.391  1.00 33.37           O1-
ANISOU 1605  OE2 GLU B  87     4339   4571   3769    223    109    -77       O1-
ATOM   1606  N   ALA B  88     -17.433   8.021  19.172  1.00 11.42           N  
ANISOU 1606  N   ALA B  88     1887   1245   1208    138    -90   -254       N  
ATOM   1607  CA  ALA B  88     -18.676   7.264  19.054  1.00 15.09           C  
ANISOU 1607  CA  ALA B  88     2420   1690   1625    128    -88   -320       C  
ATOM   1608  C   ALA B  88     -19.743   8.227  18.560  1.00 14.18           C  
ANISOU 1608  C   ALA B  88     2278   1639   1473     89    -29   -250       C  
ATOM   1609  O   ALA B  88     -19.736   9.417  18.929  1.00 10.89           O  
ANISOU 1609  O   ALA B  88     1846   1201   1093     47    -13   -155       O  
ATOM   1610  CB  ALA B  88     -19.075   6.669  20.393  1.00 16.33           C  
ANISOU 1610  CB  ALA B  88     2707   1675   1821     90   -136   -339       C  
ATOM   1611  N   SER B  89     -20.661   7.732  17.737  1.00 13.48           N  
ANISOU 1611  N   SER B  89     2176   1615   1330    107    -15   -306       N  
ATOM   1612  CA  SER B  89     -21.704   8.601  17.216  1.00 12.66           C  
ANISOU 1612  CA  SER B  89     2045   1571   1195     75     30   -246       C  
ATOM   1613  C   SER B  89     -23.049   7.904  17.107  1.00 14.77           C  
ANISOU 1613  C   SER B  89     2358   1792   1462     62     15   -320       C  
ATOM   1614  O   SER B  89     -23.131   6.676  17.060  1.00 13.55           O  
ANISOU 1614  O   SER B  89     2227   1593   1327     94    -34   -424       O  
ATOM   1615  CB  SER B  89     -21.282   9.241  15.882  1.00 10.39           C  
ANISOU 1615  CB  SER B  89     1635   1480    833    124     72   -185       C  
ATOM   1616  OG  SER B  89     -21.547   8.411  14.779  1.00 18.77           O  
ANISOU 1616  OG  SER B  89     2661   2670   1802    206     64   -287       O  
ATOM   1617  N   ASP B  90     -24.101   8.708  17.074  1.00 10.86           N  
ANISOU 1617  N   ASP B  90     1862   1292    972     14     46   -266       N  
ATOM   1618  CA  ASP B  90     -25.463   8.208  17.069  1.00 12.56           C  
ANISOU 1618  CA  ASP B  90     2107   1448   1217    -11     37   -318       C  
ATOM   1619  C   ASP B  90     -26.333   9.225  16.351  1.00 12.25           C  
ANISOU 1619  C   ASP B  90     2017   1484   1153    -26     65   -268       C  
ATOM   1620  O   ASP B  90     -26.225  10.417  16.626  1.00 11.68           O  
ANISOU 1620  O   ASP B  90     1928   1416   1092    -62     93   -172       O  
ATOM   1621  CB  ASP B  90     -25.948   8.018  18.511  1.00 12.87           C  
ANISOU 1621  CB  ASP B  90     2233   1331   1327    -76     48   -293       C  
ATOM   1622  CG  ASP B  90     -27.397   7.560  18.592  1.00 14.62           C  
ANISOU 1622  CG  ASP B  90     2463   1485   1607   -113     54   -317       C  
ATOM   1623  OD1 ASP B  90     -27.811   6.711  17.773  1.00 13.93           O  
ANISOU 1623  OD1 ASP B  90     2340   1406   1548    -82      7   -400       O  
ATOM   1624  OD2 ASP B  90     -28.126   8.061  19.473  1.00 18.07           O1-
ANISOU 1624  OD2 ASP B  90     2933   1863   2070   -165    101   -261       O1-
ATOM   1625  N   TYR B  91     -27.160   8.769  15.410  1.00 10.61           N  
ANISOU 1625  N   TYR B  91     1777   1328    925      8     37   -340       N  
ATOM   1626  CA  TYR B  91     -28.086   9.667  14.722  1.00  9.64           C  
ANISOU 1626  CA  TYR B  91     1610   1269    784     -4     48   -296       C  
ATOM   1627  C   TYR B  91     -29.503   9.129  14.919  1.00 14.85           C  
ANISOU 1627  C   TYR B  91     2290   1821   1533    -37     23   -366       C  
ATOM   1628  O   TYR B  91     -29.703   7.938  15.165  1.00 18.62           O  
ANISOU 1628  O   TYR B  91     2790   2212   2072    -29    -17   -453       O  
ATOM   1629  CB  TYR B  91     -27.760   9.787  13.218  1.00 10.57           C  
ANISOU 1629  CB  TYR B  91     1653   1587    777     87     31   -305       C  
ATOM   1630  CG  TYR B  91     -28.249   8.605  12.396  1.00 10.65           C  
ANISOU 1630  CG  TYR B  91     1653   1635    758    171    -42   -467       C  
ATOM   1631  CD1 TYR B  91     -29.525   8.595  11.838  1.00 11.51           C  
ANISOU 1631  CD1 TYR B  91     1747   1735    891    178    -89   -521       C  
ATOM   1632  CD2 TYR B  91     -27.443   7.495  12.203  1.00  9.88           C  
ANISOU 1632  CD2 TYR B  91     1555   1568    632    249    -85   -581       C  
ATOM   1633  CE1 TYR B  91     -29.978   7.508  11.105  1.00 12.05           C  
ANISOU 1633  CE1 TYR B  91     1799   1818    962    264   -186   -690       C  
ATOM   1634  CE2 TYR B  91     -27.885   6.394  11.466  1.00 10.87           C  
ANISOU 1634  CE2 TYR B  91     1662   1711    759    341   -183   -758       C  
ATOM   1635  CZ  TYR B  91     -29.149   6.404  10.929  1.00 11.25           C  
ANISOU 1635  CZ  TYR B  91     1694   1742    838    348   -238   -814       C  
ATOM   1636  OH  TYR B  91     -29.585   5.312  10.217  1.00 13.30           O  
ANISOU 1636  OH  TYR B  91     1927   1999   1126    448   -363  -1007       O  
ATOM   1637  N   ALA B  92     -30.479  10.016  14.850  1.00 14.40           N  
ANISOU 1637  N   ALA B  92     2212   1753   1506    -78     40   -319       N  
ATOM   1638  CA  ALA B  92     -31.866   9.606  14.758  1.00 15.99           C  
ANISOU 1638  CA  ALA B  92     2401   1877   1796   -100     13   -382       C  
ATOM   1639  C   ALA B  92     -32.536  10.543  13.765  1.00 17.20           C  
ANISOU 1639  C   ALA B  92     2499   2121   1915    -82     -8   -357       C  
ATOM   1640  O   ALA B  92     -31.931  11.519  13.299  1.00 13.56           O  
ANISOU 1640  O   ALA B  92     2011   1769   1372    -66      7   -266       O  
ATOM   1641  CB  ALA B  92     -32.542   9.647  16.123  1.00 13.38           C  
ANISOU 1641  CB  ALA B  92     2107   1403   1572   -181     69   -344       C  
ATOM   1642  N   THR B  93     -33.779  10.243  13.421  1.00 13.80           N  
ANISOU 1642  N   THR B  93     2042   1639   1564    -86    -52   -425       N  
ATOM   1643  CA  THR B  93     -34.447  10.970  12.366  1.00 13.67           C  
ANISOU 1643  CA  THR B  93     1974   1708   1511    -55    -97   -418       C  
ATOM   1644  C   THR B  93     -35.653  11.717  12.937  1.00 16.51           C  
ANISOU 1644  C   THR B  93     2315   1961   1999   -132    -74   -384       C  
ATOM   1645  O   THR B  93     -36.393  11.183  13.780  1.00 16.59           O  
ANISOU 1645  O   THR B  93     2331   1837   2137   -184    -48   -421       O  
ATOM   1646  CB  THR B  93     -34.863  10.007  11.229  1.00 17.34           C  
ANISOU 1646  CB  THR B  93     2411   2227   1952     38   -203   -560       C  
ATOM   1647  CG2 THR B  93     -35.545  10.760  10.111  1.00 21.39           C  
ANISOU 1647  CG2 THR B  93     2878   2844   2405     85   -260   -550       C  
ATOM   1648  OG1 THR B  93     -33.691   9.365  10.700  1.00 20.89           O  
ANISOU 1648  OG1 THR B  93     2870   2799   2270    129   -223   -608       O  
ATOM   1649  N   LEU B  94     -35.829  12.960  12.502  1.00 15.46           N  
ANISOU 1649  N   LEU B  94     2148   1887   1838   -137    -80   -301       N  
ATOM   1650  CA  LEU B  94     -36.999  13.745  12.878  1.00 15.39           C  
ANISOU 1650  CA  LEU B  94     2106   1787   1952   -193    -77   -287       C  
ATOM   1651  C   LEU B  94     -37.892  13.885  11.655  1.00 16.60           C  
ANISOU 1651  C   LEU B  94     2209   1991   2107   -149   -169   -327       C  
ATOM   1652  O   LEU B  94     -37.426  14.229  10.569  1.00 16.73           O  
ANISOU 1652  O   LEU B  94     2211   2151   1996    -85   -217   -281       O  
ATOM   1653  CB  LEU B  94     -36.595  15.136  13.382  1.00 15.63           C  
ANISOU 1653  CB  LEU B  94     2128   1816   1995   -231    -46   -173       C  
ATOM   1654  CG  LEU B  94     -37.731  16.002  13.932  1.00 14.13           C  
ANISOU 1654  CG  LEU B  94     1899   1528   1943   -278    -45   -178       C  
ATOM   1655  CD1 LEU B  94     -38.359  15.345  15.147  1.00 15.19           C  
ANISOU 1655  CD1 LEU B  94     2054   1557   2162   -315     28   -250       C  
ATOM   1656  CD2 LEU B  94     -37.235  17.410  14.270  1.00 13.29           C  
ANISOU 1656  CD2 LEU B  94     1769   1413   1867   -298    -56    -82       C  
ATOM   1657  N   ASP B  95     -39.171  13.586  11.831  1.00 17.31           N  
ANISOU 1657  N   ASP B  95     2267   1971   2340   -176   -194   -407       N  
ATOM   1658  CA  ASP B  95     -40.152  13.787  10.780  1.00 19.34           C  
ANISOU 1658  CA  ASP B  95     2473   2248   2628   -136   -296   -456       C  
ATOM   1659  C   ASP B  95     -41.154  14.823  11.275  1.00 18.13           C  
ANISOU 1659  C   ASP B  95     2272   2001   2615   -200   -282   -421       C  
ATOM   1660  O   ASP B  95     -41.971  14.543  12.161  1.00 19.37           O  
ANISOU 1660  O   ASP B  95     2403   2033   2923   -255   -232   -467       O  
ATOM   1661  CB  ASP B  95     -40.844  12.457  10.447  1.00 24.48           C  
ANISOU 1661  CB  ASP B  95     3104   2832   3366   -101   -370   -605       C  
ATOM   1662  CG  ASP B  95     -42.014  12.622   9.492  1.00 31.48           C  
ANISOU 1662  CG  ASP B  95     3931   3707   4322    -60   -492   -680       C  
ATOM   1663  OD1 ASP B  95     -42.083  13.654   8.787  1.00 31.72           O  
ANISOU 1663  OD1 ASP B  95     3951   3832   4269    -32   -534   -613       O  
ATOM   1664  OD2 ASP B  95     -42.870  11.708   9.448  1.00 33.30           O1-
ANISOU 1664  OD2 ASP B  95     4120   3825   4709    -55   -558   -800       O1-
ATOM   1665  N   VAL B  96     -41.071  16.037  10.737  1.00 18.63           N  
ANISOU 1665  N   VAL B  96     2313   2129   2637   -192   -322   -328       N  
ATOM   1666  CA  VAL B  96     -42.013  17.079  11.124  1.00 19.65           C  
ANISOU 1666  CA  VAL B  96     2388   2166   2914   -240   -333   -310       C  
ATOM   1667  C   VAL B  96     -43.241  16.970  10.222  1.00 23.83           C  
ANISOU 1667  C   VAL B  96     2863   2671   3521   -209   -442   -387       C  
ATOM   1668  O   VAL B  96     -43.149  17.193   9.012  1.00 24.13           O  
ANISOU 1668  O   VAL B  96     2897   2816   3455   -145   -540   -356       O  
ATOM   1669  CB  VAL B  96     -41.408  18.485  11.014  1.00 18.45           C  
ANISOU 1669  CB  VAL B  96     2220   2055   2735   -251   -353   -169       C  
ATOM   1670  CG1 VAL B  96     -42.393  19.510  11.534  1.00 15.96           C  
ANISOU 1670  CG1 VAL B  96     1842   1623   2600   -294   -378   -182       C  
ATOM   1671  CG2 VAL B  96     -40.093  18.565  11.797  1.00 13.92           C  
ANISOU 1671  CG2 VAL B  96     1692   1503   2093   -270   -270   -100       C  
ATOM   1672  N   THR B  97     -44.378  16.607  10.814  1.00 23.25           N  
ANISOU 1672  N   THR B  97     2741   2465   3625   -248   -425   -482       N  
ATOM   1673  CA  THR B  97     -45.596  16.357  10.048  1.00 26.60           C  
ANISOU 1673  CA  THR B  97     3104   2839   4164   -221   -536   -576       C  
ATOM   1674  C   THR B  97     -46.487  17.596   9.947  1.00 33.30           C  
ANISOU 1674  C   THR B  97     3885   3634   5132   -242   -591   -552       C  
ATOM   1675  O   THR B  97     -46.462  18.467  10.816  1.00 29.32           O  
ANISOU 1675  O   THR B  97     3363   3086   4690   -290   -522   -503       O  
ATOM   1676  CB  THR B  97     -46.413  15.193  10.652  1.00 21.41           C  
ANISOU 1676  CB  THR B  97     2403   2053   3680   -253   -500   -683       C  
ATOM   1677  CG2 THR B  97     -45.595  13.905  10.660  1.00 23.81           C  
ANISOU 1677  CG2 THR B  97     2761   2385   3899   -228   -482   -717       C  
ATOM   1678  OG1 THR B  97     -46.792  15.509  11.995  1.00 21.66           O  
ANISOU 1678  OG1 THR B  97     2400   2001   3830   -328   -366   -655       O  
ATOM   1679  N   GLY B  98     -47.287  17.659   8.886  1.00 32.50           N  
ATOM   1680  CA  GLY B  98     -48.186  18.781   8.672  1.00 38.61           C  
ATOM   1681  C   GLY B  98     -47.500  19.971   8.024  1.00 45.29           C  
ATOM   1682  O   GLY B  98     -47.888  21.123   8.235  1.00 48.85           O  
HETATM 1683  O1  SO4 B 102     -24.531  12.227   8.458  1.00 35.40           O  
HETATM 1684  O2  SO4 B 102     -26.639  13.241   8.264  1.00 28.40           O  
HETATM 1685  O3  SO4 B 102     -26.192  11.923  10.175  1.00 31.70           O1-
HETATM 1686  O4  SO4 B 102     -25.054  13.956   9.965  1.00 30.08           O  
HETATM 1687  S   SO4 B 102     -25.614  12.849   9.204  1.00 29.09           S  
HETATM 1688  O   HOH B 103      -9.965  13.059  25.771  1.00 11.94           O  
HETATM 1689  O   HOH B 104     -30.300   6.214  17.549  1.00 13.41           O  
HETATM 1690  O   HOH B 105     -28.525   3.010  11.232  1.00 11.10           O  
HETATM 1691  O   HOH B 106     -13.118  13.273  32.531  1.00 28.01           O  
HETATM 1692  O   HOH B 107     -22.915  19.471  24.776  1.00 15.13           O  
HETATM 1693  O   HOH B 108     -24.873  17.674  24.084  1.00 17.48           O  
HETATM 1694  O   HOH B 109     -17.383  18.831  11.784  1.00 33.09           O  
HETATM 1695  O   HOH B 110     -16.984  15.435  18.808  1.00 15.49           O  
HETATM 1696  O   HOH B 111     -20.810  20.407  23.106  1.00 17.26           O  
HETATM 1697  O   HOH B 112     -33.420   8.136  23.537  1.00 18.14           O  
HETATM 1698  O   HOH B 113     -10.674  10.636  18.774  1.00 39.99           O  
HETATM 1699  O   HOH B 114     -34.443  10.446  21.870  1.00 14.13           O  
HETATM 1700  O   HOH B 115     -19.523  10.221  29.817  1.00 30.76           O  
HETATM 1701  O   HOH B 116     -20.851   3.263  20.751  1.00 18.33           O  
HETATM 1702  O   HOH B 117     -41.235  16.727   7.028  1.00 36.25           O  
HETATM 1703  O   HOH B 118     -27.097  15.346  10.745  1.00 45.62           O  
HETATM 1704  O   HOH B 119     -43.912  26.893  18.773  1.00 17.56           O  
HETATM 1705  O   HOH B 120     -18.620  17.648  26.636  1.00 21.33           O  
HETATM 1706  O   HOH B 121      -8.592  10.072  32.665  1.00 23.20           O  
HETATM 1707  O   HOH B 122     -22.214  21.196  17.675  1.00 14.40           O  
HETATM 1708  O   HOH B 123     -29.214  27.439  23.226  1.00 25.70           O  
HETATM 1709  O   HOH B 124     -24.168   9.282  32.092  1.00 27.27           O  
HETATM 1710  O   HOH B 125     -32.018   5.022  10.164  1.00 21.28           O  
HETATM 1711  O   HOH B 126     -44.148  21.342  22.191  1.00 23.19           O  
HETATM 1712  O   HOH B 127     -48.730  21.975  16.404  1.00 31.08           O  
HETATM 1713  O   HOH B 128     -35.648  25.702  10.477  1.00 39.94           O  
HETATM 1714  O   HOH B 129     -20.867  21.705   9.199  1.00 26.86           O  
HETATM 1715  O   HOH B 130     -28.288  16.911  29.290  1.00 17.72           O  
HETATM 1716  O   HOH B 131     -32.234   3.631  12.909  1.00 33.06           O  
HETATM 1717  O   HOH B 132      -8.242   5.996  34.112  1.00 37.36           O  
HETATM 1718  O   HOH B 133     -28.894  21.327   8.069  1.00 35.58           O  
HETATM 1719  O   HOH B 134     -15.675  10.224  32.940  1.00 33.38           O  
HETATM 1720  O   HOH B 135     -31.707   5.944  13.987  1.00 23.58           O  
HETATM 1721  O   HOH B 136     -37.194  11.537  21.786  1.00 36.46           O  
HETATM 1722  O   HOH B 137     -24.131  29.896  20.042  1.00 35.62           O  
HETATM 1723  O   HOH B 138     -33.398   6.959  11.845  1.00 24.00           O  
HETATM 1724  O   HOH B 139     -38.731  10.011  12.074  1.00 34.12           O  
HETATM 1725  O   HOH B 140     -27.322  25.948  13.987  1.00 34.78           O  
HETATM 1726  O   HOH B 141     -18.979   8.614  31.638  1.00 38.61           O  
HETATM 1727  O   HOH B 142     -33.125  22.336  13.129  1.00 26.04           O  
HETATM 1728  O   HOH B 143     -22.658  26.960  19.838  1.00 35.08           O  
HETATM 1729  O   HOH B 144     -29.497  13.346   6.343  1.00 29.13           O  
HETATM 1730  O   HOH B 145     -17.511   4.125  17.481  1.00 34.83           O  
HETATM 1731  O   HOH B 146     -26.109  25.113  11.536  1.00 30.26           O  
HETATM 1732  O   HOH B 147     -11.061  11.641  33.846  1.00 44.46           O  
HETATM 1733  O   HOH B 148     -11.273   2.181  24.189  1.00 30.98           O  
HETATM 1734  O   HOH B 149     -18.271  18.519  29.348  1.00 37.25           O  
HETATM 1735  O   HOH B 150     -35.216   4.151  24.720  1.00 42.73           O  
HETATM 1736  O   HOH B 151     -36.161   6.154  11.888  1.00 42.36           O  
HETATM 1737  O   HOH B 152     -33.169   4.026  22.836  1.00 30.33           O  
HETATM 1738  O   HOH B 153     -20.737  10.523  12.952  1.00 31.45           O  
HETATM 1739  O   HOH B 154     -32.647  27.828  23.084  1.00 41.02           O  
HETATM 1740  O   HOH B 155     -40.467   8.018  13.196  1.00 44.23           O  
HETATM 1741  O   HOH B 156     -41.962  15.842  20.275  1.00 35.56           O  
HETATM 1742  O   HOH B 157     -33.887  24.953  22.485  1.00 28.28           O  
HETATM 1743  O   HOH B 163     -34.832  25.279  25.078  1.00 35.56           O  
HETATM 1744  O   HOH B 164     -47.895  22.314  23.133  1.00 30.83           O  
HETATM 1745  O   HOH B 168     -12.717  20.942  18.756  1.00 36.30           O  
HETATM 1746  O   HOH B 171     -46.578  22.161  25.301  1.00 31.14           O  
HETATM 1747  O   HOH B 175     -12.378  15.651  21.581  1.00 31.41           O  
HETATM 1748  O   HOH B 179     -30.706  20.544   6.340  1.00 37.52           O  
HETATM 1749  O   HOH B 180     -22.153  25.062  11.485  1.00 37.82           O  
HETATM 1750  O   HOH B 183     -31.145  28.537  24.844  1.00 32.93           O  
HETATM 1751  O   HOH B 184     -18.277  21.774  11.148  1.00 44.02           O  
HETATM 1752  O   HOH B 185     -32.839  28.800  27.126  1.00 31.60           O  
HETATM 1753  O   HOH B 187     -28.447  23.866   7.022  1.00 45.35           O  
HETATM 1754  O   HOH B 191     -24.340  17.780   4.514  1.00 37.76           O  
HETATM 1755  O   HOH B 194     -15.923   3.735  20.644  1.00 39.85           O  
HETATM 1756  O   HOH B 195     -16.473   1.072  28.182  1.00 46.37           O  
HETATM 1757  O   HOH B 196     -24.438  21.584  28.857  1.00 46.78           O  
HETATM 1758  O   HOH B 197     -18.244   2.306  29.500  1.00 56.23           O  
HETATM 1759  O   HOH B 198     -29.755  -2.050  17.621  1.00 35.15           O  
HETATM 1760  O   HOH B 199     -31.356  20.314  25.509  1.00 30.44           O  
HETATM 1761  O   HOH B 201     -43.174  13.245  19.865  1.00 53.19           O  
HETATM 1762  O   HOH B 204     -33.139  27.014  11.322  1.00 37.06           O  
HETATM 1763  O   HOH B 205     -22.232   7.533  31.400  1.00 35.41           O  
HETATM 1764  O   HOH B 211     -26.597  -0.986  17.172  1.00 32.00           O  
HETATM 1765  O   HOH B 214     -41.081   6.964  18.292  1.00 43.81           O  
HETATM 1766  O   HOH B 215     -43.204   9.844  16.852  1.00 35.33           O  
HETATM 1767  O   HOH B 218     -39.719  15.275  22.212  1.00 33.76           O  
HETATM 1768  O   HOH B 219     -20.731  18.950  30.706  1.00 41.63           O  
HETATM 1769  O   HOH B 220     -13.142   4.997  17.804  1.00 27.48           O  
HETATM 1770  O   HOH B 221     -20.877  17.247  32.998  1.00 39.29           O  
HETATM 1771  O   HOH B 224     -39.749  24.679   7.020  1.00 28.19           O  
HETATM 1772  O   HOH B 225     -45.904   5.255  15.924  1.00 35.35           O  
HETATM 1773  O   HOH B 229     -36.124   4.500  16.074  1.00 40.62           O  
HETATM 1774  O   HOH B 230     -34.284  16.035   5.194  1.00 40.01           O  
HETATM 1775  O   HOH B 231     -34.781  19.070   5.700  1.00 40.43           O  
HETATM 1776  O   HOH B 232     -33.975   5.353  15.987  1.00 44.08           O  
HETATM 1777  O   HOH B 234     -44.544  19.238   7.502  1.00 39.74           O  
HETATM 1778  O   HOH B 236      -8.451  -1.018  30.547  1.00 37.84           O  
HETATM 1779  O   HOH B 238     -37.556  18.979   4.598  1.00 48.53           O  
HETATM 1780  O   HOH B 239     -34.914   7.559  25.877  1.00 39.71           O  
HETATM 1781  O   HOH B 242     -29.058  26.954  15.414  1.00 40.98           O  
HETATM 1782  O   HOH B 244     -33.986   0.979   4.487  1.00 34.51           O  
HETATM 1783  O   HOH B 245     -35.506   2.445   6.007  1.00 43.56           O  
HETATM 1784  O   HOH B 247     -39.706  19.752  24.761  1.00 33.15           O  
HETATM 1785  O   HOH B 250     -17.361  23.779  18.313  1.00 28.17           O  
HETATM 1786  O   HOH B 258     -23.450  22.026  26.078  1.00 40.88           O  
HETATM 1787  O   HOH B 259     -34.162   4.912   8.025  1.00 47.44           O  
HETATM 1788  O   HOH B 265     -30.335  23.241  10.848  1.00 22.91           O  
HETATM 1789  O   HOH B 273     -19.638  14.669   9.396  1.00 46.10           O  
HETATM 1790  O   HOH B 280     -30.142   1.932  23.308  1.00 38.25           O  
HETATM 1791  O   HOH B 281     -20.930  23.901  20.885  1.00 42.90           O  
HETATM 1792  O   HOH B 284     -27.113   3.497  30.165  1.00 41.67           O  
HETATM 1793  O   HOH B 286     -22.749   1.104  21.476  1.00 48.56           O  
HETATM 1794  O   HOH B 289     -49.497  16.341   6.234  1.00 38.70           O  
HETATM 1795  O   HOH B 290     -46.716  15.392   6.843  1.00 38.94           O  
HETATM 1796  O   HOH B 292     -18.978  12.512  28.357  1.00 35.69           O  
HETATM 1797  O   HOH B 294     -26.077   1.260  21.999  1.00 42.37           O  
HETATM 1798  O   HOH B 298     -43.501  17.440  21.517  1.00 45.26           O  
HETATM 1799  O   HOH B 299      -3.046   0.190  36.336  1.00 50.97           O  
HETATM 1800  O   HOH B 300     -27.865  19.828   4.690  1.00 47.61           O  
HETATM 1801  O   HOH B 303     -28.460  30.460  22.610  1.00 43.61           O  
HETATM 1802  O   HOH B 308     -18.455  13.413  11.581  1.00 40.11           O  
ATOM   1803  N   THR C   2     -17.178  21.920 -12.405  1.00 61.84           N  
ANISOU 1803  N   THR C   2    10062   7033   6400  -1199   -535   2113       N  
ATOM   1804  CA  THR C   2     -16.049  21.557 -11.554  1.00 60.36           C  
ANISOU 1804  CA  THR C   2     9567   7043   6325  -1031   -138   2015       C  
ATOM   1805  C   THR C   2     -15.758  20.063 -11.630  1.00 59.06           C  
ANISOU 1805  C   THR C   2     9613   6893   5933   -929     77   1916       C  
ATOM   1806  O   THR C   2     -16.602  19.283 -12.070  1.00 59.07           O  
ANISOU 1806  O   THR C   2     9927   6779   5739   -977   -126   1888       O  
ATOM   1807  CB  THR C   2     -16.308  21.941 -10.083  1.00 58.77           C  
ANISOU 1807  CB  THR C   2     8805   6978   6548   -965   -241   1934       C  
ATOM   1808  N   LEU C   3     -14.558  19.669 -11.213  1.00 56.96           N  
ANISOU 1808  N   LEU C   3     9172   6755   5717   -794    482   1877       N  
ATOM   1809  CA  LEU C   3     -14.232  18.253 -11.082  1.00 54.91           C  
ANISOU 1809  CA  LEU C   3     9012   6517   5333   -675    711   1783       C  
ATOM   1810  C   LEU C   3     -14.796  17.739  -9.763  1.00 48.61           C  
ANISOU 1810  C   LEU C   3     7830   5844   4797   -591    522   1669       C  
ATOM   1811  O   LEU C   3     -15.582  16.798  -9.741  1.00 46.44           O  
ANISOU 1811  O   LEU C   3     7710   5519   4417   -578    367   1590       O  
ATOM   1812  CB  LEU C   3     -12.722  18.032 -11.126  1.00 57.03           C  
ANISOU 1812  CB  LEU C   3     9196   6842   5630   -565   1217   1815       C  
ATOM   1813  N   ASP C   4     -14.395  18.377  -8.667  1.00 45.64           N  
ANISOU 1813  N   ASP C   4     6976   5617   4750   -552    536   1664       N  
ATOM   1814  CA  ASP C   4     -14.906  18.037  -7.341  1.00 40.42           C  
ANISOU 1814  CA  ASP C   4     5965   5061   4332   -503    369   1557       C  
ATOM   1815  C   ASP C   4     -16.432  18.002  -7.308  1.00 37.95           C  
ANISOU 1815  C   ASP C   4     5740   4641   4036   -576    -21   1505       C  
ATOM   1816  O   ASP C   4     -17.101  18.898  -7.835  1.00 33.98           O  
ANISOU 1816  O   ASP C   4     5332   4025   3554   -692   -249   1576       O  
ATOM   1817  CB  ASP C   4     -14.404  19.039  -6.303  1.00 38.07           C  
ANISOU 1817  CB  ASP C   4     5227   4891   4348   -521    381   1576       C  
ATOM   1818  CG  ASP C   4     -12.928  18.887  -6.014  1.00 37.22           C  
ANISOU 1818  CG  ASP C   4     4928   4895   4317   -441    720   1633       C  
ATOM   1819  OD1 ASP C   4     -12.244  18.140  -6.744  1.00 40.90           O  
ANISOU 1819  OD1 ASP C   4     5602   5321   4616   -365    994   1671       O  
ATOM   1820  OD2 ASP C   4     -12.453  19.517  -5.055  1.00 34.19           O1-
ANISOU 1820  OD2 ASP C   4     4190   4619   4179   -465    715   1649       O1-
ATOM   1821  N   HIS C   5     -16.978  16.968  -6.677  1.00 34.38           N  
ANISOU 1821  N   HIS C   5     5238   4213   3612   -511   -100   1394       N  
ATOM   1822  CA  HIS C   5     -18.422  16.839  -6.551  1.00 33.17           C  
ANISOU 1822  CA  HIS C   5     5124   3944   3535   -568   -452   1348       C  
ATOM   1823  C   HIS C   5     -18.750  16.080  -5.270  1.00 30.45           C  
ANISOU 1823  C   HIS C   5     4510   3688   3371   -487   -472   1214       C  
ATOM   1824  O   HIS C   5     -17.888  15.407  -4.707  1.00 26.93           O  
ANISOU 1824  O   HIS C   5     3946   3379   2908   -389   -238   1166       O  
ATOM   1825  CB  HIS C   5     -19.022  16.143  -7.782  1.00 37.63           C  
ANISOU 1825  CB  HIS C   5     6165   4344   3788   -616   -586   1385       C  
ATOM   1826  CG  HIS C   5     -18.603  14.710  -7.942  1.00 42.05           C  
ANISOU 1826  CG  HIS C   5     6932   4935   4110   -513   -376   1309       C  
ATOM   1827  CD2 HIS C   5     -19.087  13.571  -7.390  1.00 39.65           C  
ANISOU 1827  CD2 HIS C   5     6596   4649   3819   -435   -428   1200       C  
ATOM   1828  ND1 HIS C   5     -17.563  14.323  -8.763  1.00 45.27           N  
ANISOU 1828  ND1 HIS C   5     7620   5337   4245   -480    -43   1345       N  
ATOM   1829  CE1 HIS C   5     -17.424  13.011  -8.705  1.00 43.96           C  
ANISOU 1829  CE1 HIS C   5     7578   5179   3946   -385    107   1262       C  
ATOM   1830  NE2 HIS C   5     -18.337  12.528  -7.881  1.00 41.34           N  
ANISOU 1830  NE2 HIS C   5     7062   4873   3774   -356   -138   1174       N  
ATOM   1831  N   ALA C   6     -19.983  16.215  -4.798  1.00 30.16           N  
ANISOU 1831  N   ALA C   6     4369   3557   3535   -535   -745   1167       N  
ATOM   1832  CA  ALA C   6     -20.415  15.498  -3.605  1.00 25.94           C  
ANISOU 1832  CA  ALA C   6     3619   3076   3162   -475   -764   1034       C  
ATOM   1833  C   ALA C   6     -20.464  14.004  -3.902  1.00 24.32           C  
ANISOU 1833  C   ALA C   6     3638   2876   2727   -383   -725    978       C  
ATOM   1834  O   ALA C   6     -20.655  13.599  -5.049  1.00 24.72           O  
ANISOU 1834  O   ALA C   6     4040   2822   2530   -402   -786   1033       O  
ATOM   1835  CB  ALA C   6     -21.781  15.993  -3.153  1.00 27.18           C  
ANISOU 1835  CB  ALA C   6     3634   3079   3615   -549  -1029   1006       C  
ATOM   1836  N   PRO C   7     -20.303  13.172  -2.868  1.00 19.79           N  
ANISOU 1836  N   PRO C   7     2887   2411   2221   -299   -627    870       N  
ATOM   1837  CA  PRO C   7     -20.297  11.734  -3.144  1.00 21.11           C  
ANISOU 1837  CA  PRO C   7     3257   2582   2181   -205   -568    818       C  
ATOM   1838  C   PRO C   7     -21.572  11.313  -3.851  1.00 24.65           C  
ANISOU 1838  C   PRO C   7     3965   2845   2557   -250   -846    817       C  
ATOM   1839  O   PRO C   7     -22.657  11.843  -3.573  1.00 25.59           O  
ANISOU 1839  O   PRO C   7     3969   2847   2905   -322  -1098    816       O  
ATOM   1840  CB  PRO C   7     -20.200  11.110  -1.748  1.00 19.69           C  
ANISOU 1840  CB  PRO C   7     2798   2523   2162   -140   -501    709       C  
ATOM   1841  CG  PRO C   7     -19.530  12.175  -0.921  1.00 20.91           C  
ANISOU 1841  CG  PRO C   7     2657   2782   2505   -195   -413    733       C  
ATOM   1842  CD  PRO C   7     -20.086  13.467  -1.441  1.00 18.13           C  
ANISOU 1842  CD  PRO C   7     2326   2312   2249   -303   -563    796       C  
ATOM   1843  N   ARG C   8     -21.434  10.390  -4.795  1.00 23.57           N  
ANISOU 1843  N   ARG C   8     4184   2655   2116   -221   -796    829       N  
ATOM   1844  CA  ARG C   8     -22.577   9.883  -5.528  1.00 23.04           C  
ANISOU 1844  CA  ARG C   8     4413   2402   1940   -285  -1083    842       C  
ATOM   1845  C   ARG C   8     -22.566   8.378  -5.397  1.00 27.48           C  
ANISOU 1845  C   ARG C   8     5106   2989   2346   -183   -987    743       C  
ATOM   1846  O   ARG C   8     -21.612   7.729  -5.808  1.00 29.06           O  
ANISOU 1846  O   ARG C   8     5488   3246   2309   -115   -699    732       O  
ATOM   1847  CB  ARG C   8     -22.496  10.288  -7.006  1.00 29.14           C  
ANISOU 1847  CB  ARG C   8     5609   3036   2426   -403  -1152    967       C  
ATOM   1848  N   ILE C   9     -23.615   7.825  -4.803  1.00 28.17           N  
ANISOU 1848  N   ILE C   9     5087   3020   2598   -170  -1202    673       N  
ATOM   1849  CA  ILE C   9     -23.742   6.376  -4.708  1.00 27.93           C  
ANISOU 1849  CA  ILE C   9     5192   2994   2426    -81  -1148    581       C  
ATOM   1850  C   ILE C   9     -24.332   5.802  -5.995  1.00 30.46           C  
ANISOU 1850  C   ILE C   9     5998   3123   2451   -169  -1335    629       C  
ATOM   1851  O   ILE C   9     -25.518   5.986  -6.305  1.00 31.45           O  
ANISOU 1851  O   ILE C   9     6202   3074   2671   -276  -1706    684       O  
ATOM   1852  CB  ILE C   9     -24.561   5.968  -3.492  1.00 23.92           C  
ANISOU 1852  CB  ILE C   9     4375   2504   2211    -30  -1270    481       C  
ATOM   1853  CG1 ILE C   9     -23.905   6.546  -2.231  1.00 23.87           C  
ANISOU 1853  CG1 ILE C   9     3962   2672   2437     16  -1080    434       C  
ATOM   1854  CG2 ILE C   9     -24.657   4.443  -3.402  1.00 20.93           C  
ANISOU 1854  CG2 ILE C   9     4135   2135   1683     66  -1209    389       C  
ATOM   1855  CD1 ILE C   9     -24.622   6.231  -0.950  1.00 21.58           C  
ANISOU 1855  CD1 ILE C   9     3394   2391   2415     44  -1148    328       C  
ATOM   1856  N   THR C  10     -23.478   5.112  -6.744  1.00 28.89           N  
ANISOU 1856  N   THR C  10     6133   2934   1908   -136  -1069    620       N  
ATOM   1857  CA  THR C  10     -23.821   4.638  -8.079  1.00 31.69           C  
ANISOU 1857  CA  THR C  10     7048   3095   1897   -254  -1186    667       C  
ATOM   1858  C   THR C  10     -24.338   3.203  -8.072  1.00 31.61           C  
ANISOU 1858  C   THR C  10     7229   3020   1761   -210  -1234    574       C  
ATOM   1859  O   THR C  10     -24.944   2.743  -9.038  1.00 34.76           O  
ANISOU 1859  O   THR C  10     8085   3230   1892   -337  -1440    608       O  
ATOM   1860  CB  THR C  10     -22.611   4.752  -9.009  1.00 34.97           C  
ANISOU 1860  CB  THR C  10     7792   3507   1987   -270   -819    706       C  
ATOM   1861  CG2 THR C  10     -22.207   6.219  -9.166  1.00 36.61           C  
ANISOU 1861  CG2 THR C  10     7861   3750   2299   -340   -819    815       C  
ATOM   1862  OG1 THR C  10     -21.515   4.024  -8.445  1.00 33.91           O  
ANISOU 1862  OG1 THR C  10     7486   3521   1875    -93   -378    622       O  
ATOM   1863  N   LEU C  11     -24.085   2.479  -6.990  1.00 27.45           N  
ANISOU 1863  N   LEU C  11     6375   2642   1412    -44  -1056    463       N  
ATOM   1864  CA  LEU C  11     -24.630   1.154  -6.773  1.00 25.87           C  
ANISOU 1864  CA  LEU C  11     6267   2400   1163     16  -1112    368       C  
ATOM   1865  C   LEU C  11     -25.099   1.074  -5.308  1.00 25.95           C  
ANISOU 1865  C   LEU C  11     5763   2530   1566    119  -1198    294       C  
ATOM   1866  O   LEU C  11     -24.345   1.284  -4.424  1.00 24.58           O  
ANISOU 1866  O   LEU C  11     5252   2531   1556    217   -969    261       O  
ATOM   1867  CB  LEU C  11     -23.585   0.087  -7.067  1.00 30.31           C  
ANISOU 1867  CB  LEU C  11     7045   3001   1468    122   -688    301       C  
ATOM   1868  CG  LEU C  11     -23.960  -1.402  -6.992  1.00 35.90           C  
ANISOU 1868  CG  LEU C  11     7916   3655   2067    188   -670    199       C  
ATOM   1869  CD1 LEU C  11     -23.711  -2.021  -5.713  1.00 29.88           C  
ANISOU 1869  CD1 LEU C  11     6723   3062   1567    360   -530    114       C  
ATOM   1870  CD2 LEU C  11     -25.386  -1.719  -7.404  1.00 42.35           C  
ANISOU 1870  CD2 LEU C  11     8976   4288   2827     59  -1126    208       C  
ATOM   1871  N   ARG C  12     -26.359   0.814  -5.091  1.00 23.65           N  
ANISOU 1871  N   ARG C  12     5435   2122   1427     74  -1536    280       N  
ATOM   1872  CA  ARG C  12     -26.903   0.871  -3.739  1.00 25.56           C  
ANISOU 1872  CA  ARG C  12     5224   2436   2052    144  -1606    212       C  
ATOM   1873  C   ARG C  12     -26.984  -0.494  -3.054  1.00 25.53           C  
ANISOU 1873  C   ARG C  12     5159   2491   2049    269  -1504     90       C  
ATOM   1874  O   ARG C  12     -26.996  -1.536  -3.715  1.00 25.42           O  
ANISOU 1874  O   ARG C  12     5473   2409   1776    284  -1481     64       O  
ATOM   1875  CB  ARG C  12     -28.274   1.543  -3.754  1.00 28.65           C  
ANISOU 1875  CB  ARG C  12     5520   2640   2725     27  -2009    282       C  
ATOM   1876  CG  ARG C  12     -28.270   2.865  -4.494  1.00 35.43           C  
ANISOU 1876  CG  ARG C  12     6449   3416   3595   -107  -2147    421       C  
ATOM   1877  CD  ARG C  12     -29.548   3.657  -4.266  1.00 41.27           C  
ANISOU 1877  CD  ARG C  12     6967   3971   4743   -204  -2499    504       C  
ATOM   1878  NE  ARG C  12     -29.596   4.210  -2.916  1.00 41.97           N  
ANISOU 1878  NE  ARG C  12     6589   4149   5210   -135  -2357    427       N  
ATOM   1879  CZ  ARG C  12     -29.013   5.349  -2.553  1.00 41.78           C  
ANISOU 1879  CZ  ARG C  12     6356   4217   5301   -150  -2208    446       C  
ATOM   1880  NH1 ARG C  12     -28.338   6.064  -3.445  1.00 46.31           N1+
ANISOU 1880  NH1 ARG C  12     7116   4814   5665   -217  -2182    546       N1+
ATOM   1881  NH2 ARG C  12     -29.104   5.773  -1.298  1.00 35.16           N  
ANISOU 1881  NH2 ARG C  12     5149   3434   4775   -113  -2075    363       N  
ATOM   1882  N   MET C  13     -27.037  -0.464  -1.725  1.00 20.59           N  
ANISOU 1882  N   MET C  13     4138   1979   1706    343  -1436     17       N  
ATOM   1883  CA  MET C  13     -27.178  -1.658  -0.912  1.00 22.16           C  
ANISOU 1883  CA  MET C  13     4232   2236   1953    452  -1360    -92       C  
ATOM   1884  C   MET C  13     -28.506  -2.317  -1.177  1.00 18.79           C  
ANISOU 1884  C   MET C  13     3941   1619   1580    416  -1656   -110       C  
ATOM   1885  O   MET C  13     -29.464  -1.654  -1.550  1.00 20.61           O  
ANISOU 1885  O   MET C  13     4188   1679   1964    306  -1949    -36       O  
ATOM   1886  CB  MET C  13     -27.097  -1.308   0.580  1.00 22.93           C  
ANISOU 1886  CB  MET C  13     3914   2458   2341    488  -1270   -154       C  
ATOM   1887  CG  MET C  13     -25.736  -0.878   1.040  1.00 21.32           C  
ANISOU 1887  CG  MET C  13     3547   2451   2103    523   -995   -133       C  
ATOM   1888  SD  MET C  13     -25.696  -0.774   2.828  1.00 20.00           S  
ANISOU 1888  SD  MET C  13     2991   2405   2203    530   -922   -214       S  
ATOM   1889  CE  MET C  13     -26.491   0.800   3.109  1.00 15.79           C  
ANISOU 1889  CE  MET C  13     2300   1760   1938    394  -1078   -195       C  
ATOM   1890  N   ARG C  14     -28.561  -3.627  -0.955  1.00 20.48           N  
ANISOU 1890  N   ARG C  14     3419   1695   2669   -108  -1064    562       N  
ATOM   1891  CA  ARG C  14     -29.789  -4.385  -1.136  1.00 22.73           C  
ANISOU 1891  CA  ARG C  14     3664   1936   3037   -122  -1212    617       C  
ATOM   1892  C   ARG C  14     -30.321  -4.851   0.216  1.00 22.31           C  
ANISOU 1892  C   ARG C  14     3530   1847   3102   -169  -1188    625       C  
ATOM   1893  O   ARG C  14     -29.664  -5.639   0.910  1.00 21.91           O  
ANISOU 1893  O   ARG C  14     3499   1808   3018   -187  -1179    547       O  
ATOM   1894  CB  ARG C  14     -29.521  -5.588  -2.035  1.00 27.06           C  
ANISOU 1894  CB  ARG C  14     4299   2500   3482   -105  -1373    563       C  
ATOM   1895  CG  ARG C  14     -30.762  -6.184  -2.669  1.00 33.68           C  
ANISOU 1895  CG  ARG C  14     5119   3300   4378   -116  -1545    630       C  
ATOM   1896  CD  ARG C  14     -30.393  -7.330  -3.594  1.00 37.81           C  
ANISOU 1896  CD  ARG C  14     5748   3837   4783    -98  -1696    569       C  
ATOM   1897  NE  ARG C  14     -30.073  -8.543  -2.849  1.00 40.79           N  
ANISOU 1897  NE  ARG C  14     6141   4205   5152   -122  -1737    496       N  
ATOM   1898  CZ  ARG C  14     -30.982  -9.433  -2.459  1.00 46.90           C  
ANISOU 1898  CZ  ARG C  14     6874   4934   6010   -162  -1848    523       C  
ATOM   1899  NH1 ARG C  14     -32.265  -9.242  -2.747  1.00 48.36           N1+
ANISOU 1899  NH1 ARG C  14     6996   5084   6293   -184  -1929    624       N1+
ATOM   1900  NH2 ARG C  14     -30.612 -10.517  -1.785  1.00 49.58           N  
ANISOU 1900  NH2 ARG C  14     7235   5266   6336   -182  -1878    454       N  
ATOM   1901  N   SER C  15     -31.488  -4.347   0.610  1.00 19.67           N  
ANISOU 1901  N   SER C  15     3103   1468   2903   -186  -1171    721       N  
ATOM   1902  CA  SER C  15     -32.153  -4.871   1.796  1.00 18.81           C  
ANISOU 1902  CA  SER C  15     2914   1322   2912   -228  -1169    740       C  
ATOM   1903  C   SER C  15     -32.400  -6.346   1.580  1.00 22.39           C  
ANISOU 1903  C   SER C  15     3392   1767   3347   -246  -1341    708       C  
ATOM   1904  O   SER C  15     -32.770  -6.756   0.484  1.00 23.83           O  
ANISOU 1904  O   SER C  15     3614   1950   3490   -231  -1481    730       O  
ATOM   1905  CB  SER C  15     -33.481  -4.169   2.034  1.00 18.33           C  
ANISOU 1905  CB  SER C  15     2752   1217   2996   -235  -1147    861       C  
ATOM   1906  OG  SER C  15     -33.272  -2.797   2.276  1.00 19.25           O  
ANISOU 1906  OG  SER C  15     2850   1332   3131   -218   -982    891       O  
ATOM   1907  N   HIS C  16     -32.211  -7.150   2.618  1.00 18.48           N  
ANISOU 1907  N   HIS C  16     2878   1264   2881   -279  -1333    659       N  
ATOM   1908  CA  HIS C  16     -32.306  -8.587   2.429  1.00 21.16           C  
ANISOU 1908  CA  HIS C  16     3255   1594   3189   -295  -1490    618       C  
ATOM   1909  C   HIS C  16     -32.485  -9.345   3.736  1.00 21.62           C  
ANISOU 1909  C   HIS C  16     3259   1631   3326   -339  -1477    597       C  
ATOM   1910  O   HIS C  16     -32.326  -8.783   4.830  1.00 24.31           O  
ANISOU 1910  O   HIS C  16     3544   1969   3725   -356  -1334    597       O  
ATOM   1911  CB  HIS C  16     -31.091  -9.102   1.645  1.00 18.54           C  
ANISOU 1911  CB  HIS C  16     3045   1306   2694   -261  -1530    519       C  
ATOM   1912  CG  HIS C  16     -29.796  -9.044   2.403  1.00 17.71           C  
ANISOU 1912  CG  HIS C  16     2969   1239   2521   -258  -1399    429       C  
ATOM   1913  CD2 HIS C  16     -29.126  -9.995   3.100  1.00 17.30           C  
ANISOU 1913  CD2 HIS C  16     2942   1198   2434   -272  -1402    349       C  
ATOM   1914  ND1 HIS C  16     -29.011  -7.912   2.454  1.00 16.67           N  
ANISOU 1914  ND1 HIS C  16     2847   1143   2344   -238  -1248    416       N  
ATOM   1915  CE1 HIS C  16     -27.933  -8.156   3.178  1.00 15.86           C  
ANISOU 1915  CE1 HIS C  16     2768   1074   2185   -245  -1164    335       C  
ATOM   1916  NE2 HIS C  16     -27.974  -9.415   3.575  1.00 15.44           N  
ANISOU 1916  NE2 HIS C  16     2724   1007   2135   -263  -1254    294       N  
ATOM   1917  N   ARG C  17     -32.850 -10.615   3.607  1.00 20.07           N  
ANISOU 1917  N   ARG C  17     3082   1414   3130   -360  -1629    581       N  
ATOM   1918  CA  ARG C  17     -32.982 -11.525   4.733  1.00 22.10           C  
ANISOU 1918  CA  ARG C  17     3299   1650   3448   -401  -1641    555       C  
ATOM   1919  C   ARG C  17     -31.738 -12.389   4.805  1.00 21.11           C  
ANISOU 1919  C   ARG C  17     3267   1554   3201   -390  -1649    437       C  
ATOM   1920  O   ARG C  17     -31.042 -12.572   3.809  1.00 22.54           O  
ANISOU 1920  O   ARG C  17     3545   1761   3257   -352  -1698    387       O  
ATOM   1921  CB  ARG C  17     -34.185 -12.458   4.536  1.00 30.61           C  
ANISOU 1921  CB  ARG C  17     4344   2685   4603   -436  -1813    614       C  
ATOM   1922  CG  ARG C  17     -35.536 -11.787   4.534  1.00 37.13           C  
ANISOU 1922  CG  ARG C  17     5064   3481   5562   -451  -1822    742       C  
ATOM   1923  CD  ARG C  17     -36.653 -12.829   4.544  1.00 44.03           C  
ANISOU 1923  CD  ARG C  17     5897   4317   6515   -496  -1988    797       C  
ATOM   1924  NE  ARG C  17     -36.821 -13.469   3.244  1.00 50.02           N  
ANISOU 1924  NE  ARG C  17     6737   5073   7195   -491  -2164    794       N  
ATOM   1925  CZ  ARG C  17     -37.665 -13.041   2.309  1.00 58.49           C  
ANISOU 1925  CZ  ARG C  17     7789   6141   8294   -486  -2245    885       C  
ATOM   1926  NH1 ARG C  17     -38.422 -11.972   2.530  1.00 57.60           N1+
ANISOU 1926  NH1 ARG C  17     7573   6024   8287   -481  -2162    987       N1+
ATOM   1927  NH2 ARG C  17     -37.759 -13.683   1.151  1.00 63.49           N  
ANISOU 1927  NH2 ARG C  17     8507   6771   8845   -486  -2407    875       N  
ATOM   1928  N   VAL C  18     -31.461 -12.927   5.985  1.00 17.31           N  
ANISOU 1928  N   VAL C  18     2756   1069   2754   -420  -1600    396       N  
ATOM   1929  CA  VAL C  18     -30.381 -13.888   6.140  1.00 17.16           C  
ANISOU 1929  CA  VAL C  18     2815   1073   2631   -410  -1619    292       C  
ATOM   1930  C   VAL C  18     -30.781 -14.826   7.262  1.00 18.75           C  
ANISOU 1930  C   VAL C  18     2964   1244   2916   -457  -1650    287       C  
ATOM   1931  O   VAL C  18     -31.304 -14.376   8.276  1.00 21.48           O  
ANISOU 1931  O   VAL C  18     3215   1573   3373   -491  -1565    333       O  
ATOM   1932  CB  VAL C  18     -29.018 -13.210   6.447  1.00 18.52           C  
ANISOU 1932  CB  VAL C  18     3019   1302   2714   -385  -1460    226       C  
ATOM   1933  CG1 VAL C  18     -29.071 -12.417   7.745  1.00 15.15           C  
ANISOU 1933  CG1 VAL C  18     2504    875   2379   -419  -1302    249       C  
ATOM   1934  CG2 VAL C  18     -27.912 -14.253   6.507  1.00 17.82           C  
ANISOU 1934  CG2 VAL C  18     3013   1243   2516   -368  -1489    126       C  
ATOM   1935  N   PRO C  19     -30.579 -16.139   7.074  1.00 19.44           N  
ANISOU 1935  N   PRO C  19     3116   1320   2951   -459  -1773    233       N  
ATOM   1936  CA  PRO C  19     -31.003 -17.062   8.132  1.00 21.62           C  
ANISOU 1936  CA  PRO C  19     3343   1563   3309   -506  -1808    231       C  
ATOM   1937  C   PRO C  19     -30.117 -16.909   9.356  1.00 20.90           C  
ANISOU 1937  C   PRO C  19     3224   1502   3213   -516  -1659    177       C  
ATOM   1938  O   PRO C  19     -28.917 -16.634   9.195  1.00 19.85           O  
ANISOU 1938  O   PRO C  19     3151   1418   2972   -481  -1578    111       O  
ATOM   1939  CB  PRO C  19     -30.807 -18.447   7.497  1.00 24.64           C  
ANISOU 1939  CB  PRO C  19     3825   1929   3611   -497  -1968    176       C  
ATOM   1940  CG  PRO C  19     -30.763 -18.193   6.004  1.00 27.60           C  
ANISOU 1940  CG  PRO C  19     4282   2312   3895   -456  -2046    181       C  
ATOM   1941  CD  PRO C  19     -30.096 -16.847   5.877  1.00 23.46           C  
ANISOU 1941  CD  PRO C  19     3745   1836   3332   -421  -1892    181       C  
ATOM   1942  N   CYS C  20     -30.689 -17.068  10.551  1.00 18.64           N  
ANISOU 1942  N   CYS C  20     2849   1191   3042   -563  -1622    209       N  
ATOM   1943  CA  CYS C  20     -29.905 -16.953  11.779  1.00 18.20           C  
ANISOU 1943  CA  CYS C  20     2766   1162   2987   -579  -1485    161       C  
ATOM   1944  C   CYS C  20     -28.675 -17.827  11.692  1.00 18.20           C  
ANISOU 1944  C   CYS C  20     2857   1197   2862   -554  -1504     61       C  
ATOM   1945  O   CYS C  20     -28.757 -18.973  11.251  1.00 18.04           O  
ANISOU 1945  O   CYS C  20     2892   1154   2806   -548  -1641     34       O  
ATOM   1946  CB  CYS C  20     -30.719 -17.363  13.001  1.00 20.85           C  
ANISOU 1946  CB  CYS C  20     3009   1461   3452   -634  -1481    201       C  
ATOM   1947  SG  CYS C  20     -32.098 -16.269  13.381  1.00 30.18           S  
ANISOU 1947  SG  CYS C  20     4070   2606   4790   -660  -1421    322       S  
ATOM   1948  N   GLY C  21     -27.536 -17.282  12.116  1.00 19.91           N  
ANISOU 1948  N   GLY C  21     3087   1467   3011   -541  -1367     10       N  
ATOM   1949  CA  GLY C  21     -26.303 -18.042  12.149  1.00 19.69           C  
ANISOU 1949  CA  GLY C  21     3132   1480   2868   -515  -1366    -78       C  
ATOM   1950  C   GLY C  21     -25.395 -17.794  10.959  1.00 20.73           C  
ANISOU 1950  C   GLY C  21     3359   1657   2862   -454  -1371   -119       C  
ATOM   1951  O   GLY C  21     -24.168 -17.897  11.062  1.00 21.84           O  
ANISOU 1951  O   GLY C  21     3544   1852   2902   -428  -1306   -183       O  
ATOM   1952  N   GLN C  22     -25.993 -17.487   9.817  1.00 18.33           N  
ANISOU 1952  N   GLN C  22     3083   1331   2549   -431  -1450    -80       N  
ATOM   1953  CA  GLN C  22     -25.211 -17.280   8.610  1.00 18.36           C  
ANISOU 1953  CA  GLN C  22     3180   1374   2422   -372  -1464   -116       C  
ATOM   1954  C   GLN C  22     -24.467 -15.945   8.664  1.00 17.38           C  
ANISOU 1954  C   GLN C  22     3039   1306   2259   -360  -1306   -115       C  
ATOM   1955  O   GLN C  22     -24.831 -15.044   9.432  1.00 16.89           O  
ANISOU 1955  O   GLN C  22     2896   1238   2285   -397  -1201    -71       O  
ATOM   1956  CB  GLN C  22     -26.108 -17.362   7.369  1.00 21.39           C  
ANISOU 1956  CB  GLN C  22     3601   1718   2808   -355  -1601    -71       C  
ATOM   1957  CG  GLN C  22     -26.712 -18.743   7.127  1.00 22.08           C  
ANISOU 1957  CG  GLN C  22     3730   1753   2907   -365  -1771    -80       C  
ATOM   1958  CD  GLN C  22     -25.662 -19.786   6.830  1.00 23.14           C  
ANISOU 1958  CD  GLN C  22     3971   1908   2914   -323  -1814   -168       C  
ATOM   1959  NE2 GLN C  22     -25.756 -20.930   7.496  1.00 24.01           N  
ANISOU 1959  NE2 GLN C  22     4084   1988   3051   -346  -1874   -196       N  
ATOM   1960  OE1 GLN C  22     -24.772 -19.567   6.014  1.00 24.59           O  
ANISOU 1960  OE1 GLN C  22     4233   2134   2976   -267  -1790   -209       O  
ATOM   1961  N   ASN C  23     -23.408 -15.822   7.871  1.00 17.31           N  
ANISOU 1961  N   ASN C  23     3110   1350   2118   -308  -1285   -162       N  
ATOM   1962  CA  ASN C  23     -22.752 -14.526   7.699  1.00 15.70           C  
ANISOU 1962  CA  ASN C  23     2900   1197   1869   -295  -1151   -155       C  
ATOM   1963  C   ASN C  23     -23.503 -13.742   6.625  1.00 15.63           C  
ANISOU 1963  C   ASN C  23     2898   1164   1875   -277  -1192    -95       C  
ATOM   1964  O   ASN C  23     -24.216 -14.337   5.822  1.00 16.90           O  
ANISOU 1964  O   ASN C  23     3093   1286   2040   -262  -1331    -77       O  
ATOM   1965  CB  ASN C  23     -21.291 -14.702   7.280  1.00 17.62           C  
ANISOU 1965  CB  ASN C  23     3219   1512   1963   -246  -1110   -224       C  
ATOM   1966  CG  ASN C  23     -20.478 -15.507   8.284  1.00 17.31           C  
ANISOU 1966  CG  ASN C  23     3174   1503   1899   -258  -1071   -280       C  
ATOM   1967  ND2 ASN C  23     -19.497 -16.238   7.781  1.00 16.96           N  
ANISOU 1967  ND2 ASN C  23     3209   1501   1734   -205  -1102   -338       N  
ATOM   1968  OD1 ASN C  23     -20.725 -15.468   9.490  1.00 13.22           O  
ANISOU 1968  OD1 ASN C  23     2583    972   1469   -312  -1013   -269       O  
ATOM   1969  N   THR C  24     -23.363 -12.418   6.599  1.00 12.72           N  
ANISOU 1969  N   THR C  24     2500    819   1515   -280  -1075    -62       N  
ATOM   1970  CA  THR C  24     -24.000 -11.648   5.534  1.00 15.71           C  
ANISOU 1970  CA  THR C  24     2888   1180   1900   -258  -1110     -5       C  
ATOM   1971  C   THR C  24     -23.174 -10.413   5.177  1.00 15.60           C  
ANISOU 1971  C   THR C  24     2893   1219   1816   -237   -983     -6       C  
ATOM   1972  O   THR C  24     -22.251 -10.037   5.900  1.00 16.85           O  
ANISOU 1972  O   THR C  24     3040   1421   1940   -252   -860    -41       O  
ATOM   1973  CB  THR C  24     -25.468 -11.265   5.884  1.00 13.60           C  
ANISOU 1973  CB  THR C  24     2535    848   1785   -297  -1133     82       C  
ATOM   1974  CG2 THR C  24     -25.516 -10.042   6.801  1.00 13.15           C  
ANISOU 1974  CG2 THR C  24     2403    792   1801   -330   -970    118       C  
ATOM   1975  OG1 THR C  24     -26.210 -10.996   4.685  1.00 14.37           O  
ANISOU 1975  OG1 THR C  24     2654    922   1883   -271  -1227    135       O  
ATOM   1976  N   ARG C  25     -23.497  -9.790   4.053  1.00 15.09           N  
ANISOU 1976  N   ARG C  25     2857   1151   1726   -205  -1017     33       N  
ATOM   1977  CA  ARG C  25     -22.757  -8.617   3.616  1.00 16.79           C  
ANISOU 1977  CA  ARG C  25     3094   1414   1872   -184   -905     36       C  
ATOM   1978  C   ARG C  25     -23.703  -7.634   2.959  1.00 17.02           C  
ANISOU 1978  C   ARG C  25     3098   1408   1961   -179   -911    118       C  
ATOM   1979  O   ARG C  25     -24.690  -8.039   2.342  1.00 14.74           O  
ANISOU 1979  O   ARG C  25     2808   1076   1715   -171  -1037    159       O  
ATOM   1980  CB  ARG C  25     -21.677  -9.014   2.605  1.00 21.87           C  
ANISOU 1980  CB  ARG C  25     3836   2115   2360   -127   -941    -22       C  
ATOM   1981  N   PHE C  26     -23.395  -6.350   3.109  1.00 13.92           N  
ANISOU 1981  N   PHE C  26     3133   1037   1117     90   -478     52       N  
ATOM   1982  CA  PHE C  26     -24.006  -5.296   2.323  1.00 15.79           C  
ANISOU 1982  CA  PHE C  26     3396   1270   1333     34   -525    105       C  
ATOM   1983  C   PHE C  26     -22.900  -4.721   1.440  1.00 16.32           C  
ANISOU 1983  C   PHE C  26     3543   1376   1284     72   -403     68       C  
ATOM   1984  O   PHE C  26     -21.752  -4.600   1.874  1.00 13.90           O  
ANISOU 1984  O   PHE C  26     3169   1126    986    136   -264     30       O  
ATOM   1985  CB  PHE C  26     -24.571  -4.185   3.222  1.00 15.73           C  
ANISOU 1985  CB  PHE C  26     3204   1308   1467      0   -515    168       C  
ATOM   1986  CG  PHE C  26     -25.839  -4.557   3.942  1.00 15.09           C  
ANISOU 1986  CG  PHE C  26     3042   1180   1509    -47   -622    223       C  
ATOM   1987  CD1 PHE C  26     -27.070  -4.501   3.289  1.00 15.58           C  
ANISOU 1987  CD1 PHE C  26     3141   1166   1613   -116   -771    296       C  
ATOM   1988  CD2 PHE C  26     -25.809  -4.934   5.279  1.00 18.51           C  
ANISOU 1988  CD2 PHE C  26     3362   1645   2028    -30   -576    214       C  
ATOM   1989  CE1 PHE C  26     -28.234  -4.829   3.950  1.00 16.88           C  
ANISOU 1989  CE1 PHE C  26     3212   1282   1917   -158   -858    362       C  
ATOM   1990  CE2 PHE C  26     -26.981  -5.271   5.954  1.00 18.48           C  
ANISOU 1990  CE2 PHE C  26     3282   1600   2141    -74   -654    272       C  
ATOM   1991  CZ  PHE C  26     -28.189  -5.217   5.294  1.00 17.65           C  
ANISOU 1991  CZ  PHE C  26     3196   1417   2095   -133   -787    347       C  
ATOM   1992  N   ILE C  27     -23.251  -4.363   0.210  1.00 15.90           N  
ANISOU 1992  N   ILE C  27     3629   1286   1127     25   -462     90       N  
ATOM   1993  CA  ILE C  27     -22.286  -3.852  -0.757  1.00 17.00           C  
ANISOU 1993  CA  ILE C  27     3868   1455   1135     51   -345     63       C  
ATOM   1994  C   ILE C  27     -22.870  -2.622  -1.442  1.00 19.51           C  
ANISOU 1994  C   ILE C  27     4192   1779   1441    -25   -410    143       C  
ATOM   1995  O   ILE C  27     -24.042  -2.619  -1.839  1.00 20.66           O  
ANISOU 1995  O   ILE C  27     4391   1860   1599   -107   -580    203       O  
ATOM   1996  CB  ILE C  27     -21.947  -4.939  -1.819  1.00 24.67           C  
ANISOU 1996  CB  ILE C  27     5083   2357   1932     70   -336     -8       C  
ATOM   1997  CG1 ILE C  27     -21.353  -6.169  -1.139  1.00 26.46           C  
ANISOU 1997  CG1 ILE C  27     5291   2565   2197    150   -273    -83       C  
ATOM   1998  CG2 ILE C  27     -20.985  -4.403  -2.868  1.00 26.19           C  
ANISOU 1998  CG2 ILE C  27     5394   2578   1978     93   -193    -32       C  
ATOM   1999  CD1 ILE C  27     -21.393  -7.458  -1.978  1.00 30.77           C  
ANISOU 1999  CD1 ILE C  27     6072   3010   2608    160   -310   -156       C  
ATOM   2000  N   LEU C  28     -22.061  -1.590  -1.580  1.00 15.74           N  
ANISOU 2000  N   LEU C  28     3654   1370    955     -4   -288    155       N  
ATOM   2001  CA  LEU C  28     -22.419  -0.411  -2.351  1.00 16.39           C  
ANISOU 2001  CA  LEU C  28     3756   1459   1014    -73   -335    231       C  
ATOM   2002  C   LEU C  28     -21.192   0.158  -3.033  1.00 15.78           C  
ANISOU 2002  C   LEU C  28     3730   1438    828    -36   -174    214       C  
ATOM   2003  O   LEU C  28     -20.089  -0.198  -2.715  1.00 15.40           O  
ANISOU 2003  O   LEU C  28     3652   1429    771     46    -20    155       O  
ATOM   2004  CB  LEU C  28     -23.118   0.649  -1.484  1.00 14.26           C  
ANISOU 2004  CB  LEU C  28     3273   1209    937   -107   -387    303       C  
ATOM   2005  CG  LEU C  28     -22.328   1.449  -0.453  1.00 13.59           C  
ANISOU 2005  CG  LEU C  28     2996   1203    965    -53   -251    291       C  
ATOM   2006  CD1 LEU C  28     -22.980   2.736  -0.118  1.00 14.34           C  
ANISOU 2006  CD1 LEU C  28     2949   1300   1200   -101   -296    364       C  
ATOM   2007  CD2 LEU C  28     -22.077   0.665   0.820  1.00 11.64           C  
ANISOU 2007  CD2 LEU C  28     2655    974    795      2   -203    234       C  
ATOM   2008  N   ASN C  29     -21.409   1.083  -3.943  1.00 15.28           N  
ANISOU 2008  N   ASN C  29     3730   1375    701   -103   -215    281       N  
ATOM   2009  CA  ASN C  29     -20.289   1.758  -4.580  1.00 15.81           C  
ANISOU 2009  CA  ASN C  29     3829   1499    677    -77    -59    284       C  
ATOM   2010  C   ASN C  29     -20.480   3.257  -4.547  1.00 16.71           C  
ANISOU 2010  C   ASN C  29     3808   1651    890   -127    -89    379       C  
ATOM   2011  O   ASN C  29     -21.547   3.748  -4.886  1.00 18.19           O  
ANISOU 2011  O   ASN C  29     4008   1792   1110   -215   -252    454       O  
ATOM   2012  CB  ASN C  29     -20.130   1.323  -6.036  1.00 19.44           C  
ANISOU 2012  CB  ASN C  29     4569   1920    898   -111    -46    267       C  
ATOM   2013  CG  ASN C  29     -18.913   1.951  -6.680  1.00 23.27           C  
ANISOU 2013  CG  ASN C  29     5087   2465   1289    -78    147    272       C  
ATOM   2014  ND2 ASN C  29     -19.107   3.081  -7.367  1.00 26.17           N  
ANISOU 2014  ND2 ASN C  29     5472   2851   1619   -156    102    363       N  
ATOM   2015  OD1 ASN C  29     -17.805   1.444  -6.534  1.00 24.06           O  
ANISOU 2015  OD1 ASN C  29     5180   2592   1370     17    335    204       O  
ATOM   2016  N   VAL C  30     -19.442   3.984  -4.150  1.00 18.37           N  
ANISOU 2016  N   VAL C  30     3884   1932   1162    -74     59    381       N  
ATOM   2017  CA  VAL C  30     -19.522   5.434  -4.112  1.00 20.13           C  
ANISOU 2017  CA  VAL C  30     3978   2185   1484   -118     37    467       C  
ATOM   2018  C   VAL C  30     -18.494   6.047  -5.046  1.00 22.37           C  
ANISOU 2018  C   VAL C  30     4329   2516   1655   -115    165    499       C  
ATOM   2019  O   VAL C  30     -17.326   5.652  -5.049  1.00 21.84           O  
ANISOU 2019  O   VAL C  30     4271   2488   1541    -38    336    451       O  
ATOM   2020  CB  VAL C  30     -19.346   5.989  -2.678  1.00 17.14           C  
ANISOU 2020  CB  VAL C  30     3360   1841   1311    -77     71    459       C  
ATOM   2021  CG1 VAL C  30     -17.999   5.569  -2.083  1.00 16.07           C  
ANISOU 2021  CG1 VAL C  30     3164   1759   1184     15    238    398       C  
ATOM   2022  CG2 VAL C  30     -19.507   7.500  -2.669  1.00 16.05           C  
ANISOU 2022  CG2 VAL C  30     3101   1716   1283   -125     40    542       C  
ATOM   2023  N   GLN C  31     -18.954   6.995  -5.858  1.00 22.83           N  
ANISOU 2023  N   GLN C  31     4430   2563   1682   -201     79    591       N  
ATOM   2024  CA  GLN C  31     -18.083   7.743  -6.752  1.00 25.96           C  
ANISOU 2024  CA  GLN C  31     4880   3005   1980   -215    188    644       C  
ATOM   2025  C   GLN C  31     -17.949   9.148  -6.192  1.00 23.52           C  
ANISOU 2025  C   GLN C  31     4353   2729   1855   -229    178    719       C  
ATOM   2026  O   GLN C  31     -18.936   9.874  -6.077  1.00 26.25           O  
ANISOU 2026  O   GLN C  31     4629   3036   2311   -298     24    784       O  
ATOM   2027  CB  GLN C  31     -18.671   7.785  -8.161  1.00 28.19           C  
ANISOU 2027  CB  GLN C  31     5397   3246   2070   -319     86    702       C  
ATOM   2028  N   SER C  32     -16.730   9.529  -5.837  1.00 21.84           N  
ANISOU 2028  N   SER C  32     4028   2577   1693   -164    340    713       N  
ATOM   2029  CA  SER C  32     -16.521  10.731  -5.043  1.00 22.88           C  
ANISOU 2029  CA  SER C  32     3943   2732   2019   -165    332    762       C  
ATOM   2030  C   SER C  32     -15.184  11.397  -5.360  1.00 25.31           C  
ANISOU 2030  C   SER C  32     4194   3099   2322   -136    486    811       C  
ATOM   2031  O   SER C  32     -14.183  10.716  -5.556  1.00 25.00           O  
ANISOU 2031  O   SER C  32     4202   3091   2206    -70    644    773       O  
ATOM   2032  CB  SER C  32     -16.592  10.356  -3.563  1.00 22.65           C  
ANISOU 2032  CB  SER C  32     3765   2698   2144   -107    327    688       C  
ATOM   2033  OG  SER C  32     -16.431  11.488  -2.737  1.00 23.24           O  
ANISOU 2033  OG  SER C  32     3654   2781   2394   -113    315    722       O  
ATOM   2034  N   LYS C  33     -15.174  12.729  -5.420  1.00 25.91           N  
ANISOU 2034  N   LYS C  33     4163   3183   2498   -186    442    901       N  
ATOM   2035  CA  LYS C  33     -13.934  13.480  -5.636  1.00 26.95           C  
ANISOU 2035  CA  LYS C  33     4213   3367   2660   -166    573    965       C  
ATOM   2036  C   LYS C  33     -13.959  14.822  -4.923  1.00 25.45           C  
ANISOU 2036  C   LYS C  33     3827   3170   2673   -195    502   1023       C  
ATOM   2037  O   LYS C  33     -14.735  15.701  -5.286  1.00 28.06           O  
ANISOU 2037  O   LYS C  33     4150   3469   3045   -271    379   1093       O  
ATOM   2038  CB  LYS C  33     -13.671  13.701  -7.131  1.00 33.56           C  
ANISOU 2038  CB  LYS C  33     5212   4224   3314   -217    630   1042       C  
ATOM   2039  CG  LYS C  33     -12.410  14.488  -7.411  1.00 38.56           C  
ANISOU 2039  CG  LYS C  33     5755   4911   3985   -200    774   1124       C  
ATOM   2040  CD  LYS C  33     -12.198  14.690  -8.909  1.00 45.56           C  
ANISOU 2040  CD  LYS C  33     6823   5819   4670   -259    842   1203       C  
ATOM   2041  CE  LYS C  33     -11.991  13.367  -9.621  1.00 49.62           C  
ANISOU 2041  CE  LYS C  33     7562   6332   4960   -221    970   1123       C  
ATOM   2042  NZ  LYS C  33     -11.775  13.564 -11.084  1.00 55.20           N1+
ANISOU 2042  NZ  LYS C  33     8477   7056   5442   -286   1050   1195       N1+
ATOM   2043  N   PRO C  34     -13.116  14.990  -3.892  1.00 26.89           N  
ANISOU 2043  N   PRO C  34     3854   3371   2992   -139    567    999       N  
ATOM   2044  CA  PRO C  34     -12.156  14.026  -3.337  1.00 26.57           C  
ANISOU 2044  CA  PRO C  34     3789   3358   2950    -53    693    935       C  
ATOM   2045  C   PRO C  34     -12.840  12.748  -2.852  1.00 23.13           C  
ANISOU 2045  C   PRO C  34     3432   2896   2460    -21    656    827       C  
ATOM   2046  O   PRO C  34     -14.044  12.779  -2.570  1.00 21.53           O  
ANISOU 2046  O   PRO C  34     3250   2652   2278    -61    524    800       O  
ATOM   2047  CB  PRO C  34     -11.572  14.773  -2.133  1.00 26.54           C  
ANISOU 2047  CB  PRO C  34     3590   3351   3141    -42    676    947       C  
ATOM   2048  CG  PRO C  34     -11.846  16.218  -2.403  1.00 28.84           C  
ANISOU 2048  CG  PRO C  34     3815   3629   3514   -111    598   1034       C  
ATOM   2049  CD  PRO C  34     -13.149  16.239  -3.116  1.00 28.00           C  
ANISOU 2049  CD  PRO C  34     3825   3491   3323   -168    494   1039       C  
ATOM   2050  N   THR C  35     -12.088  11.653  -2.755  1.00 23.66           N  
ANISOU 2050  N   THR C  35     3533   2978   2478     52    772    773       N  
ATOM   2051  CA  THR C  35     -12.654  10.403  -2.259  1.00 21.67           C  
ANISOU 2051  CA  THR C  35     3349   2699   2185     85    736    675       C  
ATOM   2052  C   THR C  35     -13.223  10.654  -0.876  1.00 20.91           C  
ANISOU 2052  C   THR C  35     3130   2581   2234     70    625    640       C  
ATOM   2053  O   THR C  35     -12.709  11.480  -0.127  1.00 21.17           O  
ANISOU 2053  O   THR C  35     3022   2624   2399     65    622    671       O  
ATOM   2054  CB  THR C  35     -11.625   9.249  -2.207  1.00 23.74           C  
ANISOU 2054  CB  THR C  35     3632   2972   2419    171    882    629       C  
ATOM   2055  CG2 THR C  35     -11.086   8.916  -3.621  1.00 20.13           C  
ANISOU 2055  CG2 THR C  35     3323   2525   1799    191   1027    648       C  
ATOM   2056  OG1 THR C  35     -10.543   9.615  -1.344  1.00 27.22           O  
ANISOU 2056  OG1 THR C  35     3895   3431   3019    206    936    661       O  
ATOM   2057  N   ALA C  36     -14.280   9.925  -0.539  1.00 19.33           N  
ANISOU 2057  N   ALA C  36     2992   2347   2005     61    536    578       N  
ATOM   2058  CA  ALA C  36     -15.108  10.258   0.607  1.00 18.57           C  
ANISOU 2058  CA  ALA C  36     2807   2221   2027     33    434    550       C  
ATOM   2059  C   ALA C  36     -14.666   9.552   1.885  1.00 17.63           C  
ANISOU 2059  C   ALA C  36     2622   2107   1970     76    456    488       C  
ATOM   2060  O   ALA C  36     -14.017   8.506   1.840  1.00 14.17           O  
ANISOU 2060  O   ALA C  36     2223   1681   1481    129    523    457       O  
ATOM   2061  CB  ALA C  36     -16.563   9.927   0.297  1.00 19.94           C  
ANISOU 2061  CB  ALA C  36     3067   2348   2162     -8    322    536       C  
ATOM   2062  N   GLU C  37     -15.016  10.150   3.018  1.00 15.34           N  
ANISOU 2062  N   GLU C  37     2237   1799   1791     49    401    473       N  
ATOM   2063  CA  GLU C  37     -14.950   9.484   4.317  1.00 14.37           C  
ANISOU 2063  CA  GLU C  37     2080   1670   1711     64    389    413       C  
ATOM   2064  C   GLU C  37     -16.179   8.603   4.419  1.00 13.90           C  
ANISOU 2064  C   GLU C  37     2094   1580   1607     57    331    365       C  
ATOM   2065  O   GLU C  37     -17.272   9.007   4.019  1.00 15.71           O  
ANISOU 2065  O   GLU C  37     2345   1777   1846     21    271    380       O  
ATOM   2066  CB  GLU C  37     -14.989  10.521   5.452  1.00 13.99           C  
ANISOU 2066  CB  GLU C  37     1936   1604   1775     24    356    409       C  
ATOM   2067  CG  GLU C  37     -13.850  11.523   5.435  1.00 18.65           C  
ANISOU 2067  CG  GLU C  37     2443   2211   2430     17    386    466       C  
ATOM   2068  CD  GLU C  37     -14.120  12.721   6.331  1.00 25.26           C  
ANISOU 2068  CD  GLU C  37     3217   3013   3369    -33    340    459       C  
ATOM   2069  OE1 GLU C  37     -15.282  13.165   6.391  1.00 30.30           O  
ANISOU 2069  OE1 GLU C  37     3867   3612   4034    -61    304    436       O  
ATOM   2070  OE2 GLU C  37     -13.175  13.219   6.971  1.00 24.09           O1-
ANISOU 2070  OE2 GLU C  37     3006   2865   3281    -47    338    478       O1-
ATOM   2071  N   VAL C  38     -16.024   7.407   4.972  1.00 12.56           N  
ANISOU 2071  N   VAL C  38     1953   1413   1408     88    337    318       N  
ATOM   2072  CA  VAL C  38     -17.143   6.464   5.006  1.00  9.05           C  
ANISOU 2072  CA  VAL C  38     1579    936    923     83    278    281       C  
ATOM   2073  C   VAL C  38     -17.390   6.068   6.443  1.00  9.07           C  
ANISOU 2073  C   VAL C  38     1536    930    980     72    256    239       C  
ATOM   2074  O   VAL C  38     -16.466   5.629   7.128  1.00 10.94           O  
ANISOU 2074  O   VAL C  38     1744   1187   1226     93    284    225       O  
ATOM   2075  CB  VAL C  38     -16.812   5.200   4.192  1.00 12.55           C  
ANISOU 2075  CB  VAL C  38     2127   1379   1261    128    304    261       C  
ATOM   2076  CG1 VAL C  38     -17.873   4.112   4.393  1.00 10.17           C  
ANISOU 2076  CG1 VAL C  38     1894   1040    932    120    229    225       C  
ATOM   2077  CG2 VAL C  38     -16.654   5.556   2.727  1.00  9.55           C  
ANISOU 2077  CG2 VAL C  38     1829   1004    796    128    333    299       C  
ATOM   2078  N   LYS C  39     -18.627   6.248   6.907  1.00  9.49           N  
ANISOU 2078  N   LYS C  39     1580    948   1078     35    207    228       N  
ATOM   2079  CA  LYS C  39     -19.045   5.734   8.215  1.00 13.11           C  
ANISOU 2079  CA  LYS C  39     2020   1395   1566     20    195    189       C  
ATOM   2080  C   LYS C  39     -20.229   4.772   8.077  1.00 13.07           C  
ANISOU 2080  C   LYS C  39     2064   1355   1548     15    141    182       C  
ATOM   2081  O   LYS C  39     -21.110   4.986   7.246  1.00 10.50           O  
ANISOU 2081  O   LYS C  39     1758    995   1237      0     97    213       O  
ATOM   2082  CB  LYS C  39     -19.424   6.876   9.159  1.00 14.07           C  
ANISOU 2082  CB  LYS C  39     2077   1498   1771    -21    214    179       C  
ATOM   2083  CG  LYS C  39     -18.224   7.656   9.700  1.00 18.70           C  
ANISOU 2083  CG  LYS C  39     2622   2109   2374    -29    246    178       C  
ATOM   2084  CD  LYS C  39     -18.670   8.832  10.566  1.00 21.87           C  
ANISOU 2084  CD  LYS C  39     2985   2475   2848    -74    265    157       C  
ATOM   2085  CE  LYS C  39     -17.481   9.500  11.239  1.00 22.26           C  
ANISOU 2085  CE  LYS C  39     3012   2539   2908    -95    273    155       C  
ATOM   2086  NZ  LYS C  39     -16.702   8.514  12.053  1.00 22.42           N1+
ANISOU 2086  NZ  LYS C  39     3059   2585   2874    -99    253    143       N1+
ATOM   2087  N   TRP C  40     -20.261   3.744   8.926  1.00  9.06           N  
ANISOU 2087  N   TRP C  40     1571    849   1023     19    132    153       N  
ATOM   2088  CA  TRP C  40     -21.339   2.759   8.914  1.00  8.94           C  
ANISOU 2088  CA  TRP C  40     1593    797   1007     11     75    153       C  
ATOM   2089  C   TRP C  40     -22.093   2.837  10.218  1.00  9.25           C  
ANISOU 2089  C   TRP C  40     1586    821   1109    -26     91    141       C  
ATOM   2090  O   TRP C  40     -21.459   2.990  11.271  1.00  9.35           O  
ANISOU 2090  O   TRP C  40     1581    860   1113    -38    132    114       O  
ATOM   2091  CB  TRP C  40     -20.763   1.350   8.790  1.00  9.85           C  
ANISOU 2091  CB  TRP C  40     1770    920   1051     46     53    133       C  
ATOM   2092  CG  TRP C  40     -20.318   1.006   7.424  1.00 11.15           C  
ANISOU 2092  CG  TRP C  40     2012   1080   1143     83     47    137       C  
ATOM   2093  CD1 TRP C  40     -19.072   1.169   6.888  1.00 13.48           C  
ANISOU 2093  CD1 TRP C  40     2319   1406   1398    124    112    132       C  
ATOM   2094  CD2 TRP C  40     -21.129   0.431   6.404  1.00 12.20           C  
ANISOU 2094  CD2 TRP C  40     2235   1168   1232     78    -23    148       C  
ATOM   2095  CE2 TRP C  40     -20.313   0.267   5.267  1.00 10.87           C  
ANISOU 2095  CE2 TRP C  40     2152   1006    972    115     13    138       C  
ATOM   2096  CE3 TRP C  40     -22.465   0.031   6.346  1.00 12.24           C  
ANISOU 2096  CE3 TRP C  40     2260   1121   1271     41   -114    171       C  
ATOM   2097  NE1 TRP C  40     -19.062   0.720   5.587  1.00 10.79           N  
ANISOU 2097  NE1 TRP C  40     2082   1044    975    148    106    130       N  
ATOM   2098  CZ2 TRP C  40     -20.796  -0.278   4.081  1.00  9.90           C  
ANISOU 2098  CZ2 TRP C  40     2159    838    764    109    -46    140       C  
ATOM   2099  CZ3 TRP C  40     -22.939  -0.526   5.178  1.00  9.61           C  
ANISOU 2099  CZ3 TRP C  40     2039    739    872     32   -193    185       C  
ATOM   2100  CH2 TRP C  40     -22.104  -0.668   4.054  1.00 12.45           C  
ANISOU 2100  CH2 TRP C  40     2509   1106   1115     63   -161    164       C  
ATOM   2101  N   TYR C  41     -23.421   2.673  10.158  1.00 10.28           N  
ANISOU 2101  N   TYR C  41     1704    903   1301    -48     57    165       N  
ATOM   2102  CA  TYR C  41     -24.290   2.685  11.345  1.00  8.57           C  
ANISOU 2102  CA  TYR C  41     1443    662   1152    -80     94    159       C  
ATOM   2103  C   TYR C  41     -25.241   1.478  11.378  1.00  9.86           C  
ANISOU 2103  C   TYR C  41     1623    791   1334    -89     33    187       C  
ATOM   2104  O   TYR C  41     -25.637   0.983  10.336  1.00 10.24           O  
ANISOU 2104  O   TYR C  41     1703    808   1380    -81    -52    221       O  
ATOM   2105  CB  TYR C  41     -25.145   3.970  11.351  1.00  7.15           C  
ANISOU 2105  CB  TYR C  41     1191    436   1091   -101    139    179       C  
ATOM   2106  CG  TYR C  41     -24.339   5.248  11.358  1.00 11.16           C  
ANISOU 2106  CG  TYR C  41     1678    964   1599    -99    193    157       C  
ATOM   2107  CD1 TYR C  41     -24.134   5.946  12.537  1.00 11.36           C  
ANISOU 2107  CD1 TYR C  41     1686    990   1639   -121    278    111       C  
ATOM   2108  CD2 TYR C  41     -23.794   5.766  10.181  1.00 10.73           C  
ANISOU 2108  CD2 TYR C  41     1629    922   1525    -82    155    183       C  
ATOM   2109  CE1 TYR C  41     -23.393   7.118  12.556  1.00  7.42           C  
ANISOU 2109  CE1 TYR C  41     1172    500   1148   -125    312     93       C  
ATOM   2110  CE2 TYR C  41     -23.047   6.933  10.193  1.00 11.64           C  
ANISOU 2110  CE2 TYR C  41     1716   1053   1652    -84    197    173       C  
ATOM   2111  CZ  TYR C  41     -22.850   7.597  11.392  1.00 11.69           C  
ANISOU 2111  CZ  TYR C  41     1701   1055   1686   -105    269    128       C  
ATOM   2112  OH  TYR C  41     -22.128   8.760  11.431  1.00 13.89           O  
ANISOU 2112  OH  TYR C  41     1955   1338   1983   -113    297    120       O  
ATOM   2113  N   HIS C  42     -25.615   1.028  12.575  1.00  8.23           N  
ANISOU 2113  N   HIS C  42     1401    583   1142   -112     73    176       N  
ATOM   2114  CA  HIS C  42     -26.666   0.023  12.752  1.00  8.93           C  
ANISOU 2114  CA  HIS C  42     1483    632   1278   -129     26    216       C  
ATOM   2115  C   HIS C  42     -27.685   0.569  13.732  1.00 11.91           C  
ANISOU 2115  C   HIS C  42     1791    976   1760   -161    121    229       C  
ATOM   2116  O   HIS C  42     -27.354   0.848  14.890  1.00 11.38           O  
ANISOU 2116  O   HIS C  42     1735    937   1653   -182    215    187       O  
ATOM   2117  CB  HIS C  42     -26.104  -1.288  13.317  1.00  7.25           C  
ANISOU 2117  CB  HIS C  42     1326    451    980   -128    -11    199       C  
ATOM   2118  CG  HIS C  42     -27.156  -2.323  13.630  1.00 11.53           C  
ANISOU 2118  CG  HIS C  42     1855    952   1574   -151    -58    246       C  
ATOM   2119  CD2 HIS C  42     -28.311  -2.647  12.991  1.00 12.45           C  
ANISOU 2119  CD2 HIS C  42     1942   1004   1783   -160   -129    307       C  
ATOM   2120  ND1 HIS C  42     -27.059  -3.185  14.700  1.00 12.45           N  
ANISOU 2120  ND1 HIS C  42     1987   1088   1653   -175    -49    244       N  
ATOM   2121  CE1 HIS C  42     -28.112  -3.990  14.718  1.00 13.16           C  
ANISOU 2121  CE1 HIS C  42     2055   1132   1813   -194   -100    300       C  
ATOM   2122  NE2 HIS C  42     -28.884  -3.687  13.692  1.00 13.76           N  
ANISOU 2122  NE2 HIS C  42     2101   1154   1975   -185   -153    340       N  
ATOM   2123  N   ASN C  43     -28.924   0.701  13.279  1.00 11.63           N  
ANISOU 2123  N   ASN C  43     1688    871   1859   -170     97    292       N  
ATOM   2124  CA  ASN C  43     -29.984   1.271  14.106  1.00 14.52           C  
ANISOU 2124  CA  ASN C  43     1970   1187   2360   -191    210    314       C  
ATOM   2125  C   ASN C  43     -29.560   2.573  14.791  1.00 15.16           C  
ANISOU 2125  C   ASN C  43     2041   1280   2437   -192    348    250       C  
ATOM   2126  O   ASN C  43     -29.825   2.767  15.970  1.00 14.95           O  
ANISOU 2126  O   ASN C  43     2014   1248   2417   -213    476    218       O  
ATOM   2127  CB  ASN C  43     -30.482   0.247  15.134  1.00 17.93           C  
ANISOU 2127  CB  ASN C  43     2406   1620   2788   -216    244    329       C  
ATOM   2128  CG  ASN C  43     -31.251  -0.905  14.491  1.00 18.58           C  
ANISOU 2128  CG  ASN C  43     2470   1658   2931   -222    109    410       C  
ATOM   2129  ND2 ASN C  43     -31.900  -0.629  13.366  1.00 11.81           N  
ANISOU 2129  ND2 ASN C  43     1565    738   2185   -219     16    474       N  
ATOM   2130  OD1 ASN C  43     -31.239  -2.030  14.990  1.00 21.30           O  
ANISOU 2130  OD1 ASN C  43     2850   2021   3223   -237     76    420       O  
ATOM   2131  N   GLY C  44     -28.888   3.448  14.043  1.00 13.02           N  
ANISOU 2131  N   GLY C  44     1776   1022   2148   -173    322    231       N  
ATOM   2132  CA  GLY C  44     -28.552   4.782  14.522  1.00 11.42           C  
ANISOU 2132  CA  GLY C  44     1559    815   1966   -175    432    178       C  
ATOM   2133  C   GLY C  44     -27.136   4.951  15.059  1.00 11.08           C  
ANISOU 2133  C   GLY C  44     1601    843   1764   -181    449    106       C  
ATOM   2134  O   GLY C  44     -26.577   6.055  15.036  1.00 11.12           O  
ANISOU 2134  O   GLY C  44     1604    849   1772   -180    486     73       O  
ATOM   2135  N   VAL C  45     -26.552   3.856  15.539  1.00 10.65           N  
ANISOU 2135  N   VAL C  45     1614    842   1589   -192    410     92       N  
ATOM   2136  CA  VAL C  45     -25.268   3.901  16.239  1.00 11.57           C  
ANISOU 2136  CA  VAL C  45     1805   1016   1577   -211    415     41       C  
ATOM   2137  C   VAL C  45     -24.112   3.489  15.338  1.00 10.96           C  
ANISOU 2137  C   VAL C  45     1747    987   1430   -179    314     54       C  
ATOM   2138  O   VAL C  45     -24.169   2.453  14.669  1.00 11.45           O  
ANISOU 2138  O   VAL C  45     1817   1056   1476   -154    236     85       O  
ATOM   2139  CB  VAL C  45     -25.297   2.980  17.478  1.00 10.88           C  
ANISOU 2139  CB  VAL C  45     1778    949   1408   -253    438     28       C  
ATOM   2140  CG1 VAL C  45     -23.950   3.007  18.207  1.00  9.47           C  
ANISOU 2140  CG1 VAL C  45     1676    818   1106   -287    414     -8       C  
ATOM   2141  CG2 VAL C  45     -26.443   3.391  18.410  1.00  9.26           C  
ANISOU 2141  CG2 VAL C  45     1562    693   1264   -284    572     13       C  
ATOM   2142  N   GLU C  46     -23.064   4.306  15.315  1.00 10.63           N  
ANISOU 2142  N   GLU C  46     1715    970   1356   -179    321     30       N  
ATOM   2143  CA  GLU C  46     -21.923   4.060  14.442  1.00  8.62           C  
ANISOU 2143  CA  GLU C  46     1466    755   1056   -144    254     48       C  
ATOM   2144  C   GLU C  46     -21.225   2.756  14.780  1.00 11.66           C  
ANISOU 2144  C   GLU C  46     1890   1171   1368   -141    198     53       C  
ATOM   2145  O   GLU C  46     -20.977   2.466  15.938  1.00  6.85           O  
ANISOU 2145  O   GLU C  46     1315    572    716   -185    203     39       O  
ATOM   2146  CB  GLU C  46     -20.898   5.181  14.562  1.00  6.81           C  
ANISOU 2146  CB  GLU C  46     1227    540    821   -154    274     33       C  
ATOM   2147  CG  GLU C  46     -19.808   5.085  13.530  1.00 14.96           C  
ANISOU 2147  CG  GLU C  46     2244   1605   1834   -112    232     63       C  
ATOM   2148  CD  GLU C  46     -18.818   6.245  13.605  1.00 17.72           C  
ANISOU 2148  CD  GLU C  46     2569   1965   2201   -126    246     65       C  
ATOM   2149  OE1 GLU C  46     -19.133   7.272  14.256  1.00 16.56           O  
ANISOU 2149  OE1 GLU C  46     2419   1788   2086   -164    284     38       O  
ATOM   2150  OE2 GLU C  46     -17.733   6.112  13.004  1.00 16.54           O1-
ANISOU 2150  OE2 GLU C  46     2401   1843   2040    -96    225     96       O1-
ATOM   2151  N   LEU C  47     -20.866   2.001  13.754  1.00 10.09           N  
ANISOU 2151  N   LEU C  47     1697    983   1155    -93    146     75       N  
ATOM   2152  CA  LEU C  47     -20.191   0.715  13.939  1.00 10.52           C  
ANISOU 2152  CA  LEU C  47     1779   1053   1165    -79     95     82       C  
ATOM   2153  C   LEU C  47     -18.675   0.898  13.960  1.00 11.76           C  
ANISOU 2153  C   LEU C  47     1922   1238   1310    -65     92     90       C  
ATOM   2154  O   LEU C  47     -18.165   1.846  13.369  1.00 11.83           O  
ANISOU 2154  O   LEU C  47     1903   1256   1337    -48    122     95       O  
ATOM   2155  CB  LEU C  47     -20.550  -0.207  12.780  1.00  9.90           C  
ANISOU 2155  CB  LEU C  47     1727    955   1081    -30     51     94       C  
ATOM   2156  CG  LEU C  47     -22.006  -0.653  12.745  1.00  9.95           C  
ANISOU 2156  CG  LEU C  47     1741    923   1118    -48     23    107       C  
ATOM   2157  CD1 LEU C  47     -22.309  -1.406  11.439  1.00  7.33           C  
ANISOU 2157  CD1 LEU C  47     1455    560    771    -10    -40    120       C  
ATOM   2158  CD2 LEU C  47     -22.281  -1.528  13.961  1.00 13.25           C  
ANISOU 2158  CD2 LEU C  47     2167   1340   1527    -85      8    110       C  
ATOM   2159  N   GLN C  48     -17.963  -0.006  14.629  1.00 10.10           N  
ANISOU 2159  N   GLN C  48     1521   1356    960   -700   -781    215       N  
ATOM   2160  CA  GLN C  48     -16.504  -0.061  14.529  1.00 13.60           C  
ANISOU 2160  CA  GLN C  48     1759   1932   1477   -642   -799    247       C  
ATOM   2161  C   GLN C  48     -16.058  -1.467  14.096  1.00 13.62           C  
ANISOU 2161  C   GLN C  48     1747   1939   1490   -437   -793    257       C  
ATOM   2162  O   GLN C  48     -16.805  -2.445  14.264  1.00 11.62           O  
ANISOU 2162  O   GLN C  48     1652   1587   1178   -359   -823    235       O  
ATOM   2163  CB  GLN C  48     -15.852   0.297  15.874  1.00 16.11           C  
ANISOU 2163  CB  GLN C  48     2007   2299   1816   -741   -946    272       C  
ATOM   2164  N   GLU C  49     -14.859  -1.569  13.527  1.00 13.12           N  
ANISOU 2164  N   GLU C  49     1497   1976   1511   -347   -739    295       N  
ATOM   2165  CA  GLU C  49     -14.302  -2.884  13.195  1.00 18.38           C  
ANISOU 2165  CA  GLU C  49     2139   2642   2205   -145   -716    316       C  
ATOM   2166  C   GLU C  49     -14.255  -3.753  14.456  1.00 17.58           C  
ANISOU 2166  C   GLU C  49     2074   2512   2094   -103   -879    337       C  
ATOM   2167  O   GLU C  49     -13.807  -3.296  15.507  1.00 14.88           O  
ANISOU 2167  O   GLU C  49     1647   2226   1782   -201  -1013    372       O  
ATOM   2168  CB  GLU C  49     -12.882  -2.750  12.641  1.00 18.80           C  
ANISOU 2168  CB  GLU C  49     1948   2809   2385    -65   -637    377       C  
ATOM   2169  CG  GLU C  49     -12.716  -1.750  11.499  1.00 22.44           C  
ANISOU 2169  CG  GLU C  49     2344   3314   2871   -116   -474    371       C  
ATOM   2170  CD  GLU C  49     -13.264  -2.244  10.160  1.00 26.66           C  
ANISOU 2170  CD  GLU C  49     3034   3772   3322     -7   -309    327       C  
ATOM   2171  OE1 GLU C  49     -14.093  -3.176  10.141  1.00 22.85           O  
ANISOU 2171  OE1 GLU C  49     2749   3188   2746     60   -335    284       O  
ATOM   2172  OE2 GLU C  49     -12.858  -1.685   9.116  1.00 29.82           O1-
ANISOU 2172  OE2 GLU C  49     3370   4211   3748      5   -153    337       O1-
ATOM   2173  N   SER C  50     -14.703  -5.003  14.352  1.00 17.00           N  
ANISOU 2173  N   SER C  50     2138   2349   1973     37   -871    319       N  
ATOM   2174  CA  SER C  50     -14.609  -5.943  15.470  1.00 18.75           C  
ANISOU 2174  CA  SER C  50     2396   2539   2189    103  -1009    348       C  
ATOM   2175  C   SER C  50     -14.486  -7.377  14.963  1.00 17.56           C  
ANISOU 2175  C   SER C  50     2301   2327   2043    314   -943    351       C  
ATOM   2176  O   SER C  50     -14.383  -7.613  13.766  1.00 15.36           O  
ANISOU 2176  O   SER C  50     2033   2034   1769    404   -791    329       O  
ATOM   2177  CB  SER C  50     -15.828  -5.840  16.384  1.00 15.79           C  
ANISOU 2177  CB  SER C  50     2224   2061   1715    -12  -1101    309       C  
ATOM   2178  OG  SER C  50     -16.974  -6.360  15.726  1.00 12.46           O  
ANISOU 2178  OG  SER C  50     1993   1515   1226     27  -1019    252       O  
ATOM   2179  N   SER C  51     -14.527  -8.339  15.872  1.00 15.68           N  
ANISOU 2179  N   SER C  51     2123   2041   1794    390  -1049    376       N  
ATOM   2180  CA  SER C  51     -14.386  -9.723  15.451  1.00 18.18           C  
ANISOU 2180  CA  SER C  51     2498   2288   2122    592   -980    382       C  
ATOM   2181  C   SER C  51     -15.653 -10.131  14.708  1.00 19.45           C  
ANISOU 2181  C   SER C  51     2901   2310   2178    595   -894    292       C  
ATOM   2182  O   SER C  51     -15.654 -11.087  13.932  1.00 19.39           O  
ANISOU 2182  O   SER C  51     2977   2232   2160    738   -789    270       O  
ATOM   2183  CB  SER C  51     -14.111 -10.632  16.649  1.00 22.03           C  
ANISOU 2183  CB  SER C  51     2986   2757   2627    672  -1119    441       C  
ATOM   2184  OG  SER C  51     -15.188 -10.608  17.567  1.00 25.00           O  
ANISOU 2184  OG  SER C  51     3547   3046   2905    567  -1226    405       O  
ATOM   2185  N   LYS C  52     -16.722  -9.373  14.933  1.00 15.29           N  
ANISOU 2185  N   LYS C  52     2488   1740   1584    429   -936    248       N  
ATOM   2186  CA  LYS C  52     -18.008  -9.647  14.298  1.00 20.88           C  
ANISOU 2186  CA  LYS C  52     3407   2317   2211    403   -884    180       C  
ATOM   2187  C   LYS C  52     -18.256  -8.780  13.055  1.00 15.80           C  
ANISOU 2187  C   LYS C  52     2763   1697   1543    329   -774    145       C  
ATOM   2188  O   LYS C  52     -18.845  -9.241  12.084  1.00 20.01           O  
ANISOU 2188  O   LYS C  52     3436   2146   2020    367   -702     99       O  
ATOM   2189  CB  LYS C  52     -19.152  -9.444  15.294  1.00 25.49           C  
ANISOU 2189  CB  LYS C  52     4122   2812   2752    279   -985    170       C  
ATOM   2190  CG  LYS C  52     -20.526  -9.844  14.744  1.00 25.95           C  
ANISOU 2190  CG  LYS C  52     4381   2721   2757    253   -952    120       C  
ATOM   2191  CD  LYS C  52     -21.646  -9.384  15.669  1.00 24.43           C  
ANISOU 2191  CD  LYS C  52     4257   2411   2616     92   -963     76       C  
ATOM   2192  CE  LYS C  52     -23.025  -9.681  15.081  1.00 21.24           C  
ANISOU 2192  CE  LYS C  52     3993   1859   2218     36   -918      5       C  
ATOM   2193  NZ  LYS C  52     -23.362 -11.139  15.039  1.00 17.62           N1+
ANISOU 2193  NZ  LYS C  52     3660   1334   1701    143   -947    -40       N1+
ATOM   2194  N   ILE C  53     -17.798  -7.529  13.107  1.00 12.52           N  
ANISOU 2194  N   ILE C  53     2198   1391   1166    218   -769    168       N  
ATOM   2195  CA  ILE C  53     -18.063  -6.533  12.075  1.00 12.06           C  
ANISOU 2195  CA  ILE C  53     2133   1361   1088    128   -673    147       C  
ATOM   2196  C   ILE C  53     -16.789  -6.200  11.299  1.00 14.06           C  
ANISOU 2196  C   ILE C  53     2209   1730   1402    197   -561    174       C  
ATOM   2197  O   ILE C  53     -15.765  -5.810  11.879  1.00 12.42           O  
ANISOU 2197  O   ILE C  53     1807   1629   1283    191   -596    226       O  
ATOM   2198  CB  ILE C  53     -18.593  -5.210  12.702  1.00 17.19           C  
ANISOU 2198  CB  ILE C  53     2755   2033   1744    -68   -726    155       C  
ATOM   2199  CG1 ILE C  53     -19.955  -5.424  13.378  1.00 15.17           C  
ANISOU 2199  CG1 ILE C  53     2676   1644   1442   -141   -800    138       C  
ATOM   2200  CG2 ILE C  53     -18.681  -4.106  11.651  1.00 18.35           C  
ANISOU 2200  CG2 ILE C  53     2861   2223   1887   -153   -620    149       C  
ATOM   2201  CD1 ILE C  53     -21.112  -5.658  12.395  1.00 13.68           C  
ANISOU 2201  CD1 ILE C  53     2641   1338   1220   -152   -739    105       C  
ATOM   2202  N   HIS C  54     -16.854  -6.321   9.981  1.00 14.10           N  
ANISOU 2202  N   HIS C  54     2286   1709   1361    254   -427    146       N  
ATOM   2203  CA  HIS C  54     -15.719  -5.936   9.153  1.00 14.74           C  
ANISOU 2203  CA  HIS C  54     2216   1885   1500    318   -288    175       C  
ATOM   2204  C   HIS C  54     -16.200  -5.181   7.925  1.00 15.47           C  
ANISOU 2204  C   HIS C  54     2392   1966   1519    250   -176    145       C  
ATOM   2205  O   HIS C  54     -16.897  -5.735   7.078  1.00 16.11           O  
ANISOU 2205  O   HIS C  54     2675   1951   1494    289   -130     99       O  
ATOM   2206  CB  HIS C  54     -14.899  -7.172   8.756  1.00 19.25           C  
ANISOU 2206  CB  HIS C  54     2784   2432   2098    529   -194    188       C  
ATOM   2207  CG  HIS C  54     -13.704  -6.861   7.909  1.00 26.09           C  
ANISOU 2207  CG  HIS C  54     3493   3378   3042    615    -22    232       C  
ATOM   2208  CD2 HIS C  54     -13.187  -7.495   6.831  1.00 28.35           C  
ANISOU 2208  CD2 HIS C  54     3836   3623   3312    772    165    227       C  
ATOM   2209  ND1 HIS C  54     -12.882  -5.779   8.150  1.00 29.52           N  
ANISOU 2209  ND1 HIS C  54     3684   3940   3591    538    -17    291       N  
ATOM   2210  CE1 HIS C  54     -11.917  -5.755   7.249  1.00 33.21           C  
ANISOU 2210  CE1 HIS C  54     4049   4444   4124    647    168    329       C  
ATOM   2211  NE2 HIS C  54     -12.074  -6.787   6.442  1.00 33.67           N  
ANISOU 2211  NE2 HIS C  54     4292   4400   4102    794    289    291       N  
ATOM   2212  N   TYR C  55     -15.852  -3.906   7.835  1.00 16.27           N  
ANISOU 2212  N   TYR C  55     2349   2161   1673    140   -141    175       N  
ATOM   2213  CA  TYR C  55     -16.157  -3.143   6.628  1.00 13.41           C  
ANISOU 2213  CA  TYR C  55     2048   1798   1248     87    -20    161       C  
ATOM   2214  C   TYR C  55     -14.866  -2.787   5.909  1.00 17.34           C  
ANISOU 2214  C   TYR C  55     2381   2387   1821    166    145    202       C  
ATOM   2215  O   TYR C  55     -13.814  -2.635   6.544  1.00 21.51           O  
ANISOU 2215  O   TYR C  55     2687   3003   2481    190    134    254       O  
ATOM   2216  CB  TYR C  55     -17.017  -1.901   6.913  1.00 12.83           C  
ANISOU 2216  CB  TYR C  55     1978   1731   1166   -107    -83    165       C  
ATOM   2217  CG  TYR C  55     -16.578  -1.070   8.089  1.00 18.09           C  
ANISOU 2217  CG  TYR C  55     2462   2476   1935   -217   -165    199       C  
ATOM   2218  CD1 TYR C  55     -15.671  -0.029   7.929  1.00 24.65           C  
ANISOU 2218  CD1 TYR C  55     3101   3413   2852   -272    -90    237       C  
ATOM   2219  CD2 TYR C  55     -17.078  -1.319   9.361  1.00 16.02           C  
ANISOU 2219  CD2 TYR C  55     2235   2172   1678   -273   -316    193       C  
ATOM   2220  CE1 TYR C  55     -15.265   0.739   9.016  1.00 27.21           C  
ANISOU 2220  CE1 TYR C  55     3276   3800   3260   -391   -180    263       C  
ATOM   2221  CE2 TYR C  55     -16.676  -0.574  10.449  1.00 16.06           C  
ANISOU 2221  CE2 TYR C  55     2111   2238   1752   -383   -397    218       C  
ATOM   2222  CZ  TYR C  55     -15.768   0.462  10.269  1.00 23.40           C  
ANISOU 2222  CZ  TYR C  55     2854   3274   2762   -448   -337    251       C  
ATOM   2223  OH  TYR C  55     -15.371   1.220  11.351  1.00 25.04           O  
ANISOU 2223  OH  TYR C  55     2951   3534   3029   -577   -432    271       O  
ATOM   2224  N   THR C  56     -14.944  -2.687   4.585  1.00 16.58           N  
ANISOU 2224  N   THR C  56     2398   2261   1641    205    296    185       N  
ATOM   2225  CA  THR C  56     -13.775  -2.391   3.764  1.00 19.99           C  
ANISOU 2225  CA  THR C  56     2702   2757   2135    293    492    225       C  
ATOM   2226  C   THR C  56     -14.119  -1.367   2.702  1.00 16.64           C  
ANISOU 2226  C   THR C  56     2346   2340   1636    208    602    223       C  
ATOM   2227  O   THR C  56     -15.279  -1.083   2.455  1.00 16.98           O  
ANISOU 2227  O   THR C  56     2560   2327   1566    105    529    190       O  
ATOM   2228  CB  THR C  56     -13.257  -3.649   3.044  1.00 28.41           C  
ANISOU 2228  CB  THR C  56     3877   3755   3162    498    632    212       C  
ATOM   2229  CG2 THR C  56     -12.889  -4.727   4.045  1.00 32.46           C  
ANISOU 2229  CG2 THR C  56     4325   4254   3756    601    536    225       C  
ATOM   2230  OG1 THR C  56     -14.276  -4.143   2.165  1.00 30.56           O  
ANISOU 2230  OG1 THR C  56     4457   3910   3243    503    646    143       O  
ATOM   2231  N   ASN C  57     -13.096  -0.841   2.046  1.00 20.88           N  
ANISOU 2231  N   ASN C  57     2746   2941   2245    257    783    269       N  
ATOM   2232  CA  ASN C  57     -13.276   0.189   1.037  1.00 20.65           C  
ANISOU 2232  CA  ASN C  57     2764   2926   2156    184    906    279       C  
ATOM   2233  C   ASN C  57     -12.249  -0.072  -0.043  1.00 23.06           C  
ANISOU 2233  C   ASN C  57     3062   3230   2470    339   1157    307       C  
ATOM   2234  O   ASN C  57     -11.052   0.028   0.198  1.00 23.32           O  
ANISOU 2234  O   ASN C  57     2854   3332   2674    408   1252    368       O  
ATOM   2235  CB  ASN C  57     -13.076   1.570   1.660  1.00 24.65           C  
ANISOU 2235  CB  ASN C  57     3048   3531   2788     23    860    324       C  
ATOM   2236  CG  ASN C  57     -13.239   2.707   0.657  1.00 32.24           C  
ANISOU 2236  CG  ASN C  57     4041   4506   3700    -54    995    345       C  
ATOM   2237  ND2 ASN C  57     -13.434   3.913   1.172  1.00 33.96           N  
ANISOU 2237  ND2 ASN C  57     4134   4778   3992   -217    937    370       N  
ATOM   2238  OD1 ASN C  57     -13.176   2.509  -0.559  1.00 33.21           O  
ANISOU 2238  OD1 ASN C  57     4313   4588   3718     32   1155    341       O  
ATOM   2239  N   THR C  58     -12.716  -0.443  -1.226  1.00 24.99           N  
ANISOU 2239  N   THR C  58     3578   3385   2532    396   1264    267       N  
ATOM   2240  CA  THR C  58     -11.818  -0.778  -2.320  1.00 31.52           C  
ANISOU 2240  CA  THR C  58     4459   4182   3336    555   1530    286       C  
ATOM   2241  C   THR C  58     -12.085   0.148  -3.484  1.00 29.86           C  
ANISOU 2241  C   THR C  58     4375   3965   3006    492   1660    295       C  
ATOM   2242  O   THR C  58     -12.972  -0.110  -4.296  1.00 31.68           O  
ANISOU 2242  O   THR C  58     4908   4108   3022    473   1644    245       O  
ATOM   2243  CB  THR C  58     -12.015  -2.228  -2.787  1.00 33.69           C  
ANISOU 2243  CB  THR C  58     5001   4329   3470    704   1574    226       C  
ATOM   2244  CG2 THR C  58     -10.974  -2.600  -3.821  1.00 36.32           C  
ANISOU 2244  CG2 THR C  58     5384   4619   3799    883   1881    252       C  
ATOM   2245  OG1 THR C  58     -11.910  -3.109  -1.662  1.00 39.16           O  
ANISOU 2245  OG1 THR C  58     5596   5020   4264    756   1433    219       O  
ATOM   2246  N   SER C  59     -11.322   1.231  -3.550  1.00 31.50           N  
ANISOU 2246  N   SER C  59     4350   4263   3353    452   1779    364       N  
ATOM   2247  CA  SER C  59     -11.484   2.226  -4.606  1.00 32.40           C  
ANISOU 2247  CA  SER C  59     4555   4380   3375    391   1916    387       C  
ATOM   2248  C   SER C  59     -12.948   2.592  -4.835  1.00 32.06           C  
ANISOU 2248  C   SER C  59     4738   4296   3149    245   1743    347       C  
ATOM   2249  O   SER C  59     -13.388   2.748  -5.976  1.00 35.15           O  
ANISOU 2249  O   SER C  59     5371   4629   3356    244   1828    340       O  
ATOM   2250  CB  SER C  59     -10.866   1.725  -5.909  1.00 36.63           C  
ANISOU 2250  CB  SER C  59     5272   4840   3804    557   2198    391       C  
ATOM   2251  OG  SER C  59      -9.523   1.328  -5.698  1.00 40.51           O  
ANISOU 2251  OG  SER C  59     5541   5358   4492    707   2372    444       O  
ATOM   2252  N   GLY C  60     -13.697   2.724  -3.747  1.00 26.81           N  
ANISOU 2252  N   GLY C  60     3997   3654   2537    123   1502    331       N  
ATOM   2253  CA  GLY C  60     -15.082   3.145  -3.825  1.00 26.13           C  
ANISOU 2253  CA  GLY C  60     4071   3528   2329    -21   1336    316       C  
ATOM   2254  C   GLY C  60     -16.106   2.041  -3.605  1.00 24.89           C  
ANISOU 2254  C   GLY C  60     4132   3276   2049    -15   1150    254       C  
ATOM   2255  O   GLY C  60     -17.279   2.323  -3.370  1.00 21.35           O  
ANISOU 2255  O   GLY C  60     3763   2797   1554   -141    978    254       O  
ATOM   2256  N   VAL C  61     -15.680   0.783  -3.713  1.00 24.45           N  
ANISOU 2256  N   VAL C  61     4176   3163   1949    133   1196    208       N  
ATOM   2257  CA  VAL C  61     -16.582  -0.331  -3.446  1.00 20.09           C  
ANISOU 2257  CA  VAL C  61     3822   2514   1296    141   1024    147       C  
ATOM   2258  C   VAL C  61     -16.586  -0.562  -1.942  1.00 18.74           C  
ANISOU 2258  C   VAL C  61     3450   2381   1288    114    867    147       C  
ATOM   2259  O   VAL C  61     -15.568  -0.925  -1.364  1.00 20.15           O  
ANISOU 2259  O   VAL C  61     3452   2606   1596    212    929    158       O  
ATOM   2260  CB  VAL C  61     -16.152  -1.624  -4.183  1.00 20.65           C  
ANISOU 2260  CB  VAL C  61     4112   2490   1244    311   1148     94       C  
ATOM   2261  CG1 VAL C  61     -17.086  -2.790  -3.827  1.00 18.75           C  
ANISOU 2261  CG1 VAL C  61     4067   2142    914    310    962     29       C  
ATOM   2262  CG2 VAL C  61     -16.097  -1.393  -5.705  1.00 20.92           C  
ANISOU 2262  CG2 VAL C  61     4384   2475   1091    340   1321     93       C  
ATOM   2263  N   LEU C  62     -17.721  -0.322  -1.302  1.00 14.74           N  
ANISOU 2263  N   LEU C  62     2967   1852    782    -21    668    144       N  
ATOM   2264  CA  LEU C  62     -17.793  -0.449   0.148  1.00 13.35           C  
ANISOU 2264  CA  LEU C  62     2626   1702    743    -60    525    146       C  
ATOM   2265  C   LEU C  62     -18.496  -1.743   0.519  1.00 18.21           C  
ANISOU 2265  C   LEU C  62     3410   2214   1295    -14    390     94       C  
ATOM   2266  O   LEU C  62     -19.579  -2.028   0.014  1.00 19.06           O  
ANISOU 2266  O   LEU C  62     3729   2231   1282    -66    304     73       O  
ATOM   2267  CB  LEU C  62     -18.566   0.733   0.731  1.00 12.84           C  
ANISOU 2267  CB  LEU C  62     2470   1668    742   -238    421    185       C  
ATOM   2268  CG  LEU C  62     -18.171   2.111   0.184  1.00 13.98           C  
ANISOU 2268  CG  LEU C  62     2499   1890    922   -311    548    237       C  
ATOM   2269  CD1 LEU C  62     -18.990   3.205   0.849  1.00 12.14           C  
ANISOU 2269  CD1 LEU C  62     2190   1665    758   -482    452    275       C  
ATOM   2270  CD2 LEU C  62     -16.670   2.353   0.367  1.00 17.35           C  
ANISOU 2270  CD2 LEU C  62     2703   2416   1475   -236    688    257       C  
ATOM   2271  N   THR C  63     -17.893  -2.526   1.406  1.00 14.74           N  
ANISOU 2271  N   THR C  63     2873   1785    943     78    363     81       N  
ATOM   2272  CA  THR C  63     -18.549  -3.736   1.873  1.00 16.50           C  
ANISOU 2272  CA  THR C  63     3243   1906   1122    119    238     36       C  
ATOM   2273  C   THR C  63     -18.613  -3.748   3.399  1.00 18.88           C  
ANISOU 2273  C   THR C  63     3387   2237   1551     76     99     54       C  
ATOM   2274  O   THR C  63     -17.694  -3.275   4.076  1.00 17.12           O  
ANISOU 2274  O   THR C  63     2942   2114   1450     83    124     90       O  
ATOM   2275  CB  THR C  63     -17.835  -5.009   1.375  1.00 21.74           C  
ANISOU 2275  CB  THR C  63     4014   2513   1732    306    349     -1       C  
ATOM   2276  CG2 THR C  63     -17.696  -4.988  -0.129  1.00 17.20           C  
ANISOU 2276  CG2 THR C  63     3623   1899   1014    352    508    -22       C  
ATOM   2277  OG1 THR C  63     -16.531  -5.095   1.956  1.00 31.19           O  
ANISOU 2277  OG1 THR C  63     4980   3795   3074    412    435     36       O  
ATOM   2278  N   LEU C  64     -19.724  -4.248   3.930  1.00 14.92           N  
ANISOU 2278  N   LEU C  64     3008   1643   1019     21    -50     33       N  
ATOM   2279  CA  LEU C  64     -19.857  -4.464   5.358  1.00 13.56           C  
ANISOU 2279  CA  LEU C  64     2742   1471    940     -4   -173     44       C  
ATOM   2280  C   LEU C  64     -20.210  -5.926   5.562  1.00 16.31           C  
ANISOU 2280  C   LEU C  64     3246   1708   1242     97   -235      3       C  
ATOM   2281  O   LEU C  64     -21.227  -6.401   5.052  1.00 19.12           O  
ANISOU 2281  O   LEU C  64     3799   1954   1511     66   -288    -27       O  
ATOM   2282  CB  LEU C  64     -20.973  -3.603   5.947  1.00 10.76           C  
ANISOU 2282  CB  LEU C  64     2386   1090    614   -175   -279     70       C  
ATOM   2283  CG  LEU C  64     -21.322  -3.921   7.408  1.00 14.82           C  
ANISOU 2283  CG  LEU C  64     2867   1568   1195   -204   -401     76       C  
ATOM   2284  CD1 LEU C  64     -20.227  -3.457   8.352  1.00 10.65           C  
ANISOU 2284  CD1 LEU C  64     2136   1152    759   -201   -398    101       C  
ATOM   2285  CD2 LEU C  64     -22.664  -3.277   7.826  1.00 13.17           C  
ANISOU 2285  CD2 LEU C  64     2694   1261   1048   -357   -463    101       C  
ATOM   2286  N  AGLU C  65     -19.360  -6.631   6.299  0.49 14.86           N  
ANISOU 2286  N  AGLU C  65     2970   1551   1125    212   -233      8       N  
ATOM   2287  N  BGLU C  65     -19.377  -6.635   6.314  0.51 14.76           N  
ANISOU 2287  N  BGLU C  65     2959   1538   1113    211   -236      8       N  
ATOM   2288  CA AGLU C  65     -19.607  -8.020   6.640  0.49 16.63           C  
ANISOU 2288  CA AGLU C  65     3324   1671   1323    315   -285    -24       C  
ATOM   2289  CA BGLU C  65     -19.610  -8.042   6.611  0.51 16.68           C  
ANISOU 2289  CA BGLU C  65     3335   1674   1327    317   -283    -25       C  
ATOM   2290  C  AGLU C  65     -20.087  -8.095   8.077  0.49 16.31           C  
ANISOU 2290  C  AGLU C  65     3235   1612   1350    255   -431     -3       C  
ATOM   2291  C  BGLU C  65     -20.020  -8.186   8.071  0.51 16.41           C  
ANISOU 2291  C  BGLU C  65     3249   1624   1363    269   -427     -4       C  
ATOM   2292  O  AGLU C  65     -19.547  -7.422   8.955  0.49 15.19           O  
ANISOU 2292  O  AGLU C  65     2916   1565   1291    212   -465     39       O  
ATOM   2293  O  BGLU C  65     -19.365  -7.644   8.962  0.51 15.92           O  
ANISOU 2293  O  BGLU C  65     3004   1657   1386    247   -457     38       O  
ATOM   2294  CB AGLU C  65     -18.331  -8.853   6.471  0.49 19.37           C  
ANISOU 2294  CB AGLU C  65     3611   2044   1703    504   -170    -19       C  
ATOM   2295  CB BGLU C  65     -18.346  -8.863   6.328  0.51 19.28           C  
ANISOU 2295  CB BGLU C  65     3615   2028   1681    507   -158    -23       C  
ATOM   2296  CG AGLU C  65     -18.477 -10.315   6.885  0.49 21.37           C  
ANISOU 2296  CG AGLU C  65     3988   2188   1943    626   -209    -44       C  
ATOM   2297  CG BGLU C  65     -18.481 -10.366   6.572  0.51 21.27           C  
ANISOU 2297  CG BGLU C  65     4011   2164   1908    636   -180    -54       C  
ATOM   2298  CD AGLU C  65     -17.218 -11.125   6.629  0.49 25.07           C  
ANISOU 2298  CD AGLU C  65     4398   2671   2457    824    -69    -26       C  
ATOM   2299  CD BGLU C  65     -19.123 -11.107   5.409  0.51 23.16           C  
ANISOU 2299  CD BGLU C  65     4526   2269   2006    666   -126   -123       C  
ATOM   2300  OE1AGLU C  65     -16.217 -10.941   7.355  0.49 25.37           O  
ANISOU 2300  OE1AGLU C  65     4207   2812   2622    878    -69     40       O  
ATOM   2301  OE1BGLU C  65     -18.991 -10.652   4.253  0.51 24.22           O  
ANISOU 2301  OE1BGLU C  65     4728   2415   2061    653    -18   -140       O  
ATOM   2302  OE2AGLU C  65     -17.228 -11.950   5.694  0.49 32.52           O1-
ANISOU 2302  OE2AGLU C  65     5529   3515   3313    925     42    -73       O1-
ATOM   2303  OE2BGLU C  65     -19.762 -12.154   5.654  0.51 24.22           O1-
ANISOU 2303  OE2BGLU C  65     4821   2278   2102    698   -195   -159       O1-
ATOM   2304  N   ILE C  66     -21.116  -8.902   8.309  1.00 13.94           N  
ANISOU 2304  N   ILE C  66     2444   1414   1439   -133   -312   -243       N  
ATOM   2305  CA  ILE C  66     -21.596  -9.158   9.655  1.00 14.27           C  
ANISOU 2305  CA  ILE C  66     2404   1440   1578   -169   -247   -183       C  
ATOM   2306  C   ILE C  66     -21.556 -10.671   9.848  1.00 14.57           C  
ANISOU 2306  C   ILE C  66     2462   1408   1667   -174   -299   -184       C  
ATOM   2307  O   ILE C  66     -22.250 -11.403   9.133  1.00 13.83           O  
ANISOU 2307  O   ILE C  66     2381   1226   1650   -194   -419   -200       O  
ATOM   2308  CB  ILE C  66     -23.052  -8.671   9.834  1.00 16.85           C  
ANISOU 2308  CB  ILE C  66     2639   1733   2031   -213   -269   -122       C  
ATOM   2309  CG1 ILE C  66     -23.198  -7.219   9.372  1.00 17.96           C  
ANISOU 2309  CG1 ILE C  66     2772   1919   2134   -202   -242   -125       C  
ATOM   2310  CG2 ILE C  66     -23.500  -8.852  11.290  1.00 16.51           C  
ANISOU 2310  CG2 ILE C  66     2500   1702   2070   -233   -186    -47       C  
ATOM   2311  CD1 ILE C  66     -24.601  -6.858   8.925  1.00 19.93           C  
ANISOU 2311  CD1 ILE C  66     2962   2127   2483   -231   -309    -84       C  
ATOM   2312  N   LEU C  67     -20.738 -11.152  10.785  1.00 12.73           N  
ANISOU 2312  N   LEU C  67     2229   1210   1397   -153   -217   -171       N  
ATOM   2313  CA  LEU C  67     -20.594 -12.606  10.975  1.00 12.62           C  
ANISOU 2313  CA  LEU C  67     2239   1122   1436   -150   -260   -165       C  
ATOM   2314  C   LEU C  67     -21.610 -13.155  11.978  1.00 14.23           C  
ANISOU 2314  C   LEU C  67     2336   1271   1799   -198   -246    -63       C  
ATOM   2315  O   LEU C  67     -21.971 -12.475  12.937  1.00 16.60           O  
ANISOU 2315  O   LEU C  67     2548   1640   2120   -208   -153      2       O  
ATOM   2316  CB  LEU C  67     -19.177 -12.983  11.445  1.00 11.85           C  
ANISOU 2316  CB  LEU C  67     2193   1092   1217    -94   -180   -189       C  
ATOM   2317  CG  LEU C  67     -17.933 -12.629  10.619  1.00 13.29           C  
ANISOU 2317  CG  LEU C  67     2471   1347   1232    -36   -176   -268       C  
ATOM   2318  CD1 LEU C  67     -16.672 -13.143  11.328  1.00 12.39           C  
ANISOU 2318  CD1 LEU C  67     2360   1296   1052     15    -87   -237       C  
ATOM   2319  CD2 LEU C  67     -18.018 -13.231   9.234  1.00 16.38           C  
ANISOU 2319  CD2 LEU C  67     2936   1670   1617     -6   -307   -321       C  
ATOM   2320  N   ASP C  68     -22.073 -14.381  11.740  1.00 16.01           N  
ANISOU 2320  N   ASP C  68     2566   1375   2142   -224   -341    -49       N  
ATOM   2321  CA  ASP C  68     -22.895 -15.112  12.709  1.00 17.50           C  
ANISOU 2321  CA  ASP C  68     2650   1507   2493   -268   -326     68       C  
ATOM   2322  C   ASP C  68     -24.085 -14.272  13.141  1.00 15.29           C  
ANISOU 2322  C   ASP C  68     2253   1262   2293   -310   -298    149       C  
ATOM   2323  O   ASP C  68     -24.223 -13.940  14.321  1.00 15.23           O  
ANISOU 2323  O   ASP C  68     2155   1340   2292   -300   -184    237       O  
ATOM   2324  CB  ASP C  68     -22.053 -15.475  13.933  1.00 13.84           C  
ANISOU 2324  CB  ASP C  68     2163   1117   1981   -226   -198    127       C  
ATOM   2325  CG  ASP C  68     -22.659 -16.591  14.767  1.00 16.26           C  
ANISOU 2325  CG  ASP C  68     2380   1347   2453   -256   -195    253       C  
ATOM   2326  OD1 ASP C  68     -23.846 -16.935  14.582  1.00 17.22           O  
ANISOU 2326  OD1 ASP C  68     2434   1369   2741   -321   -278    313       O  
ATOM   2327  OD2 ASP C  68     -21.921 -17.116  15.625  1.00 16.90           O1-
ANISOU 2327  OD2 ASP C  68     2452   1473   2497   -213   -108    301       O1-
ATOM   2328  N   CYS C  69     -24.940 -13.938  12.177  1.00 16.43           N  
ANISOU 2328  N   CYS C  69     2398   1353   2490   -348   -403    117       N  
ATOM   2329  CA  CYS C  69     -26.103 -13.083  12.419  1.00 12.81           C  
ANISOU 2329  CA  CYS C  69     1836    930   2101   -381   -388    186       C  
ATOM   2330  C   CYS C  69     -27.089 -13.674  13.421  1.00 13.05           C  
ANISOU 2330  C   CYS C  69     1731    933   2296   -424   -365    330       C  
ATOM   2331  O   CYS C  69     -27.558 -14.815  13.272  1.00 16.74           O  
ANISOU 2331  O   CYS C  69     2174   1281   2906   -474   -455    371       O  
ATOM   2332  CB  CYS C  69     -26.829 -12.776  11.097  1.00 13.83           C  
ANISOU 2332  CB  CYS C  69     1992   1003   2258   -410   -520    126       C  
ATOM   2333  SG  CYS C  69     -25.866 -11.798   9.914  1.00 16.18           S  
ANISOU 2333  SG  CYS C  69     2419   1367   2363   -350   -530     -6       S  
ATOM   2334  N   HIS C  70     -27.400 -12.881  14.441  1.00 17.09           N  
ANISOU 2334  N   HIS C  70     2148   1556   2788   -401   -247    409       N  
ATOM   2335  CA  HIS C  70     -28.448 -13.202  15.403  1.00 16.02           C  
ANISOU 2335  CA  HIS C  70     1863   1434   2791   -428   -211    564       C  
ATOM   2336  C   HIS C  70     -29.579 -12.199  15.189  1.00 16.38           C  
ANISOU 2336  C   HIS C  70     1835   1516   2872   -443   -226    593       C  
ATOM   2337  O   HIS C  70     -29.438 -11.248  14.409  1.00 14.29           O  
ANISOU 2337  O   HIS C  70     1639   1271   2520   -427   -248    496       O  
ATOM   2338  CB  HIS C  70     -27.920 -13.097  16.835  1.00 14.46           C  
ANISOU 2338  CB  HIS C  70     1605   1363   2526   -365    -56    635       C  
ATOM   2339  CG  HIS C  70     -26.980 -14.198  17.226  1.00 16.46           C  
ANISOU 2339  CG  HIS C  70     1899   1587   2768   -348    -31    647       C  
ATOM   2340  CD2 HIS C  70     -27.003 -15.065  18.270  1.00 17.47           C  
ANISOU 2340  CD2 HIS C  70     1940   1734   2965   -335     33    779       C  
ATOM   2341  ND1 HIS C  70     -25.834 -14.493  16.519  1.00 19.44           N  
ANISOU 2341  ND1 HIS C  70     2418   1920   3050   -331    -68    523       N  
ATOM   2342  CE1 HIS C  70     -25.204 -15.503  17.094  1.00 20.99           C  
ANISOU 2342  CE1 HIS C  70     2617   2099   3258   -310    -32    570       C  
ATOM   2343  NE2 HIS C  70     -25.902 -15.871  18.159  1.00 17.53           N  
ANISOU 2343  NE2 HIS C  70     2040   1695   2924   -314     30    729       N  
ATOM   2344  N   THR C  71     -30.690 -12.405  15.887  1.00 15.03           N  
ANISOU 2344  N   THR C  71     1519   1362   2830   -468   -208    737       N  
ATOM   2345  CA  THR C  71     -31.866 -11.553  15.739  1.00 17.77           C  
ANISOU 2345  CA  THR C  71     1780   1748   3223   -478   -223    783       C  
ATOM   2346  C   THR C  71     -31.591 -10.067  15.998  1.00 17.82           C  
ANISOU 2346  C   THR C  71     1808   1877   3084   -402   -125    722       C  
ATOM   2347  O   THR C  71     -32.152  -9.208  15.326  1.00 18.45           O  
ANISOU 2347  O   THR C  71     1894   1958   3157   -404   -164    687       O  
ATOM   2348  CB  THR C  71     -32.979 -11.994  16.679  1.00 21.51           C  
ANISOU 2348  CB  THR C  71     2079   2255   3839   -498   -190    969       C  
ATOM   2349  CG2 THR C  71     -34.173 -11.047  16.543  1.00 24.30           C  
ANISOU 2349  CG2 THR C  71     2342   2665   4225   -495   -198   1017       C  
ATOM   2350  OG1 THR C  71     -33.378 -13.327  16.335  1.00 30.48           O  
ANISOU 2350  OG1 THR C  71     3184   3252   5146   -585   -300   1032       O  
ATOM   2351  N   ASP C  72     -30.750  -9.765  16.983  1.00 14.05           N  
ANISOU 2351  N   ASP C  72     1339   1501   2499   -333      0    709       N  
ATOM   2352  CA  ASP C  72     -30.411  -8.363  17.269  1.00 15.81           C  
ANISOU 2352  CA  ASP C  72     1586   1826   2597   -262     86    635       C  
ATOM   2353  C   ASP C  72     -29.574  -7.684  16.183  1.00 21.04           C  
ANISOU 2353  C   ASP C  72     2390   2443   3160   -264     43    487       C  
ATOM   2354  O   ASP C  72     -29.306  -6.479  16.260  1.00 19.47           O  
ANISOU 2354  O   ASP C  72     2217   2302   2881   -217     98    423       O  
ATOM   2355  CB  ASP C  72     -29.752  -8.216  18.644  1.00 18.83           C  
ANISOU 2355  CB  ASP C  72     1928   2337   2889   -184    221    650       C  
ATOM   2356  CG  ASP C  72     -28.471  -9.015  18.772  1.00 26.00           C  
ANISOU 2356  CG  ASP C  72     2916   3231   3730   -182    239    603       C  
ATOM   2357  OD1 ASP C  72     -28.359 -10.094  18.159  1.00 27.53           O  
ANISOU 2357  OD1 ASP C  72     3152   3317   3992   -240    157    617       O  
ATOM   2358  OD2 ASP C  72     -27.568  -8.563  19.498  1.00 28.86           O1-
ANISOU 2358  OD2 ASP C  72     3299   3694   3972   -118    332    546       O1-
ATOM   2359  N   ASP C  73     -29.148  -8.444  15.174  1.00 17.90           N  
ANISOU 2359  N   ASP C  73     2083   1947   2773   -312    -55    435       N  
ATOM   2360  CA  ASP C  73     -28.432  -7.838  14.050  1.00 13.26           C  
ANISOU 2360  CA  ASP C  73     1618   1330   2091   -307    -99    315       C  
ATOM   2361  C   ASP C  73     -29.400  -7.296  12.997  1.00 13.49           C  
ANISOU 2361  C   ASP C  73     1638   1316   2172   -333   -190    314       C  
ATOM   2362  O   ASP C  73     -28.982  -6.603  12.066  1.00 14.72           O  
ANISOU 2362  O   ASP C  73     1875   1464   2253   -319   -219    237       O  
ATOM   2363  CB  ASP C  73     -27.440  -8.818  13.409  1.00 12.70           C  
ANISOU 2363  CB  ASP C  73     1653   1196   1976   -321   -159    247       C  
ATOM   2364  CG  ASP C  73     -26.332  -9.244  14.365  1.00 14.32           C  
ANISOU 2364  CG  ASP C  73     1878   1456   2107   -285    -64    240       C  
ATOM   2365  OD1 ASP C  73     -25.769  -8.373  15.043  1.00 14.11           O  
ANISOU 2365  OD1 ASP C  73     1846   1524   1991   -239     39    214       O  
ATOM   2366  OD2 ASP C  73     -26.026 -10.456  14.443  1.00 14.93           O1-
ANISOU 2366  OD2 ASP C  73     1973   1481   2220   -300    -95    259       O1-
ATOM   2367  N   SER C  74     -30.685  -7.617  13.141  1.00 13.78           N  
ANISOU 2367  N   SER C  74     1570   1331   2336   -368   -234    409       N  
ATOM   2368  CA  SER C  74     -31.711  -7.094  12.238  1.00 14.70           C  
ANISOU 2368  CA  SER C  74     1658   1423   2505   -389   -316    421       C  
ATOM   2369  C   SER C  74     -31.791  -5.580  12.381  1.00 18.13           C  
ANISOU 2369  C   SER C  74     2086   1928   2873   -331   -236    406       C  
ATOM   2370  O   SER C  74     -31.284  -5.002  13.351  1.00 15.90           O  
ANISOU 2370  O   SER C  74     1795   1714   2533   -281   -121    398       O  
ATOM   2371  CB  SER C  74     -33.084  -7.718  12.538  1.00 14.30           C  
ANISOU 2371  CB  SER C  74     1474   1350   2610   -439   -367    543       C  
ATOM   2372  OG  SER C  74     -33.048  -9.132  12.386  1.00 17.48           O  
ANISOU 2372  OG  SER C  74     1878   1662   3101   -500   -452    558       O  
ATOM   2373  N   GLY C  75     -32.432  -4.932  11.422  1.00 16.25           N  
ANISOU 2373  N   GLY C  75     1851   1674   2648   -334   -300    399       N  
ATOM   2374  CA  GLY C  75     -32.615  -3.500  11.512  1.00 16.28           C  
ANISOU 2374  CA  GLY C  75     1845   1729   2613   -279   -231    395       C  
ATOM   2375  C   GLY C  75     -32.020  -2.750  10.343  1.00 18.38           C  
ANISOU 2375  C   GLY C  75     2211   1974   2799   -261   -264    319       C  
ATOM   2376  O   GLY C  75     -31.768  -3.319   9.272  1.00 17.17           O  
ANISOU 2376  O   GLY C  75     2120   1780   2622   -287   -361    278       O  
ATOM   2377  N   THR C  76     -31.803  -1.458  10.561  1.00 14.09           N  
ANISOU 2377  N   THR C  76     1678   1461   2216   -209   -183    302       N  
ATOM   2378  CA  THR C  76     -31.397  -0.547   9.511  1.00 16.26           C  
ANISOU 2378  CA  THR C  76     2022   1720   2435   -186   -200    263       C  
ATOM   2379  C   THR C  76     -29.903  -0.314   9.539  1.00 15.14           C  
ANISOU 2379  C   THR C  76     1974   1579   2198   -173   -147    187       C  
ATOM   2380  O   THR C  76     -29.343   0.088  10.559  1.00 14.71           O  
ANISOU 2380  O   THR C  76     1915   1549   2125   -151    -53    160       O  
ATOM   2381  CB  THR C  76     -32.104   0.807   9.671  1.00 17.36           C  
ANISOU 2381  CB  THR C  76     2112   1873   2611   -138   -149    301       C  
ATOM   2382  CG2 THR C  76     -31.672   1.777   8.578  1.00 20.19           C  
ANISOU 2382  CG2 THR C  76     2537   2211   2925   -112   -161    281       C  
ATOM   2383  OG1 THR C  76     -33.521   0.605   9.612  1.00 16.32           O  
ANISOU 2383  OG1 THR C  76     1885   1753   2563   -146   -199    381       O  
ATOM   2384  N   TYR C  77     -29.260  -0.570   8.409  1.00 13.63           N  
ANISOU 2384  N   TYR C  77     1862   1374   1942   -180   -209    151       N  
ATOM   2385  CA  TYR C  77     -27.853  -0.258   8.249  1.00 11.35           C  
ANISOU 2385  CA  TYR C  77     1656   1097   1560   -165   -163     95       C  
ATOM   2386  C   TYR C  77     -27.739   0.949   7.342  1.00 13.79           C  
ANISOU 2386  C   TYR C  77     1988   1402   1848   -134   -158    111       C  
ATOM   2387  O   TYR C  77     -28.422   1.034   6.323  1.00 13.65           O  
ANISOU 2387  O   TYR C  77     1963   1384   1839   -124   -232    146       O  
ATOM   2388  CB  TYR C  77     -27.098  -1.467   7.688  1.00 11.06           C  
ANISOU 2388  CB  TYR C  77     1688   1060   1453   -181   -227     50       C  
ATOM   2389  CG  TYR C  77     -26.981  -2.561   8.721  1.00 15.36           C  
ANISOU 2389  CG  TYR C  77     2213   1600   2022   -207   -209     41       C  
ATOM   2390  CD1 TYR C  77     -25.879  -2.623   9.567  1.00 13.60           C  
ANISOU 2390  CD1 TYR C  77     2018   1408   1743   -197   -124      3       C  
ATOM   2391  CD2 TYR C  77     -27.995  -3.506   8.883  1.00 17.47           C  
ANISOU 2391  CD2 TYR C  77     2424   1837   2378   -240   -274     80       C  
ATOM   2392  CE1 TYR C  77     -25.775  -3.609  10.534  1.00 11.72           C  
ANISOU 2392  CE1 TYR C  77     1754   1176   1523   -211   -100      9       C  
ATOM   2393  CE2 TYR C  77     -27.903  -4.505   9.847  1.00 16.22           C  
ANISOU 2393  CE2 TYR C  77     2237   1673   2254   -262   -251     93       C  
ATOM   2394  CZ  TYR C  77     -26.790  -4.542  10.671  1.00 12.42           C  
ANISOU 2394  CZ  TYR C  77     1786   1229   1704   -242   -161     60       C  
ATOM   2395  OH  TYR C  77     -26.686  -5.510  11.635  1.00 14.14           O  
ANISOU 2395  OH  TYR C  77     1970   1451   1950   -254   -131     86       O  
ATOM   2396  N   ARG C  78     -26.885   1.886   7.732  1.00 14.14           N  
ANISOU 2396  N   ARG C  78     2054   1447   1872   -118    -74     89       N  
ATOM   2397  CA  ARG C  78     -26.678   3.111   6.988  1.00 13.14           C  
ANISOU 2397  CA  ARG C  78     1943   1305   1745    -91    -56    119       C  
ATOM   2398  C   ARG C  78     -25.200   3.334   6.704  1.00 12.45           C  
ANISOU 2398  C   ARG C  78     1919   1232   1579    -91    -20     89       C  
ATOM   2399  O   ARG C  78     -24.363   3.271   7.611  1.00 13.27           O  
ANISOU 2399  O   ARG C  78     2034   1342   1665   -106     40     36       O  
ATOM   2400  CB  ARG C  78     -27.225   4.315   7.769  1.00 13.08           C  
ANISOU 2400  CB  ARG C  78     1881   1262   1827    -70     13    133       C  
ATOM   2401  CG  ARG C  78     -27.091   5.651   7.021  1.00 13.35           C  
ANISOU 2401  CG  ARG C  78     1925   1259   1890    -43     33    177       C  
ATOM   2402  CD  ARG C  78     -27.578   6.818   7.887  1.00 13.69           C  
ANISOU 2402  CD  ARG C  78     1921   1251   2030    -15     99    173       C  
ATOM   2403  NE  ARG C  78     -27.538   8.095   7.174  1.00 11.72           N  
ANISOU 2403  NE  ARG C  78     1675    946   1831     11    116    227       N  
ATOM   2404  CZ  ARG C  78     -27.235   9.250   7.750  1.00 14.02           C  
ANISOU 2404  CZ  ARG C  78     1959   1170   2197     26    178    202       C  
ATOM   2405  NH1 ARG C  78     -26.954   9.280   9.051  1.00 13.71           N1+
ANISOU 2405  NH1 ARG C  78     1910   1126   2175     24    225    112       N1+
ATOM   2406  NH2 ARG C  78     -27.209  10.379   7.033  1.00 13.23           N  
ANISOU 2406  NH2 ARG C  78     1859   1007   2159     48    190    266       N  
ATOM   2407  N   ALA C  79     -24.885   3.595   5.440  1.00 10.73           N  
ANISOU 2407  N   ALA C  79     1734   1032   1310    -70    -57    128       N  
ATOM   2408  CA  ALA C  79     -23.529   3.956   5.041  1.00 10.54           C  
ANISOU 2408  CA  ALA C  79     1755   1031   1217    -64    -20    127       C  
ATOM   2409  C   ALA C  79     -23.583   5.419   4.675  1.00 12.09           C  
ANISOU 2409  C   ALA C  79     1926   1187   1479    -48     22    194       C  
ATOM   2410  O   ALA C  79     -24.435   5.829   3.894  1.00 13.05           O  
ANISOU 2410  O   ALA C  79     2025   1305   1630    -18    -15    260       O  
ATOM   2411  CB  ALA C  79     -23.069   3.129   3.851  1.00  9.42           C  
ANISOU 2411  CB  ALA C  79     1665    956    959    -38    -90    134       C  
ATOM   2412  N   VAL C  80     -22.687   6.212   5.247  1.00 13.00           N  
ANISOU 2412  N   VAL C  80     2041   1270   1627    -66     95    179       N  
ATOM   2413  CA  VAL C  80     -22.677   7.644   4.981  1.00 11.99           C  
ANISOU 2413  CA  VAL C  80     1887   1080   1589    -57    135    242       C  
ATOM   2414  C   VAL C  80     -21.330   7.993   4.375  1.00 13.67           C  
ANISOU 2414  C   VAL C  80     2123   1318   1754    -64    162    283       C  
ATOM   2415  O   VAL C  80     -20.291   7.670   4.952  1.00 10.10           O  
ANISOU 2415  O   VAL C  80     1690    888   1259    -95    193    224       O  
ATOM   2416  CB  VAL C  80     -22.894   8.472   6.272  1.00 13.66           C  
ANISOU 2416  CB  VAL C  80     2065   1209   1917    -73    194    184       C  
ATOM   2417  CG1 VAL C  80     -22.858   9.975   5.965  1.00  8.77           C  
ANISOU 2417  CG1 VAL C  80     1422    501   1410    -63    229    247       C  
ATOM   2418  CG2 VAL C  80     -24.220   8.106   6.937  1.00 11.26           C  
ANISOU 2418  CG2 VAL C  80     1726    900   1651    -55    175    156       C  
ATOM   2419  N   CYS C  81     -21.354   8.622   3.198  1.00 11.85           N  
ANISOU 2419  N   CYS C  81     1882   1097   1525    -31    152    394       N  
ATOM   2420  CA  CYS C  81     -20.134   8.997   2.491  1.00 13.93           C  
ANISOU 2420  CA  CYS C  81     2151   1398   1743    -30    180    466       C  
ATOM   2421  C   CYS C  81     -20.056  10.507   2.469  1.00 14.53           C  
ANISOU 2421  C   CYS C  81     2183   1373   1964    -42    232    545       C  
ATOM   2422  O   CYS C  81     -20.999  11.170   2.051  1.00 18.17           O  
ANISOU 2422  O   CYS C  81     2617   1788   2500     -9    224    614       O  
ATOM   2423  CB  CYS C  81     -20.142   8.465   1.053  1.00 14.57           C  
ANISOU 2423  CB  CYS C  81     2247   1592   1695     33    127    547       C  
ATOM   2424  SG  CYS C  81     -20.370   6.676   0.921  1.00 16.27           S  
ANISOU 2424  SG  CYS C  81     2518   1905   1758     56     44    447       S  
ATOM   2425  N   THR C  82     -18.934  11.046   2.925  1.00 15.80           N  
ANISOU 2425  N   THR C  82     2335   1495   2173    -89    282    536       N  
ATOM   2426  CA  THR C  82     -18.806  12.488   3.097  1.00 16.35           C  
ANISOU 2426  CA  THR C  82     2362   1438   2413   -115    327    591       C  
ATOM   2427  C   THR C  82     -17.548  13.038   2.446  1.00 17.91           C  
ANISOU 2427  C   THR C  82     2534   1651   2620   -137    361    701       C  
ATOM   2428  O   THR C  82     -16.467  12.459   2.568  1.00 17.07           O  
ANISOU 2428  O   THR C  82     2442   1623   2423   -163    370    671       O  
ATOM   2429  CB  THR C  82     -18.756  12.864   4.593  1.00 15.50           C  
ANISOU 2429  CB  THR C  82     2249   1229   2412   -163    353    450       C  
ATOM   2430  CG2 THR C  82     -18.648  14.367   4.758  1.00 20.80           C  
ANISOU 2430  CG2 THR C  82     2880   1748   3275   -187    386    490       C  
ATOM   2431  OG1 THR C  82     -19.946  12.409   5.246  1.00 17.35           O  
ANISOU 2431  OG1 THR C  82     2493   1457   2642   -136    330    365       O  
ATOM   2432  N   ASN C  83     -17.692  14.158   1.748  1.00 15.52           N  
ANISOU 2432  N   ASN C  83     2188   1278   2431   -123    382    840       N  
ATOM   2433  CA  ASN C  83     -16.529  14.964   1.384  1.00 19.24           C  
ANISOU 2433  CA  ASN C  83     2614   1719   2975   -161    424    952       C  
ATOM   2434  C   ASN C  83     -16.887  16.437   1.554  1.00 22.00           C  
ANISOU 2434  C   ASN C  83     2919   1885   3556   -183    450   1012       C  
ATOM   2435  O   ASN C  83     -17.992  16.753   1.997  1.00 24.58           O  
ANISOU 2435  O   ASN C  83     3255   2123   3962   -160    438    952       O  
ATOM   2436  CB  ASN C  83     -15.968  14.617  -0.007  1.00 18.96           C  
ANISOU 2436  CB  ASN C  83     2563   1839   2801   -107    425   1115       C  
ATOM   2437  CG  ASN C  83     -16.841  15.100  -1.149  1.00 21.51           C  
ANISOU 2437  CG  ASN C  83     2859   2179   3136    -29    417   1271       C  
ATOM   2438  ND2 ASN C  83     -16.528  14.637  -2.361  1.00 19.47           N  
ANISOU 2438  ND2 ASN C  83     2590   2087   2720     44    408   1393       N  
ATOM   2439  OD1 ASN C  83     -17.769  15.884  -0.959  1.00 23.51           O  
ANISOU 2439  OD1 ASN C  83     3095   2308   3529    -23    420   1284       O  
ATOM   2440  N   TYR C  84     -15.973  17.344   1.239  1.00 22.21           N  
ANISOU 2440  N   TYR C  84     2892   1848   3700   -226    486   1129       N  
ATOM   2441  CA  TYR C  84     -16.241  18.746   1.542  1.00 23.17           C  
ANISOU 2441  CA  TYR C  84     2973   1763   4067   -256    506   1165       C  
ATOM   2442  C   TYR C  84     -17.432  19.340   0.754  1.00 26.82           C  
ANISOU 2442  C   TYR C  84     3419   2182   4590   -178    507   1293       C  
ATOM   2443  O   TYR C  84     -18.013  20.343   1.176  1.00 27.49           O  
ANISOU 2443  O   TYR C  84     3489   2091   4864   -182    514   1280       O  
ATOM   2444  CB  TYR C  84     -14.966  19.601   1.422  1.00 25.17           C  
ANISOU 2444  CB  TYR C  84     3163   1939   4461   -333    539   1267       C  
ATOM   2445  CG  TYR C  84     -14.637  20.085   0.031  1.00 27.02           C  
ANISOU 2445  CG  TYR C  84     3334   2223   4708   -299    571   1530       C  
ATOM   2446  CD1 TYR C  84     -14.988  21.367  -0.380  1.00 28.84           C  
ANISOU 2446  CD1 TYR C  84     3510   2295   5152   -295    594   1679       C  
ATOM   2447  CD2 TYR C  84     -13.959  19.272  -0.865  1.00 27.47           C  
ANISOU 2447  CD2 TYR C  84     3383   2491   4565   -262    580   1637       C  
ATOM   2448  CE1 TYR C  84     -14.684  21.822  -1.649  1.00 31.03           C  
ANISOU 2448  CE1 TYR C  84     3719   2630   5442   -256    631   1941       C  
ATOM   2449  CE2 TYR C  84     -13.654  19.717  -2.139  1.00 30.23           C  
ANISOU 2449  CE2 TYR C  84     3665   2910   4911   -215    613   1888       C  
ATOM   2450  CZ  TYR C  84     -14.015  20.993  -2.525  1.00 31.35           C  
ANISOU 2450  CZ  TYR C  84     3746   2899   5267   -214    641   2047       C  
ATOM   2451  OH  TYR C  84     -13.705  21.435  -3.789  1.00 32.53           O  
ANISOU 2451  OH  TYR C  84     3819   3131   5412   -160    681   2316       O  
ATOM   2452  N   LYS C  85     -17.803  18.704  -0.360  1.00 29.04           N  
ANISOU 2452  N   LYS C  85     3703   2626   4704   -100    495   1406       N  
ATOM   2453  CA  LYS C  85     -18.907  19.180  -1.206  1.00 29.31           C  
ANISOU 2453  CA  LYS C  85     3716   2655   4767    -16    493   1538       C  
ATOM   2454  C   LYS C  85     -20.289  18.726  -0.714  1.00 29.96           C  
ANISOU 2454  C   LYS C  85     3840   2734   4810     27    453   1408       C  
ATOM   2455  O   LYS C  85     -21.307  19.299  -1.094  1.00 31.67           O  
ANISOU 2455  O   LYS C  85     4036   2903   5094     86    453   1485       O  
ATOM   2456  CB  LYS C  85     -18.724  18.729  -2.661  1.00 29.13           C  
ANISOU 2456  CB  LYS C  85     3668   2826   4574     62    491   1716       C  
ATOM   2457  CG  LYS C  85     -17.392  19.116  -3.312  1.00 31.82           C  
ANISOU 2457  CG  LYS C  85     3951   3210   4928     38    536   1884       C  
ATOM   2458  CD  LYS C  85     -17.276  20.609  -3.553  1.00 36.01           C  
ANISOU 2458  CD  LYS C  85     4408   3573   5702     17    586   2059       C  
ATOM   2459  CE  LYS C  85     -18.139  21.053  -4.726  1.00 40.47           C  
ANISOU 2459  CE  LYS C  85     4930   4191   6254    126    596   2256       C  
ATOM   2460  NZ  LYS C  85     -18.094  22.542  -4.908  1.00 42.72           N1+
ANISOU 2460  NZ  LYS C  85     5142   4288   6801    108    648   2433       N1+
ATOM   2461  N   GLY C  86     -20.328  17.689   0.116  1.00 28.57           N  
ANISOU 2461  N   GLY C  86     3715   2615   4524      1    422   1224       N  
ATOM   2462  CA  GLY C  86     -21.587  17.208   0.658  1.00 24.16           C  
ANISOU 2462  CA  GLY C  86     3186   2060   3934     35    386   1108       C  
ATOM   2463  C   GLY C  86     -21.503  15.755   1.088  1.00 22.15           C  
ANISOU 2463  C   GLY C  86     2979   1933   3504     21    347    969       C  
ATOM   2464  O   GLY C  86     -20.414  15.199   1.262  1.00 18.60           O  
ANISOU 2464  O   GLY C  86     2548   1541   2976    -22    353    925       O  
ATOM   2465  N   GLU C  87     -22.658  15.132   1.269  1.00 19.76           N  
ANISOU 2465  N   GLU C  87     2690   1671   3146     58    306    906       N  
ATOM   2466  CA  GLU C  87     -22.669  13.730   1.631  1.00 22.09           C  
ANISOU 2466  CA  GLU C  87     3026   2074   3293     46    265    790       C  
ATOM   2467  C   GLU C  87     -23.783  12.989   0.925  1.00 19.94           C  
ANISOU 2467  C   GLU C  87     2754   1899   2924    103    203    816       C  
ATOM   2468  O   GLU C  87     -24.756  13.597   0.460  1.00 22.00           O  
ANISOU 2468  O   GLU C  87     2981   2134   3244    151    195    897       O  
ATOM   2469  CB  GLU C  87     -22.769  13.564   3.142  1.00 26.78           C  
ANISOU 2469  CB  GLU C  87     3633   2602   3941      3    279    629       C  
ATOM   2470  CG  GLU C  87     -24.123  13.875   3.738  1.00 33.23           C  
ANISOU 2470  CG  GLU C  87     4428   3357   4840     35    273    590       C  
ATOM   2471  CD  GLU C  87     -24.167  13.547   5.230  1.00 38.33           C  
ANISOU 2471  CD  GLU C  87     5082   3977   5504      8    287    433       C  
ATOM   2472  OE1 GLU C  87     -25.255  13.233   5.751  1.00 37.69           O  
ANISOU 2472  OE1 GLU C  87     4985   3909   5426     38    271    391       O  
ATOM   2473  OE2 GLU C  87     -23.103  13.599   5.882  1.00 39.81           O1-
ANISOU 2473  OE2 GLU C  87     5284   4143   5699    -38    315    359       O1-
ATOM   2474  N   ALA C  88     -23.608  11.675   0.821  1.00 19.62           N  
ANISOU 2474  N   ALA C  88     2749   1968   2739     98    154    749       N  
ATOM   2475  CA  ALA C  88     -24.630  10.788   0.300  1.00 19.85           C  
ANISOU 2475  CA  ALA C  88     2779   2081   2680    138     79    740       C  
ATOM   2476  C   ALA C  88     -24.803   9.653   1.303  1.00 16.25           C  
ANISOU 2476  C   ALA C  88     2350   1635   2189     95     52    599       C  
ATOM   2477  O   ALA C  88     -23.833   9.168   1.881  1.00 16.30           O  
ANISOU 2477  O   ALA C  88     2389   1650   2154     55     73    526       O  
ATOM   2478  CB  ALA C  88     -24.229  10.244  -1.074  1.00 21.94           C  
ANISOU 2478  CB  ALA C  88     3058   2480   2798    190     31    810       C  
ATOM   2479  N   SER C  89     -26.043   9.242   1.516  1.00 15.32           N  
ANISOU 2479  N   SER C  89     2209   1520   2091    106      6    573       N  
ATOM   2480  CA  SER C  89     -26.346   8.193   2.476  1.00 15.99           C  
ANISOU 2480  CA  SER C  89     2303   1610   2161     68    -17    466       C  
ATOM   2481  C   SER C  89     -27.123   7.093   1.779  1.00 17.96           C  
ANISOU 2481  C   SER C  89     2552   1936   2336     84   -116    462       C  
ATOM   2482  O   SER C  89     -27.923   7.349   0.886  1.00 16.30           O  
ANISOU 2482  O   SER C  89     2312   1757   2123    126   -161    531       O  
ATOM   2483  CB  SER C  89     -27.206   8.739   3.622  1.00 18.20           C  
ANISOU 2483  CB  SER C  89     2539   1814   2561     61     23    437       C  
ATOM   2484  OG  SER C  89     -26.497   9.704   4.362  1.00 22.08           O  
ANISOU 2484  OG  SER C  89     3034   2228   3127     47    101    413       O  
ATOM   2485  N   ASP C  90     -26.875   5.864   2.197  1.00 14.65           N  
ANISOU 2485  N   ASP C  90     2162   1543   1860     51   -151    378       N  
ATOM   2486  CA  ASP C  90     -27.630   4.734   1.711  1.00 14.54           C  
ANISOU 2486  CA  ASP C  90     2145   1577   1803     53   -254    354       C  
ATOM   2487  C   ASP C  90     -28.129   3.950   2.920  1.00 12.95           C  
ANISOU 2487  C   ASP C  90     1921   1339   1660      3   -255    291       C  
ATOM   2488  O   ASP C  90     -27.344   3.609   3.810  1.00 10.44           O  
ANISOU 2488  O   ASP C  90     1629   1006   1333    -28   -205    235       O  
ATOM   2489  CB  ASP C  90     -26.735   3.867   0.833  1.00 16.56           C  
ANISOU 2489  CB  ASP C  90     2462   1903   1925     72   -310    320       C  
ATOM   2490  CG  ASP C  90     -27.494   2.775   0.127  1.00 16.39           C  
ANISOU 2490  CG  ASP C  90     2442   1926   1861     84   -434    286       C  
ATOM   2491  OD1 ASP C  90     -28.742   2.741   0.222  1.00 21.21           O  
ANISOU 2491  OD1 ASP C  90     2995   2517   2546     72   -479    304       O  
ATOM   2492  OD2 ASP C  90     -26.833   1.959  -0.535  1.00 18.13           O1-
ANISOU 2492  OD2 ASP C  90     2716   2201   1971    109   -491    238       O1-
ATOM   2493  N   TYR C  91     -29.433   3.686   2.939  1.00 14.03           N  
ANISOU 2493  N   TYR C  91     2000   1474   1857     -2   -310    313       N  
ATOM   2494  CA  TYR C  91     -30.098   2.936   4.001  1.00 14.16           C  
ANISOU 2494  CA  TYR C  91     1974   1468   1940    -44   -316    285       C  
ATOM   2495  C   TYR C  91     -30.580   1.596   3.459  1.00 18.15           C  
ANISOU 2495  C   TYR C  91     2478   1993   2425    -70   -436    258       C  
ATOM   2496  O   TYR C  91     -31.174   1.545   2.383  1.00 17.22           O  
ANISOU 2496  O   TYR C  91     2348   1907   2287    -47   -522    281       O  
ATOM   2497  CB  TYR C  91     -31.337   3.688   4.490  1.00 15.14           C  
ANISOU 2497  CB  TYR C  91     2013   1573   2165    -30   -289    345       C  
ATOM   2498  CG  TYR C  91     -31.104   5.027   5.147  1.00 18.46           C  
ANISOU 2498  CG  TYR C  91     2424   1955   2633      0   -181    360       C  
ATOM   2499  CD1 TYR C  91     -31.168   5.162   6.528  1.00 17.96           C  
ANISOU 2499  CD1 TYR C  91     2330   1872   2621     -6   -108    330       C  
ATOM   2500  CD2 TYR C  91     -30.867   6.166   4.385  1.00 18.10           C  
ANISOU 2500  CD2 TYR C  91     2396   1895   2586     41   -157    408       C  
ATOM   2501  CE1 TYR C  91     -30.977   6.393   7.134  1.00 15.13           C  
ANISOU 2501  CE1 TYR C  91     1964   1472   2311     29    -22    324       C  
ATOM   2502  CE2 TYR C  91     -30.672   7.404   4.984  1.00 19.35           C  
ANISOU 2502  CE2 TYR C  91     2545   1996   2810     67    -68    416       C  
ATOM   2503  CZ  TYR C  91     -30.739   7.509   6.359  1.00 17.73           C  
ANISOU 2503  CZ  TYR C  91     2315   1764   2655     61     -6    363       C  
ATOM   2504  OH  TYR C  91     -30.550   8.734   6.959  1.00 14.89           O  
ANISOU 2504  OH  TYR C  91     1950   1342   2364     92     70    351       O  
ATOM   2505  N   ALA C  92     -30.338   0.516   4.199  1.00 15.64           N  
ANISOU 2505  N   ALA C  92     2169   1656   2119   -113   -445    209       N  
ATOM   2506  CA  ALA C  92     -30.888  -0.786   3.839  1.00 16.76           C  
ANISOU 2506  CA  ALA C  92     2301   1790   2278   -147   -562    183       C  
ATOM   2507  C   ALA C  92     -31.180  -1.559   5.109  1.00 16.17           C  
ANISOU 2507  C   ALA C  92     2178   1679   2286   -198   -535    186       C  
ATOM   2508  O   ALA C  92     -30.581  -1.288   6.147  1.00 15.28           O  
ANISOU 2508  O   ALA C  92     2070   1565   2171   -197   -430    181       O  
ATOM   2509  CB  ALA C  92     -29.930  -1.559   2.941  1.00 13.45           C  
ANISOU 2509  CB  ALA C  92     1972   1388   1751   -131   -631    111       C  
ATOM   2510  N   THR C  93     -32.117  -2.504   5.035  1.00 15.22           N  
ANISOU 2510  N   THR C  93     2005   1535   2244   -241   -631    200       N  
ATOM   2511  CA  THR C  93     -32.520  -3.257   6.211  1.00 17.40           C  
ANISOU 2511  CA  THR C  93     2215   1782   2614   -289   -606    232       C  
ATOM   2512  C   THR C  93     -32.072  -4.711   6.125  1.00 16.93           C  
ANISOU 2512  C   THR C  93     2198   1673   2561   -329   -684    178       C  
ATOM   2513  O   THR C  93     -32.015  -5.299   5.046  1.00 15.88           O  
ANISOU 2513  O   THR C  93     2114   1521   2399   -332   -802    120       O  
ATOM   2514  CB  THR C  93     -34.057  -3.239   6.408  1.00 21.48           C  
ANISOU 2514  CB  THR C  93     2610   2300   3252   -316   -647    318       C  
ATOM   2515  CG2 THR C  93     -34.594  -1.806   6.512  1.00 20.24           C  
ANISOU 2515  CG2 THR C  93     2407   2189   3095   -265   -572    374       C  
ATOM   2516  OG1 THR C  93     -34.675  -3.885   5.299  1.00 24.46           O  
ANISOU 2516  OG1 THR C  93     2981   2659   3656   -344   -797    299       O  
ATOM   2517  N   LEU C  94     -31.766  -5.285   7.278  1.00 15.64           N  
ANISOU 2517  N   LEU C  94     2014   1492   2437   -353   -617    197       N  
ATOM   2518  CA  LEU C  94     -31.444  -6.702   7.380  1.00 13.55           C  
ANISOU 2518  CA  LEU C  94     1774   1167   2207   -393   -681    167       C  
ATOM   2519  C   LEU C  94     -32.547  -7.382   8.177  1.00 15.36           C  
ANISOU 2519  C   LEU C  94     1882   1361   2592   -451   -700    261       C  
ATOM   2520  O   LEU C  94     -32.909  -6.934   9.262  1.00 17.16           O  
ANISOU 2520  O   LEU C  94     2028   1633   2857   -443   -596    342       O  
ATOM   2521  CB  LEU C  94     -30.101  -6.900   8.093  1.00 14.62           C  
ANISOU 2521  CB  LEU C  94     1978   1317   2260   -368   -583    128       C  
ATOM   2522  CG  LEU C  94     -29.597  -8.342   8.193  1.00 16.47           C  
ANISOU 2522  CG  LEU C  94     2253   1486   2519   -395   -637     94       C  
ATOM   2523  CD1 LEU C  94     -29.356  -8.930   6.808  1.00 14.12           C  
ANISOU 2523  CD1 LEU C  94     2042   1145   2177   -387   -777     -1       C  
ATOM   2524  CD2 LEU C  94     -28.326  -8.414   9.039  1.00 14.48           C  
ANISOU 2524  CD2 LEU C  94     2051   1270   2182   -363   -522     74       C  
ATOM   2525  N   ASP C  95     -33.082  -8.460   7.626  1.00 13.38           N  
ANISOU 2525  N   ASP C  95     1615   1034   2433   -505   -836    251       N  
ATOM   2526  CA  ASP C  95     -34.074  -9.267   8.314  1.00 17.45           C  
ANISOU 2526  CA  ASP C  95     2011   1503   3117   -573   -867    351       C  
ATOM   2527  C   ASP C  95     -33.421 -10.601   8.634  1.00 17.91           C  
ANISOU 2527  C   ASP C  95     2108   1476   3221   -605   -897    327       C  
ATOM   2528  O   ASP C  95     -33.270 -11.445   7.757  1.00 22.94           O  
ANISOU 2528  O   ASP C  95     2807   2029   3879   -628  -1029    242       O  
ATOM   2529  CB  ASP C  95     -35.287  -9.462   7.415  1.00 22.03           C  
ANISOU 2529  CB  ASP C  95     2527   2048   3796   -621  -1015    362       C  
ATOM   2530  CG  ASP C  95     -36.334 -10.378   8.031  1.00 28.50           C  
ANISOU 2530  CG  ASP C  95     3211   2808   4811   -704  -1065    474       C  
ATOM   2531  OD1 ASP C  95     -36.346 -10.525   9.272  1.00 29.90           O  
ANISOU 2531  OD1 ASP C  95     3316   3006   5038   -709   -954    578       O  
ATOM   2532  OD2 ASP C  95     -37.149 -10.940   7.269  1.00 30.06           O1-
ANISOU 2532  OD2 ASP C  95     3366   2944   5112   -763  -1217    461       O1-
ATOM   2533  N   VAL C  96     -32.994 -10.776   9.881  1.00 17.96           N  
ANISOU 2533  N   VAL C  96     2082   1507   3233   -594   -773    394       N  
ATOM   2534  CA  VAL C  96     -32.388 -12.039  10.300  1.00 14.32           C  
ANISOU 2534  CA  VAL C  96     1649    968   2824   -618   -785    394       C  
ATOM   2535  C   VAL C  96     -33.515 -12.995  10.693  1.00 22.00           C  
ANISOU 2535  C   VAL C  96     2490   1860   4007   -700   -854    513       C  
ATOM   2536  O   VAL C  96     -34.192 -12.789  11.695  1.00 26.21           O  
ANISOU 2536  O   VAL C  96     2895   2450   4612   -709   -769    652       O  
ATOM   2537  CB  VAL C  96     -31.429 -11.845  11.476  1.00 12.05           C  
ANISOU 2537  CB  VAL C  96     1374    757   2448   -564   -623    423       C  
ATOM   2538  CG1 VAL C  96     -30.802 -13.183  11.890  1.00 15.75           C  
ANISOU 2538  CG1 VAL C  96     1869   1146   2970   -582   -634    434       C  
ATOM   2539  CG2 VAL C  96     -30.340 -10.824  11.110  1.00 10.79           C  
ANISOU 2539  CG2 VAL C  96     1328    675   2095   -493   -556    315       C  
ATOM   2540  N   THR C  97     -33.706 -14.036   9.893  1.00 23.23           N  
ANISOU 2540  N   THR C  97     2676   1887   4266   -757  -1012    457       N  
ATOM   2541  CA  THR C  97     -34.913 -14.855   9.965  1.00 31.78           C  
ANISOU 2541  CA  THR C  97     3630   2875   5569   -851  -1116    556       C  
ATOM   2542  C   THR C  97     -34.634 -16.218  10.569  1.00 39.63           C  
ANISOU 2542  C   THR C  97     4605   3750   6701   -896  -1133    612       C  
ATOM   2543  O   THR C  97     -33.574 -16.797  10.341  1.00 39.20           O  
ANISOU 2543  O   THR C  97     4674   3637   6584   -864  -1147    511       O  
ATOM   2544  CB  THR C  97     -35.494 -15.076   8.574  1.00 35.81           C  
ANISOU 2544  CB  THR C  97     4170   3309   6127   -892  -1310    448       C  
ATOM   2545  CG2 THR C  97     -35.731 -13.749   7.883  1.00 34.67           C  
ANISOU 2545  CG2 THR C  97     4048   3283   5843   -840  -1297    398       C  
ATOM   2546  OG1 THR C  97     -34.570 -15.841   7.795  1.00 39.95           O  
ANISOU 2546  OG1 THR C  97     4837   3740   6601   -873  -1407    293       O  
ATOM   2547  N   GLY C  98     -35.597 -16.730  11.328  1.00 31.11           N  
ATOM   2548  CA  GLY C  98     -35.447 -18.007  12.010  1.00 36.04           C  
ATOM   2549  C   GLY C  98     -35.905 -19.181  11.172  1.00 42.53           C  
ATOM   2550  O   GLY C  98     -36.414 -19.002  10.066  1.00 47.32           O  
HETATM 2551  O1  SO4 C 102     -35.502 -14.701  17.493  1.00 32.57           O  
HETATM 2552  O2  SO4 C 102     -36.884 -13.314  18.914  1.00 35.98           O  
HETATM 2553  O3  SO4 C 102     -36.269 -15.530  19.561  1.00 39.23           O1-
HETATM 2554  O4  SO4 C 102     -34.638 -13.752  19.490  1.00 34.92           O  
HETATM 2555  S   SO4 C 102     -35.827 -14.324  18.865  0.54 35.19           S  
HETATM 2556  O   HOH C 103     -20.365   4.365  18.032  1.00 11.79           O  
HETATM 2557  O   HOH C 104     -19.831 -16.873  11.627  1.00 14.35           O  
HETATM 2558  O   HOH C 105     -24.749 -11.679   1.944  1.00 25.58           O  
HETATM 2559  O   HOH C 106     -13.453 -12.544  13.403  1.00 15.16           O  
HETATM 2560  O   HOH C 107     -16.534   0.770   3.955  1.00 15.17           O  
HETATM 2561  O   HOH C 108     -26.579 -13.410   3.276  1.00 30.09           O  
HETATM 2562  O   HOH C 109     -19.121   9.969   6.509  1.00 14.91           O  
HETATM 2563  O   HOH C 110     -34.905   7.041   7.297  1.00 32.68           O  
HETATM 2564  O   HOH C 111     -25.902  -5.021  -0.776  1.00 17.48           O  
HETATM 2565  O   HOH C 112     -18.009   3.523  11.022  1.00 17.48           O  
HETATM 2566  O   HOH C 113     -29.980   0.769  -0.666  1.00 22.17           O  
HETATM 2567  O   HOH C 114     -33.940  11.728   6.723  1.00 34.58           O  
HETATM 2568  O   HOH C 115     -22.613 -17.614   5.978  1.00 20.29           O  
HETATM 2569  O   HOH C 116     -14.302   2.218   5.086  1.00 21.95           O  
HETATM 2570  O   HOH C 117     -14.246   4.027   6.940  1.00 26.23           O  
HETATM 2571  O   HOH C 118     -28.133 -20.997   9.294  1.00 22.85           O  
HETATM 2572  O   HOH C 119     -14.625  -3.506  -0.266  1.00 21.90           O  
HETATM 2573  O   HOH C 120     -15.817  -6.130   4.424  1.00 29.72           O  
HETATM 2574  O   HOH C 121     -17.363  11.010   8.274  1.00 38.95           O  
HETATM 2575  O   HOH C 122     -26.184  -7.786   0.066  1.00 24.30           O  
HETATM 2576  O   HOH C 123     -27.097  12.036   3.200  1.00 27.49           O  
HETATM 2577  O   HOH C 124     -12.302   0.468   5.629  1.00 33.72           O  
HETATM 2578  O   HOH C 125     -33.129   9.437   7.844  1.00 39.96           O  
HETATM 2579  O   HOH C 126     -25.052  16.997   1.393  1.00 38.04           O  
HETATM 2580  O   HOH C 127     -25.176 -15.557   3.627  1.00 41.44           O  
HETATM 2581  O   HOH C 128     -13.506  16.251   1.166  1.00 29.53           O  
HETATM 2582  O   HOH C 129     -27.545   8.834  -1.844  1.00 37.60           O  
HETATM 2583  O   HOH C 130     -14.938   7.167  -4.908  1.00 27.02           O  
HETATM 2584  O   HOH C 131     -24.786  -6.286  13.735  1.00 29.47           O  
HETATM 2585  O   HOH C 132     -25.790  -4.245  -3.295  1.00 20.48           O  
HETATM 2586  O   HOH C 133     -30.128  10.671   5.160  1.00 26.72           O  
HETATM 2587  O   HOH C 134     -10.527  -1.452   3.433  1.00 39.29           O  
HETATM 2588  O   HOH C 135     -22.030  10.039   9.097  1.00 28.66           O  
HETATM 2589  O   HOH C 136     -15.246   1.921  -7.657  1.00 44.33           O  
HETATM 2590  O   HOH C 137     -21.435   0.064  17.728  1.00 28.78           O  
HETATM 2591  O   HOH C 138     -12.866  -6.232  11.403  1.00 22.31           O  
HETATM 2592  O   HOH C 139     -19.133  -5.958  17.155  1.00 28.58           O  
HETATM 2593  O   HOH C 140     -34.569 -18.989   7.648  1.00 41.30           O  
HETATM 2594  O   HOH C 141     -31.390   4.746   0.786  1.00 24.23           O  
HETATM 2595  O   HOH C 142     -26.158   9.220  -4.419  1.00 34.15           O  
HETATM 2596  O   HOH C 143     -19.864  17.740   3.840  1.00 30.85           O  
HETATM 2597  O   HOH C 144     -16.892  -9.496   9.537  1.00 25.43           O  
HETATM 2598  O   HOH C 145     -25.451  -9.337  17.594  1.00 38.91           O  
HETATM 2599  O   HOH C 146     -14.653   7.639  -2.121  1.00 26.72           O  
HETATM 2600  O   HOH C 147     -25.510 -18.032  19.763  1.00 34.30           O  
HETATM 2601  O   HOH C 148     -25.154  -6.483  -4.410  1.00 40.78           O  
HETATM 2602  O   HOH C 149     -15.604   4.491   9.691  1.00 38.38           O  
HETATM 2603  O   HOH C 151     -12.895   0.726  13.846  1.00 28.72           O  
HETATM 2604  O   HOH C 162     -24.871  -3.003  16.085  1.00 28.21           O  
HETATM 2605  O   HOH C 166     -13.010   2.622  11.404  1.00 43.07           O  
HETATM 2606  O   HOH C 167     -35.842  -6.584   8.510  1.00 44.44           O  
HETATM 2607  O   HOH C 174     -28.082   0.755  -7.630  1.00 37.92           O  
HETATM 2608  O   HOH C 176     -27.486  14.335   5.210  1.00 35.44           O  
HETATM 2609  O   HOH C 190     -20.350  11.742   8.289  1.00 40.01           O  
HETATM 2610  O   HOH C 193     -33.502  10.569   4.107  1.00 39.58           O  
HETATM 2611  O   HOH C 200     -20.547 -13.542   4.006  1.00 34.18           O  
HETATM 2612  O   HOH C 203     -29.531 -23.372   9.220  1.00 44.82           O  
HETATM 2613  O   HOH C 206     -33.311 -19.725  10.102  1.00 43.24           O  
HETATM 2614  O   HOH C 207     -35.716  -4.610  10.189  1.00 40.64           O  
HETATM 2615  O   HOH C 209     -34.705 -10.856  13.794  1.00 37.35           O  
HETATM 2616  O   HOH C 222     -28.175  10.690   0.258  1.00 30.30           O  
HETATM 2617  O   HOH C 228     -12.262   6.563  -5.866  1.00 42.79           O  
HETATM 2618  O   HOH C 235     -36.053  -5.309  12.630  1.00 40.08           O  
HETATM 2619  O   HOH C 249     -12.963  -1.118  -7.193  1.00 44.05           O  
HETATM 2620  O   HOH C 262     -16.366   3.866  14.697  1.00 36.22           O  
HETATM 2621  O   HOH C 263     -11.945  -1.165  16.248  1.00 37.66           O  
HETATM 2622  O   HOH C 266     -19.432  -1.879  16.344  1.00 27.51           O  
HETATM 2623  O   HOH C 267     -16.808   4.692  -8.847  1.00 27.84           O  
HETATM 2624  O   HOH C 269     -33.869 -16.665   4.987  1.00 36.48           O  
HETATM 2625  O   HOH C 270     -16.027  23.921 -13.182  1.00 37.60           O  
HETATM 2626  O   HOH C 271     -13.588  -4.120  18.358  1.00 38.76           O  
HETATM 2627  O   HOH C 274     -23.177 -18.001  18.084  1.00 27.52           O  
HETATM 2628  O   HOH C 275     -14.695  -9.045   4.134  1.00 41.56           O  
HETATM 2629  O   HOH C 278     -31.807   3.141  -1.357  1.00 47.97           O  
HETATM 2630  O   HOH C 279     -33.120  -2.522  -1.281  1.00 27.53           O  
HETATM 2631  O   HOH C 287     -21.905  21.326  -2.710  1.00 47.28           O  
HETATM 2632  O   HOH C 288     -14.434  15.713   8.232  1.00 49.19           O  
HETATM 2633  O   HOH C 295     -18.105  24.490 -14.726  1.00 39.88           O  
HETATM 2634  O   HOH C 301     -24.892  13.216  -3.939  1.00 47.12           O  
HETATM 2635  O   HOH C 302     -31.127   7.910   0.834  1.00 45.10           O  
HETATM 2636  O   HOH C 304     -25.386 -18.312   3.364  1.00 45.44           O  
CONECT  779  783
CONECT  780  783
CONECT  781  783
CONECT  782  783
CONECT  783  779  780  781  782
CONECT  784  788
CONECT  785  788
CONECT  786  788
CONECT  787  788
CONECT  788  784  785  786  787
CONECT  789  793
CONECT  790  793
CONECT  791  793
CONECT  792  793
CONECT  793  789  790  791  792
CONECT  794  798
CONECT  795  798
CONECT  796  798
CONECT  797  798
CONECT  798  794  795  796  797
CONECT  799  803
CONECT  800  803
CONECT  801  803
CONECT  802  803
CONECT  803  799  800  801  802
CONECT 1683 1687
CONECT 1684 1687
CONECT 1685 1687
CONECT 1686 1687
CONECT 1687 1683 1684 1685 1686
CONECT 2551 2555
CONECT 2552 2555
CONECT 2553 2555
CONECT 2554 2555
CONECT 2555 2551 2552 2553 2554
END
