# Supplementary material
Source: publisher figshare collection journal article supplement (https://plos.figshare.com/articles/dataset/_/11411415)
Supplement: Supplementary file 1 [file 1 › pone.0226693.s018.pdb]

REMARK Date 2018-07-04 Time 21:18:01 CEST +0200 (1530731881.29 s)
REMARK PHENIX refinement
REMARK 
REMARK ****************** INPUT FILES AND LABELS ******************************
REMARK Reflections:
REMARK   file name      : /media/flo/FSSeagate/EMBL_Dr_Backup/Xray/M4_trigonal/Refine_244/M4_trigonal_refine_data.mtz
REMARK   labels         : ['F-obs,SIGF-obs']
REMARK R-free flags:
REMARK   file name      : /media/flo/FSSeagate/EMBL_Dr_Backup/Xray/M4_trigonal/Refine_244/M4_trigonal_refine_data.mtz
REMARK   label          : R-free-flags
REMARK   test_flag_value: 1
REMARK Model file name(s): 
REMARK   /media/flo/FSSeagate/crystallography/M4_trigonal_backsoaked/M4_trigonal_refine_243.pdb
REMARK 
REMARK ******************** REFINEMENT SUMMARY: QUICK FACTS *******************
REMARK Start: r_work = 0.2123 r_free = 0.2210 bonds = 0.006 angles = 1.081
REMARK Final: r_work = 0.2080 r_free = 0.2212 bonds = 0.006 angles = 1.081
REMARK ************************************************************************
REMARK 
REMARK ****************** REFINEMENT STATISTICS STEP BY STEP ******************
REMARK leading digit, like 1_, means number of macro-cycle                     
REMARK 0    : statistics at the very beginning when nothing is done yet        
REMARK 1_bss: bulk solvent correction and/or (anisotropic) scaling             
REMARK 1_adp: refinement of ADPs (Atomic Displacement Parameters)              
REMARK 1_wat: ordered solvent update (add / remove)                            
REMARK ------------------------------------------------------------------------
REMARK  stage       r-work r-free bonds angles b_min b_max b_ave n_water shift
REMARK       0    : 0.2712 0.2811 0.006  1.08  14.4  79.7  33.0 185      0.000
REMARK       1_bss: 0.2123 0.2210 0.006  1.08  15.9  81.2  34.4 185      0.000
REMARK 1_settarget: 0.2123 0.2210 0.006  1.08  15.9  81.2  34.4 185      0.000
REMARK    1_weight: 0.2123 0.2210 0.006  1.08  15.9  81.2  34.4 185      0.000
REMARK       1_adp: 0.2105 0.2253 0.006  1.08  15.8  94.7  38.0 185      0.000
REMARK       2_bss: 0.2101 0.2258 0.006  1.08  15.8  94.7  38.0 185      0.000
REMARK 2_settarget: 0.2101 0.2258 0.006  1.08  15.8  94.7  38.0 185      0.000
REMARK    2_weight: 0.2101 0.2258 0.006  1.08  15.8  94.7  38.0 185      0.000
REMARK       2_adp: 0.2080 0.2236 0.006  1.08  15.4  98.7  37.6 185      0.000
REMARK       3_bss: 0.2080 0.2239 0.006  1.08  15.4  98.7  37.6 185      0.000
REMARK 3_settarget: 0.2080 0.2239 0.006  1.08  15.4  98.7  37.6 185      0.000
REMARK       3_sol: 0.2092 0.2224 0.006  1.08  15.4  90.1  37.4 189       n/a
REMARK    3_weight: 0.2092 0.2224 0.006  1.08  15.4  90.1  37.4 189       n/a
REMARK       3_adp: 0.2089 0.2185 0.006  1.08  16.3  88.4  36.9 189       n/a
REMARK       4_bss: 0.2087 0.2171 0.006  1.08  16.3  88.4  36.9 189       n/a
REMARK 4_settarget: 0.2087 0.2171 0.006  1.08  16.3  88.4  36.9 189       n/a
REMARK       4_sol: 0.2082 0.2147 0.006  1.08  16.3  88.4  36.7 204       n/a
REMARK    4_weight: 0.2082 0.2147 0.006  1.08  16.3  88.4  36.7 204       n/a
REMARK       4_adp: 0.2065 0.2156 0.006  1.08  16.5  87.7  36.5 204       n/a
REMARK       5_bss: 0.2066 0.2154 0.006  1.08  16.5  87.7  36.5 204       n/a
REMARK 5_settarget: 0.2066 0.2154 0.006  1.08  16.5  87.7  36.5 204       n/a
REMARK       5_sol: 0.2048 0.2146 0.006  1.08  16.5  87.7  36.8 234       n/a
REMARK    5_weight: 0.2048 0.2146 0.006  1.08  16.5  87.7  36.8 234       n/a
REMARK       5_adp: 0.2047 0.2157 0.006  1.08  15.6  85.6  36.4 234       n/a
REMARK         end: 0.2080 0.2212 0.006  1.08  15.6  85.6  35.5 195       n/a
REMARK ------------------------------------------------------------------------
REMARK MODEL CONTENT.
REMARK  ELEMENT        ATOM RECORD COUNT   OCCUPANCY SUM
REMARK       Zn                        1            0.38
REMARK       Cl                        3            2.86
REMARK        C                      476          468.00
REMARK        O                      347          343.00
REMARK        N                      137          135.00
REMARK        S                        4            4.00
REMARK    TOTAL                      968          953.24

REMARK -----------------------------------------------------------------------
REMARK r_free_flags.md5.hexdigest 5b60c915be8757b37e49bdd89f8b315c
REMARK 
REMARK IF THIS FILE IS FOR PDB DEPOSITION: REMOVE ALL FROM THIS LINE UP.
REMARK   3
REMARK   3 REFINEMENT.
REMARK   3   PROGRAM     : PHENIX (1.13_2998: ???)
REMARK   3   AUTHORS     : Adams,Afonine,Bunkoczi,Burnley,Chen,Dar,Davis,
REMARK   3               : Draizen,Echols,Gildea,Gros,Grosse-Kunstleve,Headd,
REMARK   3               : Hintze,Hung,Ioerger,Liebschner,McCoy,McKee,Moriarty,
REMARK   3               : Oeffner,Poon,Read,Richardson,Richardson,Sacchettini,
REMARK   3               : Sauter,Sobolev,Storoni,Terwilliger,Williams,Zwart
REMARK   3
REMARK   3  X-RAY DATA.
REMARK   3  
REMARK   3  REFINEMENT TARGET : ML
REMARK   3  
REMARK   3  DATA USED IN REFINEMENT.
REMARK   3   RESOLUTION RANGE HIGH (ANGSTROMS) : 1.600   
REMARK   3   RESOLUTION RANGE LOW  (ANGSTROMS) : 27.773  
REMARK   3   MIN(FOBS/SIGMA_FOBS)              : 1.37  
REMARK   3   COMPLETENESS FOR RANGE        (%) : 99.42 
REMARK   3   NUMBER OF REFLECTIONS             : 27076     
REMARK   3   NUMBER OF REFLECTIONS (NON-ANOMALOUS) : 27076     
REMARK   3  
REMARK   3  FIT TO DATA USED IN REFINEMENT.
REMARK   3   R VALUE     (WORKING + TEST SET) : 0.2089
REMARK   3   R VALUE            (WORKING SET) : 0.2080
REMARK   3   FREE R VALUE                     : 0.2212
REMARK   3   FREE R VALUE TEST SET SIZE   (%) : 6.43  
REMARK   3   FREE R VALUE TEST SET COUNT      : 1740      
REMARK   3  
REMARK   3  FIT TO DATA USED IN REFINEMENT (IN BINS).
REMARK   3   BIN  RESOLUTION RANGE  COMPL.    NWORK NFREE   RWORK  RFREE  CCWORK CCFREE
REMARK   3     1 27.7768 -  3.6605    0.95     2116   148  0.2088 0.2000   0.883  0.893
REMARK   3     2  3.6605 -  2.9065    1.00     2149   146  0.1988 0.2089   0.904  0.907
REMARK   3     3  2.9065 -  2.5394    1.00     2138   144  0.2139 0.2602   0.882  0.838
REMARK   3     4  2.5394 -  2.3073    1.00     2138   144  0.2146 0.2515   0.876  0.826
REMARK   3     5  2.3073 -  2.1420    1.00     2101   145  0.2086 0.2115   0.894  0.914
REMARK   3     6  2.1420 -  2.0158    1.00     2110   148  0.1947 0.2032   0.912  0.904
REMARK   3     7  2.0158 -  1.9148    1.00     2091   147  0.1933 0.2332   0.920  0.901
REMARK   3     8  1.9148 -  1.8315    1.00     2109   146  0.2050 0.2129   0.900  0.876
REMARK   3     9  1.8315 -  1.7610    1.00     2109   143  0.2283 0.2646   0.891  0.823
REMARK   3    10  1.7610 -  1.7002    1.00     2070   142  0.2162 0.2559   0.894  0.840
REMARK   3    11  1.7002 -  1.6471    1.00     2115   144  0.2302 0.2601   0.886  0.872
REMARK   3    12  1.6471 -  1.6000    1.00     2090   143  0.2494 0.2311   0.866  0.900
REMARK   3  
REMARK   3  BULK SOLVENT MODELLING.
REMARK   3   METHOD USED        : FLAT BULK SOLVENT MODEL
REMARK   3   SOLVENT RADIUS     : 1.11    
REMARK   3   SHRINKAGE RADIUS   : 0.90    
REMARK   3   GRID STEP FACTOR   : 4.00    
REMARK   3  
REMARK   3  ERROR ESTIMATES.
REMARK   3   COORDINATE ERROR (MAXIMUM-LIKELIHOOD BASED)     : 0.16    
REMARK   3   PHASE ERROR (DEGREES, MAXIMUM-LIKELIHOOD BASED) : 21.93   
REMARK   3  
REMARK   3  STRUCTURE FACTORS CALCULATION ALGORITHM : FFT
REMARK   3  
REMARK   3  
REMARK   3  DEVIATIONS FROM IDEAL VALUES.
REMARK   3    BOND      :  0.006   0.028    786
REMARK   3    ANGLE     :  1.081   6.031   1073
REMARK   3    CHIRALITY :  0.475   5.248    126
REMARK   3    PLANARITY :  0.004   0.021    137
REMARK   3    DIHEDRAL  : 13.410  88.162    284
REMARK   3    MIN NONBONDED DISTANCE : 1.239 
REMARK   3  REMARK   3  
REMARK   3  MOLPROBITY STATISTICS.
REMARK   3    ALL-ATOM CLASHSCORE : 3.29
REMARK   3    RAMACHANDRAN PLOT:
REMARK   3      OUTLIERS : 0.00  %
REMARK   3      ALLOWED  : 0.00  %
REMARK   3      FAVORED  : 100.00 %
REMARK   3    ROTAMER OUTLIERS : 2.30 %
REMARK   3    CBETA DEVIATIONS : 0
REMARK   3    PEPTIDE PLANE:
REMARK   3      CIS-PROLINE     : 33.3333333333
REMARK   3      CIS-GENERAL     : 0.0
REMARK   3      TWISTED PROLINE : 0.0
REMARK   3      TWISTED GENERAL : 0.0
REMARK   3  
REMARK   3  ATOMIC DISPLACEMENT PARAMETERS.
REMARK   3   WILSON B : 23.23
REMARK   3   RMS(B_ISO_OR_EQUIVALENT_BONDED) : 4.72
REMARK   3   ATOMS          NUMBER OF ATOMS
REMARK   3                    ISO.  ANISO. 
REMARK   3    ALL         :    968     769
REMARK   3    ALL (NO H)  :    968     769
REMARK   3    SOLVENT     :    195       0
REMARK   3    NON-SOLVENT :    773     769
REMARK   3    HYDROGENS   :      0       0
REMARK   3  
REMARK   3  
REMARK   3  TLS DETAILS.
REMARK   3   NUMBER OF TLS GROUPS: 4     
REMARK   3   ORIGIN: CENTER OF MASS
REMARK   3   TLS GROUP : 1     
REMARK   3    SELECTION: chain 'A' and (resid 4 through 38 )
REMARK   3    ORIGIN FOR THE GROUP (A): -40.5588   6.5843   8.3236
REMARK   3    T TENSOR                                            
REMARK   3      T11:   0.2448 T22:   0.0860                       
REMARK   3      T33:   0.1873 T12:   0.0047                       
REMARK   3      T13:  -0.0165 T23:  -0.0204                       
REMARK   3    L TENSOR                                            
REMARK   3      L11:   2.3836 L22:   4.1247                       
REMARK   3      L33:   4.3256 L12:  -1.0531                       
REMARK   3      L13:  -0.2702 L23:   1.6091                       
REMARK   3    S TENSOR                                            
REMARK   3      S11:  -0.0219 S12:   0.0667 S13:   0.0214         
REMARK   3      S21:   0.0500 S22:   0.2763 S23:  -0.2298         
REMARK   3      S31:   0.4649 S32:   0.1250 S33:  -0.1366         
REMARK   3   TLS GROUP : 2     
REMARK   3    SELECTION: chain 'A' and (resid 39 through 60 )
REMARK   3    ORIGIN FOR THE GROUP (A): -45.8624  11.6465  -1.2326
REMARK   3    T TENSOR                                            
REMARK   3      T11:   0.3116 T22:   0.2234                       
REMARK   3      T33:   0.2131 T12:  -0.0281                       
REMARK   3      T13:  -0.0563 T23:   0.0398                       
REMARK   3    L TENSOR                                            
REMARK   3      L11:   3.2282 L22:   4.4368                       
REMARK   3      L33:   2.5233 L12:   0.2571                       
REMARK   3      L13:   0.1463 L23:   1.0348                       
REMARK   3    S TENSOR                                            
REMARK   3      S11:  -0.0704 S12:   0.5210 S13:   0.2984         
REMARK   3      S21:  -0.7997 S22:   0.1120 S23:   0.4792         
REMARK   3      S31:  -0.1186 S32:  -0.1165 S33:  -0.1127         
REMARK   3   TLS GROUP : 3     
REMARK   3    SELECTION: chain 'A' and (resid 61 through 87 )
REMARK   3    ORIGIN FOR THE GROUP (A): -41.7096   9.4569   0.9463
REMARK   3    T TENSOR                                            
REMARK   3      T11:   0.3109 T22:   0.1311                       
REMARK   3      T33:   0.1585 T12:  -0.0384                       
REMARK   3      T13:   0.0351 T23:  -0.0019                       
REMARK   3    L TENSOR                                            
REMARK   3      L11:   2.3732 L22:   1.8770                       
REMARK   3      L33:   1.5301 L12:  -0.4361                       
REMARK   3      L13:  -0.0913 L23:   0.1718                       
REMARK   3    S TENSOR                                            
REMARK   3      S11:  -0.0403 S12:   0.5203 S13:   0.2300         
REMARK   3      S21:  -0.5676 S22:   0.2656 S23:  -0.0698         
REMARK   3      S31:   0.0541 S32:  -0.1440 S33:  -0.0313         
REMARK   3   TLS GROUP : 4     
REMARK   3    SELECTION: chain 'A' and (resid 88 through 99 )
REMARK   3    ORIGIN FOR THE GROUP (A): -34.1158   9.6517   1.0041
REMARK   3    T TENSOR                                            
REMARK   3      T11:   0.3335 T22:   0.1964                       
REMARK   3      T33:   0.3032 T12:  -0.0201                       
REMARK   3      T13:   0.0959 T23:  -0.0472                       
REMARK   3    L TENSOR                                            
REMARK   3      L11:   5.2264 L22:   6.4340                       
REMARK   3      L33:   3.7054 L12:  -3.2393                       
REMARK   3      L13:  -2.9643 L23:   4.6409                       
REMARK   3    S TENSOR                                            
REMARK   3      S11:   0.3116 S12:   0.4282 S13:   0.2753         
REMARK   3      S21:  -0.7818 S22:   0.2994 S23:  -0.8724         
REMARK   3      S31:  -0.5484 S32:   0.0607 S33:  -0.6114         

REMARK   3
CRYST1   84.847   84.847   49.177  90.00  90.00 120.00 P 32 2 1
SCALE1      0.011786  0.006805  0.000000        0.00000
SCALE2      0.000000  0.013609  0.000000        0.00000
SCALE3      0.000000  0.000000  0.020335        0.00000
ATOM      1  N   THR A   4     -48.448  11.480  28.935  1.00 62.84           N
ANISOU    1  N   THR A   4    10515   7518   5842   1360    822     23       N
ATOM      2  CA  THR A   4     -47.530  11.867  27.869  1.00 57.59           C
ANISOU    2  CA  THR A   4     9612   6814   5454   1341    550    -91       C
ATOM      3  C   THR A   4     -47.909  13.234  27.308  1.00 49.47           C
ANISOU    3  C   THR A   4     8243   5865   4689   1306    553   -210       C
ATOM      4  O   THR A   4     -48.954  13.382  26.679  1.00 43.84           O
ANISOU    4  O   THR A   4     7311   5214   4131   1147    742   -126       O
ATOM      5  CB  THR A   4     -47.530  10.830  26.718  1.00 57.27           C
ANISOU    5  CB  THR A   4     9486   6696   5580   1129    561     53       C
ATOM      6  OG1 THR A   4     -47.146   9.545  27.226  1.00 65.00           O
ANISOU    6  OG1 THR A   4    10820   7560   6317   1178    551    166       O
ATOM      7  CG2 THR A   4     -46.568  11.243  25.617  1.00 47.36           C
ANISOU    7  CG2 THR A   4     7987   5410   4596   1110    311    -63       C
ATOM      8  N   LEU A   5     -47.062  14.232  27.546  1.00 43.56           N
ANISOU    8  N   LEU A   5     7458   5106   3988   1460    335   -417       N
ATOM      9  CA  LEU A   5     -47.298  15.569  27.019  1.00 32.86           C
ANISOU    9  CA  LEU A   5     5836   3770   2879   1440    323   -533       C
ATOM     10  C   LEU A   5     -47.124  15.595  25.499  1.00 27.53           C
ANISOU   10  C   LEU A   5     4896   3049   2516   1257    266   -480       C
ATOM     11  O   LEU A   5     -46.413  14.756  24.925  1.00 34.19           O
ANISOU   11  O   LEU A   5     5752   3837   3400   1184    158   -431       O
ATOM     12  CB  LEU A   5     -46.336  16.568  27.657  1.00 37.81           C
ANISOU   12  CB  LEU A   5     6500   4365   3503   1604     95   -772       C
ATOM     13  CG  LEU A   5     -46.447  16.729  29.176  1.00 45.82           C
ANISOU   13  CG  LEU A   5     7710   5443   4257   1754     97   -811       C
ATOM     14  CD1 LEU A   5     -45.286  17.546  29.717  1.00 54.39           C
ANISOU   14  CD1 LEU A   5     8747   6508   5409   1830   -189  -1007       C
ATOM     15  CD2 LEU A   5     -47.773  17.374  29.541  1.00 47.76           C
ANISOU   15  CD2 LEU A   5     7924   5766   4458   1778    358   -791       C
ATOM     16  N   ASP A   6     -47.767  16.558  24.847  1.00 32.04           N
ANISOU   16  N   ASP A   6     5249   3637   3288   1208    337   -492       N
ATOM     17  CA  ASP A   6     -47.526  16.764  23.419  1.00 25.13           C
ANISOU   17  CA  ASP A   6     4163   2706   2678   1069    270   -455       C
ATOM     18  C   ASP A   6     -46.038  16.974  23.174  1.00 30.54           C
ANISOU   18  C   ASP A   6     4855   3290   3459   1080     46   -591       C
ATOM     19  O   ASP A   6     -45.338  17.549  24.005  1.00 28.06           O
ANISOU   19  O   ASP A   6     4626   2945   3091   1207    -75   -769       O
ATOM     20  CB  ASP A   6     -48.291  17.979  22.892  1.00 25.84           C
ANISOU   20  CB  ASP A   6     4077   2800   2940   1082    339   -474       C
ATOM     21  CG  ASP A   6     -49.779  17.743  22.805  1.00 32.42           C
ANISOU   21  CG  ASP A   6     4804   3765   3751   1050    545   -351       C
ATOM     22  OD1 ASP A   6     -50.212  16.581  22.954  1.00 32.45           O
ANISOU   22  OD1 ASP A   6     4847   3841   3644    953    653   -235       O
ATOM     23  OD2 ASP A   6     -50.514  18.730  22.574  1.00 31.17           O
ANISOU   23  OD2 ASP A   6     4516   3632   3697   1123    599   -382       O
ATOM     24  N   HIS A   7     -45.552  16.523  22.024  1.00 24.15           N
ANISOU   24  N   HIS A   7     3939   2440   2798    947     -7   -528       N
ATOM     25  CA  HIS A   7     -44.138  16.663  21.716  1.00 22.16           C
ANISOU   25  CA  HIS A   7     3647   2115   2660    938   -186   -665       C
ATOM     26  C   HIS A   7     -43.891  16.682  20.213  1.00 20.64           C
ANISOU   26  C   HIS A   7     3291   1876   2676    779   -171   -594       C
ATOM     27  O   HIS A   7     -44.687  16.163  19.438  1.00 21.93           O
ANISOU   27  O   HIS A   7     3412   2074   2847    686    -69   -429       O
ATOM     28  CB  HIS A   7     -43.331  15.528  22.361  1.00 23.90           C
ANISOU   28  CB  HIS A   7     4015   2354   2710   1022   -310   -700       C
ATOM     29  CG  HIS A   7     -43.672  14.163  21.845  1.00 21.12           C
ANISOU   29  CG  HIS A   7     3723   2014   2286    939   -241   -515       C
ATOM     30  ND1 HIS A   7     -43.176  13.675  20.654  1.00 22.71           N
ANISOU   30  ND1 HIS A   7     3813   2184   2632    824   -273   -475       N
ATOM     31  CD2 HIS A   7     -44.469  13.190  22.348  1.00 27.50           C
ANISOU   31  CD2 HIS A   7     4704   2847   2897    942   -124   -368       C
ATOM     32  CE1 HIS A   7     -43.643  12.454  20.454  1.00 24.76           C
ANISOU   32  CE1 HIS A   7     4179   2441   2789    768   -205   -324       C
ATOM     33  NE2 HIS A   7     -44.430  12.136  21.466  1.00 27.58           N
ANISOU   33  NE2 HIS A   7     4708   2823   2948    823   -108   -252       N
ATOM     34  N   ALA A   8     -42.778  17.295  19.827  1.00 22.72           N
ANISOU   34  N   ALA A   8     3464   2065   3104    743   -269   -734       N
ATOM     35  CA  ALA A   8     -42.375  17.379  18.430  1.00 19.65           C
ANISOU   35  CA  ALA A   8     2947   1625   2895    596   -236   -681       C
ATOM     36  C   ALA A   8     -42.132  15.989  17.845  1.00 18.70           C
ANISOU   36  C   ALA A   8     2835   1556   2715    548   -250   -587       C
ATOM     37  O   ALA A   8     -41.716  15.061  18.545  1.00 22.45           O
ANISOU   37  O   ALA A   8     3402   2068   3059    635   -339   -626       O
ATOM     38  CB  ALA A   8     -41.125  18.222  18.299  1.00 22.42           C
ANISOU   38  CB  ALA A   8     3192   1913   3413    534   -299   -851       C
ATOM     39  N   PRO A   9     -42.363  15.852  16.542  1.00 20.30           N
ANISOU   39  N   PRO A   9     2968   1745   3001    428   -172   -467       N
ATOM     40  CA  PRO A   9     -42.106  14.549  15.935  1.00 18.61           C
ANISOU   40  CA  PRO A   9     2773   1562   2734    384   -188   -400       C
ATOM     41  C   PRO A   9     -40.642  14.139  16.104  1.00 18.39           C
ANISOU   41  C   PRO A   9     2710   1529   2748    431   -306   -562       C
ATOM     42  O   PRO A   9     -39.742  14.985  16.008  1.00 20.28           O
ANISOU   42  O   PRO A   9     2830   1736   3138    406   -334   -708       O
ATOM     43  CB  PRO A   9     -42.398  14.811  14.453  1.00 17.52           C
ANISOU   43  CB  PRO A   9     2559   1405   2693    260    -99   -295       C
ATOM     44  CG  PRO A   9     -43.363  15.963  14.451  1.00 18.84           C
ANISOU   44  CG  PRO A   9     2710   1552   2896    269    -31   -237       C
ATOM     45  CD  PRO A   9     -42.883  16.840  15.577  1.00 20.56           C
ANISOU   45  CD  PRO A   9     2937   1724   3151    351    -76   -389       C
ATOM     46  N   ARG A  10     -40.411  12.855  16.351  1.00 19.73           N
ANISOU   46  N   ARG A  10     2977   1722   2796    499   -373   -545       N
ATOM     47  CA  ARG A  10     -39.065  12.306  16.393  1.00 21.48           C
ANISOU   47  CA  ARG A  10     3154   1955   3052    581   -500   -698       C
ATOM     48  C   ARG A  10     -39.057  11.015  15.580  1.00 21.87           C
ANISOU   48  C   ARG A  10     3269   1994   3048    558   -480   -604       C
ATOM     49  O   ARG A  10     -39.946  10.167  15.714  1.00 20.87           O
ANISOU   49  O   ARG A  10     3309   1841   2778    550   -442   -457       O
ATOM     50  CB  ARG A  10     -38.607  12.057  17.829  1.00 30.88           C
ANISOU   50  CB  ARG A  10     4437   3191   4104    758   -652   -798       C
ATOM     51  CG  ARG A  10     -39.582  11.271  18.644  1.00 30.44           C
ANISOU   51  CG  ARG A  10     4648   3099   3817    848   -636   -667       C
ATOM     52  CD  ARG A  10     -39.306  11.416  20.152  1.00 37.51           C
ANISOU   52  CD  ARG A  10     5658   4045   4548   1021   -761   -753       C
ATOM     53  NE  ARG A  10     -40.249  10.597  20.900  1.00 37.64           N
ANISOU   53  NE  ARG A  10     5983   4003   4318   1105   -700   -611       N
ATOM     54  CZ  ARG A  10     -40.886  10.980  21.998  1.00 38.45           C
ANISOU   54  CZ  ARG A  10     6231   4122   4255   1184   -660   -595       C
ATOM     55  NH1 ARG A  10     -40.675  12.185  22.515  1.00 36.91           N
ANISOU   55  NH1 ARG A  10     5919   3986   4119   1218   -713   -736       N
ATOM     56  NH2 ARG A  10     -41.732  10.143  22.579  1.00 42.32           N
ANISOU   56  NH2 ARG A  10     6978   4578   4523   1199   -545   -425       N
ATOM     57  N   ILE A  11     -38.064  10.884  14.716  1.00 19.60           N
ANISOU   57  N   ILE A  11     2846   1721   2882    533   -489   -699       N
ATOM     58  CA  ILE A  11     -37.992   9.723  13.847  1.00 18.64           C
ANISOU   58  CA  ILE A  11     2785   1581   2715    521   -468   -636       C
ATOM     59  C   ILE A  11     -37.119   8.682  14.519  1.00 21.59           C
ANISOU   59  C   ILE A  11     3229   1977   2997    704   -616   -726       C
ATOM     60  O   ILE A  11     -35.954   8.943  14.826  1.00 28.38           O
ANISOU   60  O   ILE A  11     3929   2917   3935    790   -712   -895       O
ATOM     61  CB  ILE A  11     -37.461  10.119  12.466  1.00 20.75           C
ANISOU   61  CB  ILE A  11     2884   1871   3130    398   -359   -669       C
ATOM     62  CG1 ILE A  11     -38.457  11.085  11.806  1.00 20.91           C
ANISOU   62  CG1 ILE A  11     2889   1873   3183    238   -219   -526       C
ATOM     63  CG2 ILE A  11     -37.210   8.864  11.594  1.00 22.99           C
ANISOU   63  CG2 ILE A  11     3236   2144   3357    420   -353   -650       C
ATOM     64  CD1 ILE A  11     -37.990  11.707  10.509  1.00 26.05           C
ANISOU   64  CD1 ILE A  11     3424   2525   3948    118    -87   -533       C
ATOM     65  N   THR A  12     -37.704   7.515  14.774  1.00 20.25           N
ANISOU   65  N   THR A  12     3289   1745   2658    748   -630   -601       N
ATOM     66  CA  THR A  12     -37.009   6.448  15.491  1.00 22.56           C
ANISOU   66  CA  THR A  12     3705   2048   2819    928   -768   -636       C
ATOM     67  C   THR A  12     -36.480   5.323  14.594  1.00 24.70           C
ANISOU   67  C   THR A  12     4000   2295   3091    955   -773   -645       C
ATOM     68  O   THR A  12     -35.646   4.523  15.026  1.00 27.90           O
ANISOU   68  O   THR A  12     4461   2719   3419   1126   -905   -711       O
ATOM     69  CB  THR A  12     -37.901   5.822  16.577  1.00 26.41           C
ANISOU   69  CB  THR A  12     4491   2456   3087    981   -776   -498       C
ATOM     70  OG1 THR A  12     -39.012   5.162  15.958  1.00 28.70           O
ANISOU   70  OG1 THR A  12     4927   2641   3337    826   -638   -335       O
ATOM     71  CG2 THR A  12     -38.393   6.887  17.561  1.00 28.05           C
ANISOU   71  CG2 THR A  12     4701   2691   3264    994   -772   -506       C
ATOM     72  N   LEU A  13     -36.990   5.239  13.368  1.00 21.85           N
ANISOU   72  N   LEU A  13     3618   1888   2797    802   -643   -584       N
ATOM     73  CA  LEU A  13     -36.476   4.301  12.373  1.00 24.47           C
ANISOU   73  CA  LEU A  13     3959   2201   3139    823   -631   -618       C
ATOM     74  C   LEU A  13     -36.376   5.068  11.070  1.00 20.80           C
ANISOU   74  C   LEU A  13     3316   1766   2822    697   -513   -674       C
ATOM     75  O   LEU A  13     -37.376   5.614  10.587  1.00 22.17           O
ANISOU   75  O   LEU A  13     3515   1900   3007    538   -421   -573       O
ATOM     76  CB  LEU A  13     -37.411   3.105  12.162  1.00 22.13           C
ANISOU   76  CB  LEU A  13     3917   1783   2710    755   -593   -471       C
ATOM     77  CG  LEU A  13     -36.978   2.240  10.967  1.00 26.90           C
ANISOU   77  CG  LEU A  13     4530   2361   3332    758   -568   -519       C
ATOM     78  CD1 LEU A  13     -35.717   1.467  11.318  1.00 31.55           C
ANISOU   78  CD1 LEU A  13     5120   2978   3891    980   -689   -630       C
ATOM     79  CD2 LEU A  13     -38.088   1.311  10.517  1.00 34.23           C
ANISOU   79  CD2 LEU A  13     5663   3172   4170    617   -509   -391       C
ATOM     80  N   ARG A  14     -35.172   5.127  10.517  1.00 24.75           N
ANISOU   80  N   ARG A  14     3635   2342   3426    771   -512   -835       N
ATOM     81  CA  ARG A  14     -34.946   5.960   9.346  1.00 22.98           C
ANISOU   81  CA  ARG A  14     3236   2156   3338    647   -367   -900       C
ATOM     82  C   ARG A  14     -35.001   5.152   8.057  1.00 22.46           C
ANISOU   82  C   ARG A  14     3254   2067   3214    613   -281   -877       C
ATOM     83  O   ARG A  14     -34.749   3.948   8.054  1.00 24.68           O
ANISOU   83  O   ARG A  14     3667   2299   3410    740   -355   -906       O
ATOM     84  CB  ARG A  14     -33.607   6.689   9.466  1.00 29.92           C
ANISOU   84  CB  ARG A  14     3820   3149   4397    702   -364  -1115       C
ATOM     85  CG  ARG A  14     -33.585   7.680  10.639  1.00 30.26           C
ANISOU   85  CG  ARG A  14     3770   3225   4505    696   -444  -1150       C
ATOM     86  CD  ARG A  14     -32.576   8.810  10.463  1.00 41.63           C
ANISOU   86  CD  ARG A  14     4893   4751   6173    618   -369  -1342       C
ATOM     87  NE  ARG A  14     -32.774   9.856  11.472  1.00 42.35           N
ANISOU   87  NE  ARG A  14     4935   4835   6322    579   -434  -1370       N
ATOM     88  CZ  ARG A  14     -33.411  11.005  11.254  1.00 42.23           C
ANISOU   88  CZ  ARG A  14     4916   4769   6361    386   -299  -1263       C
ATOM     89  NH1 ARG A  14     -33.903  11.280  10.054  1.00 37.31           N
ANISOU   89  NH1 ARG A  14     4338   4107   5732    222   -101  -1111       N
ATOM     90  NH2 ARG A  14     -33.545  11.891  12.235  1.00 43.44           N
ANISOU   90  NH2 ARG A  14     5040   4904   6562    380   -373  -1317       N
ATOM     91  N   MET A  15     -35.342   5.832   6.965  1.00 23.29           N
ANISOU   91  N   MET A  15     3299   2211   3338    438   -119   -806       N
ATOM     92  CA  MET A  15     -35.348   5.203   5.650  1.00 22.16           C
ANISOU   92  CA  MET A  15     3235   2067   3120    407    -30   -802       C
ATOM     93  C   MET A  15     -33.989   4.660   5.240  1.00 29.23           C
ANISOU   93  C   MET A  15     4014   3020   4071    554      0  -1002       C
ATOM     94  O   MET A  15     -32.946   5.166   5.661  1.00 29.07           O
ANISOU   94  O   MET A  15     3762   3087   4198    619      9  -1153       O
ATOM     95  CB  MET A  15     -35.818   6.199   4.600  1.00 25.36           C
ANISOU   95  CB  MET A  15     3603   2516   3517    227    136   -696       C
ATOM     96  CG  MET A  15     -37.308   6.466   4.630  1.00 26.41           C
ANISOU   96  CG  MET A  15     3869   2604   3561    111     98   -509       C
ATOM     97  SD  MET A  15     -37.745   7.594   3.284  1.00 33.87           S
ANISOU   97  SD  MET A  15     4810   3596   4462    -30    263   -393       S
ATOM     98  CE  MET A  15     -37.118   9.050   4.086  1.00 16.23           C
ANISOU   98  CE  MET A  15     2382   1371   2415    -65    338   -420       C
ATOM     99  N   ARG A  16     -34.022   3.637   4.393  1.00 23.95           N
ANISOU   99  N   ARG A  16     3495   2311   3294    605     15  -1024       N
ATOM    100  CA  ARG A  16     -32.821   2.980   3.895  1.00 24.71           C
ANISOU  100  CA  ARG A  16     3504   2462   3421    772     52  -1222       C
ATOM    101  C   ARG A  16     -32.598   3.314   2.434  1.00 29.63           C
ANISOU  101  C   ARG A  16     4079   3169   4009    666    278  -1236       C
ATOM    102  O   ARG A  16     -33.467   3.075   1.602  1.00 30.75           O
ANISOU  102  O   ARG A  16     4423   3261   4001    569    312  -1121       O
ATOM    103  CB  ARG A  16     -32.966   1.459   3.995  1.00 35.53           C
ANISOU  103  CB  ARG A  16     5115   3716   4669    912    -82  -1220       C
ATOM    104  CG  ARG A  16     -32.923   0.902   5.408  1.00 49.54           C
ANISOU  104  CG  ARG A  16     6942   5445   6436   1012   -267  -1153       C
ATOM    105  CD  ARG A  16     -31.687   0.031   5.602  1.00 62.29           C
ANISOU  105  CD  ARG A  16     8487   7112   8069   1231   -343  -1281       C
ATOM    106  NE  ARG A  16     -31.682  -0.642   6.897  1.00 72.59           N
ANISOU  106  NE  ARG A  16     9913   8358   9309   1355   -536  -1217       N
ATOM    107  CZ  ARG A  16     -32.320  -1.781   7.147  1.00 79.30           C
ANISOU  107  CZ  ARG A  16    11047   9057  10025   1372   -612  -1102       C
ATOM    108  NH1 ARG A  16     -33.019  -2.370   6.187  1.00 85.65           N
ANISOU  108  NH1 ARG A  16    12014   9761  10769   1261   -531  -1052       N
ATOM    109  NH2 ARG A  16     -32.261  -2.333   8.354  1.00 75.93           N
ANISOU  109  NH2 ARG A  16    10756   8579   9514   1497   -768  -1047       N
ATOM    110  N   SER A  17     -31.422   3.837   2.113  1.00 29.78           N
ANISOU  110  N   SER A  17     3835   3321   4160    687    434  -1389       N
ATOM    111  CA  SER A  17     -31.061   4.020   0.716  1.00 30.82           C
ANISOU  111  CA  SER A  17     3946   3532   4232    614    685  -1417       C
ATOM    112  C   SER A  17     -30.942   2.644   0.077  1.00 33.65           C
ANISOU  112  C   SER A  17     4485   3853   4447    786    641  -1513       C
ATOM    113  O   SER A  17     -30.343   1.735   0.648  1.00 36.26           O
ANISOU  113  O   SER A  17     4792   4163   4824   1005    499  -1660       O
ATOM    114  CB  SER A  17     -29.748   4.800   0.593  1.00 36.75           C
ANISOU  114  CB  SER A  17     4347   4434   5181    586    892  -1586       C
ATOM    115  OG  SER A  17     -29.883   6.112   1.133  1.00 34.20           O
ANISOU  115  OG  SER A  17     3887   4112   4996    402    940  -1504       O
ATOM    116  N   HIS A  18     -31.518   2.474  -1.105  1.00 29.43           N
ANISOU  116  N   HIS A  18     4156   3302   3724    704    746  -1432       N
ATOM    117  CA  HIS A  18     -31.470   1.166  -1.734  1.00 33.99           C
ANISOU  117  CA  HIS A  18     4936   3823   4157    860    696  -1538       C
ATOM    118  C   HIS A  18     -31.602   1.186  -3.250  1.00 34.48           C
ANISOU  118  C   HIS A  18     5138   3940   4022    796    891  -1527       C
ATOM    119  O   HIS A  18     -31.854   2.222  -3.869  1.00 33.49           O
ANISOU  119  O   HIS A  18     4999   3884   3843    627   1064  -1401       O
ATOM    120  CB  HIS A  18     -32.508   0.215  -1.114  1.00 37.92           C
ANISOU  120  CB  HIS A  18     5704   4129   4574    887    429  -1456       C
ATOM    121  CG  HIS A  18     -33.928   0.628  -1.345  1.00 34.76           C
ANISOU  121  CG  HIS A  18     5470   3673   4063    670    380  -1247       C
ATOM    122  ND1 HIS A  18     -34.533   1.644  -0.635  1.00 34.04           N
ANISOU  122  ND1 HIS A  18     5283   3597   4055    526    352  -1088       N
ATOM    123  CD2 HIS A  18     -34.869   0.156  -2.198  1.00 34.75           C
ANISOU  123  CD2 HIS A  18     5708   3613   3881    589    337  -1194       C
ATOM    124  CE1 HIS A  18     -35.781   1.785  -1.045  1.00 31.22           C
ANISOU  124  CE1 HIS A  18     5081   3203   3579    379    299   -943       C
ATOM    125  NE2 HIS A  18     -36.011   0.893  -1.990  1.00 33.84           N
ANISOU  125  NE2 HIS A  18     5610   3496   3754    407    279  -1009       N
ATOM    126  N   ARG A  19     -31.411   0.009  -3.828  1.00 34.18           N
ANISOU  126  N   ARG A  19     5269   3858   3861    956    857  -1666       N
ATOM    127  CA  ARG A  19     -31.499  -0.188  -5.266  1.00 37.09           C
ANISOU  127  CA  ARG A  19     5815   4274   4002    944   1015  -1696       C
ATOM    128  C   ARG A  19     -32.775  -0.947  -5.572  1.00 44.47           C
ANISOU  128  C   ARG A  19     7045   5076   4776    872    786  -1600       C
ATOM    129  O   ARG A  19     -33.304  -1.664  -4.720  1.00 41.58           O
ANISOU  129  O   ARG A  19     6734   4571   4493    869    550  -1561       O
ATOM    130  CB  ARG A  19     -30.304  -0.997  -5.770  1.00 41.07           C
ANISOU  130  CB  ARG A  19     6193   4866   4546   1113   1113  -1912       C
ATOM    131  CG  ARG A  19     -28.958  -0.330  -5.574  1.00 50.37           C
ANISOU  131  CG  ARG A  19     7068   6196   5876   1204   1333  -1981       C
ATOM    135  N   VAL A  20     -33.272  -0.781  -6.789  1.00 39.08           N
ANISOU  135  N   VAL A  20     6537   4444   3868    798    865  -1553       N
ATOM    136  CA  VAL A  20     -34.414  -1.548  -7.251  1.00 40.96           C
ANISOU  136  CA  VAL A  20     7014   4588   3962    733    651  -1509       C
ATOM    137  C   VAL A  20     -34.251  -1.765  -8.744  1.00 39.85           C
ANISOU  137  C   VAL A  20     7002   4547   3594    770    766  -1576       C
ATOM    138  O   VAL A  20     -33.877  -0.843  -9.471  1.00 39.74           O
ANISOU  138  O   VAL A  20     6973   4667   3461    753    999  -1532       O
ATOM    139  CB  VAL A  20     -35.749  -0.835  -6.952  1.00 42.46           C
ANISOU  139  CB  VAL A  20     7302   4730   4101    558    525  -1329       C
ATOM    140  CG1 VAL A  20     -35.856   0.458  -7.738  1.00 39.66           C
ANISOU  140  CG1 VAL A  20     6962   4508   3599    482    713  -1207       C
ATOM    141  CG2 VAL A  20     -36.931  -1.753  -7.252  1.00 36.86           C
ANISOU  141  CG2 VAL A  20     6762   3929   3313    478    279  -1320       C
ATOM    142  N   PRO A  21     -34.474  -3.004  -9.201  1.00 42.23           N
ANISOU  142  N   PRO A  21     7434   4774   3839    818    623  -1679       N
ATOM    143  CA  PRO A  21     -34.424  -3.271 -10.641  1.00 47.18           C
ANISOU  143  CA  PRO A  21     8208   5489   4230    857    702  -1753       C
ATOM    144  C   PRO A  21     -35.498  -2.480 -11.380  1.00 47.05           C
ANISOU  144  C   PRO A  21     8349   5533   3998    737    658  -1609       C
ATOM    145  O   PRO A  21     -36.618  -2.341 -10.885  1.00 41.25           O
ANISOU  145  O   PRO A  21     7657   4722   3295    617    455  -1506       O
ATOM    146  CB  PRO A  21     -34.722  -4.771 -10.729  1.00 47.02           C
ANISOU  146  CB  PRO A  21     8310   5324   4231    895    504  -1874       C
ATOM    147  CG  PRO A  21     -34.310  -5.318  -9.406  1.00 43.02           C
ANISOU  147  CG  PRO A  21     7679   4686   3980    945    427  -1890       C
ATOM    148  CD  PRO A  21     -34.632  -4.236  -8.409  1.00 43.54           C
ANISOU  148  CD  PRO A  21     7619   4767   4159    848    419  -1734       C
ATOM    149  N   CYS A  22     -35.145  -1.959 -12.550  1.00 50.84           N
ANISOU  149  N   CYS A  22     8903   6155   4260    774    850  -1599       N
ATOM    150  CA  CYS A  22     -36.099  -1.274 -13.411  1.00 54.59           C
ANISOU  150  CA  CYS A  22     9553   6694   4496    704    794  -1465       C
ATOM    151  C   CYS A  22     -37.388  -2.079 -13.535  1.00 42.53           C
ANISOU  151  C   CYS A  22     8153   5081   2926    644    459  -1504       C
ATOM    152  O   CYS A  22     -37.354  -3.288 -13.765  1.00 48.49           O
ANISOU  152  O   CYS A  22     8961   5766   3697    685    354  -1665       O
ATOM    153  CB  CYS A  22     -35.477  -1.033 -14.789  1.00 64.06           C
ANISOU  153  CB  CYS A  22    10859   8035   5447    785   1020  -1487       C
ATOM    154  SG  CYS A  22     -36.644  -0.994 -16.178  1.00 72.75           S
ANISOU  154  SG  CYS A  22    12241   9195   6207    784    839  -1437       S
ATOM    155  N   GLY A  23     -38.520  -1.404 -13.357  1.00 41.95           N
ANISOU  155  N   GLY A  23     8108   5014   2818    540    298  -1365       N
ATOM    156  CA  GLY A  23     -39.820  -2.025 -13.521  1.00 42.76           C
ANISOU  156  CA  GLY A  23     8278   5073   2896    459     -9  -1411       C
ATOM    157  C   GLY A  23     -40.452  -2.604 -12.270  1.00 44.71           C
ANISOU  157  C   GLY A  23     8409   5174   3405    335   -195  -1424       C
ATOM    158  O   GLY A  23     -41.653  -2.874 -12.246  1.00 41.23           O
ANISOU  158  O   GLY A  23     7968   4714   2982    223   -427  -1436       O
ATOM    159  N   GLN A  24     -39.655  -2.803 -11.227  1.00 37.84           N
ANISOU  159  N   GLN A  24     7427   4207   2743    354    -90  -1426       N
ATOM    160  CA  GLN A  24     -40.203  -3.323  -9.985  1.00 36.08           C
ANISOU  160  CA  GLN A  24     7113   3836   2759    243   -237  -1407       C
ATOM    161  C   GLN A  24     -40.802  -2.190  -9.164  1.00 37.98           C
ANISOU  161  C   GLN A  24     7253   4106   3070    142   -265  -1243       C
ATOM    162  O   GLN A  24     -40.568  -1.014  -9.449  1.00 34.86           O
ANISOU  162  O   GLN A  24     6859   3824   2562    178   -139  -1144       O
ATOM    163  CB  GLN A  24     -39.138  -4.068  -9.176  1.00 43.48           C
ANISOU  163  CB  GLN A  24     7985   4656   3880    335   -147  -1472       C
ATOM    164  CG  GLN A  24     -38.708  -5.391  -9.797  1.00 51.50           C
ANISOU  164  CG  GLN A  24     9106   5600   4862    424   -164  -1640       C
ATOM    165  CD  GLN A  24     -38.029  -6.320  -8.806  1.00 57.26           C
ANISOU  165  CD  GLN A  24     9790   6173   5793    497   -162  -1682       C
ATOM    166  OE1 GLN A  24     -38.057  -6.089  -7.594  1.00 47.92           O
ANISOU  166  OE1 GLN A  24     8506   4925   4778    461   -183  -1580       O
ATOM    167  NE2 GLN A  24     -37.417  -7.382  -9.318  1.00 59.30           N
ANISOU  167  NE2 GLN A  24    10139   6370   6022    614   -142  -1830       N
ATOM    168  N   ASN A  25     -41.585  -2.554  -8.155  1.00 34.10           N
ANISOU  168  N   ASN A  25     6684   3508   2763     10   -409  -1209       N
ATOM    169  CA  ASN A  25     -42.115  -1.585  -7.203  1.00 31.80           C
ANISOU  169  CA  ASN A  25     6283   3230   2570    -85   -433  -1067       C
ATOM    170  C   ASN A  25     -41.189  -1.519  -6.016  1.00 35.27           C
ANISOU  170  C   ASN A  25     6630   3581   3191    -32   -310  -1031       C
ATOM    171  O   ASN A  25     -40.469  -2.466  -5.725  1.00 33.25           O
ANISOU  171  O   ASN A  25     6377   3230   3025     50   -279  -1108       O
ATOM    172  CB  ASN A  25     -43.497  -2.011  -6.714  1.00 40.22           C
ANISOU  172  CB  ASN A  25     7286   4248   3748   -268   -632  -1055       C
ATOM    173  CG  ASN A  25     -44.419  -2.406  -7.848  1.00 44.19           C
ANISOU  173  CG  ASN A  25     7845   4829   4116   -317   -792  -1151       C
ATOM    174  OD1 ASN A  25     -44.475  -1.737  -8.877  1.00 46.89           O
ANISOU  174  OD1 ASN A  25     8250   5317   4248   -235   -803  -1144       O
ATOM    175  ND2 ASN A  25     -45.146  -3.505  -7.664  1.00 51.19           N
ANISOU  175  ND2 ASN A  25     8713   5618   5118   -447   -908  -1243       N
ATOM    176  N   THR A  26     -41.205  -0.403  -5.310  1.00 28.18           N
ANISOU  176  N   THR A  26     5602   2732   2371    -61   -250   -900       N
ATOM    177  CA  THR A  26     -40.389  -0.331  -4.115  1.00 27.11           C
ANISOU  177  CA  THR A  26     5339   2531   2429     -5   -164   -871       C
ATOM    178  C   THR A  26     -41.053   0.502  -3.031  1.00 25.13           C
ANISOU  178  C   THR A  26     4917   2301   2329   -107   -199   -710       C
ATOM    179  O   THR A  26     -41.995   1.245  -3.289  1.00 26.37           O
ANISOU  179  O   THR A  26     5022   2549   2448   -195   -251   -610       O
ATOM    180  CB  THR A  26     -38.985   0.207  -4.439  1.00 30.26           C
ANISOU  180  CB  THR A  26     5655   3018   2824    139     50   -907       C
ATOM    181  OG1 THR A  26     -38.078  -0.156  -3.391  1.00 31.48           O
ANISOU  181  OG1 THR A  26     5714   3098   3149    239     77   -965       O
ATOM    182  CG2 THR A  26     -39.011   1.714  -4.631  1.00 28.60           C
ANISOU  182  CG2 THR A  26     5312   2943   2612     92    176   -755       C
ATOM    183  N   ARG A  27     -40.559   0.363  -1.811  1.00 24.14           N
ANISOU  183  N   ARG A  27     4717   2095   2361    -67   -181   -696       N
ATOM    184  CA  ARG A  27     -41.081   1.146  -0.698  1.00 22.95           C
ANISOU  184  CA  ARG A  27     4418   1963   2340   -140   -197   -560       C
ATOM    185  C   ARG A  27     -39.953   1.746   0.105  1.00 21.26           C
ANISOU  185  C   ARG A  27     4062   1769   2246    -28    -97   -558       C
ATOM    186  O   ARG A  27     -38.886   1.138   0.230  1.00 24.43           O
ANISOU  186  O   ARG A  27     4485   2124   2671    108    -67   -675       O
ATOM    187  CB  ARG A  27     -41.895   0.252   0.234  1.00 20.96           C
ANISOU  187  CB  ARG A  27     4246   1569   2149   -235   -311   -546       C
ATOM    188  CG  ARG A  27     -43.238  -0.134  -0.302  1.00 24.07           C
ANISOU  188  CG  ARG A  27     4696   1963   2487   -406   -419   -547       C
ATOM    189  CD  ARG A  27     -43.971  -1.104   0.614  1.00 26.18           C
ANISOU  189  CD  ARG A  27     4999   2105   2842   -521   -466   -520       C
ATOM    190  NE  ARG A  27     -45.277  -1.423   0.045  1.00 29.08           N
ANISOU  190  NE  ARG A  27     5353   2504   3192   -705   -561   -550       N
ATOM    191  CZ  ARG A  27     -46.007  -2.482   0.378  1.00 34.50           C
ANISOU  191  CZ  ARG A  27     6064   3102   3943   -831   -580   -564       C
ATOM    192  NH1 ARG A  27     -45.550  -3.345   1.278  1.00 31.49           N
ANISOU  192  NH1 ARG A  27     5770   2582   3612   -779   -515   -529       N
ATOM    193  NH2 ARG A  27     -47.186  -2.683  -0.202  1.00 34.09           N
ANISOU  193  NH2 ARG A  27     5951   3104   3899  -1004   -671   -625       N
ATOM    194  N   PHE A  28     -40.215   2.931   0.655  1.00 18.39           N
ANISOU  194  N   PHE A  28     3547   1477   1964    -75    -60   -444       N
ATOM    195  CA  PHE A  28     -39.429   3.502   1.745  1.00 18.05           C
ANISOU  195  CA  PHE A  28     3360   1437   2060     -5    -17   -447       C
ATOM    196  C   PHE A  28     -40.311   3.477   2.981  1.00 20.34           C
ANISOU  196  C   PHE A  28     3653   1671   2406    -62   -111   -359       C
ATOM    197  O   PHE A  28     -41.501   3.755   2.906  1.00 18.91           O
ANISOU  197  O   PHE A  28     3473   1514   2199   -178   -148   -264       O
ATOM    198  CB  PHE A  28     -39.030   4.944   1.442  1.00 19.99           C
ANISOU  198  CB  PHE A  28     3454   1784   2356    -27    117   -396       C
ATOM    199  CG  PHE A  28     -37.938   5.078   0.396  1.00 21.96           C
ANISOU  199  CG  PHE A  28     3679   2093   2571     22    274   -485       C
ATOM    200  CD1 PHE A  28     -36.608   4.920   0.748  1.00 23.60           C
ANISOU  200  CD1 PHE A  28     3758   2319   2889    123    343   -627       C
ATOM    201  CD2 PHE A  28     -38.246   5.392  -0.915  1.00 24.67           C
ANISOU  201  CD2 PHE A  28     4120   2487   2766    -24    358   -433       C
ATOM    202  CE1 PHE A  28     -35.600   5.055  -0.194  1.00 28.80           C
ANISOU  202  CE1 PHE A  28     4358   3051   3532    154    525   -722       C
ATOM    203  CE2 PHE A  28     -37.238   5.521  -1.873  1.00 27.02           C
ANISOU  203  CE2 PHE A  28     4414   2842   3011     14    546   -507       C
ATOM    204  CZ  PHE A  28     -35.917   5.353  -1.507  1.00 28.30           C
ANISOU  204  CZ  PHE A  28     4418   3027   3307     90    647   -654       C
ATOM    205  N   ILE A  29     -39.727   3.159   4.123  1.00 18.03           N
ANISOU  205  N   ILE A  29     3356   1315   2179     36   -149   -399       N
ATOM    206  CA  ILE A  29     -40.511   3.065   5.356  1.00 17.61           C
ANISOU  206  CA  ILE A  29     3345   1201   2146     -6   -211   -313       C
ATOM    207  C   ILE A  29     -39.743   3.759   6.467  1.00 20.01           C
ANISOU  207  C   ILE A  29     3536   1534   2533    108   -215   -340       C
ATOM    208  O   ILE A  29     -38.535   3.597   6.578  1.00 19.72           O
ANISOU  208  O   ILE A  29     3453   1505   2536    253   -228   -461       O
ATOM    209  CB  ILE A  29     -40.775   1.597   5.742  1.00 22.42           C
ANISOU  209  CB  ILE A  29     4164   1663   2692      3   -280   -323       C
ATOM    210  CG1 ILE A  29     -41.578   0.890   4.646  1.00 20.54           C
ANISOU  210  CG1 ILE A  29     4021   1396   2387   -132   -293   -327       C
ATOM    211  CG2 ILE A  29     -41.547   1.521   7.057  1.00 26.94           C
ANISOU  211  CG2 ILE A  29     4762   2208   3264    -46   -290   -214       C
ATOM    212  CD1 ILE A  29     -41.609  -0.630   4.778  1.00 25.00           C
ANISOU  212  CD1 ILE A  29     4734   1858   2905   -116   -328   -346       C
ATOM    213  N   LEU A  30     -40.444   4.548   7.274  1.00 17.23           N
ANISOU  213  N   LEU A  30     3124   1213   2211     50   -209   -249       N
ATOM    214  CA  LEU A  30     -39.821   5.117   8.469  1.00 18.10           C
ANISOU  214  CA  LEU A  30     3162   1338   2379    161   -241   -290       C
ATOM    215  C   LEU A  30     -40.830   5.098   9.597  1.00 17.86           C
ANISOU  215  C   LEU A  30     3219   1269   2298    123   -260   -187       C
ATOM    216  O   LEU A  30     -42.004   4.822   9.393  1.00 18.91           O
ANISOU  216  O   LEU A  30     3409   1387   2391    -12   -226    -88       O
ATOM    217  CB  LEU A  30     -39.286   6.527   8.229  1.00 19.85           C
ANISOU  217  CB  LEU A  30     3174   1656   2712    147   -173   -330       C
ATOM    218  CG  LEU A  30     -40.243   7.673   7.932  1.00 16.87           C
ANISOU  218  CG  LEU A  30     2726   1324   2358     24   -102   -216       C
ATOM    219  CD1 LEU A  30     -39.620   9.008   8.288  1.00 20.30           C
ANISOU  219  CD1 LEU A  30     3010   1790   2912     38    -57   -268       C
ATOM    220  CD2 LEU A  30     -40.580   7.670   6.429  1.00 18.36           C
ANISOU  220  CD2 LEU A  30     2932   1542   2500    -63    -38   -167       C
ATOM    221  N   ASN A  31     -40.361   5.331  10.819  1.00 17.67           N
ANISOU  221  N   ASN A  31     3206   1238   2271    248   -314   -225       N
ATOM    222  CA  ASN A  31     -41.272   5.386  11.940  1.00 20.72           C
ANISOU  222  CA  ASN A  31     3688   1598   2586    225   -301   -129       C
ATOM    223  C   ASN A  31     -41.088   6.691  12.689  1.00 19.95           C
ANISOU  223  C   ASN A  31     3452   1583   2545    279   -304   -167       C
ATOM    224  O   ASN A  31     -39.956   7.066  12.997  1.00 18.10           O
ANISOU  224  O   ASN A  31     3137   1375   2363    407   -379   -299       O
ATOM    225  CB  ASN A  31     -40.988   4.244  12.908  1.00 19.10           C
ANISOU  225  CB  ASN A  31     3703   1303   2252    346   -364   -122       C
ATOM    226  CG  ASN A  31     -42.028   4.143  13.991  1.00 21.33           C
ANISOU  226  CG  ASN A  31     4136   1540   2430    296   -302     -4       C
ATOM    227  OD1 ASN A  31     -43.126   3.639  13.776  1.00 22.83           O
ANISOU  227  OD1 ASN A  31     4390   1690   2595    124   -205     98       O
ATOM    228  ND2 ASN A  31     -41.686   4.632  15.170  1.00 24.90           N
ANISOU  228  ND2 ASN A  31     4630   2011   2820    442   -351    -34       N
ATOM    229  N   VAL A  32     -42.196   7.383  12.934  1.00 17.18           N
ANISOU  229  N   VAL A  32     3057   1276   2196    182   -226    -75       N
ATOM    230  CA  VAL A  32     -42.160   8.666  13.649  1.00 18.73           C
ANISOU  230  CA  VAL A  32     3147   1530   2441    233   -221   -114       C
ATOM    231  C   VAL A  32     -43.018   8.558  14.904  1.00 18.97           C
ANISOU  231  C   VAL A  32     3300   1556   2353    260   -186    -46       C
ATOM    232  O   VAL A  32     -44.077   7.919  14.901  1.00 19.21           O
ANISOU  232  O   VAL A  32     3408   1573   2320    155   -103     66       O
ATOM    233  CB  VAL A  32     -42.645   9.831  12.740  1.00 21.16           C
ANISOU  233  CB  VAL A  32     3286   1894   2862    131   -147    -80       C
ATOM    234  CG1 VAL A  32     -44.112   9.645  12.356  1.00 21.51           C
ANISOU  234  CG1 VAL A  32     3330   1973   2869     17    -76     49       C
ATOM    235  CG2 VAL A  32     -42.396  11.201  13.399  1.00 18.52           C
ANISOU  235  CG2 VAL A  32     2860   1575   2601    191   -147   -149       C
ATOM    236  N   GLN A  33     -42.543   9.176  15.994  1.00 17.64           N
ANISOU  236  N   GLN A  33     3148   1402   2152    394   -242   -129       N
ATOM    237  CA  GLN A  33     -43.311   9.312  17.217  1.00 18.45           C
ANISOU  237  CA  GLN A  33     3367   1518   2126    440   -188    -79       C
ATOM    238  C   GLN A  33     -43.712  10.773  17.301  1.00 17.70           C
ANISOU  238  C   GLN A  33     3108   1490   2126    430   -143   -117       C
ATOM    239  O   GLN A  33     -42.856  11.657  17.255  1.00 21.62           O
ANISOU  239  O   GLN A  33     3500   1988   2727    486   -221   -245       O
ATOM    240  CB  GLN A  33     -42.452   8.943  18.426  1.00 21.21           C
ANISOU  240  CB  GLN A  33     3897   1832   2329    640   -311   -165       C
ATOM    241  CG  GLN A  33     -42.018   7.471  18.438  1.00 22.06           C
ANISOU  241  CG  GLN A  33     4222   1840   2319    701   -371   -123       C
ATOM    242  CD  GLN A  33     -41.103   7.132  19.610  1.00 26.20           C
ANISOU  242  CD  GLN A  33     4942   2333   2679    956   -534   -216       C
ATOM    243  OE1 GLN A  33     -40.512   8.018  20.236  1.00 29.47           O
ANISOU  243  OE1 GLN A  33     5271   2820   3107   1082   -645   -362       O
ATOM    244  NE2 GLN A  33     -40.977   5.834  19.907  1.00 27.99           N
ANISOU  244  NE2 GLN A  33     5431   2463   2742   1027   -560   -140       N
ATOM    245  N   SER A  34     -45.010  11.030  17.368  1.00 18.76           N
ANISOU  245  N   SER A  34     3209   1674   2245    352    -12    -17       N
ATOM    246  CA  SER A  34     -45.505  12.408  17.296  1.00 19.33           C
ANISOU  246  CA  SER A  34     3133   1796   2415    363     32    -45       C
ATOM    247  C   SER A  34     -46.813  12.529  18.058  1.00 25.79           C
ANISOU  247  C   SER A  34     3964   2685   3147    364    167     22       C
ATOM    248  O   SER A  34     -47.685  11.682  17.926  1.00 27.24           O
ANISOU  248  O   SER A  34     4161   2903   3285    256    265    124       O
ATOM    249  CB  SER A  34     -45.713  12.801  15.817  1.00 20.12           C
ANISOU  249  CB  SER A  34     3077   1903   2664    258     42     -1       C
ATOM    250  OG  SER A  34     -46.159  14.132  15.669  1.00 23.68           O
ANISOU  250  OG  SER A  34     3424   2369   3204    293     74    -15       O
ATOM    251  N   LYS A  35     -46.941  13.561  18.887  1.00 23.47           N
ANISOU  251  N   LYS A  35     3665   2415   2836    480    183    -53       N
ATOM    252  CA  LYS A  35     -48.206  13.825  19.567  1.00 26.37           C
ANISOU  252  CA  LYS A  35     4012   2873   3135    500    336    -10       C
ATOM    253  C   LYS A  35     -48.427  15.333  19.668  1.00 23.43           C
ANISOU  253  C   LYS A  35     3535   2511   2855    609    333    -97       C
ATOM    254  O   LYS A  35     -47.664  16.023  20.318  1.00 24.07           O
ANISOU  254  O   LYS A  35     3692   2535   2919    723    251   -222       O
ATOM    255  CB  LYS A  35     -48.206  13.206  20.973  1.00 26.76           C
ANISOU  255  CB  LYS A  35     4283   2926   2959    578    398     -9       C
ATOM    256  CG  LYS A  35     -49.530  13.348  21.686  1.00 27.57           C
ANISOU  256  CG  LYS A  35     4363   3135   2977    577    609     39       C
ATOM    257  CD  LYS A  35     -49.444  12.842  23.128  1.00 31.02           C
ANISOU  257  CD  LYS A  35     5074   3563   3147    675    688     44       C
ATOM    258  CE  LYS A  35     -50.775  13.011  23.837  1.00 39.51           C
ANISOU  258  CE  LYS A  35     6113   4761   4138    663    947     86       C
ATOM    259  NZ  LYS A  35     -50.746  12.420  25.209  1.00 48.15           N
ANISOU  259  NZ  LYS A  35     7524   5840   4932    745   1066    121       N
ATOM    260  N   PRO A  36     -49.475  15.860  19.012  1.00 24.61           N
ANISOU  260  N   PRO A  36     3514   2729   3107    585    405    -46       N
ATOM    261  CA  PRO A  36     -50.439  15.143  18.175  1.00 27.77           C
ANISOU  261  CA  PRO A  36     3780   3221   3551    450    472     65       C
ATOM    262  C   PRO A  36     -49.823  14.557  16.909  1.00 24.28           C
ANISOU  262  C   PRO A  36     3324   2718   3182    332    365    113       C
ATOM    263  O   PRO A  36     -48.669  14.833  16.572  1.00 21.99           O
ANISOU  263  O   PRO A  36     3098   2324   2935    354    260     65       O
ATOM    264  CB  PRO A  36     -51.452  16.228  17.788  1.00 31.20           C
ANISOU  264  CB  PRO A  36     4031   3734   4089    536    506     54       C
ATOM    265  CG  PRO A  36     -50.752  17.516  17.988  1.00 33.52           C
ANISOU  265  CG  PRO A  36     4392   3912   4432    682    431    -38       C
ATOM    266  CD  PRO A  36     -49.787  17.297  19.109  1.00 27.50           C
ANISOU  266  CD  PRO A  36     3812   3081   3554    719    408   -121       C
ATOM    267  N  ATHR A  37     -50.599  13.727  16.227  0.53 25.73           N
ANISOU  267  N  ATHR A  37     3417   2976   3385    198    402    189       N
ATOM    268  CA ATHR A  37     -50.124  13.045  15.034  0.53 24.91           C
ANISOU  268  CA ATHR A  37     3320   2825   3322     87    311    225       C
ATOM    269  C  ATHR A  37     -49.629  14.030  13.984  0.53 22.53           C
ANISOU  269  C  ATHR A  37     2970   2476   3115    149    214    212       C
ATOM    270  O  ATHR A  37     -50.248  15.066  13.742  0.53 26.10           O
ANISOU  270  O  ATHR A  37     3325   2967   3626    240    215    214       O
ATOM    271  CB ATHR A  37     -51.211  12.152  14.445  0.53 26.74           C
ANISOU  271  CB ATHR A  37     3437   3153   3571    -66    353    279       C
ATOM    272  OG1ATHR A  37     -52.448  12.877  14.390  0.53 30.86           O
ANISOU  272  OG1ATHR A  37     3750   3818   4157    -20    401    271       O
ATOM    273  CG2ATHR A  37     -51.394  10.930  15.319  0.53 27.85           C
ANISOU  273  CG2ATHR A  37     3698   3269   3614   -182    465    310       C
ATOM    274  N  BTHR A  37     -50.620  13.740  16.226  0.47 25.65           N
ANISOU  274  N  BTHR A  37     3404   2967   3375    198    403    189       N
ATOM    275  CA BTHR A  37     -50.249  13.132  14.953  0.47 25.23           C
ANISOU  275  CA BTHR A  37     3336   2877   3372     89    312    228       C
ATOM    276  C  BTHR A  37     -49.547  14.135  14.059  0.47 22.30           C
ANISOU  276  C  BTHR A  37     2948   2437   3087    163    213    206       C
ATOM    277  O  BTHR A  37     -49.941  15.299  13.997  0.47 23.44           O
ANISOU  277  O  BTHR A  37     3024   2595   3289    270    215    193       O
ATOM    278  CB BTHR A  37     -51.500  12.629  14.213  0.47 26.42           C
ANISOU  278  CB BTHR A  37     3321   3151   3568    -29    341    273       C
ATOM    279  OG1BTHR A  37     -52.168  11.646  15.013  0.47 28.07           O
ANISOU  279  OG1BTHR A  37     3545   3404   3715   -148    474    296       O
ATOM    280  CG2BTHR A  37     -51.137  12.024  12.860  0.47 23.15           C
ANISOU  280  CG2BTHR A  37     2915   2701   3181   -125    232    296       C
ATOM    281  N   ALA A  38     -48.504  13.677  13.374  1.00 23.47           N
ANISOU  281  N   ALA A  38     3174   2503   3242    109    144    201       N
ATOM    282  CA  ALA A  38     -47.797  14.527  12.432  1.00 20.65           C
ANISOU  282  CA  ALA A  38     2814   2072   2959    139     95    192       C
ATOM    283  C   ALA A  38     -48.533  14.628  11.110  1.00 22.41           C
ANISOU  283  C   ALA A  38     2967   2350   3196    112     66    267       C
ATOM    284  O   ALA A  38     -49.140  13.663  10.647  1.00 26.43           O
ANISOU  284  O   ALA A  38     3437   2938   3667     24     45    298       O
ATOM    285  CB  ALA A  38     -46.397  13.972  12.184  1.00 24.37           C
ANISOU  285  CB  ALA A  38     3367   2459   3431     95     56    142       C
ATOM    286  N   GLU A  39     -48.462  15.812  10.522  1.00 23.27           N
ANISOU  286  N   GLU A  39     2440   2381   4020    132    446   -298       N
ATOM    287  CA  GLU A  39     -48.787  15.996   9.110  1.00 25.87           C
ANISOU  287  CA  GLU A  39     2751   2651   4429    136    267   -166       C
ATOM    288  C   GLU A  39     -47.533  15.592   8.357  1.00 20.94           C
ANISOU  288  C   GLU A  39     2296   2068   3592     84    204    -95       C
ATOM    289  O   GLU A  39     -46.426  16.000   8.732  1.00 22.27           O
ANISOU  289  O   GLU A  39     2538   2239   3683     79    263   -143       O
ATOM    290  CB  GLU A  39     -49.103  17.459   8.818  1.00 28.52           C
ANISOU  290  CB  GLU A  39     3009   2843   4984    213    207   -152       C
ATOM    291  CG  GLU A  39     -50.361  17.982   9.481  1.00 55.56           C
ANISOU  291  CG  GLU A  39     6232   6208   8669    289    270   -245       C
ATOM    292  CD  GLU A  39     -51.628  17.354   8.930  1.00 72.61           C
ANISOU  292  CD  GLU A  39     8241   8390  10957    291    172   -194       C
ATOM    293  OE1 GLU A  39     -51.671  17.055   7.717  1.00 77.60           O
ANISOU  293  OE1 GLU A  39     8925   9018  11541    270    -24    -58       O
ATOM    294  OE2 GLU A  39     -52.577  17.149   9.716  1.00 79.39           O
ANISOU  294  OE2 GLU A  39     8928   9275  11960    303    298   -301       O
ATOM    295  N   VAL A  40     -47.690  14.782   7.313  1.00 21.17           N
ANISOU  295  N   VAL A  40     2375   2134   3536     42     90     -2       N
ATOM    296  CA  VAL A  40     -46.537  14.254   6.600  1.00 17.56           C
ANISOU  296  CA  VAL A  40     2071   1730   2873     -7     63     38       C
ATOM    297  C   VAL A  40     -46.573  14.730   5.154  1.00 18.81           C
ANISOU  297  C   VAL A  40     2295   1844   3009    -21    -78    165       C
ATOM    298  O   VAL A  40     -47.623  14.674   4.493  1.00 24.58           O
ANISOU  298  O   VAL A  40     2978   2550   3812    -10   -216    231       O
ATOM    299  CB  VAL A  40     -46.520  12.705   6.645  1.00 17.80           C
ANISOU  299  CB  VAL A  40     2153   1844   2767    -51     72     14       C
ATOM    300  CG1 VAL A  40     -45.304  12.165   5.940  1.00 22.17           C
ANISOU  300  CG1 VAL A  40     2844   2447   3134    -82     62     22       C
ATOM    301  CG2 VAL A  40     -46.524  12.229   8.114  1.00 22.34           C
ANISOU  301  CG2 VAL A  40     2702   2452   3335    -41    210    -78       C
ATOM    302  N   LYS A  41     -45.437  15.236   4.683  1.00 17.66           N
ANISOU  302  N   LYS A  41     2256   1689   2765    -51    -46    198       N
ATOM    303  CA  LYS A  41     -45.281  15.548   3.262  1.00 17.96           C
ANISOU  303  CA  LYS A  41     2415   1705   2704    -88   -147    332       C
ATOM    304  C   LYS A  41     -44.089  14.789   2.703  1.00 19.58           C
ANISOU  304  C   LYS A  41     2746   2008   2684   -156    -74    307       C
ATOM    305  O   LYS A  41     -43.092  14.598   3.396  1.00 20.78           O
ANISOU  305  O   LYS A  41     2879   2201   2815   -164     55    206       O
ATOM    306  CB  LYS A  41     -45.097  17.054   3.052  1.00 21.29           C
ANISOU  306  CB  LYS A  41     2856   1992   3242    -76   -151    420       C
ATOM    307  CG  LYS A  41     -46.316  17.869   3.436  1.00 29.44           C
ANISOU  307  CG  LYS A  41     3760   2902   4524     14   -242    443       C
ATOM    308  CD  LYS A  41     -46.107  19.338   3.094  1.00 33.65           C
ANISOU  308  CD  LYS A  41     4344   3262   5179     29   -266    549       C
ATOM    309  CE  LYS A  41     -47.315  20.178   3.486  1.00 45.39           C
ANISOU  309  CE  LYS A  41     5687   4605   6955    147   -362    553       C
ATOM    310  NZ  LYS A  41     -48.550  19.687   2.821  1.00 58.37           N
ANISOU  310  NZ  LYS A  41     7274   6276   8629    200   -564    628       N
ATOM    311  N   TRP A  42     -44.195  14.366   1.441  1.00 18.64           N
ANISOU  311  N   TRP A  42     2751   1929   2400   -199   -164    386       N
ATOM    312  CA  TRP A  42     -43.127  13.616   0.805  1.00 20.44           C
ANISOU  312  CA  TRP A  42     3096   2253   2417   -258    -78    341       C
ATOM    313  C   TRP A  42     -42.597  14.388  -0.384  1.00 21.73           C
ANISOU  313  C   TRP A  42     3413   2401   2442   -326    -61    465       C
ATOM    314  O   TRP A  42     -43.361  15.061  -1.063  1.00 22.40           O
ANISOU  314  O   TRP A  42     3567   2420   2525   -322   -201    611       O
ATOM    315  CB  TRP A  42     -43.658  12.273   0.314  1.00 20.68           C
ANISOU  315  CB  TRP A  42     3173   2355   2329   -266   -171    293       C
ATOM    316  CG  TRP A  42     -43.853  11.239   1.404  1.00 18.82           C
ANISOU  316  CG  TRP A  42     2834   2137   2179   -230   -135    171       C
ATOM    317  CD1 TRP A  42     -45.000  10.975   2.090  1.00 21.57           C
ANISOU  317  CD1 TRP A  42     3070   2450   2676   -203   -204    162       C
ATOM    318  CD2 TRP A  42     -42.873  10.309   1.873  1.00 18.82           C
ANISOU  318  CD2 TRP A  42     2846   2185   2118   -221    -22     52       C
ATOM    319  NE1 TRP A  42     -44.788   9.940   2.987  1.00 17.97           N
ANISOU  319  NE1 TRP A  42     2584   2012   2230   -193   -126     64       N
ATOM    320  CE2 TRP A  42     -43.489   9.517   2.867  1.00 17.76           C
ANISOU  320  CE2 TRP A  42     2638   2030   2079   -191    -35      0       C
ATOM    321  CE3 TRP A  42     -41.533  10.067   1.553  1.00 19.81           C
ANISOU  321  CE3 TRP A  42     3028   2365   2135   -232     93    -16       C
ATOM    322  CZ2 TRP A  42     -42.805   8.485   3.524  1.00 18.26           C
ANISOU  322  CZ2 TRP A  42     2716   2108   2112   -162     34    -94       C
ATOM    323  CZ3 TRP A  42     -40.862   9.058   2.209  1.00 22.99           C
ANISOU  323  CZ3 TRP A  42     3407   2789   2540   -187    152   -134       C
ATOM    324  CH2 TRP A  42     -41.492   8.291   3.193  1.00 19.10           C
ANISOU  324  CH2 TRP A  42     2871   2259   2127   -147    110   -161       C
ATOM    325  N   TYR A  43     -41.294  14.280  -0.622  1.00 21.78           N
ANISOU  325  N   TYR A  43     3469   2465   2339   -386    111    409       N
ATOM    326  CA  TYR A  43     -40.640  15.005  -1.711  1.00 23.66           C
ANISOU  326  CA  TYR A  43     3862   2696   2433   -480    191    524       C
ATOM    327  C   TYR A  43     -39.728  14.086  -2.502  1.00 26.77           C
ANISOU  327  C   TYR A  43     4353   3222   2598   -541    322    434       C
ATOM    328  O   TYR A  43     -39.140  13.154  -1.956  1.00 25.08           O
ANISOU  328  O   TYR A  43     4041   3079   2411   -507    403    261       O
ATOM    329  CB  TYR A  43     -39.808  16.166  -1.145  1.00 27.30           C
ANISOU  329  CB  TYR A  43     4247   3068   3057   -520    337    535       C
ATOM    330  CG  TYR A  43     -40.612  17.159  -0.352  1.00 24.59           C
ANISOU  330  CG  TYR A  43     3812   2576   2954   -456    234    594       C
ATOM    331  CD1 TYR A  43     -41.032  18.356  -0.917  1.00 27.52           C
ANISOU  331  CD1 TYR A  43     4282   2801   3372   -478    167    783       C
ATOM    332  CD2 TYR A  43     -40.950  16.901   0.975  1.00 24.25           C
ANISOU  332  CD2 TYR A  43     3595   2530   3087   -369    212    459       C
ATOM    333  CE1 TYR A  43     -41.780  19.267  -0.187  1.00 25.17           C
ANISOU  333  CE1 TYR A  43     3887   2350   3327   -401     76    813       C
ATOM    334  CE2 TYR A  43     -41.697  17.806   1.707  1.00 26.81           C
ANISOU  334  CE2 TYR A  43     3832   2725   3631   -306    146    481       C
ATOM    335  CZ  TYR A  43     -42.103  18.984   1.125  1.00 25.76           C
ANISOU  335  CZ  TYR A  43     3772   2439   3575   -316     78    646       C
ATOM    336  OH  TYR A  43     -42.846  19.887   1.854  1.00 30.48           O
ANISOU  336  OH  TYR A  43     4269   2889   4421   -236     17    645       O
ATOM    337  N   HIS A  44     -39.629  14.346  -3.807  1.00 25.47           N
ANISOU  337  N   HIS A  44     4394   3085   2198   -626    339    551       N
ATOM    338  CA  HIS A  44     -38.660  13.675  -4.665  1.00 31.31           C
ANISOU  338  CA  HIS A  44     5241   3951   2705   -701    518    460       C
ATOM    339  C   HIS A  44     -37.752  14.740  -5.280  1.00 32.04           C
ANISOU  339  C   HIS A  44     5430   4019   2723   -830    723    574       C
ATOM    340  O   HIS A  44     -38.222  15.654  -5.964  1.00 34.33           O
ANISOU  340  O   HIS A  44     5895   4232   2917   -884    650    792       O
ATOM    341  CB  HIS A  44     -39.374  12.885  -5.764  1.00 30.22           C
ANISOU  341  CB  HIS A  44     5301   3891   2291   -708    375    475       C
ATOM    342  CG  HIS A  44     -38.448  12.220  -6.741  1.00 32.05           C
ANISOU  342  CG  HIS A  44     5671   4253   2252   -785    571    366       C
ATOM    343  ND1 HIS A  44     -38.792  12.005  -8.059  1.00 36.59           N
ANISOU  343  ND1 HIS A  44     6488   4900   2514   -836    503    421       N
ATOM    344  CD2 HIS A  44     -37.202  11.708  -6.591  1.00 31.40           C
ANISOU  344  CD2 HIS A  44     5493   4246   2191   -803    826    181       C
ATOM    345  CE1 HIS A  44     -37.795  11.397  -8.680  1.00 38.99           C
ANISOU  345  CE1 HIS A  44     6788   5308   2717   -860    711    263       C
ATOM    346  NE2 HIS A  44     -36.815  11.213  -7.815  1.00 35.38           N
ANISOU  346  NE2 HIS A  44     6140   4854   2449   -847    915    121       N
ATOM    347  N   ASN A  45     -36.454  14.638  -5.009  1.00 31.88           N
ANISOU  347  N   ASN A  45     5288   4052   2771   -880    975    431       N
ATOM    348  CA  ASN A  45     -35.512  15.697  -5.369  1.00 32.24           C
ANISOU  348  CA  ASN A  45     5364   4058   2828  -1023   1205    516       C
ATOM    349  C   ASN A  45     -36.035  17.117  -5.095  1.00 32.88           C
ANISOU  349  C   ASN A  45     5476   3951   3064  -1051   1110    731       C
ATOM    350  O   ASN A  45     -35.904  18.013  -5.928  1.00 38.21           O
ANISOU  350  O   ASN A  45     6321   4561   3636  -1158   1178    918       O
ATOM    351  CB  ASN A  45     -35.076  15.552  -6.831  1.00 36.30           C
ANISOU  351  CB  ASN A  45     6072   4674   3048  -1113   1334    558       C
ATOM    352  CG  ASN A  45     -34.320  14.262  -7.084  1.00 39.83           C
ANISOU  352  CG  ASN A  45     6437   5280   3418  -1075   1463    307       C
ATOM    353  OD1 ASN A  45     -33.554  13.801  -6.238  1.00 41.28           O
ANISOU  353  OD1 ASN A  45     6396   5494   3795  -1037   1573    112       O
ATOM    354  ND2 ASN A  45     -34.531  13.672  -8.253  1.00 41.35           N
ANISOU  354  ND2 ASN A  45     6801   5564   3346  -1073   1431    304       N
ATOM    355  N   GLY A  46     -36.639  17.311  -3.924  1.00 33.44           N
ANISOU  355  N   GLY A  46     5377   3931   3397   -935    944    691       N
ATOM    356  CA  GLY A  46     -37.039  18.640  -3.497  1.00 35.15           C
ANISOU  356  CA  GLY A  46     5582   3954   3820   -942    874    837       C
ATOM    357  C   GLY A  46     -38.425  19.074  -3.929  1.00 38.81           C
ANISOU  357  C   GLY A  46     6199   4311   4239   -873    617   1046       C
ATOM    358  O   GLY A  46     -38.880  20.160  -3.564  1.00 37.24           O
ANISOU  358  O   GLY A  46     5985   3927   4239   -848    533   1161       O
ATOM    359  N   VAL A  47     -39.104  18.228  -4.697  1.00 33.02           N
ANISOU  359  N   VAL A  47     5599   3684   3265   -833    477   1077       N
ATOM    360  CA  VAL A  47     -40.417  18.579  -5.231  1.00 34.01           C
ANISOU  360  CA  VAL A  47     5860   3725   3337   -764    198   1269       C
ATOM    361  C   VAL A  47     -41.488  17.736  -4.557  1.00 30.89           C
ANISOU  361  C   VAL A  47     5302   3374   3060   -622    -13   1147       C
ATOM    362  O   VAL A  47     -41.368  16.513  -4.489  1.00 30.93           O
ANISOU  362  O   VAL A  47     5260   3525   2967   -609     11    980       O
ATOM    363  CB  VAL A  47     -40.485  18.342  -6.743  1.00 37.79           C
ANISOU  363  CB  VAL A  47     6641   4288   3427   -842    158   1414       C
ATOM    364  CG1 VAL A  47     -41.839  18.774  -7.287  1.00 39.70           C
ANISOU  364  CG1 VAL A  47     6974   4449   3660   -739   -175   1592       C
ATOM    365  CG2 VAL A  47     -39.371  19.100  -7.444  1.00 41.80           C
ANISOU  365  CG2 VAL A  47     7234   4794   3855   -964    409   1485       C
ATOM    366  N   GLU A  48     -42.535  18.382  -4.056  1.00 31.97           N
ANISOU  366  N   GLU A  48     5348   3374   3426   -520   -206   1223       N
ATOM    367  CA  GLU A  48     -43.556  17.651  -3.316  1.00 31.11           C
ANISOU  367  CA  GLU A  48     5052   3299   3468   -404   -363   1099       C
ATOM    368  C   GLU A  48     -44.249  16.609  -4.187  1.00 28.58           C
ANISOU  368  C   GLU A  48     4831   3101   2928   -398   -543   1095       C
ATOM    369  O   GLU A  48     -44.627  16.884  -5.334  1.00 30.20           O
ANISOU  369  O   GLU A  48     5238   3298   2937   -419   -700   1260       O
ATOM    370  CB  GLU A  48     -44.585  18.594  -2.685  1.00 35.54           C
ANISOU  370  CB  GLU A  48     5481   3691   4333   -293   -518   1167       C
ATOM    371  CG  GLU A  48     -45.597  17.857  -1.809  1.00 37.37           C
ANISOU  371  CG  GLU A  48     5489   3964   4744   -194   -618   1021       C
ATOM    372  CD  GLU A  48     -46.454  18.785  -0.970  1.00 46.44           C
ANISOU  372  CD  GLU A  48     6461   4956   6228    -83   -692   1027       C
ATOM    373  OE1 GLU A  48     -46.314  20.017  -1.110  1.00 43.45           O
ANISOU  373  OE1 GLU A  48     6140   4412   5956    -69   -700   1152       O
ATOM    374  OE2 GLU A  48     -47.262  18.274  -0.162  1.00 51.00           O
ANISOU  374  OE2 GLU A  48     6841   5566   6970    -15   -725    901       O
ATOM    375  N   LEU A  49     -44.383  15.405  -3.639  1.00 28.88           N
ANISOU  375  N   LEU A  49     4741   3243   2989   -375   -525    907       N
ATOM    376  CA  LEU A  49     -45.071  14.311  -4.308  1.00 31.27           C
ANISOU  376  CA  LEU A  49     5102   3645   3135   -376   -693    857       C
ATOM    377  C   LEU A  49     -46.561  14.333  -3.989  1.00 31.22           C
ANISOU  377  C   LEU A  49     4938   3578   3346   -289   -946    876       C
ATOM    378  O   LEU A  49     -46.962  14.591  -2.854  1.00 37.60           O
ANISOU  378  O   LEU A  49     5532   4317   4438   -224   -909    822       O
ATOM    379  CB  LEU A  49     -44.484  12.959  -3.886  1.00 29.08           C
ANISOU  379  CB  LEU A  49     4769   3476   2805   -400   -548    644       C
ATOM    380  CG  LEU A  49     -43.085  12.586  -4.381  1.00 29.69           C
ANISOU  380  CG  LEU A  49     4979   3644   2659   -477   -320    572       C
ATOM    381  CD1 LEU A  49     -43.082  12.384  -5.900  1.00 30.32           C
ANISOU  381  CD1 LEU A  49     5319   3804   2399   -548   -390    634       C
ATOM    382  CD2 LEU A  49     -42.611  11.324  -3.673  1.00 30.34           C
ANISOU  382  CD2 LEU A  49     4952   3784   2791   -454   -207    361       C
ATOM    383  N   GLN A  50     -47.369  14.070  -5.011  1.00 36.45           N
ANISOU  383  N   GLN A  50     5706   4275   3869   -290  -1200    941       N
ATOM    384  CA  GLN A  50     -48.796  13.873  -4.833  1.00 38.12           C
ANISOU  384  CA  GLN A  50     5739   4454   4291   -220  -1457    923       C
ATOM    385  C   GLN A  50     -49.107  12.411  -5.112  1.00 37.47           C
ANISOU  385  C   GLN A  50     5652   4484   4101   -277  -1525    761       C
ATOM    386  O   GLN A  50     -48.412  11.764  -5.898  1.00 39.21           O
ANISOU  386  O   GLN A  50     6081   4800   4019   -352  -1472    714       O
ATOM    387  CB  GLN A  50     -49.581  14.755  -5.808  1.00 49.72           C
ANISOU  387  CB  GLN A  50     7313   5859   5721   -167  -1762   1123       C
ATOM    388  CG  GLN A  50     -49.648  16.220  -5.409  1.00 62.60           C
ANISOU  388  CG  GLN A  50     8893   7321   7573    -82  -1756   1280       C
ATOM    389  CD  GLN A  50     -50.507  16.443  -4.179  1.00 76.32           C
ANISOU  389  CD  GLN A  50    10293   8971   9733     20  -1759   1184       C
ATOM    390  OE1 GLN A  50     -50.024  16.374  -3.048  1.00 81.33           O
ANISOU  390  OE1 GLN A  50    10794   9598  10510     12  -1501   1061       O
ATOM    391  NE2 GLN A  50     -51.791  16.710  -4.395  1.00 82.75           N
ANISOU  391  NE2 GLN A  50    10966   9727  10749    118  -2053   1230       N
ATOM    392  N   GLU A  51     -50.149  11.886  -4.478  1.00 34.87           N
ANISOU  392  N   GLU A  51     5084   4136   4028   -248  -1626    664       N
ATOM    393  CA  GLU A  51     -50.585  10.527  -4.784  1.00 35.80           C
ANISOU  393  CA  GLU A  51     5191   4328   4085   -315  -1721    514       C
ATOM    394  C   GLU A  51     -51.077  10.409  -6.227  1.00 37.76           C
ANISOU  394  C   GLU A  51     5617   4634   4095   -342  -2030    562       C
ATOM    395  O   GLU A  51     -51.693  11.332  -6.771  1.00 41.24           O
ANISOU  395  O   GLU A  51     6076   5036   4555   -279  -2268    716       O
ATOM    396  CB  GLU A  51     -51.663  10.061  -3.810  1.00 35.08           C
ANISOU  396  CB  GLU A  51     4795   4192   4344   -303  -1751    413       C
ATOM    397  CG  GLU A  51     -51.155   9.969  -2.379  1.00 39.57           C
ANISOU  397  CG  GLU A  51     5236   4723   5077   -292  -1443    348       C
ATOM    398  CD  GLU A  51     -51.965   9.009  -1.533  1.00 51.94           C
ANISOU  398  CD  GLU A  51     6590   6272   6874   -336  -1403    220       C
ATOM    399  OE1 GLU A  51     -53.104   9.358  -1.157  1.00 57.99           O
ANISOU  399  OE1 GLU A  51     7120   6997   7917   -305  -1499    223       O
ATOM    400  OE2 GLU A  51     -51.462   7.901  -1.250  1.00 40.00           O
ANISOU  400  OE2 GLU A  51     5144   4777   5278   -403  -1269    118       O
ATOM    401  N   SER A  52     -50.783   9.268  -6.842  1.00 36.13           N
ANISOU  401  N   SER A  52     5556   4514   3659   -428  -2035    425       N
ATOM    402  CA  SER A  52     -51.143   9.019  -8.229  1.00 41.61           C
ANISOU  402  CA  SER A  52     6449   5284   4077   -465  -2295    427       C
ATOM    403  C   SER A  52     -51.147   7.515  -8.446  1.00 37.32           C
ANISOU  403  C   SER A  52     5923   4792   3463   -550  -2270    194       C
ATOM    404  O   SER A  52     -51.050   6.757  -7.489  1.00 42.33           O
ANISOU  404  O   SER A  52     6417   5383   4286   -582  -2131     69       O
ATOM    405  CB  SER A  52     -50.136   9.681  -9.169  1.00 44.86           C
ANISOU  405  CB  SER A  52     7153   5749   4143   -470  -2157    547       C
ATOM    406  OG  SER A  52     -48.849   9.107  -9.016  1.00 44.22           O
ANISOU  406  OG  SER A  52     7204   5719   3880   -533  -1860    443       O
ATOM    407  N   SER A  53     -51.266   7.072  -9.695  1.00 44.71           N
ANISOU  407  N   SER A  53     7017   5811   4160   -577  -2360    132       N
ATOM    408  CA  SER A  53     -51.189   5.643  -9.964  1.00 43.89           C
ANISOU  408  CA  SER A  53     6943   5741   3991   -651  -2318   -100       C
ATOM    409  C   SER A  53     -49.777   5.132  -9.680  1.00 43.35           C
ANISOU  409  C   SER A  53     7013   5686   3772   -678  -1994   -193       C
ATOM    410  O   SER A  53     -49.572   3.944  -9.430  1.00 56.94           O
ANISOU  410  O   SER A  53     8711   7380   5543   -721  -1902   -385       O
ATOM    411  CB  SER A  53     -51.604   5.334 -11.402  1.00 51.67           C
ANISOU  411  CB  SER A  53     8068   6824   4739   -667  -2492   -155       C
ATOM    412  OG  SER A  53     -50.797   6.045 -12.320  1.00 56.95           O
ANISOU  412  OG  SER A  53     8990   7575   5073   -646  -2399    -38       O
ATOM    413  N   LYS A  54     -48.808   6.042  -9.695  1.00 44.28           N
ANISOU  413  N   LYS A  54     7255   5830   3739   -649  -1813    -58       N
ATOM    414  CA  LYS A  54     -47.415   5.670  -9.466  1.00 38.43           C
ANISOU  414  CA  LYS A  54     6612   5112   2878   -662  -1490   -148       C
ATOM    415  C   LYS A  54     -46.990   5.773  -8.003  1.00 32.72           C
ANISOU  415  C   LYS A  54     5735   4304   2393   -638  -1324   -140       C
ATOM    416  O   LYS A  54     -46.192   4.960  -7.526  1.00 36.00           O
ANISOU  416  O   LYS A  54     6130   4701   2848   -634  -1110   -285       O
ATOM    417  CB  LYS A  54     -46.498   6.532 -10.329  1.00 56.24           C
ANISOU  417  CB  LYS A  54     9058   7449   4862   -660  -1332    -30       C
ATOM    418  CG  LYS A  54     -45.070   6.035 -10.387  1.00 61.89           C
ANISOU  418  CG  LYS A  54     9844   8214   5456   -672   -998   -162       C
ATOM    419  CD  LYS A  54     -44.301   6.763 -11.469  1.00 63.75           C
ANISOU  419  CD  LYS A  54    10259   8543   5421   -694   -855    -67       C
ATOM    420  CE  LYS A  54     -42.915   6.178 -11.640  1.00 56.69           C
ANISOU  420  CE  LYS A  54     9391   7710   4439   -701   -530   -231       C
ATOM    421  NZ  LYS A  54     -42.947   4.806 -12.197  1.00 48.60           N
ANISOU  421  NZ  LYS A  54     8391   6730   3346   -693   -548   -471       N
ATOM    422  N   ILE A  55     -47.538   6.760  -7.300  1.00 31.81           N
ANISOU  422  N   ILE A  55     5449   4128   2510   -586  -1379     26       N
ATOM    423  CA  ILE A  55     -47.092   7.098  -5.949  1.00 27.88           C
ANISOU  423  CA  ILE A  55     4761   3560   2271   -531  -1160     54       C
ATOM    424  C   ILE A  55     -48.212   6.946  -4.915  1.00 29.81           C
ANISOU  424  C   ILE A  55     4745   3720   2861   -506  -1254     49       C
ATOM    425  O   ILE A  55     -49.280   7.529  -5.075  1.00 28.75           O
ANISOU  425  O   ILE A  55     4516   3564   2845   -488  -1469    139       O
ATOM    426  CB  ILE A  55     -46.619   8.563  -5.906  1.00 36.82           C
ANISOU  426  CB  ILE A  55     5921   4682   3385   -495  -1078    241       C
ATOM    427  CG1 ILE A  55     -45.426   8.779  -6.841  1.00 47.46           C
ANISOU  427  CG1 ILE A  55     7512   6112   4408   -543   -919    256       C
ATOM    428  CG2 ILE A  55     -46.300   8.988  -4.486  1.00 34.82           C
ANISOU  428  CG2 ILE A  55     5466   4357   3407   -439   -895    253       C
ATOM    429  CD1 ILE A  55     -44.176   8.038  -6.433  1.00 41.03           C
ANISOU  429  CD1 ILE A  55     6688   5330   3572   -549   -636     92       C
ATOM    430  N   HIS A  56     -47.962   6.171  -3.861  1.00 29.04           N
ANISOU  430  N   HIS A  56     4534   3573   2927   -503  -1089    -53       N
ATOM    431  CA  HIS A  56     -48.900   6.061  -2.739  1.00 25.24           C
ANISOU  431  CA  HIS A  56     3817   3015   2757   -494  -1101    -51       C
ATOM    432  C   HIS A  56     -48.141   6.231  -1.432  1.00 22.54           C
ANISOU  432  C   HIS A  56     3402   2639   2523   -444   -850    -44       C
ATOM    433  O   HIS A  56     -47.039   5.714  -1.287  1.00 24.09           O
ANISOU  433  O   HIS A  56     3699   2847   2609   -433   -696   -112       O
ATOM    434  CB  HIS A  56     -49.561   4.680  -2.699  1.00 28.48           C
ANISOU  434  CB  HIS A  56     4184   3383   3256   -571  -1173   -188       C
ATOM    435  CG  HIS A  56     -50.300   4.320  -3.946  1.00 37.69           C
ANISOU  435  CG  HIS A  56     5420   4585   4317   -634  -1441   -242       C
ATOM    436  ND1 HIS A  56     -50.269   3.051  -4.483  1.00 46.83           N
ANISOU  436  ND1 HIS A  56     6682   5726   5383   -710  -1492   -404       N
ATOM    437  CD2 HIS A  56     -51.102   5.052  -4.752  1.00 44.22           C
ANISOU  437  CD2 HIS A  56     6232   5455   5116   -626  -1697   -163       C
ATOM    438  CE1 HIS A  56     -51.010   3.021  -5.578  1.00 45.67           C
ANISOU  438  CE1 HIS A  56     6586   5627   5138   -758  -1768   -437       C
ATOM    439  NE2 HIS A  56     -51.527   4.223  -5.763  1.00 45.76           N
ANISOU  439  NE2 HIS A  56     6527   5679   5180   -703  -1908   -283       N
ATOM    440  N   TYR A  57     -48.741   6.920  -0.471  1.00 21.87           N
ANISOU  440  N   TYR A  57     3137   2512   2659   -407   -818     19       N
ATOM    441  CA  TYR A  57     -48.136   6.973   0.856  1.00 23.38           C
ANISOU  441  CA  TYR A  57     3270   2677   2936   -367   -602      6       C
ATOM    442  C   TYR A  57     -49.168   6.882   1.966  1.00 25.87           C
ANISOU  442  C   TYR A  57     3395   2941   3494   -377   -563      1       C
ATOM    443  O   TYR A  57     -50.313   7.301   1.809  1.00 27.17           O
ANISOU  443  O   TYR A  57     3414   3091   3820   -385   -683     29       O
ATOM    444  CB  TYR A  57     -47.231   8.202   1.042  1.00 22.43           C
ANISOU  444  CB  TYR A  57     3180   2575   2767   -304   -501     74       C
ATOM    445  CG  TYR A  57     -47.764   9.508   0.482  1.00 29.44           C
ANISOU  445  CG  TYR A  57     4035   3448   3703   -276   -622    189       C
ATOM    446  CD1 TYR A  57     -48.690  10.273   1.184  1.00 36.84           C
ANISOU  446  CD1 TYR A  57     4793   4329   4876   -231   -648    227       C
ATOM    447  CD2 TYR A  57     -47.312   9.990  -0.736  1.00 30.19           C
ANISOU  447  CD2 TYR A  57     4290   3574   3605   -291   -700    262       C
ATOM    448  CE1 TYR A  57     -49.161  11.473   0.672  1.00 41.63           C
ANISOU  448  CE1 TYR A  57     5372   4890   5555   -183   -777    335       C
ATOM    449  CE2 TYR A  57     -47.780  11.182  -1.258  1.00 37.18           C
ANISOU  449  CE2 TYR A  57     5179   4419   4528   -259   -829    397       C
ATOM    450  CZ  TYR A  57     -48.700  11.919  -0.550  1.00 44.23           C
ANISOU  450  CZ  TYR A  57     5884   5235   5687   -196   -880    434       C
ATOM    451  OH  TYR A  57     -49.153  13.106  -1.080  1.00 49.94           O
ANISOU  451  OH  TYR A  57     6613   5889   6473   -143  -1026    572       O
ATOM    452  N   THR A  58     -48.746   6.331   3.100  1.00 22.53           N
ANISOU  452  N   THR A  58     2971   2492   3095   -374   -390    -37       N
ATOM    453  CA  THR A  58     -49.655   6.105   4.209  1.00 24.52           C
ANISOU  453  CA  THR A  58     3077   2703   3535   -406   -302    -44       C
ATOM    454  C   THR A  58     -48.980   6.409   5.536  1.00 23.23           C
ANISOU  454  C   THR A  58     2932   2543   3351   -352   -109    -39       C
ATOM    455  O   THR A  58     -47.752   6.446   5.616  1.00 19.08           O
ANISOU  455  O   THR A  58     2530   2040   2679   -299    -62    -48       O
ATOM    456  CB  THR A  58     -50.125   4.643   4.264  1.00 25.18           C
ANISOU  456  CB  THR A  58     3181   2727   3658   -505   -304    -95       C
ATOM    457  OG1 THR A  58     -48.986   3.779   4.375  1.00 26.13           O
ANISOU  457  OG1 THR A  58     3486   2823   3618   -487   -238   -126       O
ATOM    458  CG2 THR A  58     -50.925   4.277   3.017  1.00 33.49           C
ANISOU  458  CG2 THR A  58     4200   3778   4749   -574   -518   -131       C
ATOM    459  N   ASN A  59     -49.797   6.638   6.566  1.00 23.84           N
ANISOU  459  N   ASN A  59     2877   2605   3577   -367      0    -38       N
ATOM    460  CA  ASN A  59     -49.331   6.802   7.941  1.00 23.23           C
ANISOU  460  CA  ASN A  59     2834   2537   3455   -331    182    -46       C
ATOM    461  C   ASN A  59     -50.210   5.923   8.807  1.00 24.63           C
ANISOU  461  C   ASN A  59     2968   2676   3716   -422    307    -47       C
ATOM    462  O   ASN A  59     -51.404   6.174   8.943  1.00 28.53           O
ANISOU  462  O   ASN A  59     3279   3163   4400   -471    343    -61       O
ATOM    463  CB  ASN A  59     -49.435   8.265   8.405  1.00 24.16           C
ANISOU  463  CB  ASN A  59     2845   2680   3653   -258    234    -57       C
ATOM    464  CG  ASN A  59     -48.938   8.466   9.834  1.00 28.04           C
ANISOU  464  CG  ASN A  59     3391   3195   4067   -224    408    -91       C
ATOM    465  OD1 ASN A  59     -48.700   7.506  10.561  1.00 26.77           O
ANISOU  465  OD1 ASN A  59     3339   3032   3801   -258    491    -83       O
ATOM    466  ND2 ASN A  59     -48.758   9.726  10.229  1.00 24.35           N
ANISOU  466  ND2 ASN A  59     2867   2741   3644   -156    448   -130       N
ATOM    467  N   THR A  60     -49.629   4.869   9.362  1.00 24.81           N
ANISOU  467  N   THR A  60     3153   2662   3611   -446    374    -28       N
ATOM    468  CA  THR A  60     -50.378   3.959  10.211  1.00 28.64           C
ANISOU  468  CA  THR A  60     3644   3089   4150   -551    515     -1       C
ATOM    469  C   THR A  60     -49.801   4.046  11.616  1.00 29.14           C
ANISOU  469  C   THR A  60     3836   3176   4059   -508    676     28       C
ATOM    470  O   THR A  60     -48.816   3.381  11.943  1.00 25.61           O
ANISOU  470  O   THR A  60     3585   2698   3447   -464    655     63       O
ATOM    471  CB  THR A  60     -50.301   2.513   9.680  1.00 30.03           C
ANISOU  471  CB  THR A  60     3937   3162   4311   -630    443     16       C
ATOM    472  OG1 THR A  60     -50.703   2.487   8.308  1.00 35.65           O
ANISOU  472  OG1 THR A  60     4558   3871   5118   -660    263    -33       O
ATOM    473  CG2 THR A  60     -51.217   1.596  10.483  1.00 36.53           C
ANISOU  473  CG2 THR A  60     4754   3898   5227   -773    600     59       C
ATOM    474  N   SER A  61     -50.400   4.900  12.441  1.00 28.42           N
ANISOU  474  N   SER A  61     3948   3035   3817    -14   -130    311       N
ATOM    475  CA  SER A  61     -49.937   5.094  13.815  1.00 31.39           C
ANISOU  475  CA  SER A  61     4301   3406   4219    129    -58    274       C
ATOM    476  C   SER A  61     -48.455   5.473  13.917  1.00 27.72           C
ANISOU  476  C   SER A  61     3907   2876   3749    211    -17    135       C
ATOM    477  O   SER A  61     -47.783   5.134  14.897  1.00 33.20           O
ANISOU  477  O   SER A  61     4625   3549   4440    303     23     71       O
ATOM    478  CB  SER A  61     -50.214   3.844  14.658  1.00 38.12           C
ANISOU  478  CB  SER A  61     5171   4250   5065    114    -37    310       C
ATOM    479  OG  SER A  61     -51.578   3.468  14.578  1.00 51.09           O
ANISOU  479  OG  SER A  61     6731   5948   6731     24    -68    437       O
ATOM    480  N   GLY A  62     -47.949   6.192  12.921  1.00 21.40           N
ANISOU  480  N   GLY A  62     3133   2050   2948    182    -26     94       N
ATOM    481  CA  GLY A  62     -46.560   6.620  12.941  1.00 22.62           C
ANISOU  481  CA  GLY A  62     3332   2144   3118    245     20    -35       C
ATOM    482  C   GLY A  62     -45.638   5.815  12.033  1.00 16.09           C
ANISOU  482  C   GLY A  62     2570   1298   2244    154     21   -115       C
ATOM    483  O   GLY A  62     -44.504   6.215  11.788  1.00 19.12           O
ANISOU  483  O   GLY A  62     2891   1724   2649    161     48   -196       O
ATOM    484  N   VAL A  63     -46.119   4.680  11.544  1.00 17.99           N
ANISOU  484  N   VAL A  63     2908   1494   2434     61    -18    -88       N
ATOM    485  CA  VAL A  63     -45.355   3.961  10.522  1.00 17.51           C
ANISOU  485  CA  VAL A  63     2889   1440   2322    -19    -15   -164       C
ATOM    486  C   VAL A  63     -45.690   4.607   9.180  1.00 17.14           C
ANISOU  486  C   VAL A  63     2920   1373   2222   -110    -43   -130       C
ATOM    487  O   VAL A  63     -46.847   4.573   8.762  1.00 18.17           O
ANISOU  487  O   VAL A  63     3020   1559   2324   -184   -111    -27       O
ATOM    488  CB  VAL A  63     -45.710   2.474  10.479  1.00 18.15           C
ANISOU  488  CB  VAL A  63     3027   1492   2377    -91    -47   -165       C
ATOM    489  CG1 VAL A  63     -44.907   1.773   9.380  1.00 20.43           C
ANISOU  489  CG1 VAL A  63     3345   1798   2619   -145    -40   -249       C
ATOM    490  CG2 VAL A  63     -45.440   1.809  11.830  1.00 22.76           C
ANISOU  490  CG2 VAL A  63     3563   2080   3007     -4    -20   -170       C
ATOM    491  N   LEU A  64     -44.688   5.204   8.530  1.00 16.68           N
ANISOU  491  N   LEU A  64     2853   1335   2152    -94      9   -190       N
ATOM    492  CA  LEU A  64     -44.885   5.968   7.298  1.00 16.88           C
ANISOU  492  CA  LEU A  64     2940   1358   2116   -165      0   -140       C
ATOM    493  C   LEU A  64     -44.325   5.144   6.157  1.00 20.01           C
ANISOU  493  C   LEU A  64     3452   1745   2406   -256      8   -222       C
ATOM    494  O   LEU A  64     -43.190   4.692   6.248  1.00 19.60           O
ANISOU  494  O   LEU A  64     3334   1734   2379   -201     66   -307       O
ATOM    495  CB  LEU A  64     -44.118   7.285   7.362  1.00 17.04           C
ANISOU  495  CB  LEU A  64     2920   1352   2202    -93     75   -151       C
ATOM    496  CG  LEU A  64     -44.348   8.091   8.640  1.00 19.07           C
ANISOU  496  CG  LEU A  64     3058   1611   2576     21     82   -126       C
ATOM    497  CD1 LEU A  64     -43.593   9.404   8.495  1.00 20.98           C
ANISOU  497  CD1 LEU A  64     3233   1847   2890     64    135   -138       C
ATOM    498  CD2 LEU A  64     -45.831   8.319   8.850  1.00 19.66           C
ANISOU  498  CD2 LEU A  64     3079   1737   2653     17     10     12       C
ATOM    499  N   THR A  65     -45.102   4.953   5.090  1.00 18.53           N
ANISOU  499  N   THR A  65     3306   1620   2114   -358    -62   -160       N
ATOM    500  CA  THR A  65     -44.626   4.172   3.941  1.00 17.93           C
ANISOU  500  CA  THR A  65     3349   1549   1916   -444    -59   -252       C
ATOM    501  C   THR A  65     -44.867   4.977   2.678  1.00 22.21           C
ANISOU  501  C   THR A  65     3924   2175   2342   -496    -73   -170       C
ATOM    502  O   THR A  65     -45.954   5.540   2.499  1.00 23.01           O
ANISOU  502  O   THR A  65     3970   2343   2428   -516   -156    -35       O
ATOM    503  CB  THR A  65     -45.358   2.811   3.824  1.00 20.21           C
ANISOU  503  CB  THR A  65     3681   1831   2166   -534   -150   -287       C
ATOM    504  OG1 THR A  65     -45.239   2.091   5.068  1.00 23.36           O
ANISOU  504  OG1 THR A  65     3987   2200   2687   -451   -126   -302       O
ATOM    505  CG2 THR A  65     -44.781   1.955   2.687  1.00 25.17           C
ANISOU  505  CG2 THR A  65     4377   2494   2692   -579   -131   -386       C
ATOM    506  N   LEU A  66     -43.841   5.050   1.830  1.00 19.85           N
ANISOU  506  N   LEU A  66     3706   1874   1960   -510     13   -246       N
ATOM    507  CA  LEU A  66     -43.978   5.599   0.481  1.00 17.38           C
ANISOU  507  CA  LEU A  66     3457   1650   1495   -568      7   -176       C
ATOM    508  C   LEU A  66     -43.802   4.438  -0.467  1.00 20.73           C
ANISOU  508  C   LEU A  66     4004   2108   1765   -652    -15   -299       C
ATOM    509  O   LEU A  66     -42.836   3.695  -0.361  1.00 24.38           O
ANISOU  509  O   LEU A  66     4516   2507   2242   -638     63   -452       O
ATOM    510  CB  LEU A  66     -42.901   6.647   0.193  1.00 18.90           C
ANISOU  510  CB  LEU A  66     3653   1822   1708   -521    147   -160       C
ATOM    511  CG  LEU A  66     -42.842   7.131  -1.274  1.00 21.53           C
ANISOU  511  CG  LEU A  66     4074   2248   1857   -577    172    -86       C
ATOM    512  CD1 LEU A  66     -44.115   7.883  -1.612  1.00 25.94           C
ANISOU  512  CD1 LEU A  66     4601   2885   2372   -590     55    106       C
ATOM    513  CD2 LEU A  66     -41.615   8.024  -1.517  1.00 22.41           C
ANISOU  513  CD2 LEU A  66     4186   2319   2008   -543    341    -83       C
ATOM    514  N   GLU A  67     -44.726   4.294  -1.398  1.00 22.50           N
ANISOU  514  N   GLU A  67     4273   2434   1842   -732   -127   -241       N
ATOM    515  CA  GLU A  67     -44.621   3.219  -2.358  1.00 22.21           C
ANISOU  515  CA  GLU A  67     4358   2435   1645   -815   -161   -375       C
ATOM    516  C   GLU A  67     -44.526   3.835  -3.749  1.00 26.95           C
ANISOU  516  C   GLU A  67     5044   3162   2034   -847   -146   -317       C
ATOM    517  O   GLU A  67     -45.320   4.706  -4.093  1.00 26.27           O
ANISOU  517  O   GLU A  67     4922   3162   1899   -850   -220   -148       O
ATOM    518  CB  GLU A  67     -45.836   2.317  -2.237  1.00 22.63           C
ANISOU  518  CB  GLU A  67     4393   2504   1702   -895   -325   -385       C
ATOM    519  CG  GLU A  67     -45.886   1.205  -3.263  1.00 29.83           C
ANISOU  519  CG  GLU A  67     5341   3464   2531   -942   -361   -492       C
ATOM    520  CD  GLU A  67     -47.107   0.340  -3.057  1.00 41.56           C
ANISOU  520  CD  GLU A  67     6769   4949   4071  -1014   -508   -492       C
ATOM    521  OE1 GLU A  67     -48.227   0.820  -3.335  1.00 43.97           O
ANISOU  521  OE1 GLU A  67     7057   5346   4301  -1083   -649   -389       O
ATOM    522  OE2 GLU A  67     -46.948  -0.799  -2.578  1.00 40.70           O
ANISOU  522  OE2 GLU A  67     6616   4753   4093   -994   -484   -581       O
ATOM    523  N   ILE A  68     -43.520   3.416  -4.505  1.00 26.24           N
ANISOU  523  N   ILE A  68     5037   3083   1851   -848    -40   -439       N
ATOM    524  CA  ILE A  68     -43.342   3.878  -5.885  1.00 25.36           C
ANISOU  524  CA  ILE A  68     5007   3101   1529   -869     -7   -391       C
ATOM    525  C   ILE A  68     -43.466   2.660  -6.780  1.00 30.24           C
ANISOU  525  C   ILE A  68     5642   3775   2074   -898    -67   -522       C
ATOM    526  O   ILE A  68     -42.742   1.678  -6.596  1.00 29.77           O
ANISOU  526  O   ILE A  68     5551   3643   2119   -861     -6   -668       O
ATOM    527  CB  ILE A  68     -41.956   4.524  -6.085  1.00 27.59           C
ANISOU  527  CB  ILE A  68     5315   3359   1811   -818    200   -404       C
ATOM    528  CG1 ILE A  68     -41.727   5.642  -5.061  1.00 31.36           C
ANISOU  528  CG1 ILE A  68     5704   3746   2466   -759    272   -288       C
ATOM    529  CG2 ILE A  68     -41.805   5.049  -7.525  1.00 28.92           C
ANISOU  529  CG2 ILE A  68     5559   3668   1761   -835    244   -326       C
ATOM    530  CD1 ILE A  68     -40.363   5.593  -4.408  1.00 40.94           C
ANISOU  530  CD1 ILE A  68     6875   4848   3832   -701    440   -410       C
ATOM    531  N   LEU A  69     -44.393   2.709  -7.735  1.00 31.20           N
ANISOU  531  N   LEU A  69     5800   4030   2025   -948   -194   -465       N
ATOM    532  CA  LEU A  69     -44.675   1.564  -8.581  1.00 31.07           C
ANISOU  532  CA  LEU A  69     5803   4072   1932   -977   -272   -599       C
ATOM    533  C   LEU A  69     -43.944   1.693  -9.909  1.00 32.09           C
ANISOU  533  C   LEU A  69     6015   4316   1862   -952   -183   -639       C
ATOM    534  O   LEU A  69     -43.716   2.804 -10.380  1.00 33.55           O
ANISOU  534  O   LEU A  69     6240   4580   1927   -934   -118   -503       O
ATOM    535  CB  LEU A  69     -46.173   1.472  -8.860  1.00 37.33           C
ANISOU  535  CB  LEU A  69     6569   4953   2661  -1043   -478   -534       C
ATOM    536  CG  LEU A  69     -47.113   1.307  -7.669  1.00 44.73           C
ANISOU  536  CG  LEU A  69     7413   5805   3776  -1081   -588   -483       C
ATOM    537  CD1 LEU A  69     -48.517   1.029  -8.188  1.00 49.75           C
ANISOU  537  CD1 LEU A  69     8008   6548   4348  -1150   -789   -451       C
ATOM    538  CD2 LEU A  69     -46.635   0.178  -6.782  1.00 44.40           C
ANISOU  538  CD2 LEU A  69     7330   5607   3934  -1065   -528   -624       C
ATOM    539  N   ASP A  70     -43.586   0.553 -10.499  1.00 39.23           N
ANISOU  539  N   ASP A  70     6940   5229   2737   -943   -178   -816       N
ATOM    540  CA  ASP A  70     -43.035   0.494 -11.848  1.00 48.47           C
ANISOU  540  CA  ASP A  70     8190   6530   3695   -918   -118   -877       C
ATOM    541  C   ASP A  70     -41.849   1.436 -12.064  1.00 42.64           C
ANISOU  541  C   ASP A  70     7483   5810   2907   -868     80   -806       C
ATOM    542  O   ASP A  70     -41.856   2.264 -12.970  1.00 36.51           O
ANISOU  542  O   ASP A  70     6767   5171   1936   -862    112   -693       O
ATOM    543  CB  ASP A  70     -44.128   0.797 -12.854  1.00 37.23           C
ANISOU  543  CB  ASP A  70     6811   5279   2054   -954   -269   -801       C
ATOM    544  CG  ASP A  70     -43.647   0.656 -14.281  1.00 39.95           C
ANISOU  544  CG  ASP A  70     7246   5779   2156   -918   -220   -872       C
ATOM    545  OD1 ASP A  70     -42.767  -0.197 -14.480  1.00 49.84           O
ANISOU  545  OD1 ASP A  70     8514   6989   3434   -883   -130  -1047       O
ATOM    546  OD2 ASP A  70     -44.123   1.435 -15.119  1.00 41.53           O
ANISOU  546  OD2 ASP A  70     7490   6137   2155   -912   -269   -740       O
ATOM    547  N   CYS A  71     -40.824   1.256 -11.242  1.00 34.12           N
ANISOU  547  N   CYS A  71     6352   4597   2016   -827    212   -871       N
ATOM    548  CA  CYS A  71     -39.679   2.160 -11.179  1.00 39.17           C
ANISOU  548  CA  CYS A  71     6989   5219   2673   -789    405   -809       C
ATOM    549  C   CYS A  71     -38.834   2.243 -12.437  1.00 41.67           C
ANISOU  549  C   CYS A  71     7369   5660   2804   -760    531   -845       C
ATOM    550  O   CYS A  71     -38.378   1.229 -12.954  1.00 38.53           O
ANISOU  550  O   CYS A  71     6981   5284   2372   -729    543  -1011       O
ATOM    551  CB  CYS A  71     -38.777   1.764 -10.015  1.00 31.06           C
ANISOU  551  CB  CYS A  71     5868   4029   1906   -741    492   -896       C
ATOM    552  SG  CYS A  71     -39.480   2.157  -8.399  1.00 33.46           S
ANISOU  552  SG  CYS A  71     6094   4194   2425   -753    412   -804       S
ATOM    553  N   HIS A  72     -38.607   3.468 -12.904  1.00 35.97           N
ANISOU  553  N   HIS A  72     6683   5015   1969   -763    632   -680       N
ATOM    554  CA  HIS A  72     -37.722   3.709 -14.038  1.00 38.21           C
ANISOU  554  CA  HIS A  72     7017   5420   2083   -732    783   -681       C
ATOM    555  C   HIS A  72     -36.565   4.598 -13.604  1.00 37.41           C
ANISOU  555  C   HIS A  72     6863   5241   2110   -715    995   -610       C
ATOM    556  O   HIS A  72     -36.491   5.006 -12.436  1.00 35.86           O
ANISOU  556  O   HIS A  72     6599   4901   2125   -722   1011   -573       O
ATOM    557  CB  HIS A  72     -38.484   4.368 -15.189  1.00 44.97           C
ANISOU  557  CB  HIS A  72     7954   6461   2671   -741    721   -523       C
ATOM    558  CG  HIS A  72     -39.643   3.564 -15.692  1.00 44.89           C
ANISOU  558  CG  HIS A  72     7986   6542   2529   -758    506   -596       C
ATOM    559  ND1 HIS A  72     -40.801   4.145 -16.161  1.00 52.12           N
ANISOU  559  ND1 HIS A  72     8932   7574   3299   -773    360   -437       N
ATOM    560  CD2 HIS A  72     -39.821   2.226 -15.805  1.00 42.07           C
ANISOU  560  CD2 HIS A  72     7632   6172   2180   -758    410   -811       C
ATOM    561  CE1 HIS A  72     -41.644   3.202 -16.537  1.00 58.96           C
ANISOU  561  CE1 HIS A  72     9817   8500   4084   -790    182   -562       C
ATOM    562  NE2 HIS A  72     -41.072   2.029 -16.336  1.00 50.06           N
ANISOU  562  NE2 HIS A  72     8679   7292   3051   -785    213   -790       N
ATOM    563  N   THR A  73     -35.664   4.899 -14.536  1.00 42.93           N
ANISOU  563  N   THR A  73     7589   6039   2685   -691   1158   -595       N
ATOM    564  CA  THR A  73     -34.492   5.706 -14.217  1.00 45.63           C
ANISOU  564  CA  THR A  73     7865   6312   3160   -682   1371   -538       C
ATOM    565  C   THR A  73     -34.881   7.062 -13.634  1.00 46.83           C
ANISOU  565  C   THR A  73     7992   6396   3404   -713   1389   -315       C
ATOM    566  O   THR A  73     -34.227   7.563 -12.713  1.00 45.99           O
ANISOU  566  O   THR A  73     7802   6151   3522   -714   1495   -308       O
ATOM    567  CB  THR A  73     -33.594   5.904 -15.445  1.00 50.80           C
ANISOU  567  CB  THR A  73     8553   7110   3641   -659   1543   -522       C
ATOM    568  OG1 THR A  73     -33.189   4.624 -15.946  1.00 55.80           O
ANISOU  568  OG1 THR A  73     9203   7797   4201   -616   1529   -741       O
ATOM    569  CG2 THR A  73     -32.361   6.714 -15.077  1.00 53.85           C
ANISOU  569  CG2 THR A  73     8848   7414   4199   -660   1763   -469       C
ATOM    570  N   ASP A  74     -35.959   7.637 -14.156  1.00 43.51           N
ANISOU  570  N   ASP A  74     7634   6072   2825   -728   1275   -137       N
ATOM    571  CA  ASP A  74     -36.435   8.949 -13.715  1.00 46.23           C
ANISOU  571  CA  ASP A  74     7950   6358   3256   -740   1272    101       C
ATOM    572  C   ASP A  74     -36.868   8.971 -12.251  1.00 41.76           C
ANISOU  572  C   ASP A  74     7323   5622   2924   -751   1188     73       C
ATOM    573  O   ASP A  74     -37.012  10.036 -11.655  1.00 39.13           O
ANISOU  573  O   ASP A  74     6940   5197   2730   -750   1217    236       O
ATOM    574  CB  ASP A  74     -37.600   9.413 -14.592  1.00 49.92           C
ANISOU  574  CB  ASP A  74     8481   6975   3510   -733   1129    292       C
ATOM    575  N   ASP A  75     -37.086   7.792 -11.683  1.00 34.95           N
ANISOU  575  N   ASP A  75     6455   4713   2111   -754   1083   -127       N
ATOM    576  CA  ASP A  75     -37.555   7.673 -10.305  1.00 31.19           C
ANISOU  576  CA  ASP A  75     5924   4095   1831   -757    994   -162       C
ATOM    577  C   ASP A  75     -36.415   7.660  -9.302  1.00 37.08           C
ANISOU  577  C   ASP A  75     6583   4693   2815   -731   1141   -278       C
ATOM    578  O   ASP A  75     -36.641   7.730  -8.094  1.00 32.18           O
ANISOU  578  O   ASP A  75     5907   3953   2367   -718   1101   -299       O
ATOM    579  CB  ASP A  75     -38.399   6.412 -10.163  1.00 36.18           C
ANISOU  579  CB  ASP A  75     6575   4745   2427   -770    800   -302       C
ATOM    580  CG  ASP A  75     -39.698   6.508 -10.920  1.00 42.69           C
ANISOU  580  CG  ASP A  75     7456   5703   3062   -797    623   -185       C
ATOM    581  OD1 ASP A  75     -40.388   7.540 -10.771  1.00 38.81           O
ANISOU  581  OD1 ASP A  75     6954   5221   2571   -797    573     21       O
ATOM    582  OD2 ASP A  75     -40.021   5.565 -11.674  1.00 40.62           O
ANISOU  582  OD2 ASP A  75     7234   5534   2665   -807    531   -297       O
ATOM    583  N   SER A  76     -35.191   7.561  -9.804  1.00 35.78           N
ANISOU  583  N   SER A  76     6391   4545   2657   -715   1306   -357       N
ATOM    584  CA  SER A  76     -34.014   7.582  -8.946  1.00 38.60           C
ANISOU  584  CA  SER A  76     6636   4777   3252   -683   1439   -467       C
ATOM    585  C   SER A  76     -33.875   8.953  -8.306  1.00 36.54           C
ANISOU  585  C   SER A  76     6321   4422   3142   -693   1542   -318       C
ATOM    586  O   SER A  76     -34.407   9.941  -8.809  1.00 38.72           O
ANISOU  586  O   SER A  76     6638   4739   3334   -719   1548   -108       O
ATOM    587  CB  SER A  76     -32.753   7.271  -9.758  1.00 47.50           C
ANISOU  587  CB  SER A  76     7738   5964   4346   -666   1591   -558       C
ATOM    588  OG  SER A  76     -32.855   6.023 -10.419  1.00 43.72           O
ANISOU  588  OG  SER A  76     7307   5571   3733   -646   1505   -691       O
ATOM    589  N   GLY A  77     -33.153   9.013  -7.194  1.00 33.99           N
ANISOU  589  N   GLY A  77     5881   3968   3065   -661   1606   -420       N
ATOM    590  CA  GLY A  77     -32.857  10.289  -6.578  1.00 36.49           C
ANISOU  590  CA  GLY A  77     6116   4181   3567   -668   1720   -307       C
ATOM    591  C   GLY A  77     -33.163  10.284  -5.101  1.00 33.98           C
ANISOU  591  C   GLY A  77     5691   3738   3483   -615   1604   -369       C
ATOM    592  O   GLY A  77     -33.255   9.222  -4.475  1.00 36.30           O
ANISOU  592  O   GLY A  77     5978   4014   3799   -575   1506   -532       O
ATOM    593  N   THR A  78     -33.341  11.478  -4.546  1.00 30.11           N
ANISOU  593  N   THR A  78     5111   3156   3175   -607   1599   -232       N
ATOM    594  CA  THR A  78     -33.553  11.642  -3.115  1.00 28.15           C
ANISOU  594  CA  THR A  78     4740   2791   3163   -545   1491   -288       C
ATOM    595  C   THR A  78     -35.031  11.723  -2.780  1.00 32.62           C
ANISOU  595  C   THR A  78     5340   3370   3685   -526   1294   -169       C
ATOM    596  O   THR A  78     -35.758  12.539  -3.350  1.00 29.41           O
ANISOU  596  O   THR A  78     4977   2988   3208   -550   1268     30       O
ATOM    597  CB  THR A  78     -32.855  12.923  -2.610  1.00 30.24           C
ANISOU  597  CB  THR A  78     4874   2936   3680   -542   1599   -239       C
ATOM    598  OG1 THR A  78     -31.456  12.859  -2.927  1.00 36.51           O
ANISOU  598  OG1 THR A  78     5614   3724   4533   -568   1789   -350       O
ATOM    599  CG2 THR A  78     -33.042  13.089  -1.108  1.00 30.09           C
ANISOU  599  CG2 THR A  78     4733   2811   3888   -469   1483   -320       C
ATOM    600  N   TYR A  79     -35.471  10.878  -1.846  1.00 26.11           N
ANISOU  600  N   TYR A  79     4488   2527   2906   -477   1159   -283       N
ATOM    601  CA  TYR A  79     -36.836  10.936  -1.344  1.00 22.03           C
ANISOU  601  CA  TYR A  79     3970   2016   2384   -454    982   -185       C
ATOM    602  C   TYR A  79     -36.774  11.397   0.086  1.00 20.81           C
ANISOU  602  C   TYR A  79     3684   1753   2470   -380    945   -229       C
ATOM    603  O   TYR A  79     -35.959  10.895   0.858  1.00 27.76           O
ANISOU  603  O   TYR A  79     4503   2586   3460   -337    976   -395       O
ATOM    604  CB  TYR A  79     -37.528   9.574  -1.451  1.00 23.21           C
ANISOU  604  CB  TYR A  79     4199   2238   2382   -469    856   -264       C
ATOM    605  CG  TYR A  79     -37.871   9.249  -2.888  1.00 25.44           C
ANISOU  605  CG  TYR A  79     4617   2643   2405   -542    854   -206       C
ATOM    606  CD1 TYR A  79     -39.106   9.600  -3.424  1.00 22.32           C
ANISOU  606  CD1 TYR A  79     4269   2324   1887   -571    733    -37       C
ATOM    607  CD2 TYR A  79     -36.947   8.629  -3.708  1.00 25.18           C
ANISOU  607  CD2 TYR A  79     4661   2658   2249   -574    972   -324       C
ATOM    608  CE1 TYR A  79     -39.414   9.330  -4.754  1.00 26.50           C
ANISOU  608  CE1 TYR A  79     4926   2983   2160   -632    717     11       C
ATOM    609  CE2 TYR A  79     -37.247   8.353  -5.044  1.00 28.04           C
ANISOU  609  CE2 TYR A  79     5156   3147   2350   -634    972   -282       C
ATOM    610  CZ  TYR A  79     -38.484   8.703  -5.546  1.00 29.25           C
ANISOU  610  CZ  TYR A  79     5360   3381   2372   -664    837   -115       C
ATOM    611  OH  TYR A  79     -38.799   8.436  -6.861  1.00 32.47           O
ANISOU  611  OH  TYR A  79     5902   3932   2504   -718    819    -79       O
ATOM    612  N   ARG A  80     -37.626  12.362   0.421  1.00 19.98           N
ANISOU  612  N   ARG A  80     3535   1615   2440   -356    878    -82       N
ATOM    613  CA  ARG A  80     -37.624  12.938   1.761  1.00 21.74           C
ANISOU  613  CA  ARG A  80     3637   1740   2882   -279    846   -123       C
ATOM    614  C   ARG A  80     -39.027  12.951   2.357  1.00 23.81           C
ANISOU  614  C   ARG A  80     3882   2025   3140   -236    692    -35       C
ATOM    615  O   ARG A  80     -39.995  13.301   1.675  1.00 22.03           O
ANISOU  615  O   ARG A  80     3702   1852   2818   -262    632    129       O
ATOM    616  CB  ARG A  80     -37.071  14.371   1.699  1.00 21.19           C
ANISOU  616  CB  ARG A  80     3504   1573   2976   -281    953    -49       C
ATOM    617  CG  ARG A  80     -37.175  15.133   3.021  1.00 20.77           C
ANISOU  617  CG  ARG A  80     3295   1478   3117   -190    879    -88       C
ATOM    618  CD  ARG A  80     -36.718  16.579   2.881  1.00 23.26           C
ANISOU  618  CD  ARG A  80     3536   1722   3580   -195    954    -15       C
ATOM    619  NE  ARG A  80     -35.302  16.708   2.552  1.00 27.47           N
ANISOU  619  NE  ARG A  80     4029   2229   4179   -240   1098   -102       N
ATOM    620  CZ  ARG A  80     -34.338  16.853   3.456  1.00 28.12           C
ANISOU  620  CZ  ARG A  80     3959   2345   4379   -202   1085   -243       C
ATOM    621  NH1 ARG A  80     -34.635  16.853   4.752  1.00 26.99           N
ANISOU  621  NH1 ARG A  80     3712   2277   4264   -126    925   -300       N
ATOM    622  NH2 ARG A  80     -33.075  16.988   3.067  1.00 34.65           N
ANISOU  622  NH2 ARG A  80     4743   3143   5279   -252   1229   -309       N
ATOM    623  N   ALA A  81     -39.131  12.583   3.637  1.00 17.85           N
ANISOU  623  N   ALA A  81     3054   1239   2488   -164    630   -140       N
ATOM    624  CA  ALA A  81     -40.365  12.744   4.393  1.00 19.51           C
ANISOU  624  CA  ALA A  81     3220   1464   2731   -110    512    -64       C
ATOM    625  C   ALA A  81     -40.164  13.893   5.360  1.00 19.64           C
ANISOU  625  C   ALA A  81     3076   1474   2911    -28    492    -73       C
ATOM    626  O   ALA A  81     -39.098  14.005   5.963  1.00 20.63           O
ANISOU  626  O   ALA A  81     3102   1644   3092      1    499   -183       O
ATOM    627  CB  ALA A  81     -40.704  11.472   5.166  1.00 17.74           C
ANISOU  627  CB  ALA A  81     2973   1313   2455    -82    417   -154       C
ATOM    628  N   VAL A  82     -41.177  14.737   5.502  1.00 15.57           N
ANISOU  628  N   VAL A  82     2542    925   2451      6    449     51       N
ATOM    629  CA  VAL A  82     -41.155  15.794   6.512  1.00 16.96           C
ANISOU  629  CA  VAL A  82     2587   1106   2749     81    409     21       C
ATOM    630  C   VAL A  82     -42.377  15.631   7.404  1.00 20.08           C
ANISOU  630  C   VAL A  82     2944   1543   3141    148    309     48       C
ATOM    631  O   VAL A  82     -43.502  15.587   6.904  1.00 20.08           O
ANISOU  631  O   VAL A  82     2991   1523   3116    143    281    189       O
ATOM    632  CB  VAL A  82     -41.184  17.170   5.858  1.00 21.05           C
ANISOU  632  CB  VAL A  82     3104   1542   3353     70    463    139       C
ATOM    633  CG1 VAL A  82     -41.174  18.275   6.920  1.00 23.10           C
ANISOU  633  CG1 VAL A  82     3252   1802   3725    139    425     86       C
ATOM    634  CG2 VAL A  82     -39.998  17.311   4.906  1.00 24.27           C
ANISOU  634  CG2 VAL A  82     3556   1903   3762     -5    588    131       C
ATOM    635  N   CYS A  83     -42.162  15.580   8.723  1.00 17.85           N
ANISOU  635  N   CYS A  83     2583   1337   2861    209    254    -65       N
ATOM    636  CA  CYS A  83     -43.226  15.315   9.689  1.00 19.80           C
ANISOU  636  CA  CYS A  83     2800   1637   3085    274    184    -55       C
ATOM    637  C   CYS A  83     -43.369  16.516  10.594  1.00 17.21           C
ANISOU  637  C   CYS A  83     2407   1326   2807    339    171    -77       C
ATOM    638  O   CYS A  83     -42.393  16.918  11.231  1.00 19.48           O
ANISOU  638  O   CYS A  83     2669   1644   3086    348    177   -165       O
ATOM    639  CB  CYS A  83     -42.848  14.136  10.578  1.00 20.02           C
ANISOU  639  CB  CYS A  83     2829   1756   3022    291    139   -153       C
ATOM    640  SG  CYS A  83     -42.478  12.649   9.626  1.00 21.64           S
ANISOU  640  SG  CYS A  83     3105   1949   3170    210    154   -169       S
ATOM    641  N   THR A  84     -44.564  17.091  10.653  1.00 15.85           N
ANISOU  641  N   THR A  84     2207   1136   2680    383    153     12       N
ATOM    642  CA  THR A  84     -44.755  18.351  11.373  1.00 18.13           C
ANISOU  642  CA  THR A  84     2442   1422   3023    441    151     -9       C
ATOM    643  C   THR A  84     -45.954  18.296  12.310  1.00 24.39           C
ANISOU  643  C   THR A  84     3195   2281   3790    518    111      4       C
ATOM    644  O   THR A  84     -46.995  17.739  11.986  1.00 23.09           O
ANISOU  644  O   THR A  84     3018   2129   3625    525     88     97       O
ATOM    645  CB  THR A  84     -44.973  19.516  10.378  1.00 21.50           C
ANISOU  645  CB  THR A  84     2866   1746   3558    426    182     99       C
ATOM    646  OG1 THR A  84     -43.865  19.583   9.467  1.00 23.92           O
ANISOU  646  OG1 THR A  84     3211   1990   3889    352    239     99       O
ATOM    647  CG2 THR A  84     -45.094  20.853  11.109  1.00 29.89           C
ANISOU  647  CG2 THR A  84     3878   2786   4693    483    182     63       C
ATOM    648  N   ASN A  85     -45.797  18.878  13.488  1.00 20.37           N
ANISOU  648  N   ASN A  85     2667   1818   3255    576    108    -79       N
ATOM    649  CA  ASN A  85     -46.949  19.248  14.297  1.00 21.07           C
ANISOU  649  CA  ASN A  85     2710   1950   3346    659     90    -62       C
ATOM    650  C   ASN A  85     -46.662  20.600  14.951  1.00 21.43           C
ANISOU  650  C   ASN A  85     2716   1949   3478    696    119   -117       C
ATOM    651  O   ASN A  85     -45.627  21.216  14.680  1.00 20.96           O
ANISOU  651  O   ASN A  85     2657   1819   3487    649    146   -157       O
ATOM    652  CB  ASN A  85     -47.356  18.140  15.295  1.00 22.56           C
ANISOU  652  CB  ASN A  85     2893   2241   3439    698     78    -92       C
ATOM    653  CG  ASN A  85     -46.365  17.957  16.439  1.00 21.84           C
ANISOU  653  CG  ASN A  85     2808   2180   3309    708    119   -182       C
ATOM    654  OD1 ASN A  85     -45.458  18.765  16.630  1.00 21.79           O
ANISOU  654  OD1 ASN A  85     2787   2126   3367    686    140   -243       O
ATOM    655  ND2 ASN A  85     -46.552  16.887  17.220  1.00 21.91           N
ANISOU  655  ND2 ASN A  85     2826   2268   3230    723    130   -180       N
ATOM    656  N   TYR A  86     -47.571  21.087  15.785  1.00 22.19           N
ANISOU  656  N   TYR A  86     2774   2077   3582    781    115   -121       N
ATOM    657  CA  TYR A  86     -47.395  22.431  16.324  1.00 26.84           C
ANISOU  657  CA  TYR A  86     3331   2603   4266    821    138   -172       C
ATOM    658  C   TYR A  86     -46.158  22.562  17.214  1.00 25.04           C
ANISOU  658  C   TYR A  86     3096   2367   4050    795    161   -290       C
ATOM    659  O   TYR A  86     -45.665  23.664  17.439  1.00 25.99           O
ANISOU  659  O   TYR A  86     3188   2410   4277    793    173   -350       O
ATOM    660  CB  TYR A  86     -48.660  22.904  17.040  1.00 28.68           C
ANISOU  660  CB  TYR A  86     3525   2875   4497    929    131   -157       C
ATOM    661  CG  TYR A  86     -48.834  22.386  18.452  1.00 23.60           C
ANISOU  661  CG  TYR A  86     2874   2331   3763    997    155   -215       C
ATOM    662  CD1 TYR A  86     -48.397  23.135  19.536  1.00 30.29           C
ANISOU  662  CD1 TYR A  86     3706   3154   4650   1036    192   -304       C
ATOM    663  CD2 TYR A  86     -49.474  21.176  18.702  1.00 24.58           C
ANISOU  663  CD2 TYR A  86     2999   2566   3775   1016    143   -176       C
ATOM    664  CE1 TYR A  86     -48.567  22.689  20.834  1.00 28.30           C
ANISOU  664  CE1 TYR A  86     3443   2977   4333   1089    236   -336       C
ATOM    665  CE2 TYR A  86     -49.664  20.720  20.013  1.00 26.69           C
ANISOU  665  CE2 TYR A  86     3254   2918   3967   1050    197   -188       C
ATOM    666  CZ  TYR A  86     -49.204  21.486  21.068  1.00 27.40           C
ANISOU  666  CZ  TYR A  86     3327   2964   4119   1088    258   -259       C
ATOM    667  OH  TYR A  86     -49.372  21.055  22.372  1.00 27.34           O
ANISOU  667  OH  TYR A  86     3277   2996   4116   1097    321   -280       O
ATOM    668  N   LYS A  87     -45.656  21.428  17.698  1.00 22.33           N
ANISOU  668  N   LYS A  87     2772   2099   3612    772    161   -324       N
ATOM    669  CA  LYS A  87     -44.484  21.395  18.565  1.00 23.13           C
ANISOU  669  CA  LYS A  87     2853   2209   3725    743    162   -433       C
ATOM    670  C   LYS A  87     -43.144  21.420  17.838  1.00 24.92           C
ANISOU  670  C   LYS A  87     3071   2386   4010    649    159   -472       C
ATOM    671  O   LYS A  87     -42.131  21.793  18.434  1.00 26.41           O
ANISOU  671  O   LYS A  87     3215   2563   4258    625    147   -574       O
ATOM    672  CB  LYS A  87     -44.526  20.157  19.463  1.00 26.41           C
ANISOU  672  CB  LYS A  87     3285   2723   4027    761    165   -442       C
ATOM    673  CG  LYS A  87     -45.471  20.273  20.624  1.00 28.55           C
ANISOU  673  CG  LYS A  87     3537   3043   4268    850    189   -441       C
ATOM    674  CD  LYS A  87     -44.946  21.324  21.596  1.00 34.66           C
ANISOU  674  CD  LYS A  87     4267   3790   5112    876    169   -566       C
ATOM    675  CE  LYS A  87     -45.540  21.177  22.965  1.00 41.76           C
ANISOU  675  CE  LYS A  87     5145   4756   5965    951    184   -601       C
ATOM    676  NZ  LYS A  87     -44.894  22.150  23.883  1.00 36.08           N
ANISOU  676  NZ  LYS A  87     4389   4020   5302    978    142   -748       N
ATOM    677  N   GLY A  88     -43.120  20.989  16.574  1.00 21.12           N
ANISOU  677  N   GLY A  88     2757   1978   3290    476    -91   -594       N
ATOM    678  CA  GLY A  88     -41.876  20.959  15.829  1.00 20.66           C
ANISOU  678  CA  GLY A  88     2618   1838   3392    409    -22   -699       C
ATOM    679  C   GLY A  88     -41.931  20.128  14.570  1.00 20.04           C
ANISOU  679  C   GLY A  88     2695   1704   3216    365     23   -440       C
ATOM    680  O   GLY A  88     -43.007  19.810  14.077  1.00 22.52           O
ANISOU  680  O   GLY A  88     3151   2015   3390    378     14   -198       O
ATOM    681  N   GLU A  89     -40.761  19.776  14.064  1.00 21.00           N
ANISOU  681  N   GLU A  89     2751   1797   3431    321     65   -553       N
ATOM    682  CA  GLU A  89     -40.694  19.019  12.824  1.00 18.49           C
ANISOU  682  CA  GLU A  89     2568   1433   3025    279    123   -346       C
ATOM    683  C   GLU A  89     -39.503  18.079  12.829  1.00 22.04           C
ANISOU  683  C   GLU A  89     2925   1965   3484    291     45   -513       C
ATOM    684  O   GLU A  89     -38.509  18.317  13.512  1.00 24.01           O
ANISOU  684  O   GLU A  89     2972   2260   3892    318     -2   -840       O
ATOM    685  CB  GLU A  89     -40.618  19.974  11.631  1.00 24.50           C
ANISOU  685  CB  GLU A  89     3417   1956   3936    193    401   -234       C
ATOM    686  CG  GLU A  89     -39.308  20.710  11.483  1.00 47.62           C
ANISOU  686  CG  GLU A  89     6192   4701   7199     72    651   -495       C
ATOM    687  CD  GLU A  89     -39.183  21.408  10.133  1.00 72.84           C
ANISOU  687  CD  GLU A  89     9588   7608  10481     11   1024   -304       C
ATOM    688  OE1 GLU A  89     -40.157  21.383   9.348  1.00 75.78           O
ANISOU  688  OE1 GLU A  89    10225   7970  10598    125   1016     27       O
ATOM    689  OE2 GLU A  89     -38.104  21.972   9.855  1.00 83.64           O
ANISOU  689  OE2 GLU A  89    10822   8868  12089   -123   1291   -482       O
ATOM    690  N   ALA A  90     -39.616  17.000  12.059  1.00 18.71           N
ANISOU  690  N   ALA A  90     2624   1575   2909    293     15   -336       N
ATOM    691  CA  ALA A  90     -38.498  16.092  11.867  1.00 17.60           C
ANISOU  691  CA  ALA A  90     2407   1484   2796    305    -38   -477       C
ATOM    692  C   ALA A  90     -38.504  15.723  10.405  1.00 19.86           C
ANISOU  692  C   ALA A  90     2806   1685   3057    208    108   -306       C
ATOM    693  O   ALA A  90     -39.559  15.707   9.778  1.00 22.67           O
ANISOU  693  O   ALA A  90     3316   2031   3266    213    132    -72       O
ATOM    694  CB  ALA A  90     -38.687  14.843  12.696  1.00 20.71           C
ANISOU  694  CB  ALA A  90     2869   2030   2972    469   -253   -440       C
ATOM    695  N   SER A  91     -37.335  15.402   9.871  1.00 18.84           N
ANISOU  695  N   SER A  91     2582   1517   3061    148    189   -466       N
ATOM    696  CA  SER A  91     -37.267  15.027   8.459  1.00 18.10           C
ANISOU  696  CA  SER A  91     2613   1356   2909     73    346   -321       C
ATOM    697  C   SER A  91     -36.244  13.932   8.268  1.00 20.61           C
ANISOU  697  C   SER A  91     2819   1730   3281     66    285   -487       C
ATOM    698  O   SER A  91     -35.301  13.791   9.056  1.00 24.33           O
ANISOU  698  O   SER A  91     3089   2248   3909    110    181   -773       O
ATOM    699  CB  SER A  91     -36.912  16.239   7.596  1.00 20.60           C
ANISOU  699  CB  SER A  91     2996   1452   3379    -34    699   -306       C
ATOM    700  OG  SER A  91     -37.023  15.911   6.212  1.00 24.81           O
ANISOU  700  OG  SER A  91     3733   1946   3747    -36    849   -117       O
ATOM    701  N   ASP A  92     -36.440  13.133   7.221  1.00 17.86           N
ANISOU  701  N   ASP A  92     2588   1401   2798     44    320   -347       N
ATOM    702  CA  ASP A  92     -35.523  12.043   6.911  1.00 21.91           C
ANISOU  702  CA  ASP A  92     3003   1952   3369     33    280   -494       C
ATOM    703  C   ASP A  92     -35.453  11.963   5.399  1.00 20.43           C
ANISOU  703  C   ASP A  92     2938   1709   3114    -57    499   -399       C
ATOM    704  O   ASP A  92     -36.402  12.338   4.717  1.00 21.46           O
ANISOU  704  O   ASP A  92     3263   1843   3047    -24    561   -180       O
ATOM    705  CB  ASP A  92     -36.064  10.728   7.476  1.00 21.05           C
ANISOU  705  CB  ASP A  92     2931   1956   3112    156     40   -414       C
ATOM    706  CG  ASP A  92     -35.098   9.566   7.317  1.00 26.98           C
ANISOU  706  CG  ASP A  92     3586   2727   3939    190    -22   -570       C
ATOM    707  OD1 ASP A  92     -33.866   9.764   7.358  1.00 29.43           O
ANISOU  707  OD1 ASP A  92     3719   3016   4445    174      6   -837       O
ATOM    708  OD2 ASP A  92     -35.590   8.435   7.158  1.00 34.93           O
ANISOU  708  OD2 ASP A  92     4672   3755   4846    232    -85   -463       O
ATOM    709  N   TYR A  93     -34.323  11.506   4.873  1.00 19.91           N
ANISOU  709  N   TYR A  93     2764   1606   3195   -134    611   -590       N
ATOM    710  CA  TYR A  93     -34.207  11.346   3.429  1.00 22.34           C
ANISOU  710  CA  TYR A  93     3216   1876   3396   -196    838   -509       C
ATOM    711  C   TYR A  93     -33.328  10.154   3.104  1.00 27.01           C
ANISOU  711  C   TYR A  93     3660   2517   4087   -234    793   -706       C
ATOM    712  O   TYR A  93     -32.516   9.730   3.921  1.00 28.26           O
ANISOU  712  O   TYR A  93     3592   2688   4456   -215    654   -947       O
ATOM    713  CB  TYR A  93     -33.654  12.614   2.782  1.00 25.56           C
ANISOU  713  CB  TYR A  93     3722   2069   3921   -301   1259   -517       C
ATOM    714  CG  TYR A  93     -32.234  12.946   3.180  1.00 28.44           C
ANISOU  714  CG  TYR A  93     3807   2291   4709   -451   1449   -890       C
ATOM    715  CD1 TYR A  93     -31.154  12.430   2.478  1.00 37.82           C
ANISOU  715  CD1 TYR A  93     4883   3423   6062   -564   1646  -1112       C
ATOM    716  CD2 TYR A  93     -31.977  13.777   4.260  1.00 29.60           C
ANISOU  716  CD2 TYR A  93     3758   2371   5116   -475   1429  -1087       C
ATOM    717  CE1 TYR A  93     -29.853  12.733   2.840  1.00 48.00           C
ANISOU  717  CE1 TYR A  93     5808   4715   7713   -680   1751  -1444       C
ATOM    718  CE2 TYR A  93     -30.675  14.089   4.629  1.00 40.00           C
ANISOU  718  CE2 TYR A  93     4705   3728   6764   -574   1510  -1424       C
ATOM    719  CZ  TYR A  93     -29.620  13.561   3.918  1.00 47.07           C
ANISOU  719  CZ  TYR A  93     5449   4638   7797   -674   1667  -1594       C
ATOM    720  OH  TYR A  93     -28.326  13.863   4.280  1.00 54.82           O
ANISOU  720  OH  TYR A  93     6009   5682   9137   -769   1745  -1947       O
ATOM    721  N   ALA A  94     -33.500   9.622   1.899  1.00 22.86           N
ANISOU  721  N   ALA A  94     3265   2033   3386   -246    891   -625       N
ATOM    722  CA  ALA A  94     -32.724   8.486   1.436  1.00 24.52           C
ANISOU  722  CA  ALA A  94     3345   2282   3689   -290    878   -812       C
ATOM    723  C   ALA A  94     -32.718   8.507  -0.082  1.00 28.20           C
ANISOU  723  C   ALA A  94     4000   2755   3960   -324   1137   -745       C
ATOM    724  O   ALA A  94     -33.502   9.218  -0.709  1.00 27.94           O
ANISOU  724  O   ALA A  94     4228   2735   3652   -242   1245   -524       O
ATOM    725  CB  ALA A  94     -33.327   7.172   1.955  1.00 26.89           C
ANISOU  725  CB  ALA A  94     3583   2702   3933   -190    559   -789       C
ATOM    726  N  ATHR A  95     -31.833   7.711  -0.667  0.67 26.97           N
ANISOU  726  N  ATHR A  95     3729   2601   3919   -401   1227   -947       N
ATOM    727  CA ATHR A  95     -31.692   7.685  -2.114  0.67 27.87           C
ANISOU  727  CA ATHR A  95     4033   2729   3827   -418   1503   -917       C
ATOM    728  C  ATHR A  95     -32.259   6.413  -2.717  0.67 33.13           C
ANISOU  728  C  ATHR A  95     4684   3598   4306   -339   1284   -948       C
ATOM    729  O  ATHR A  95     -32.148   5.332  -2.142  0.67 32.65           O
ANISOU  729  O  ATHR A  95     4398   3576   4432   -354   1047  -1089       O
ATOM    730  CB ATHR A  95     -30.220   7.805  -2.534  0.67 33.34           C
ANISOU  730  CB ATHR A  95     4604   3254   4808   -596   1867  -1177       C
ATOM    731  OG1ATHR A  95     -29.483   6.687  -2.024  0.67 40.67           O
ANISOU  731  OG1ATHR A  95     5198   4228   6026   -641   1646  -1468       O
ATOM    732  CG2ATHR A  95     -29.618   9.095  -2.012  0.67 30.60           C
ANISOU  732  CG2ATHR A  95     4220   2672   4734   -709   2159  -1239       C
ATOM    733  N  BTHR A  95     -31.820   7.735  -0.682  0.33 27.66           N
ANISOU  733  N  BTHR A  95     3819   2685   4007   -403   1235   -947       N
ATOM    734  CA BTHR A  95     -31.694   7.737  -2.135  0.33 29.64           C
ANISOU  734  CA BTHR A  95     4268   2949   4046   -418   1516   -911       C
ATOM    735  C  BTHR A  95     -32.154   6.432  -2.773  0.33 32.15           C
ANISOU  735  C  BTHR A  95     4559   3464   4192   -350   1313   -961       C
ATOM    736  O  BTHR A  95     -31.874   5.345  -2.267  0.33 29.66           O
ANISOU  736  O  BTHR A  95     4006   3177   4086   -380   1105  -1129       O
ATOM    737  CB BTHR A  95     -30.250   8.058  -2.582  0.33 33.08           C
ANISOU  737  CB BTHR A  95     4617   3194   4757   -598   1927  -1143       C
ATOM    738  OG1BTHR A  95     -30.054   7.611  -3.932  0.33 32.36           O
ANISOU  738  OG1BTHR A  95     4686   3155   4453   -598   2150  -1154       O
ATOM    739  CG2BTHR A  95     -29.249   7.367  -1.679  0.33 37.14           C
ANISOU  739  CG2BTHR A  95     4730   3687   5695   -681   1749  -1490       C
ATOM    740  N   LEU A  96     -32.875   6.557  -3.883  1.00 30.80           N
ANISOU  740  N   LEU A  96     4642   3426   3636   -220   1376   -834       N
ATOM    741  CA  LEU A  96     -33.266   5.409  -4.688  1.00 31.80           C
ANISOU  741  CA  LEU A  96     4721   3759   3602   -152   1227   -965       C
ATOM    742  C   LEU A  96     -32.363   5.315  -5.908  1.00 35.72           C
ANISOU  742  C   LEU A  96     5329   4248   3996   -193   1556  -1075       C
ATOM    743  O   LEU A  96     -32.146   6.305  -6.608  1.00 35.91           O
ANISOU  743  O   LEU A  96     5666   4192   3787   -134   1898   -922       O
ATOM    744  CB  LEU A  96     -34.713   5.544  -5.152  1.00 30.25           C
ANISOU  744  CB  LEU A  96     4688   3786   3020     82   1019   -854       C
ATOM    745  CG  LEU A  96     -35.248   4.309  -5.882  1.00 33.94           C
ANISOU  745  CG  LEU A  96     5017   4494   3387    156    820  -1096       C
ATOM    746  CD1 LEU A  96     -35.265   3.091  -4.961  1.00 33.06           C
ANISOU  746  CD1 LEU A  96     4560   4313   3688      0    629  -1270       C
ATOM    747  CD2 LEU A  96     -36.627   4.582  -6.464  1.00 34.55           C
ANISOU  747  CD2 LEU A  96     5223   4832   3071    438    608  -1085       C
ATOM    748  N   ASP A  97     -31.835   4.123  -6.160  1.00 31.96           N
ANISOU  748  N   ASP A  97     4624   3825   3696   -286   1498  -1332       N
ATOM    749  CA  ASP A  97     -31.105   3.866  -7.393  1.00 36.40           C
ANISOU  749  CA  ASP A  97     5276   4422   4130   -314   1789  -1474       C
ATOM    750  C   ASP A  97     -31.820   2.784  -8.173  1.00 35.49           C
ANISOU  750  C   ASP A  97     5106   4584   3794   -187   1558  -1637       C
ATOM    751  O   ASP A  97     -31.826   1.620  -7.777  1.00 41.97           O
ANISOU  751  O   ASP A  97     5617   5426   4902   -269   1336  -1846       O
ATOM    752  CB  ASP A  97     -29.663   3.451  -7.102  1.00 41.15           C
ANISOU  752  CB  ASP A  97     5607   4835   5194   -549   1971  -1728       C
ATOM    753  CG  ASP A  97     -28.795   4.621  -6.681  1.00 71.00           C
ANISOU  753  CG  ASP A  97     9424   8351   9202   -683   2315  -1695       C
ATOM    754  OD1 ASP A  97     -28.897   5.698  -7.309  1.00 80.23           O
ANISOU  754  OD1 ASP A  97    10929   9436  10116   -636   2634  -1465       O
ATOM    755  OD2 ASP A  97     -28.016   4.467  -5.717  1.00 79.06           O
ANISOU  755  OD2 ASP A  97    10120   9251  10668   -808   2203  -1863       O
ATOM    756  N   VAL A  98     -32.436   3.178  -9.281  1.00 43.38           N
ANISOU  756  N   VAL A  98     6415   5790   4278     49   1618  -1560       N
ATOM    757  CA  VAL A  98     -33.098   2.222 -10.158  1.00 42.95           C
ANISOU  757  CA  VAL A  98     6285   6050   3984    209   1397  -1807       C
ATOM    758  C   VAL A  98     -32.082   1.657 -11.148  1.00 46.54           C
ANISOU  758  C   VAL A  98     6741   6526   4414    129   1670  -2020       C
ATOM    759  O   VAL A  98     -31.525   2.385 -11.968  1.00 51.02           O
ANISOU  759  O   VAL A  98     7624   7050   4710    218   1991  -1844       O
ATOM    760  CB  VAL A  98     -34.288   2.867 -10.894  1.00 42.97           C
ANISOU  760  CB  VAL A  98     6601   6336   3390    596   1250  -1696       C
ATOM    761  CG1 VAL A  98     -35.085   1.812 -11.644  1.00 42.36           C
ANISOU  761  CG1 VAL A  98     6324   6593   3176    754    927  -2042       C
ATOM    762  CG2 VAL A  98     -35.180   3.597  -9.903  1.00 40.35           C
ANISOU  762  CG2 VAL A  98     6281   5939   3110    657   1043  -1471       C
ATOM    763  N   THR A  99     -31.835   0.355 -11.056  1.00 44.45           N
ANISOU  763  N   THR A  99     6098   6276   4513    -14   1488  -2290       N
ATOM    764  CA  THR A  99     -30.780  -0.286 -11.838  1.00 54.00           C
ANISOU  764  CA  THR A  99     7223   7451   5842   -121   1665  -2436       C
ATOM    765  C   THR A  99     -31.332  -1.010 -13.062  1.00 61.13           C
ANISOU  765  C   THR A  99     8149   8654   6425     81   1520  -2625       C
ATOM    766  O   THR A  99     -32.421  -1.579 -13.016  1.00 60.13           O
ANISOU  766  O   THR A  99     7860   8706   6282    185   1184  -2757       O
ATOM    767  CB  THR A  99     -29.990  -1.284 -10.973  1.00 52.48           C
ANISOU  767  CB  THR A  99     6612   7049   6279   -394   1577  -2593       C
ATOM    768  OG1 THR A  99     -30.854  -2.355 -10.571  1.00 55.37           O
ANISOU  768  OG1 THR A  99     6710   7496   6831   -376   1241  -2730       O
ATOM    769  CG2 THR A  99     -29.447  -0.588  -9.731  1.00 52.98           C
ANISOU  769  CG2 THR A  99     6636   6845   6650   -530   1653  -2447       C
TER
HETATM  770 ZN    ZN B   1     -41.892  -0.004 -16.392  0.38 28.72          Zn
HETATM  771 CL    CL D   1     -34.580  16.990  -0.484  1.00 34.40          Cl
HETATM  772 CL    CL C   1     -42.910   3.857  18.106  0.86 28.25          Cl
HETATM  773 CL    CL E   1     -47.843  10.447  13.523  1.00 26.35          Cl
HETATM  774  O   HOH S   1     -36.729   2.412   3.864  1.00 19.96           O
HETATM  775  O   HOH S   2     -36.305   1.928   6.756  1.00 22.10           O
HETATM  776  O   HOH S   3     -50.293  19.892  15.532  1.00 26.94           O
HETATM  777  O   HOH S   4     -41.275  18.958  21.980  1.00 25.40           O
HETATM  778  O   HOH S   5     -35.941  13.026  14.687  1.00 28.17           O
HETATM  779  O   HOH S   6     -47.893   3.070   6.730  1.00 29.23           O
HETATM  780  O   HOH S   7     -46.816   9.054   4.901  1.00 22.22           O
HETATM  781  O   HOH S   8     -44.839  18.233   7.043  1.00 27.36           O
HETATM  782  O   HOH S   9     -32.703   3.971  12.092  1.00 29.21           O
HETATM  783  O   HOH S  10     -49.338  10.408   5.081  1.00 31.78           O
HETATM  784  O   HOH S  11     -46.642   8.977  15.826  1.00 25.42           O
HETATM  785  O   HOH S  12     -27.424   7.557   1.148  1.00 32.59           O
HETATM  786  O   HOH S  13     -46.712  15.014  -0.010  1.00 29.09           O
HETATM  787  O   HOH S  14     -49.164  22.215  24.832  1.00 37.89           O
HETATM  788  O   HOH S  15     -36.478  15.109  -1.911  1.00 30.81           O
HETATM  789  O   HOH S  16     -32.128   7.808   6.382  1.00 32.25           O
HETATM  790  O   HOH S  17     -45.736   9.805  21.657  1.00 40.27           O
HETATM  791  O   HOH S  18     -47.027   7.016  17.191  1.00 30.47           O
HETATM  792  O   HOH S  19     -39.125  -4.558  -5.454  1.00 38.91           O
HETATM  793  O   HOH S  20     -37.831  -3.012  -3.150  1.00 39.24           O
HETATM  794  O   HOH S  21     -45.025   6.095  16.932  1.00 30.34           O
HETATM  795  O   HOH S  22     -50.480  13.906   6.673  1.00 37.65           O
HETATM  796  O   HOH S  23     -39.727   2.806  17.807  1.00 33.26           O
HETATM  797  O   HOH S  24     -43.652  14.291  25.867  1.00 44.21           O
HETATM  798  O   HOH S  25     -44.191  -3.092 -13.424  1.00 45.33           O
HETATM  799  O   HOH S  26     -48.242   0.320   7.666  1.00 49.27           O
HETATM  800  O   HOH S  27     -35.035   0.000   8.196  1.00 32.38           O
HETATM  801  O   HOH S  28     -43.515  22.978  13.532  1.00 37.99           O
HETATM  802  O   HOH S  29     -43.044  21.402  -4.210  1.00 37.70           O
HETATM  803  O   HOH S  30     -52.661   7.030   5.969  1.00 40.32           O
HETATM  804  O   HOH S  31     -49.892  18.230  26.194  1.00 39.25           O
HETATM  805  O   HOH S  32     -43.684  24.758  15.643  1.00 43.76           O
HETATM  806  O   HOH S  33     -38.934  22.220  -9.254  1.00 40.50           O
HETATM  807  O   HOH S  34     -53.091   6.135  11.959  1.00 43.43           O
HETATM  808  O   HOH S  35     -49.983  11.795   8.612  1.00 42.78           O
HETATM  809  O   HOH S  36     -46.242   8.362  19.229  1.00 42.22           O
HETATM  810  O   HOH S  37     -31.446  15.268  -4.770  1.00 47.67           O
HETATM  811  O   HOH S  38     -38.771  15.684  -8.628  1.00 43.63           O
HETATM  812  O   HOH S  39     -36.923   0.403   2.027  1.00 37.14           O
HETATM  813  O   HOH S  40     -50.455  17.953  13.670  1.00 38.30           O
HETATM  814  O   HOH S  41     -31.656  12.321  -9.354  1.00 50.73           O
HETATM  815  O   HOH S  42     -42.303  21.774  24.727  1.00 48.55           O
HETATM  816  O   HOH S  43     -46.118  14.110  -7.838  1.00 43.33           O
HETATM  817  O   HOH S  44     -38.970  21.675  18.439  1.00 54.69           O
HETATM  818  O   HOH S  45     -45.756   1.799 -17.490  1.00 43.94           O
HETATM  819  O   HOH S  46     -38.007   7.876  21.726  1.00 45.73           O
HETATM  820  O   HOH S  47     -30.572  -3.996  -8.275  1.00 50.39           O
HETATM  821  O   HOH S  48     -46.065  18.945  -6.645  1.00 48.83           O
HETATM  822  O   HOH S  49     -35.197  -1.283   1.187  1.00 40.37           O
HETATM  823  O   HOH S  50     -53.403  13.217  17.654  1.00 38.10           O
HETATM  824  O   HOH S  51     -40.686  22.183  -4.628  1.00 44.68           O
HETATM  825  O   HOH S  52     -32.081  14.150   8.258  1.00 50.03           O
HETATM  826  O   HOH S  53     -38.608   2.299  15.600  1.00 46.70           O
HETATM  827  O   HOH S  54     -41.222  23.623  12.640  1.00 49.10           O
HETATM  828  O   HOH S  55     -51.699  13.437  -2.716  1.00 55.93           O
HETATM  829  O   HOH S  56     -33.212  16.811  -3.629  1.00 47.98           O
HETATM  830  O   HOH S  57     -32.763   2.610  14.503  1.00 47.74           O
HETATM  831  O   HOH S  58     -53.994  17.663  20.810  1.00 46.07           O
HETATM  832  O   HOH S  59     -50.801  21.660  26.675  1.00 50.12           O
HETATM  833  O   HOH S  60     -44.077   4.464 -14.358  1.00 46.06           O
HETATM  834  O   HOH S  61     -49.193  14.988   2.048  1.00 46.31           O
HETATM  835  O   HOH S  62     -33.652  11.641 -11.194  1.00 52.84           O
HETATM  836  O   HOH S  63     -37.986  16.904  16.467  1.00 55.94           O
HETATM  837  O   HOH S  64     -44.368  22.331  -2.032  1.00 53.44           O
HETATM  838  O   HOH S  65     -40.869  22.856  -7.433  1.00 40.26           O
HETATM  839  O   HOH S  66     -41.083  24.600  17.289  1.00 62.29           O
HETATM  840  O   HOH S  67     -36.773  14.623 -10.380  1.00 51.18           O
HETATM  841  O   HOH S  68     -48.172   5.116  18.704  1.00 44.13           O
HETATM  842  O   HOH S  69     -39.144  23.818  13.908  1.00 69.62           O
HETATM  843  O   HOH S  70     -37.651  -7.956 -12.320  1.00 52.27           O
HETATM  844  O   HOH S  71     -49.869  13.057   4.166  1.00 55.02           O
HETATM  845  O   HOH S  72     -29.422  -1.153   0.749  1.00 50.27           O
HETATM  846  O   HOH S  73     -47.771   2.752 -12.383  1.00 68.26           O
HETATM  847  O   HOH S  74     -41.186   8.895  -8.449  1.00 34.44           O
HETATM  848  O   HOH S  75     -42.946  20.050   4.598  1.00 43.71           O
HETATM  849  O   HOH S  76     -35.570  18.613  -8.744  1.00 48.17           O
HETATM  850  O   HOH S  77     -36.247  20.134  12.896  1.00 47.49           O
HETATM  851  O   HOH S  78     -45.458  -2.919  -3.428  1.00 46.69           O
HETATM  852  O   HOH S  79     -42.429  11.287  25.080  1.00 56.20           O
HETATM  853  O   HOH S  80     -47.852   0.266 -12.161  1.00 54.65           O
HETATM  854  O   HOH S  81     -25.940  -2.098   3.703  1.00 52.40           O
HETATM  855  O   HOH S  82     -47.907  20.885   8.383  1.00 43.05           O
HETATM  856  O   HOH S  83     -32.653  16.446   7.200  1.00 53.27           O
HETATM  857  O   HOH S  84     -55.413  16.854  18.759  1.00 53.22           O
HETATM  858  O   HOH S  85     -49.475  10.001  18.749  1.00 43.62           O
HETATM  859  O   HOH S  86     -53.736  14.519  20.029  1.00 50.01           O
HETATM  860  O   HOH S  87     -48.359   0.524  12.438  1.00 47.65           O
HETATM  861  O   HOH S  88     -36.850   7.281 -16.729  1.00 51.49           O
HETATM  862  O   HOH S  89     -42.800  10.989  -9.336  1.00 40.08           O
HETATM  863  O   HOH S  90     -41.420  12.634  -9.137  1.00 44.16           O
HETATM  864  O   HOH S  91     -29.635  -2.214  -1.995  1.00 43.89           O
HETATM  865  O   HOH S  92     -30.372  13.695  -6.480  1.00 56.72           O
HETATM  866  O   HOH S  93     -42.201  16.543  26.016  1.00 51.85           O
HETATM  867  O   HOH S  94     -53.019  16.240  14.545  1.00 52.18           O
HETATM  868  O   HOH S  95     -48.864  20.455  10.940  1.00 46.85           O
HETATM  869  O   HOH S  96     -52.736  15.740  21.875  1.00 43.10           O
HETATM  870  O   HOH S  97     -38.525  20.952  15.675  1.00 40.06           O
HETATM  871  O   HOH S  98     -44.345  15.869  -8.127  1.00 46.21           O
HETATM  872  O   HOH S  99     -53.857  14.697  24.343  1.00 54.32           O
HETATM  873  O   HOH S 100     -43.321   7.696  21.748  1.00 46.87           O
HETATM  874  O   HOH S 101     -20.416  20.955   0.807  1.00 50.95           O
HETATM  875  O   HOH S 102     -21.561  21.783   2.129  1.00 56.43           O
HETATM  876  O   HOH S 103     -49.379   6.369  21.068  1.00 64.57           O
HETATM  877  O   HOH S 104     -25.754  -0.525   6.023  1.00 48.53           O
HETATM  878  O   HOH S 105     -39.277  14.520  22.428  1.00 59.10           O
HETATM  879  O   HOH S 106     -42.268  21.616   8.771  1.00 43.19           O
HETATM  880  O   HOH S 107     -30.916   6.917  13.300  1.00 59.25           O
HETATM  881  O   HOH S 108     -52.380  10.586   9.020  1.00 51.33           O
HETATM  882  O   HOH S 109     -30.927   8.689  13.691  1.00 64.89           O
HETATM  883  O   HOH S 110     -36.876  24.288   9.573  1.00 55.05           O
HETATM  884  O   HOH S 111     -49.514  17.760   4.889  1.00 54.55           O
HETATM  885  O   HOH S 112     -42.764   5.526  23.920  1.00 54.16           O
HETATM  886  O   HOH S 113     -40.138   6.943 -16.843  1.00 51.88           O
HETATM  887  O   HOH S 114     -51.523  11.219  18.353  1.00 56.13           O
HETATM  888  O   HOH S 115     -22.565  15.738   5.728  1.00 49.34           O
HETATM  889  O   HOH S 116     -22.123   7.923   6.302  1.00 54.36           O
HETATM  890  O   HOH S 117     -25.258   4.532   5.612  1.00 56.51           O
HETATM  891  O   HOH S 118     -39.441  -5.705 -13.806  1.00 47.74           O
HETATM  892  O   HOH S 119     -45.762  -2.381 -11.292  1.00 64.39           O
HETATM  893  O   HOH S 120     -23.164   5.557   6.897  1.00 50.46           O
HETATM  894  O   HOH S 121     -49.902  16.682   3.498  1.00 65.04           O
HETATM  895  O   HOH S 122     -30.153   5.452 -11.761  1.00 72.60           O
HETATM  896  O   HOH S 123     -24.091  16.092   8.930  1.00 52.34           O
HETATM  897  O   HOH S 124     -21.805  16.456   7.748  1.00 50.47           O
HETATM  898  O   HOH S 125     -37.740  25.460  10.871  1.00 65.21           O
HETATM  899  O   HOH S 126     -23.137   9.013   5.024  1.00 59.46           O
HETATM  900  O   HOH S 127     -29.305  -1.925   6.883  1.00 53.62           O
HETATM  901  O   HOH S 128     -35.649  17.643  13.748  1.00 68.70           O
HETATM  902  O   HOH S 129     -34.996  14.917  12.342  1.00 32.19           O
HETATM  903  O   HOH S 130     -57.105  13.668  19.010  1.00 46.15           O
HETATM  904  O   HOH S 131     -51.226  -0.481  -6.215  1.00 43.76           O
HETATM  905  O   HOH S 132     -41.557  22.063   5.994  1.00 44.93           O
HETATM  906  O   HOH S 133     -51.647  18.731  11.709  1.00 50.69           O
HETATM  907  O   HOH S 134     -39.341  23.299 -12.022  1.00 54.44           O
HETATM  908  O   HOH S 135     -51.447   1.486   0.075  1.00 53.35           O
HETATM  909  O   HOH S 136     -19.487  12.566   4.923  1.00 50.40           O
HETATM  910  O   HOH S 137     -47.372  19.074   6.525  1.00 49.20           O
HETATM  911  O   HOH S 138     -20.573  19.561   2.447  1.00 61.19           O
HETATM  912  O   HOH S 139     -24.337  15.388   2.606  1.00 52.08           O
HETATM  913  O   HOH S 140     -22.767  23.775   9.251  1.00 48.96           O
HETATM  914  O   HOH S 141     -56.174  12.466  20.871  1.00 52.41           O
HETATM  915  O   HOH S 142     -23.176  17.690   8.743  1.00 63.74           O
HETATM  916  O   HOH S 143     -23.744  13.149   3.624  1.00 50.89           O
HETATM  917  O   HOH S 144     -29.751   7.393   8.143  1.00 49.82           O
HETATM  918  O   HOH S 145     -51.821  -0.069  -1.817  1.00 51.74           O
HETATM  919  O   HOH S 146     -20.459  17.954   3.411  1.00 63.92           O
HETATM  920  O   HOH S 147     -17.904  22.315  -0.221  1.00 64.06           O
HETATM  921  O   HOH S 148     -36.692  12.725 -12.266  1.00 53.34           O
HETATM  922  O   HOH S 149     -30.605  -4.786 -12.246  1.00 49.46           O
HETATM  923  O   HOH S 150     -25.695   2.344  -7.610  1.00 51.78           O
HETATM  924  O   HOH S 151     -43.105   6.070 -16.640  1.00 62.56           O
HETATM  925  O   HOH S 152     -27.897  -4.971 -10.836  1.00 59.67           O
HETATM  926  O   HOH S 153     -51.565  -1.565  -3.706  1.00 52.89           O
HETATM  927  O   HOH S 154     -51.576  10.324  20.815  1.00 48.95           O
HETATM  928  O   HOH S 155     -42.797  18.482  24.602  1.00 52.28           O
HETATM  929  O   HOH S 156     -26.235   1.212  -5.457  1.00 64.43           O
HETATM  930  O   HOH S 157     -24.010  19.651   5.526  1.00 59.10           O
HETATM  931  O   HOH S 158     -31.453  16.884  -7.032  1.00 60.18           O
HETATM  932  O   HOH S 159     -30.136   3.734  11.820  1.00 46.75           O
HETATM  933  O   HOH S 160     -24.601  11.318   7.262  1.00 48.92           O
HETATM  934  O   HOH S 161     -52.587   3.265  -0.560  1.00 50.51           O
HETATM  935  O   HOH S 162     -24.484  24.764   7.953  1.00 50.68           O
HETATM  936  O   HOH S 163     -23.735   6.640   2.147  1.00 55.08           O
HETATM  937  O   HOH S 164     -27.858  14.972   6.656  1.00 46.78           O
HETATM  938  O   HOH S 165     -48.159  -2.954  15.684  1.00 43.72           O
HETATM  939  O   HOH S 166     -39.423  15.306  20.241  1.00 45.87           O
HETATM  940  O   HOH S 167     -24.330  10.176   0.423  1.00 48.42           O
HETATM  941  O   HOH S 168     -21.077  22.217   6.175  1.00 46.99           O
HETATM  942  O   HOH S 169     -22.178   8.381   9.399  1.00 59.43           O
HETATM  943  O   HOH S 170     -55.595  -2.025  -5.274  1.00 62.73           O
HETATM  944  O   HOH S 171     -49.887   8.845  14.207  1.00 53.69           O
HETATM  945  O   HOH S 172     -28.872  -2.381   4.371  1.00 52.19           O
HETATM  946  O   HOH S 173     -55.967  -1.570  -8.134  1.00 62.84           O
HETATM  947  O   HOH S 174     -24.468  12.332   1.895  1.00 52.29           O
HETATM  948  O   HOH S 175     -44.643   5.298  21.517  1.00 59.92           O
HETATM  949  O   HOH S 176     -24.158   3.062   6.193  1.00 56.53           O
HETATM  950  O   HOH S 177     -46.941   4.275 -14.060  1.00 62.24           O
HETATM  951  O   HOH S 178     -44.999  17.799  -9.592  1.00 61.01           O
HETATM  952  O   HOH S 179     -22.979  10.546   6.557  1.00 57.90           O
HETATM  953  O   HOH S 180     -50.650  -2.682  -1.855  1.00 53.67           O
HETATM  954  O   HOH S 181     -20.010  -4.062  -2.271  1.00 63.30           O
HETATM  955  O   HOH S 182     -26.231  10.980   2.725  1.00 57.19           O
HETATM  956  O   HOH S 183     -40.757  21.802  21.032  1.00 52.53           O
HETATM  957  O   HOH S 184     -22.366  23.754   6.664  1.00 52.70           O
HETATM  958  O   HOH S 185     -17.620  16.874   9.928  1.00 53.72           O
HETATM  959  O   HOH S 186     -57.095  17.909  15.719  1.00 66.16           O
HETATM  960  O   HOH S 187     -18.783  16.026  11.426  1.00 60.58           O
HETATM  961  O   HOH S 188     -27.693   7.144   4.736  1.00 63.94           O
HETATM  962  O   HOH S 189     -20.786  -1.938  -2.943  1.00 59.68           O
HETATM  963  O   HOH S 190     -43.043  22.334  -8.650  1.00 59.07           O
HETATM  964  O   HOH S 191     -25.465  21.189   5.027  1.00 65.25           O
HETATM  965  O   HOH S 192     -53.854   8.137   8.008  1.00 63.56           O
HETATM  966  O   HOH S 193     -19.418  12.080  -1.978  1.00 59.25           O
HETATM  967  O   HOH S 194     -52.457   8.480  10.862  1.00 62.76           O
HETATM  968  O   HOH S 195     -41.186  21.432   4.131  1.00 57.64           O
TER
END
