# Supplementary material
Source: publisher figshare collection journal article supplement (https://plos.figshare.com/articles/dataset/_/11411415)
Supplement: Supplementary file 1 [file 1 › pone.0226693.s019.pdb]

REMARK Modified from titin M4 trigonal (6H4L)
REMARK sequence renumbered: original residue number -2
SCALE1      0.011786  0.006805  0.000000        0.00000
SCALE2      0.000000  0.013609  0.000000        0.00000
SCALE3      0.000000  0.000000  0.020335        0.00000
ATOM      1  N   THR A   2     -48.448  11.480  28.935  1.00 62.84           N  
ANISOU    1  N   THR A   2    10515   7518   5842   1360    822     23       N  
ATOM      2  CA  THR A   2     -47.530  11.867  27.869  1.00 57.59           C  
ANISOU    2  CA  THR A   2     9612   6814   5454   1341    550    -91       C  
ATOM      3  C   THR A   2     -47.909  13.234  27.308  1.00 49.47           C  
ANISOU    3  C   THR A   2     8243   5865   4689   1306    553   -210       C  
ATOM      4  O   THR A   2     -48.954  13.382  26.679  1.00 43.84           O  
ANISOU    4  O   THR A   2     7311   5214   4131   1147    742   -126       O  
ATOM      5  CB  THR A   2     -47.530  10.830  26.718  1.00 57.27           C  
ANISOU    5  CB  THR A   2     9486   6696   5580   1129    561     53       C  
ATOM      6  CG2 THR A   2     -46.568  11.243  25.617  1.00 47.36           C  
ANISOU    6  CG2 THR A   2     7987   5410   4596   1110    311    -63       C  
ATOM      7  OG1 THR A   2     -47.146   9.545  27.226  1.00 65.00           O  
ANISOU    7  OG1 THR A   2    10820   7560   6317   1178    551    166       O  
ATOM      8  N   LEU A   3     -47.062  14.232  27.546  1.00 43.56           N  
ANISOU    8  N   LEU A   3     7458   5106   3988   1460    335   -417       N  
ATOM      9  CA  LEU A   3     -47.298  15.569  27.019  1.00 32.86           C  
ANISOU    9  CA  LEU A   3     5836   3770   2879   1440    323   -533       C  
ATOM     10  C   LEU A   3     -47.124  15.595  25.499  1.00 27.53           C  
ANISOU   10  C   LEU A   3     4896   3049   2516   1257    266   -480       C  
ATOM     11  O   LEU A   3     -46.413  14.756  24.925  1.00 34.19           O  
ANISOU   11  O   LEU A   3     5752   3837   3400   1184    158   -431       O  
ATOM     12  CB  LEU A   3     -46.336  16.568  27.657  1.00 37.81           C  
ANISOU   12  CB  LEU A   3     6500   4365   3503   1604     95   -772       C  
ATOM     13  CG  LEU A   3     -46.447  16.729  29.176  1.00 45.82           C  
ANISOU   13  CG  LEU A   3     7710   5443   4257   1754     97   -811       C  
ATOM     14  CD1 LEU A   3     -45.286  17.546  29.717  1.00 54.39           C  
ANISOU   14  CD1 LEU A   3     8747   6508   5409   1830   -189  -1007       C  
ATOM     15  CD2 LEU A   3     -47.773  17.374  29.541  1.00 47.76           C  
ANISOU   15  CD2 LEU A   3     7924   5766   4458   1778    358   -791       C  
ATOM     16  N   ASP A   4     -47.767  16.558  24.847  1.00 32.04           N  
ANISOU   16  N   ASP A   4     5249   3637   3288   1208    337   -492       N  
ATOM     17  CA  ASP A   4     -47.526  16.764  23.419  1.00 25.13           C  
ANISOU   17  CA  ASP A   4     4163   2706   2678   1069    270   -455       C  
ATOM     18  C   ASP A   4     -46.038  16.974  23.174  1.00 30.54           C  
ANISOU   18  C   ASP A   4     4855   3290   3459   1080     46   -591       C  
ATOM     19  O   ASP A   4     -45.338  17.549  24.005  1.00 28.06           O  
ANISOU   19  O   ASP A   4     4626   2945   3091   1207    -75   -769       O  
ATOM     20  CB  ASP A   4     -48.291  17.979  22.892  1.00 25.84           C  
ANISOU   20  CB  ASP A   4     4077   2800   2940   1082    339   -474       C  
ATOM     21  CG  ASP A   4     -49.779  17.743  22.805  1.00 32.42           C  
ANISOU   21  CG  ASP A   4     4804   3765   3751   1050    545   -351       C  
ATOM     22  OD1 ASP A   4     -50.212  16.581  22.954  1.00 32.45           O  
ANISOU   22  OD1 ASP A   4     4847   3841   3644    953    653   -235       O  
ATOM     23  OD2 ASP A   4     -50.514  18.730  22.574  1.00 31.17           O1-
ANISOU   23  OD2 ASP A   4     4516   3632   3697   1123    599   -382       O1-
ATOM     24  N   HIS A   5     -45.552  16.523  22.024  1.00 24.15           N  
ANISOU   24  N   HIS A   5     3939   2440   2798    947     -7   -528       N  
ATOM     25  CA  HIS A   5     -44.138  16.663  21.716  1.00 22.16           C  
ANISOU   25  CA  HIS A   5     3647   2115   2660    938   -186   -665       C  
ATOM     26  C   HIS A   5     -43.891  16.682  20.213  1.00 20.64           C  
ANISOU   26  C   HIS A   5     3291   1876   2676    779   -171   -594       C  
ATOM     27  O   HIS A   5     -44.687  16.163  19.438  1.00 21.93           O  
ANISOU   27  O   HIS A   5     3412   2074   2847    686    -69   -429       O  
ATOM     28  CB  HIS A   5     -43.331  15.528  22.361  1.00 23.90           C  
ANISOU   28  CB  HIS A   5     4015   2354   2710   1022   -310   -700       C  
ATOM     29  CG  HIS A   5     -43.672  14.163  21.845  1.00 21.12           C  
ANISOU   29  CG  HIS A   5     3723   2014   2286    939   -241   -515       C  
ATOM     30  CD2 HIS A   5     -44.469  13.190  22.348  1.00 27.50           C  
ANISOU   30  CD2 HIS A   5     4704   2847   2897    942   -124   -368       C  
ATOM     31  ND1 HIS A   5     -43.176  13.675  20.654  1.00 22.71           N  
ANISOU   31  ND1 HIS A   5     3813   2184   2632    824   -273   -475       N  
ATOM     32  CE1 HIS A   5     -43.643  12.454  20.454  1.00 24.76           C  
ANISOU   32  CE1 HIS A   5     4179   2441   2789    768   -205   -324       C  
ATOM     33  NE2 HIS A   5     -44.430  12.136  21.466  1.00 27.58           N  
ANISOU   33  NE2 HIS A   5     4708   2823   2948    823   -108   -252       N  
ATOM     34  N   ALA A   6     -42.778  17.295  19.827  1.00 22.72           N  
ANISOU   34  N   ALA A   6     3464   2065   3104    743   -269   -734       N  
ATOM     35  CA  ALA A   6     -42.375  17.379  18.430  1.00 19.65           C  
ANISOU   35  CA  ALA A   6     2947   1625   2895    596   -236   -681       C  
ATOM     36  C   ALA A   6     -42.132  15.989  17.845  1.00 18.70           C  
ANISOU   36  C   ALA A   6     2835   1556   2715    548   -250   -587       C  
ATOM     37  O   ALA A   6     -41.716  15.061  18.545  1.00 22.45           O  
ANISOU   37  O   ALA A   6     3402   2068   3059    635   -339   -626       O  
ATOM     38  CB  ALA A   6     -41.125  18.222  18.299  1.00 22.42           C  
ANISOU   38  CB  ALA A   6     3192   1913   3413    534   -299   -851       C  
ATOM     39  N   PRO A   7     -42.363  15.852  16.542  1.00 20.30           N  
ANISOU   39  N   PRO A   7     2968   1745   3001    428   -172   -467       N  
ATOM     40  CA  PRO A   7     -42.106  14.549  15.935  1.00 18.61           C  
ANISOU   40  CA  PRO A   7     2773   1562   2734    384   -188   -400       C  
ATOM     41  C   PRO A   7     -40.642  14.139  16.104  1.00 18.39           C  
ANISOU   41  C   PRO A   7     2710   1529   2748    431   -306   -562       C  
ATOM     42  O   PRO A   7     -39.742  14.985  16.008  1.00 20.28           O  
ANISOU   42  O   PRO A   7     2830   1736   3138    406   -334   -708       O  
ATOM     43  CB  PRO A   7     -42.398  14.811  14.453  1.00 17.52           C  
ANISOU   43  CB  PRO A   7     2559   1405   2693    260    -99   -295       C  
ATOM     44  CG  PRO A   7     -43.363  15.963  14.451  1.00 18.84           C  
ANISOU   44  CG  PRO A   7     2710   1552   2896    269    -31   -237       C  
ATOM     45  CD  PRO A   7     -42.883  16.840  15.577  1.00 20.56           C  
ANISOU   45  CD  PRO A   7     2937   1724   3151    351    -76   -389       C  
ATOM     46  N   ARG A   8     -40.411  12.855  16.351  1.00 19.73           N  
ANISOU   46  N   ARG A   8     2977   1722   2796    499   -373   -545       N  
ATOM     47  CA  ARG A   8     -39.065  12.306  16.393  1.00 21.48           C  
ANISOU   47  CA  ARG A   8     3154   1955   3052    581   -500   -698       C  
ATOM     48  C   ARG A   8     -39.057  11.015  15.580  1.00 21.87           C  
ANISOU   48  C   ARG A   8     3269   1994   3048    558   -480   -604       C  
ATOM     49  O   ARG A   8     -39.946  10.167  15.714  1.00 20.87           O  
ANISOU   49  O   ARG A   8     3309   1841   2778    550   -442   -457       O  
ATOM     50  CB  ARG A   8     -38.607  12.057  17.829  1.00 30.88           C  
ANISOU   50  CB  ARG A   8     4437   3191   4104    758   -652   -798       C  
ATOM     51  CG  ARG A   8     -39.582  11.271  18.644  1.00 30.44           C  
ANISOU   51  CG  ARG A   8     4648   3099   3817    848   -636   -667       C  
ATOM     52  CD  ARG A   8     -39.306  11.416  20.152  1.00 37.51           C  
ANISOU   52  CD  ARG A   8     5658   4045   4548   1021   -761   -753       C  
ATOM     53  NE  ARG A   8     -40.249  10.597  20.900  1.00 37.64           N  
ANISOU   53  NE  ARG A   8     5983   4003   4318   1105   -700   -611       N  
ATOM     54  CZ  ARG A   8     -40.886  10.980  21.998  1.00 38.45           C  
ANISOU   54  CZ  ARG A   8     6231   4122   4255   1184   -660   -595       C  
ATOM     55  NH1 ARG A   8     -40.675  12.185  22.515  1.00 36.91           N1+
ANISOU   55  NH1 ARG A   8     5919   3986   4119   1218   -713   -736       N1+
ATOM     56  NH2 ARG A   8     -41.732  10.143  22.579  1.00 42.32           N  
ANISOU   56  NH2 ARG A   8     6978   4578   4523   1199   -545   -425       N  
ATOM     57  N   ILE A   9     -38.064  10.884  14.716  1.00 19.60           N  
ANISOU   57  N   ILE A   9     2846   1721   2882    533   -489   -699       N  
ATOM     58  CA  ILE A   9     -37.992   9.723  13.847  1.00 18.64           C  
ANISOU   58  CA  ILE A   9     2785   1581   2715    521   -468   -636       C  
ATOM     59  C   ILE A   9     -37.119   8.682  14.519  1.00 21.59           C  
ANISOU   59  C   ILE A   9     3229   1977   2997    704   -616   -726       C  
ATOM     60  O   ILE A   9     -35.954   8.943  14.826  1.00 28.38           O  
ANISOU   60  O   ILE A   9     3929   2917   3935    790   -712   -895       O  
ATOM     61  CB  ILE A   9     -37.461  10.119  12.466  1.00 20.75           C  
ANISOU   61  CB  ILE A   9     2884   1871   3130    398   -359   -669       C  
ATOM     62  CG1 ILE A   9     -38.457  11.085  11.806  1.00 20.91           C  
ANISOU   62  CG1 ILE A   9     2889   1873   3183    238   -219   -526       C  
ATOM     63  CG2 ILE A   9     -37.210   8.864  11.594  1.00 22.99           C  
ANISOU   63  CG2 ILE A   9     3236   2144   3357    420   -353   -650       C  
ATOM     64  CD1 ILE A   9     -37.990  11.707  10.509  1.00 26.05           C  
ANISOU   64  CD1 ILE A   9     3424   2525   3948    118    -87   -533       C  
ATOM     65  N   THR A  10     -37.704   7.515  14.774  1.00 20.25           N  
ANISOU   65  N   THR A  10     3289   1745   2658    748   -630   -601       N  
ATOM     66  CA  THR A  10     -37.009   6.448  15.491  1.00 22.56           C  
ANISOU   66  CA  THR A  10     3705   2048   2819    928   -768   -636       C  
ATOM     67  C   THR A  10     -36.480   5.323  14.594  1.00 24.70           C  
ANISOU   67  C   THR A  10     4000   2295   3091    955   -773   -645       C  
ATOM     68  O   THR A  10     -35.646   4.523  15.026  1.00 27.90           O  
ANISOU   68  O   THR A  10     4461   2719   3419   1126   -905   -711       O  
ATOM     69  CB  THR A  10     -37.901   5.822  16.577  1.00 26.41           C  
ANISOU   69  CB  THR A  10     4491   2456   3087    981   -776   -498       C  
ATOM     70  CG2 THR A  10     -38.393   6.887  17.561  1.00 28.05           C  
ANISOU   70  CG2 THR A  10     4701   2691   3264    994   -772   -506       C  
ATOM     71  OG1 THR A  10     -39.012   5.162  15.958  1.00 28.70           O  
ANISOU   71  OG1 THR A  10     4927   2641   3337    826   -638   -335       O  
ATOM     72  N   LEU A  11     -36.990   5.239  13.368  1.00 21.85           N  
ANISOU   72  N   LEU A  11     3618   1888   2797    802   -643   -584       N  
ATOM     73  CA  LEU A  11     -36.476   4.301  12.373  1.00 24.47           C  
ANISOU   73  CA  LEU A  11     3959   2201   3139    823   -631   -618       C  
ATOM     74  C   LEU A  11     -36.376   5.068  11.070  1.00 20.80           C  
ANISOU   74  C   LEU A  11     3316   1766   2822    697   -513   -674       C  
ATOM     75  O   LEU A  11     -37.376   5.614  10.587  1.00 22.17           O  
ANISOU   75  O   LEU A  11     3515   1900   3007    538   -421   -573       O  
ATOM     76  CB  LEU A  11     -37.411   3.105  12.162  1.00 22.13           C  
ANISOU   76  CB  LEU A  11     3917   1783   2710    755   -593   -471       C  
ATOM     77  CG  LEU A  11     -36.978   2.240  10.967  1.00 26.90           C  
ANISOU   77  CG  LEU A  11     4530   2361   3332    758   -568   -519       C  
ATOM     78  CD1 LEU A  11     -35.717   1.467  11.318  1.00 31.55           C  
ANISOU   78  CD1 LEU A  11     5120   2978   3891    980   -689   -630       C  
ATOM     79  CD2 LEU A  11     -38.088   1.311  10.517  1.00 34.23           C  
ANISOU   79  CD2 LEU A  11     5663   3172   4170    617   -509   -391       C  
ATOM     80  N   ARG A  12     -35.172   5.127  10.517  1.00 24.75           N  
ANISOU   80  N   ARG A  12     3635   2342   3426    771   -512   -835       N  
ATOM     81  CA  ARG A  12     -34.946   5.960   9.346  1.00 22.98           C  
ANISOU   81  CA  ARG A  12     3236   2156   3338    647   -367   -900       C  
ATOM     82  C   ARG A  12     -35.001   5.152   8.057  1.00 22.46           C  
ANISOU   82  C   ARG A  12     3254   2067   3214    613   -281   -877       C  
ATOM     83  O   ARG A  12     -34.749   3.948   8.054  1.00 24.68           O  
ANISOU   83  O   ARG A  12     3667   2299   3410    740   -355   -906       O  
ATOM     84  CB  ARG A  12     -33.607   6.689   9.466  1.00 29.92           C  
ANISOU   84  CB  ARG A  12     3820   3149   4397    702   -364  -1115       C  
ATOM     85  CG  ARG A  12     -33.585   7.680  10.639  1.00 30.26           C  
ANISOU   85  CG  ARG A  12     3770   3225   4505    696   -444  -1150       C  
ATOM     86  CD  ARG A  12     -32.576   8.810  10.463  1.00 41.63           C  
ANISOU   86  CD  ARG A  12     4893   4751   6173    618   -369  -1342       C  
ATOM     87  NE  ARG A  12     -32.774   9.856  11.472  1.00 42.35           N  
ANISOU   87  NE  ARG A  12     4935   4835   6322    579   -434  -1370       N  
ATOM     88  CZ  ARG A  12     -33.411  11.005  11.254  1.00 42.23           C  
ANISOU   88  CZ  ARG A  12     4916   4769   6361    386   -299  -1263       C  
ATOM     89  NH1 ARG A  12     -33.903  11.280  10.054  1.00 37.31           N1+
ANISOU   89  NH1 ARG A  12     4338   4107   5732    222   -101  -1111       N1+
ATOM     90  NH2 ARG A  12     -33.545  11.891  12.235  1.00 43.44           N  
ANISOU   90  NH2 ARG A  12     5040   4904   6562    380   -373  -1317       N  
ATOM     91  N   MET A  13     -35.342   5.832   6.965  1.00 23.29           N  
ANISOU   91  N   MET A  13     3299   2211   3338    438   -119   -806       N  
ATOM     92  CA  MET A  13     -35.348   5.203   5.650  1.00 22.16           C  
ANISOU   92  CA  MET A  13     3235   2067   3120    407    -30   -802       C  
ATOM     93  C   MET A  13     -33.989   4.660   5.240  1.00 29.23           C  
ANISOU   93  C   MET A  13     4014   3020   4071    554      0  -1002       C  
ATOM     94  O   MET A  13     -32.946   5.166   5.661  1.00 29.07           O  
ANISOU   94  O   MET A  13     3762   3087   4198    619      9  -1153       O  
ATOM     95  CB  MET A  13     -35.818   6.199   4.600  1.00 25.36           C  
ANISOU   95  CB  MET A  13     3603   2516   3517    227    136   -696       C  
ATOM     96  CG  MET A  13     -37.308   6.466   4.630  1.00 26.41           C  
ANISOU   96  CG  MET A  13     3869   2604   3561    111     98   -509       C  
ATOM     97  SD  MET A  13     -37.745   7.594   3.284  1.00 33.87           S  
ANISOU   97  SD  MET A  13     4810   3596   4462    -30    263   -393       S  
ATOM     98  CE  MET A  13     -37.118   9.050   4.086  1.00 16.23           C  
ANISOU   98  CE  MET A  13     2382   1371   2415    -65    338   -420       C  
ATOM     99  N   ARG A  14     -34.022   3.637   4.393  1.00 23.95           N  
ANISOU   99  N   ARG A  14     3495   2311   3294    605     15  -1024       N  
ATOM    100  CA  ARG A  14     -32.821   2.980   3.895  1.00 24.71           C  
ANISOU  100  CA  ARG A  14     3504   2462   3421    772     52  -1222       C  
ATOM    101  C   ARG A  14     -32.598   3.314   2.434  1.00 29.63           C  
ANISOU  101  C   ARG A  14     4079   3169   4009    666    278  -1236       C  
ATOM    102  O   ARG A  14     -33.467   3.075   1.602  1.00 30.75           O  
ANISOU  102  O   ARG A  14     4423   3261   4001    569    312  -1121       O  
ATOM    103  CB  ARG A  14     -32.966   1.459   3.995  1.00 35.53           C  
ANISOU  103  CB  ARG A  14     5115   3716   4669    912    -82  -1220       C  
ATOM    104  CG  ARG A  14     -32.923   0.902   5.408  1.00 49.54           C  
ANISOU  104  CG  ARG A  14     6942   5445   6436   1012   -267  -1153       C  
ATOM    105  CD  ARG A  14     -31.687   0.031   5.602  1.00 62.29           C  
ANISOU  105  CD  ARG A  14     8487   7112   8069   1231   -343  -1281       C  
ATOM    106  NE  ARG A  14     -31.682  -0.642   6.897  1.00 72.59           N  
ANISOU  106  NE  ARG A  14     9913   8358   9309   1355   -536  -1217       N  
ATOM    107  CZ  ARG A  14     -32.320  -1.781   7.147  1.00 79.30           C  
ANISOU  107  CZ  ARG A  14    11047   9057  10025   1372   -612  -1102       C  
ATOM    108  NH1 ARG A  14     -33.019  -2.370   6.187  1.00 85.65           N1+
ANISOU  108  NH1 ARG A  14    12014   9761  10769   1261   -531  -1052       N1+
ATOM    109  NH2 ARG A  14     -32.261  -2.333   8.354  1.00 75.93           N  
ANISOU  109  NH2 ARG A  14    10756   8579   9514   1497   -768  -1047       N  
ATOM    110  N   SER A  15     -31.422   3.837   2.113  1.00 29.78           N  
ANISOU  110  N   SER A  15     3835   3321   4160    687    434  -1389       N  
ATOM    111  CA  SER A  15     -31.061   4.020   0.716  1.00 30.82           C  
ANISOU  111  CA  SER A  15     3946   3532   4232    614    685  -1417       C  
ATOM    112  C   SER A  15     -30.942   2.644   0.077  1.00 33.65           C  
ANISOU  112  C   SER A  15     4485   3853   4447    786    641  -1513       C  
ATOM    113  O   SER A  15     -30.343   1.735   0.648  1.00 36.26           O  
ANISOU  113  O   SER A  15     4792   4163   4824   1005    499  -1660       O  
ATOM    114  CB  SER A  15     -29.748   4.800   0.593  1.00 36.75           C  
ANISOU  114  CB  SER A  15     4347   4434   5181    586    892  -1586       C  
ATOM    115  OG  SER A  15     -29.883   6.112   1.133  1.00 34.20           O  
ANISOU  115  OG  SER A  15     3887   4112   4996    402    940  -1504       O  
ATOM    116  N   HIS A  16     -31.518   2.474  -1.105  1.00 29.43           N  
ANISOU  116  N   HIS A  16     4156   3302   3724    704    746  -1432       N  
ATOM    117  CA  HIS A  16     -31.470   1.166  -1.734  1.00 33.99           C  
ANISOU  117  CA  HIS A  16     4936   3823   4157    860    696  -1538       C  
ATOM    118  C   HIS A  16     -31.602   1.186  -3.250  1.00 34.48           C  
ANISOU  118  C   HIS A  16     5138   3940   4022    796    891  -1527       C  
ATOM    119  O   HIS A  16     -31.854   2.222  -3.869  1.00 33.49           O  
ANISOU  119  O   HIS A  16     4999   3884   3843    627   1064  -1401       O  
ATOM    120  CB  HIS A  16     -32.508   0.215  -1.114  1.00 37.92           C  
ANISOU  120  CB  HIS A  16     5704   4129   4574    887    429  -1456       C  
ATOM    121  CG  HIS A  16     -33.928   0.628  -1.345  1.00 34.76           C  
ANISOU  121  CG  HIS A  16     5470   3673   4063    670    380  -1247       C  
ATOM    122  CD2 HIS A  16     -34.869   0.156  -2.198  1.00 34.75           C  
ANISOU  122  CD2 HIS A  16     5708   3613   3881    589    337  -1194       C  
ATOM    123  ND1 HIS A  16     -34.533   1.644  -0.635  1.00 34.04           N  
ANISOU  123  ND1 HIS A  16     5283   3597   4055    526    352  -1088       N  
ATOM    124  CE1 HIS A  16     -35.781   1.785  -1.045  1.00 31.22           C  
ANISOU  124  CE1 HIS A  16     5081   3203   3579    379    299   -943       C  
ATOM    125  NE2 HIS A  16     -36.011   0.893  -1.990  1.00 33.84           N  
ANISOU  125  NE2 HIS A  16     5610   3496   3754    407    279  -1009       N  
ATOM    126  N   ARG A  17     -31.411   0.009  -3.828  1.00 34.18           N  
ANISOU  126  N   ARG A  17     5269   3858   3861    956    857  -1666       N  
ATOM    127  CA  ARG A  17     -31.499  -0.188  -5.266  1.00 37.09           C  
ANISOU  127  CA  ARG A  17     5815   4274   4002    944   1015  -1696       C  
ATOM    128  C   ARG A  17     -32.775  -0.947  -5.572  1.00 44.47           C  
ANISOU  128  C   ARG A  17     7045   5076   4776    872    786  -1600       C  
ATOM    129  O   ARG A  17     -33.304  -1.664  -4.720  1.00 41.58           O  
ANISOU  129  O   ARG A  17     6734   4571   4493    869    550  -1561       O  
ATOM    130  CB  ARG A  17     -30.304  -0.997  -5.770  1.00 41.07           C  
ANISOU  130  CB  ARG A  17     6193   4866   4546   1113   1113  -1912       C  
ATOM    131  CG  ARG A  17     -28.958  -0.330  -5.574  1.00 50.37           C  
ANISOU  131  CG  ARG A  17     7068   6196   5876   1204   1333  -1981       C  
ATOM    132  N   VAL A  18     -33.272  -0.781  -6.789  1.00 39.08           N  
ANISOU  132  N   VAL A  18     6537   4444   3868    798    865  -1553       N  
ATOM    133  CA  VAL A  18     -34.414  -1.548  -7.251  1.00 40.96           C  
ANISOU  133  CA  VAL A  18     7014   4588   3962    733    651  -1509       C  
ATOM    134  C   VAL A  18     -34.251  -1.765  -8.744  1.00 39.85           C  
ANISOU  134  C   VAL A  18     7002   4547   3594    770    766  -1576       C  
ATOM    135  O   VAL A  18     -33.877  -0.843  -9.471  1.00 39.74           O  
ANISOU  135  O   VAL A  18     6973   4667   3461    753    999  -1532       O  
ATOM    136  CB  VAL A  18     -35.749  -0.835  -6.952  1.00 42.46           C  
ANISOU  136  CB  VAL A  18     7302   4730   4101    558    525  -1329       C  
ATOM    137  CG1 VAL A  18     -35.856   0.458  -7.738  1.00 39.66           C  
ANISOU  137  CG1 VAL A  18     6962   4508   3599    482    713  -1207       C  
ATOM    138  CG2 VAL A  18     -36.931  -1.753  -7.252  1.00 36.86           C  
ANISOU  138  CG2 VAL A  18     6762   3929   3313    478    279  -1320       C  
ATOM    139  N   PRO A  19     -34.474  -3.004  -9.201  1.00 42.23           N  
ANISOU  139  N   PRO A  19     7434   4774   3839    818    623  -1679       N  
ATOM    140  CA  PRO A  19     -34.424  -3.271 -10.641  1.00 47.18           C  
ANISOU  140  CA  PRO A  19     8208   5489   4230    857    702  -1753       C  
ATOM    141  C   PRO A  19     -35.498  -2.480 -11.380  1.00 47.05           C  
ANISOU  141  C   PRO A  19     8349   5533   3998    737    658  -1609       C  
ATOM    142  O   PRO A  19     -36.618  -2.341 -10.885  1.00 41.25           O  
ANISOU  142  O   PRO A  19     7657   4722   3295    617    455  -1506       O  
ATOM    143  CB  PRO A  19     -34.722  -4.771 -10.729  1.00 47.02           C  
ANISOU  143  CB  PRO A  19     8310   5324   4231    895    504  -1874       C  
ATOM    144  CG  PRO A  19     -34.310  -5.318  -9.406  1.00 43.02           C  
ANISOU  144  CG  PRO A  19     7679   4686   3980    945    427  -1890       C  
ATOM    145  CD  PRO A  19     -34.632  -4.236  -8.409  1.00 43.54           C  
ANISOU  145  CD  PRO A  19     7619   4767   4159    848    419  -1734       C  
ATOM    146  N   CYS A  20     -35.145  -1.959 -12.550  1.00 50.84           N  
ANISOU  146  N   CYS A  20     8903   6155   4260    774    850  -1599       N  
ATOM    147  CA  CYS A  20     -36.099  -1.274 -13.411  1.00 54.59           C  
ANISOU  147  CA  CYS A  20     9553   6694   4496    704    794  -1465       C  
ATOM    148  C   CYS A  20     -37.388  -2.079 -13.535  1.00 42.53           C  
ANISOU  148  C   CYS A  20     8153   5081   2926    644    459  -1504       C  
ATOM    149  O   CYS A  20     -37.354  -3.288 -13.765  1.00 48.49           O  
ANISOU  149  O   CYS A  20     8961   5766   3697    685    354  -1665       O  
ATOM    150  CB  CYS A  20     -35.477  -1.033 -14.789  1.00 64.06           C  
ANISOU  150  CB  CYS A  20    10859   8035   5447    785   1020  -1487       C  
ATOM    151  SG  CYS A  20     -36.644  -0.994 -16.178  1.00 72.75           S  
ANISOU  151  SG  CYS A  20    12241   9195   6207    784    839  -1437       S  
ATOM    152  N   GLY A  21     -38.520  -1.404 -13.357  1.00 41.95           N  
ANISOU  152  N   GLY A  21     8108   5014   2818    540    298  -1365       N  
ATOM    153  CA  GLY A  21     -39.820  -2.025 -13.521  1.00 42.76           C  
ANISOU  153  CA  GLY A  21     8278   5073   2896    459     -9  -1411       C  
ATOM    154  C   GLY A  21     -40.452  -2.604 -12.270  1.00 44.71           C  
ANISOU  154  C   GLY A  21     8409   5174   3405    335   -195  -1424       C  
ATOM    155  O   GLY A  21     -41.653  -2.874 -12.246  1.00 41.23           O  
ANISOU  155  O   GLY A  21     7968   4714   2982    223   -427  -1436       O  
ATOM    156  N   GLN A  22     -39.655  -2.803 -11.227  1.00 37.84           N  
ANISOU  156  N   GLN A  22     7427   4207   2743    354    -90  -1426       N  
ATOM    157  CA  GLN A  22     -40.203  -3.323  -9.985  1.00 36.08           C  
ANISOU  157  CA  GLN A  22     7113   3836   2759    243   -237  -1407       C  
ATOM    158  C   GLN A  22     -40.802  -2.190  -9.164  1.00 37.98           C  
ANISOU  158  C   GLN A  22     7253   4106   3070    142   -265  -1243       C  
ATOM    159  O   GLN A  22     -40.568  -1.014  -9.449  1.00 34.86           O  
ANISOU  159  O   GLN A  22     6859   3824   2562    178   -139  -1144       O  
ATOM    160  CB  GLN A  22     -39.138  -4.068  -9.176  1.00 43.48           C  
ANISOU  160  CB  GLN A  22     7985   4656   3880    335   -147  -1472       C  
ATOM    161  CG  GLN A  22     -38.708  -5.391  -9.797  1.00 51.50           C  
ANISOU  161  CG  GLN A  22     9106   5600   4862    424   -164  -1640       C  
ATOM    162  CD  GLN A  22     -38.029  -6.320  -8.806  1.00 57.26           C  
ANISOU  162  CD  GLN A  22     9790   6173   5793    497   -162  -1682       C  
ATOM    163  NE2 GLN A  22     -37.417  -7.382  -9.318  1.00 59.30           N  
ANISOU  163  NE2 GLN A  22    10139   6370   6022    614   -142  -1830       N  
ATOM    164  OE1 GLN A  22     -38.057  -6.089  -7.594  1.00 47.92           O  
ANISOU  164  OE1 GLN A  22     8506   4925   4778    461   -183  -1580       O  
ATOM    165  N   ASN A  23     -41.585  -2.554  -8.155  1.00 34.10           N  
ANISOU  165  N   ASN A  23     6684   3508   2763     10   -409  -1209       N  
ATOM    166  CA  ASN A  23     -42.115  -1.585  -7.203  1.00 31.80           C  
ANISOU  166  CA  ASN A  23     6283   3230   2570    -85   -433  -1067       C  
ATOM    167  C   ASN A  23     -41.189  -1.519  -6.016  1.00 35.27           C  
ANISOU  167  C   ASN A  23     6630   3581   3191    -32   -310  -1031       C  
ATOM    168  O   ASN A  23     -40.469  -2.466  -5.725  1.00 33.25           O  
ANISOU  168  O   ASN A  23     6377   3230   3025     50   -279  -1108       O  
ATOM    169  CB  ASN A  23     -43.497  -2.011  -6.714  1.00 40.22           C  
ANISOU  169  CB  ASN A  23     7286   4248   3748   -268   -632  -1055       C  
ATOM    170  CG  ASN A  23     -44.419  -2.406  -7.848  1.00 44.19           C  
ANISOU  170  CG  ASN A  23     7845   4829   4116   -317   -792  -1151       C  
ATOM    171  ND2 ASN A  23     -45.146  -3.505  -7.664  1.00 51.19           N  
ANISOU  171  ND2 ASN A  23     8713   5618   5118   -447   -908  -1243       N  
ATOM    172  OD1 ASN A  23     -44.475  -1.737  -8.877  1.00 46.89           O  
ANISOU  172  OD1 ASN A  23     8250   5317   4248   -235   -803  -1144       O  
ATOM    173  N   THR A  24     -41.205  -0.403  -5.310  1.00 28.18           N  
ANISOU  173  N   THR A  24     5602   2732   2371    -61   -250   -900       N  
ATOM    174  CA  THR A  24     -40.389  -0.331  -4.115  1.00 27.11           C  
ANISOU  174  CA  THR A  24     5339   2531   2429     -5   -164   -871       C  
ATOM    175  C   THR A  24     -41.053   0.502  -3.031  1.00 25.13           C  
ANISOU  175  C   THR A  24     4917   2301   2329   -107   -199   -710       C  
ATOM    176  O   THR A  24     -41.995   1.245  -3.289  1.00 26.37           O  
ANISOU  176  O   THR A  24     5022   2549   2448   -195   -251   -610       O  
ATOM    177  CB  THR A  24     -38.985   0.207  -4.439  1.00 30.26           C  
ANISOU  177  CB  THR A  24     5655   3018   2824    139     50   -907       C  
ATOM    178  CG2 THR A  24     -39.011   1.714  -4.631  1.00 28.60           C  
ANISOU  178  CG2 THR A  24     5312   2943   2612     92    176   -755       C  
ATOM    179  OG1 THR A  24     -38.078  -0.156  -3.391  1.00 31.48           O  
ANISOU  179  OG1 THR A  24     5714   3098   3149    239     77   -965       O  
ATOM    180  N   ARG A  25     -40.559   0.363  -1.811  1.00 24.14           N  
ANISOU  180  N   ARG A  25     4717   2095   2361    -67   -181   -696       N  
ATOM    181  CA  ARG A  25     -41.081   1.146  -0.698  1.00 22.95           C  
ANISOU  181  CA  ARG A  25     4418   1963   2340   -140   -197   -560       C  
ATOM    182  C   ARG A  25     -39.953   1.746   0.105  1.00 21.26           C  
ANISOU  182  C   ARG A  25     4062   1769   2246    -28    -97   -558       C  
ATOM    183  O   ARG A  25     -38.886   1.138   0.230  1.00 24.43           O  
ANISOU  183  O   ARG A  25     4485   2124   2671    108    -67   -675       O  
ATOM    184  CB  ARG A  25     -41.895   0.252   0.234  1.00 20.96           C  
ANISOU  184  CB  ARG A  25     4246   1569   2149   -235   -311   -546       C  
ATOM    185  CG  ARG A  25     -43.238  -0.134  -0.302  1.00 24.07           C  
ANISOU  185  CG  ARG A  25     4696   1963   2487   -406   -419   -547       C  
ATOM    186  CD  ARG A  25     -43.971  -1.104   0.614  1.00 26.18           C  
ANISOU  186  CD  ARG A  25     4999   2105   2842   -521   -466   -520       C  
ATOM    187  NE  ARG A  25     -45.277  -1.423   0.045  1.00 29.08           N  
ANISOU  187  NE  ARG A  25     5353   2504   3192   -705   -561   -550       N  
ATOM    188  CZ  ARG A  25     -46.007  -2.482   0.378  1.00 34.50           C  
ANISOU  188  CZ  ARG A  25     6064   3102   3943   -831   -580   -564       C  
ATOM    189  NH1 ARG A  25     -45.550  -3.345   1.278  1.00 31.49           N1+
ANISOU  189  NH1 ARG A  25     5770   2582   3612   -779   -515   -529       N1+
ATOM    190  NH2 ARG A  25     -47.186  -2.683  -0.202  1.00 34.09           N  
ANISOU  190  NH2 ARG A  25     5951   3104   3899  -1004   -671   -625       N  
ATOM    191  N   PHE A  26     -40.215   2.931   0.655  1.00 18.39           N  
ANISOU  191  N   PHE A  26     3547   1477   1964    -75    -60   -444       N  
ATOM    192  CA  PHE A  26     -39.429   3.502   1.745  1.00 18.05           C  
ANISOU  192  CA  PHE A  26     3360   1437   2060     -5    -17   -447       C  
ATOM    193  C   PHE A  26     -40.311   3.477   2.981  1.00 20.34           C  
ANISOU  193  C   PHE A  26     3653   1671   2406    -62   -111   -359       C  
ATOM    194  O   PHE A  26     -41.501   3.755   2.906  1.00 18.91           O  
ANISOU  194  O   PHE A  26     3473   1514   2199   -178   -148   -264       O  
ATOM    195  CB  PHE A  26     -39.030   4.944   1.442  1.00 19.99           C  
ANISOU  195  CB  PHE A  26     3454   1784   2356    -27    117   -396       C  
ATOM    196  CG  PHE A  26     -37.938   5.078   0.396  1.00 21.96           C  
ANISOU  196  CG  PHE A  26     3679   2093   2571     22    274   -485       C  
ATOM    197  CD1 PHE A  26     -36.608   4.920   0.748  1.00 23.60           C  
ANISOU  197  CD1 PHE A  26     3758   2319   2889    123    343   -627       C  
ATOM    198  CD2 PHE A  26     -38.246   5.392  -0.915  1.00 24.67           C  
ANISOU  198  CD2 PHE A  26     4120   2487   2766    -24    358   -433       C  
ATOM    199  CE1 PHE A  26     -35.600   5.055  -0.194  1.00 28.80           C  
ANISOU  199  CE1 PHE A  26     4358   3051   3532    154    525   -722       C  
ATOM    200  CE2 PHE A  26     -37.238   5.521  -1.873  1.00 27.02           C  
ANISOU  200  CE2 PHE A  26     4414   2842   3011     14    546   -507       C  
ATOM    201  CZ  PHE A  26     -35.917   5.353  -1.507  1.00 28.30           C  
ANISOU  201  CZ  PHE A  26     4418   3027   3307     90    647   -654       C  
ATOM    202  N   ILE A  27     -39.727   3.159   4.123  1.00 18.03           N  
ANISOU  202  N   ILE A  27     3356   1315   2179     36   -149   -399       N  
ATOM    203  CA  ILE A  27     -40.511   3.065   5.356  1.00 17.61           C  
ANISOU  203  CA  ILE A  27     3345   1201   2146     -6   -211   -313       C  
ATOM    204  C   ILE A  27     -39.743   3.759   6.467  1.00 20.01           C  
ANISOU  204  C   ILE A  27     3536   1534   2533    108   -215   -340       C  
ATOM    205  O   ILE A  27     -38.535   3.597   6.578  1.00 19.72           O  
ANISOU  205  O   ILE A  27     3453   1505   2536    253   -228   -461       O  
ATOM    206  CB  ILE A  27     -40.775   1.597   5.742  1.00 22.42           C  
ANISOU  206  CB  ILE A  27     4164   1663   2692      3   -280   -323       C  
ATOM    207  CG1 ILE A  27     -41.578   0.890   4.646  1.00 20.54           C  
ANISOU  207  CG1 ILE A  27     4021   1396   2387   -132   -293   -327       C  
ATOM    208  CG2 ILE A  27     -41.547   1.521   7.057  1.00 26.94           C  
ANISOU  208  CG2 ILE A  27     4762   2208   3264    -46   -290   -214       C  
ATOM    209  CD1 ILE A  27     -41.609  -0.630   4.778  1.00 25.00           C  
ANISOU  209  CD1 ILE A  27     4734   1858   2905   -116   -328   -346       C  
ATOM    210  N   LEU A  28     -40.444   4.548   7.274  1.00 17.23           N  
ANISOU  210  N   LEU A  28     3124   1213   2211     50   -209   -249       N  
ATOM    211  CA  LEU A  28     -39.821   5.117   8.469  1.00 18.10           C  
ANISOU  211  CA  LEU A  28     3162   1338   2379    161   -241   -290       C  
ATOM    212  C   LEU A  28     -40.830   5.098   9.597  1.00 17.86           C  
ANISOU  212  C   LEU A  28     3219   1269   2298    123   -260   -187       C  
ATOM    213  O   LEU A  28     -42.004   4.822   9.393  1.00 18.91           O  
ANISOU  213  O   LEU A  28     3409   1387   2391    -12   -226    -88       O  
ATOM    214  CB  LEU A  28     -39.286   6.527   8.229  1.00 19.85           C  
ANISOU  214  CB  LEU A  28     3174   1656   2712    147   -173   -330       C  
ATOM    215  CG  LEU A  28     -40.243   7.673   7.932  1.00 16.87           C  
ANISOU  215  CG  LEU A  28     2726   1324   2358     24   -102   -216       C  
ATOM    216  CD1 LEU A  28     -39.620   9.008   8.288  1.00 20.30           C  
ANISOU  216  CD1 LEU A  28     3010   1790   2912     38    -57   -268       C  
ATOM    217  CD2 LEU A  28     -40.580   7.670   6.429  1.00 18.36           C  
ANISOU  217  CD2 LEU A  28     2932   1542   2500    -63    -38   -167       C  
ATOM    218  N   ASN A  29     -40.361   5.331  10.819  1.00 17.67           N  
ANISOU  218  N   ASN A  29     3206   1238   2271    248   -314   -225       N  
ATOM    219  CA  ASN A  29     -41.272   5.386  11.940  1.00 20.72           C  
ANISOU  219  CA  ASN A  29     3688   1598   2586    225   -301   -129       C  
ATOM    220  C   ASN A  29     -41.088   6.691  12.689  1.00 19.95           C  
ANISOU  220  C   ASN A  29     3452   1583   2545    279   -304   -167       C  
ATOM    221  O   ASN A  29     -39.956   7.066  12.997  1.00 18.10           O  
ANISOU  221  O   ASN A  29     3137   1375   2363    407   -379   -299       O  
ATOM    222  CB  ASN A  29     -40.988   4.244  12.908  1.00 19.10           C  
ANISOU  222  CB  ASN A  29     3703   1303   2252    346   -364   -122       C  
ATOM    223  CG  ASN A  29     -42.028   4.143  13.991  1.00 21.33           C  
ANISOU  223  CG  ASN A  29     4136   1540   2430    296   -302     -4       C  
ATOM    224  ND2 ASN A  29     -41.686   4.632  15.170  1.00 24.90           N  
ANISOU  224  ND2 ASN A  29     4630   2011   2820    442   -351    -34       N  
ATOM    225  OD1 ASN A  29     -43.126   3.639  13.776  1.00 22.83           O  
ANISOU  225  OD1 ASN A  29     4390   1690   2595    124   -205     98       O  
ATOM    226  N   VAL A  30     -42.196   7.383  12.934  1.00 17.18           N  
ANISOU  226  N   VAL A  30     3057   1276   2196    182   -226    -75       N  
ATOM    227  CA  VAL A  30     -42.160   8.666  13.649  1.00 18.73           C  
ANISOU  227  CA  VAL A  30     3147   1530   2441    233   -221   -114       C  
ATOM    228  C   VAL A  30     -43.018   8.558  14.904  1.00 18.97           C  
ANISOU  228  C   VAL A  30     3300   1556   2353    260   -186    -46       C  
ATOM    229  O   VAL A  30     -44.077   7.919  14.901  1.00 19.21           O  
ANISOU  229  O   VAL A  30     3408   1573   2320    155   -103     66       O  
ATOM    230  CB  VAL A  30     -42.645   9.831  12.740  1.00 21.16           C  
ANISOU  230  CB  VAL A  30     3286   1894   2862    131   -147    -80       C  
ATOM    231  CG1 VAL A  30     -44.112   9.645  12.356  1.00 21.51           C  
ANISOU  231  CG1 VAL A  30     3330   1973   2869     17    -76     49       C  
ATOM    232  CG2 VAL A  30     -42.396  11.201  13.399  1.00 18.52           C  
ANISOU  232  CG2 VAL A  30     2860   1575   2601    191   -147   -149       C  
ATOM    233  N   GLN A  31     -42.543   9.176  15.994  1.00 17.64           N  
ANISOU  233  N   GLN A  31     3148   1402   2152    394   -242   -129       N  
ATOM    234  CA  GLN A  31     -43.311   9.312  17.217  1.00 18.45           C  
ANISOU  234  CA  GLN A  31     3367   1518   2126    440   -188    -79       C  
ATOM    235  C   GLN A  31     -43.712  10.773  17.301  1.00 17.70           C  
ANISOU  235  C   GLN A  31     3108   1490   2126    430   -143   -117       C  
ATOM    236  O   GLN A  31     -42.856  11.657  17.255  1.00 21.62           O  
ANISOU  236  O   GLN A  31     3500   1988   2727    486   -221   -245       O  
ATOM    237  CB  GLN A  31     -42.452   8.943  18.426  1.00 21.21           C  
ANISOU  237  CB  GLN A  31     3897   1832   2329    640   -311   -165       C  
ATOM    238  CG  GLN A  31     -42.018   7.471  18.438  1.00 22.06           C  
ANISOU  238  CG  GLN A  31     4222   1840   2319    701   -371   -123       C  
ATOM    239  CD  GLN A  31     -41.103   7.132  19.610  1.00 26.20           C  
ANISOU  239  CD  GLN A  31     4942   2333   2679    956   -534   -216       C  
ATOM    240  NE2 GLN A  31     -40.977   5.834  19.907  1.00 27.99           N  
ANISOU  240  NE2 GLN A  31     5431   2463   2742   1027   -560   -140       N  
ATOM    241  OE1 GLN A  31     -40.512   8.018  20.236  1.00 29.47           O  
ANISOU  241  OE1 GLN A  31     5271   2820   3107   1082   -645   -362       O  
ATOM    242  N   SER A  32     -45.010  11.030  17.368  1.00 18.76           N  
ANISOU  242  N   SER A  32     3209   1674   2245    352    -12    -17       N  
ATOM    243  CA  SER A  32     -45.505  12.408  17.296  1.00 19.33           C  
ANISOU  243  CA  SER A  32     3133   1796   2415    363     32    -45       C  
ATOM    244  C   SER A  32     -46.813  12.529  18.058  1.00 25.79           C  
ANISOU  244  C   SER A  32     3964   2685   3147    364    167     22       C  
ATOM    245  O   SER A  32     -47.685  11.682  17.926  1.00 27.24           O  
ANISOU  245  O   SER A  32     4161   2903   3285    256    265    124       O  
ATOM    246  CB  SER A  32     -45.713  12.801  15.817  1.00 20.12           C  
ANISOU  246  CB  SER A  32     3077   1903   2664    258     42     -1       C  
ATOM    247  OG  SER A  32     -46.159  14.132  15.669  1.00 23.68           O  
ANISOU  247  OG  SER A  32     3424   2369   3204    293     74    -15       O  
ATOM    248  N   LYS A  33     -46.941  13.561  18.887  1.00 23.47           N  
ANISOU  248  N   LYS A  33     3665   2415   2836    480    183    -53       N  
ATOM    249  CA  LYS A  33     -48.206  13.825  19.567  1.00 26.37           C  
ANISOU  249  CA  LYS A  33     4012   2873   3135    500    336    -10       C  
ATOM    250  C   LYS A  33     -48.427  15.333  19.668  1.00 23.43           C  
ANISOU  250  C   LYS A  33     3535   2511   2855    609    333    -97       C  
ATOM    251  O   LYS A  33     -47.664  16.023  20.318  1.00 24.07           O  
ANISOU  251  O   LYS A  33     3692   2535   2919    723    251   -222       O  
ATOM    252  CB  LYS A  33     -48.206  13.206  20.973  1.00 26.76           C  
ANISOU  252  CB  LYS A  33     4283   2926   2959    578    398     -9       C  
ATOM    253  CG  LYS A  33     -49.530  13.348  21.686  1.00 27.57           C  
ANISOU  253  CG  LYS A  33     4363   3135   2977    577    609     39       C  
ATOM    254  CD  LYS A  33     -49.444  12.842  23.128  1.00 31.02           C  
ANISOU  254  CD  LYS A  33     5074   3563   3147    675    688     44       C  
ATOM    255  CE  LYS A  33     -50.775  13.011  23.837  1.00 39.51           C  
ANISOU  255  CE  LYS A  33     6113   4761   4138    663    947     86       C  
ATOM    256  NZ  LYS A  33     -50.746  12.420  25.209  1.00 48.15           N1+
ANISOU  256  NZ  LYS A  33     7524   5840   4932    745   1066    121       N1+
ATOM    257  N   PRO A  34     -49.475  15.860  19.012  1.00 24.61           N  
ANISOU  257  N   PRO A  34     3514   2729   3107    585    405    -46       N  
ATOM    258  CA  PRO A  34     -50.439  15.143  18.175  1.00 27.77           C  
ANISOU  258  CA  PRO A  34     3780   3221   3551    450    472     65       C  
ATOM    259  C   PRO A  34     -49.823  14.557  16.909  1.00 24.28           C  
ANISOU  259  C   PRO A  34     3324   2718   3182    332    365    113       C  
ATOM    260  O   PRO A  34     -48.669  14.833  16.572  1.00 21.99           O  
ANISOU  260  O   PRO A  34     3098   2324   2935    354    260     65       O  
ATOM    261  CB  PRO A  34     -51.452  16.228  17.788  1.00 31.20           C  
ANISOU  261  CB  PRO A  34     4031   3734   4089    536    506     54       C  
ATOM    262  CG  PRO A  34     -50.752  17.516  17.988  1.00 33.52           C  
ANISOU  262  CG  PRO A  34     4392   3912   4432    682    431    -38       C  
ATOM    263  CD  PRO A  34     -49.787  17.297  19.109  1.00 27.50           C  
ANISOU  263  CD  PRO A  34     3812   3081   3554    719    408   -121       C  
ATOM    264  N  ATHR A  35     -50.599  13.727  16.227  0.53 25.73           N  
ANISOU  264  N  ATHR A  35     3417   2976   3385    198    402    189       N  
ATOM    265  N  BTHR A  35     -50.620  13.740  16.226  0.47 25.65           N  
ANISOU  265  N  BTHR A  35     3404   2967   3375    198    403    189       N  
ATOM    266  CA ATHR A  35     -50.124  13.045  15.034  0.53 24.91           C  
ANISOU  266  CA ATHR A  35     3320   2825   3322     87    311    225       C  
ATOM    267  CA BTHR A  35     -50.249  13.132  14.953  0.47 25.23           C  
ANISOU  267  CA BTHR A  35     3336   2877   3372     89    312    228       C  
ATOM    268  C  ATHR A  35     -49.629  14.030  13.984  0.53 22.53           C  
ANISOU  268  C  ATHR A  35     2970   2476   3115    149    214    212       C  
ATOM    269  C  BTHR A  35     -49.547  14.135  14.059  0.47 22.30           C  
ANISOU  269  C  BTHR A  35     2948   2437   3087    163    213    206       C  
ATOM    270  O  ATHR A  35     -50.248  15.066  13.742  0.53 26.10           O  
ANISOU  270  O  ATHR A  35     3325   2967   3626    240    215    214       O  
ATOM    271  O  BTHR A  35     -49.941  15.299  13.997  0.47 23.44           O  
ANISOU  271  O  BTHR A  35     3024   2595   3289    270    215    193       O  
ATOM    272  CB ATHR A  35     -51.211  12.152  14.445  0.53 26.74           C  
ANISOU  272  CB ATHR A  35     3437   3153   3571    -66    353    279       C  
ATOM    273  CB BTHR A  35     -51.500  12.629  14.213  0.47 26.42           C  
ANISOU  273  CB BTHR A  35     3321   3151   3568    -29    341    273       C  
ATOM    274  CG2ATHR A  35     -51.394  10.930  15.319  0.53 27.85           C  
ANISOU  274  CG2ATHR A  35     3698   3269   3614   -182    465    310       C  
ATOM    275  CG2BTHR A  35     -51.137  12.024  12.860  0.47 23.15           C  
ANISOU  275  CG2BTHR A  35     2915   2701   3181   -125    232    296       C  
ATOM    276  OG1ATHR A  35     -52.448  12.877  14.390  0.53 30.86           O  
ANISOU  276  OG1ATHR A  35     3750   3818   4157    -20    401    271       O  
ATOM    277  OG1BTHR A  35     -52.168  11.646  15.013  0.47 28.07           O  
ANISOU  277  OG1BTHR A  35     3545   3404   3715   -148    474    296       O  
ATOM    278  N   ALA A  36     -48.504  13.677  13.374  1.00 23.47           N  
ANISOU  278  N   ALA A  36     3174   2503   3242    109    144    201       N  
ATOM    279  CA  ALA A  36     -47.797  14.527  12.432  1.00 20.65           C  
ANISOU  279  CA  ALA A  36     2814   2072   2959    139     95    192       C  
ATOM    280  C   ALA A  36     -48.533  14.628  11.110  1.00 22.41           C  
ANISOU  280  C   ALA A  36     2967   2350   3196    112     66    267       C  
ATOM    281  O   ALA A  36     -49.140  13.663  10.647  1.00 26.43           O  
ANISOU  281  O   ALA A  36     3437   2938   3667     24     45    298       O  
ATOM    282  CB  ALA A  36     -46.397  13.972  12.184  1.00 24.37           C  
ANISOU  282  CB  ALA A  36     3367   2459   3431     95     56    142       C  
ATOM    283  N   GLU A  37     -48.462  15.812  10.522  1.00 23.27           N  
ANISOU  283  N   GLU A  37     2440   2381   4020    132    446   -298       N  
ATOM    284  CA  GLU A  37     -48.787  15.996   9.110  1.00 25.87           C  
ANISOU  284  CA  GLU A  37     2751   2651   4429    136    267   -166       C  
ATOM    285  C   GLU A  37     -47.533  15.592   8.357  1.00 20.94           C  
ANISOU  285  C   GLU A  37     2296   2068   3592     84    204    -95       C  
ATOM    286  O   GLU A  37     -46.426  16.000   8.732  1.00 22.27           O  
ANISOU  286  O   GLU A  37     2538   2239   3683     79    263   -143       O  
ATOM    287  CB  GLU A  37     -49.103  17.459   8.818  1.00 28.52           C  
ANISOU  287  CB  GLU A  37     3009   2843   4984    213    207   -152       C  
ATOM    288  CG  GLU A  37     -50.361  17.982   9.481  1.00 55.56           C  
ANISOU  288  CG  GLU A  37     6232   6208   8669    289    270   -245       C  
ATOM    289  CD  GLU A  37     -51.628  17.354   8.930  1.00 72.61           C  
ANISOU  289  CD  GLU A  37     8241   8390  10957    291    172   -194       C  
ATOM    290  OE1 GLU A  37     -51.671  17.055   7.717  1.00 77.60           O  
ANISOU  290  OE1 GLU A  37     8925   9018  11541    270    -24    -58       O  
ATOM    291  OE2 GLU A  37     -52.577  17.149   9.716  1.00 79.39           O1-
ANISOU  291  OE2 GLU A  37     8928   9275  11960    303    298   -301       O1-
ATOM    292  N   VAL A  38     -47.690  14.782   7.313  1.00 21.17           N  
ANISOU  292  N   VAL A  38     2375   2134   3536     42     90     -2       N  
ATOM    293  CA  VAL A  38     -46.537  14.254   6.600  1.00 17.56           C  
ANISOU  293  CA  VAL A  38     2071   1730   2873     -7     63     38       C  
ATOM    294  C   VAL A  38     -46.573  14.730   5.154  1.00 18.81           C  
ANISOU  294  C   VAL A  38     2295   1844   3009    -21    -78    165       C  
ATOM    295  O   VAL A  38     -47.623  14.674   4.493  1.00 24.58           O  
ANISOU  295  O   VAL A  38     2978   2550   3812    -10   -216    231       O  
ATOM    296  CB  VAL A  38     -46.520  12.705   6.645  1.00 17.80           C  
ANISOU  296  CB  VAL A  38     2153   1844   2767    -51     72     14       C  
ATOM    297  CG1 VAL A  38     -45.304  12.165   5.940  1.00 22.17           C  
ANISOU  297  CG1 VAL A  38     2844   2447   3134    -82     62     22       C  
ATOM    298  CG2 VAL A  38     -46.524  12.229   8.114  1.00 22.34           C  
ANISOU  298  CG2 VAL A  38     2702   2452   3335    -41    210    -78       C  
ATOM    299  N   LYS A  39     -45.437  15.236   4.683  1.00 17.66           N  
ANISOU  299  N   LYS A  39     2256   1689   2765    -51    -46    198       N  
ATOM    300  CA  LYS A  39     -45.281  15.548   3.262  1.00 17.96           C  
ANISOU  300  CA  LYS A  39     2415   1705   2704    -88   -147    332       C  
ATOM    301  C   LYS A  39     -44.089  14.789   2.703  1.00 19.58           C  
ANISOU  301  C   LYS A  39     2746   2008   2684   -156    -74    307       C  
ATOM    302  O   LYS A  39     -43.092  14.598   3.396  1.00 20.78           O  
ANISOU  302  O   LYS A  39     2879   2201   2815   -164     55    206       O  
ATOM    303  CB  LYS A  39     -45.097  17.054   3.052  1.00 21.29           C  
ANISOU  303  CB  LYS A  39     2856   1992   3242    -76   -151    420       C  
ATOM    304  CG  LYS A  39     -46.316  17.869   3.436  1.00 29.44           C  
ANISOU  304  CG  LYS A  39     3760   2902   4524     14   -242    443       C  
ATOM    305  CD  LYS A  39     -46.107  19.338   3.094  1.00 33.65           C  
ANISOU  305  CD  LYS A  39     4344   3262   5179     29   -266    549       C  
ATOM    306  CE  LYS A  39     -47.315  20.178   3.486  1.00 45.39           C  
ANISOU  306  CE  LYS A  39     5687   4605   6955    147   -362    553       C  
ATOM    307  NZ  LYS A  39     -48.550  19.687   2.821  1.00 58.37           N1+
ANISOU  307  NZ  LYS A  39     7274   6276   8629    200   -564    628       N1+
ATOM    308  N   TRP A  40     -44.195  14.366   1.441  1.00 18.64           N  
ANISOU  308  N   TRP A  40     2751   1929   2400   -199   -164    386       N  
ATOM    309  CA  TRP A  40     -43.127  13.616   0.805  1.00 20.44           C  
ANISOU  309  CA  TRP A  40     3096   2253   2417   -258    -78    341       C  
ATOM    310  C   TRP A  40     -42.597  14.388  -0.384  1.00 21.73           C  
ANISOU  310  C   TRP A  40     3413   2401   2442   -326    -61    465       C  
ATOM    311  O   TRP A  40     -43.361  15.061  -1.063  1.00 22.40           O  
ANISOU  311  O   TRP A  40     3567   2420   2525   -322   -201    611       O  
ATOM    312  CB  TRP A  40     -43.658  12.273   0.314  1.00 20.68           C  
ANISOU  312  CB  TRP A  40     3173   2355   2329   -266   -171    293       C  
ATOM    313  CG  TRP A  40     -43.853  11.239   1.404  1.00 18.82           C  
ANISOU  313  CG  TRP A  40     2834   2137   2179   -230   -135    171       C  
ATOM    314  CD1 TRP A  40     -45.000  10.975   2.090  1.00 21.57           C  
ANISOU  314  CD1 TRP A  40     3070   2450   2676   -203   -204    162       C  
ATOM    315  CD2 TRP A  40     -42.873  10.309   1.873  1.00 18.82           C  
ANISOU  315  CD2 TRP A  40     2846   2185   2118   -221    -22     52       C  
ATOM    316  CE2 TRP A  40     -43.489   9.517   2.867  1.00 17.76           C  
ANISOU  316  CE2 TRP A  40     2638   2030   2079   -191    -35      0       C  
ATOM    317  CE3 TRP A  40     -41.533  10.067   1.553  1.00 19.81           C  
ANISOU  317  CE3 TRP A  40     3028   2365   2135   -232     93    -16       C  
ATOM    318  NE1 TRP A  40     -44.788   9.940   2.987  1.00 17.97           N  
ANISOU  318  NE1 TRP A  40     2584   2012   2230   -193   -126     64       N  
ATOM    319  CZ2 TRP A  40     -42.805   8.485   3.524  1.00 18.26           C  
ANISOU  319  CZ2 TRP A  40     2716   2108   2112   -162     34    -94       C  
ATOM    320  CZ3 TRP A  40     -40.862   9.058   2.209  1.00 22.99           C  
ANISOU  320  CZ3 TRP A  40     3407   2789   2540   -187    152   -134       C  
ATOM    321  CH2 TRP A  40     -41.492   8.291   3.193  1.00 19.10           C  
ANISOU  321  CH2 TRP A  40     2871   2259   2127   -147    110   -161       C  
ATOM    322  N   TYR A  41     -41.294  14.280  -0.622  1.00 21.78           N  
ANISOU  322  N   TYR A  41     3469   2465   2339   -386    111    409       N  
ATOM    323  CA  TYR A  41     -40.640  15.005  -1.711  1.00 23.66           C  
ANISOU  323  CA  TYR A  41     3862   2696   2433   -480    191    524       C  
ATOM    324  C   TYR A  41     -39.728  14.086  -2.502  1.00 26.77           C  
ANISOU  324  C   TYR A  41     4353   3222   2598   -541    322    434       C  
ATOM    325  O   TYR A  41     -39.140  13.154  -1.956  1.00 25.08           O  
ANISOU  325  O   TYR A  41     4041   3079   2411   -507    403    261       O  
ATOM    326  CB  TYR A  41     -39.808  16.166  -1.145  1.00 27.30           C  
ANISOU  326  CB  TYR A  41     4247   3068   3057   -520    337    535       C  
ATOM    327  CG  TYR A  41     -40.612  17.159  -0.352  1.00 24.59           C  
ANISOU  327  CG  TYR A  41     3812   2576   2954   -456    234    594       C  
ATOM    328  CD1 TYR A  41     -41.032  18.356  -0.917  1.00 27.52           C  
ANISOU  328  CD1 TYR A  41     4282   2801   3372   -478    167    783       C  
ATOM    329  CD2 TYR A  41     -40.950  16.901   0.975  1.00 24.25           C  
ANISOU  329  CD2 TYR A  41     3595   2530   3087   -369    212    459       C  
ATOM    330  CE1 TYR A  41     -41.780  19.267  -0.187  1.00 25.17           C  
ANISOU  330  CE1 TYR A  41     3887   2350   3327   -401     76    813       C  
ATOM    331  CE2 TYR A  41     -41.697  17.806   1.707  1.00 26.81           C  
ANISOU  331  CE2 TYR A  41     3832   2725   3631   -306    146    481       C  
ATOM    332  CZ  TYR A  41     -42.103  18.984   1.125  1.00 25.76           C  
ANISOU  332  CZ  TYR A  41     3772   2439   3575   -316     78    646       C  
ATOM    333  OH  TYR A  41     -42.846  19.887   1.854  1.00 30.48           O  
ANISOU  333  OH  TYR A  41     4269   2889   4421   -236     17    645       O  
ATOM    334  N   HIS A  42     -39.629  14.346  -3.807  1.00 25.47           N  
ANISOU  334  N   HIS A  42     4394   3085   2198   -626    339    551       N  
ATOM    335  CA  HIS A  42     -38.660  13.675  -4.665  1.00 31.31           C  
ANISOU  335  CA  HIS A  42     5241   3951   2705   -701    518    460       C  
ATOM    336  C   HIS A  42     -37.752  14.740  -5.280  1.00 32.04           C  
ANISOU  336  C   HIS A  42     5430   4019   2723   -830    723    574       C  
ATOM    337  O   HIS A  42     -38.222  15.654  -5.964  1.00 34.33           O  
ANISOU  337  O   HIS A  42     5895   4232   2917   -884    650    792       O  
ATOM    338  CB  HIS A  42     -39.374  12.885  -5.764  1.00 30.22           C  
ANISOU  338  CB  HIS A  42     5301   3891   2291   -708    375    475       C  
ATOM    339  CG  HIS A  42     -38.448  12.220  -6.741  1.00 32.05           C  
ANISOU  339  CG  HIS A  42     5671   4253   2252   -785    571    366       C  
ATOM    340  CD2 HIS A  42     -37.202  11.708  -6.591  1.00 31.40           C  
ANISOU  340  CD2 HIS A  42     5493   4246   2191   -803    826    181       C  
ATOM    341  ND1 HIS A  42     -38.792  12.005  -8.059  1.00 36.59           N  
ANISOU  341  ND1 HIS A  42     6488   4900   2514   -836    503    421       N  
ATOM    342  CE1 HIS A  42     -37.795  11.397  -8.680  1.00 38.99           C  
ANISOU  342  CE1 HIS A  42     6788   5308   2717   -860    711    263       C  
ATOM    343  NE2 HIS A  42     -36.815  11.213  -7.815  1.00 35.38           N  
ANISOU  343  NE2 HIS A  42     6140   4854   2449   -847    915    121       N  
ATOM    344  N   ASN A  43     -36.454  14.638  -5.009  1.00 31.88           N  
ANISOU  344  N   ASN A  43     5288   4052   2771   -880    975    431       N  
ATOM    345  CA  ASN A  43     -35.512  15.697  -5.369  1.00 32.24           C  
ANISOU  345  CA  ASN A  43     5364   4058   2828  -1023   1205    516       C  
ATOM    346  C   ASN A  43     -36.035  17.117  -5.095  1.00 32.88           C  
ANISOU  346  C   ASN A  43     5476   3951   3064  -1051   1110    731       C  
ATOM    347  O   ASN A  43     -35.904  18.013  -5.928  1.00 38.21           O  
ANISOU  347  O   ASN A  43     6321   4561   3636  -1158   1178    918       O  
ATOM    348  CB  ASN A  43     -35.076  15.552  -6.831  1.00 36.30           C  
ANISOU  348  CB  ASN A  43     6072   4674   3048  -1113   1334    558       C  
ATOM    349  CG  ASN A  43     -34.320  14.262  -7.084  1.00 39.83           C  
ANISOU  349  CG  ASN A  43     6437   5280   3418  -1075   1463    307       C  
ATOM    350  ND2 ASN A  43     -34.531  13.672  -8.253  1.00 41.35           N  
ANISOU  350  ND2 ASN A  43     6801   5564   3346  -1073   1431    304       N  
ATOM    351  OD1 ASN A  43     -33.554  13.801  -6.238  1.00 41.28           O  
ANISOU  351  OD1 ASN A  43     6396   5494   3795  -1037   1573    112       O  
ATOM    352  N   GLY A  44     -36.639  17.311  -3.924  1.00 33.44           N  
ANISOU  352  N   GLY A  44     5377   3931   3397   -935    944    691       N  
ATOM    353  CA  GLY A  44     -37.039  18.640  -3.497  1.00 35.15           C  
ANISOU  353  CA  GLY A  44     5582   3954   3820   -942    874    837       C  
ATOM    354  C   GLY A  44     -38.425  19.074  -3.929  1.00 38.81           C  
ANISOU  354  C   GLY A  44     6199   4311   4239   -873    617   1046       C  
ATOM    355  O   GLY A  44     -38.880  20.160  -3.564  1.00 37.24           O  
ANISOU  355  O   GLY A  44     5985   3927   4239   -848    533   1161       O  
ATOM    356  N   VAL A  45     -39.104  18.228  -4.697  1.00 33.02           N  
ANISOU  356  N   VAL A  45     5599   3684   3265   -833    477   1077       N  
ATOM    357  CA  VAL A  45     -40.417  18.579  -5.231  1.00 34.01           C  
ANISOU  357  CA  VAL A  45     5860   3725   3337   -764    198   1269       C  
ATOM    358  C   VAL A  45     -41.488  17.736  -4.557  1.00 30.89           C  
ANISOU  358  C   VAL A  45     5302   3374   3060   -622    -13   1147       C  
ATOM    359  O   VAL A  45     -41.368  16.513  -4.489  1.00 30.93           O  
ANISOU  359  O   VAL A  45     5260   3525   2967   -609     11    980       O  
ATOM    360  CB  VAL A  45     -40.485  18.342  -6.743  1.00 37.79           C  
ANISOU  360  CB  VAL A  45     6641   4288   3427   -842    158   1414       C  
ATOM    361  CG1 VAL A  45     -41.839  18.774  -7.287  1.00 39.70           C  
ANISOU  361  CG1 VAL A  45     6974   4449   3660   -739   -175   1592       C  
ATOM    362  CG2 VAL A  45     -39.371  19.100  -7.444  1.00 41.80           C  
ANISOU  362  CG2 VAL A  45     7234   4794   3855   -964    409   1485       C  
ATOM    363  N   GLU A  46     -42.535  18.382  -4.056  1.00 31.97           N  
ANISOU  363  N   GLU A  46     5348   3374   3426   -520   -206   1223       N  
ATOM    364  CA  GLU A  46     -43.556  17.651  -3.316  1.00 31.11           C  
ANISOU  364  CA  GLU A  46     5052   3299   3468   -404   -363   1099       C  
ATOM    365  C   GLU A  46     -44.249  16.609  -4.187  1.00 28.58           C  
ANISOU  365  C   GLU A  46     4831   3101   2928   -398   -543   1095       C  
ATOM    366  O   GLU A  46     -44.627  16.884  -5.334  1.00 30.20           O  
ANISOU  366  O   GLU A  46     5238   3298   2937   -419   -700   1260       O  
ATOM    367  CB  GLU A  46     -44.585  18.594  -2.685  1.00 35.54           C  
ANISOU  367  CB  GLU A  46     5481   3691   4333   -293   -518   1167       C  
ATOM    368  CG  GLU A  46     -45.597  17.857  -1.809  1.00 37.37           C  
ANISOU  368  CG  GLU A  46     5489   3964   4744   -194   -618   1021       C  
ATOM    369  CD  GLU A  46     -46.454  18.785  -0.970  1.00 46.44           C  
ANISOU  369  CD  GLU A  46     6461   4956   6228    -83   -692   1027       C  
ATOM    370  OE1 GLU A  46     -46.314  20.017  -1.110  1.00 43.45           O  
ANISOU  370  OE1 GLU A  46     6140   4412   5956    -69   -700   1152       O  
ATOM    371  OE2 GLU A  46     -47.262  18.274  -0.162  1.00 51.00           O1-
ANISOU  371  OE2 GLU A  46     6841   5566   6970    -15   -725    901       O1-
ATOM    372  N   LEU A  47     -44.383  15.405  -3.639  1.00 28.88           N  
ANISOU  372  N   LEU A  47     4741   3243   2989   -375   -525    907       N  
ATOM    373  CA  LEU A  47     -45.071  14.311  -4.308  1.00 31.27           C  
ANISOU  373  CA  LEU A  47     5102   3645   3135   -376   -693    857       C  
ATOM    374  C   LEU A  47     -46.561  14.333  -3.989  1.00 31.22           C  
ANISOU  374  C   LEU A  47     4938   3578   3346   -289   -946    876       C  
ATOM    375  O   LEU A  47     -46.962  14.591  -2.854  1.00 37.60           O  
ANISOU  375  O   LEU A  47     5532   4317   4438   -224   -909    822       O  
ATOM    376  CB  LEU A  47     -44.484  12.959  -3.886  1.00 29.08           C  
ANISOU  376  CB  LEU A  47     4769   3476   2805   -400   -548    644       C  
ATOM    377  CG  LEU A  47     -43.085  12.586  -4.381  1.00 29.69           C  
ANISOU  377  CG  LEU A  47     4979   3644   2659   -477   -320    572       C  
ATOM    378  CD1 LEU A  47     -43.082  12.384  -5.900  1.00 30.32           C  
ANISOU  378  CD1 LEU A  47     5319   3804   2399   -548   -390    634       C  
ATOM    379  CD2 LEU A  47     -42.611  11.324  -3.673  1.00 30.34           C  
ANISOU  379  CD2 LEU A  47     4952   3784   2791   -454   -207    361       C  
ATOM    380  N   GLN A  48     -47.369  14.070  -5.011  1.00 36.45           N  
ANISOU  380  N   GLN A  48     5706   4275   3869   -290  -1200    941       N  
ATOM    381  CA  GLN A  48     -48.796  13.873  -4.833  1.00 38.12           C  
ANISOU  381  CA  GLN A  48     5739   4454   4291   -220  -1457    923       C  
ATOM    382  C   GLN A  48     -49.107  12.411  -5.112  1.00 37.47           C  
ANISOU  382  C   GLN A  48     5652   4484   4101   -277  -1525    761       C  
ATOM    383  O   GLN A  48     -48.412  11.764  -5.898  1.00 39.21           O  
ANISOU  383  O   GLN A  48     6081   4800   4019   -352  -1472    714       O  
ATOM    384  CB  GLN A  48     -49.581  14.755  -5.808  1.00 49.72           C  
ANISOU  384  CB  GLN A  48     7313   5859   5721   -167  -1762   1123       C  
ATOM    385  CG  GLN A  48     -49.648  16.220  -5.409  1.00 62.60           C  
ANISOU  385  CG  GLN A  48     8893   7321   7573    -82  -1756   1280       C  
ATOM    386  CD  GLN A  48     -50.507  16.443  -4.179  1.00 76.32           C  
ANISOU  386  CD  GLN A  48    10293   8971   9733     20  -1759   1184       C  
ATOM    387  NE2 GLN A  48     -51.791  16.710  -4.395  1.00 82.75           N  
ANISOU  387  NE2 GLN A  48    10966   9727  10749    118  -2053   1230       N  
ATOM    388  OE1 GLN A  48     -50.024  16.374  -3.048  1.00 81.33           O  
ANISOU  388  OE1 GLN A  48    10794   9598  10510     12  -1501   1061       O  
ATOM    389  N   GLU A  49     -50.149  11.886  -4.478  1.00 34.87           N  
ANISOU  389  N   GLU A  49     5084   4136   4028   -248  -1626    664       N  
ATOM    390  CA  GLU A  49     -50.585  10.527  -4.784  1.00 35.80           C  
ANISOU  390  CA  GLU A  49     5191   4328   4085   -315  -1721    514       C  
ATOM    391  C   GLU A  49     -51.077  10.409  -6.227  1.00 37.76           C  
ANISOU  391  C   GLU A  49     5617   4634   4095   -342  -2030    562       C  
ATOM    392  O   GLU A  49     -51.693  11.332  -6.771  1.00 41.24           O  
ANISOU  392  O   GLU A  49     6076   5036   4555   -279  -2268    716       O  
ATOM    393  CB  GLU A  49     -51.663  10.061  -3.810  1.00 35.08           C  
ANISOU  393  CB  GLU A  49     4795   4192   4344   -303  -1751    413       C  
ATOM    394  CG  GLU A  49     -51.155   9.969  -2.379  1.00 39.57           C  
ANISOU  394  CG  GLU A  49     5236   4723   5077   -292  -1443    348       C  
ATOM    395  CD  GLU A  49     -51.965   9.009  -1.533  1.00 51.94           C  
ANISOU  395  CD  GLU A  49     6590   6272   6874   -336  -1403    220       C  
ATOM    396  OE1 GLU A  49     -53.104   9.358  -1.157  1.00 57.99           O  
ANISOU  396  OE1 GLU A  49     7120   6997   7917   -305  -1499    223       O  
ATOM    397  OE2 GLU A  49     -51.462   7.901  -1.250  1.00 40.00           O1-
ANISOU  397  OE2 GLU A  49     5144   4777   5278   -403  -1269    118       O1-
ATOM    398  N   SER A  50     -50.783   9.268  -6.842  1.00 36.13           N  
ANISOU  398  N   SER A  50     5556   4514   3659   -428  -2035    425       N  
ATOM    399  CA  SER A  50     -51.143   9.019  -8.229  1.00 41.61           C  
ANISOU  399  CA  SER A  50     6449   5284   4077   -465  -2295    427       C  
ATOM    400  C   SER A  50     -51.147   7.515  -8.446  1.00 37.32           C  
ANISOU  400  C   SER A  50     5923   4792   3463   -550  -2270    194       C  
ATOM    401  O   SER A  50     -51.050   6.757  -7.489  1.00 42.33           O  
ANISOU  401  O   SER A  50     6417   5383   4286   -582  -2131     69       O  
ATOM    402  CB  SER A  50     -50.136   9.681  -9.169  1.00 44.86           C  
ANISOU  402  CB  SER A  50     7153   5749   4143   -470  -2157    547       C  
ATOM    403  OG  SER A  50     -48.849   9.107  -9.016  1.00 44.22           O  
ANISOU  403  OG  SER A  50     7204   5719   3880   -533  -1860    443       O  
ATOM    404  N   SER A  51     -51.266   7.072  -9.695  1.00 44.71           N  
ANISOU  404  N   SER A  51     7017   5811   4160   -577  -2360    132       N  
ATOM    405  CA  SER A  51     -51.189   5.643  -9.964  1.00 43.89           C  
ANISOU  405  CA  SER A  51     6943   5741   3991   -651  -2318   -100       C  
ATOM    406  C   SER A  51     -49.777   5.132  -9.680  1.00 43.35           C  
ANISOU  406  C   SER A  51     7013   5686   3772   -678  -1994   -193       C  
ATOM    407  O   SER A  51     -49.572   3.944  -9.430  1.00 56.94           O  
ANISOU  407  O   SER A  51     8711   7380   5543   -721  -1902   -385       O  
ATOM    408  CB  SER A  51     -51.604   5.334 -11.402  1.00 51.67           C  
ANISOU  408  CB  SER A  51     8068   6824   4739   -667  -2492   -155       C  
ATOM    409  OG  SER A  51     -50.797   6.045 -12.320  1.00 56.95           O  
ANISOU  409  OG  SER A  51     8990   7575   5073   -646  -2399    -38       O  
ATOM    410  N   LYS A  52     -48.808   6.042  -9.695  1.00 44.28           N  
ANISOU  410  N   LYS A  52     7255   5830   3739   -649  -1813    -58       N  
ATOM    411  CA  LYS A  52     -47.415   5.670  -9.466  1.00 38.43           C  
ANISOU  411  CA  LYS A  52     6612   5112   2878   -662  -1490   -148       C  
ATOM    412  C   LYS A  52     -46.990   5.773  -8.003  1.00 32.72           C  
ANISOU  412  C   LYS A  52     5735   4304   2393   -638  -1324   -140       C  
ATOM    413  O   LYS A  52     -46.192   4.960  -7.526  1.00 36.00           O  
ANISOU  413  O   LYS A  52     6130   4701   2848   -634  -1110   -285       O  
ATOM    414  CB  LYS A  52     -46.498   6.532 -10.329  1.00 56.24           C  
ANISOU  414  CB  LYS A  52     9058   7449   4862   -660  -1332    -30       C  
ATOM    415  CG  LYS A  52     -45.070   6.035 -10.387  1.00 61.89           C  
ANISOU  415  CG  LYS A  52     9844   8214   5456   -672   -998   -162       C  
ATOM    416  CD  LYS A  52     -44.301   6.763 -11.469  1.00 63.75           C  
ANISOU  416  CD  LYS A  52    10259   8543   5421   -694   -855    -67       C  
ATOM    417  CE  LYS A  52     -42.915   6.178 -11.640  1.00 56.69           C  
ANISOU  417  CE  LYS A  52     9391   7710   4439   -701   -530   -231       C  
ATOM    418  NZ  LYS A  52     -42.947   4.806 -12.197  1.00 48.60           N1+
ANISOU  418  NZ  LYS A  52     8391   6730   3346   -693   -548   -471       N1+
ATOM    419  N   ILE A  53     -47.538   6.760  -7.300  1.00 31.81           N  
ANISOU  419  N   ILE A  53     5449   4128   2510   -586  -1379     26       N  
ATOM    420  CA  ILE A  53     -47.092   7.098  -5.949  1.00 27.88           C  
ANISOU  420  CA  ILE A  53     4761   3560   2271   -531  -1160     54       C  
ATOM    421  C   ILE A  53     -48.212   6.946  -4.915  1.00 29.81           C  
ANISOU  421  C   ILE A  53     4745   3720   2861   -506  -1254     49       C  
ATOM    422  O   ILE A  53     -49.280   7.529  -5.075  1.00 28.75           O  
ANISOU  422  O   ILE A  53     4516   3564   2845   -488  -1469    139       O  
ATOM    423  CB  ILE A  53     -46.619   8.563  -5.906  1.00 36.82           C  
ANISOU  423  CB  ILE A  53     5921   4682   3385   -495  -1078    241       C  
ATOM    424  CG1 ILE A  53     -45.426   8.779  -6.841  1.00 47.46           C  
ANISOU  424  CG1 ILE A  53     7512   6112   4408   -543   -919    256       C  
ATOM    425  CG2 ILE A  53     -46.300   8.988  -4.486  1.00 34.82           C  
ANISOU  425  CG2 ILE A  53     5466   4357   3407   -439   -895    253       C  
ATOM    426  CD1 ILE A  53     -44.176   8.038  -6.433  1.00 41.03           C  
ANISOU  426  CD1 ILE A  53     6688   5330   3572   -549   -636     92       C  
ATOM    427  N   HIS A  54     -47.962   6.171  -3.861  1.00 29.04           N  
ANISOU  427  N   HIS A  54     4534   3573   2927   -503  -1089    -53       N  
ATOM    428  CA  HIS A  54     -48.900   6.061  -2.739  1.00 25.24           C  
ANISOU  428  CA  HIS A  54     3817   3015   2757   -494  -1101    -51       C  
ATOM    429  C   HIS A  54     -48.141   6.231  -1.432  1.00 22.54           C  
ANISOU  429  C   HIS A  54     3402   2639   2523   -444   -850    -44       C  
ATOM    430  O   HIS A  54     -47.039   5.714  -1.287  1.00 24.09           O  
ANISOU  430  O   HIS A  54     3699   2847   2609   -433   -696   -112       O  
ATOM    431  CB  HIS A  54     -49.561   4.680  -2.699  1.00 28.48           C  
ANISOU  431  CB  HIS A  54     4184   3383   3256   -571  -1173   -188       C  
ATOM    432  CG  HIS A  54     -50.300   4.320  -3.946  1.00 37.69           C  
ANISOU  432  CG  HIS A  54     5420   4585   4317   -634  -1441   -242       C  
ATOM    433  CD2 HIS A  54     -51.102   5.052  -4.752  1.00 44.22           C  
ANISOU  433  CD2 HIS A  54     6232   5455   5116   -626  -1697   -163       C  
ATOM    434  ND1 HIS A  54     -50.269   3.051  -4.483  1.00 46.83           N  
ANISOU  434  ND1 HIS A  54     6682   5726   5383   -710  -1492   -404       N  
ATOM    435  CE1 HIS A  54     -51.010   3.021  -5.578  1.00 45.67           C  
ANISOU  435  CE1 HIS A  54     6586   5627   5138   -758  -1768   -437       C  
ATOM    436  NE2 HIS A  54     -51.527   4.223  -5.763  1.00 45.76           N  
ANISOU  436  NE2 HIS A  54     6527   5679   5180   -703  -1908   -283       N  
ATOM    437  N   TYR A  55     -48.741   6.920  -0.471  1.00 21.87           N  
ANISOU  437  N   TYR A  55     3137   2512   2659   -407   -818     19       N  
ATOM    438  CA  TYR A  55     -48.136   6.973   0.856  1.00 23.38           C  
ANISOU  438  CA  TYR A  55     3270   2677   2936   -367   -602      6       C  
ATOM    439  C   TYR A  55     -49.168   6.882   1.966  1.00 25.87           C  
ANISOU  439  C   TYR A  55     3395   2941   3494   -377   -563      1       C  
ATOM    440  O   TYR A  55     -50.313   7.301   1.809  1.00 27.17           O  
ANISOU  440  O   TYR A  55     3414   3091   3820   -385   -683     29       O  
ATOM    441  CB  TYR A  55     -47.231   8.202   1.042  1.00 22.43           C  
ANISOU  441  CB  TYR A  55     3180   2575   2767   -304   -501     74       C  
ATOM    442  CG  TYR A  55     -47.764   9.508   0.482  1.00 29.44           C  
ANISOU  442  CG  TYR A  55     4035   3448   3703   -276   -622    189       C  
ATOM    443  CD1 TYR A  55     -48.690  10.273   1.184  1.00 36.84           C  
ANISOU  443  CD1 TYR A  55     4793   4329   4876   -231   -648    227       C  
ATOM    444  CD2 TYR A  55     -47.312   9.990  -0.736  1.00 30.19           C  
ANISOU  444  CD2 TYR A  55     4290   3574   3605   -291   -700    262       C  
ATOM    445  CE1 TYR A  55     -49.161  11.473   0.672  1.00 41.63           C  
ANISOU  445  CE1 TYR A  55     5372   4890   5555   -183   -777    335       C  
ATOM    446  CE2 TYR A  55     -47.780  11.182  -1.258  1.00 37.18           C  
ANISOU  446  CE2 TYR A  55     5179   4419   4528   -259   -829    397       C  
ATOM    447  CZ  TYR A  55     -48.700  11.919  -0.550  1.00 44.23           C  
ANISOU  447  CZ  TYR A  55     5884   5235   5687   -196   -880    434       C  
ATOM    448  OH  TYR A  55     -49.153  13.106  -1.080  1.00 49.94           O  
ANISOU  448  OH  TYR A  55     6613   5889   6473   -143  -1026    572       O  
ATOM    449  N   THR A  56     -48.746   6.331   3.100  1.00 22.53           N  
ANISOU  449  N   THR A  56     2971   2492   3095   -374   -390    -37       N  
ATOM    450  CA  THR A  56     -49.655   6.105   4.209  1.00 24.52           C  
ANISOU  450  CA  THR A  56     3077   2703   3535   -406   -302    -44       C  
ATOM    451  C   THR A  56     -48.980   6.409   5.536  1.00 23.23           C  
ANISOU  451  C   THR A  56     2932   2543   3351   -352   -109    -39       C  
ATOM    452  O   THR A  56     -47.752   6.446   5.616  1.00 19.08           O  
ANISOU  452  O   THR A  56     2530   2040   2679   -299    -62    -48       O  
ATOM    453  CB  THR A  56     -50.125   4.643   4.264  1.00 25.18           C  
ANISOU  453  CB  THR A  56     3181   2727   3658   -505   -304    -95       C  
ATOM    454  CG2 THR A  56     -50.925   4.277   3.017  1.00 33.49           C  
ANISOU  454  CG2 THR A  56     4200   3778   4749   -574   -518   -131       C  
ATOM    455  OG1 THR A  56     -48.986   3.779   4.375  1.00 26.13           O  
ANISOU  455  OG1 THR A  56     3486   2823   3618   -487   -238   -126       O  
ATOM    456  N   ASN A  57     -49.797   6.638   6.566  1.00 23.84           N  
ANISOU  456  N   ASN A  57     2877   2605   3577   -367      0    -38       N  
ATOM    457  CA  ASN A  57     -49.331   6.802   7.941  1.00 23.23           C  
ANISOU  457  CA  ASN A  57     2834   2537   3455   -331    182    -46       C  
ATOM    458  C   ASN A  57     -50.210   5.923   8.807  1.00 24.63           C  
ANISOU  458  C   ASN A  57     2968   2676   3716   -422    307    -47       C  
ATOM    459  O   ASN A  57     -51.404   6.174   8.943  1.00 28.53           O  
ANISOU  459  O   ASN A  57     3279   3163   4400   -471    343    -61       O  
ATOM    460  CB  ASN A  57     -49.435   8.265   8.405  1.00 24.16           C  
ANISOU  460  CB  ASN A  57     2845   2680   3653   -258    234    -57       C  
ATOM    461  CG  ASN A  57     -48.938   8.466   9.834  1.00 28.04           C  
ANISOU  461  CG  ASN A  57     3391   3195   4067   -224    408    -91       C  
ATOM    462  ND2 ASN A  57     -48.758   9.726  10.229  1.00 24.35           N  
ANISOU  462  ND2 ASN A  57     2867   2741   3644   -156    448   -130       N  
ATOM    463  OD1 ASN A  57     -48.700   7.506  10.561  1.00 26.77           O  
ANISOU  463  OD1 ASN A  57     3339   3032   3801   -258    491    -83       O  
ATOM    464  N   THR A  58     -49.629   4.869   9.362  1.00 24.81           N  
ANISOU  464  N   THR A  58     3153   2662   3611   -446    374    -28       N  
ATOM    465  CA  THR A  58     -50.378   3.959  10.211  1.00 28.64           C  
ANISOU  465  CA  THR A  58     3644   3089   4150   -551    515     -1       C  
ATOM    466  C   THR A  58     -49.801   4.046  11.616  1.00 29.14           C  
ANISOU  466  C   THR A  58     3836   3176   4059   -508    676     28       C  
ATOM    467  O   THR A  58     -48.816   3.381  11.943  1.00 25.61           O  
ANISOU  467  O   THR A  58     3585   2698   3447   -464    655     63       O  
ATOM    468  CB  THR A  58     -50.301   2.513   9.680  1.00 30.03           C  
ANISOU  468  CB  THR A  58     3937   3162   4311   -630    443     16       C  
ATOM    469  CG2 THR A  58     -51.217   1.596  10.483  1.00 36.53           C  
ANISOU  469  CG2 THR A  58     4754   3898   5227   -773    600     59       C  
ATOM    470  OG1 THR A  58     -50.703   2.487   8.308  1.00 35.65           O  
ANISOU  470  OG1 THR A  58     4558   3871   5118   -660    263    -33       O  
ATOM    471  N   SER A  59     -50.400   4.900  12.441  1.00 28.42           N  
ANISOU  471  N   SER A  59     3948   3035   3817    -14   -130    311       N  
ATOM    472  CA  SER A  59     -49.937   5.094  13.815  1.00 31.39           C  
ANISOU  472  CA  SER A  59     4301   3406   4219    129    -58    274       C  
ATOM    473  C   SER A  59     -48.455   5.473  13.917  1.00 27.72           C  
ANISOU  473  C   SER A  59     3907   2876   3749    211    -17    135       C  
ATOM    474  O   SER A  59     -47.783   5.134  14.897  1.00 33.20           O  
ANISOU  474  O   SER A  59     4625   3549   4440    303     23     71       O  
ATOM    475  CB  SER A  59     -50.214   3.844  14.658  1.00 38.12           C  
ANISOU  475  CB  SER A  59     5171   4250   5065    114    -37    310       C  
ATOM    476  OG  SER A  59     -51.578   3.468  14.578  1.00 51.09           O  
ANISOU  476  OG  SER A  59     6731   5948   6731     24    -68    437       O  
ATOM    477  N   GLY A  60     -47.949   6.192  12.921  1.00 21.40           N  
ANISOU  477  N   GLY A  60     3133   2050   2948    182    -26     94       N  
ATOM    478  CA  GLY A  60     -46.560   6.620  12.941  1.00 22.62           C  
ANISOU  478  CA  GLY A  60     3332   2144   3118    245     20    -35       C  
ATOM    479  C   GLY A  60     -45.638   5.815  12.033  1.00 16.09           C  
ANISOU  479  C   GLY A  60     2570   1298   2244    154     21   -115       C  
ATOM    480  O   GLY A  60     -44.504   6.215  11.788  1.00 19.12           O  
ANISOU  480  O   GLY A  60     2891   1724   2649    161     48   -196       O  
ATOM    481  N   VAL A  61     -46.119   4.680  11.544  1.00 17.99           N  
ANISOU  481  N   VAL A  61     2908   1494   2434     61    -18    -88       N  
ATOM    482  CA  VAL A  61     -45.355   3.961  10.522  1.00 17.51           C  
ANISOU  482  CA  VAL A  61     2889   1440   2322    -19    -15   -164       C  
ATOM    483  C   VAL A  61     -45.690   4.607   9.180  1.00 17.14           C  
ANISOU  483  C   VAL A  61     2920   1373   2222   -110    -43   -130       C  
ATOM    484  O   VAL A  61     -46.847   4.573   8.762  1.00 18.17           O  
ANISOU  484  O   VAL A  61     3020   1559   2324   -184   -111    -27       O  
ATOM    485  CB  VAL A  61     -45.710   2.474  10.479  1.00 18.15           C  
ANISOU  485  CB  VAL A  61     3027   1492   2377    -91    -47   -165       C  
ATOM    486  CG1 VAL A  61     -44.907   1.773   9.380  1.00 20.43           C  
ANISOU  486  CG1 VAL A  61     3345   1798   2619   -145    -40   -249       C  
ATOM    487  CG2 VAL A  61     -45.440   1.809  11.830  1.00 22.76           C  
ANISOU  487  CG2 VAL A  61     3563   2080   3007     -4    -20   -170       C  
ATOM    488  N   LEU A  62     -44.688   5.204   8.530  1.00 16.68           N  
ANISOU  488  N   LEU A  62     2853   1335   2152    -94      9   -190       N  
ATOM    489  CA  LEU A  62     -44.885   5.968   7.298  1.00 16.88           C  
ANISOU  489  CA  LEU A  62     2940   1358   2116   -165      0   -140       C  
ATOM    490  C   LEU A  62     -44.325   5.144   6.157  1.00 20.01           C  
ANISOU  490  C   LEU A  62     3452   1745   2406   -256      8   -222       C  
ATOM    491  O   LEU A  62     -43.190   4.692   6.248  1.00 19.60           O  
ANISOU  491  O   LEU A  62     3334   1734   2379   -201     66   -307       O  
ATOM    492  CB  LEU A  62     -44.118   7.285   7.362  1.00 17.04           C  
ANISOU  492  CB  LEU A  62     2920   1352   2202    -93     75   -151       C  
ATOM    493  CG  LEU A  62     -44.348   8.091   8.640  1.00 19.07           C  
ANISOU  493  CG  LEU A  62     3058   1611   2576     21     82   -126       C  
ATOM    494  CD1 LEU A  62     -43.593   9.404   8.495  1.00 20.98           C  
ANISOU  494  CD1 LEU A  62     3233   1847   2890     64    135   -138       C  
ATOM    495  CD2 LEU A  62     -45.831   8.319   8.850  1.00 19.66           C  
ANISOU  495  CD2 LEU A  62     3079   1737   2653     17     10     12       C  
ATOM    496  N   THR A  63     -45.102   4.953   5.090  1.00 18.53           N  
ANISOU  496  N   THR A  63     3306   1620   2114   -358    -62   -160       N  
ATOM    497  CA  THR A  63     -44.626   4.172   3.941  1.00 17.93           C  
ANISOU  497  CA  THR A  63     3349   1549   1916   -444    -59   -252       C  
ATOM    498  C   THR A  63     -44.867   4.977   2.678  1.00 22.21           C  
ANISOU  498  C   THR A  63     3924   2175   2342   -496    -73   -170       C  
ATOM    499  O   THR A  63     -45.954   5.540   2.499  1.00 23.01           O  
ANISOU  499  O   THR A  63     3970   2343   2428   -516   -156    -35       O  
ATOM    500  CB  THR A  63     -45.358   2.811   3.824  1.00 20.21           C  
ANISOU  500  CB  THR A  63     3681   1831   2166   -534   -150   -287       C  
ATOM    501  CG2 THR A  63     -44.781   1.955   2.687  1.00 25.17           C  
ANISOU  501  CG2 THR A  63     4377   2494   2692   -579   -131   -386       C  
ATOM    502  OG1 THR A  63     -45.239   2.091   5.068  1.00 23.36           O  
ANISOU  502  OG1 THR A  63     3987   2200   2687   -451   -126   -302       O  
ATOM    503  N   LEU A  64     -43.841   5.050   1.830  1.00 19.85           N  
ANISOU  503  N   LEU A  64     3706   1874   1960   -510     13   -246       N  
ATOM    504  CA  LEU A  64     -43.978   5.599   0.481  1.00 17.38           C  
ANISOU  504  CA  LEU A  64     3457   1650   1495   -568      7   -176       C  
ATOM    505  C   LEU A  64     -43.802   4.438  -0.467  1.00 20.73           C  
ANISOU  505  C   LEU A  64     4004   2108   1765   -652    -15   -299       C  
ATOM    506  O   LEU A  64     -42.836   3.695  -0.361  1.00 24.38           O  
ANISOU  506  O   LEU A  64     4516   2507   2242   -638     63   -452       O  
ATOM    507  CB  LEU A  64     -42.901   6.647   0.193  1.00 18.90           C  
ANISOU  507  CB  LEU A  64     3653   1822   1708   -521    147   -160       C  
ATOM    508  CG  LEU A  64     -42.842   7.131  -1.274  1.00 21.53           C  
ANISOU  508  CG  LEU A  64     4074   2248   1857   -577    172    -86       C  
ATOM    509  CD1 LEU A  64     -44.115   7.883  -1.612  1.00 25.94           C  
ANISOU  509  CD1 LEU A  64     4601   2885   2372   -590     55    106       C  
ATOM    510  CD2 LEU A  64     -41.615   8.024  -1.517  1.00 22.41           C  
ANISOU  510  CD2 LEU A  64     4186   2319   2008   -543    341    -83       C  
ATOM    511  N   GLU A  65     -44.726   4.294  -1.398  1.00 22.50           N  
ANISOU  511  N   GLU A  65     4273   2434   1842   -732   -127   -241       N  
ATOM    512  CA  GLU A  65     -44.621   3.219  -2.358  1.00 22.21           C  
ANISOU  512  CA  GLU A  65     4358   2435   1645   -815   -161   -375       C  
ATOM    513  C   GLU A  65     -44.526   3.835  -3.749  1.00 26.95           C  
ANISOU  513  C   GLU A  65     5044   3162   2034   -847   -146   -317       C  
ATOM    514  O   GLU A  65     -45.320   4.706  -4.093  1.00 26.27           O  
ANISOU  514  O   GLU A  65     4922   3162   1899   -850   -220   -148       O  
ATOM    515  CB  GLU A  65     -45.836   2.317  -2.237  1.00 22.63           C  
ANISOU  515  CB  GLU A  65     4393   2504   1702   -895   -325   -385       C  
ATOM    516  CG  GLU A  65     -45.886   1.205  -3.263  1.00 29.83           C  
ANISOU  516  CG  GLU A  65     5341   3464   2531   -942   -361   -492       C  
ATOM    517  CD  GLU A  65     -47.107   0.340  -3.057  1.00 41.56           C  
ANISOU  517  CD  GLU A  65     6769   4949   4071  -1014   -508   -492       C  
ATOM    518  OE1 GLU A  65     -48.227   0.820  -3.335  1.00 43.97           O  
ANISOU  518  OE1 GLU A  65     7057   5346   4301  -1083   -649   -389       O  
ATOM    519  OE2 GLU A  65     -46.948  -0.799  -2.578  1.00 40.70           O1-
ANISOU  519  OE2 GLU A  65     6616   4753   4093   -994   -484   -581       O1-
ATOM    520  N   ILE A  66     -43.520   3.416  -4.505  1.00 26.24           N  
ANISOU  520  N   ILE A  66     5037   3083   1851   -848    -40   -439       N  
ATOM    521  CA  ILE A  66     -43.342   3.878  -5.885  1.00 25.36           C  
ANISOU  521  CA  ILE A  66     5007   3101   1529   -869     -7   -391       C  
ATOM    522  C   ILE A  66     -43.466   2.660  -6.780  1.00 30.24           C  
ANISOU  522  C   ILE A  66     5642   3775   2074   -898    -67   -522       C  
ATOM    523  O   ILE A  66     -42.742   1.678  -6.596  1.00 29.77           O  
ANISOU  523  O   ILE A  66     5551   3643   2119   -861     -6   -668       O  
ATOM    524  CB  ILE A  66     -41.956   4.524  -6.085  1.00 27.59           C  
ANISOU  524  CB  ILE A  66     5315   3359   1811   -818    200   -404       C  
ATOM    525  CG1 ILE A  66     -41.727   5.642  -5.061  1.00 31.36           C  
ANISOU  525  CG1 ILE A  66     5704   3746   2466   -759    272   -288       C  
ATOM    526  CG2 ILE A  66     -41.805   5.049  -7.525  1.00 28.92           C  
ANISOU  526  CG2 ILE A  66     5559   3668   1761   -835    244   -326       C  
ATOM    527  CD1 ILE A  66     -40.363   5.593  -4.408  1.00 40.94           C  
ANISOU  527  CD1 ILE A  66     6875   4848   3832   -701    440   -410       C  
ATOM    528  N   LEU A  67     -44.393   2.709  -7.735  1.00 31.20           N  
ANISOU  528  N   LEU A  67     5800   4030   2025   -948   -194   -465       N  
ATOM    529  CA  LEU A  67     -44.675   1.564  -8.581  1.00 31.07           C  
ANISOU  529  CA  LEU A  67     5803   4072   1932   -977   -272   -599       C  
ATOM    530  C   LEU A  67     -43.944   1.693  -9.909  1.00 32.09           C  
ANISOU  530  C   LEU A  67     6015   4316   1862   -952   -183   -639       C  
ATOM    531  O   LEU A  67     -43.716   2.804 -10.380  1.00 33.55           O  
ANISOU  531  O   LEU A  67     6240   4580   1927   -934   -118   -503       O  
ATOM    532  CB  LEU A  67     -46.173   1.472  -8.860  1.00 37.33           C  
ANISOU  532  CB  LEU A  67     6569   4953   2661  -1043   -478   -534       C  
ATOM    533  CG  LEU A  67     -47.113   1.307  -7.669  1.00 44.73           C  
ANISOU  533  CG  LEU A  67     7413   5805   3776  -1081   -588   -483       C  
ATOM    534  CD1 LEU A  67     -48.517   1.029  -8.188  1.00 49.75           C  
ANISOU  534  CD1 LEU A  67     8008   6548   4348  -1150   -789   -451       C  
ATOM    535  CD2 LEU A  67     -46.635   0.178  -6.782  1.00 44.40           C  
ANISOU  535  CD2 LEU A  67     7330   5607   3934  -1065   -528   -624       C  
ATOM    536  N   ASP A  68     -43.586   0.553 -10.499  1.00 39.23           N  
ANISOU  536  N   ASP A  68     6940   5229   2737   -943   -178   -816       N  
ATOM    537  CA  ASP A  68     -43.035   0.494 -11.848  1.00 48.47           C  
ANISOU  537  CA  ASP A  68     8190   6530   3695   -918   -118   -877       C  
ATOM    538  C   ASP A  68     -41.849   1.436 -12.064  1.00 42.64           C  
ANISOU  538  C   ASP A  68     7483   5810   2907   -868     80   -806       C  
ATOM    539  O   ASP A  68     -41.856   2.264 -12.970  1.00 36.51           O  
ANISOU  539  O   ASP A  68     6767   5171   1936   -862    112   -693       O  
ATOM    540  CB  ASP A  68     -44.128   0.797 -12.854  1.00 37.23           C  
ANISOU  540  CB  ASP A  68     6811   5279   2054   -954   -269   -801       C  
ATOM    541  CG  ASP A  68     -43.647   0.656 -14.281  1.00 39.95           C  
ANISOU  541  CG  ASP A  68     7246   5779   2156   -918   -220   -872       C  
ATOM    542  OD1 ASP A  68     -42.767  -0.197 -14.480  1.00 49.84           O  
ANISOU  542  OD1 ASP A  68     8514   6989   3434   -883   -130  -1047       O  
ATOM    543  OD2 ASP A  68     -44.123   1.435 -15.119  1.00 41.53           O1-
ANISOU  543  OD2 ASP A  68     7490   6137   2155   -912   -269   -740       O1-
ATOM    544  N   CYS A  69     -40.824   1.256 -11.242  1.00 34.12           N  
ANISOU  544  N   CYS A  69     6352   4597   2016   -827    212   -871       N  
ATOM    545  CA  CYS A  69     -39.679   2.160 -11.179  1.00 39.17           C  
ANISOU  545  CA  CYS A  69     6989   5219   2673   -789    405   -809       C  
ATOM    546  C   CYS A  69     -38.834   2.243 -12.437  1.00 41.67           C  
ANISOU  546  C   CYS A  69     7369   5660   2804   -760    531   -845       C  
ATOM    547  O   CYS A  69     -38.378   1.229 -12.954  1.00 38.53           O  
ANISOU  547  O   CYS A  69     6981   5284   2372   -729    543  -1011       O  
ATOM    548  CB  CYS A  69     -38.777   1.764 -10.015  1.00 31.06           C  
ANISOU  548  CB  CYS A  69     5868   4029   1906   -741    492   -896       C  
ATOM    549  SG  CYS A  69     -39.480   2.157  -8.399  1.00 33.46           S  
ANISOU  549  SG  CYS A  69     6094   4194   2425   -753    412   -804       S  
ATOM    550  N   HIS A  70     -38.607   3.468 -12.904  1.00 35.97           N  
ANISOU  550  N   HIS A  70     6683   5015   1969   -763    632   -680       N  
ATOM    551  CA  HIS A  70     -37.722   3.709 -14.038  1.00 38.21           C  
ANISOU  551  CA  HIS A  70     7017   5420   2083   -732    783   -681       C  
ATOM    552  C   HIS A  70     -36.565   4.598 -13.604  1.00 37.41           C  
ANISOU  552  C   HIS A  70     6863   5241   2110   -715    995   -610       C  
ATOM    553  O   HIS A  70     -36.491   5.006 -12.436  1.00 35.86           O  
ANISOU  553  O   HIS A  70     6599   4901   2125   -722   1011   -573       O  
ATOM    554  CB  HIS A  70     -38.484   4.368 -15.189  1.00 44.97           C  
ANISOU  554  CB  HIS A  70     7954   6461   2671   -741    721   -523       C  
ATOM    555  CG  HIS A  70     -39.643   3.564 -15.692  1.00 44.89           C  
ANISOU  555  CG  HIS A  70     7986   6542   2529   -758    506   -596       C  
ATOM    556  CD2 HIS A  70     -39.821   2.226 -15.805  1.00 42.07           C  
ANISOU  556  CD2 HIS A  70     7632   6172   2180   -758    410   -811       C  
ATOM    557  ND1 HIS A  70     -40.801   4.145 -16.161  1.00 52.12           N  
ANISOU  557  ND1 HIS A  70     8932   7574   3299   -773    360   -437       N  
ATOM    558  CE1 HIS A  70     -41.644   3.202 -16.537  1.00 58.96           C  
ANISOU  558  CE1 HIS A  70     9817   8500   4084   -790    182   -562       C  
ATOM    559  NE2 HIS A  70     -41.072   2.029 -16.336  1.00 50.06           N  
ANISOU  559  NE2 HIS A  70     8679   7292   3051   -785    213   -790       N  
ATOM    560  N   THR A  71     -35.664   4.899 -14.536  1.00 42.93           N  
ANISOU  560  N   THR A  71     7589   6039   2685   -691   1158   -595       N  
ATOM    561  CA  THR A  71     -34.492   5.706 -14.217  1.00 45.63           C  
ANISOU  561  CA  THR A  71     7865   6312   3160   -682   1371   -538       C  
ATOM    562  C   THR A  71     -34.881   7.062 -13.634  1.00 46.83           C  
ANISOU  562  C   THR A  71     7992   6396   3404   -713   1389   -315       C  
ATOM    563  O   THR A  71     -34.227   7.563 -12.713  1.00 45.99           O  
ANISOU  563  O   THR A  71     7802   6151   3522   -714   1495   -308       O  
ATOM    564  CB  THR A  71     -33.594   5.904 -15.445  1.00 50.80           C  
ANISOU  564  CB  THR A  71     8553   7110   3641   -659   1543   -522       C  
ATOM    565  CG2 THR A  71     -32.361   6.714 -15.077  1.00 53.85           C  
ANISOU  565  CG2 THR A  71     8848   7414   4199   -660   1763   -469       C  
ATOM    566  OG1 THR A  71     -33.189   4.624 -15.946  1.00 55.80           O  
ANISOU  566  OG1 THR A  71     9203   7797   4201   -616   1529   -741       O  
ATOM    567  N   ASP A  72     -35.959   7.637 -14.156  1.00 43.51           N  
ANISOU  567  N   ASP A  72     7634   6072   2825   -728   1275   -137       N  
ATOM    568  CA  ASP A  72     -36.435   8.949 -13.715  1.00 46.23           C  
ANISOU  568  CA  ASP A  72     7950   6358   3256   -740   1272    101       C  
ATOM    569  C   ASP A  72     -36.868   8.971 -12.251  1.00 41.76           C  
ANISOU  569  C   ASP A  72     7323   5622   2924   -751   1188     73       C  
ATOM    570  O   ASP A  72     -37.012  10.036 -11.655  1.00 39.13           O  
ANISOU  570  O   ASP A  72     6940   5197   2730   -750   1217    236       O  
ATOM    571  CB  ASP A  72     -37.600   9.413 -14.592  1.00 49.92           C  
ANISOU  571  CB  ASP A  72     8481   6975   3510   -733   1129    292       C  
ATOM    572  N   ASP A  73     -37.086   7.792 -11.683  1.00 34.95           N  
ANISOU  572  N   ASP A  73     6455   4713   2111   -754   1083   -127       N  
ATOM    573  CA  ASP A  73     -37.555   7.673 -10.305  1.00 31.19           C  
ANISOU  573  CA  ASP A  73     5924   4095   1831   -757    994   -162       C  
ATOM    574  C   ASP A  73     -36.415   7.660  -9.302  1.00 37.08           C  
ANISOU  574  C   ASP A  73     6583   4693   2815   -731   1141   -278       C  
ATOM    575  O   ASP A  73     -36.641   7.730  -8.094  1.00 32.18           O  
ANISOU  575  O   ASP A  73     5907   3953   2367   -718   1101   -299       O  
ATOM    576  CB  ASP A  73     -38.399   6.412 -10.163  1.00 36.18           C  
ANISOU  576  CB  ASP A  73     6575   4745   2427   -770    800   -302       C  
ATOM    577  CG  ASP A  73     -39.698   6.508 -10.920  1.00 42.69           C  
ANISOU  577  CG  ASP A  73     7456   5703   3062   -797    623   -185       C  
ATOM    578  OD1 ASP A  73     -40.388   7.540 -10.771  1.00 38.81           O  
ANISOU  578  OD1 ASP A  73     6954   5221   2571   -797    573     21       O  
ATOM    579  OD2 ASP A  73     -40.021   5.565 -11.674  1.00 40.62           O1-
ANISOU  579  OD2 ASP A  73     7234   5534   2665   -807    531   -297       O1-
ATOM    580  N   SER A  74     -35.191   7.561  -9.804  1.00 35.78           N  
ANISOU  580  N   SER A  74     6391   4545   2657   -715   1306   -357       N  
ATOM    581  CA  SER A  74     -34.014   7.582  -8.946  1.00 38.60           C  
ANISOU  581  CA  SER A  74     6636   4777   3252   -683   1439   -467       C  
ATOM    582  C   SER A  74     -33.875   8.953  -8.306  1.00 36.54           C  
ANISOU  582  C   SER A  74     6321   4422   3142   -693   1542   -318       C  
ATOM    583  O   SER A  74     -34.407   9.941  -8.809  1.00 38.72           O  
ANISOU  583  O   SER A  74     6638   4739   3334   -719   1548   -108       O  
ATOM    584  CB  SER A  74     -32.753   7.271  -9.758  1.00 47.50           C  
ANISOU  584  CB  SER A  74     7738   5964   4346   -666   1591   -558       C  
ATOM    585  OG  SER A  74     -32.855   6.023 -10.419  1.00 43.72           O  
ANISOU  585  OG  SER A  74     7307   5571   3733   -646   1505   -691       O  
ATOM    586  N   GLY A  75     -33.153   9.013  -7.194  1.00 33.99           N  
ANISOU  586  N   GLY A  75     5881   3968   3065   -661   1606   -420       N  
ATOM    587  CA  GLY A  75     -32.857  10.289  -6.578  1.00 36.49           C  
ANISOU  587  CA  GLY A  75     6116   4181   3567   -668   1720   -307       C  
ATOM    588  C   GLY A  75     -33.163  10.284  -5.101  1.00 33.98           C  
ANISOU  588  C   GLY A  75     5691   3738   3483   -615   1604   -369       C  
ATOM    589  O   GLY A  75     -33.255   9.222  -4.475  1.00 36.30           O  
ANISOU  589  O   GLY A  75     5978   4014   3799   -575   1506   -532       O  
ATOM    590  N   THR A  76     -33.341  11.478  -4.546  1.00 30.11           N  
ANISOU  590  N   THR A  76     5111   3156   3175   -607   1599   -232       N  
ATOM    591  CA  THR A  76     -33.553  11.642  -3.115  1.00 28.15           C  
ANISOU  591  CA  THR A  76     4740   2791   3163   -545   1491   -288       C  
ATOM    592  C   THR A  76     -35.031  11.723  -2.780  1.00 32.62           C  
ANISOU  592  C   THR A  76     5340   3370   3685   -526   1294   -169       C  
ATOM    593  O   THR A  76     -35.758  12.539  -3.350  1.00 29.41           O  
ANISOU  593  O   THR A  76     4977   2988   3208   -550   1268     30       O  
ATOM    594  CB  THR A  76     -32.855  12.923  -2.610  1.00 30.24           C  
ANISOU  594  CB  THR A  76     4874   2936   3680   -542   1599   -239       C  
ATOM    595  CG2 THR A  76     -33.042  13.089  -1.108  1.00 30.09           C  
ANISOU  595  CG2 THR A  76     4733   2811   3888   -469   1483   -320       C  
ATOM    596  OG1 THR A  76     -31.456  12.859  -2.927  1.00 36.51           O  
ANISOU  596  OG1 THR A  76     5614   3724   4533   -568   1789   -350       O  
ATOM    597  N   TYR A  77     -35.471  10.878  -1.846  1.00 26.11           N  
ANISOU  597  N   TYR A  77     4488   2527   2906   -477   1159   -283       N  
ATOM    598  CA  TYR A  77     -36.836  10.936  -1.344  1.00 22.03           C  
ANISOU  598  CA  TYR A  77     3970   2016   2384   -454    982   -185       C  
ATOM    599  C   TYR A  77     -36.774  11.397   0.086  1.00 20.81           C  
ANISOU  599  C   TYR A  77     3684   1753   2470   -380    945   -229       C  
ATOM    600  O   TYR A  77     -35.959  10.895   0.858  1.00 27.76           O  
ANISOU  600  O   TYR A  77     4503   2586   3460   -337    976   -395       O  
ATOM    601  CB  TYR A  77     -37.528   9.574  -1.451  1.00 23.21           C  
ANISOU  601  CB  TYR A  77     4199   2238   2382   -469    856   -264       C  
ATOM    602  CG  TYR A  77     -37.871   9.249  -2.888  1.00 25.44           C  
ANISOU  602  CG  TYR A  77     4617   2643   2405   -542    854   -206       C  
ATOM    603  CD1 TYR A  77     -39.106   9.600  -3.424  1.00 22.32           C  
ANISOU  603  CD1 TYR A  77     4269   2324   1887   -571    733    -37       C  
ATOM    604  CD2 TYR A  77     -36.947   8.629  -3.708  1.00 25.18           C  
ANISOU  604  CD2 TYR A  77     4661   2658   2249   -574    972   -324       C  
ATOM    605  CE1 TYR A  77     -39.414   9.330  -4.754  1.00 26.50           C  
ANISOU  605  CE1 TYR A  77     4926   2983   2160   -632    717     11       C  
ATOM    606  CE2 TYR A  77     -37.247   8.353  -5.044  1.00 28.04           C  
ANISOU  606  CE2 TYR A  77     5156   3147   2350   -634    972   -282       C  
ATOM    607  CZ  TYR A  77     -38.484   8.703  -5.546  1.00 29.25           C  
ANISOU  607  CZ  TYR A  77     5360   3381   2372   -664    837   -115       C  
ATOM    608  OH  TYR A  77     -38.799   8.436  -6.861  1.00 32.47           O  
ANISOU  608  OH  TYR A  77     5902   3932   2504   -718    819    -79       O  
ATOM    609  N   ARG A  78     -37.626  12.362   0.421  1.00 19.98           N  
ANISOU  609  N   ARG A  78     3535   1615   2440   -356    878    -82       N  
ATOM    610  CA  ARG A  78     -37.624  12.938   1.761  1.00 21.74           C  
ANISOU  610  CA  ARG A  78     3637   1740   2882   -279    846   -123       C  
ATOM    611  C   ARG A  78     -39.027  12.951   2.357  1.00 23.81           C  
ANISOU  611  C   ARG A  78     3882   2025   3140   -236    692    -35       C  
ATOM    612  O   ARG A  78     -39.995  13.301   1.675  1.00 22.03           O  
ANISOU  612  O   ARG A  78     3702   1852   2818   -262    632    129       O  
ATOM    613  CB  ARG A  78     -37.071  14.371   1.699  1.00 21.19           C  
ANISOU  613  CB  ARG A  78     3504   1573   2976   -281    953    -49       C  
ATOM    614  CG  ARG A  78     -37.175  15.133   3.021  1.00 20.77           C  
ANISOU  614  CG  ARG A  78     3295   1478   3117   -190    879    -88       C  
ATOM    615  CD  ARG A  78     -36.718  16.579   2.881  1.00 23.26           C  
ANISOU  615  CD  ARG A  78     3536   1722   3580   -195    954    -15       C  
ATOM    616  NE  ARG A  78     -35.302  16.708   2.552  1.00 27.47           N  
ANISOU  616  NE  ARG A  78     4029   2229   4179   -240   1098   -102       N  
ATOM    617  CZ  ARG A  78     -34.338  16.853   3.456  1.00 28.12           C  
ANISOU  617  CZ  ARG A  78     3959   2345   4379   -202   1085   -243       C  
ATOM    618  NH1 ARG A  78     -34.635  16.853   4.752  1.00 26.99           N1+
ANISOU  618  NH1 ARG A  78     3712   2277   4264   -126    925   -300       N1+
ATOM    619  NH2 ARG A  78     -33.075  16.988   3.067  1.00 34.65           N  
ANISOU  619  NH2 ARG A  78     4743   3143   5279   -252   1229   -309       N  
ATOM    620  N   ALA A  79     -39.131  12.583   3.637  1.00 17.85           N  
ANISOU  620  N   ALA A  79     3054   1239   2488   -164    630   -140       N  
ATOM    621  CA  ALA A  79     -40.365  12.744   4.393  1.00 19.51           C  
ANISOU  621  CA  ALA A  79     3220   1464   2731   -110    512    -64       C  
ATOM    622  C   ALA A  79     -40.164  13.893   5.360  1.00 19.64           C  
ANISOU  622  C   ALA A  79     3076   1474   2911    -28    492    -73       C  
ATOM    623  O   ALA A  79     -39.098  14.005   5.963  1.00 20.63           O  
ANISOU  623  O   ALA A  79     3102   1644   3092      1    499   -183       O  
ATOM    624  CB  ALA A  79     -40.704  11.472   5.166  1.00 17.74           C  
ANISOU  624  CB  ALA A  79     2973   1313   2455    -82    417   -154       C  
ATOM    625  N   VAL A  80     -41.177  14.737   5.502  1.00 15.57           N  
ANISOU  625  N   VAL A  80     2542    925   2451      6    449     51       N  
ATOM    626  CA  VAL A  80     -41.155  15.794   6.512  1.00 16.96           C  
ANISOU  626  CA  VAL A  80     2587   1106   2749     81    409     21       C  
ATOM    627  C   VAL A  80     -42.377  15.631   7.404  1.00 20.08           C  
ANISOU  627  C   VAL A  80     2944   1543   3141    148    309     48       C  
ATOM    628  O   VAL A  80     -43.502  15.587   6.904  1.00 20.08           O  
ANISOU  628  O   VAL A  80     2991   1523   3116    143    281    189       O  
ATOM    629  CB  VAL A  80     -41.184  17.170   5.858  1.00 21.05           C  
ANISOU  629  CB  VAL A  80     3104   1542   3353     70    463    139       C  
ATOM    630  CG1 VAL A  80     -41.174  18.275   6.920  1.00 23.10           C  
ANISOU  630  CG1 VAL A  80     3252   1802   3725    139    425     86       C  
ATOM    631  CG2 VAL A  80     -39.998  17.311   4.906  1.00 24.27           C  
ANISOU  631  CG2 VAL A  80     3556   1903   3762     -5    588    131       C  
ATOM    632  N   CYS A  81     -42.162  15.580   8.723  1.00 17.85           N  
ANISOU  632  N   CYS A  81     2583   1337   2861    209    254    -65       N  
ATOM    633  CA  CYS A  81     -43.226  15.315   9.689  1.00 19.80           C  
ANISOU  633  CA  CYS A  81     2800   1637   3085    274    184    -55       C  
ATOM    634  C   CYS A  81     -43.369  16.516  10.594  1.00 17.21           C  
ANISOU  634  C   CYS A  81     2407   1326   2807    339    171    -77       C  
ATOM    635  O   CYS A  81     -42.393  16.918  11.231  1.00 19.48           O  
ANISOU  635  O   CYS A  81     2669   1644   3086    348    177   -165       O  
ATOM    636  CB  CYS A  81     -42.848  14.136  10.578  1.00 20.02           C  
ANISOU  636  CB  CYS A  81     2829   1756   3022    291    139   -153       C  
ATOM    637  SG  CYS A  81     -42.478  12.649   9.626  1.00 21.64           S  
ANISOU  637  SG  CYS A  81     3105   1949   3170    210    154   -169       S  
ATOM    638  N   THR A  82     -44.564  17.091  10.653  1.00 15.85           N  
ANISOU  638  N   THR A  82     2207   1136   2680    383    153     12       N  
ATOM    639  CA  THR A  82     -44.755  18.351  11.373  1.00 18.13           C  
ANISOU  639  CA  THR A  82     2442   1422   3023    441    151     -9       C  
ATOM    640  C   THR A  82     -45.954  18.296  12.310  1.00 24.39           C  
ANISOU  640  C   THR A  82     3195   2281   3790    518    111      4       C  
ATOM    641  O   THR A  82     -46.995  17.739  11.986  1.00 23.09           O  
ANISOU  641  O   THR A  82     3018   2129   3625    525     88     97       O  
ATOM    642  CB  THR A  82     -44.973  19.516  10.378  1.00 21.50           C  
ANISOU  642  CB  THR A  82     2866   1746   3558    426    182     99       C  
ATOM    643  CG2 THR A  82     -45.094  20.853  11.109  1.00 29.89           C  
ANISOU  643  CG2 THR A  82     3878   2786   4693    483    182     63       C  
ATOM    644  OG1 THR A  82     -43.865  19.583   9.467  1.00 23.92           O  
ANISOU  644  OG1 THR A  82     3211   1990   3889    352    239     99       O  
ATOM    645  N   ASN A  83     -45.797  18.878  13.488  1.00 20.37           N  
ANISOU  645  N   ASN A  83     2667   1818   3255    576    108    -79       N  
ATOM    646  CA  ASN A  83     -46.949  19.248  14.297  1.00 21.07           C  
ANISOU  646  CA  ASN A  83     2710   1950   3346    659     90    -62       C  
ATOM    647  C   ASN A  83     -46.662  20.600  14.951  1.00 21.43           C  
ANISOU  647  C   ASN A  83     2716   1949   3478    696    119   -117       C  
ATOM    648  O   ASN A  83     -45.627  21.216  14.680  1.00 20.96           O  
ANISOU  648  O   ASN A  83     2657   1819   3487    649    146   -157       O  
ATOM    649  CB  ASN A  83     -47.356  18.140  15.295  1.00 22.56           C  
ANISOU  649  CB  ASN A  83     2893   2241   3439    698     78    -92       C  
ATOM    650  CG  ASN A  83     -46.365  17.957  16.439  1.00 21.84           C  
ANISOU  650  CG  ASN A  83     2808   2180   3309    708    119   -182       C  
ATOM    651  ND2 ASN A  83     -46.552  16.887  17.220  1.00 21.91           N  
ANISOU  651  ND2 ASN A  83     2826   2268   3230    723    130   -180       N  
ATOM    652  OD1 ASN A  83     -45.458  18.765  16.630  1.00 21.79           O  
ANISOU  652  OD1 ASN A  83     2787   2126   3367    686    140   -243       O  
ATOM    653  N   TYR A  84     -47.571  21.087  15.785  1.00 22.19           N  
ANISOU  653  N   TYR A  84     2774   2077   3582    781    115   -121       N  
ATOM    654  CA  TYR A  84     -47.395  22.431  16.324  1.00 26.84           C  
ANISOU  654  CA  TYR A  84     3331   2603   4266    821    138   -172       C  
ATOM    655  C   TYR A  84     -46.158  22.562  17.214  1.00 25.04           C  
ANISOU  655  C   TYR A  84     3096   2367   4050    795    161   -290       C  
ATOM    656  O   TYR A  84     -45.665  23.664  17.439  1.00 25.99           O  
ANISOU  656  O   TYR A  84     3188   2410   4277    793    173   -350       O  
ATOM    657  CB  TYR A  84     -48.660  22.904  17.040  1.00 28.68           C  
ANISOU  657  CB  TYR A  84     3525   2875   4497    929    131   -157       C  
ATOM    658  CG  TYR A  84     -48.834  22.386  18.452  1.00 23.60           C  
ANISOU  658  CG  TYR A  84     2874   2331   3763    997    155   -215       C  
ATOM    659  CD1 TYR A  84     -48.397  23.135  19.536  1.00 30.29           C  
ANISOU  659  CD1 TYR A  84     3706   3154   4650   1036    192   -304       C  
ATOM    660  CD2 TYR A  84     -49.474  21.176  18.702  1.00 24.58           C  
ANISOU  660  CD2 TYR A  84     2999   2566   3775   1016    143   -176       C  
ATOM    661  CE1 TYR A  84     -48.567  22.689  20.834  1.00 28.30           C  
ANISOU  661  CE1 TYR A  84     3443   2977   4333   1089    236   -336       C  
ATOM    662  CE2 TYR A  84     -49.664  20.720  20.013  1.00 26.69           C  
ANISOU  662  CE2 TYR A  84     3254   2918   3967   1050    197   -188       C  
ATOM    663  CZ  TYR A  84     -49.204  21.486  21.068  1.00 27.40           C  
ANISOU  663  CZ  TYR A  84     3327   2964   4119   1088    258   -259       C  
ATOM    664  OH  TYR A  84     -49.372  21.055  22.372  1.00 27.34           O  
ANISOU  664  OH  TYR A  84     3277   2996   4116   1097    321   -280       O  
ATOM    665  N   LYS A  85     -45.656  21.428  17.698  1.00 22.33           N  
ANISOU  665  N   LYS A  85     2772   2099   3612    772    161   -324       N  
ATOM    666  CA  LYS A  85     -44.484  21.395  18.565  1.00 23.13           C  
ANISOU  666  CA  LYS A  85     2853   2209   3725    743    162   -433       C  
ATOM    667  C   LYS A  85     -43.144  21.420  17.838  1.00 24.92           C  
ANISOU  667  C   LYS A  85     3071   2386   4010    649    159   -472       C  
ATOM    668  O   LYS A  85     -42.131  21.793  18.434  1.00 26.41           O  
ANISOU  668  O   LYS A  85     3215   2563   4258    625    147   -574       O  
ATOM    669  CB  LYS A  85     -44.526  20.157  19.463  1.00 26.41           C  
ANISOU  669  CB  LYS A  85     3285   2723   4027    761    165   -442       C  
ATOM    670  CG  LYS A  85     -45.471  20.273  20.624  1.00 28.55           C  
ANISOU  670  CG  LYS A  85     3537   3043   4268    850    189   -441       C  
ATOM    671  CD  LYS A  85     -44.946  21.324  21.596  1.00 34.66           C  
ANISOU  671  CD  LYS A  85     4267   3790   5112    876    169   -566       C  
ATOM    672  CE  LYS A  85     -45.540  21.177  22.965  1.00 41.76           C  
ANISOU  672  CE  LYS A  85     5145   4756   5965    951    184   -601       C  
ATOM    673  NZ  LYS A  85     -44.894  22.150  23.883  1.00 36.08           N1+
ANISOU  673  NZ  LYS A  85     4389   4020   5302    978    142   -748       N1+
ATOM    674  N   GLY A  86     -43.120  20.989  16.574  1.00 21.12           N  
ANISOU  674  N   GLY A  86     2757   1978   3290    476    -91   -594       N  
ATOM    675  CA  GLY A  86     -41.876  20.959  15.829  1.00 20.66           C  
ANISOU  675  CA  GLY A  86     2618   1838   3392    409    -22   -699       C  
ATOM    676  C   GLY A  86     -41.931  20.128  14.570  1.00 20.04           C  
ANISOU  676  C   GLY A  86     2695   1704   3216    365     23   -440       C  
ATOM    677  O   GLY A  86     -43.007  19.810  14.077  1.00 22.52           O  
ANISOU  677  O   GLY A  86     3151   2015   3390    378     14   -198       O  
ATOM    678  N   GLU A  87     -40.761  19.776  14.064  1.00 21.00           N  
ANISOU  678  N   GLU A  87     2751   1797   3431    321     65   -553       N  
ATOM    679  CA  GLU A  87     -40.694  19.019  12.824  1.00 18.49           C  
ANISOU  679  CA  GLU A  87     2568   1433   3025    279    123   -346       C  
ATOM    680  C   GLU A  87     -39.503  18.079  12.829  1.00 22.04           C  
ANISOU  680  C   GLU A  87     2925   1965   3484    291     45   -513       C  
ATOM    681  O   GLU A  87     -38.509  18.317  13.512  1.00 24.01           O  
ANISOU  681  O   GLU A  87     2972   2260   3892    318     -2   -840       O  
ATOM    682  CB  GLU A  87     -40.618  19.974  11.631  1.00 24.50           C  
ANISOU  682  CB  GLU A  87     3417   1956   3936    193    401   -234       C  
ATOM    683  CG  GLU A  87     -39.308  20.710  11.483  1.00 47.62           C  
ANISOU  683  CG  GLU A  87     6192   4701   7199     72    651   -495       C  
ATOM    684  CD  GLU A  87     -39.183  21.408  10.133  1.00 72.84           C  
ANISOU  684  CD  GLU A  87     9588   7608  10481     11   1024   -304       C  
ATOM    685  OE1 GLU A  87     -40.157  21.383   9.348  1.00 75.78           O  
ANISOU  685  OE1 GLU A  87    10225   7970  10598    125   1016     27       O  
ATOM    686  OE2 GLU A  87     -38.104  21.972   9.855  1.00 83.64           O1-
ANISOU  686  OE2 GLU A  87    10822   8868  12089   -123   1291   -482       O1-
ATOM    687  N   ALA A  88     -39.616  17.000  12.059  1.00 18.71           N  
ANISOU  687  N   ALA A  88     2624   1575   2909    293     15   -336       N  
ATOM    688  CA  ALA A  88     -38.498  16.092  11.867  1.00 17.60           C  
ANISOU  688  CA  ALA A  88     2407   1484   2796    305    -38   -477       C  
ATOM    689  C   ALA A  88     -38.504  15.723  10.405  1.00 19.86           C  
ANISOU  689  C   ALA A  88     2806   1685   3057    208    108   -306       C  
ATOM    690  O   ALA A  88     -39.559  15.707   9.778  1.00 22.67           O  
ANISOU  690  O   ALA A  88     3316   2031   3266    213    132    -72       O  
ATOM    691  CB  ALA A  88     -38.687  14.843  12.696  1.00 20.71           C  
ANISOU  691  CB  ALA A  88     2869   2030   2972    469   -253   -440       C  
ATOM    692  N   SER A  89     -37.335  15.402   9.871  1.00 18.84           N  
ANISOU  692  N   SER A  89     2582   1517   3061    148    189   -466       N  
ATOM    693  CA  SER A  89     -37.267  15.027   8.459  1.00 18.10           C  
ANISOU  693  CA  SER A  89     2613   1356   2909     73    346   -321       C  
ATOM    694  C   SER A  89     -36.244  13.932   8.268  1.00 20.61           C  
ANISOU  694  C   SER A  89     2819   1730   3281     66    285   -487       C  
ATOM    695  O   SER A  89     -35.301  13.791   9.056  1.00 24.33           O  
ANISOU  695  O   SER A  89     3089   2248   3909    110    181   -773       O  
ATOM    696  CB  SER A  89     -36.912  16.239   7.596  1.00 20.60           C  
ANISOU  696  CB  SER A  89     2996   1452   3379    -34    699   -306       C  
ATOM    697  OG  SER A  89     -37.023  15.911   6.212  1.00 24.81           O  
ANISOU  697  OG  SER A  89     3733   1946   3747    -36    849   -117       O  
ATOM    698  N   ASP A  90     -36.440  13.133   7.221  1.00 17.86           N  
ANISOU  698  N   ASP A  90     2588   1401   2798     44    320   -347       N  
ATOM    699  CA  ASP A  90     -35.523  12.043   6.911  1.00 21.91           C  
ANISOU  699  CA  ASP A  90     3003   1952   3369     33    280   -494       C  
ATOM    700  C   ASP A  90     -35.453  11.963   5.399  1.00 20.43           C  
ANISOU  700  C   ASP A  90     2938   1709   3114    -57    499   -399       C  
ATOM    701  O   ASP A  90     -36.402  12.338   4.717  1.00 21.46           O  
ANISOU  701  O   ASP A  90     3263   1843   3047    -24    561   -180       O  
ATOM    702  CB  ASP A  90     -36.064  10.728   7.476  1.00 21.05           C  
ANISOU  702  CB  ASP A  90     2931   1956   3112    156     40   -414       C  
ATOM    703  CG  ASP A  90     -35.098   9.566   7.317  1.00 26.98           C  
ANISOU  703  CG  ASP A  90     3586   2727   3939    190    -22   -570       C  
ATOM    704  OD1 ASP A  90     -33.866   9.764   7.358  1.00 29.43           O  
ANISOU  704  OD1 ASP A  90     3719   3016   4445    174      6   -837       O  
ATOM    705  OD2 ASP A  90     -35.590   8.435   7.158  1.00 34.93           O1-
ANISOU  705  OD2 ASP A  90     4672   3755   4846    232    -85   -463       O1-
ATOM    706  N   TYR A  91     -34.323  11.506   4.873  1.00 19.91           N  
ANISOU  706  N   TYR A  91     2764   1606   3195   -134    611   -590       N  
ATOM    707  CA  TYR A  91     -34.207  11.346   3.429  1.00 22.34           C  
ANISOU  707  CA  TYR A  91     3216   1876   3396   -196    838   -509       C  
ATOM    708  C   TYR A  91     -33.328  10.154   3.104  1.00 27.01           C  
ANISOU  708  C   TYR A  91     3660   2517   4087   -234    793   -706       C  
ATOM    709  O   TYR A  91     -32.516   9.730   3.921  1.00 28.26           O  
ANISOU  709  O   TYR A  91     3592   2688   4456   -215    654   -947       O  
ATOM    710  CB  TYR A  91     -33.654  12.614   2.782  1.00 25.56           C  
ANISOU  710  CB  TYR A  91     3722   2069   3921   -301   1259   -517       C  
ATOM    711  CG  TYR A  91     -32.234  12.946   3.180  1.00 28.44           C  
ANISOU  711  CG  TYR A  91     3807   2291   4709   -451   1449   -890       C  
ATOM    712  CD1 TYR A  91     -31.154  12.430   2.478  1.00 37.82           C  
ANISOU  712  CD1 TYR A  91     4883   3423   6062   -564   1646  -1112       C  
ATOM    713  CD2 TYR A  91     -31.977  13.777   4.260  1.00 29.60           C  
ANISOU  713  CD2 TYR A  91     3758   2371   5116   -475   1429  -1087       C  
ATOM    714  CE1 TYR A  91     -29.853  12.733   2.840  1.00 48.00           C  
ANISOU  714  CE1 TYR A  91     5808   4715   7713   -680   1751  -1444       C  
ATOM    715  CE2 TYR A  91     -30.675  14.089   4.629  1.00 40.00           C  
ANISOU  715  CE2 TYR A  91     4705   3728   6764   -574   1510  -1424       C  
ATOM    716  CZ  TYR A  91     -29.620  13.561   3.918  1.00 47.07           C  
ANISOU  716  CZ  TYR A  91     5449   4638   7797   -674   1667  -1594       C  
ATOM    717  OH  TYR A  91     -28.326  13.863   4.280  1.00 54.82           O  
ANISOU  717  OH  TYR A  91     6009   5682   9137   -769   1745  -1947       O  
ATOM    718  N   ALA A  92     -33.500   9.622   1.899  1.00 22.86           N  
ANISOU  718  N   ALA A  92     3265   2033   3386   -246    891   -625       N  
ATOM    719  CA  ALA A  92     -32.724   8.486   1.436  1.00 24.52           C  
ANISOU  719  CA  ALA A  92     3345   2282   3689   -290    878   -812       C  
ATOM    720  C   ALA A  92     -32.718   8.507  -0.082  1.00 28.20           C  
ANISOU  720  C   ALA A  92     4000   2755   3960   -324   1137   -745       C  
ATOM    721  O   ALA A  92     -33.502   9.218  -0.709  1.00 27.94           O  
ANISOU  721  O   ALA A  92     4228   2735   3652   -242   1245   -524       O  
ATOM    722  CB  ALA A  92     -33.327   7.172   1.955  1.00 26.89           C  
ANISOU  722  CB  ALA A  92     3583   2702   3933   -190    559   -789       C  
ATOM    723  N  ATHR A  93     -31.833   7.711  -0.667  0.67 26.97           N  
ANISOU  723  N  ATHR A  93     3729   2601   3919   -401   1227   -947       N  
ATOM    724  N  BTHR A  93     -31.820   7.735  -0.682  0.33 27.66           N  
ANISOU  724  N  BTHR A  93     3819   2685   4007   -403   1235   -947       N  
ATOM    725  CA ATHR A  93     -31.692   7.685  -2.114  0.67 27.87           C  
ANISOU  725  CA ATHR A  93     4033   2729   3827   -418   1503   -917       C  
ATOM    726  CA BTHR A  93     -31.694   7.737  -2.135  0.33 29.64           C  
ANISOU  726  CA BTHR A  93     4268   2949   4046   -418   1516   -911       C  
ATOM    727  C  ATHR A  93     -32.259   6.413  -2.717  0.67 33.13           C  
ANISOU  727  C  ATHR A  93     4684   3598   4306   -339   1284   -948       C  
ATOM    728  C  BTHR A  93     -32.154   6.432  -2.773  0.33 32.15           C  
ANISOU  728  C  BTHR A  93     4559   3464   4192   -350   1313   -961       C  
ATOM    729  O  ATHR A  93     -32.148   5.332  -2.142  0.67 32.65           O  
ANISOU  729  O  ATHR A  93     4398   3576   4432   -354   1047  -1089       O  
ATOM    730  O  BTHR A  93     -31.874   5.345  -2.267  0.33 29.66           O  
ANISOU  730  O  BTHR A  93     4006   3177   4086   -380   1105  -1129       O  
ATOM    731  CB ATHR A  93     -30.220   7.805  -2.534  0.67 33.34           C  
ANISOU  731  CB ATHR A  93     4604   3254   4808   -596   1867  -1177       C  
ATOM    732  CB BTHR A  93     -30.250   8.058  -2.582  0.33 33.08           C  
ANISOU  732  CB BTHR A  93     4617   3194   4757   -598   1927  -1143       C  
ATOM    733  CG2ATHR A  93     -29.618   9.095  -2.012  0.67 30.60           C  
ANISOU  733  CG2ATHR A  93     4220   2672   4734   -709   2159  -1239       C  
ATOM    734  CG2BTHR A  93     -29.249   7.367  -1.679  0.33 37.14           C  
ANISOU  734  CG2BTHR A  93     4730   3687   5695   -681   1749  -1490       C  
ATOM    735  OG1ATHR A  93     -29.483   6.687  -2.024  0.67 40.67           O  
ANISOU  735  OG1ATHR A  93     5198   4228   6026   -641   1646  -1468       O  
ATOM    736  OG1BTHR A  93     -30.054   7.611  -3.932  0.33 32.36           O  
ANISOU  736  OG1BTHR A  93     4686   3155   4453   -598   2150  -1154       O  
ATOM    737  N   LEU A  94     -32.875   6.557  -3.883  1.00 30.80           N  
ANISOU  737  N   LEU A  94     4642   3426   3636   -220   1376   -834       N  
ATOM    738  CA  LEU A  94     -33.266   5.409  -4.688  1.00 31.80           C  
ANISOU  738  CA  LEU A  94     4721   3759   3602   -152   1227   -965       C  
ATOM    739  C   LEU A  94     -32.363   5.315  -5.908  1.00 35.72           C  
ANISOU  739  C   LEU A  94     5329   4248   3996   -193   1556  -1075       C  
ATOM    740  O   LEU A  94     -32.146   6.305  -6.608  1.00 35.91           O  
ANISOU  740  O   LEU A  94     5666   4192   3787   -134   1898   -922       O  
ATOM    741  CB  LEU A  94     -34.713   5.544  -5.152  1.00 30.25           C  
ANISOU  741  CB  LEU A  94     4688   3786   3020     82   1019   -854       C  
ATOM    742  CG  LEU A  94     -35.248   4.309  -5.882  1.00 33.94           C  
ANISOU  742  CG  LEU A  94     5017   4494   3387    156    820  -1096       C  
ATOM    743  CD1 LEU A  94     -35.265   3.091  -4.961  1.00 33.06           C  
ANISOU  743  CD1 LEU A  94     4560   4313   3688      0    629  -1270       C  
ATOM    744  CD2 LEU A  94     -36.627   4.582  -6.464  1.00 34.55           C  
ANISOU  744  CD2 LEU A  94     5223   4832   3071    438    608  -1085       C  
ATOM    745  N   ASP A  95     -31.835   4.123  -6.160  1.00 31.96           N  
ANISOU  745  N   ASP A  95     4624   3825   3696   -286   1498  -1332       N  
ATOM    746  CA  ASP A  95     -31.105   3.866  -7.393  1.00 36.40           C  
ANISOU  746  CA  ASP A  95     5276   4422   4130   -314   1789  -1474       C  
ATOM    747  C   ASP A  95     -31.820   2.784  -8.173  1.00 35.49           C  
ANISOU  747  C   ASP A  95     5106   4584   3794   -187   1558  -1637       C  
ATOM    748  O   ASP A  95     -31.826   1.620  -7.777  1.00 41.97           O  
ANISOU  748  O   ASP A  95     5617   5426   4902   -269   1336  -1846       O  
ATOM    749  CB  ASP A  95     -29.663   3.451  -7.102  1.00 41.15           C  
ANISOU  749  CB  ASP A  95     5607   4835   5194   -549   1971  -1728       C  
ATOM    750  CG  ASP A  95     -28.795   4.621  -6.681  1.00 71.00           C  
ANISOU  750  CG  ASP A  95     9424   8351   9202   -683   2315  -1695       C  
ATOM    751  OD1 ASP A  95     -28.897   5.698  -7.309  1.00 80.23           O  
ANISOU  751  OD1 ASP A  95    10929   9436  10116   -636   2634  -1465       O  
ATOM    752  OD2 ASP A  95     -28.016   4.467  -5.717  1.00 79.06           O1-
ANISOU  752  OD2 ASP A  95    10120   9251  10668   -808   2203  -1863       O1-
ATOM    753  N   VAL A  96     -32.436   3.178  -9.281  1.00 43.38           N  
ANISOU  753  N   VAL A  96     6415   5790   4278     49   1618  -1560       N  
ATOM    754  CA  VAL A  96     -33.098   2.222 -10.158  1.00 42.95           C  
ANISOU  754  CA  VAL A  96     6285   6050   3984    209   1397  -1807       C  
ATOM    755  C   VAL A  96     -32.082   1.657 -11.148  1.00 46.54           C  
ANISOU  755  C   VAL A  96     6741   6526   4414    129   1670  -2020       C  
ATOM    756  O   VAL A  96     -31.525   2.385 -11.968  1.00 51.02           O  
ANISOU  756  O   VAL A  96     7624   7050   4710    218   1991  -1844       O  
ATOM    757  CB  VAL A  96     -34.288   2.867 -10.894  1.00 42.97           C  
ANISOU  757  CB  VAL A  96     6601   6336   3390    596   1250  -1696       C  
ATOM    758  CG1 VAL A  96     -35.085   1.812 -11.644  1.00 42.36           C  
ANISOU  758  CG1 VAL A  96     6324   6593   3176    754    927  -2042       C  
ATOM    759  CG2 VAL A  96     -35.180   3.597  -9.903  1.00 40.35           C  
ANISOU  759  CG2 VAL A  96     6281   5939   3110    657   1043  -1471       C  
ATOM    760  N   THR A  97     -31.835   0.355 -11.056  1.00 44.45           N  
ANISOU  760  N   THR A  97     6098   6276   4513    -14   1488  -2290       N  
ATOM    761  CA  THR A  97     -30.780  -0.286 -11.838  1.00 54.00           C  
ANISOU  761  CA  THR A  97     7223   7451   5842   -121   1665  -2436       C  
ATOM    762  C   THR A  97     -31.332  -1.010 -13.062  1.00 61.13           C  
ANISOU  762  C   THR A  97     8149   8654   6425     81   1520  -2625       C  
ATOM    763  O   THR A  97     -32.421  -1.579 -13.016  1.00 60.13           O  
ANISOU  763  O   THR A  97     7860   8706   6282    185   1184  -2757       O  
ATOM    764  CB  THR A  97     -29.990  -1.284 -10.973  1.00 52.48           C  
ANISOU  764  CB  THR A  97     6612   7049   6279   -394   1577  -2593       C  
ATOM    765  CG2 THR A  97     -29.447  -0.588  -9.731  1.00 52.98           C  
ANISOU  765  CG2 THR A  97     6636   6845   6650   -530   1653  -2447       C  
ATOM    766  OG1 THR A  97     -30.854  -2.355 -10.571  1.00 55.37           O  
ANISOU  766  OG1 THR A  97     6710   7496   6831   -376   1241  -2730       O  
HETATM  767 ZN    ZN B   1     -41.892  -0.004 -16.392  0.38 28.72          Zn  
HETATM  768 CL    CL C   1     -42.910   3.857  18.106  0.86 28.25          Cl  
HETATM  769 CL    CL D   1     -34.580  16.990  -0.484  1.00 34.40          Cl  
HETATM  770 CL    CL E   1     -47.843  10.447  13.523  1.00 26.35          Cl  
HETATM  771  O   HOH S   1     -36.729   2.412   3.864  1.00 19.96           O  
HETATM  772  O   HOH S   2     -36.305   1.928   6.756  1.00 22.10           O  
HETATM  773  O   HOH S   3     -50.293  19.892  15.532  1.00 26.94           O  
HETATM  774  O   HOH S   4     -41.275  18.958  21.980  1.00 25.40           O  
HETATM  775  O   HOH S   5     -35.941  13.026  14.687  1.00 28.17           O  
HETATM  776  O   HOH S   6     -47.893   3.070   6.730  1.00 29.23           O  
HETATM  777  O   HOH S   7     -46.816   9.054   4.901  1.00 22.22           O  
HETATM  778  O   HOH S   8     -44.839  18.233   7.043  1.00 27.36           O  
HETATM  779  O   HOH S   9     -32.703   3.971  12.092  1.00 29.21           O  
HETATM  780  O   HOH S  10     -49.338  10.408   5.081  1.00 31.78           O  
HETATM  781  O   HOH S  11     -46.642   8.977  15.826  1.00 25.42           O  
HETATM  782  O   HOH S  12     -27.424   7.557   1.148  1.00 32.59           O  
HETATM  783  O   HOH S  13     -46.712  15.014  -0.010  1.00 29.09           O  
HETATM  784  O   HOH S  14     -49.164  22.215  24.832  1.00 37.89           O  
HETATM  785  O   HOH S  15     -36.478  15.109  -1.911  1.00 30.81           O  
HETATM  786  O   HOH S  16     -32.128   7.808   6.382  1.00 32.25           O  
HETATM  787  O   HOH S  17     -45.736   9.805  21.657  1.00 40.27           O  
HETATM  788  O   HOH S  18     -47.027   7.016  17.191  1.00 30.47           O  
HETATM  789  O   HOH S  19     -39.125  -4.558  -5.454  1.00 38.91           O  
HETATM  790  O   HOH S  20     -37.831  -3.012  -3.150  1.00 39.24           O  
HETATM  791  O   HOH S  21     -45.025   6.095  16.932  1.00 30.34           O  
HETATM  792  O   HOH S  22     -50.480  13.906   6.673  1.00 37.65           O  
HETATM  793  O   HOH S  23     -39.727   2.806  17.807  1.00 33.26           O  
HETATM  794  O   HOH S  24     -43.652  14.291  25.867  1.00 44.21           O  
HETATM  795  O   HOH S  25     -44.191  -3.092 -13.424  1.00 45.33           O  
HETATM  796  O   HOH S  26     -48.242   0.320   7.666  1.00 49.27           O  
HETATM  797  O   HOH S  27     -35.035   0.000   8.196  1.00 32.38           O  
HETATM  798  O   HOH S  28     -43.515  22.978  13.532  1.00 37.99           O  
HETATM  799  O   HOH S  29     -43.044  21.402  -4.210  1.00 37.70           O  
HETATM  800  O   HOH S  30     -52.661   7.030   5.969  1.00 40.32           O  
HETATM  801  O   HOH S  31     -49.892  18.230  26.194  1.00 39.25           O  
HETATM  802  O   HOH S  32     -43.684  24.758  15.643  1.00 43.76           O  
HETATM  803  O   HOH S  33     -38.934  22.220  -9.254  1.00 40.50           O  
HETATM  804  O   HOH S  34     -53.091   6.135  11.959  1.00 43.43           O  
HETATM  805  O   HOH S  35     -49.983  11.795   8.612  1.00 42.78           O  
HETATM  806  O   HOH S  36     -46.242   8.362  19.229  1.00 42.22           O  
HETATM  807  O   HOH S  37     -31.446  15.268  -4.770  1.00 47.67           O  
HETATM  808  O   HOH S  38     -38.771  15.684  -8.628  1.00 43.63           O  
HETATM  809  O   HOH S  39     -36.923   0.403   2.027  1.00 37.14           O  
HETATM  810  O   HOH S  40     -50.455  17.953  13.670  1.00 38.30           O  
HETATM  811  O   HOH S  41     -31.656  12.321  -9.354  1.00 50.73           O  
HETATM  812  O   HOH S  42     -42.303  21.774  24.727  1.00 48.55           O  
HETATM  813  O   HOH S  43     -46.118  14.110  -7.838  1.00 43.33           O  
HETATM  814  O   HOH S  44     -38.970  21.675  18.439  1.00 54.69           O  
HETATM  815  O   HOH S  45     -45.756   1.799 -17.490  1.00 43.94           O  
HETATM  816  O   HOH S  46     -38.007   7.876  21.726  1.00 45.73           O  
HETATM  817  O   HOH S  47     -30.572  -3.996  -8.275  1.00 50.39           O  
HETATM  818  O   HOH S  48     -46.065  18.945  -6.645  1.00 48.83           O  
HETATM  819  O   HOH S  49     -35.197  -1.283   1.187  1.00 40.37           O  
HETATM  820  O   HOH S  50     -53.403  13.217  17.654  1.00 38.10           O  
HETATM  821  O   HOH S  51     -40.686  22.183  -4.628  1.00 44.68           O  
HETATM  822  O   HOH S  52     -32.081  14.150   8.258  1.00 50.03           O  
HETATM  823  O   HOH S  53     -38.608   2.299  15.600  1.00 46.70           O  
HETATM  824  O   HOH S  54     -41.222  23.623  12.640  1.00 49.10           O  
HETATM  825  O   HOH S  55     -51.699  13.437  -2.716  1.00 55.93           O  
HETATM  826  O   HOH S  56     -33.212  16.811  -3.629  1.00 47.98           O  
HETATM  827  O   HOH S  57     -32.763   2.610  14.503  1.00 47.74           O  
HETATM  828  O   HOH S  58     -53.994  17.663  20.810  1.00 46.07           O  
HETATM  829  O   HOH S  59     -50.801  21.660  26.675  1.00 50.12           O  
HETATM  830  O   HOH S  60     -44.077   4.464 -14.358  1.00 46.06           O  
HETATM  831  O   HOH S  61     -49.193  14.988   2.048  1.00 46.31           O  
HETATM  832  O   HOH S  62     -33.652  11.641 -11.194  1.00 52.84           O  
HETATM  833  O   HOH S  63     -37.986  16.904  16.467  1.00 55.94           O  
HETATM  834  O   HOH S  64     -44.368  22.331  -2.032  1.00 53.44           O  
HETATM  835  O   HOH S  65     -40.869  22.856  -7.433  1.00 40.26           O  
HETATM  836  O   HOH S  66     -41.083  24.600  17.289  1.00 62.29           O  
HETATM  837  O   HOH S  67     -36.773  14.623 -10.380  1.00 51.18           O  
HETATM  838  O   HOH S  68     -48.172   5.116  18.704  1.00 44.13           O  
HETATM  839  O   HOH S  69     -39.144  23.818  13.908  1.00 69.62           O  
HETATM  840  O   HOH S  70     -37.651  -7.956 -12.320  1.00 52.27           O  
HETATM  841  O   HOH S  71     -49.869  13.057   4.166  1.00 55.02           O  
HETATM  842  O   HOH S  72     -29.422  -1.153   0.749  1.00 50.27           O  
HETATM  843  O   HOH S  73     -47.771   2.752 -12.383  1.00 68.26           O  
HETATM  844  O   HOH S  74     -41.186   8.895  -8.449  1.00 34.44           O  
HETATM  845  O   HOH S  75     -42.946  20.050   4.598  1.00 43.71           O  
HETATM  846  O   HOH S  76     -35.570  18.613  -8.744  1.00 48.17           O  
HETATM  847  O   HOH S  77     -36.247  20.134  12.896  1.00 47.49           O  
HETATM  848  O   HOH S  78     -45.458  -2.919  -3.428  1.00 46.69           O  
HETATM  849  O   HOH S  79     -42.429  11.287  25.080  1.00 56.20           O  
HETATM  850  O   HOH S  80     -47.852   0.266 -12.161  1.00 54.65           O  
HETATM  851  O   HOH S  81     -25.940  -2.098   3.703  1.00 52.40           O  
HETATM  852  O   HOH S  82     -47.907  20.885   8.383  1.00 43.05           O  
HETATM  853  O   HOH S  83     -32.653  16.446   7.200  1.00 53.27           O  
HETATM  854  O   HOH S  84     -55.413  16.854  18.759  1.00 53.22           O  
HETATM  855  O   HOH S  85     -49.475  10.001  18.749  1.00 43.62           O  
HETATM  856  O   HOH S  86     -53.736  14.519  20.029  1.00 50.01           O  
HETATM  857  O   HOH S  87     -48.359   0.524  12.438  1.00 47.65           O  
HETATM  858  O   HOH S  88     -36.850   7.281 -16.729  1.00 51.49           O  
HETATM  859  O   HOH S  89     -42.800  10.989  -9.336  1.00 40.08           O  
HETATM  860  O   HOH S  90     -41.420  12.634  -9.137  1.00 44.16           O  
HETATM  861  O   HOH S  91     -29.635  -2.214  -1.995  1.00 43.89           O  
HETATM  862  O   HOH S  92     -30.372  13.695  -6.480  1.00 56.72           O  
HETATM  863  O   HOH S  93     -42.201  16.543  26.016  1.00 51.85           O  
HETATM  864  O   HOH S  94     -53.019  16.240  14.545  1.00 52.18           O  
HETATM  865  O   HOH S  95     -48.864  20.455  10.940  1.00 46.85           O  
HETATM  866  O   HOH S  96     -52.736  15.740  21.875  1.00 43.10           O  
HETATM  867  O   HOH S  97     -38.525  20.952  15.675  1.00 40.06           O  
HETATM  868  O   HOH S  98     -44.345  15.869  -8.127  1.00 46.21           O  
HETATM  869  O   HOH S  99     -53.857  14.697  24.343  1.00 54.32           O  
HETATM  870  O   HOH S 100     -43.321   7.696  21.748  1.00 46.87           O  
HETATM  871  O   HOH S 101     -20.416  20.955   0.807  1.00 50.95           O  
HETATM  872  O   HOH S 102     -21.561  21.783   2.129  1.00 56.43           O  
HETATM  873  O   HOH S 103     -49.379   6.369  21.068  1.00 64.57           O  
HETATM  874  O   HOH S 104     -25.754  -0.525   6.023  1.00 48.53           O  
HETATM  875  O   HOH S 105     -39.277  14.520  22.428  1.00 59.10           O  
HETATM  876  O   HOH S 106     -42.268  21.616   8.771  1.00 43.19           O  
HETATM  877  O   HOH S 107     -30.916   6.917  13.300  1.00 59.25           O  
HETATM  878  O   HOH S 108     -52.380  10.586   9.020  1.00 51.33           O  
HETATM  879  O   HOH S 109     -30.927   8.689  13.691  1.00 64.89           O  
HETATM  880  O   HOH S 110     -36.876  24.288   9.573  1.00 55.05           O  
HETATM  881  O   HOH S 111     -49.514  17.760   4.889  1.00 54.55           O  
HETATM  882  O   HOH S 112     -42.764   5.526  23.920  1.00 54.16           O  
HETATM  883  O   HOH S 113     -40.138   6.943 -16.843  1.00 51.88           O  
HETATM  884  O   HOH S 114     -51.523  11.219  18.353  1.00 56.13           O  
HETATM  885  O   HOH S 115     -22.565  15.738   5.728  1.00 49.34           O  
HETATM  886  O   HOH S 116     -22.123   7.923   6.302  1.00 54.36           O  
HETATM  887  O   HOH S 117     -25.258   4.532   5.612  1.00 56.51           O  
HETATM  888  O   HOH S 118     -39.441  -5.705 -13.806  1.00 47.74           O  
HETATM  889  O   HOH S 119     -45.762  -2.381 -11.292  1.00 64.39           O  
HETATM  890  O   HOH S 120     -23.164   5.557   6.897  1.00 50.46           O  
HETATM  891  O   HOH S 121     -49.902  16.682   3.498  1.00 65.04           O  
HETATM  892  O   HOH S 122     -30.153   5.452 -11.761  1.00 72.60           O  
HETATM  893  O   HOH S 123     -24.091  16.092   8.930  1.00 52.34           O  
HETATM  894  O   HOH S 124     -21.805  16.456   7.748  1.00 50.47           O  
HETATM  895  O   HOH S 125     -37.740  25.460  10.871  1.00 65.21           O  
HETATM  896  O   HOH S 126     -23.137   9.013   5.024  1.00 59.46           O  
HETATM  897  O   HOH S 127     -29.305  -1.925   6.883  1.00 53.62           O  
HETATM  898  O   HOH S 128     -35.649  17.643  13.748  1.00 68.70           O  
HETATM  899  O   HOH S 129     -34.996  14.917  12.342  1.00 32.19           O  
HETATM  900  O   HOH S 130     -57.105  13.668  19.010  1.00 46.15           O  
HETATM  901  O   HOH S 131     -51.226  -0.481  -6.215  1.00 43.76           O  
HETATM  902  O   HOH S 132     -41.557  22.063   5.994  1.00 44.93           O  
HETATM  903  O   HOH S 133     -51.647  18.731  11.709  1.00 50.69           O  
HETATM  904  O   HOH S 134     -39.341  23.299 -12.022  1.00 54.44           O  
HETATM  905  O   HOH S 135     -51.447   1.486   0.075  1.00 53.35           O  
HETATM  906  O   HOH S 136     -19.487  12.566   4.923  1.00 50.40           O  
HETATM  907  O   HOH S 137     -47.372  19.074   6.525  1.00 49.20           O  
HETATM  908  O   HOH S 138     -20.573  19.561   2.447  1.00 61.19           O  
HETATM  909  O   HOH S 139     -24.337  15.388   2.606  1.00 52.08           O  
HETATM  910  O   HOH S 140     -22.767  23.775   9.251  1.00 48.96           O  
HETATM  911  O   HOH S 141     -56.174  12.466  20.871  1.00 52.41           O  
HETATM  912  O   HOH S 142     -23.176  17.690   8.743  1.00 63.74           O  
HETATM  913  O   HOH S 143     -23.744  13.149   3.624  1.00 50.89           O  
HETATM  914  O   HOH S 144     -29.751   7.393   8.143  1.00 49.82           O  
HETATM  915  O   HOH S 145     -51.821  -0.069  -1.817  1.00 51.74           O  
HETATM  916  O   HOH S 146     -20.459  17.954   3.411  1.00 63.92           O  
HETATM  917  O   HOH S 147     -17.904  22.315  -0.221  1.00 64.06           O  
HETATM  918  O   HOH S 148     -36.692  12.725 -12.266  1.00 53.34           O  
HETATM  919  O   HOH S 149     -30.605  -4.786 -12.246  1.00 49.46           O  
HETATM  920  O   HOH S 150     -25.695   2.344  -7.610  1.00 51.78           O  
HETATM  921  O   HOH S 151     -43.105   6.070 -16.640  1.00 62.56           O  
HETATM  922  O   HOH S 152     -27.897  -4.971 -10.836  1.00 59.67           O  
HETATM  923  O   HOH S 153     -51.565  -1.565  -3.706  1.00 52.89           O  
HETATM  924  O   HOH S 154     -51.576  10.324  20.815  1.00 48.95           O  
HETATM  925  O   HOH S 155     -42.797  18.482  24.602  1.00 52.28           O  
HETATM  926  O   HOH S 156     -26.235   1.212  -5.457  1.00 64.43           O  
HETATM  927  O   HOH S 157     -24.010  19.651   5.526  1.00 59.10           O  
HETATM  928  O   HOH S 158     -31.453  16.884  -7.032  1.00 60.18           O  
HETATM  929  O   HOH S 159     -30.136   3.734  11.820  1.00 46.75           O  
HETATM  930  O   HOH S 160     -24.601  11.318   7.262  1.00 48.92           O  
HETATM  931  O   HOH S 161     -52.587   3.265  -0.560  1.00 50.51           O  
HETATM  932  O   HOH S 162     -24.484  24.764   7.953  1.00 50.68           O  
HETATM  933  O   HOH S 163     -23.735   6.640   2.147  1.00 55.08           O  
HETATM  934  O   HOH S 164     -27.858  14.972   6.656  1.00 46.78           O  
HETATM  935  O   HOH S 165     -48.159  -2.954  15.684  1.00 43.72           O  
HETATM  936  O   HOH S 166     -39.423  15.306  20.241  1.00 45.87           O  
HETATM  937  O   HOH S 167     -24.330  10.176   0.423  1.00 48.42           O  
HETATM  938  O   HOH S 168     -21.077  22.217   6.175  1.00 46.99           O  
HETATM  939  O   HOH S 169     -22.178   8.381   9.399  1.00 59.43           O  
HETATM  940  O   HOH S 170     -55.595  -2.025  -5.274  1.00 62.73           O  
HETATM  941  O   HOH S 171     -49.887   8.845  14.207  1.00 53.69           O  
HETATM  942  O   HOH S 172     -28.872  -2.381   4.371  1.00 52.19           O  
HETATM  943  O   HOH S 173     -55.967  -1.570  -8.134  1.00 62.84           O  
HETATM  944  O   HOH S 174     -24.468  12.332   1.895  1.00 52.29           O  
HETATM  945  O   HOH S 175     -44.643   5.298  21.517  1.00 59.92           O  
HETATM  946  O   HOH S 176     -24.158   3.062   6.193  1.00 56.53           O  
HETATM  947  O   HOH S 177     -46.941   4.275 -14.060  1.00 62.24           O  
HETATM  948  O   HOH S 178     -44.999  17.799  -9.592  1.00 61.01           O  
HETATM  949  O   HOH S 179     -22.979  10.546   6.557  1.00 57.90           O  
HETATM  950  O   HOH S 180     -50.650  -2.682  -1.855  1.00 53.67           O  
HETATM  951  O   HOH S 181     -20.010  -4.062  -2.271  1.00 63.30           O  
HETATM  952  O   HOH S 182     -26.231  10.980   2.725  1.00 57.19           O  
HETATM  953  O   HOH S 183     -40.757  21.802  21.032  1.00 52.53           O  
HETATM  954  O   HOH S 184     -22.366  23.754   6.664  1.00 52.70           O  
HETATM  955  O   HOH S 185     -17.620  16.874   9.928  1.00 53.72           O  
HETATM  956  O   HOH S 186     -57.095  17.909  15.719  1.00 66.16           O  
HETATM  957  O   HOH S 187     -18.783  16.026  11.426  1.00 60.58           O  
HETATM  958  O   HOH S 188     -27.693   7.144   4.736  1.00 63.94           O  
HETATM  959  O   HOH S 189     -20.786  -1.938  -2.943  1.00 59.68           O  
HETATM  960  O   HOH S 190     -43.043  22.334  -8.650  1.00 59.07           O  
HETATM  961  O   HOH S 191     -25.465  21.189   5.027  1.00 65.25           O  
HETATM  962  O   HOH S 192     -53.854   8.137   8.008  1.00 63.56           O  
HETATM  963  O   HOH S 193     -19.418  12.080  -1.978  1.00 59.25           O  
HETATM  964  O   HOH S 194     -52.457   8.480  10.862  1.00 62.76           O  
HETATM  965  O   HOH S 195     -41.186  21.432   4.131  1.00 57.64           O  
END
