# Supplementary material
Source: publisher figshare collection journal article supplement (https://plos.figshare.com/articles/dataset/_/11411415)
Supplement: Supplementary file 1 [file 1 › pone.0226693.s020.pdb]

HEADER    TRANSFERASE                             04-DEC-10   3PUC              
TITLE     ATOMIC RESOLUTION STRUCTURE OF TITIN DOMAIN M7                        
COMPND    MOL_ID: 1;                                                            
COMPND   2 MOLECULE: TITIN;                                                     
COMPND   3 CHAIN: A;                                                            
COMPND   4 FRAGMENT: DOMAIN M7 (UNP RESIDUES 33774-33871);                      
COMPND   5 SYNONYM: CONNECTIN, RHABDOMYOSARCOMA ANTIGEN MU-RMS-40.14;           
COMPND   6 EC: 2.7.11.1;                                                        
COMPND   7 ENGINEERED: YES                                                      
SOURCE    MOL_ID: 1;                                                            
SOURCE   2 ORGANISM_SCIENTIFIC: HOMO SAPIENS;                                   
SOURCE   3 ORGANISM_COMMON: HUMAN;                                              
SOURCE   4 ORGANISM_TAXID: 9606;                                                
SOURCE   5 GENE: TTN;                                                           
SOURCE   6 EXPRESSION_SYSTEM: ESCHERICHIA COLI;                                 
SOURCE   7 EXPRESSION_SYSTEM_TAXID: 562;                                        
SOURCE   8 EXPRESSION_SYSTEM_STRAIN: BL21 STAR PRARE2;                          
SOURCE   9 EXPRESSION_SYSTEM_VECTOR_TYPE: PLASMID;                              
SOURCE  10 EXPRESSION_SYSTEM_PLASMID: PETM14                                    
KEYWDS    I-SET IG-LIKE DOMAIN, M-BAND, TRANSFERASE                             
EXPDTA    X-RAY DIFFRACTION                                                     
AUTHOR    F.SAUER,M.WILMANNS                                                    
REVDAT   2   28-SEP-16 3PUC    1       REMARK                                   
REVDAT   1   21-DEC-11 3PUC    0                                                
JRNL        AUTH   F.SAUER,M.WILMANNS                                           
JRNL        TITL   STRUCTURE OF TITIN M7                                        
JRNL        REF    TO BE PUBLISHED                                              
JRNL        REFN                                                                
REMARK   2                                                                      
REMARK   2 RESOLUTION.    0.96 ANGSTROMS.                                       
REMARK   3                                                                      
REMARK   3 REFINEMENT.                                                          
REMARK   3   PROGRAM     : PHENIX (PHENIX.REFINE: 1.6.4_486)                    
REMARK   3   AUTHORS     : PAUL ADAMS,PAVEL AFONINE,VINCENT CHEN,IAN            
REMARK   3               : DAVIS,KRESHNA GOPAL,RALF GROSSE-                     
REMARK   3               : KUNSTLEVE,LI-WEI HUNG,ROBERT IMMORMINO,              
REMARK   3               : TOM IOERGER,AIRLIE MCCOY,ERIK MCKEE,NIGEL            
REMARK   3               : MORIARTY,REETAL PAI,RANDY READ,JANE                  
REMARK   3               : RICHARDSON,DAVID RICHARDSON,TOD ROMO,JIM             
REMARK   3               : SACCHETTINI,NICHOLAS SAUTER,JACOB SMITH,             
REMARK   3               : LAURENT STORONI,TOM TERWILLIGER,PETER                
REMARK   3               : ZWART                                                
REMARK   3                                                                      
REMARK   3    REFINEMENT TARGET : ML                                            
REMARK   3                                                                      
REMARK   3  DATA USED IN REFINEMENT.                                            
REMARK   3   RESOLUTION RANGE HIGH (ANGSTROMS) : 0.96                           
REMARK   3   RESOLUTION RANGE LOW  (ANGSTROMS) : 19.52                          
REMARK   3   MIN(FOBS/SIGMA_FOBS)              : 0.780                          
REMARK   3   COMPLETENESS FOR RANGE        (%) : 99.7                           
REMARK   3   NUMBER OF REFLECTIONS             : 44284                          
REMARK   3                                                                      
REMARK   3  FIT TO DATA USED IN REFINEMENT.                                     
REMARK   3   R VALUE     (WORKING + TEST SET) : 0.116                           
REMARK   3   R VALUE            (WORKING SET) : 0.116                           
REMARK   3   FREE R VALUE                     : 0.135                           
REMARK   3   FREE R VALUE TEST SET SIZE   (%) : 4.510                           
REMARK   3   FREE R VALUE TEST SET COUNT      : 1998                            
REMARK   3                                                                      
REMARK   3  FIT TO DATA USED IN REFINEMENT (IN BINS).                           
REMARK   3   BIN  RESOLUTION RANGE  COMPL.    NWORK NFREE   RWORK  RFREE        
REMARK   3     1 19.5223 -  2.0677    1.00     4282   204  0.1266 0.1329        
REMARK   3     2  2.0677 -  1.6414    0.99     4238   199  0.1071 0.1326        
REMARK   3     3  1.6414 -  1.4340    0.99     4221   193  0.1073 0.1406        
REMARK   3     4  1.4340 -  1.3029    0.99     4226   198  0.1029 0.1298        
REMARK   3     5  1.3029 -  1.2096    1.00     4180   203  0.0960 0.1235        
REMARK   3     6  1.2096 -  1.1383    1.00     4244   207  0.1022 0.1254        
REMARK   3     7  1.1383 -  1.0813    1.00     4239   195  0.1055 0.1327        
REMARK   3     8  1.0813 -  1.0342    1.00     4201   205  0.1161 0.1613        
REMARK   3     9  1.0342 -  0.9944    1.00     4222   195  0.1335 0.1414        
REMARK   3    10  0.9944 -  0.9601    1.00     4233   199  0.1633 0.1807        
REMARK   3                                                                      
REMARK   3  BULK SOLVENT MODELLING.                                             
REMARK   3   METHOD USED        : FLAT BULK SOLVENT MODEL                       
REMARK   3   SOLVENT RADIUS     : 0.10                                          
REMARK   3   SHRINKAGE RADIUS   : 0.00                                          
REMARK   3   K_SOL              : 0.60                                          
REMARK   3   B_SOL              : 113.18                                        
REMARK   3                                                                      
REMARK   3  ERROR ESTIMATES.                                                    
REMARK   3   COORDINATE ERROR (MAXIMUM-LIKELIHOOD BASED)     : 0.060            
REMARK   3   PHASE ERROR (DEGREES, MAXIMUM-LIKELIHOOD BASED) : NULL             
REMARK   3                                                                      
REMARK   3  B VALUES.                                                           
REMARK   3   FROM WILSON PLOT           (A**2) : 10.09                          
REMARK   3   MEAN B VALUE      (OVERALL, A**2) : 12.43                          
REMARK   3   OVERALL ANISOTROPIC B VALUE.                                       
REMARK   3    B11 (A**2) : -0.45630                                             
REMARK   3    B22 (A**2) : 2.29920                                              
REMARK   3    B33 (A**2) : -1.84300                                             
REMARK   3    B12 (A**2) : -0.00000                                             
REMARK   3    B13 (A**2) : 1.79950                                              
REMARK   3    B23 (A**2) : 0.00000                                              
REMARK   3                                                                      
REMARK   3  TWINNING INFORMATION.                                               
REMARK   3   FRACTION: NULL                                                     
REMARK   3   OPERATOR: NULL                                                     
REMARK   3                                                                      
REMARK   3  DEVIATIONS FROM IDEAL VALUES.                                       
REMARK   3                 RMSD          COUNT                                  
REMARK   3   BOND      :  0.012            832                                  
REMARK   3   ANGLE     :  1.451           1146                                  
REMARK   3   CHIRALITY :  0.082            135                                  
REMARK   3   PLANARITY :  0.008            146                                  
REMARK   3   DIHEDRAL  : 10.696            304                                  
REMARK   3                                                                      
REMARK   3  TLS DETAILS                                                         
REMARK   3   NUMBER OF TLS GROUPS  : NULL                                       
REMARK   3                                                                      
REMARK   3  NCS DETAILS                                                         
REMARK   3   NUMBER OF NCS GROUPS : NULL                                        
REMARK   3                                                                      
REMARK   3  OTHER REFINEMENT REMARKS: NULL                                      
REMARK   4                                                                      
REMARK   4 3PUC COMPLIES WITH FORMAT V. 3.30, 13-JUL-11                         
REMARK 100                                                                      
REMARK 100 THIS ENTRY HAS BEEN PROCESSED BY PDBJ ON 16-DEC-10.                  
REMARK 100 THE RCSB ID CODE IS RCSB062821.                                      
REMARK 200                                                                      
REMARK 200 EXPERIMENTAL DETAILS                                                 
REMARK 200  EXPERIMENT TYPE                : X-RAY DIFFRACTION                  
REMARK 200  DATE OF DATA COLLECTION        : 15-JUL-10                          
REMARK 200  TEMPERATURE           (KELVIN) : 100                                
REMARK 200  PH                             : 8.0                                
REMARK 200  NUMBER OF CRYSTALS USED        : 1                                  
REMARK 200                                                                      
REMARK 200  SYNCHROTRON              (Y/N) : Y                                  
REMARK 200  RADIATION SOURCE               : EMBL/DESY, HAMBURG                 
REMARK 200  BEAMLINE                       : X12                                
REMARK 200  X-RAY GENERATOR MODEL          : NULL                               
REMARK 200  MONOCHROMATIC OR LAUE    (M/L) : M                                  
REMARK 200  WAVELENGTH OR RANGE        (A) : 0.82653                            
REMARK 200  MONOCHROMATOR                  : DOUBLE CRYSTAL SI(111)             
REMARK 200  OPTICS                         : NULL                               
REMARK 200                                                                      
REMARK 200  DETECTOR TYPE                  : CCD                                
REMARK 200  DETECTOR MANUFACTURER          : MARMOSAIC 225 MM CCD               
REMARK 200  INTENSITY-INTEGRATION SOFTWARE : XDS                                
REMARK 200  DATA SCALING SOFTWARE          : XSCALE                             
REMARK 200                                                                      
REMARK 200  NUMBER OF UNIQUE REFLECTIONS   : 44303                              
REMARK 200  RESOLUTION RANGE HIGH      (A) : 0.960                              
REMARK 200  RESOLUTION RANGE LOW       (A) : 30.000                             
REMARK 200  REJECTION CRITERIA  (SIGMA(I)) : -3.000                             
REMARK 200                                                                      
REMARK 200 OVERALL.                                                             
REMARK 200  COMPLETENESS FOR RANGE     (%) : 99.7                               
REMARK 200  DATA REDUNDANCY                : 3.980                              
REMARK 200  R MERGE                    (I) : 0.05600                            
REMARK 200  R SYM                      (I) : NULL                               
REMARK 200  <I/SIGMA(I)> FOR THE DATA SET  : 14.3800                            
REMARK 200                                                                      
REMARK 200 IN THE HIGHEST RESOLUTION SHELL.                                     
REMARK 200  HIGHEST RESOLUTION SHELL, RANGE HIGH (A) : 0.96                     
REMARK 200  HIGHEST RESOLUTION SHELL, RANGE LOW  (A) : 0.98                     
REMARK 200  COMPLETENESS FOR SHELL     (%) : 100.0                              
REMARK 200  DATA REDUNDANCY IN SHELL       : NULL                               
REMARK 200  R MERGE FOR SHELL          (I) : 0.39700                            
REMARK 200  R SYM FOR SHELL            (I) : NULL                               
REMARK 200  <I/SIGMA(I)> FOR SHELL         : 4.100                              
REMARK 200                                                                      
REMARK 200 DIFFRACTION PROTOCOL: SINGLE WAVELENGTH                              
REMARK 200 METHOD USED TO DETERMINE THE STRUCTURE: MOLECULAR REPLACEMENT        
REMARK 200 SOFTWARE USED: PHASER                                                
REMARK 200 STARTING MODEL: PDB ENTRY 3KNB                                       
REMARK 200                                                                      
REMARK 200 REMARK: NULL                                                         
REMARK 280                                                                      
REMARK 280 CRYSTAL                                                              
REMARK 280 SOLVENT CONTENT, VS   (%): 31.65                                     
REMARK 280 MATTHEWS COEFFICIENT, VM (ANGSTROMS**3/DA): 1.80                     
REMARK 280                                                                      
REMARK 280 CRYSTALLIZATION CONDITIONS: 0.1M TRIS PH 8.0, 3.2M AMMONIUM          
REMARK 280  SULFATE, 1MM TCEP, VAPOR DIFFUSION, HANGING DROP, TEMPERATURE 293K  
REMARK 290                                                                      
REMARK 290 CRYSTALLOGRAPHIC SYMMETRY                                            
REMARK 290 SYMMETRY OPERATORS FOR SPACE GROUP: P 1 21 1                         
REMARK 290                                                                      
REMARK 290      SYMOP   SYMMETRY                                                
REMARK 290     NNNMMM   OPERATOR                                                
REMARK 290       1555   X,Y,Z                                                   
REMARK 290       2555   -X,Y+1/2,-Z                                             
REMARK 290                                                                      
REMARK 290     WHERE NNN -> OPERATOR NUMBER                                     
REMARK 290           MMM -> TRANSLATION VECTOR                                  
REMARK 290                                                                      
REMARK 290 CRYSTALLOGRAPHIC SYMMETRY TRANSFORMATIONS                            
REMARK 290 THE FOLLOWING TRANSFORMATIONS OPERATE ON THE ATOM/HETATM             
REMARK 290 RECORDS IN THIS ENTRY TO PRODUCE CRYSTALLOGRAPHICALLY                
REMARK 290 RELATED MOLECULES.                                                   
REMARK 290   SMTRY1   1  1.000000  0.000000  0.000000        0.00000            
REMARK 290   SMTRY2   1  0.000000  1.000000  0.000000        0.00000            
REMARK 290   SMTRY3   1  0.000000  0.000000  1.000000        0.00000            
REMARK 290   SMTRY1   2 -1.000000  0.000000  0.000000        0.00000            
REMARK 290   SMTRY2   2  0.000000  1.000000  0.000000       34.28500            
REMARK 290   SMTRY3   2  0.000000  0.000000 -1.000000        0.00000            
REMARK 290                                                                      
REMARK 290 REMARK: NULL                                                         
REMARK 300                                                                      
REMARK 300 BIOMOLECULE: 1                                                       
REMARK 300 SEE REMARK 350 FOR THE AUTHOR PROVIDED AND/OR PROGRAM                
REMARK 300 GENERATED ASSEMBLY INFORMATION FOR THE STRUCTURE IN                  
REMARK 300 THIS ENTRY. THE REMARK MAY ALSO PROVIDE INFORMATION ON               
REMARK 300 BURIED SURFACE AREA.                                                 
REMARK 350                                                                      
REMARK 350 COORDINATES FOR A COMPLETE MULTIMER REPRESENTING THE KNOWN           
REMARK 350 BIOLOGICALLY SIGNIFICANT OLIGOMERIZATION STATE OF THE                
REMARK 350 MOLECULE CAN BE GENERATED BY APPLYING BIOMT TRANSFORMATIONS          
REMARK 350 GIVEN BELOW.  BOTH NON-CRYSTALLOGRAPHIC AND                          
REMARK 350 CRYSTALLOGRAPHIC OPERATIONS ARE GIVEN.                               
REMARK 350                                                                      
REMARK 350 BIOMOLECULE: 1                                                       
REMARK 350 AUTHOR DETERMINED BIOLOGICAL UNIT: MONOMERIC                         
REMARK 350 SOFTWARE DETERMINED QUATERNARY STRUCTURE: MONOMERIC                  
REMARK 350 SOFTWARE USED: PISA                                                  
REMARK 350 APPLY THE FOLLOWING TO CHAINS: A                                     
REMARK 350   BIOMT1   1  1.000000  0.000000  0.000000        0.00000            
REMARK 350   BIOMT2   1  0.000000  1.000000  0.000000        0.00000            
REMARK 350   BIOMT3   1  0.000000  0.000000  1.000000        0.00000            
REMARK 465                                                                      
REMARK 465 MISSING RESIDUES                                                     
REMARK 465 THE FOLLOWING RESIDUES WERE NOT LOCATED IN THE                       
REMARK 465 EXPERIMENT. (M=MODEL NUMBER; RES=RESIDUE NAME; C=CHAIN               
REMARK 465 IDENTIFIER; SSSEQ=SEQUENCE NUMBER; I=INSERTION CODE.)                
REMARK 465                                                                      
REMARK 465   M RES C SSSEQI                                                     
REMARK 465     ILE A    99                                                      
REMARK 470                                                                      
REMARK 470 MISSING ATOM                                                         
REMARK 470 THE FOLLOWING RESIDUES HAVE MISSING ATOMS (M=MODEL NUMBER;           
REMARK 470 RES=RESIDUE NAME; C=CHAIN IDENTIFIER; SSEQ=SEQUENCE NUMBER;          
REMARK 470 I=INSERTION CODE):                                                   
REMARK 470   M RES CSSEQI  ATOMS                                                
REMARK 470     ARG A  35    CD   NE   CZ   NH1  NH2                             
REMARK 470     LYS A  59    CG   CD   CE   NZ                                   
REMARK 500                                                                      
REMARK 500 GEOMETRY AND STEREOCHEMISTRY                                         
REMARK 500 SUBTOPIC: CLOSE CONTACTS IN SAME ASYMMETRIC UNIT                     
REMARK 500                                                                      
REMARK 500 THE FOLLOWING ATOMS ARE IN CLOSE CONTACT.                            
REMARK 500                                                                      
REMARK 500  ATM1  RES C  SSEQI   ATM2  RES C  SSEQI           DISTANCE          
REMARK 500   O    HOH A   149     O    HOH A   150              2.17            
REMARK 500                                                                      
REMARK 500 REMARK: NULL                                                         
REMARK 800                                                                      
REMARK 800 SITE                                                                 
REMARK 800 SITE_IDENTIFIER: AC1                                                 
REMARK 800 EVIDENCE_CODE: SOFTWARE                                              
REMARK 800 SITE_DESCRIPTION: BINDING SITE FOR RESIDUE SO4 A 100                 
REMARK 800                                                                      
REMARK 800 SITE_IDENTIFIER: AC2                                                 
REMARK 800 EVIDENCE_CODE: SOFTWARE                                              
REMARK 800 SITE_DESCRIPTION: BINDING SITE FOR RESIDUE SO4 A 101                 
REMARK 900                                                                      
REMARK 900 RELATED ENTRIES                                                      
REMARK 900 RELATED ID: 3KNB   RELATED DB: PDB                                   
REMARK 900 RELATED ID: 2BK8   RELATED DB: PDB                                   
DBREF  3PUC A    2    99  UNP    Q8WZ42   TITIN_HUMAN  33774  33871             
SEQADV 3PUC GLY A    1  UNP  Q8WZ42              EXPRESSION TAG                 
SEQRES   1 A   99  GLY PRO ILE SER SER LYS PRO VAL ILE VAL THR GLY LEU          
SEQRES   2 A   99  GLN ASP THR THR VAL SER SER ASP SER VAL ALA LYS PHE          
SEQRES   3 A   99  ALA VAL LYS ALA THR GLY GLU PRO ARG PRO THR ALA ILE          
SEQRES   4 A   99  TRP THR LYS ASP GLY LYS ALA ILE THR GLN GLY GLY LYS          
SEQRES   5 A   99  TYR LYS LEU SER GLU ASP LYS GLY GLY PHE PHE LEU GLU          
SEQRES   6 A   99  ILE HIS LYS THR ASP THR SER ASP SER GLY LEU TYR THR          
SEQRES   7 A   99  CYS THR VAL LYS ASN SER ALA GLY SER VAL SER SER SER          
SEQRES   8 A   99  CYS LYS LEU THR ILE LYS ALA ILE                              
HET    SO4  A 100       5                                                       
HET    SO4  A 101       5                                                       
HETNAM     SO4 SULFATE ION                                                      
FORMUL   2  SO4    2(O4 S 2-)                                                   
FORMUL   4  HOH   *160(H2 O)                                                    
HELIX    1   1 ASP A   70  SER A   74  5                                   5    
SHEET    1   A 4 SER A   5  THR A  11  0                                        
SHEET    2   A 4 ALA A  24  GLU A  33 -1  O  LYS A  29   N  VAL A  10           
SHEET    3   A 4 GLY A  61  ILE A  66 -1  O  ILE A  66   N  ALA A  24           
SHEET    4   A 4 TYR A  53  ASP A  58 -1  N  SER A  56   O  PHE A  63           
SHEET    1   B 5 THR A  16  SER A  19  0                                        
SHEET    2   B 5 GLY A  86  LYS A  97  1  O  THR A  95   N  THR A  16           
SHEET    3   B 5 GLY A  75  ASN A  83 -1  N  VAL A  81   O  VAL A  88           
SHEET    4   B 5 THR A  37  LYS A  42 -1  N  THR A  37   O  LYS A  82           
SHEET    5   B 5 LYS A  45  ALA A  46 -1  O  LYS A  45   N  LYS A  42           
CISPEP   1 GLU A   33    PRO A   34          0        -4.32                     
SITE     1 AC1  2 GLY A   1  HOH A 236                                          
SITE     1 AC2  9 LYS A  29  ILE A  47  THR A  48  GLN A  49                    
SITE     2 AC2  9 LEU A  55  HOH A 130  HOH A 242  HOH A 248                    
SITE     3 AC2  9 HOH A 250                                                     
CRYST1   22.830   68.570   24.180  90.00 100.94  90.00 P 1 21 1      2          
ORIGX1      1.000000  0.000000  0.000000        0.00000                         
ORIGX2      0.000000  1.000000  0.000000        0.00000                         
ORIGX3      0.000000  0.000000  1.000000        0.00000                         
SCALE1      0.043802  0.000000  0.008463        0.00000                         
SCALE2      0.000000  0.014584  0.000000        0.00000                         
SCALE3      0.000000  0.000000  0.042121        0.00000                         
ATOM      1  N   GLY A   1       7.191 -28.730  28.116  1.00 28.07           N  
ANISOU    1  N   GLY A   1     3463   3615   3588    933  -1193   1557       N  
ATOM      2  CA  GLY A   1       6.568 -29.027  26.791  1.00 17.56           C  
ANISOU    2  CA  GLY A   1     1699   2396   2575    520    -91    890       C  
ATOM      3  C   GLY A   1       6.877 -27.909  25.809  1.00 11.59           C  
ANISOU    3  C   GLY A   1     1340   1344   1719     60   -436    179       C  
ATOM      4  O   GLY A   1       7.417 -26.890  26.180  1.00 13.50           O  
ANISOU    4  O   GLY A   1     1554   1178   2399    -93   -564    113       O  
ATOM      5  H1  GLY A   1       6.945 -29.413  28.745  1.00 33.69           H  
ATOM      6  H2  GLY A   1       8.146 -28.709  28.023  1.00 33.69           H  
ATOM      7  H3  GLY A   1       6.881 -27.878  28.432  1.00 33.69           H  
ATOM      8  HA2 GLY A   1       6.918 -29.860  26.440  1.00 21.07           H  
ATOM      9  HA3 GLY A   1       5.606 -29.104  26.887  1.00 21.07           H  
ATOM     10  N   PRO A   2       6.538 -28.090  24.532  1.00 11.29           N  
ANISOU   10  N   PRO A   2     1044    946   2299   -163     23    150       N  
ATOM     11  CA  PRO A   2       6.697 -27.009  23.568  1.00 10.38           C  
ANISOU   11  CA  PRO A   2      904   1135   1906   -121    -57     91       C  
ATOM     12  C   PRO A   2       5.845 -25.829  23.944  1.00  9.94           C  
ANISOU   12  C   PRO A   2      757    879   2143    -73    -75    244       C  
ATOM     13  O   PRO A   2       4.750 -25.981  24.508  1.00 11.64           O  
ANISOU   13  O   PRO A   2     1004    950   2466     51    350    418       O  
ATOM     14  CB  PRO A   2       6.216 -27.644  22.250  1.00 13.15           C  
ANISOU   14  CB  PRO A   2     1759   1659   1576   -247      5    -40       C  
ATOM     15  CG  PRO A   2       5.356 -28.779  22.654  1.00 16.44           C  
ANISOU   15  CG  PRO A   2     2330   1893   2024   -504      8   -150       C  
ATOM     16  CD  PRO A   2       5.874 -29.266  23.957  1.00 14.13           C  
ANISOU   16  CD  PRO A   2     1461   1551   2358   -216   -304    -29       C  
ATOM     17  HA  PRO A   2       7.636 -26.739  23.490  1.00 12.46           H  
ATOM     18  HB2 PRO A   2       5.708 -26.993  21.741  1.00 15.78           H  
ATOM     19  HB3 PRO A   2       6.980 -27.957  21.741  1.00 15.78           H  
ATOM     20  HG2 PRO A   2       4.441 -28.472  22.748  1.00 19.73           H  
ATOM     21  HG3 PRO A   2       5.412 -29.479  21.985  1.00 19.73           H  
ATOM     22  HD2 PRO A   2       5.142 -29.552  24.526  1.00 16.96           H  
ATOM     23  HD3 PRO A   2       6.515 -29.981  23.819  1.00 16.96           H  
ATOM     24  N   ILE A   3       6.320 -24.641  23.597  1.00  8.68           N  
ANISOU   24  N   ILE A   3      810    920   1569    120     -5    271       N  
ATOM     25  CA  ILE A   3       5.612 -23.430  23.891  1.00  9.92           C  
ANISOU   25  CA  ILE A   3     1010   1101   1658    271    154    327       C  
ATOM     26  C   ILE A   3       5.477 -22.570  22.676  1.00  8.29           C  
ANISOU   26  C   ILE A   3      831    903   1417    178     66    196       C  
ATOM     27  O   ILE A   3       6.160 -22.750  21.665  1.00  9.85           O  
ANISOU   27  O   ILE A   3     1326    957   1458    292    154     51       O  
ATOM     28  CB  ILE A   3       6.295 -22.603  25.017  1.00 12.64           C  
ANISOU   28  CB  ILE A   3     1661   1525   1615    384    343     64       C  
ATOM     29  CG1 ILE A   3       7.717 -22.211  24.603  1.00 13.15           C  
ANISOU   29  CG1 ILE A   3     1382   1817   1796    263   -251   -586       C  
ATOM     30  CG2 ILE A   3       6.294 -23.375  26.319  1.00 17.88           C  
ANISOU   30  CG2 ILE A   3     2713   2211   1871    563    661    322       C  
ATOM     31  CD1 ILE A   3       8.418 -21.257  25.555  1.00 19.71           C  
ANISOU   31  CD1 ILE A   3     2351   2537   2599    516   -813  -1218       C  
ATOM     32  H   ILE A   3       7.064 -24.519  23.185  1.00 10.42           H  
ATOM     33  HA  ILE A   3       4.710 -23.660  24.195  1.00 11.91           H  
ATOM     34  HB  ILE A   3       5.783 -21.790  25.148  1.00 15.16           H  
ATOM     35 HG12 ILE A   3       8.255 -23.016  24.546  1.00 15.78           H  
ATOM     36 HG13 ILE A   3       7.678 -21.782  23.734  1.00 15.78           H  
ATOM     37 HG21 ILE A   3       6.720 -22.845  26.997  1.00 21.46           H  
ATOM     38 HG22 ILE A   3       5.386 -23.561  26.571  1.00 21.46           H  
ATOM     39 HG23 ILE A   3       6.774 -24.197  26.196  1.00 21.46           H  
ATOM     40 HD11 ILE A   3       9.297 -21.068  25.217  1.00 23.65           H  
ATOM     41 HD12 ILE A   3       7.909 -20.445  25.615  1.00 23.65           H  
ATOM     42 HD13 ILE A   3       8.481 -21.668  26.420  1.00 23.65           H  
ATOM     43  N  ASER A   4       4.574 -21.612  22.782  0.60  8.96           N  
ANISOU   43  N  ASER A   4      948    708   1747    222    451    376       N  
ATOM     44  N  BSER A   4       4.579 -21.607  22.792  0.40 10.77           N  
ANISOU   44  N  BSER A   4     1271   1287   1534    349    228    289       N  
ATOM     45  CA ASER A   4       4.447 -20.574  21.797  0.60  8.10           C  
ANISOU   45  CA ASER A   4      853    670   1555     61    192    365       C  
ATOM     46  CA BSER A   4       4.464 -20.569  21.804  0.40 12.39           C  
ANISOU   46  CA BSER A   4     1644   1478   1584    355    139    158       C  
ATOM     47  C  ASER A   4       5.034 -19.290  22.340  0.60  9.68           C  
ANISOU   47  C  ASER A   4     1504    615   1559     90    236    339       C  
ATOM     48  C  BSER A   4       5.240 -19.354  22.298  0.40  8.45           C  
ANISOU   48  C  BSER A   4     1224    911   1073    193     59    114       C  
ATOM     49  O  ASER A   4       5.189 -19.139  23.553  0.60 11.77           O  
ANISOU   49  O  ASER A   4     2359    763   1350    283    404    287       O  
ATOM     50  O  BSER A   4       5.782 -19.336  23.411  0.40  7.86           O  
ANISOU   50  O  BSER A   4     1396    767    824    207   -143    138       O  
ATOM     51  CB ASER A   4       2.995 -20.367  21.419  0.60  9.33           C  
ANISOU   51  CB ASER A   4     1022    924   1597     61    229    173       C  
ATOM     52  CB BSER A   4       2.993 -20.227  21.545  0.40 16.91           C  
ANISOU   52  CB BSER A   4     2022   2004   2400    442    252    356       C  
ATOM     53  OG ASER A   4       2.508 -21.554  20.836  0.60 10.73           O  
ANISOU   53  OG ASER A   4     1219    992   1865    -28    105    237       O  
ATOM     54  OG BSER A   4       2.320 -19.870  22.739  0.40 14.25           O  
ANISOU   54  OG BSER A   4     1343   1770   2302    593    570    638       O  
ATOM     55  H  ASER A   4       4.014 -21.545  23.432  0.60 10.75           H  
ATOM     56  H  BSER A   4       4.021 -21.538  23.442  0.40 12.92           H  
ATOM     57  HA ASER A   4       4.944 -20.827  20.992  0.60  9.72           H  
ATOM     58  HA BSER A   4       4.864 -20.873  20.963  0.40 14.87           H  
ATOM     59  HB2ASER A   4       2.480 -20.163  22.216  0.60 11.19           H  
ATOM     60  HB2BSER A   4       2.950 -19.482  20.926  0.40 20.29           H  
ATOM     61  HB3ASER A   4       2.929 -19.641  20.779  0.60 11.19           H  
ATOM     62  HB3BSER A   4       2.555 -21.002  21.159  0.40 20.29           H  
ATOM     63  HG ASER A   4       1.721 -21.460  20.624  0.60 12.87           H  
ATOM     64  HG BSER A   4       1.537 -19.691  22.577  0.40 17.10           H  
ATOM     65  N   SER A   5       5.317 -18.343  21.449  1.00  7.84           N  
ANISOU   65  N   SER A   5     1111    788   1078     -5   -104    210       N  
ATOM     66  CA  SER A   5       5.887 -17.081  21.848  1.00  7.81           C  
ANISOU   66  CA  SER A   5     1141    773   1055      4   -259    166       C  
ATOM     67  C   SER A   5       5.211 -15.946  21.110  1.00  7.34           C  
ANISOU   67  C   SER A   5     1122    599   1067     28   -259    184       C  
ATOM     68  O   SER A   5       5.058 -15.967  19.903  1.00  7.97           O  
ANISOU   68  O   SER A   5     1406    648    975    -90   -305    159       O  
ATOM     69  CB  SER A   5       7.391 -17.067  21.640  1.00 10.35           C  
ANISOU   69  CB  SER A   5     1286   1143   1502     26   -141     44       C  
ATOM     70  OG  SER A   5       7.709 -17.174  20.295  1.00 11.02           O  
ANISOU   70  OG  SER A   5     1289   1204   1696     26     48      1       O  
ATOM     71  H  ASER A   5       5.183 -18.417  20.602  0.58  9.41           H  
ATOM     72  H  BSER A   5       5.044 -18.368  20.633  0.42  9.41           H  
ATOM     73  HA  SER A   5       5.720 -16.953  22.805  1.00  9.38           H  
ATOM     74  HB2 SER A   5       7.748 -16.233  21.983  1.00 12.42           H  
ATOM     75  HB3 SER A   5       7.782 -17.815  22.117  1.00 12.42           H  
ATOM     76  HG  SER A   5       8.523 -17.165  20.198  1.00 13.23           H  
ATOM     77  N   LYS A   6       4.812 -14.951  21.867  1.00  6.98           N  
ANISOU   77  N   LYS A   6     1116    603    932     24   -208     41       N  
ATOM     78  CA  LYS A   6       4.253 -13.722  21.331  1.00  7.17           C  
ANISOU   78  CA  LYS A   6     1122    668    935    -85   -182    146       C  
ATOM     79  C   LYS A   6       5.245 -13.141  20.326  1.00  6.28           C  
ANISOU   79  C   LYS A   6      916    552    918     -2   -283     -1       C  
ATOM     80  O   LYS A   6       6.448 -13.128  20.583  1.00  6.63           O  
ANISOU   80  O   LYS A   6      925    643    951    -74   -338    140       O  
ATOM     81  CB  LYS A   6       4.009 -12.729  22.469  1.00  8.37           C  
ANISOU   81  CB  LYS A   6     1176    905   1100    -66    -40     82       C  
ATOM     82  CG  LYS A   6       3.472 -11.373  22.076  1.00  8.38           C  
ANISOU   82  CG  LYS A   6     1059   1008   1117    -78    -11    -69       C  
ATOM     83  CD  LYS A   6       3.581 -10.363  23.222  1.00  8.64           C  
ANISOU   83  CD  LYS A   6     1010   1146   1127   -210     57   -224       C  
ATOM     84  CE  LYS A   6       4.353  -9.109  22.875  1.00 10.45           C  
ANISOU   84  CE  LYS A   6     1234   1449   1287   -264   -131   -345       C  
ATOM     85  NZ  LYS A   6       5.700  -9.338  22.444  1.00 11.44           N  
ANISOU   85  NZ  LYS A   6     1459   1636   1252   -674    181   -271       N  
ATOM     86  H   LYS A   6       4.855 -14.960  22.726  1.00  8.37           H  
ATOM     87  HA  LYS A   6       3.404 -13.907  20.877  1.00  8.60           H  
ATOM     88  HB2 LYS A   6       3.371 -13.123  23.085  1.00 10.05           H  
ATOM     89  HB3 LYS A   6       4.850 -12.582  22.929  1.00 10.05           H  
ATOM     90  HG2 LYS A   6       3.982 -11.034  21.324  1.00 10.05           H  
ATOM     91  HG3 LYS A   6       2.537 -11.459  21.835  1.00 10.05           H  
ATOM     92  HD2 LYS A   6       2.686 -10.095  23.486  1.00 10.37           H  
ATOM     93  HD3 LYS A   6       4.029 -10.788  23.970  1.00 10.37           H  
ATOM     94  HE2 LYS A   6       3.889  -8.648  22.158  1.00 12.54           H  
ATOM     95  HE3 LYS A   6       4.388  -8.539  23.659  1.00 12.54           H  
ATOM     96  HZ1 LYS A   6       6.095  -8.562  22.257  1.00 13.73           H  
ATOM     97  HZ2 LYS A   6       6.158  -9.749  23.086  1.00 13.73           H  
ATOM     98  HZ3 LYS A   6       5.703  -9.848  21.715  1.00 13.73           H  
ATOM     99  N   PRO A   7       4.761 -12.596  19.215  1.00  6.02           N  
ANISOU   99  N   PRO A   7      884    578    825   -111   -209     52       N  
ATOM    100  CA  PRO A   7       5.689 -11.978  18.263  1.00  6.25           C  
ANISOU  100  CA  PRO A   7      998    671    706   -268   -238     29       C  
ATOM    101  C   PRO A   7       6.485 -10.842  18.879  1.00  6.13           C  
ANISOU  101  C   PRO A   7      874    697    759   -220   -234    128       C  
ATOM    102  O   PRO A   7       6.020 -10.139  19.793  1.00  6.63           O  
ANISOU  102  O   PRO A   7     1117    577    825   -169   -287     23       O  
ATOM    103  CB  PRO A   7       4.769 -11.483  17.140  1.00  7.23           C  
ANISOU  103  CB  PRO A   7     1124    865    760   -282   -470     12       C  
ATOM    104  CG  PRO A   7       3.571 -12.385  17.236  1.00  7.07           C  
ANISOU  104  CG  PRO A   7      966    840    882   -133   -359     56       C  
ATOM    105  CD  PRO A   7       3.375 -12.578  18.724  1.00  6.50           C  
ANISOU  105  CD  PRO A   7      761    748    959   -103   -298      0       C  
ATOM    106  HA  PRO A   7       6.306 -12.650  17.905  1.00  7.50           H  
ATOM    107  HB2 PRO A   7       4.521 -10.559  17.298  1.00  8.68           H  
ATOM    108  HB3 PRO A   7       5.211 -11.583  16.282  1.00  8.68           H  
ATOM    109  HG2 PRO A   7       2.800 -11.953  16.839  1.00  8.49           H  
ATOM    110  HG3 PRO A   7       3.759 -13.231  16.800  1.00  8.49           H  
ATOM    111  HD2 PRO A   7       2.887 -11.830  19.105  1.00  7.80           H  
ATOM    112  HD3 PRO A   7       2.937 -13.424  18.905  1.00  7.80           H  
ATOM    113  N   VAL A   8       7.686 -10.683  18.339  1.00  6.57           N  
ANISOU  113  N   VAL A   8      969    768    759   -226   -394    116       N  
ATOM    114  CA  VAL A   8       8.630  -9.658  18.782  1.00  7.03           C  
ANISOU  114  CA  VAL A   8     1039    894    739   -384   -419    169       C  
ATOM    115  C   VAL A   8       9.158  -8.960  17.533  1.00  6.54           C  
ANISOU  115  C   VAL A   8      911    805    768   -285   -364     73       C  
ATOM    116  O   VAL A   8       9.486  -9.598  16.525  1.00  7.30           O  
ANISOU  116  O   VAL A   8     1004    752   1020   -281   -322    157       O  
ATOM    117  CB  VAL A   8       9.761 -10.314  19.580  1.00  9.24           C  
ANISOU  117  CB  VAL A   8     1091   1317   1101   -425   -680    453       C  
ATOM    118  CG1 VAL A   8      10.882  -9.356  19.870  1.00 12.23           C  
ANISOU  118  CG1 VAL A   8     1502   1671   1475   -757   -959    548       C  
ATOM    119  CG2 VAL A   8       9.218 -10.883  20.904  1.00 10.72           C  
ANISOU  119  CG2 VAL A   8     1254   1529   1290   -525   -720    573       C  
ATOM    120  H   VAL A   8       7.988 -11.170  17.697  1.00  7.88           H  
ATOM    121  HA  VAL A   8       8.174  -9.002  19.349  1.00  8.44           H  
ATOM    122  HB  VAL A   8      10.127 -11.058  19.059  1.00 11.09           H  
ATOM    123 HG11 VAL A   8      11.562  -9.813  20.370  1.00 14.68           H  
ATOM    124 HG12 VAL A   8      11.244  -9.038  19.040  1.00 14.68           H  
ATOM    125 HG13 VAL A   8      10.539  -8.619  20.382  1.00 14.68           H  
ATOM    126 HG21 VAL A   8       9.940 -11.289  21.389  1.00 12.86           H  
ATOM    127 HG22 VAL A   8       8.838 -10.167  21.419  1.00 12.86           H  
ATOM    128 HG23 VAL A   8       8.545 -11.539  20.709  1.00 12.86           H  
ATOM    129  N   ILE A   9       9.212  -7.649  17.579  1.00  5.99           N  
ANISOU  129  N   ILE A   9      719    873    683   -295   -325    174       N  
ATOM    130  CA  ILE A   9       9.747  -6.879  16.461  1.00  5.56           C  
ANISOU  130  CA  ILE A   9      672    786    656   -241   -295    100       C  
ATOM    131  C   ILE A   9      11.274  -7.051  16.375  1.00  5.67           C  
ANISOU  131  C   ILE A   9      709    786    659   -266   -403     85       C  
ATOM    132  O   ILE A   9      11.981  -7.013  17.386  1.00  6.49           O  
ANISOU  132  O   ILE A   9      683   1003    779   -264   -427     62       O  
ATOM    133  CB  ILE A   9       9.412  -5.392  16.632  1.00  6.00           C  
ANISOU  133  CB  ILE A   9      613    884    784   -192   -279     19       C  
ATOM    134  CG1 ILE A   9       7.901  -5.157  16.690  1.00  6.57           C  
ANISOU  134  CG1 ILE A   9      698    962    838   -136   -229    169       C  
ATOM    135  CG2 ILE A   9      10.050  -4.541  15.557  1.00  6.18           C  
ANISOU  135  CG2 ILE A   9      719    882    747   -120   -241     94       C  
ATOM    136  CD1 ILE A   9       7.130  -5.559  15.414  1.00  7.38           C  
ANISOU  136  CD1 ILE A   9      690   1172    942   -130   -259    134       C  
ATOM    137  H   ILE A   9       8.946  -7.172  18.243  1.00  7.19           H  
ATOM    138  HA  ILE A   9       9.349  -7.195  15.623  1.00  6.68           H  
ATOM    139  HB  ILE A   9       9.782  -5.108  17.483  1.00  7.20           H  
ATOM    140 HG12 ILE A   9       7.537  -5.674  17.427  1.00  7.89           H  
ATOM    141 HG13 ILE A   9       7.741  -4.213  16.844  1.00  7.89           H  
ATOM    142 HG21 ILE A   9       9.814  -3.623  15.705  1.00  7.41           H  
ATOM    143 HG22 ILE A   9      11.004  -4.646  15.602  1.00  7.41           H  
ATOM    144 HG23 ILE A   9       9.729  -4.829  14.700  1.00  7.41           H  
ATOM    145 HD11 ILE A   9       6.196  -5.377  15.543  1.00  8.85           H  
ATOM    146 HD12 ILE A   9       7.464  -5.047  14.673  1.00  8.85           H  
ATOM    147 HD13 ILE A   9       7.262  -6.496  15.251  1.00  8.85           H  
ATOM    148  N   VAL A  10      11.757  -7.222  15.146  1.00  5.30           N  
ANISOU  148  N   VAL A  10      582    778    653   -146   -390     95       N  
ATOM    149  CA  VAL A  10      13.169  -7.149  14.812  1.00  5.67           C  
ANISOU  149  CA  VAL A  10      611    830    712    -57   -372    109       C  
ATOM    150  C   VAL A  10      13.498  -5.777  14.248  1.00  5.50           C  
ANISOU  150  C   VAL A  10      559    875    658   -101   -363     63       C  
ATOM    151  O   VAL A  10      14.391  -5.085  14.759  1.00  6.41           O  
ANISOU  151  O   VAL A  10      652    894    889   -194   -424    154       O  
ATOM    152  CB  VAL A  10      13.556  -8.293  13.847  1.00  6.71           C  
ANISOU  152  CB  VAL A  10      724    919    905      9   -393     54       C  
ATOM    153  CG1 VAL A  10      14.969  -8.090  13.294  1.00  8.10           C  
ANISOU  153  CG1 VAL A  10      786   1077   1215      9   -246    -50       C  
ATOM    154  CG2 VAL A  10      13.391  -9.624  14.521  1.00  8.33           C  
ANISOU  154  CG2 VAL A  10      988   1077   1100    -25   -473     27       C  
ATOM    155  H   VAL A  10      11.261  -7.389  14.464  1.00  6.36           H  
ATOM    156  HA  VAL A  10      13.691  -7.264  15.633  1.00  6.80           H  
ATOM    157  HB  VAL A  10      12.940  -8.274  13.086  1.00  8.05           H  
ATOM    158 HG11 VAL A  10      15.178  -8.815  12.700  1.00  9.72           H  
ATOM    159 HG12 VAL A  10      15.001  -7.257  12.818  1.00  9.72           H  
ATOM    160 HG13 VAL A  10      15.591  -8.075  14.024  1.00  9.72           H  
ATOM    161 HG21 VAL A  10      13.637 -10.318  13.905  1.00  9.99           H  
ATOM    162 HG22 VAL A  10      13.959  -9.655  15.294  1.00  9.99           H  
ATOM    163 HG23 VAL A  10      12.474  -9.729  14.785  1.00  9.99           H  
ATOM    164  N   THR A  11      12.775  -5.359  13.198  1.00  5.23           N  
ANISOU  164  N   THR A  11      543    799    647   -139   -365     87       N  
ATOM    165  CA  THR A  11      12.912  -4.024  12.649  1.00  5.28           C  
ANISOU  165  CA  THR A  11      589    805    610   -113   -293     64       C  
ATOM    166  C   THR A  11      11.522  -3.423  12.485  1.00  5.12           C  
ANISOU  166  C   THR A  11      588    749    610    -56   -351     -3       C  
ATOM    167  O   THR A  11      10.648  -4.073  11.910  1.00  5.65           O  
ANISOU  167  O   THR A  11      567    816    762   -146   -433     -4       O  
ATOM    168  CB  THR A  11      13.658  -4.008  11.298  1.00  6.23           C  
ANISOU  168  CB  THR A  11      679    954    736      1   -279     97       C  
ATOM    169  OG1 THR A  11      14.932  -4.634  11.448  1.00  7.97           O  
ANISOU  169  OG1 THR A  11      752   1047   1228    166   -108    263       O  
ATOM    170  CG2 THR A  11      13.807  -2.599  10.803  1.00  8.16           C  
ANISOU  170  CG2 THR A  11      926   1099   1075    -70     42    180       C  
ATOM    171  H   THR A  11      12.194  -5.844  12.789  1.00  6.28           H  
ATOM    172  HA  THR A  11      13.414  -3.467  13.280  1.00  6.33           H  
ATOM    173  HB  THR A  11      13.139  -4.502  10.644  1.00  7.48           H  
ATOM    174  HG1 THR A  11      15.334  -4.629  10.733  1.00  9.56           H  
ATOM    175 HG21 THR A  11      14.271  -2.593   9.963  1.00  9.79           H  
ATOM    176 HG22 THR A  11      12.942  -2.200  10.684  1.00  9.79           H  
ATOM    177 HG23 THR A  11      14.305  -2.079  11.438  1.00  9.79           H  
ATOM    178  N   GLY A  12      11.329  -2.240  13.025  1.00  5.30           N  
ANISOU  178  N   GLY A  12      515    740    758    -75   -305    108       N  
ATOM    179  CA  GLY A  12      10.076  -1.535  12.978  1.00  5.87           C  
ANISOU  179  CA  GLY A  12      701    768    764    -95   -195    176       C  
ATOM    180  C   GLY A  12      10.005  -0.503  11.876  1.00  5.44           C  
ANISOU  180  C   GLY A  12      613    690    765   -159   -298     39       C  
ATOM    181  O   GLY A  12      10.955  -0.246  11.148  1.00  6.16           O  
ANISOU  181  O   GLY A  12      631    815    895   -146   -179    192       O  
ATOM    182  H   GLY A  12      11.942  -1.806  13.445  1.00  6.36           H  
ATOM    183  HA2 GLY A  12       9.356  -2.172  12.844  1.00  7.05           H  
ATOM    184  HA3 GLY A  12       9.930  -1.085  13.825  1.00  7.05           H  
ATOM    185  N   LEU A  13       8.845   0.111  11.793  1.00  5.75           N  
ANISOU  185  N   LEU A  13      612    756    816   -113   -235    140       N  
ATOM    186  CA  LEU A  13       8.571   1.202  10.856  1.00  5.75           C  
ANISOU  186  CA  LEU A  13      653    777    755    -68   -223    123       C  
ATOM    187  C   LEU A  13       9.085   2.538  11.380  1.00  5.89           C  
ANISOU  187  C   LEU A  13      536    763    938   -172   -285    102       C  
ATOM    188  O   LEU A  13       9.208   2.750  12.587  1.00  6.56           O  
ANISOU  188  O   LEU A  13      823    881    789   -228   -355     74       O  
ATOM    189  CB  LEU A  13       7.059   1.298  10.616  1.00  6.13           C  
ANISOU  189  CB  LEU A  13      673    840    816    -86   -285     53       C  
ATOM    190  CG  LEU A  13       6.403   0.049  10.060  1.00  6.53           C  
ANISOU  190  CG  LEU A  13      862    937    680   -185   -357     47       C  
ATOM    191  CD1 LEU A  13       4.925   0.287   9.889  1.00  8.35           C  
ANISOU  191  CD1 LEU A  13      902   1135   1134   -190   -424     -9       C  
ATOM    192  CD2 LEU A  13       7.057  -0.356   8.714  1.00  8.00           C  
ANISOU  192  CD2 LEU A  13     1031   1121    889   -135   -201    -45       C  
ATOM    193  H   LEU A  13       8.168  -0.089  12.285  1.00  6.90           H  
ATOM    194  HA  LEU A  13       9.010   1.015  10.000  1.00  6.90           H  
ATOM    195  HB2 LEU A  13       6.628   1.502  11.460  1.00  7.36           H  
ATOM    196  HB3 LEU A  13       6.894   2.017   9.987  1.00  7.36           H  
ATOM    197  HG  LEU A  13       6.522  -0.681  10.688  1.00  7.83           H  
ATOM    198 HD11 LEU A  13       4.519  -0.508   9.537  1.00 10.02           H  
ATOM    199 HD12 LEU A  13       4.542   0.500  10.744  1.00 10.02           H  
ATOM    200 HD13 LEU A  13       4.795   1.018   9.280  1.00 10.02           H  
ATOM    201 HD21 LEU A  13       6.626  -1.147   8.383  1.00  9.60           H  
ATOM    202 HD22 LEU A  13       6.951   0.363   8.087  1.00  9.60           H  
ATOM    203 HD23 LEU A  13       7.991  -0.528   8.861  1.00  9.60           H  
ATOM    204  N   GLN A  14       9.341   3.460  10.471  1.00  6.06           N  
ANISOU  204  N   GLN A  14      635    755    912   -101   -177    233       N  
ATOM    205  CA  GLN A  14       9.703   4.819  10.845  1.00  6.36           C  
ANISOU  205  CA  GLN A  14      566    791   1059   -189   -282    189       C  
ATOM    206  C   GLN A  14       9.044   5.823   9.909  1.00  6.56           C  
ANISOU  206  C   GLN A  14      587    703   1201   -175   -440    220       C  
ATOM    207  O   GLN A  14       8.706   5.509   8.767  1.00  7.08           O  
ANISOU  207  O   GLN A  14      763    765   1160   -199   -265    242       O  
ATOM    208  CB  GLN A  14      11.221   5.064  10.815  1.00  8.57           C  
ANISOU  208  CB  GLN A  14      604   1127   1527   -136   -299    316       C  
ATOM    209  CG  GLN A  14      12.013   4.030  11.586  1.00  8.77           C  
ANISOU  209  CG  GLN A  14      555   1266   1511     29   -319    244       C  
ATOM    210  CD  GLN A  14      11.923   4.166  13.074  1.00  9.04           C  
ANISOU  210  CD  GLN A  14      607   1453   1377    -22   -340    248       C  
ATOM    211  OE1 GLN A  14      11.452   5.155  13.618  1.00 11.17           O  
ANISOU  211  OE1 GLN A  14     1031   1591   1621     71   -691     13       O  
ATOM    212  NE2 GLN A  14      12.404   3.145  13.757  1.00 10.26           N  
ANISOU  212  NE2 GLN A  14      826   1548   1526    144   -307    390       N  
ATOM    213  H   GLN A  14       9.312   3.326   9.622  1.00  7.27           H  
ATOM    214  HA  GLN A  14       9.384   4.996  11.754  1.00  7.63           H  
ATOM    215  HB2 GLN A  14      11.524   5.045   9.894  1.00 10.29           H  
ATOM    216  HB3 GLN A  14      11.406   5.933  11.205  1.00 10.29           H  
ATOM    217  HG2 GLN A  14      11.685   3.148  11.351  1.00 10.53           H  
ATOM    218  HG3 GLN A  14      12.948   4.108  11.339  1.00 10.53           H  
ATOM    219 HE21 GLN A  14      12.385   3.156  14.617  1.00 12.31           H  
ATOM    220 HE22 GLN A  14      12.737   2.469  13.343  1.00 12.31           H  
ATOM    221  N   ASP A  15       8.860   7.031  10.399  1.00  7.21           N  
ANISOU  221  N   ASP A  15      806    690   1243   -195   -421    214       N  
ATOM    222  CA  ASP A  15       8.212   8.056   9.608  1.00  7.96           C  
ANISOU  222  CA  ASP A  15      848    872   1305   -291   -438    211       C  
ATOM    223  C   ASP A  15       8.938   8.257   8.290  1.00  7.76           C  
ANISOU  223  C   ASP A  15      656    888   1405   -205   -289    328       C  
ATOM    224  O   ASP A  15      10.178   8.259   8.238  1.00  9.05           O  
ANISOU  224  O   ASP A  15      728   1014   1698   -208   -310    457       O  
ATOM    225  CB  ASP A  15       8.173   9.362  10.377  1.00  9.93           C  
ANISOU  225  CB  ASP A  15     1113   1100   1560   -468   -478      3       C  
ATOM    226  CG  ASP A  15       7.334   9.285  11.648  1.00 10.79           C  
ANISOU  226  CG  ASP A  15     1256   1192   1650   -246   -529   -390       C  
ATOM    227  OD1 ASP A  15       6.606   8.295  11.875  1.00  9.23           O  
ANISOU  227  OD1 ASP A  15     1038   1175   1295   -252   -386   -253       O  
ATOM    228  OD2 ASP A  15       7.422  10.252  12.436  1.00 16.18           O  
ANISOU  228  OD2 ASP A  15     2408   1414   2326   -585   -131   -910       O  
ATOM    229  H   ASP A  15       9.099   7.284  11.185  1.00  8.65           H  
ATOM    230  HA  ASP A  15       7.291   7.784   9.415  1.00  9.56           H  
ATOM    231  HB2 ASP A  15       9.077   9.605  10.630  1.00 11.91           H  
ATOM    232  HB3 ASP A  15       7.792  10.050   9.809  1.00 11.91           H  
ATOM    233  N   THR A  16       8.165   8.440   7.222  1.00  7.95           N  
ANISOU  233  N   THR A  16      698   1052   1270    -31   -248    433       N  
ATOM    234  CA  THR A  16       8.678   8.419   5.856  1.00  9.66           C  
ANISOU  234  CA  THR A  16     1167   1223   1280    476    153    520       C  
ATOM    235  C   THR A  16       7.915   9.428   5.024  1.00  7.36           C  
ANISOU  235  C   THR A  16      719    878   1202    -49   -155    289       C  
ATOM    236  O   THR A  16       6.717   9.592   5.210  1.00  7.07           O  
ANISOU  236  O   THR A  16      713    850   1125    -24    -81    208       O  
ATOM    237  CB  THR A  16       8.432   6.986   5.246  1.00 15.43           C  
ANISOU  237  CB  THR A  16     2652   1830   1382   1244    315    682       C  
ATOM    238  OG1 THR A  16       9.090   5.977   5.994  1.00 14.03           O  
ANISOU  238  OG1 THR A  16     1658   1719   1954    539    157    419       O  
ATOM    239  CG2 THR A  16       8.954   6.921   3.820  1.00 24.59           C  
ANISOU  239  CG2 THR A  16     4153   2910   2281   1722   1606    860       C  
ATOM    240  H   THR A  16       7.318   8.581   7.266  1.00  9.54           H  
ATOM    241  HA  THR A  16       9.635   8.629   5.839  1.00 11.59           H  
ATOM    242  HB  THR A  16       7.480   6.804   5.230  1.00 18.52           H  
ATOM    243  HG1 THR A  16       8.814   5.975   6.766  1.00 16.84           H  
ATOM    244 HG21 THR A  16       8.801   6.047   3.455  1.00 29.51           H  
ATOM    245 HG22 THR A  16       8.502   7.570   3.276  1.00 29.51           H  
ATOM    246 HG23 THR A  16       9.896   7.105   3.807  1.00 29.51           H  
ATOM    247  N   THR A  17       8.624  10.040   4.067  1.00  7.31           N  
ANISOU  247  N   THR A  17      722    795   1262    -72   -131    302       N  
ATOM    248  CA  THR A  17       8.010  10.830   3.004  1.00  6.22           C  
ANISOU  248  CA  THR A  17      633    747    985     -5   -228    201       C  
ATOM    249  C   THR A  17       8.210  10.111   1.676  1.00  6.70           C  
ANISOU  249  C   THR A  17      795    621   1130      0      5     62       C  
ATOM    250  O   THR A  17       9.315   9.602   1.417  1.00  6.97           O  
ANISOU  250  O   THR A  17      757    664   1225     42    -92     46       O  
ATOM    251  CB  THR A  17       8.624  12.218   2.948  1.00  7.02           C  
ANISOU  251  CB  THR A  17      903    787    977    -94   -148     59       C  
ATOM    252  OG1 THR A  17       8.325  12.885   4.180  1.00  7.73           O  
ANISOU  252  OG1 THR A  17      915    791   1231   -222   -208    -14       O  
ATOM    253  CG2 THR A  17       8.078  13.057   1.807  1.00  8.31           C  
ANISOU  253  CG2 THR A  17     1164    983   1012   -178   -129    172       C  
ATOM    254  H   THR A  17       9.482  10.008   4.015  1.00  8.78           H  
ATOM    255  HA  THR A  17       7.048  10.919   3.171  1.00  7.47           H  
ATOM    256  HB  THR A  17       9.585  12.143   2.844  1.00  8.42           H  
ATOM    257  HG1 THR A  17       8.646  13.639   4.176  1.00  9.27           H  
ATOM    258 HG21 THR A  17       8.492  13.923   1.810  1.00  9.98           H  
ATOM    259 HG22 THR A  17       8.258  12.628   0.968  1.00  9.98           H  
ATOM    260 HG23 THR A  17       7.129  13.166   1.905  1.00  9.98           H  
ATOM    261  N  AVAL A  18       7.163  10.107   0.852  0.61  5.69           N  
ANISOU  261  N  AVAL A  18      470    514   1176     75   -211    -56       N  
ATOM    262  N  BVAL A  18       7.180  10.082   0.838  0.39  8.35           N  
ANISOU  262  N  BVAL A  18     1201   1039    934   -341   -152    155       N  
ATOM    263  CA AVAL A  18       7.195   9.567  -0.489  0.61  5.91           C  
ANISOU  263  CA AVAL A  18      600    492   1155     53    -44   -136       C  
ATOM    264  CA BVAL A  18       7.326   9.644  -0.540  0.39 10.49           C  
ANISOU  264  CA BVAL A  18     1491   1412   1084   -354   -410    108       C  
ATOM    265  C  AVAL A  18       6.511  10.586  -1.380  0.61  6.23           C  
ANISOU  265  C  AVAL A  18      979    452    937     -8    -64   -117       C  
ATOM    266  C  BVAL A  18       6.661  10.684  -1.414  0.39  8.45           C  
ANISOU  266  C  BVAL A  18      966   1072   1171   -310   -344     58       C  
ATOM    267  O  AVAL A  18       5.569  11.269  -0.967  0.61  6.38           O  
ANISOU  267  O  AVAL A  18      862    514   1050      3   -187    -80       O  
ATOM    268  O  BVAL A  18       5.874  11.497  -0.937  0.39  8.54           O  
ANISOU  268  O  BVAL A  18     1264    862   1118   -146    -49     40       O  
ATOM    269  CB AVAL A  18       6.484   8.206  -0.515  0.61  6.82           C  
ANISOU  269  CB AVAL A  18      855    679   1060      4   -271   -126       C  
ATOM    270  CB BVAL A  18       6.662   8.283  -0.794  0.39 16.29           C  
ANISOU  270  CB BVAL A  18     1893   2181   2114   -547   -936    179       C  
ATOM    271  CG1AVAL A  18       6.357   7.638  -1.918  0.61  9.05           C  
ANISOU  271  CG1AVAL A  18     1304   1058   1076     21   -249   -186       C  
ATOM    272  CG1BVAL A  18       7.396   7.178  -0.054  0.39 20.22           C  
ANISOU  272  CG1BVAL A  18     2353   2737   2591   -517  -1095    156       C  
ATOM    273  CG2AVAL A  18       7.241   7.225   0.344  0.61  7.34           C  
ANISOU  273  CG2AVAL A  18      750    831   1209    -66   -258    -49       C  
ATOM    274  CG2BVAL A  18       5.198   8.329  -0.398  0.39 18.19           C  
ANISOU  274  CG2BVAL A  18     2153   2489   2268   -982   -773     17       C  
ATOM    275  H  AVAL A  18       6.394  10.427   1.066  0.61  6.82           H  
ATOM    276  H  BVAL A  18       6.378  10.314   1.047  0.39 10.02           H  
ATOM    277  HA AVAL A  18       8.122   9.451  -0.785  0.61  7.09           H  
ATOM    278  HA BVAL A  18       8.275   9.586  -0.776  0.39 12.59           H  
ATOM    279  HB AVAL A  18       5.583   8.306  -0.143  0.61  8.19           H  
ATOM    280  HB BVAL A  18       6.707   8.083  -1.752  0.39 19.54           H  
ATOM    281 HG11AVAL A  18       5.907   6.791  -1.873  0.61 10.86           H  
ATOM    282 HG11BVAL A  18       6.960   6.341  -0.231  0.39 24.26           H  
ATOM    283 HG12AVAL A  18       5.851   8.249  -2.458  0.61 10.86           H  
ATOM    284 HG12BVAL A  18       8.304   7.146  -0.362  0.39 24.26           H  
ATOM    285 HG13AVAL A  18       7.235   7.523  -2.289  0.61 10.86           H  
ATOM    286 HG13BVAL A  18       7.375   7.366   0.887  0.39 24.26           H  
ATOM    287 HG21AVAL A  18       6.789   6.378   0.322  0.61  8.81           H  
ATOM    288 HG21BVAL A  18       4.802   7.471  -0.565  0.39 21.82           H  
ATOM    289 HG22AVAL A  18       8.132   7.131  -0.001  0.61  8.81           H  
ATOM    290 HG22BVAL A  18       5.133   8.545   0.535  0.39 21.82           H  
ATOM    291 HG23AVAL A  18       7.271   7.556   1.244  0.61  8.81           H  
ATOM    292 HG23BVAL A  18       4.754   9.001  -0.921  0.39 21.82           H  
ATOM    293  N  ASER A  19       6.983  10.725  -2.612  0.61  8.61           N  
ANISOU  293  N  ASER A  19     1507    673   1093     29   -119    -58       N  
ATOM    294  N  BSER A  19       6.976  10.663  -2.703  0.39  7.05           N  
ANISOU  294  N  BSER A  19      696   1059    924   -234   -367    117       N  
ATOM    295  CA ASER A  19       6.299  11.594  -3.564  0.61  9.06           C  
ANISOU  295  CA ASER A  19     1351    983   1110   -247   -215     84       C  
ATOM    296  CA BSER A  19       6.340  11.561  -3.650  0.39  8.60           C  
ANISOU  296  CA BSER A  19     1087   1078   1104   -230    -54    102       C  
ATOM    297  C  ASER A  19       4.893  11.081  -3.851  0.61  7.31           C  
ANISOU  297  C  ASER A  19     1362    853    564   -189    -91    154       C  
ATOM    298  C  BSER A  19       4.946  11.067  -4.020  0.39  8.36           C  
ANISOU  298  C  BSER A  19     1151    714   1311   -122   -274   -111       C  
ATOM    299  O  ASER A  19       4.598   9.899  -3.702  0.61  8.14           O  
ANISOU  299  O  ASER A  19     1523    935    635   -154   -133     80       O  
ATOM    300  O  BSER A  19       4.688   9.868  -4.065  0.39  5.24           O  
ANISOU  300  O  BSER A  19      964    321    706   -176   -172   -113       O  
ATOM    301  CB ASER A  19       7.085  11.667  -4.872  0.61 12.12           C  
ANISOU  301  CB ASER A  19     1616   1551   1439   -544   -123    202       C  
ATOM    302  CB BSER A  19       7.187  11.646  -4.914  0.39 11.19           C  
ANISOU  302  CB BSER A  19     1703   1401   1149   -181      6     94       C  
ATOM    303  OG ASER A  19       8.342  12.267  -4.642  0.61 15.37           O  
ANISOU  303  OG ASER A  19     1695   1890   2255   -713   -197    292       O  
ATOM    304  OG BSER A  19       6.587  12.519  -5.838  0.39  9.86           O  
ANISOU  304  OG BSER A  19     1348   1336   1064   -160   -263    538       O  
ATOM    305  H  ASER A  19       7.686  10.336  -2.918  0.61 10.34           H  
ATOM    306  H  BSER A  19       7.557  10.135  -3.054  0.39  8.46           H  
ATOM    307  HA ASER A  19       6.231  12.498  -3.192  0.61 10.88           H  
ATOM    308  HA BSER A  19       6.265  12.456  -3.260  0.39 10.32           H  
ATOM    309  HB2ASER A  19       7.218  10.769  -5.215  0.61 14.55           H  
ATOM    310  HB2BSER A  19       8.068  11.981  -4.686  0.39 13.43           H  
ATOM    311  HB3ASER A  19       6.590  12.200  -5.513  0.61 14.55           H  
ATOM    312  HB3BSER A  19       7.257  10.763  -5.310  0.39 13.43           H  
ATOM    313  HG ASER A  19       8.766  12.307  -5.343  0.61 18.45           H  
ATOM    314  HG BSER A  19       5.892  12.822  -5.527  0.39 11.84           H  
ATOM    315  N   SER A  20       4.049  11.996  -4.315  1.00  8.44           N  
ANISOU  315  N   SER A  20     1311    917    978      2   -249     59       N  
ATOM    316  CA  SER A  20       2.829  11.605  -4.985  1.00  9.07           C  
ANISOU  316  CA  SER A  20     1272   1059   1114     70   -442     25       C  
ATOM    317  C   SER A  20       3.195  10.928  -6.304  1.00  8.63           C  
ANISOU  317  C   SER A  20     1404    938    935     11   -297     28       C  
ATOM    318  O   SER A  20       4.329  11.062  -6.833  1.00  9.50           O  
ANISOU  318  O   SER A  20     1679    929    999    -51   -192     64       O  
ATOM    319  CB  SER A  20       1.960  12.821  -5.255  1.00 12.09           C  
ANISOU  319  CB  SER A  20     1601   1530   1462    161   -415    -17       C  
ATOM    320  OG  SER A  20       2.642  13.752  -6.045  1.00 16.74           O  
ANISOU  320  OG  SER A  20     2353   1780   2228    347   -728    192       O  
ATOM    321  H  ASER A  20       4.164  12.846  -4.252  0.57 10.13           H  
ATOM    322  H  BSER A  20       4.121  12.835  -4.143  0.43 10.13           H  
ATOM    323  HA  SER A  20       2.328  10.972  -4.430  1.00 10.88           H  
ATOM    324  HB2 SER A  20       1.157  12.539  -5.720  1.00 14.51           H  
ATOM    325  HB3 SER A  20       1.726  13.235  -4.409  1.00 14.51           H  
ATOM    326  HG  SER A  20       3.393  13.473  -6.223  1.00 20.09           H  
ATOM    327  N   ASP A  21       2.240  10.202  -6.867  1.00  9.27           N  
ANISOU  327  N   ASP A  21     1495   1022   1006     65   -422    -42       N  
ATOM    328  CA  ASP A  21       2.421   9.530  -8.159  1.00 10.32           C  
ANISOU  328  CA  ASP A  21     1730   1226    966    127   -277      6       C  
ATOM    329  C   ASP A  21       3.615   8.602  -8.085  1.00 10.21           C  
ANISOU  329  C   ASP A  21     1972    999    907    -80     23     17       C  
ATOM    330  O   ASP A  21       4.458   8.546  -8.987  1.00 12.66           O  
ANISOU  330  O   ASP A  21     2536   1065   1209    159    414    189       O  
ATOM    331  CB  ASP A  21       2.619  10.520  -9.299  1.00 13.48           C  
ANISOU  331  CB  ASP A  21     2270   1660   1189     85   -190    191       C  
ATOM    332  CG  ASP A  21       1.410  11.376  -9.557  1.00 15.70           C  
ANISOU  332  CG  ASP A  21     2148   1946   1870   -138   -768    349       C  
ATOM    333  OD1 ASP A  21       1.600  12.565  -9.904  1.00 19.44           O  
ANISOU  333  OD1 ASP A  21     3181   1788   2419    127   -677    -62       O  
ATOM    334  OD2 ASP A  21       0.285  10.838  -9.494  1.00 18.54           O  
ANISOU  334  OD2 ASP A  21     2736   2474   1834   -258   -677    380       O  
ATOM    335  H   ASP A  21       1.463  10.078  -6.519  1.00 11.12           H  
ATOM    336  HA  ASP A  21       1.626   8.992  -8.356  1.00 12.39           H  
ATOM    337  HB2 ASP A  21       3.360  11.108  -9.081  1.00 16.17           H  
ATOM    338  HB3 ASP A  21       2.816  10.029 -10.112  1.00 16.17           H  
ATOM    339  N  ASER A  22       3.696   7.853  -6.988  0.54  8.02           N  
ANISOU  339  N  ASER A  22      992    995   1061    203   -238    178       N  
ATOM    340  N  BSER A  22       3.678   7.836  -7.000  0.46 10.38           N  
ANISOU  340  N  BSER A  22     1866   1037   1039   -388    432     58       N  
ATOM    341  CA ASER A  22       4.763   6.880  -6.772  0.54  9.62           C  
ANISOU  341  CA ASER A  22     1430   1283    943    -49    -19   -140       C  
ATOM    342  CA BSER A  22       4.776   6.924  -6.756  0.46  8.90           C  
ANISOU  342  CA BSER A  22     1247   1083   1051   -420     65    221       C  
ATOM    343  C  ASER A  22       4.229   5.663  -6.017  0.54  7.78           C  
ANISOU  343  C  ASER A  22     1236    972    746    272   -586   -163       C  
ATOM    344  C  BSER A  22       4.250   5.684  -6.014  0.46  8.32           C  
ANISOU  344  C  BSER A  22      969   1026   1165   -475    331    110       C  
ATOM    345  O  ASER A  22       3.037   5.415  -5.997  0.54  7.15           O  
ANISOU  345  O  ASER A  22     1206    714    798    188   -561     -1       O  
ATOM    346  O  BSER A  22       3.065   5.449  -5.971  0.46  8.86           O  
ANISOU  346  O  BSER A  22      976    932   1458   -260    391    -76       O  
ATOM    347  CB ASER A  22       5.992   7.495  -6.058  0.54 15.25           C  
ANISOU  347  CB ASER A  22     1723   1943   2131   -414    618   -690       C  
ATOM    348  CB BSER A  22       5.880   7.648  -5.977  0.46  9.42           C  
ANISOU  348  CB BSER A  22      949   1164   1466    -67    -41    565       C  
ATOM    349  OG ASER A  22       5.886   7.491  -4.634  0.54 18.90           O  
ANISOU  349  OG ASER A  22     2575   2266   2341   -503    298   -495       O  
ATOM    350  OG BSER A  22       7.053   6.868  -5.855  0.46 11.19           O  
ANISOU  350  OG BSER A  22      873   1190   2188   -172   -118    578       O  
ATOM    351  H  ASER A  22       3.132   7.892  -6.340  0.54  9.62           H  
ATOM    352  H  BSER A  22       3.081   7.831  -6.381  0.46 12.45           H  
ATOM    353  HA ASER A  22       5.068   6.565  -7.649  0.54 11.55           H  
ATOM    354  HA BSER A  22       5.149   6.631  -7.614  0.46 10.68           H  
ATOM    355  HB2ASER A  22       6.778   6.985  -6.308  0.54 18.31           H  
ATOM    356  HB2BSER A  22       6.101   8.470  -6.443  0.46 11.30           H  
ATOM    357  HB3ASER A  22       6.092   8.412  -6.355  0.54 18.31           H  
ATOM    358  HB3BSER A  22       5.550   7.853  -5.089  0.46 11.30           H  
ATOM    359  HG ASER A  22       5.173   7.155  -4.407  0.54 22.69           H  
ATOM    360  HG BSER A  22       7.622   7.282  -5.435  0.46 13.43           H  
ATOM    361  N   VAL A  23       5.141   4.862  -5.489  1.00  7.63           N  
ANISOU  361  N   VAL A  23      838   1096    965   -197    -80    130       N  
ATOM    362  CA  VAL A  23       4.814   3.690  -4.670  1.00  7.12           C  
ANISOU  362  CA  VAL A  23      815   1166    724   -104   -168    144       C  
ATOM    363  C   VAL A  23       5.547   3.841  -3.335  1.00  7.42           C  
ANISOU  363  C   VAL A  23      640   1292    886   -175   -252     68       C  
ATOM    364  O   VAL A  23       6.725   4.143  -3.313  1.00  9.47           O  
ANISOU  364  O   VAL A  23      789   1760   1051   -300   -201    118       O  
ATOM    365  CB  VAL A  23       5.222   2.407  -5.350  1.00  7.81           C  
ANISOU  365  CB  VAL A  23      738   1217   1013    -35    -52     31       C  
ATOM    366  CG1 VAL A  23       5.026   1.208  -4.445  1.00  8.73           C  
ANISOU  366  CG1 VAL A  23     1031   1249   1036    152    -74     -4       C  
ATOM    367  CG2 VAL A  23       4.430   2.212  -6.627  1.00  8.79           C  
ANISOU  367  CG2 VAL A  23     1033   1290   1016     84   -155   -190       C  
ATOM    368  H  AVAL A  23       5.987   4.976  -5.592  0.53  9.16           H  
ATOM    369  H  BVAL A  23       5.988   4.963  -5.597  0.47  9.16           H  
ATOM    370  HA  VAL A  23       3.850   3.663  -4.499  1.00  8.54           H  
ATOM    371  HB  VAL A  23       6.172   2.458  -5.587  1.00  9.37           H  
ATOM    372 HG11 VAL A  23       5.297   0.416  -4.914  1.00 10.47           H  
ATOM    373 HG12 VAL A  23       5.562   1.322  -3.657  1.00 10.47           H  
ATOM    374 HG13 VAL A  23       4.099   1.147  -4.205  1.00 10.47           H  
ATOM    375 HG21 VAL A  23       4.705   1.391  -7.043  1.00 10.54           H  
ATOM    376 HG22 VAL A  23       3.495   2.172  -6.411  1.00 10.54           H  
ATOM    377 HG23 VAL A  23       4.599   2.951  -7.216  1.00 10.54           H  
ATOM    378  N   ALA A  24       4.820   3.682  -2.239  1.00  6.20           N  
ANISOU  378  N   ALA A  24      642    907    806   -156   -252     92       N  
ATOM    379  CA  ALA A  24       5.404   3.686  -0.907  1.00  6.37           C  
ANISOU  379  CA  ALA A  24      784    827    811   -246   -246    -20       C  
ATOM    380  C   ALA A  24       5.604   2.263  -0.424  1.00  6.14           C  
ANISOU  380  C   ALA A  24      799    721    813   -311   -320    134       C  
ATOM    381  O   ALA A  24       4.706   1.430  -0.567  1.00  7.70           O  
ANISOU  381  O   ALA A  24      797    749   1381   -344   -525    212       O  
ATOM    382  CB  ALA A  24       4.532   4.446   0.064  1.00  7.55           C  
ANISOU  382  CB  ALA A  24     1002    997    868   -286   -217    -22       C  
ATOM    383  H   ALA A  24       3.967   3.568  -2.240  1.00  7.44           H  
ATOM    384  HA  ALA A  24       6.280   4.124  -0.940  1.00  7.65           H  
ATOM    385  HB1 ALA A  24       4.943   4.430   0.932  1.00  9.05           H  
ATOM    386  HB2 ALA A  24       4.442   5.352  -0.240  1.00  9.05           H  
ATOM    387  HB3 ALA A  24       3.669   4.027   0.103  1.00  9.05           H  
ATOM    388  N   LYS A  25       6.777   1.972   0.130  1.00  6.88           N  
ANISOU  388  N   LYS A  25      890    833    890   -316   -461    158       N  
ATOM    389  CA  LYS A  25       7.124   0.656   0.614  1.00  7.16           C  
ANISOU  389  CA  LYS A  25      909    931    881   -419   -520    180       C  
ATOM    390  C   LYS A  25       7.373   0.687   2.116  1.00  6.95           C  
ANISOU  390  C   LYS A  25      839    886    914   -400   -467     89       C  
ATOM    391  O   LYS A  25       8.099   1.542   2.625  1.00 10.85           O  
ANISOU  391  O   LYS A  25     1784   1252   1088  -1033   -807    331       O  
ATOM    392  CB  LYS A  25       8.361   0.127  -0.101  1.00  8.23           C  
ANISOU  392  CB  LYS A  25     1101   1131    893   -270   -506    111       C  
ATOM    393  CG  LYS A  25       8.141  -0.171  -1.578  1.00  8.70           C  
ANISOU  393  CG  LYS A  25     1061   1249    995   -446   -398    107       C  
ATOM    394  CD  LYS A  25       9.416  -0.673  -2.254  1.00  9.53           C  
ANISOU  394  CD  LYS A  25     1292   1311   1019   -246   -399     14       C  
ATOM    395  CE  LYS A  25       9.142  -1.044  -3.705  1.00  9.30           C  
ANISOU  395  CE  LYS A  25     1171   1359   1005   -406   -360     -1       C  
ATOM    396  NZ  LYS A  25      10.397  -1.368  -4.438  1.00  9.57           N  
ANISOU  396  NZ  LYS A  25     1226   1415    994   -328   -354    -92       N  
ATOM    397  H   LYS A  25       7.406   2.549   0.237  1.00  8.25           H  
ATOM    398  HA  LYS A  25       6.381   0.041   0.439  1.00  8.59           H  
ATOM    399  HB2 LYS A  25       9.067   0.790  -0.035  1.00  9.87           H  
ATOM    400  HB3 LYS A  25       8.642  -0.696   0.328  1.00  9.87           H  
ATOM    401  HG2 LYS A  25       7.461  -0.857  -1.666  1.00 10.44           H  
ATOM    402  HG3 LYS A  25       7.858   0.640  -2.028  1.00 10.44           H  
ATOM    403  HD2 LYS A  25      10.087   0.028  -2.238  1.00 11.44           H  
ATOM    404  HD3 LYS A  25       9.739  -1.461  -1.791  1.00 11.44           H  
ATOM    405  HE2 LYS A  25       8.566  -1.824  -3.731  1.00 11.16           H  
ATOM    406  HE3 LYS A  25       8.715  -0.296  -4.151  1.00 11.16           H  
ATOM    407  HZ1 LYS A  25      10.210  -1.582  -5.282  1.00 11.48           H  
ATOM    408  HZ2 LYS A  25      10.943  -0.665  -4.432  1.00 11.48           H  
ATOM    409  HZ3 LYS A  25      10.807  -2.056  -4.050  1.00 11.48           H  
ATOM    410  N  APHE A  26       6.801  -0.269   2.817  0.60  5.18           N  
ANISOU  410  N  APHE A  26      719    611    637   -330   -526    185       N  
ATOM    411  N  BPHE A  26       6.751  -0.263   2.804  0.40  6.67           N  
ANISOU  411  N  BPHE A  26      517    869   1148     48   -145   -169       N  
ATOM    412  CA APHE A  26       7.032  -0.483   4.233  0.60  5.52           C  
ANISOU  412  CA APHE A  26      659    751    689   -244   -597    262       C  
ATOM    413  CA BPHE A  26       6.972  -0.508   4.223  0.40  5.88           C  
ANISOU  413  CA BPHE A  26      702    796    734     18    -78   -299       C  
ATOM    414  C  APHE A  26       7.328  -1.941   4.483  0.60  5.06           C  
ANISOU  414  C  APHE A  26      611    726    583   -131   -435    -54       C  
ATOM    415  C  BPHE A  26       7.397  -1.950   4.423  0.40  5.49           C  
ANISOU  415  C  BPHE A  26      673    738    674   -156   -199    -35       C  
ATOM    416  O  APHE A  26       6.700  -2.834   3.892  0.60  4.64           O  
ANISOU  416  O  APHE A  26      485    629    650   -227   -494    -45       O  
ATOM    417  O  BPHE A  26       6.941  -2.842   3.707  0.40  6.03           O  
ANISOU  417  O  BPHE A  26      707    741    841     48   -101    127       O  
ATOM    418  CB APHE A  26       5.792  -0.094   5.061  0.60  6.36           C  
ANISOU  418  CB APHE A  26      715    948    753   -344   -456    169       C  
ATOM    419  CB BPHE A  26       5.683  -0.246   5.033  0.40  6.75           C  
ANISOU  419  CB BPHE A  26      938    834    791    280     38    -15       C  
ATOM    420  CG APHE A  26       5.541   1.395   5.132  0.60  7.54           C  
ANISOU  420  CG APHE A  26     1013   1154    699    -40   -340     25       C  
ATOM    421  CG BPHE A  26       5.082   1.109   4.789  0.40  6.62           C  
ANISOU  421  CG BPHE A  26     1024    866    625    234   -433    -83       C  
ATOM    422  CD1APHE A  26       4.241   1.890   5.051  0.60  9.55           C  
ANISOU  422  CD1APHE A  26      808   1315   1505     -4    -92    150       C  
ATOM    423  CD1BPHE A  26       5.292   2.152   5.674  0.40  9.25           C  
ANISOU  423  CD1BPHE A  26     1744   1037    734    348   -567    -42       C  
ATOM    424  CD2APHE A  26       6.583   2.302   5.335  0.60 10.85           C  
ANISOU  424  CD2APHE A  26      982   1205   1936    -80   -527   -138       C  
ATOM    425  CD2BPHE A  26       4.293   1.337   3.665  0.40  7.04           C  
ANISOU  425  CD2BPHE A  26      840   1045    791    116   -612     -2       C  
ATOM    426  CE1APHE A  26       3.980   3.248   5.143  0.60 12.07           C  
ANISOU  426  CE1APHE A  26     1033   1479   2074    399    363    103       C  
ATOM    427  CE1BPHE A  26       4.745   3.402   5.436  0.40 12.70           C  
ANISOU  427  CE1BPHE A  26     2550   1371    904    664   -387    -59       C  
ATOM    428  CE2APHE A  26       6.331   3.667   5.424  0.60 11.31           C  
ANISOU  428  CE2APHE A  26     1177   1282   1837     83   -434    -81       C  
ATOM    429  CE2BPHE A  26       3.769   2.586   3.429  0.40  8.46           C  
ANISOU  429  CE2BPHE A  26     1230   1242    744    438   -495    -47       C  
ATOM    430  CZ APHE A  26       5.040   4.137   5.339  0.60 10.89           C  
ANISOU  430  CZ APHE A  26     1458   1403   1276    375     71    213       C  
ATOM    431  CZ BPHE A  26       3.975   3.607   4.312  0.40 13.91           C  
ANISOU  431  CZ BPHE A  26     2264   1487   1535    656   -852   -270       C  
ATOM    432  H  APHE A  26       6.249  -0.835   2.479  0.60  6.21           H  
ATOM    433  H  BPHE A  26       6.176  -0.799   2.456  0.40  8.00           H  
ATOM    434  HA APHE A  26       7.795   0.053   4.532  0.60  6.63           H  
ATOM    435  HA BPHE A  26       7.681   0.081   4.556  0.40  7.05           H  
ATOM    436  HB2APHE A  26       5.009  -0.506   4.663  0.60  7.63           H  
ATOM    437  HB2BPHE A  26       5.021  -0.912   4.793  0.40  8.09           H  
ATOM    438  HB3APHE A  26       5.908  -0.418   5.967  0.60  7.63           H  
ATOM    439  HB3BPHE A  26       5.889  -0.313   5.979  0.40  8.09           H  
ATOM    440  HD1APHE A  26       3.535   1.298   4.928  0.60 11.46           H  
ATOM    441  HD1BPHE A  26       5.814   2.014   6.432  0.40 11.10           H  
ATOM    442  HD2APHE A  26       7.457   1.990   5.400  0.60 13.02           H  
ATOM    443  HD2BPHE A  26       4.148   0.652   3.053  0.40  8.45           H  
ATOM    444  HE1APHE A  26       3.108   3.565   5.079  0.60 14.48           H  
ATOM    445  HE1BPHE A  26       4.892   4.098   6.035  0.40 15.24           H  
ATOM    446  HE2APHE A  26       7.035   4.261   5.552  0.60 13.57           H  
ATOM    447  HE2BPHE A  26       3.242   2.728   2.677  0.40 10.15           H  
ATOM    448  HZ APHE A  26       4.875   5.051   5.393  0.60 13.07           H  
ATOM    449  HZ BPHE A  26       3.604   4.444   4.149  0.40 16.69           H  
ATOM    450  N   ALA A  27       8.249  -2.192   5.416  1.00  5.96           N  
ANISOU  450  N   ALA A  27      839    740    684   -133   -495    -46       N  
ATOM    451  CA  ALA A  27       8.630  -3.550   5.775  1.00  6.38           C  
ANISOU  451  CA  ALA A  27      916    767    742   -102   -568     30       C  
ATOM    452  C   ALA A  27       8.880  -3.617   7.278  1.00  6.41           C  
ANISOU  452  C   ALA A  27      935    770    730    -97   -493    -10       C  
ATOM    453  O   ALA A  27       9.680  -2.838   7.804  1.00  7.45           O  
ANISOU  453  O   ALA A  27     1128    928    776   -425   -617     -6       O  
ATOM    454  CB  ALA A  27       9.867  -4.001   5.023  1.00  8.30           C  
ANISOU  454  CB  ALA A  27     1188   1022    943     72   -479   -106       C  
ATOM    455  H  AALA A  27       8.668  -1.585   5.857  0.61  7.15           H  
ATOM    456  H  BALA A  27       8.620  -1.584   5.897  0.39  7.15           H  
ATOM    457  HA  ALA A  27       7.896  -4.162   5.557  1.00  7.66           H  
ATOM    458  HB1 ALA A  27      10.083  -4.898   5.288  1.00  9.96           H  
ATOM    459  HB2 ALA A  27       9.687  -3.972   4.080  1.00  9.96           H  
ATOM    460  HB3 ALA A  27      10.594  -3.411   5.236  1.00  9.96           H  
ATOM    461  N   VAL A  28       8.246  -4.574   7.916  1.00  6.22           N  
ANISOU  461  N   VAL A  28      846    774    744   -210   -577     27       N  
ATOM    462  CA  VAL A  28       8.513  -4.939   9.302  1.00  5.78           C  
ANISOU  462  CA  VAL A  28      741    794    661   -129   -498    -11       C  
ATOM    463  C   VAL A  28       9.204  -6.284   9.293  1.00  5.51           C  
ANISOU  463  C   VAL A  28      703    703    688   -114   -390    -28       C  
ATOM    464  O   VAL A  28       8.802  -7.181   8.572  1.00  7.23           O  
ANISOU  464  O   VAL A  28     1036    735    975      5   -735    -85       O  
ATOM    465  CB  VAL A  28       7.207  -4.983  10.114  1.00  6.21           C  
ANISOU  465  CB  VAL A  28      644    831    884    -81   -431    -41       C  
ATOM    466  CG1 VAL A  28       7.415  -5.642  11.474  1.00  7.13           C  
ANISOU  466  CG1 VAL A  28      746   1014    950   -172   -331     89       C  
ATOM    467  CG2 VAL A  28       6.654  -3.589  10.275  1.00  8.67           C  
ANISOU  467  CG2 VAL A  28     1020   1081   1193     -4   -304   -123       C  
ATOM    468  H   VAL A  28       7.627  -5.051   7.557  1.00  7.47           H  
ATOM    469  HA  VAL A  28       9.114  -4.279   9.707  1.00  6.94           H  
ATOM    470  HB  VAL A  28       6.546  -5.513   9.622  1.00  7.45           H  
ATOM    471 HG11 VAL A  28       6.581  -5.650  11.948  1.00  8.56           H  
ATOM    472 HG12 VAL A  28       7.725  -6.541  11.341  1.00  8.56           H  
ATOM    473 HG13 VAL A  28       8.068  -5.140  11.967  1.00  8.56           H  
ATOM    474 HG21 VAL A  28       5.840  -3.633  10.783  1.00 10.40           H  
ATOM    475 HG22 VAL A  28       7.299  -3.048  10.736  1.00 10.40           H  
ATOM    476 HG23 VAL A  28       6.478  -3.221   9.406  1.00 10.40           H  
ATOM    477  N   LYS A  29      10.220  -6.449  10.132  1.00  5.38           N  
ANISOU  477  N   LYS A  29      641    731    674   -123   -415      5       N  
ATOM    478  CA  LYS A  29      10.790  -7.752  10.394  1.00  5.87           C  
ANISOU  478  CA  LYS A  29      713    812    707    -18   -361     50       C  
ATOM    479  C   LYS A  29      10.397  -8.132  11.804  1.00  5.51           C  
ANISOU  479  C   LYS A  29      584    790    721    -48   -379     58       C  
ATOM    480  O   LYS A  29      10.467  -7.304  12.722  1.00  5.69           O  
ANISOU  480  O   LYS A  29      767    729    667   -125   -389     20       O  
ATOM    481  CB  LYS A  29      12.303  -7.729  10.235  1.00  6.74           C  
ANISOU  481  CB  LYS A  29      679    990    892     51   -350    -96       C  
ATOM    482  CG  LYS A  29      12.718  -7.395   8.806  1.00  9.12           C  
ANISOU  482  CG  LYS A  29     1171   1411    884     14   -307   -181       C  
ATOM    483  CD  LYS A  29      14.195  -7.346   8.615  1.00 11.60           C  
ANISOU  483  CD  LYS A  29     1270   1806   1330   -105      5   -289       C  
ATOM    484  CE  LYS A  29      14.558  -6.998   7.180  1.00 15.35           C  
ANISOU  484  CE  LYS A  29     1802   2193   1838   -557    112   -476       C  
ATOM    485  NZ  LYS A  29      15.986  -6.672   7.020  1.00 15.75           N  
ANISOU  485  NZ  LYS A  29     1551   2336   2098   -769    153   -526       N  
ATOM    486  H   LYS A  29      10.597  -5.809  10.566  1.00  6.46           H  
ATOM    487  HA  LYS A  29      10.416  -8.411   9.772  1.00  7.05           H  
ATOM    488  HB2 LYS A  29      12.675  -7.054  10.824  1.00  8.09           H  
ATOM    489  HB3 LYS A  29      12.661  -8.602  10.458  1.00  8.09           H  
ATOM    490  HG2 LYS A  29      12.362  -8.072   8.209  1.00 10.95           H  
ATOM    491  HG3 LYS A  29      12.358  -6.525   8.570  1.00 10.95           H  
ATOM    492  HD2 LYS A  29      14.571  -6.668   9.197  1.00 13.92           H  
ATOM    493  HD3 LYS A  29      14.573  -8.215   8.822  1.00 13.92           H  
ATOM    494  HE2 LYS A  29      14.357  -7.756   6.609  1.00 18.42           H  
ATOM    495  HE3 LYS A  29      14.041  -6.226   6.901  1.00 18.42           H  
ATOM    496  HZ1 LYS A  29      16.160  -6.474   6.170  1.00 18.90           H  
ATOM    497  HZ2 LYS A  29      16.197  -5.973   7.529  1.00 18.90           H  
ATOM    498  HZ3 LYS A  29      16.485  -7.368   7.263  1.00 18.90           H  
ATOM    499  N   ALA A  30       9.948  -9.357  11.981  1.00  6.09           N  
ANISOU  499  N   ALA A  30      780    769    764    -55   -336    -28       N  
ATOM    500  CA  ALA A  30       9.487  -9.815  13.289  1.00  6.35           C  
ANISOU  500  CA  ALA A  30      720    842    852   -128   -346    -14       C  
ATOM    501  C   ALA A  30       9.561 -11.318  13.365  1.00  8.96           C  
ANISOU  501  C   ALA A  30     1248    859   1297   -219    127     18       C  
ATOM    502  O   ALA A  30       9.563 -12.000  12.348  1.00 12.77           O  
ANISOU  502  O   ALA A  30     2621    965   1266   -471    409   -174       O  
ATOM    503  CB  ALA A  30       8.054  -9.347  13.550  1.00  7.24           C  
ANISOU  503  CB  ALA A  30      808   1078    865    -60   -369   -120       C  
ATOM    504  H   ALA A  30       9.896  -9.951  11.361  1.00  7.31           H  
ATOM    505  HA  ALA A  30      10.066  -9.442  13.986  1.00  7.62           H  
ATOM    506  HB1 ALA A  30       7.775  -9.660  14.413  1.00  8.69           H  
ATOM    507  HB2 ALA A  30       8.029  -8.388  13.526  1.00  8.69           H  
ATOM    508  HB3 ALA A  30       7.479  -9.707  12.870  1.00  8.69           H  
ATOM    509  N   THR A  31       9.643 -11.841  14.583  1.00  9.64           N  
ANISOU  509  N   THR A  31     1229    956   1476   -115    174    362       N  
ATOM    510  CA  THR A  31       9.703 -13.270  14.794  1.00 13.26           C  
ANISOU  510  CA  THR A  31     1278   1522   2239     48    342    673       C  
ATOM    511  C   THR A  31       8.566 -13.697  15.727  1.00  7.96           C  
ANISOU  511  C   THR A  31     1022    907   1094    -55   -156    223       C  
ATOM    512  O   THR A  31       7.949 -12.866  16.359  1.00  9.18           O  
ANISOU  512  O   THR A  31     1467    774   1247   -202    135      2       O  
ATOM    513  CB  THR A  31      11.053 -13.649  15.366  1.00 23.88           C  
ANISOU  513  CB  THR A  31     1503   3197   4373    138    348   1906       C  
ATOM    514  OG1 THR A  31      11.230 -12.954  16.598  1.00 26.72           O  
ANISOU  514  OG1 THR A  31     1902   3193   5056    -26  -1334   2439       O  
ATOM    515  CG2 THR A  31      12.162 -13.273  14.398  1.00 44.11           C  
ANISOU  515  CG2 THR A  31     5095   5556   6108    -44    423   1904       C  
ATOM    516  H   THR A  31       9.665 -11.379  15.308  1.00 11.56           H  
ATOM    517  HA  THR A  31       9.589 -13.731  13.936  1.00 15.92           H  
ATOM    518  HB  THR A  31      11.086 -14.606  15.522  1.00 28.65           H  
ATOM    519  HG1 THR A  31      11.956 -13.145  16.926  1.00 32.06           H  
ATOM    520 HG21 THR A  31      13.015 -13.516  14.766  1.00 52.93           H  
ATOM    521 HG22 THR A  31      12.040 -13.734  13.564  1.00 52.93           H  
ATOM    522 HG23 THR A  31      12.150 -12.327  14.237  1.00 52.93           H  
ATOM    523  N   GLY A  32       8.300 -14.994  15.787  1.00  9.59           N  
ANISOU  523  N   GLY A  32     1336    963   1345   -196     17    141       N  
ATOM    524  CA  GLY A  32       7.305 -15.535  16.689  1.00  9.25           C  
ANISOU  524  CA  GLY A  32     1391   1029   1093   -166     76    146       C  
ATOM    525  C   GLY A  32       7.116 -17.000  16.416  1.00  7.81           C  
ANISOU  525  C   GLY A  32     1128    807   1030   -100   -200    128       C  
ATOM    526  O   GLY A  32       7.452 -17.495  15.341  1.00  8.74           O  
ANISOU  526  O   GLY A  32     1356    849   1115    -62    -68    -21       O  
ATOM    527  H   GLY A  32       8.691 -15.589  15.305  1.00 11.51           H  
ATOM    528  HA2 GLY A  32       7.592 -15.420  17.609  1.00 11.09           H  
ATOM    529  HA3 GLY A  32       6.458 -15.078  16.563  1.00 11.09           H  
ATOM    530  N   GLU A  33       6.537 -17.693  17.387  1.00  7.74           N  
ANISOU  530  N   GLU A  33     1023    774   1143   -118   -243    175       N  
ATOM    531  CA  GLU A  33       6.164 -19.099  17.256  1.00  8.19           C  
ANISOU  531  CA  GLU A  33     1008    849   1253    -50   -253    143       C  
ATOM    532  C   GLU A  33       4.729 -19.269  17.738  1.00  8.12           C  
ANISOU  532  C   GLU A  33     1057    707   1322   -152   -347    157       C  
ATOM    533  O   GLU A  33       4.432 -18.982  18.899  1.00  8.60           O  
ANISOU  533  O   GLU A  33     1327    803   1138   -128   -267    103       O  
ATOM    534  CB  GLU A  33       7.089 -19.973  18.109  1.00 10.25           C  
ANISOU  534  CB  GLU A  33     1074   1120   1701     32   -290    233       C  
ATOM    535  CG  GLU A  33       6.616 -21.406  18.273  1.00 11.20           C  
ANISOU  535  CG  GLU A  33     1208   1253   1794     26   -309    228       C  
ATOM    536  CD  GLU A  33       6.402 -22.130  16.964  1.00 15.27           C  
ANISOU  536  CD  GLU A  33     1735   1156   2911    184     86    192       C  
ATOM    537  OE1 GLU A  33       7.227 -22.006  16.034  1.00 15.07           O  
ANISOU  537  OE1 GLU A  33     2469   1358   1898   -108   -514   -139       O  
ATOM    538  OE2 GLU A  33       5.382 -22.826  16.850  1.00 17.83           O  
ANISOU  538  OE2 GLU A  33     1949   1248   3579     -6     22   -379       O  
ATOM    539  H   GLU A  33       6.342 -17.362  18.156  1.00  9.29           H  
ATOM    540  HA  GLU A  33       6.227 -19.381  16.319  1.00  9.82           H  
ATOM    541  HB2 GLU A  33       7.965 -19.997  17.694  1.00 12.30           H  
ATOM    542  HB3 GLU A  33       7.156 -19.582  18.994  1.00 12.30           H  
ATOM    543  HG2 GLU A  33       7.281 -21.898  18.779  1.00 13.44           H  
ATOM    544  HG3 GLU A  33       5.773 -21.404  18.753  1.00 13.44           H  
ATOM    545  N   PRO A  34       3.816 -19.713  16.861  1.00  8.30           N  
ANISOU  545  N   PRO A  34      986    918   1251    -68   -239    125       N  
ATOM    546  CA  PRO A  34       3.983 -19.989  15.441  1.00  9.58           C  
ANISOU  546  CA  PRO A  34     1227   1134   1279    -29   -475      3       C  
ATOM    547  C   PRO A  34       4.387 -18.768  14.636  1.00  8.86           C  
ANISOU  547  C   PRO A  34     1273    924   1170    288   -408     61       C  
ATOM    548  O   PRO A  34       4.250 -17.640  15.089  1.00  8.03           O  
ANISOU  548  O   PRO A  34     1108    849   1094    221   -265     52       O  
ATOM    549  CB  PRO A  34       2.591 -20.476  15.017  1.00 11.54           C  
ANISOU  549  CB  PRO A  34     1447   1572   1366   -305   -542    -49       C  
ATOM    550  CG  PRO A  34       1.961 -20.913  16.273  1.00 13.57           C  
ANISOU  550  CG  PRO A  34     1396   1729   2032   -538   -396   -244       C  
ATOM    551  CD  PRO A  34       2.443 -19.988  17.311  1.00 10.62           C  
ANISOU  551  CD  PRO A  34     1142   1359   1534   -320   -338     -5       C  
ATOM    552  HA  PRO A  34       4.638 -20.705  15.304  1.00 11.49           H  
ATOM    553  HB2 PRO A  34       2.094 -19.746  14.617  1.00 13.85           H  
ATOM    554  HB3 PRO A  34       2.676 -21.218  14.397  1.00 13.85           H  
ATOM    555  HG2 PRO A  34       0.996 -20.857  16.189  1.00 16.29           H  
ATOM    556  HG3 PRO A  34       2.234 -21.822  16.474  1.00 16.29           H  
ATOM    557  HD2 PRO A  34       1.915 -19.174  17.316  1.00 12.75           H  
ATOM    558  HD3 PRO A  34       2.447 -20.420  18.179  1.00 12.75           H  
ATOM    559  N   ARG A  35       4.867 -18.997  13.422  1.00 10.11           N  
ANISOU  559  N   ARG A  35     1633   1112   1094    379   -197     -8       N  
ATOM    560  CA  ARG A  35       5.190 -17.888  12.534  1.00 11.30           C  
ANISOU  560  CA  ARG A  35     1654   1309   1329    477    174    -34       C  
ATOM    561  C   ARG A  35       3.981 -16.975  12.435  1.00  9.84           C  
ANISOU  561  C   ARG A  35     1867   1024    849    335   -118     39       C  
ATOM    562  O   ARG A  35       2.880 -17.419  12.094  1.00 10.38           O  
ANISOU  562  O   ARG A  35     1661   1151   1133    238   -369      9       O  
ATOM    563  CB  ARG A  35       5.580 -18.403  11.144  1.00 15.66           C  
ANISOU  563  CB  ARG A  35     2469   1925   1556    842    434    123       C  
ATOM    564  CG  ARG A  35       5.931 -17.301  10.140  1.00 18.98           C  
ANISOU  564  CG  ARG A  35     3731   2091   1389    920    467    118       C  
ATOM    565  H   ARG A  35       5.013 -19.777  13.089  1.00 12.13           H  
ATOM    566  HA  ARG A  35       5.941 -17.377  12.903  1.00 13.55           H  
ATOM    567  HB2 ARG A  35       6.354 -18.980  11.232  1.00 18.79           H  
ATOM    568  HB3 ARG A  35       4.836 -18.908  10.780  1.00 18.79           H  
ATOM    569  N   PRO A  36       4.173 -15.681  12.695  1.00  8.80           N  
ANISOU  569  N   PRO A  36     1522    992    828    325   -124     88       N  
ATOM    570  CA  PRO A  36       3.010 -14.801  12.723  1.00  8.71           C  
ANISOU  570  CA  PRO A  36     1392   1067    850    311   -238     37       C  
ATOM    571  C   PRO A  36       2.604 -14.327  11.346  1.00  7.60           C  
ANISOU  571  C   PRO A  36     1291    828    770    127   -242    -16       C  
ATOM    572  O   PRO A  36       3.314 -14.543  10.355  1.00  8.35           O  
ANISOU  572  O   PRO A  36     1409    863    901     98   -237     45       O  
ATOM    573  CB  PRO A  36       3.472 -13.651  13.622  1.00 11.38           C  
ANISOU  573  CB  PRO A  36     1679   1415   1231    373   -711   -167       C  
ATOM    574  CG  PRO A  36       4.935 -13.670  13.527  1.00 11.99           C  
ANISOU  574  CG  PRO A  36     1257   1475   1823    107   -108   -231       C  
ATOM    575  CD  PRO A  36       5.378 -15.057  13.262  1.00  9.83           C  
ANISOU  575  CD  PRO A  36     1326   1254   1154     43   -310     11       C  
ATOM    576  HA  PRO A  36       2.251 -15.255  13.145  1.00 10.45           H  
ATOM    577  HB2 PRO A  36       3.116 -12.812  13.290  1.00 13.66           H  
ATOM    578  HB3 PRO A  36       3.185 -13.812  14.534  1.00 13.66           H  
ATOM    579  HG2 PRO A  36       5.212 -13.089  12.801  1.00 14.39           H  
ATOM    580  HG3 PRO A  36       5.311 -13.356  14.364  1.00 14.39           H  
ATOM    581  HD2 PRO A  36       6.101 -15.066  12.615  1.00 11.79           H  
ATOM    582  HD3 PRO A  36       5.632 -15.497  14.088  1.00 11.79           H  
ATOM    583  N   THR A  37       1.452 -13.674  11.306  1.00  7.36           N  
ANISOU  583  N   THR A  37     1152    842    804    102   -302    105       N  
ATOM    584  CA  THR A  37       0.967 -13.007  10.116  1.00  7.77           C  
ANISOU  584  CA  THR A  37     1145    966    842    -73   -407    -16       C  
ATOM    585  C   THR A  37       0.700 -11.552  10.459  1.00  6.94           C  
ANISOU  585  C   THR A  37     1125    777    737    -16   -335    -14       C  
ATOM    586  O   THR A  37       0.685 -11.169  11.629  1.00 10.40           O  
ANISOU  586  O   THR A  37     2474    784    692     16   -193    -37       O  
ATOM    587  CB  THR A  37      -0.300 -13.675   9.598  1.00 11.82           C  
ANISOU  587  CB  THR A  37     1934   1372   1185   -490   -663     42       C  
ATOM    588  OG1 THR A  37      -1.354 -13.527  10.549  1.00 13.68           O  
ANISOU  588  OG1 THR A  37     1545   1607   2045   -320   -507    292       O  
ATOM    589  CG2 THR A  37      -0.084 -15.162   9.290  1.00 15.38           C  
ANISOU  589  CG2 THR A  37     2272   1857   1716   -334   -801      4       C  
ATOM    590  H   THR A  37       0.920 -13.603  11.978  1.00  8.84           H  
ATOM    591  HA  THR A  37       1.650 -13.044   9.415  1.00  9.33           H  
ATOM    592  HB  THR A  37      -0.564 -13.240   8.773  1.00 14.18           H  
ATOM    593  HG1 THR A  37      -1.141 -13.876  11.260  1.00 16.42           H  
ATOM    594 HG21 THR A  37      -0.899 -15.551   8.967  1.00 18.46           H  
ATOM    595 HG22 THR A  37       0.597 -15.262   8.620  1.00 18.46           H  
ATOM    596 HG23 THR A  37       0.190 -15.625  10.085  1.00 18.46           H  
ATOM    597  N   ALA A  38       0.483 -10.721   9.454  1.00  6.64           N  
ANISOU  597  N   ALA A  38      942    788    793     34   -227    -82       N  
ATOM    598  CA  ALA A  38       0.330  -9.302   9.659  1.00  6.59           C  
ANISOU  598  CA  ALA A  38      941    742    820     -5   -262    -21       C  
ATOM    599  C   ALA A  38      -1.060  -8.801   9.308  1.00  6.76           C  
ANISOU  599  C   ALA A  38      940    806    822    -20   -436     64       C  
ATOM    600  O   ALA A  38      -1.689  -9.285   8.361  1.00  9.07           O  
ANISOU  600  O   ALA A  38     1414    924   1107    -10   -683    -49       O  
ATOM    601  CB  ALA A  38       1.340  -8.527   8.829  1.00  8.93           C  
ANISOU  601  CB  ALA A  38     1135   1070   1189    -92    -86   -124       C  
ATOM    602  H   ALA A  38       0.420 -10.963   8.631  1.00  7.97           H  
ATOM    603  HA  ALA A  38       0.494  -9.099  10.604  1.00  7.91           H  
ATOM    604  HB1 ALA A  38       1.217  -7.588   8.984  1.00 10.72           H  
ATOM    605  HB2 ALA A  38       2.226  -8.789   9.091  1.00 10.72           H  
ATOM    606  HB3 ALA A  38       1.200  -8.727   7.901  1.00 10.72           H  
ATOM    607  N   ILE A  39      -1.481  -7.799  10.055  1.00  6.44           N  
ANISOU  607  N   ILE A  39      759    752    936    -29   -274     69       N  
ATOM    608  CA  ILE A  39      -2.702  -7.045   9.869  1.00  8.54           C  
ANISOU  608  CA  ILE A  39      755    919   1570    -88   -319    160       C  
ATOM    609  C   ILE A  39      -2.343  -5.592   9.842  1.00  6.97           C  
ANISOU  609  C   ILE A  39      712    644   1294    -73   -417     65       C  
ATOM    610  O   ILE A  39      -1.853  -5.066  10.859  1.00  7.52           O  
ANISOU  610  O   ILE A  39     1108    663   1087   -125   -509     82       O  
ATOM    611  CB  ILE A  39      -3.674  -7.293  11.093  1.00 11.56           C  
ANISOU  611  CB  ILE A  39      807   1391   2196   -150     62    522       C  
ATOM    612  CG1 ILE A  39      -4.013  -8.767  11.171  1.00 14.42           C  
ANISOU  612  CG1 ILE A  39     1771   1748   1960   -596   -231    229       C  
ATOM    613  CG2 ILE A  39      -4.936  -6.451  10.963  1.00 13.29           C  
ANISOU  613  CG2 ILE A  39     1171   1708   2168    116    -22    187       C  
ATOM    614  CD1 ILE A  39      -4.592  -9.194   9.903  1.00 21.51           C  
ANISOU  614  CD1 ILE A  39     3564   2181   2429    -71   -216     53       C  
ATOM    615  H   ILE A  39      -1.035  -7.518  10.734  1.00  7.73           H  
ATOM    616  HA  ILE A  39      -3.146  -7.296   9.032  1.00 10.25           H  
ATOM    617  HB  ILE A  39      -3.216  -7.038  11.909  1.00 13.88           H  
ATOM    618 HG21 ILE A  39      -5.505  -6.622  11.717  1.00 15.94           H  
ATOM    619 HG22 ILE A  39      -4.691  -5.523  10.940  1.00 15.94           H  
ATOM    620 HG23 ILE A  39      -5.388  -6.690  10.150  1.00 15.94           H  
ATOM    621  N   TRP A  40      -2.570  -4.900   8.714  1.00  6.27           N  
ANISOU  621  N   TRP A  40      760    726    897    -78   -285    -24       N  
ATOM    622  CA  TRP A  40      -2.177  -3.506   8.579  1.00  5.65           C  
ANISOU  622  CA  TRP A  40      639    695    811    -48   -287      0       C  
ATOM    623  C   TRP A  40      -3.398  -2.605   8.627  1.00  5.28           C  
ANISOU  623  C   TRP A  40      575    671    759   -112   -188    -52       C  
ATOM    624  O   TRP A  40      -4.487  -2.968   8.136  1.00  5.88           O  
ANISOU  624  O   TRP A  40      699    724    811   -123   -241    -21       O  
ATOM    625  CB  TRP A  40      -1.445  -3.266   7.252  1.00  6.41           C  
ANISOU  625  CB  TRP A  40      776    822    839    -11   -230      4       C  
ATOM    626  CG  TRP A  40      -0.115  -3.938   7.109  1.00  5.97           C  
ANISOU  626  CG  TRP A  40      738    718    812    -18   -266    -17       C  
ATOM    627  CD1 TRP A  40       0.128  -5.253   6.867  1.00  6.11           C  
ANISOU  627  CD1 TRP A  40      666    792    862    -71   -209    -34       C  
ATOM    628  CD2 TRP A  40       1.159  -3.296   7.147  1.00  5.78           C  
ANISOU  628  CD2 TRP A  40      832    726    640   -107   -184     89       C  
ATOM    629  NE1 TRP A  40       1.487  -5.474   6.715  1.00  6.36           N  
ANISOU  629  NE1 TRP A  40      769    791    857     27   -182    -88       N  
ATOM    630  CE2 TRP A  40       2.133  -4.282   6.871  1.00  5.43           C  
ANISOU  630  CE2 TRP A  40      742    725    597    -67   -225     -6       C  
ATOM    631  CE3 TRP A  40       1.572  -1.992   7.353  1.00  6.40           C  
ANISOU  631  CE3 TRP A  40     1020    800    612   -100   -310    118       C  
ATOM    632  CZ2 TRP A  40       3.499  -3.992   6.797  1.00  5.92           C  
ANISOU  632  CZ2 TRP A  40      773    897    578    -24   -273    135       C  
ATOM    633  CZ3 TRP A  40       2.930  -1.704   7.262  1.00  7.36           C  
ANISOU  633  CZ3 TRP A  40     1126    956    716   -385   -411    165       C  
ATOM    634  CH2 TRP A  40       3.871  -2.702   6.986  1.00  6.54           C  
ANISOU  634  CH2 TRP A  40      782   1024    680   -164   -387    219       C  
ATOM    635  H   TRP A  40      -2.951  -5.225   8.015  1.00  7.53           H  
ATOM    636  HA  TRP A  40      -1.579  -3.260   9.315  1.00  6.78           H  
ATOM    637  HB2 TRP A  40      -2.009  -3.583   6.530  1.00  7.70           H  
ATOM    638  HB3 TRP A  40      -1.299  -2.312   7.152  1.00  7.70           H  
ATOM    639  HD1 TRP A  40      -0.528  -5.906   6.781  1.00  7.33           H  
ATOM    640  HE1 TRP A  40       1.859  -6.231   6.549  1.00  7.63           H  
ATOM    641  HE3 TRP A  40       0.950  -1.312   7.479  1.00  7.68           H  
ATOM    642  HZ2 TRP A  40       4.128  -4.661   6.650  1.00  7.10           H  
ATOM    643  HZ3 TRP A  40       3.219  -0.830   7.392  1.00  8.84           H  
ATOM    644  HH2 TRP A  40       4.775  -2.484   6.982  1.00  7.85           H  
ATOM    645  N   THR A  41      -3.196  -1.412   9.150  1.00  5.43           N  
ANISOU  645  N   THR A  41      527    677    858    -68   -247      3       N  
ATOM    646  CA  THR A  41      -4.201  -0.381   9.174  1.00  5.46           C  
ANISOU  646  CA  THR A  41      547    771    756    -83   -155    -68       C  
ATOM    647  C   THR A  41      -3.614   0.951   8.737  1.00  5.38           C  
ANISOU  647  C   THR A  41      542    678    823    -24   -213    -64       C  
ATOM    648  O   THR A  41      -2.438   1.242   8.918  1.00  6.19           O  
ANISOU  648  O   THR A  41      543    764   1046    -95   -229     34       O  
ATOM    649  CB  THR A  41      -4.872  -0.224  10.557  1.00  6.51           C  
ANISOU  649  CB  THR A  41      588    973    912   -180   -151   -143       C  
ATOM    650  OG1 THR A  41      -3.858   0.058  11.509  1.00  8.69           O  
ANISOU  650  OG1 THR A  41      736   1543   1021   -358   -133   -301       O  
ATOM    651  CG2 THR A  41      -5.629  -1.447  10.970  1.00  7.12           C  
ANISOU  651  CG2 THR A  41      794    990    921   -175   -141     93       C  
ATOM    652  H   THR A  41      -2.453  -1.170   9.511  1.00  6.51           H  
ATOM    653  HA  THR A  41      -4.903  -0.618   8.532  1.00  6.55           H  
ATOM    654  HB  THR A  41      -5.494   0.520  10.526  1.00  7.81           H  
ATOM    655  HG1 THR A  41      -3.469   0.751  11.308  1.00 10.42           H  
ATOM    656 HG21 THR A  41      -6.029  -1.310  11.831  1.00  8.54           H  
ATOM    657 HG22 THR A  41      -6.320  -1.636  10.331  1.00  8.54           H  
ATOM    658 HG23 THR A  41      -5.035  -2.200  11.018  1.00  8.54           H  
ATOM    659  N   LYS A  42      -4.496   1.770   8.169  1.00  5.76           N  
ANISOU  659  N   LYS A  42      478    790    922   -105   -156    -11       N  
ATOM    660  CA ALYS A  42      -4.236   3.132   7.766  0.50  6.31           C  
ANISOU  660  CA ALYS A  42      397    942   1059    -52   -235    111       C  
ATOM    661  CA BLYS A  42      -4.202   3.149   7.837  0.50  7.69           C  
ANISOU  661  CA BLYS A  42      906    961   1056    -44    170    219       C  
ATOM    662  C   LYS A  42      -5.164   4.016   8.615  1.00  6.95           C  
ANISOU  662  C   LYS A  42      665    798   1177    -29    -62     90       C  
ATOM    663  O   LYS A  42      -6.388   3.935   8.440  1.00  6.88           O  
ANISOU  663  O   LYS A  42      583    825   1206    -18   -114     26       O  
ATOM    664  CB ALYS A  42      -4.553   3.283   6.270  0.50  9.66           C  
ANISOU  664  CB ALYS A  42     1183   1489    996    -68   -383    580       C  
ATOM    665  CB BLYS A  42      -4.396   3.458   6.357  0.50  9.22           C  
ANISOU  665  CB BLYS A  42      460   1408   1634    -72    197    500       C  
ATOM    666  CG ALYS A  42      -3.960   4.496   5.611  0.50 17.08           C  
ANISOU  666  CG ALYS A  42     1738   2242   2510   -160   -988   1349       C  
ATOM    667  CG BLYS A  42      -4.247   4.963   6.088  0.50 14.52           C  
ANISOU  667  CG BLYS A  42     1055   2022   2440   -452   -592   1362       C  
ATOM    668  CD ALYS A  42      -4.864   5.683   5.751  0.50 18.45           C  
ANISOU  668  CD ALYS A  42     1400   2457   3152   -263  -1101   1391       C  
ATOM    669  CD BLYS A  42      -4.728   5.396   4.721  0.50 17.10           C  
ANISOU  669  CD BLYS A  42     1406   2320   2770   -757   -999   1386       C  
ATOM    670  CE ALYS A  42      -4.293   6.860   4.994  0.50 16.05           C  
ANISOU  670  CE ALYS A  42     1569   2283   2247   -110   -341   1304       C  
ATOM    671  CE BLYS A  42      -4.411   6.857   4.491  0.50 16.79           C  
ANISOU  671  CE BLYS A  42     1326   2336   2715   -161   -953   1042       C  
ATOM    672  NZ ALYS A  42      -5.144   8.051   5.136  0.50 15.22           N  
ANISOU  672  NZ ALYS A  42     1513   2208   2062     89   -776    585       N  
ATOM    673  NZ BLYS A  42      -5.178   7.769   5.378  0.50 16.83           N  
ANISOU  673  NZ BLYS A  42     1582   2348   2467    380   -609    529       N  
ATOM    674  H  ALYS A  42      -5.305   1.532   8.002  0.50  6.92           H  
ATOM    675  H  BLYS A  42      -5.298   1.535   7.963  0.50  6.92           H  
ATOM    676  HA ALYS A  42      -3.301   3.372   7.934  0.50  7.57           H  
ATOM    677  HA BLYS A  42      -3.284   3.372   8.096  0.50  9.23           H  
ATOM    678  HB2ALYS A  42      -4.216   2.502   5.803  0.50 11.59           H  
ATOM    679  HB2BLYS A  42      -3.726   2.987   5.839  0.50 11.06           H  
ATOM    680  HB3ALYS A  42      -5.516   3.334   6.163  0.50 11.59           H  
ATOM    681  HB3BLYS A  42      -5.287   3.186   6.085  0.50 11.06           H  
ATOM    682  HG2ALYS A  42      -3.111   4.707   6.031  0.50 20.50           H  
ATOM    683  HG2BLYS A  42      -4.761   5.451   6.750  0.50 17.43           H  
ATOM    684  HG3ALYS A  42      -3.833   4.318   4.666  0.50 20.50           H  
ATOM    685  HG3BLYS A  42      -3.309   5.201   6.160  0.50 17.43           H  
ATOM    686  HD2ALYS A  42      -5.736   5.472   5.382  0.50 22.13           H  
ATOM    687  HD2BLYS A  42      -4.279   4.872   4.039  0.50 20.52           H  
ATOM    688  HD3ALYS A  42      -4.940   5.925   6.687  0.50 22.13           H  
ATOM    689  HD3BLYS A  42      -5.689   5.277   4.663  0.50 20.52           H  
ATOM    690  HE2ALYS A  42      -3.414   7.071   5.345  0.50 19.26           H  
ATOM    691  HE2BLYS A  42      -3.466   7.004   4.657  0.50 20.14           H  
ATOM    692  HE3ALYS A  42      -4.235   6.638   4.052  0.50 19.26           H  
ATOM    693  HE3BLYS A  42      -4.624   7.085   3.573  0.50 20.14           H  
ATOM    694  HZ1ALYS A  42      -4.791   8.732   4.685  0.50 18.26           H  
ATOM    695  HZ1BLYS A  42      -4.959   8.615   5.207  0.50 20.20           H  
ATOM    696  HZ2ALYS A  42      -5.958   7.883   4.818  0.50 18.26           H  
ATOM    697  HZ2BLYS A  42      -6.051   7.663   5.241  0.50 20.20           H  
ATOM    698  HZ3ALYS A  42      -5.210   8.277   5.995  0.50 18.26           H  
ATOM    699  HZ3BLYS A  42      -4.995   7.589   6.230  0.50 20.20           H  
ATOM    700  N   ASP A  43      -4.626   4.816   9.513  1.00  7.59           N  
ANISOU  700  N   ASP A  43      670    856   1359    -79    -45    -65       N  
ATOM    701  CA  ASP A  43      -5.451   5.624  10.394  1.00  7.91           C  
ANISOU  701  CA  ASP A  43      746    957   1301    -56    -67   -163       C  
ATOM    702  C   ASP A  43      -6.570   4.800  11.013  1.00  7.05           C  
ANISOU  702  C   ASP A  43      654    905   1120   -124    -90   -162       C  
ATOM    703  O   ASP A  43      -7.711   5.248  11.129  1.00  7.62           O  
ANISOU  703  O   ASP A  43      615    876   1406    -27    -29   -170       O  
ATOM    704  CB  ASP A  43      -5.957   6.861   9.660  1.00  8.98           C  
ANISOU  704  CB  ASP A  43      919   1049   1443      9     -7    -34       C  
ATOM    705  CG  ASP A  43      -4.796   7.784   9.269  1.00 10.57           C  
ANISOU  705  CG  ASP A  43     1479   1069   1467    -25    116   -150       C  
ATOM    706  OD1 ASP A  43      -4.706   8.152   8.100  1.00 13.75           O  
ANISOU  706  OD1 ASP A  43     2295   1308   1620   -493    307    -44       O  
ATOM    707  OD2 ASP A  43      -3.974   8.091  10.147  1.00 10.52           O  
ANISOU  707  OD2 ASP A  43      990   1018   1988   -104     97   -157       O  
ATOM    708  H   ASP A  43      -3.781   4.912   9.635  1.00  9.11           H  
ATOM    709  HA  ASP A  43      -4.888   5.939  11.131  1.00  9.49           H  
ATOM    710  HB2 ASP A  43      -6.417   6.590   8.850  1.00 10.77           H  
ATOM    711  HB3 ASP A  43      -6.558   7.356  10.239  1.00 10.77           H  
ATOM    712  N   GLY A  44      -6.212   3.589  11.445  1.00  6.94           N  
ANISOU  712  N   GLY A  44      609    924   1106    -92   -144   -142       N  
ATOM    713  CA  GLY A  44      -7.139   2.707  12.113  1.00  7.64           C  
ANISOU  713  CA  GLY A  44      688   1070   1145    -71   -202     93       C  
ATOM    714  C   GLY A  44      -8.089   1.925  11.232  1.00  7.62           C  
ANISOU  714  C   GLY A  44      590   1026   1278    -74   -125    153       C  
ATOM    715  O   GLY A  44      -8.888   1.192  11.781  1.00  9.93           O  
ANISOU  715  O   GLY A  44      777   1188   1808   -334   -270    497       O  
ATOM    716  H   GLY A  44      -5.423   3.260  11.357  1.00  8.33           H  
ATOM    717  HA2 GLY A  44      -6.632   2.067  12.637  1.00  9.17           H  
ATOM    718  HA3 GLY A  44      -7.675   3.232  12.727  1.00  9.17           H  
ATOM    719  N   LYS A  45      -8.016   2.101   9.907  1.00  7.13           N  
ANISOU  719  N   LYS A  45      466    988   1253    -42   -135    -12       N  
ATOM    720  CA  LYS A  45      -8.890   1.444   8.951  1.00  8.56           C  
ANISOU  720  CA  LYS A  45      548   1317   1388    -67   -496     26       C  
ATOM    721  C   LYS A  45      -8.189   0.289   8.297  1.00  6.35           C  
ANISOU  721  C   LYS A  45      539   1046    827   -156   -324     72       C  
ATOM    722  O   LYS A  45      -6.991   0.329   8.058  1.00  7.04           O  
ANISOU  722  O   LYS A  45      530    999   1145   -136   -249     70       O  
ATOM    723  CB  LYS A  45      -9.271   2.421   7.831  1.00 13.06           C  
ANISOU  723  CB  LYS A  45      905   2350   1708     92   -782    157       C  
ATOM    724  CG  LYS A  45     -10.183   3.528   8.264  1.00 28.76           C  
ANISOU  724  CG  LYS A  45     3461   4517   2948    -13  -2104    186       C  
ATOM    725  CD  LYS A  45     -10.796   4.255   7.077  1.00 52.18           C  
ANISOU  725  CD  LYS A  45     6218   7406   6201    280  -2365    333       C  
ATOM    726  CE  LYS A  45      -9.849   5.294   6.516  1.00 71.04           C  
ANISOU  726  CE  LYS A  45     8495   9919   8579    307  -1887    304       C  
ATOM    727  NZ  LYS A  45     -10.507   6.153   5.497  1.00 85.14           N  
ANISOU  727  NZ  LYS A  45    10200  11788  10363    266  -1788    268       N  
ATOM    728  H   LYS A  45      -7.442   2.620   9.533  1.00  8.55           H  
ATOM    729  HA  LYS A  45      -9.703   1.123   9.394  1.00 10.28           H  
ATOM    730  HB2 LYS A  45      -8.461   2.825   7.482  1.00 15.67           H  
ATOM    731  HB3 LYS A  45      -9.720   1.927   7.127  1.00 15.67           H  
ATOM    732  HG2 LYS A  45     -10.904   3.157   8.797  1.00 34.51           H  
ATOM    733  HG3 LYS A  45      -9.678   4.172   8.785  1.00 34.51           H  
ATOM    734  HD2 LYS A  45     -10.993   3.614   6.376  1.00 62.61           H  
ATOM    735  HD3 LYS A  45     -11.608   4.704   7.360  1.00 62.61           H  
ATOM    736  HE2 LYS A  45      -9.538   5.864   7.237  1.00 85.25           H  
ATOM    737  HE3 LYS A  45      -9.098   4.847   6.096  1.00 85.25           H  
ATOM    738  HZ1 LYS A  45      -9.928   6.753   5.186  1.00102.17           H  
ATOM    739  HZ2 LYS A  45     -10.798   5.654   4.820  1.00102.17           H  
ATOM    740  HZ3 LYS A  45     -11.199   6.579   5.860  1.00102.17           H  
ATOM    741  N   ALA A  46      -8.946  -0.721   7.899  1.00  6.66           N  
ANISOU  741  N   ALA A  46      607   1040    884   -148   -198    -70       N  
ATOM    742  CA  ALA A  46      -8.353  -1.897   7.306  1.00  7.14           C  
ANISOU  742  CA  ALA A  46      671   1186    854   -271   -135   -111       C  
ATOM    743  C   ALA A  46      -7.647  -1.577   5.987  1.00  7.86           C  
ANISOU  743  C   ALA A  46      711   1567    708   -202   -181    -56       C  
ATOM    744  O   ALA A  46      -8.176  -0.866   5.141  1.00 10.91           O  
ANISOU  744  O   ALA A  46     1083   2225    837    327   -397    249       O  
ATOM    745  CB  ALA A  46      -9.405  -2.947   7.047  1.00  9.46           C  
ANISOU  745  CB  ALA A  46      914   1320   1359   -183    -37   -382       C  
ATOM    746  H   ALA A  46      -9.804  -0.746   7.961  1.00  7.99           H  
ATOM    747  HA  ALA A  46      -7.692  -2.271   7.925  1.00  8.56           H  
ATOM    748  HB1 ALA A  46      -8.987  -3.717   6.654  1.00 11.35           H  
ATOM    749  HB2 ALA A  46      -9.817  -3.188   7.880  1.00 11.35           H  
ATOM    750  HB3 ALA A  46     -10.062  -2.589   6.446  1.00 11.35           H  
ATOM    751  N   ILE A  47      -6.477  -2.165   5.831  1.00  7.50           N  
ANISOU  751  N   ILE A  47      751   1326    774   -191   -150    -83       N  
ATOM    752  CA  ILE A  47      -5.739  -2.248   4.578  1.00  8.37           C  
ANISOU  752  CA  ILE A  47      926   1356    897    -60    -80   -124       C  
ATOM    753  C   ILE A  47      -5.895  -3.679   4.095  1.00  8.60           C  
ANISOU  753  C   ILE A  47      998   1540    730     55   -193    -17       C  
ATOM    754  O   ILE A  47      -5.562  -4.647   4.833  1.00 11.27           O  
ANISOU  754  O   ILE A  47     1600   1722    960     45   -434    -15       O  
ATOM    755  CB  ILE A  47      -4.245  -1.931   4.825  1.00  8.58           C  
ANISOU  755  CB  ILE A  47      869   1425    965     78    -27      5       C  
ATOM    756  CG1 ILE A  47      -4.091  -0.460   5.109  1.00  8.79           C  
ANISOU  756  CG1 ILE A  47      895   1357   1087   -197   -104     55       C  
ATOM    757  CG2 ILE A  47      -3.396  -2.388   3.668  1.00 11.02           C  
ANISOU  757  CG2 ILE A  47     1234   1673   1279     76     78    -28       C  
ATOM    758  CD1 ILE A  47      -2.703  -0.031   5.483  1.00 10.27           C  
ANISOU  758  CD1 ILE A  47      961   1406   1537   -180   -241     -7       C  
ATOM    759  H   ILE A  47      -6.063  -2.549   6.479  1.00  9.00           H  
ATOM    760  HA  ILE A  47      -6.107  -1.629   3.913  1.00 10.04           H  
ATOM    761  HB  ILE A  47      -3.962  -2.419   5.614  1.00 10.29           H  
ATOM    762 HG12 ILE A  47      -4.347   0.037   4.316  1.00 10.54           H  
ATOM    763 HG13 ILE A  47      -4.679  -0.224   5.844  1.00 10.54           H  
ATOM    764 HG21 ILE A  47      -2.478  -2.177   3.853  1.00 13.22           H  
ATOM    765 HG22 ILE A  47      -3.499  -3.337   3.561  1.00 13.22           H  
ATOM    766 HG23 ILE A  47      -3.683  -1.935   2.872  1.00 13.22           H  
ATOM    767 HD11 ILE A  47      -2.701   0.915   5.645  1.00 12.33           H  
ATOM    768 HD12 ILE A  47      -2.435  -0.499   6.277  1.00 12.33           H  
ATOM    769 HD13 ILE A  47      -2.106  -0.241   4.761  1.00 12.33           H  
ATOM    770  N  ATHR A  48      -6.439  -3.834   2.888  0.35 10.44           N  
ANISOU  770  N  ATHR A  48     1197   1702   1069    121    269    275       N  
ATOM    771  N  BTHR A  48      -6.395  -3.838   2.875  0.65  7.68           N  
ANISOU  771  N  BTHR A  48      943   1259    717   -216   -513   -272       N  
ATOM    772  CA ATHR A  48      -6.699  -5.151   2.323  0.35 12.21           C  
ANISOU  772  CA ATHR A  48     1185   1980   1473    -34   -499    371       C  
ATOM    773  CA BTHR A  48      -6.568  -5.173   2.346  0.65  8.97           C  
ANISOU  773  CA BTHR A  48     1371   1387    649   -394    -33    -73       C  
ATOM    774  C  ATHR A  48      -6.090  -5.246   0.920  0.35  8.86           C  
ANISOU  774  C  ATHR A  48      875   1529    961   -294   -698    326       C  
ATOM    775  C  BTHR A  48      -5.992  -5.239   0.942  0.65  6.65           C  
ANISOU  775  C  BTHR A  48      763   1094    669   -384   -127    -57       C  
ATOM    776  O  ATHR A  48      -6.038  -4.252   0.190  0.35 10.65           O  
ANISOU  776  O  ATHR A  48     1132   1439   1476   -677   -324    218       O  
ATOM    777  O  BTHR A  48      -5.868  -4.243   0.239  0.65  6.22           O  
ANISOU  777  O  BTHR A  48      835    920    610   -256   -374   -105       O  
ATOM    778  CB ATHR A  48      -8.213  -5.447   2.257  0.35 19.97           C  
ANISOU  778  CB ATHR A  48     2147   2840   2599   -222    -93    506       C  
ATOM    779  CB BTHR A  48      -8.028  -5.641   2.351  0.65 13.55           C  
ANISOU  779  CB BTHR A  48     1589   2033   1526   -841    780   -158       C  
ATOM    780  OG1ATHR A  48      -8.430  -6.863   2.256  0.35 11.58           O  
ANISOU  780  OG1ATHR A  48      774   2164   1462   -263   -197    749       O  
ATOM    781  OG1BTHR A  48      -8.786  -4.874   1.429  0.65 12.22           O  
ANISOU  781  OG1BTHR A  48     1096   2155   1392   -523   -153   -188       O  
ATOM    782  CG2ATHR A  48      -8.832  -4.831   1.012  0.35 34.30           C  
ANISOU  782  CG2ATHR A  48     4201   4453   4378   -153   -276    482       C  
ATOM    783  CG2BTHR A  48      -8.621  -5.499   3.717  0.65 19.95           C  
ANISOU  783  CG2BTHR A  48     2858   2701   2020   -747   1332   -208       C  
ATOM    784  H  ATHR A  48      -6.667  -3.183   2.374  0.35 12.53           H  
ATOM    785  H  BTHR A  48      -6.634  -3.203   2.348  0.65  9.22           H  
ATOM    786  HA ATHR A  48      -6.278  -5.833   2.887  0.35 14.65           H  
ATOM    787  HA BTHR A  48      -6.058  -5.797   2.903  0.65 10.76           H  
ATOM    788  HB ATHR A  48      -8.647  -5.059   3.033  0.35 23.96           H  
ATOM    789  HB BTHR A  48      -8.066  -6.577   2.098  0.65 16.26           H  
ATOM    790  HG1ATHR A  48      -8.122  -7.195   2.939  0.35 13.90           H  
ATOM    791  HG1BTHR A  48      -8.760  -4.081   1.635  0.65 14.66           H  
ATOM    792 HG21ATHR A  48      -9.773  -5.022   0.985  0.35 41.16           H  
ATOM    793 HG21BTHR A  48      -9.535  -5.794   3.710  0.65 23.94           H  
ATOM    794 HG22ATHR A  48      -8.708  -3.879   1.020  0.35 41.16           H  
ATOM    795 HG22BTHR A  48      -8.127  -6.030   4.346  0.65 23.94           H  
ATOM    796 HG23ATHR A  48      -8.417  -5.193   0.226  0.35 41.16           H  
ATOM    797 HG23BTHR A  48      -8.593  -4.580   3.993  0.65 23.94           H  
ATOM    798  N   GLN A  49      -5.642  -6.445   0.547  1.00  6.93           N  
ANISOU  798  N   GLN A  49      790   1115    729   -294   -432    119       N  
ATOM    799  CA  GLN A  49      -4.997  -6.678  -0.744  1.00  6.13           C  
ANISOU  799  CA  GLN A  49      688   1013    630   -247   -327     10       C  
ATOM    800  C   GLN A  49      -5.890  -6.203  -1.887  1.00  6.14           C  
ANISOU  800  C   GLN A  49      670    987    675   -275   -352     61       C  
ATOM    801  O   GLN A  49      -7.094  -6.522  -1.927  1.00  6.64           O  
ANISOU  801  O   GLN A  49      658   1071    793   -333   -402     95       O  
ATOM    802  CB  GLN A  49      -4.764  -8.181  -0.903  1.00  6.77           C  
ANISOU  802  CB  GLN A  49      731    961    880   -230   -403    101       C  
ATOM    803  CG  GLN A  49      -4.053  -8.596  -2.151  1.00  6.73           C  
ANISOU  803  CG  GLN A  49      684    930    942   -220   -433     50       C  
ATOM    804  CD  GLN A  49      -2.595  -8.237  -2.183  1.00  6.36           C  
ANISOU  804  CD  GLN A  49      715    922    780   -262   -440      0       C  
ATOM    805  OE1 GLN A  49      -1.943  -8.163  -1.144  1.00  6.43           O  
ANISOU  805  OE1 GLN A  49      723    891    828   -241   -434     84       O  
ATOM    806  NE2 GLN A  49      -2.061  -8.029  -3.361  1.00  7.07           N  
ANISOU  806  NE2 GLN A  49      798   1071    816   -289   -400    -11       N  
ATOM    807  H  AGLN A  49      -5.703  -7.152   1.034  0.35  8.32           H  
ATOM    808  H  BGLN A  49      -5.767  -7.160   1.009  0.65  8.32           H  
ATOM    809  HA  GLN A  49      -4.138  -6.210  -0.786  1.00  7.36           H  
ATOM    810  HB2 GLN A  49      -4.235  -8.490  -0.151  1.00  8.12           H  
ATOM    811  HB3 GLN A  49      -5.625  -8.627  -0.897  1.00  8.12           H  
ATOM    812  HG2 GLN A  49      -4.121  -9.559  -2.242  1.00  8.07           H  
ATOM    813  HG3 GLN A  49      -4.479  -8.165  -2.909  1.00  8.07           H  
ATOM    814 HE21 GLN A  49      -1.229  -7.821  -3.425  1.00  8.48           H  
ATOM    815 HE22 GLN A  49      -2.542  -8.101  -4.070  1.00  8.48           H  
ATOM    816  N   GLY A  50      -5.305  -5.510  -2.850  1.00  6.35           N  
ANISOU  816  N   GLY A  50      758    983    672   -363   -424    122       N  
ATOM    817  CA  GLY A  50      -6.058  -5.060  -4.003  1.00  6.88           C  
ANISOU  817  CA  GLY A  50      879   1049    686   -416   -533    164       C  
ATOM    818  C   GLY A  50      -5.165  -4.347  -4.979  1.00  7.87           C  
ANISOU  818  C   GLY A  50      973   1251    765   -562   -602    105       C  
ATOM    819  O   GLY A  50      -3.975  -4.599  -5.025  1.00  8.57           O  
ANISOU  819  O   GLY A  50     1108   1386    761   -616   -489    259       O  
ATOM    820  H   GLY A  50      -4.474  -5.288  -2.859  1.00  7.62           H  
ATOM    821  HA2 GLY A  50      -6.464  -5.820  -4.448  1.00  8.26           H  
ATOM    822  HA3 GLY A  50      -6.760  -4.452  -3.721  1.00  8.26           H  
ATOM    823  N   GLY A  51      -5.772  -3.463  -5.766  1.00  8.74           N  
ANISOU  823  N   GLY A  51     1184   1238    897   -661   -679    296       N  
ATOM    824  CA  GLY A  51      -4.984  -2.664  -6.671  1.00  9.02           C  
ANISOU  824  CA  GLY A  51     1480   1246    703   -655   -454    199       C  
ATOM    825  C   GLY A  51      -4.151  -1.609  -5.980  1.00  7.96           C  
ANISOU  825  C   GLY A  51     1269   1112    643   -485   -330    109       C  
ATOM    826  O   GLY A  51      -3.076  -1.210  -6.429  1.00  9.70           O  
ANISOU  826  O   GLY A  51     1368   1346    974   -601   -115   -130       O  
ATOM    827  H   GLY A  51      -6.618  -3.314  -5.790  1.00 10.48           H  
ATOM    828  HA2 GLY A  51      -4.387  -3.242  -7.171  1.00 10.83           H  
ATOM    829  HA3 GLY A  51      -5.574  -2.220  -7.300  1.00 10.83           H  
ATOM    830  N   LYS A  52      -4.639  -1.131  -4.848  1.00  6.77           N  
ANISOU  830  N   LYS A  52      641    947    986   -144   -419    159       N  
ATOM    831  CA  LYS A  52      -4.018  -0.038  -4.098  1.00  6.60           C  
ANISOU  831  CA  LYS A  52      751    862    897    -31   -357    126       C  
ATOM    832  C   LYS A  52      -2.926  -0.523  -3.142  1.00  5.57           C  
ANISOU  832  C   LYS A  52      585    805    726   -172   -306    -12       C  
ATOM    833  O   LYS A  52      -1.872   0.084  -3.064  1.00  6.72           O  
ANISOU  833  O   LYS A  52      712    902    940   -216   -328    128       O  
ATOM    834  CB  LYS A  52      -5.127   0.688  -3.298  1.00  7.93           C  
ANISOU  834  CB  LYS A  52      811   1044   1158     78   -379      4       C  
ATOM    835  CG  LYS A  52      -4.633   1.894  -2.543  1.00  8.39           C  
ANISOU  835  CG  LYS A  52      751   1161   1275    163   -105    -20       C  
ATOM    836  CD  LYS A  52      -4.092   2.973  -3.462  1.00  8.45           C  
ANISOU  836  CD  LYS A  52      950   1188   1071      5   -254    -75       C  
ATOM    837  CE  LYS A  52      -3.690   4.185  -2.680  1.00  8.67           C  
ANISOU  837  CE  LYS A  52      839   1160   1293    128   -127    -63       C  
ATOM    838  NZ  LYS A  52      -3.152   5.234  -3.561  1.00  8.50           N  
ANISOU  838  NZ  LYS A  52      834   1115   1282    132   -140    -72       N  
ATOM    839  H   LYS A  52      -5.354  -1.432  -4.477  1.00  8.13           H  
ATOM    840  HA  LYS A  52      -3.619   0.602  -4.724  1.00  7.92           H  
ATOM    841  HB2 LYS A  52      -5.815   0.984  -3.915  1.00  9.52           H  
ATOM    842  HB3 LYS A  52      -5.506   0.068  -2.655  1.00  9.52           H  
ATOM    843  HG2 LYS A  52      -5.367   2.272  -2.034  1.00 10.07           H  
ATOM    844  HG3 LYS A  52      -3.919   1.622  -1.945  1.00 10.07           H  
ATOM    845  HD2 LYS A  52      -3.310   2.638  -3.929  1.00 10.14           H  
ATOM    846  HD3 LYS A  52      -4.779   3.232  -4.096  1.00 10.14           H  
ATOM    847  HE2 LYS A  52      -4.466   4.542  -2.220  1.00 10.40           H  
ATOM    848  HE3 LYS A  52      -3.002   3.941  -2.041  1.00 10.40           H  
ATOM    849  HZ1 LYS A  52      -2.919   5.945  -3.080  1.00 10.20           H  
ATOM    850  HZ2 LYS A  52      -2.436   4.929  -3.994  1.00 10.20           H  
ATOM    851  HZ3 LYS A  52      -3.768   5.476  -4.157  1.00 10.20           H  
ATOM    852  N   TYR A  53      -3.225  -1.590  -2.416  1.00  5.58           N  
ANISOU  852  N   TYR A  53      490    776    854   -102   -289    -38       N  
ATOM    853  CA  TYR A  53      -2.344  -2.117  -1.400  1.00  5.42           C  
ANISOU  853  CA  TYR A  53      574    755    729   -103   -375     -7       C  
ATOM    854  C   TYR A  53      -1.908  -3.513  -1.764  1.00  5.08           C  
ANISOU  854  C   TYR A  53      497    701    733    -62   -372     46       C  
ATOM    855  O   TYR A  53      -2.749  -4.397  -2.002  1.00  6.21           O  
ANISOU  855  O   TYR A  53      620    788    949   -197   -454     37       O  
ATOM    856  CB  TYR A  53      -3.051  -2.173  -0.031  1.00  6.39           C  
ANISOU  856  CB  TYR A  53      706    985    737   -115   -300    -48       C  
ATOM    857  CG  TYR A  53      -3.591  -0.847   0.421  1.00  6.65           C  
ANISOU  857  CG  TYR A  53      578   1094    856    -80   -254   -127       C  
ATOM    858  CD1 TYR A  53      -4.957  -0.654   0.564  1.00  8.77           C  
ANISOU  858  CD1 TYR A  53      711   1349   1272   -123   -161   -445       C  
ATOM    859  CD2 TYR A  53      -2.743   0.221   0.724  1.00  6.88           C  
ANISOU  859  CD2 TYR A  53      619   1102    893    -73   -260    -78       C  
ATOM    860  CE1 TYR A  53      -5.463   0.551   0.985  1.00 10.80           C  
ANISOU  860  CE1 TYR A  53      659   1492   1953    -49    -71   -775       C  
ATOM    861  CE2 TYR A  53      -3.248   1.423   1.151  1.00  8.31           C  
ANISOU  861  CE2 TYR A  53      798   1291   1070   -106   -121   -332       C  
ATOM    862  CZ  TYR A  53      -4.621   1.584   1.292  1.00 10.80           C  
ANISOU  862  CZ  TYR A  53      756   1497   1852    -30    -25   -852       C  
ATOM    863  OH  TYR A  53      -5.155   2.780   1.698  1.00 14.26           O  
ANISOU  863  OH  TYR A  53      973   1747   2698   -173    259  -1046       O  
ATOM    864  H   TYR A  53      -3.956  -2.035  -2.499  1.00  6.70           H  
ATOM    865  HA  TYR A  53      -1.550  -1.548  -1.323  1.00  6.50           H  
ATOM    866  HB2 TYR A  53      -3.795  -2.793  -0.088  1.00  7.67           H  
ATOM    867  HB3 TYR A  53      -2.418  -2.480   0.636  1.00  7.67           H  
ATOM    868  HD1 TYR A  53      -5.540  -1.352   0.370  1.00 10.53           H  
ATOM    869  HD2 TYR A  53      -1.823   0.114   0.642  1.00  8.26           H  
ATOM    870  HE1 TYR A  53      -6.382   0.661   1.076  1.00 12.96           H  
ATOM    871  HE2 TYR A  53      -2.673   2.127   1.349  1.00  9.97           H  
ATOM    872  HH  TYR A  53      -4.931   3.377   1.182  1.00 17.11           H  
ATOM    873  N   LYS A  54      -0.591  -3.750  -1.778  1.00  5.11           N  
ANISOU  873  N   LYS A  54      541    677    724   -131   -385     44       N  
ATOM    874  CA  LYS A  54      -0.045  -5.046  -2.068  1.00  5.25           C  
ANISOU  874  CA  LYS A  54      630    692    672   -117   -388     39       C  
ATOM    875  C   LYS A  54       0.718  -5.515  -0.847  1.00  4.93           C  
ANISOU  875  C   LYS A  54      597    622    655    -65   -369    -25       C  
ATOM    876  O   LYS A  54       1.706  -4.890  -0.440  1.00  6.12           O  
ANISOU  876  O   LYS A  54      659    732    933   -194   -552     15       O  
ATOM    877  CB  LYS A  54       0.838  -5.016  -3.324  1.00  7.77           C  
ANISOU  877  CB  LYS A  54     1132   1089    729     75   -185    129       C  
ATOM    878  CG  LYS A  54      -0.016  -4.576  -4.549  1.00 16.27           C  
ANISOU  878  CG  LYS A  54     2982   1888   1313    851    619    628       C  
ATOM    879  CD  LYS A  54       0.392  -4.992  -5.901  1.00 12.65           C  
ANISOU  879  CD  LYS A  54     1604   1952   1253     82   -487     60       C  
ATOM    880  CE  LYS A  54      -0.605  -4.422  -6.876  1.00 16.75           C  
ANISOU  880  CE  LYS A  54     2128   2327   1909     70  -1438     20       C  
ATOM    881  NZ  LYS A  54      -1.904  -5.176  -7.076  1.00 13.94           N  
ANISOU  881  NZ  LYS A  54     1843   2259   1195    242  -1168   -122       N  
ATOM    882  H   LYS A  54       0.006  -3.152  -1.618  1.00  6.13           H  
ATOM    883  HA  LYS A  54      -0.779  -5.675  -2.228  1.00  6.30           H  
ATOM    884  HB2 LYS A  54       1.558  -4.377  -3.202  1.00  9.32           H  
ATOM    885  HB3 LYS A  54       1.193  -5.903  -3.495  1.00  9.32           H  
ATOM    886  HG2 LYS A  54      -0.915  -4.913  -4.416  1.00 19.53           H  
ATOM    887  HG3 LYS A  54      -0.043  -3.606  -4.554  1.00 19.53           H  
ATOM    888  HD2 LYS A  54       1.272  -4.637  -6.106  1.00 15.19           H  
ATOM    889  HD3 LYS A  54       0.382  -5.959  -5.967  1.00 15.19           H  
ATOM    890  HE2 LYS A  54      -0.840  -3.530  -6.577  1.00 20.10           H  
ATOM    891  HE3 LYS A  54      -0.176  -4.364  -7.744  1.00 20.10           H  
ATOM    892  HZ1 LYS A  54      -2.413  -4.752  -7.670  1.00 16.73           H  
ATOM    893  HZ2 LYS A  54      -1.735  -5.998  -7.374  1.00 16.73           H  
ATOM    894  HZ3 LYS A  54      -2.344  -5.233  -6.305  1.00 16.73           H  
ATOM    895  N   LEU A  55       0.278  -6.622  -0.288  1.00  5.17           N  
ANISOU  895  N   LEU A  55      711    603    650   -132   -427     29       N  
ATOM    896  CA  LEU A  55       0.811  -7.166   0.960  1.00  5.85           C  
ANISOU  896  CA  LEU A  55      753    767    703     -2   -455     38       C  
ATOM    897  C   LEU A  55       1.535  -8.446   0.651  1.00  5.56           C  
ANISOU  897  C   LEU A  55      737    721    654   -143   -378    -15       C  
ATOM    898  O   LEU A  55       1.061  -9.236  -0.152  1.00  6.75           O  
ANISOU  898  O   LEU A  55      886    746    932    -82   -557   -140       O  
ATOM    899  CB  LEU A  55      -0.353  -7.445   1.921  1.00  7.10           C  
ANISOU  899  CB  LEU A  55     1013   1062    624    128   -148    101       C  
ATOM    900  CG  LEU A  55      -1.111  -6.233   2.429  1.00  8.45           C  
ANISOU  900  CG  LEU A  55     1072   1300    838    198   -342    -26       C  
ATOM    901  CD1 LEU A  55      -2.603  -6.636   2.662  1.00 11.82           C  
ANISOU  901  CD1 LEU A  55     1181   1674   1636    231   -451   -408       C  
ATOM    902  CD2 LEU A  55      -0.546  -5.689   3.671  1.00  9.97           C  
ANISOU  902  CD2 LEU A  55     1330   1417   1043   -131   -431    -93       C  
ATOM    903  H   LEU A  55      -0.355  -7.100  -0.620  1.00  6.20           H  
ATOM    904  HA  LEU A  55       1.432  -6.531   1.374  1.00  7.02           H  
ATOM    905  HB2 LEU A  55      -0.992  -8.015   1.466  1.00  8.52           H  
ATOM    906  HB3 LEU A  55      -0.002  -7.911   2.696  1.00  8.52           H  
ATOM    907  HG  LEU A  55      -1.088  -5.537   1.755  1.00 10.14           H  
ATOM    908 HD11 LEU A  55      -3.086  -5.871   2.984  1.00 14.18           H  
ATOM    909 HD12 LEU A  55      -2.979  -6.935   1.831  1.00 14.18           H  
ATOM    910 HD13 LEU A  55      -2.638  -7.342   3.311  1.00 14.18           H  
ATOM    911 HD21 LEU A  55      -1.065  -4.928   3.943  1.00 11.97           H  
ATOM    912 HD22 LEU A  55      -0.577  -6.366   4.351  1.00 11.97           H  
ATOM    913 HD23 LEU A  55       0.363  -5.425   3.511  1.00 11.97           H  
ATOM    914  N   SER A  56       2.655  -8.677   1.326  1.00  4.95           N  
ANISOU  914  N   SER A  56      646    649    587   -126   -274    -34       N  
ATOM    915  CA  SER A  56       3.385  -9.927   1.222  1.00  5.17           C  
ANISOU  915  CA  SER A  56      756    627    581   -133   -266    -39       C  
ATOM    916  C   SER A  56       4.032 -10.256   2.545  1.00  5.46           C  
ANISOU  916  C   SER A  56      748    551    775    -34   -314    -91       C  
ATOM    917  O   SER A  56       4.354  -9.369   3.322  1.00  6.16           O  
ANISOU  917  O   SER A  56      922    552    866      0   -481   -160       O  
ATOM    918  CB  SER A  56       4.498  -9.844   0.157  1.00  6.17           C  
ANISOU  918  CB  SER A  56      727    822    794   -105   -148   -203       C  
ATOM    919  OG  SER A  56       3.979  -9.527  -1.113  1.00  6.93           O  
ANISOU  919  OG  SER A  56     1013    859    759   -114    -96    -91       O  
ATOM    920  H   SER A  56       3.017  -8.110   1.862  1.00  5.95           H  
ATOM    921  HA  SER A  56       2.771 -10.652   0.982  1.00  6.20           H  
ATOM    922  HB2 SER A  56       5.130  -9.156   0.417  1.00  7.40           H  
ATOM    923  HB3 SER A  56       4.947 -10.702   0.105  1.00  7.40           H  
ATOM    924  HG  SER A  56       3.165  -9.439  -1.069  1.00  8.31           H  
ATOM    925  N   GLU A  57       4.246 -11.541   2.778  1.00  6.72           N  
ANISOU  925  N   GLU A  57     1093    678    782    179   -475   -208       N  
ATOM    926  CA  GLU A  57       4.901 -12.032   3.991  1.00  8.34           C  
ANISOU  926  CA  GLU A  57     1530    889    751    299   -535   -194       C  
ATOM    927  C   GLU A  57       5.867 -13.128   3.591  1.00  9.31           C  
ANISOU  927  C   GLU A  57     1790    807    942    367   -691   -174       C  
ATOM    928  O   GLU A  57       5.473 -14.032   2.863  1.00 10.33           O  
ANISOU  928  O   GLU A  57     1922    858   1145    257   -673   -365       O  
ATOM    929  CB  GLU A  57       3.888 -12.598   5.003  1.00  9.19           C  
ANISOU  929  CB  GLU A  57     1550   1086    853    342   -491    -47       C  
ATOM    930  CG  GLU A  57       2.736 -11.665   5.306  1.00  8.87           C  
ANISOU  930  CG  GLU A  57     1464   1067    838     15   -396     53       C  
ATOM    931  CD  GLU A  57       1.752 -12.169   6.358  1.00  9.75           C  
ANISOU  931  CD  GLU A  57     1872    971    860    -36   -463    236       C  
ATOM    932  OE1 GLU A  57       1.864 -13.315   6.831  1.00 11.10           O  
ANISOU  932  OE1 GLU A  57     1999   1039   1179    164   -242    164       O  
ATOM    933  OE2 GLU A  57       0.837 -11.399   6.673  1.00  9.90           O  
ANISOU  933  OE2 GLU A  57     1833   1052    876    104   -300     36       O  
ATOM    934  H   GLU A  57       4.017 -12.168   2.236  1.00  8.06           H  
ATOM    935  HA  GLU A  57       5.403 -11.306   4.416  1.00 10.01           H  
ATOM    936  HB2 GLU A  57       3.517 -13.420   4.647  1.00 11.02           H  
ATOM    937  HB3 GLU A  57       4.349 -12.779   5.837  1.00 11.02           H  
ATOM    938  HG2 GLU A  57       3.097 -10.823   5.623  1.00 10.64           H  
ATOM    939  HG3 GLU A  57       2.237 -11.517   4.487  1.00 10.64           H  
ATOM    940  N   ASP A  58       7.125 -13.057   4.033  1.00  9.20           N  
ANISOU  940  N   ASP A  58     1573    970    953    609   -662   -269       N  
ATOM    941  CA  ASP A  58       8.100 -14.108   3.707  1.00 10.39           C  
ANISOU  941  CA  ASP A  58     1746   1275    926    550   -380   -235       C  
ATOM    942  C   ASP A  58       9.202 -14.061   4.741  1.00 12.95           C  
ANISOU  942  C   ASP A  58     2165   1830    925    989   -700   -426       C  
ATOM    943  O   ASP A  58       9.792 -12.997   4.967  1.00 13.35           O  
ANISOU  943  O   ASP A  58     1434   2208   1431    508   -430   -700       O  
ATOM    944  CB  ASP A  58       8.709 -13.934   2.311  1.00 11.09           C  
ANISOU  944  CB  ASP A  58     1872   1357    984    222   -166   -163       C  
ATOM    945  CG  ASP A  58       9.517 -15.141   1.872  1.00 10.60           C  
ANISOU  945  CG  ASP A  58     1655   1276   1097    210    -94    -12       C  
ATOM    946  OD1 ASP A  58       9.412 -16.227   2.500  1.00 13.08           O  
ANISOU  946  OD1 ASP A  58     2164   1270   1538    396    326     59       O  
ATOM    947  OD2 ASP A  58      10.231 -15.022   0.852  1.00 10.80           O  
ANISOU  947  OD2 ASP A  58     1529   1379   1195    189   -209    -45       O  
ATOM    948  H   ASP A  58       7.438 -12.420   4.518  1.00 11.04           H  
ATOM    949  HA  ASP A  58       7.665 -14.985   3.752  1.00 12.47           H  
ATOM    950  HB2 ASP A  58       7.994 -13.802   1.668  1.00 13.31           H  
ATOM    951  HB3 ASP A  58       9.298 -13.164   2.316  1.00 13.31           H  
ATOM    952  N   LYS A  59       9.469 -15.217   5.357  1.00 20.49           N  
ANISOU  952  N   LYS A  59     3868   2369   1549   1788  -1206   -702       N  
ATOM    953  CA  LYS A  59      10.623 -15.425   6.228  1.00 23.52           C  
ANISOU  953  CA  LYS A  59     3877   2806   2254   1723  -1723   -750       C  
ATOM    954  C   LYS A  59      10.866 -14.291   7.187  1.00 21.72           C  
ANISOU  954  C   LYS A  59     3531   2695   2025   1301  -1658   -633       C  
ATOM    955  O   LYS A  59      11.976 -13.759   7.269  1.00 27.59           O  
ANISOU  955  O   LYS A  59     3768   3081   3634   1399   -855   -935       O  
ATOM    956  CB  LYS A  59      11.884 -15.658   5.386  1.00 26.41           C  
ANISOU  956  CB  LYS A  59     3550   2913   3569   1509  -1417   -532       C  
ATOM    957  H   LYS A  59       8.976 -15.917   5.281  1.00 24.59           H  
ATOM    958  HA  LYS A  59      10.469 -16.233   6.760  1.00 28.23           H  
ATOM    959  N   GLY A  60       9.838 -13.936   7.935  1.00 20.88           N  
ANISOU  959  N   GLY A  60     3980   2376   1579   1143   -804   -433       N  
ATOM    960  CA  GLY A  60      10.024 -12.985   9.004  1.00 20.47           C  
ANISOU  960  CA  GLY A  60     3991   2176   1612    779   -739   -477       C  
ATOM    961  C   GLY A  60       9.929 -11.537   8.587  1.00 12.61           C  
ANISOU  961  C   GLY A  60     2527   1240   1024    403   -519   -227       C  
ATOM    962  O   GLY A  60      10.134 -10.656   9.411  1.00 14.12           O  
ANISOU  962  O   GLY A  60     3370   1036    957     38   -541   -230       O  
ATOM    963  H   GLY A  60       9.034 -14.227   7.845  1.00 25.06           H  
ATOM    964  HA2 GLY A  60       9.354 -13.145   9.687  1.00 24.57           H  
ATOM    965  HA3 GLY A  60      10.898 -13.125   9.401  1.00 24.57           H  
ATOM    966  N   GLY A  61       9.612 -11.312   7.321  1.00 10.15           N  
ANISOU  966  N   GLY A  61     1423   1219   1217    513   -685   -267       N  
ATOM    967  CA  GLY A  61       9.365  -9.994   6.785  1.00  8.79           C  
ANISOU  967  CA  GLY A  61      932   1220   1187    373   -501   -238       C  
ATOM    968  C   GLY A  61       7.889  -9.869   6.425  1.00  7.25           C  
ANISOU  968  C   GLY A  61      852    971    931    202   -546   -172       C  
ATOM    969  O   GLY A  61       7.269 -10.800   5.900  1.00  9.19           O  
ANISOU  969  O   GLY A  61     1145    893   1451    231   -663   -459       O  
ATOM    970  H   GLY A  61       9.532 -11.935   6.734  1.00 12.18           H  
ATOM    971  HA2 GLY A  61       9.590  -9.318   7.443  1.00 10.55           H  
ATOM    972  HA3 GLY A  61       9.899  -9.852   5.988  1.00 10.55           H  
ATOM    973  N   PHE A  62       7.355  -8.701   6.708  1.00  5.72           N  
ANISOU  973  N   PHE A  62      763    734    675     67   -452   -102       N  
ATOM    974  CA  PHE A  62       5.958  -8.340   6.469  1.00  5.46           C  
ANISOU  974  CA  PHE A  62      713    695    666     32   -444    -25       C  
ATOM    975  C   PHE A  62       5.992  -7.034   5.699  1.00  5.17           C  
ANISOU  975  C   PHE A  62      620    633    712     -8   -380    -32       C  
ATOM    976  O   PHE A  62       6.436  -6.004   6.221  1.00  6.23           O  
ANISOU  976  O   PHE A  62      954    657    758   -216   -524    -19       O  
ATOM    977  CB  PHE A  62       5.214  -8.206   7.797  1.00  6.01           C  
ANISOU  977  CB  PHE A  62      776    744    765    -57   -275    -91       C  
ATOM    978  CG  PHE A  62       5.311  -9.451   8.606  1.00  6.69           C  
ANISOU  978  CG  PHE A  62     1045    759    736   -116   -335     -9       C  
ATOM    979  CD1 PHE A  62       4.410 -10.477   8.400  1.00  7.02           C  
ANISOU  979  CD1 PHE A  62      957    832    878   -134   -258    -85       C  
ATOM    980  CD2 PHE A  62       6.374  -9.662   9.481  1.00  7.51           C  
ANISOU  980  CD2 PHE A  62     1183    993    678    -13   -423    159       C  
ATOM    981  CE1 PHE A  62       4.539 -11.683   9.076  1.00  8.43           C  
ANISOU  981  CE1 PHE A  62     1081    939   1182   -149   -281     89       C  
ATOM    982  CE2 PHE A  62       6.507 -10.865  10.145  1.00  9.25           C  
ANISOU  982  CE2 PHE A  62     1505   1119    889    -47   -535    237       C  
ATOM    983  CZ  PHE A  62       5.589 -11.875   9.933  1.00  8.69           C  
ANISOU  983  CZ  PHE A  62     1338   1067    898    -71   -358    199       C  
ATOM    984  H   PHE A  62       7.804  -8.058   7.061  1.00  6.86           H  
ATOM    985  HA  PHE A  62       5.520  -9.025   5.922  1.00  6.55           H  
ATOM    986  HB2 PHE A  62       5.603  -7.480   8.310  1.00  7.22           H  
ATOM    987  HB3 PHE A  62       4.277  -8.029   7.623  1.00  7.22           H  
ATOM    988  HD1 PHE A  62       3.710 -10.360   7.798  1.00  8.42           H  
ATOM    989  HD2 PHE A  62       7.008  -8.993   9.605  1.00  9.01           H  
ATOM    990  HE1 PHE A  62       3.916 -12.361   8.942  1.00 10.11           H  
ATOM    991  HE2 PHE A  62       7.209 -10.991  10.742  1.00 11.09           H  
ATOM    992  HZ  PHE A  62       5.659 -12.672  10.408  1.00 10.43           H  
ATOM    993  N   PHE A  63       5.509  -7.077   4.452  1.00  5.06           N  
ANISOU  993  N   PHE A  63      630    587    706    -73   -447    -36       N  
ATOM    994  CA  PHE A  63       5.666  -6.009   3.509  1.00  5.28           C  
ANISOU  994  CA  PHE A  63      685    584    738    -54   -395     -5       C  
ATOM    995  C   PHE A  63       4.312  -5.421   3.124  1.00  4.60           C  
ANISOU  995  C   PHE A  63      634    584    529    -86   -352      3       C  
ATOM    996  O   PHE A  63       3.329  -6.171   2.917  1.00  5.33           O  
ANISOU  996  O   PHE A  63      638    578    810   -104   -495     -2       O  
ATOM    997  CB  PHE A  63       6.354  -6.516   2.224  1.00  5.84           C  
ANISOU  997  CB  PHE A  63      670    769    781    -76   -359    -19       C  
ATOM    998  CG  PHE A  63       7.713  -7.129   2.434  1.00  6.55           C  
ANISOU  998  CG  PHE A  63      693    869    925     92   -408   -224       C  
ATOM    999  CD1 PHE A  63       8.851  -6.356   2.254  1.00  8.46           C  
ANISOU  999  CD1 PHE A  63      773   1151   1290     20   -334   -362       C  
ATOM   1000  CD2 PHE A  63       7.856  -8.444   2.807  1.00  7.66           C  
ANISOU 1000  CD2 PHE A  63      900    985   1025    176   -381   -138       C  
ATOM   1001  CE1 PHE A  63      10.109  -6.889   2.461  1.00 10.79           C  
ANISOU 1001  CE1 PHE A  63      822   1382   1895    120   -400   -582       C  
ATOM   1002  CE2 PHE A  63       9.115  -8.984   2.998  1.00  9.31           C  
ANISOU 1002  CE2 PHE A  63      975   1188   1374    271   -393   -272       C  
ATOM   1003  CZ  PHE A  63      10.244  -8.200   2.834  1.00 10.12           C  
ANISOU 1003  CZ  PHE A  63      954   1370   1522    297   -682   -419       C  
ATOM   1004  H   PHE A  63       5.073  -7.747   4.135  1.00  6.07           H  
ATOM   1005  HA  PHE A  63       6.217  -5.300   3.901  1.00  6.34           H  
ATOM   1006  HB2 PHE A  63       5.788  -7.190   1.816  1.00  7.01           H  
ATOM   1007  HB3 PHE A  63       6.460  -5.768   1.615  1.00  7.01           H  
ATOM   1008  HD1 PHE A  63       8.765  -5.463   2.010  1.00 10.15           H  
ATOM   1009  HD2 PHE A  63       7.102  -8.975   2.928  1.00  9.19           H  
ATOM   1010  HE1 PHE A  63      10.865  -6.360   2.337  1.00 12.95           H  
ATOM   1011  HE2 PHE A  63       9.203  -9.874   3.254  1.00 11.17           H  
ATOM   1012  HZ  PHE A  63      11.089  -8.566   2.961  1.00 12.14           H  
ATOM   1013  N   LEU A  64       4.277  -4.118   2.964  1.00  4.51           N  
ANISOU 1013  N   LEU A  64      521    601    593    -82   -300    -27       N  
ATOM   1014  CA  LEU A  64       3.151  -3.388   2.389  1.00  4.39           C  
ANISOU 1014  CA  LEU A  64      546    615    507    -76   -312     43       C  
ATOM   1015  C   LEU A  64       3.676  -2.432   1.342  1.00  4.44           C  
ANISOU 1015  C   LEU A  64      504    544    639    -36   -313     14       C  
ATOM   1016  O   LEU A  64       4.612  -1.679   1.608  1.00  5.42           O  
ANISOU 1016  O   LEU A  64      632    651    778   -193   -419     62       O  
ATOM   1017  CB  LEU A  64       2.400  -2.595   3.457  1.00  5.33           C  
ANISOU 1017  CB  LEU A  64      682    792    550     10   -271     -3       C  
ATOM   1018  CG  LEU A  64       1.351  -1.600   2.921  1.00  6.31           C  
ANISOU 1018  CG  LEU A  64      737    965    697     78   -259    -44       C  
ATOM   1019  CD1 LEU A  64       0.215  -2.308   2.233  1.00  6.43           C  
ANISOU 1019  CD1 LEU A  64      654   1047    742     75   -257      6       C  
ATOM   1020  CD2 LEU A  64       0.837  -0.746   4.077  1.00  7.71           C  
ANISOU 1020  CD2 LEU A  64      988   1158    784    305   -181    -91       C  
ATOM   1021  H   LEU A  64       4.925  -3.601   3.193  1.00  5.42           H  
ATOM   1022  HA  LEU A  64       2.530  -4.015   1.963  1.00  5.27           H  
ATOM   1023  HB2 LEU A  64       1.939  -3.221   4.038  1.00  6.39           H  
ATOM   1024  HB3 LEU A  64       3.045  -2.088   3.975  1.00  6.39           H  
ATOM   1025  HG  LEU A  64       1.773  -1.011   2.276  1.00  7.57           H  
ATOM   1026 HD11 LEU A  64      -0.413  -1.655   1.915  1.00  7.71           H  
ATOM   1027 HD12 LEU A  64       0.563  -2.814   1.495  1.00  7.71           H  
ATOM   1028 HD13 LEU A  64      -0.212  -2.895   2.861  1.00  7.71           H  
ATOM   1029 HD21 LEU A  64       0.184  -0.127   3.741  1.00  9.25           H  
ATOM   1030 HD22 LEU A  64       0.437  -1.320   4.734  1.00  9.25           H  
ATOM   1031 HD23 LEU A  64       1.574  -0.268   4.463  1.00  9.25           H  
ATOM   1032  N   GLU A  65       3.056  -2.442   0.167  1.00  4.37           N  
ANISOU 1032  N   GLU A  65      523    577    563   -154   -303      6       N  
ATOM   1033  CA  GLU A  65       3.265  -1.409  -0.830  1.00  4.41           C  
ANISOU 1033  CA  GLU A  65      552    531    593   -126   -251     -3       C  
ATOM   1034  C   GLU A  65       1.961  -0.664  -1.047  1.00  4.21           C  
ANISOU 1034  C   GLU A  65      507    570    525    -71   -235     56       C  
ATOM   1035  O   GLU A  65       0.904  -1.275  -1.178  1.00  5.30           O  
ANISOU 1035  O   GLU A  65      519    618    878   -116   -391     68       O  
ATOM   1036  CB  GLU A  65       3.721  -1.997  -2.162  1.00  4.83           C  
ANISOU 1036  CB  GLU A  65      614    619    600    -98   -204      4       C  
ATOM   1037  CG  GLU A  65       4.971  -2.818  -2.063  1.00  5.41           C  
ANISOU 1037  CG  GLU A  65      675    707    672      3   -182    -24       C  
ATOM   1038  CD  GLU A  65       5.497  -3.230  -3.430  1.00  5.90           C  
ANISOU 1038  CD  GLU A  65      721    746    773     92   -122     74       C  
ATOM   1039  OE1 GLU A  65       4.695  -3.253  -4.395  1.00  7.25           O  
ANISOU 1039  OE1 GLU A  65     1064    991    702    382   -215    -16       O  
ATOM   1040  OE2 GLU A  65       6.700  -3.588  -3.497  1.00  6.70           O  
ANISOU 1040  OE2 GLU A  65      839    799    906     80   -155    -35       O  
ATOM   1041  H   GLU A  65       2.500  -3.051  -0.077  1.00  5.25           H  
ATOM   1042  HA  GLU A  65       3.943  -0.775  -0.515  1.00  5.30           H  
ATOM   1043  HB2 GLU A  65       3.018  -2.567  -2.509  1.00  5.79           H  
ATOM   1044  HB3 GLU A  65       3.892  -1.271  -2.782  1.00  5.79           H  
ATOM   1045  HG2 GLU A  65       5.660  -2.298  -1.619  1.00  6.49           H  
ATOM   1046  HG3 GLU A  65       4.783  -3.624  -1.556  1.00  6.49           H  
ATOM   1047  N  AILE A  66       2.051   0.650  -1.107  0.50  4.98           N  
ANISOU 1047  N  AILE A  66      354    763    774    -33   -503    104       N  
ATOM   1048  N  BILE A  66       2.068   0.655  -1.134  0.50  4.41           N  
ANISOU 1048  N  BILE A  66      662    449    567    -24      0     13       N  
ATOM   1049  CA AILE A  66       0.934   1.517  -1.436  0.50  7.42           C  
ANISOU 1049  CA AILE A  66      953    987    877    202   -170     -2       C  
ATOM   1050  CA BILE A  66       0.943   1.545  -1.405  0.50  3.87           C  
ANISOU 1050  CA BILE A  66      233    499    738   -175   -173    -27       C  
ATOM   1051  C  AILE A  66       1.209   2.034  -2.838  0.50  5.96           C  
ANISOU 1051  C  AILE A  66      538    909    816    260   -190    -33       C  
ATOM   1052  C  BILE A  66       1.184   2.084  -2.816  0.50  4.52           C  
ANISOU 1052  C  BILE A  66      532    434    750   -132   -235    151       C  
ATOM   1053  O  AILE A  66       2.182   2.740  -3.083  0.50  5.66           O  
ANISOU 1053  O  AILE A  66      351   1005    793    -82   -252     78       O  
ATOM   1054  O  BILE A  66       2.124   2.855  -3.041  0.50  5.74           O  
ANISOU 1054  O  BILE A  66     1015    384    783   -193   -123    153       O  
ATOM   1055  CB AILE A  66       0.830   2.707  -0.498  0.50  7.65           C  
ANISOU 1055  CB AILE A  66      617   1044   1244    293   -298   -176       C  
ATOM   1056  CB BILE A  66       0.830   2.696  -0.388  0.50  5.92           C  
ANISOU 1056  CB BILE A  66      669    749    831   -165    -83     30       C  
ATOM   1057  CG1AILE A  66       0.867   2.243   0.961  0.50  7.70           C  
ANISOU 1057  CG1AILE A  66      943   1115    866   -219     51   -340       C  
ATOM   1058  CG1BILE A  66       0.628   2.154   1.038  0.50  6.27           C  
ANISOU 1058  CG1BILE A  66      567   1001    817   -160   -152    110       C  
ATOM   1059  CG2AILE A  66      -0.462   3.481  -0.805  0.50  9.06           C  
ANISOU 1059  CG2AILE A  66      822   1217   1405    564   -334   -393       C  
ATOM   1060  CG2BILE A  66      -0.351   3.590  -0.756  0.50  9.97           C  
ANISOU 1060  CG2BILE A  66     1501   1188   1101   -248    395     65       C  
ATOM   1061  CD1AILE A  66       0.808   3.391   1.920  0.50 11.83           C  
ANISOU 1061  CD1AILE A  66     2023   1497    976    -55    358   -291       C  
ATOM   1062  CD1BILE A  66       1.815   2.282   1.932  0.50  8.30           C  
ANISOU 1062  CD1BILE A  66      913   1271    968   -426   -361     43       C  
ATOM   1063  H  AILE A  66       2.780   1.082  -0.956  0.50  5.97           H  
ATOM   1064  H  BILE A  66       2.812   1.075  -1.035  0.50  5.30           H  
ATOM   1065  HA AILE A  66       0.092   1.015  -1.428  0.50  8.90           H  
ATOM   1066  HA BILE A  66       0.107   1.034  -1.400  0.50  4.64           H  
ATOM   1067  HB AILE A  66       1.587   3.293  -0.656  0.50  9.17           H  
ATOM   1068  HB BILE A  66       1.645   3.222  -0.414  0.50  7.10           H  
ATOM   1069 HG12AILE A  66       0.105   1.668   1.131  0.50  9.23           H  
ATOM   1070 HG12BILE A  66      -0.104   2.638   1.452  0.50  7.53           H  
ATOM   1071 HG13AILE A  66       1.692   1.759   1.120  0.50  9.23           H  
ATOM   1072 HG13BILE A  66       0.404   1.212   0.982  0.50  7.53           H  
ATOM   1073 HG21AILE A  66      -0.524   4.232  -0.211  0.50 10.88           H  
ATOM   1074 HG21BILE A  66      -0.413   4.304  -0.116  0.50 11.97           H  
ATOM   1075 HG22AILE A  66      -0.435   3.784  -1.715  0.50 10.88           H  
ATOM   1076 HG22BILE A  66      -0.208   3.949  -1.635  0.50 11.97           H  
ATOM   1077 HG23AILE A  66      -1.213   2.897  -0.676  0.50 10.88           H  
ATOM   1078 HG23BILE A  66      -1.155   3.066  -0.741  0.50 11.97           H  
ATOM   1079 HD11AILE A  66       0.833   3.050   2.817  0.50 14.20           H  
ATOM   1080 HD11BILE A  66       1.597   1.920   2.794  0.50  9.96           H  
ATOM   1081 HD12AILE A  66       1.561   3.966   1.766  0.50 14.20           H  
ATOM   1082 HD12BILE A  66       2.548   1.795   1.548  0.50  9.96           H  
ATOM   1083 HD13AILE A  66      -0.009   3.875   1.777  0.50 14.20           H  
ATOM   1084 HD13BILE A  66       2.045   3.210   2.014  0.50  9.96           H  
ATOM   1085  N   HIS A  67       0.358   1.655  -3.773  1.00  5.54           N  
ANISOU 1085  N   HIS A  67      610    790    706    -21   -206     71       N  
ATOM   1086  CA  HIS A  67       0.535   2.008  -5.171  1.00  5.51           C  
ANISOU 1086  CA  HIS A  67      613    802    680    -19   -182     43       C  
ATOM   1087  C   HIS A  67      -0.164   3.315  -5.512  1.00  5.90           C  
ANISOU 1087  C   HIS A  67      637    715    889     53   -251    -13       C  
ATOM   1088  O   HIS A  67      -1.034   3.792  -4.773  1.00  7.27           O  
ANISOU 1088  O   HIS A  67      873    897    994    234    -59    108       O  
ATOM   1089  CB  HIS A  67       0.047   0.843  -6.031  1.00  6.34           C  
ANISOU 1089  CB  HIS A  67      698    847    864     71   -308    -98       C  
ATOM   1090  CG  HIS A  67       1.010  -0.297  -5.992  1.00  6.16           C  
ANISOU 1090  CG  HIS A  67      718    825    798    -60   -254     67       C  
ATOM   1091  ND1 HIS A  67       1.483  -0.892  -7.128  1.00  8.69           N  
ANISOU 1091  ND1 HIS A  67     1115   1300    887    402    -36     40       N  
ATOM   1092  CD2 HIS A  67       1.626  -0.911  -4.952  1.00  8.70           C  
ANISOU 1092  CD2 HIS A  67     1471   1015    818    428   -417    -41       C  
ATOM   1093  CE1 HIS A  67       2.364  -1.811  -6.788  1.00  8.23           C  
ANISOU 1093  CE1 HIS A  67     1061   1278    789    443    -69    101       C  
ATOM   1094  NE2 HIS A  67       2.485  -1.831  -5.475  1.00  6.89           N  
ANISOU 1094  NE2 HIS A  67      837    961    822    211   -355    -29       N  
ATOM   1095  H  AHIS A  67      -0.344   1.183  -3.622  0.49  6.65           H  
ATOM   1096  H  BHIS A  67      -0.322   1.149  -3.628  0.51  6.65           H  
ATOM   1097  HA  HIS A  67       1.492   2.128  -5.347  1.00  6.61           H  
ATOM   1098  HB2 HIS A  67      -0.807   0.531  -5.694  1.00  7.61           H  
ATOM   1099  HB3 HIS A  67      -0.040   1.137  -6.951  1.00  7.61           H  
ATOM   1100  HD2 HIS A  67       1.521  -0.705  -4.051  1.00 10.44           H  
ATOM   1101  HE1 HIS A  67       2.820  -2.365  -7.380  1.00  9.88           H  
ATOM   1102  HE2 HIS A  67       2.975  -2.375  -5.024  1.00  8.27           H  
ATOM   1103  N   LYS A  68       0.284   3.931  -6.591  1.00  6.10           N  
ANISOU 1103  N   LYS A  68      842    662    816     63   -104     72       N  
ATOM   1104  CA  LYS A  68      -0.278   5.188  -7.097  1.00  6.49           C  
ANISOU 1104  CA  LYS A  68      901    739    826     -9   -240     17       C  
ATOM   1105  C   LYS A  68      -0.548   6.180  -5.979  1.00  6.49           C  
ANISOU 1105  C   LYS A  68      875    721    869     40   -257     73       C  
ATOM   1106  O   LYS A  68      -1.680   6.593  -5.727  1.00  7.10           O  
ANISOU 1106  O   LYS A  68      873    833    992    277   -316    -87       O  
ATOM   1107  CB  LYS A  68      -1.537   4.957  -7.947  1.00  7.53           C  
ANISOU 1107  CB  LYS A  68      978    998    883     68   -439    -21       C  
ATOM   1108  CG  LYS A  68      -1.922   6.149  -8.782  1.00  9.39           C  
ANISOU 1108  CG  LYS A  68     1180   1379   1009    123   -395     47       C  
ATOM   1109  CD  LYS A  68      -3.337   6.072  -9.319  1.00 14.00           C  
ANISOU 1109  CD  LYS A  68     1527   2241   1552    207   -933    166       C  
ATOM   1110  CE  LYS A  68      -3.716   7.304 -10.122  1.00 29.70           C  
ANISOU 1110  CE  LYS A  68     3253   4105   3928    879  -2417    642       C  
ATOM   1111  NZ  LYS A  68      -3.704   8.548  -9.299  1.00 43.79           N  
ANISOU 1111  NZ  LYS A  68     5479   5825   5333   1115  -3263    770       N  
ATOM   1112  H   LYS A  68       0.936   3.636  -7.068  1.00  7.33           H  
ATOM   1113  HA  LYS A  68       0.389   5.599  -7.686  1.00  7.79           H  
ATOM   1114  HB2 LYS A  68      -1.378   4.211  -8.547  1.00  9.03           H  
ATOM   1115  HB3 LYS A  68      -2.280   4.753  -7.358  1.00  9.03           H  
ATOM   1116  HG2 LYS A  68      -1.852   6.950  -8.239  1.00 11.27           H  
ATOM   1117  HG3 LYS A  68      -1.318   6.210  -9.539  1.00 11.27           H  
ATOM   1118  HD2 LYS A  68      -3.416   5.298  -9.898  1.00 16.80           H  
ATOM   1119  HD3 LYS A  68      -3.955   5.996  -8.575  1.00 16.80           H  
ATOM   1120  HE2 LYS A  68      -3.081   7.417 -10.847  1.00 35.64           H  
ATOM   1121  HE3 LYS A  68      -4.611   7.188 -10.479  1.00 35.64           H  
ATOM   1122  HZ1 LYS A  68      -3.930   9.247  -9.801  1.00 52.55           H  
ATOM   1123  HZ2 LYS A  68      -4.284   8.473  -8.628  1.00 52.55           H  
ATOM   1124  HZ3 LYS A  68      -2.891   8.682  -8.964  1.00 52.55           H  
ATOM   1125  N   THR A  69       0.510   6.585  -5.286  1.00  6.43           N  
ANISOU 1125  N   THR A  69      831    713    899     69   -257    -49       N  
ATOM   1126  CA  THR A  69       0.334   7.411  -4.126  1.00  6.91           C  
ANISOU 1126  CA  THR A  69      850    760   1015    101   -290   -109       C  
ATOM   1127  C   THR A  69      -0.294   8.742  -4.472  1.00  7.95           C  
ANISOU 1127  C   THR A  69     1194    809   1016    207   -367    -43       C  
ATOM   1128  O   THR A  69      -0.044   9.333  -5.535  1.00  8.61           O  
ANISOU 1128  O   THR A  69     1319    802   1150    163   -292     14       O  
ATOM   1129  CB  THR A  69       1.667   7.657  -3.414  1.00  7.46           C  
ANISOU 1129  CB  THR A  69     1060    781    995     25   -234    -39       C  
ATOM   1130  OG1 THR A  69       2.585   8.179  -4.372  1.00  7.15           O  
ANISOU 1130  OG1 THR A  69     1050    799    870   -127   -250    -13       O  
ATOM   1131  CG2 THR A  69       2.200   6.395  -2.774  1.00  7.86           C  
ANISOU 1131  CG2 THR A  69     1126    963    895     80   -310     27       C  
ATOM   1132  H   THR A  69       1.327   6.392  -5.473  1.00  7.71           H  
ATOM   1133  HA  THR A  69      -0.261   6.951  -3.498  1.00  8.29           H  
ATOM   1134  HB  THR A  69       1.533   8.315  -2.714  1.00  8.96           H  
ATOM   1135  HG1 THR A  69       3.310   8.321  -4.017  1.00  8.58           H  
ATOM   1136 HG21 THR A  69       3.035   6.577  -2.336  1.00  9.43           H  
ATOM   1137 HG22 THR A  69       1.573   6.065  -2.127  1.00  9.43           H  
ATOM   1138 HG23 THR A  69       2.340   5.721  -3.444  1.00  9.43           H  
ATOM   1139  N   ASP A  70      -1.084   9.227  -3.525  1.00  8.78           N  
ANISOU 1139  N   ASP A  70     1303    954   1078    426   -226   -148       N  
ATOM   1140  CA  ASP A  70      -1.632  10.556  -3.632  1.00 11.62           C  
ANISOU 1140  CA  ASP A  70     1711   1312   1393    704   -428   -237       C  
ATOM   1141  C   ASP A  70      -1.788  11.133  -2.228  1.00 10.84           C  
ANISOU 1141  C   ASP A  70     1819   1053   1247    625   -173   -193       C  
ATOM   1142  O   ASP A  70      -1.472  10.488  -1.224  1.00  8.83           O  
ANISOU 1142  O   ASP A  70     1383    817   1155    405   -339   -211       O  
ATOM   1143  CB  ASP A  70      -2.936  10.577  -4.455  1.00 14.11           C  
ANISOU 1143  CB  ASP A  70     1865   1906   1593    820   -567     77       C  
ATOM   1144  CG  ASP A  70      -4.058   9.787  -3.818  1.00 16.48           C  
ANISOU 1144  CG  ASP A  70     2576   2221   1463    943  -1106   -303       C  
ATOM   1145  OD1 ASP A  70      -4.902   9.219  -4.574  1.00 18.64           O  
ANISOU 1145  OD1 ASP A  70     2564   2404   2115    684  -1131   -552       O  
ATOM   1146  OD2 ASP A  70      -4.090   9.731  -2.570  1.00 15.21           O  
ANISOU 1146  OD2 ASP A  70     1466   2386   1929    473   -590   -457       O  
ATOM   1147  H   ASP A  70      -1.315   8.802  -2.814  1.00 10.53           H  
ATOM   1148  HA  ASP A  70      -0.983  11.118  -4.105  1.00 13.95           H  
ATOM   1149  HB2 ASP A  70      -3.234  11.495  -4.549  1.00 16.94           H  
ATOM   1150  HB3 ASP A  70      -2.762  10.195  -5.330  1.00 16.94           H  
ATOM   1151  N   THR A  71      -2.268  12.364  -2.180  1.00 15.73           N  
ANISOU 1151  N   THR A  71     2865   1716   1395   1186    -62   -221       N  
ATOM   1152  CA  THR A  71      -2.375  13.090  -0.924  1.00 22.78           C  
ANISOU 1152  CA  THR A  71     3882   3054   1720   1388    -65   -542       C  
ATOM   1153  C   THR A  71      -3.143  12.324   0.131  1.00 15.00           C  
ANISOU 1153  C   THR A  71     2511   1970   1217   1423   -391   -484       C  
ATOM   1154  O   THR A  71      -2.833  12.402   1.304  1.00 14.42           O  
ANISOU 1154  O   THR A  71     2101   1660   1716    973   -638   -609       O  
ATOM   1155  CB  THR A  71      -3.140  14.420  -1.135  1.00 47.63           C  
ANISOU 1155  CB  THR A  71     6201   6263   5632   1204    -68   -861       C  
ATOM   1156  OG1 THR A  71      -2.497  15.195  -2.151  1.00 51.63           O  
ANISOU 1156  OG1 THR A  71     6559   6716   6340   1169   -151  -1053       O  
ATOM   1157  CG2 THR A  71      -3.205  15.215   0.159  1.00 69.27           C  
ANISOU 1157  CG2 THR A  71     8806   8860   8653    982   -595   -751       C  
ATOM   1158  N  ASER A  72      -4.170  11.594  -0.296  0.63 14.07           N  
ANISOU 1158  N  ASER A  72     2324   1888   1133   1608   -663   -488       N  
ATOM   1159  N  BSER A  72      -4.146  11.587  -0.297  0.37 17.32           N  
ANISOU 1159  N  BSER A  72     2480   2142   1957   1300    189   -176       N  
ATOM   1160  CA ASER A  72      -5.039  10.892   0.639  0.63 12.93           C  
ANISOU 1160  CA ASER A  72     1510   1926   1477   1141   -604   -547       C  
ATOM   1161  CA BSER A  72      -5.012  10.926   0.646  0.37 15.29           C  
ANISOU 1161  CA BSER A  72     1902   2110   1796   1085    242   -176       C  
ATOM   1162  C  ASER A  72      -4.280   9.788   1.393  0.63 10.98           C  
ANISOU 1162  C  ASER A  72     1427   1451   1295    780   -244   -311       C  
ATOM   1163  C  BSER A  72      -4.357   9.686   1.267  0.37 11.12           C  
ANISOU 1163  C  BSER A  72     1006   1794   1426    673   -748   -250       C  
ATOM   1164  O  ASER A  72      -4.729   9.321   2.448  0.63 10.24           O  
ANISOU 1164  O  ASER A  72     1126   1381   1386    408     55    -66       O  
ATOM   1165  O  BSER A  72      -4.963   9.028   2.106  0.37 11.71           O  
ANISOU 1165  O  BSER A  72      795   1917   1738    501   -797   -668       O  
ATOM   1166  CB ASER A  72      -6.302  10.336  -0.067  0.63 15.23           C  
ANISOU 1166  CB ASER A  72     1407   2380   2001    862   -779   -358       C  
ATOM   1167  CB BSER A  72      -6.321  10.584  -0.051  0.37 14.44           C  
ANISOU 1167  CB BSER A  72     1596   2169   1721   1181     34      4       C  
ATOM   1168  OG ASER A  72      -6.104   9.120  -0.769  0.63 15.15           O  
ANISOU 1168  OG ASER A  72     1399   2619   1738    497   -725     67       O  
ATOM   1169  OG BSER A  72      -6.900  11.778  -0.562  0.37 11.93           O  
ANISOU 1169  OG BSER A  72     1393   2044   1097   1113     20    212       O  
ATOM   1170  H  ASER A  72      -4.384  11.491  -1.123  0.63 16.88           H  
ATOM   1171  H  BSER A  72      -4.344  11.454  -1.123  0.37 20.78           H  
ATOM   1172  HA ASER A  72      -5.347  11.537   1.310  0.63 15.51           H  
ATOM   1173  HA BSER A  72      -5.216  11.549   1.374  0.37 18.34           H  
ATOM   1174  HB2ASER A  72      -6.985  10.189   0.607  0.63 18.28           H  
ATOM   1175  HB2BSER A  72      -6.145   9.973  -0.784  0.37 17.33           H  
ATOM   1176  HB3ASER A  72      -6.614  11.003  -0.698  0.63 18.28           H  
ATOM   1177  HB3BSER A  72      -6.929  10.179   0.587  0.37 17.33           H  
ATOM   1178  HG ASER A  72      -5.323   8.879  -0.698  0.63 18.18           H  
ATOM   1179  HG BSER A  72      -7.607  11.607  -0.941  0.37 14.32           H  
ATOM   1180  N   ASP A  73      -3.121   9.377   0.866  1.00  8.94           N  
ANISOU 1180  N   ASP A  73     1025   1342   1031    613   -387   -208       N  
ATOM   1181  CA  ASP A  73      -2.385   8.270   1.458  1.00  7.98           C  
ANISOU 1181  CA  ASP A  73      983   1024   1026    338   -244   -120       C  
ATOM   1182  C   ASP A  73      -1.573   8.660   2.692  1.00  7.20           C  
ANISOU 1182  C   ASP A  73      930    894    913    173   -199    -71       C  
ATOM   1183  O   ASP A  73      -1.062   7.794   3.379  1.00  7.54           O  
ANISOU 1183  O   ASP A  73      964    772   1129    164   -416     37       O  
ATOM   1184  CB  ASP A  73      -1.494   7.601   0.419  1.00  7.51           C  
ANISOU 1184  CB  ASP A  73      801    993   1059    347   -237   -209       C  
ATOM   1185  CG  ASP A  73      -2.291   6.925  -0.659  1.00  8.00           C  
ANISOU 1185  CG  ASP A  73      968   1069   1005    215   -277   -154       C  
ATOM   1186  OD1 ASP A  73      -3.293   6.257  -0.337  1.00  9.35           O  
ANISOU 1186  OD1 ASP A  73     1133   1381   1037     14   -244   -206       O  
ATOM   1187  OD2 ASP A  73      -1.892   7.067  -1.841  1.00  8.36           O  
ANISOU 1187  OD2 ASP A  73     1200    974   1002    188   -181    -86       O  
ATOM   1188  H  AASP A  73      -2.748   9.723   0.173  0.64 10.73           H  
ATOM   1189  H  BASP A  73      -2.690   9.797   0.251  0.36 10.73           H  
ATOM   1190  HA  ASP A  73      -3.037   7.598   1.749  1.00  9.58           H  
ATOM   1191  HB2 ASP A  73      -0.932   8.273   0.002  1.00  9.01           H  
ATOM   1192  HB3 ASP A  73      -0.946   6.930   0.854  1.00  9.01           H  
ATOM   1193  N  ASER A  74      -1.486   9.951   2.972  0.63  7.37           N  
ANISOU 1193  N  ASER A  74      934    817   1049    360   -551   -344       N  
ATOM   1194  N  BSER A  74      -1.396   9.945   2.956  0.27  8.89           N  
ANISOU 1194  N  BSER A  74     1143   1122   1112    125    377    393       N  
ATOM   1195  N  CSER A  74      -1.448   9.950   2.961  0.10  8.94           N  
ANISOU 1195  N  CSER A  74     1148   1132   1116    113    372    387       N  
ATOM   1196  CA ASER A  74      -0.816  10.389   4.182  0.63  7.18           C  
ANISOU 1196  CA ASER A  74      836    800   1092    244   -446   -271       C  
ATOM   1197  CA BSER A  74      -0.712  10.323   4.178  0.27  9.89           C  
ANISOU 1197  CA BSER A  74     1621   1218    921    224    343    330       C  
ATOM   1198  CA CSER A  74      -0.780  10.388   4.172  0.10  9.95           C  
ANISOU 1198  CA CSER A  74     1624   1235    923    218    343    332       C  
ATOM   1199  C  ASER A  74      -1.549   9.892   5.439  0.63  6.63           C  
ANISOU 1199  C  ASER A  74      882    825    812     93   -199    -54       C  
ATOM   1200  C  BSER A  74      -1.486   9.737   5.355  0.27  7.22           C  
ANISOU 1200  C  BSER A  74      875    989    878    237    -40   -137       C  
ATOM   1201  C  CSER A  74      -1.517   9.837   5.392  0.10  7.30           C  
ANISOU 1201  C  CSER A  74      891   1003    879    222    -49   -130       C  
ATOM   1202  O  ASER A  74      -2.785   9.863   5.495  0.63  8.37           O  
ANISOU 1202  O  ASER A  74      841   1081   1258    278   -300    -70       O  
ATOM   1203  O  BSER A  74      -2.690   9.465   5.262  0.27  7.37           O  
ANISOU 1203  O  BSER A  74      715   1054   1033     -2    114   -226       O  
ATOM   1204  O  CSER A  74      -2.741   9.684   5.369  0.10  7.35           O  
ANISOU 1204  O  CSER A  74      707   1052   1035     -2    114   -232       O  
ATOM   1205  CB ASER A  74      -0.683  11.908   4.188  0.63  9.35           C  
ANISOU 1205  CB ASER A  74     1523   1013   1017    124   -277   -237       C  
ATOM   1206  CB BSER A  74      -0.646  11.830   4.313  0.27 13.01           C  
ANISOU 1206  CB BSER A  74     1586   1526   1832     80    447    743       C  
ATOM   1207  CB CSER A  74      -0.749  11.911   4.216  0.10 13.07           C  
ANISOU 1207  CB CSER A  74     1586   1544   1838     80    445    720       C  
ATOM   1208  OG ASER A  74       0.215  12.395   3.180  0.63  9.22           O  
ANISOU 1208  OG ASER A  74     1251    933   1318     87   -120    111       O  
ATOM   1209  OG BSER A  74      -1.953  12.345   4.312  0.27  9.84           O  
ANISOU 1209  OG BSER A  74     1242   1326   1170    -54   -162    311       O  
ATOM   1210  OG CSER A  74      -0.277  12.374   5.460  0.10  9.99           O  
ANISOU 1210  OG CSER A  74     1269   1334   1193    -50   -141    306       O  
ATOM   1211  H  ASER A  74      -1.802  10.585   2.485  0.63  8.84           H  
ATOM   1212  H  BSER A  74      -1.653  10.599   2.461  0.27 10.67           H  
ATOM   1213  H  CSER A  74      -1.738  10.587   2.462  0.10 10.72           H  
ATOM   1214  HA ASER A  74       0.088  10.010   4.195  0.63  8.62           H  
ATOM   1215  HA BSER A  74       0.198   9.960   4.180  0.27 11.87           H  
ATOM   1216  HA CSER A  74       0.141  10.054   4.182  0.10 11.94           H  
ATOM   1217  HB2ASER A  74      -1.559  12.295   4.034  0.63 11.22           H  
ATOM   1218  HB2BSER A  74      -0.210  12.059   5.148  0.27 15.62           H  
ATOM   1219  HB2CSER A  74      -0.159  12.234   3.516  0.10 15.69           H  
ATOM   1220  HB3ASER A  74      -0.352  12.185   5.056  0.63 11.22           H  
ATOM   1221  HB3BSER A  74      -0.154  12.199   3.562  0.27 15.62           H  
ATOM   1222  HB3CSER A  74      -1.647  12.249   4.074  0.10 15.69           H  
ATOM   1223  HG ASER A  74       0.259  13.213   3.215  0.63 11.06           H  
ATOM   1224  HG BSER A  74      -2.495  11.734   4.239  0.27 11.81           H  
ATOM   1225  HG CSER A  74      -0.101  11.738   5.947  0.10 11.99           H  
ATOM   1226  N   GLY A  75      -0.770   9.525   6.448  1.00  6.59           N  
ANISOU 1226  N   GLY A  75      737    884    884     36   -124     13       N  
ATOM   1227  CA  GLY A  75      -1.365   9.131   7.712  1.00  7.82           C  
ANISOU 1227  CA  GLY A  75     1004    952   1017    138     99     54       C  
ATOM   1228  C   GLY A  75      -0.573   8.087   8.458  1.00  6.34           C  
ANISOU 1228  C   GLY A  75      858    758    792    -71    -40    -74       C  
ATOM   1229  O   GLY A  75       0.584   7.811   8.159  1.00  6.14           O  
ANISOU 1229  O   GLY A  75      587    778    966    -78    -76     15       O  
ATOM   1230  H  AGLY A  75       0.089   9.496   6.426  0.64  7.91           H  
ATOM   1231  H  BGLY A  75       0.086   9.605   6.482  0.36  7.91           H  
ATOM   1232  HA2 GLY A  75      -1.449   9.912   8.281  1.00  9.39           H  
ATOM   1233  HA3 GLY A  75      -2.254   8.777   7.549  1.00  9.39           H  
ATOM   1234  N   LEU A  76      -1.234   7.530   9.469  1.00  6.55           N  
ANISOU 1234  N   LEU A  76      735    800    954      7    -75      8       N  
ATOM   1235  CA  LEU A  76      -0.664   6.551  10.367  1.00  6.28           C  
ANISOU 1235  CA  LEU A  76      753    744    890    -96    -71    -75       C  
ATOM   1236  C   LEU A  76      -0.802   5.168   9.776  1.00  5.77           C  
ANISOU 1236  C   LEU A  76      632    686    876    -94   -118   -134       C  
ATOM   1237  O   LEU A  76      -1.917   4.692   9.513  1.00  8.43           O  
ANISOU 1237  O   LEU A  76      623    884   1695   -111    -76   -416       O  
ATOM   1238  CB  LEU A  76      -1.406   6.592  11.713  1.00  7.55           C  
ANISOU 1238  CB  LEU A  76      956    929    983    -82     41   -192       C  
ATOM   1239  CG  LEU A  76      -1.073   5.471  12.681  1.00  8.13           C  
ANISOU 1239  CG  LEU A  76     1038   1057    995   -104    -35    -78       C  
ATOM   1240  CD1 LEU A  76       0.357   5.555  13.178  1.00  8.35           C  
ANISOU 1240  CD1 LEU A  76     1006   1176    991    -36     16    -66       C  
ATOM   1241  CD2 LEU A  76      -2.039   5.516  13.871  1.00  9.79           C  
ANISOU 1241  CD2 LEU A  76     1332   1304   1083     -3    177    -97       C  
ATOM   1242  H   LEU A  76      -2.052   7.718   9.656  1.00  7.86           H  
ATOM   1243  HA  LEU A  76       0.285   6.743  10.518  1.00  7.54           H  
ATOM   1244  HB2 LEU A  76      -1.195   7.429  12.154  1.00  9.06           H  
ATOM   1245  HB3 LEU A  76      -2.360   6.551  11.538  1.00  9.06           H  
ATOM   1246  HG  LEU A  76      -1.186   4.619  12.232  1.00  9.76           H  
ATOM   1247 HD11 LEU A  76       0.520   4.829  13.784  1.00 10.02           H  
ATOM   1248 HD12 LEU A  76       0.952   5.495  12.427  1.00 10.02           H  
ATOM   1249 HD13 LEU A  76       0.482   6.394  13.629  1.00 10.02           H  
ATOM   1250 HD21 LEU A  76      -1.821   4.804  14.477  1.00 11.75           H  
ATOM   1251 HD22 LEU A  76      -1.950   6.363  14.314  1.00 11.75           H  
ATOM   1252 HD23 LEU A  76      -2.937   5.407  13.548  1.00 11.75           H  
ATOM   1253  N   TYR A  77       0.315   4.478   9.580  1.00  5.37           N  
ANISOU 1253  N   TYR A  77      588    631    822    -85   -137    -11       N  
ATOM   1254  CA  TYR A  77       0.312   3.097   9.138  1.00  5.17           C  
ANISOU 1254  CA  TYR A  77      578    616    771    -95   -182      2       C  
ATOM   1255  C   TYR A  77       0.785   2.243  10.293  1.00  5.16           C  
ANISOU 1255  C   TYR A  77      642    609    711    -74   -213     14       C  
ATOM   1256  O   TYR A  77       1.846   2.509  10.880  1.00  6.37           O  
ANISOU 1256  O   TYR A  77      710    712   1000   -238   -356    125       O  
ATOM   1257  CB  TYR A  77       1.201   2.893   7.899  1.00  5.81           C  
ANISOU 1257  CB  TYR A  77      636    684    887   -103   -164    -23       C  
ATOM   1258  CG  TYR A  77       0.559   3.516   6.694  1.00  5.63           C  
ANISOU 1258  CG  TYR A  77      635    663    839    -84   -151     -1       C  
ATOM   1259  CD1 TYR A  77       0.605   4.879   6.477  1.00  5.67           C  
ANISOU 1259  CD1 TYR A  77      687    649    819    -58   -195     36       C  
ATOM   1260  CD2 TYR A  77      -0.158   2.740   5.802  1.00  7.05           C  
ANISOU 1260  CD2 TYR A  77      982    813    885   -202   -168    -94       C  
ATOM   1261  CE1 TYR A  77      -0.031   5.450   5.405  1.00  6.32           C  
ANISOU 1261  CE1 TYR A  77      806    632    963   -149   -173     96       C  
ATOM   1262  CE2 TYR A  77      -0.792   3.314   4.723  1.00  7.76           C  
ANISOU 1262  CE2 TYR A  77     1138    837    971   -289   -442     78       C  
ATOM   1263  CZ  TYR A  77      -0.732   4.659   4.516  1.00  7.25           C  
ANISOU 1263  CZ  TYR A  77     1019    733   1002   -226   -456    106       C  
ATOM   1264  OH  TYR A  77      -1.356   5.223   3.410  1.00  9.41           O  
ANISOU 1264  OH  TYR A  77     1503    967   1106   -262   -733    289       O  
ATOM   1265  H   TYR A  77       1.103   4.799   9.701  1.00  6.45           H  
ATOM   1266  HA  TYR A  77      -0.603   2.830   8.910  1.00  6.20           H  
ATOM   1267  HB2 TYR A  77       2.062   3.316   8.043  1.00  6.97           H  
ATOM   1268  HB3 TYR A  77       1.312   1.944   7.732  1.00  6.97           H  
ATOM   1269  HD1 TYR A  77       1.067   5.421   7.075  1.00  6.81           H  
ATOM   1270  HD2 TYR A  77      -0.215   1.821   5.935  1.00  8.46           H  
ATOM   1271  HE1 TYR A  77       0.024   6.368   5.268  1.00  7.58           H  
ATOM   1272  HE2 TYR A  77      -1.259   2.776   4.125  1.00  9.31           H  
ATOM   1273  HH  TYR A  77      -0.802   5.597   2.935  1.00 11.30           H  
ATOM   1274  N   THR A  78       0.005   1.218  10.614  1.00  5.22           N  
ANISOU 1274  N   THR A  78      604    602    778   -114   -229      4       N  
ATOM   1275  CA  THR A  78       0.321   0.277  11.687  1.00  5.09           C  
ANISOU 1275  CA  THR A  78      590    610    736    -80   -233    108       C  
ATOM   1276  C   THR A  78       0.328  -1.127  11.127  1.00  5.18           C  
ANISOU 1276  C   THR A  78      644    626    697    -78   -141     18       C  
ATOM   1277  O   THR A  78      -0.610  -1.537  10.453  1.00  6.44           O  
ANISOU 1277  O   THR A  78      613    740   1093    -33   -437   -136       O  
ATOM   1278  CB  THR A  78      -0.707   0.385  12.832  1.00  6.01           C  
ANISOU 1278  CB  THR A  78      759    701    824   -164    -66     19       C  
ATOM   1279  OG1 THR A  78      -0.683   1.707  13.361  1.00  7.43           O  
ANISOU 1279  OG1 THR A  78     1149    662   1011    -79     91   -170       O  
ATOM   1280  CG2 THR A  78      -0.422  -0.606  13.940  1.00  6.86           C  
ANISOU 1280  CG2 THR A  78      864    941    802    -98   -120     70       C  
ATOM   1281  H   THR A  78      -0.735   1.040  10.213  1.00  6.26           H  
ATOM   1282  HA  THR A  78       1.211   0.475  12.046  1.00  6.11           H  
ATOM   1283  HB  THR A  78      -1.592   0.200  12.482  1.00  7.21           H  
ATOM   1284  HG1 THR A  78      -1.227   1.775  13.971  1.00  8.91           H  
ATOM   1285 HG21 THR A  78      -1.076  -0.515  14.637  1.00  8.23           H  
ATOM   1286 HG22 THR A  78      -0.454  -1.501  13.596  1.00  8.23           H  
ATOM   1287 HG23 THR A  78       0.450  -0.444  14.308  1.00  8.23           H  
ATOM   1288  N   CYS A  79       1.386  -1.870  11.451  1.00  5.37           N  
ANISOU 1288  N   CYS A  79      646    652    743    -81   -246     15       N  
ATOM   1289  CA  CYS A  79       1.475  -3.279  11.161  1.00  5.36           C  
ANISOU 1289  CA  CYS A  79      624    654    759   -104   -272     18       C  
ATOM   1290  C   CYS A  79       1.381  -4.024  12.491  1.00  5.12           C  
ANISOU 1290  C   CYS A  79      700    603    643   -100   -180      3       C  
ATOM   1291  O   CYS A  79       2.258  -3.889  13.330  1.00  6.06           O  
ANISOU 1291  O   CYS A  79      846    785    670   -198   -285     88       O  
ATOM   1292  CB  CYS A  79       2.815  -3.579  10.516  1.00  5.66           C  
ANISOU 1292  CB  CYS A  79      771    766    614    -21   -188     59       C  
ATOM   1293  SG  CYS A  79       3.106  -5.336  10.224  1.00  6.51           S  
ANISOU 1293  SG  CYS A  79      979    680    814     63   -219      0       S  
ATOM   1294  H   CYS A  79       2.081  -1.560  11.851  1.00  6.45           H  
ATOM   1295  HA  CYS A  79       0.748  -3.562  10.568  1.00  6.44           H  
ATOM   1296  HB2 CYS A  79       2.859  -3.125   9.660  1.00  6.80           H  
ATOM   1297  HB3 CYS A  79       3.521  -3.255  11.097  1.00  6.80           H  
ATOM   1298  HG  CYS A  79       2.251  -5.758   9.494  1.00  7.81           H  
ATOM   1299  N   THR A  80       0.328  -4.817  12.650  1.00  5.38           N  
ANISOU 1299  N   THR A  80      680    609    755    -89   -236     56       N  
ATOM   1300  CA  THR A  80       0.199  -5.705  13.793  1.00  5.45           C  
ANISOU 1300  CA  THR A  80      700    600    772    -30   -199     86       C  
ATOM   1301  C   THR A  80       0.595  -7.100  13.366  1.00  5.56           C  
ANISOU 1301  C   THR A  80      855    560    695     15   -239    112       C  
ATOM   1302  O   THR A  80       0.005  -7.665  12.432  1.00  6.78           O  
ANISOU 1302  O   THR A  80     1038    671    867     21   -434    -58       O  
ATOM   1303  CB  THR A  80      -1.240  -5.708  14.348  1.00  6.74           C  
ANISOU 1303  CB  THR A  80      765    842    954    -64   -105     36       C  
ATOM   1304  OG1 THR A  80      -1.586  -4.393  14.758  1.00  7.35           O  
ANISOU 1304  OG1 THR A  80      818    939   1037     35    -37   -155       O  
ATOM   1305  CG2 THR A  80      -1.333  -6.623  15.529  1.00  9.16           C  
ANISOU 1305  CG2 THR A  80     1136   1179   1166   -200     73    101       C  
ATOM   1306  H   THR A  80      -0.333  -4.859  12.102  1.00  6.45           H  
ATOM   1307  HA  THR A  80       0.807  -5.413  14.505  1.00  6.54           H  
ATOM   1308  HB  THR A  80      -1.857  -6.013  13.665  1.00  8.09           H  
ATOM   1309  HG1 THR A  80      -1.542  -3.880  14.120  1.00  8.83           H  
ATOM   1310 HG21 THR A  80      -2.229  -6.623  15.873  1.00 10.99           H  
ATOM   1311 HG22 THR A  80      -1.098  -7.517  15.271  1.00 10.99           H  
ATOM   1312 HG23 THR A  80      -0.734  -6.329  16.219  1.00 10.99           H  
ATOM   1313  N   VAL A  81       1.603  -7.658  14.031  1.00  5.67           N  
ANISOU 1313  N   VAL A  81      850    656    646    -27   -202     37       N  
ATOM   1314  CA  VAL A  81       2.121  -8.983  13.778  1.00  6.28           C  
ANISOU 1314  CA  VAL A  81      953    733    701    110   -205     89       C  
ATOM   1315  C   VAL A  81       1.541  -9.900  14.849  1.00  5.51           C  
ANISOU 1315  C   VAL A  81      779    599    717     64   -215    -54       C  
ATOM   1316  O   VAL A  81       1.699  -9.640  16.042  1.00  6.33           O  
ANISOU 1316  O   VAL A  81     1030    668    708    -73   -115     13       O  
ATOM   1317  CB  VAL A  81       3.674  -8.977  13.815  1.00  8.41           C  
ANISOU 1317  CB  VAL A  81      948   1085   1164    220     25    399       C  
ATOM   1318  CG1 VAL A  81       4.223 -10.316  13.613  1.00  9.21           C  
ANISOU 1318  CG1 VAL A  81     1056   1234   1209     96     94    210       C  
ATOM   1319  CG2 VAL A  81       4.221  -7.967  12.806  1.00 10.99           C  
ANISOU 1319  CG2 VAL A  81     1104   1478   1592     99    113    704       C  
ATOM   1320  H   VAL A  81       2.019  -7.257  14.668  1.00  6.80           H  
ATOM   1321  HA  VAL A  81       1.826  -9.295  12.897  1.00  7.54           H  
ATOM   1322  HB  VAL A  81       3.957  -8.679  14.705  1.00 10.10           H  
ATOM   1323 HG11 VAL A  81       5.181 -10.268  13.644  1.00 11.05           H  
ATOM   1324 HG12 VAL A  81       3.901 -10.893  14.310  1.00 11.05           H  
ATOM   1325 HG13 VAL A  81       3.938 -10.645  12.758  1.00 11.05           H  
ATOM   1326 HG21 VAL A  81       5.181  -7.978  12.843  1.00 13.18           H  
ATOM   1327 HG22 VAL A  81       3.925  -8.213  11.926  1.00 13.18           H  
ATOM   1328 HG23 VAL A  81       3.894  -7.093  13.030  1.00 13.18           H  
ATOM   1329  N   LYS A  82       0.850 -10.945  14.428  1.00  6.25           N  
ANISOU 1329  N   LYS A  82      855    737    784     51   -198     40       N  
ATOM   1330  CA  LYS A  82       0.009 -11.731  15.328  1.00  6.81           C  
ANISOU 1330  CA  LYS A  82      828    861    898    -81   -129     14       C  
ATOM   1331  C   LYS A  82       0.165 -13.209  15.124  1.00  6.50           C  
ANISOU 1331  C   LYS A  82      906    654    909    -63   -202      2       C  
ATOM   1332  O   LYS A  82       0.266 -13.700  14.006  1.00  8.11           O  
ANISOU 1332  O   LYS A  82     1459    751    872     30   -195   -101       O  
ATOM   1333  CB  LYS A  82      -1.454 -11.328  15.129  1.00  9.87           C  
ANISOU 1333  CB  LYS A  82      944   1348   1458    -19   -119     63       C  
ATOM   1334  CG  LYS A  82      -2.462 -12.117  15.976  1.00 16.13           C  
ANISOU 1334  CG  LYS A  82     1561   2140   2426    -18   -258   -178       C  
ATOM   1335  CD  LYS A  82      -3.806 -11.442  16.083  1.00 23.33           C  
ANISOU 1335  CD  LYS A  82     1829   2905   4132    219    153   -334       C  
ATOM   1336  CE  LYS A  82      -4.480 -11.387  14.765  1.00 24.90           C  
ANISOU 1336  CE  LYS A  82     2415   3220   3826    368    -60   -677       C  
ATOM   1337  NZ  LYS A  82      -5.869 -10.837  14.931  1.00 24.07           N  
ANISOU 1337  NZ  LYS A  82     2146   3354   3644    779  -1300   -181       N  
ATOM   1338  H   LYS A  82       0.849 -11.228  13.616  1.00  7.51           H  
ATOM   1339  HA  LYS A  82       0.256 -11.526  16.254  1.00  8.17           H  
ATOM   1340  HB2 LYS A  82      -1.550 -10.390  15.357  1.00 11.84           H  
ATOM   1341  HB3 LYS A  82      -1.687 -11.461  14.196  1.00 11.84           H  
ATOM   1342  HG2 LYS A  82      -2.598 -12.989  15.574  1.00 19.35           H  
ATOM   1343  HG3 LYS A  82      -2.107 -12.219  16.873  1.00 19.35           H  
ATOM   1344  HD2 LYS A  82      -4.369 -11.942  16.694  1.00 28.00           H  
ATOM   1345  HD3 LYS A  82      -3.685 -10.534  16.402  1.00 28.00           H  
ATOM   1346  HE2 LYS A  82      -3.985 -10.804  14.169  1.00 29.88           H  
ATOM   1347  HE3 LYS A  82      -4.544 -12.281  14.394  1.00 29.88           H  
ATOM   1348  HZ1 LYS A  82      -6.278 -10.802  14.142  1.00 28.88           H  
ATOM   1349  HZ2 LYS A  82      -6.339 -11.358  15.478  1.00 28.88           H  
ATOM   1350  HZ3 LYS A  82      -5.831 -10.016  15.274  1.00 28.88           H  
ATOM   1351  N   ASN A  83       0.116 -13.948  16.228  1.00  6.91           N  
ANISOU 1351  N   ASN A  83      985    709    932    -10   -118    -39       N  
ATOM   1352  CA  ASN A  83      -0.028 -15.379  16.174  1.00  7.00           C  
ANISOU 1352  CA  ASN A  83     1026    729    905   -107   -111    -78       C  
ATOM   1353  C   ASN A  83      -0.958 -15.784  17.340  1.00  7.59           C  
ANISOU 1353  C   ASN A  83     1137    661   1085   -124   -108    -11       C  
ATOM   1354  O   ASN A  83      -1.530 -14.918  18.034  1.00  7.82           O  
ANISOU 1354  O   ASN A  83     1025    658   1287   -106    -83      6       O  
ATOM   1355  CB  ASN A  83       1.313 -16.116  16.188  1.00  7.41           C  
ANISOU 1355  CB  ASN A  83     1017    798    999     59   -201   -114       C  
ATOM   1356  CG  ASN A  83       2.099 -15.879  17.444  1.00  6.84           C  
ANISOU 1356  CG  ASN A  83      958    643    997    -66     10     80       C  
ATOM   1357  OD1 ASN A  83       1.561 -15.428  18.451  1.00  6.91           O  
ANISOU 1357  OD1 ASN A  83     1043    616    967    -74    -47     -6       O  
ATOM   1358  ND2 ASN A  83       3.379 -16.220  17.410  1.00  7.28           N  
ANISOU 1358  ND2 ASN A  83      976    798    992     74    -65     43       N  
ATOM   1359  H   ASN A  83       0.165 -13.631  17.026  1.00  8.29           H  
ATOM   1360  HA  ASN A  83      -0.484 -15.614  15.339  1.00  8.40           H  
ATOM   1361  HB2 ASN A  83       1.149 -17.069  16.112  1.00  8.89           H  
ATOM   1362  HB3 ASN A  83       1.848 -15.811  15.438  1.00  8.89           H  
ATOM   1363 HD21 ASN A  83       3.873 -16.105  18.104  1.00  8.74           H  
ATOM   1364 HD22 ASN A  83       3.715 -16.558  16.694  1.00  8.74           H  
ATOM   1365  N   SER A  84      -1.092 -17.078  17.550  1.00  8.35           N  
ANISOU 1365  N   SER A  84     1000    757   1415   -149     82    -28       N  
ATOM   1366  CA  SER A  84      -2.002 -17.533  18.584  1.00  9.30           C  
ANISOU 1366  CA  SER A  84     1209    907   1418   -314    111     39       C  
ATOM   1367  C   SER A  84      -1.495 -17.241  19.994  1.00  8.88           C  
ANISOU 1367  C   SER A  84     1156    811   1408   -116    143    208       C  
ATOM   1368  O   SER A  84      -2.247 -17.417  20.939  1.00 10.68           O  
ANISOU 1368  O   SER A  84     1451   1188   1420   -181    182    157       O  
ATOM   1369  CB  SER A  84      -2.265 -19.008  18.375  1.00 11.98           C  
ANISOU 1369  CB  SER A  84     1475   1248   1828   -403    264     87       C  
ATOM   1370  OG  SER A  84      -1.066 -19.721  18.283  1.00 11.74           O  
ANISOU 1370  OG  SER A  84     1596   1138   1726    -79     14    121       O  
ATOM   1371  H   SER A  84      -0.681 -17.700  17.122  1.00 10.02           H  
ATOM   1372  HA  SER A  84      -2.855 -17.063  18.476  1.00 11.16           H  
ATOM   1373  HB2 SER A  84      -2.776 -19.347  19.127  1.00 14.37           H  
ATOM   1374  HB3 SER A  84      -2.766 -19.125  17.553  1.00 14.37           H  
ATOM   1375  HG  SER A  84      -1.222 -20.518  18.170  1.00 14.09           H  
ATOM   1376  N   ALA A  85      -0.272 -16.743  20.145  1.00  8.47           N  
ANISOU 1376  N   ALA A  85     1224    785   1207   -172    140     48       N  
ATOM   1377  CA  ALA A  85       0.296 -16.354  21.427  1.00  8.05           C  
ANISOU 1377  CA  ALA A  85     1092    852   1114     19     99    184       C  
ATOM   1378  C   ALA A  85       0.133 -14.883  21.732  1.00  6.78           C  
ANISOU 1378  C   ALA A  85      987    777    810     52     60     66       C  
ATOM   1379  O   ALA A  85       0.422 -14.505  22.857  1.00  8.92           O  
ANISOU 1379  O   ALA A  85     1274    842   1274    152   -165     16       O  
ATOM   1380  CB  ALA A  85       1.764 -16.754  21.520  1.00  9.88           C  
ANISOU 1380  CB  ALA A  85     1475   1181   1100    299   -123     48       C  
ATOM   1381  H   ALA A  85       0.268 -16.616  19.488  1.00 10.16           H  
ATOM   1382  HA  ALA A  85      -0.180 -16.845  22.129  1.00  9.66           H  
ATOM   1383  HB1 ALA A  85       2.107 -16.484  22.375  1.00 11.86           H  
ATOM   1384  HB2 ALA A  85       1.834 -17.707  21.425  1.00 11.86           H  
ATOM   1385  HB3 ALA A  85       2.252 -16.318  20.818  1.00 11.86           H  
ATOM   1386  N   GLY A  86      -0.269 -14.066  20.762  1.00  7.53           N  
ANISOU 1386  N   GLY A  86     1248    680    932   -135    -26     71       N  
ATOM   1387  CA  GLY A  86      -0.439 -12.652  21.018  1.00  7.25           C  
ANISOU 1387  CA  GLY A  86     1167    709    877    -37      7     20       C  
ATOM   1388  C   GLY A  86       0.016 -11.857  19.817  1.00  5.86           C  
ANISOU 1388  C   GLY A  86      907    571    749    -77    -75     11       C  
ATOM   1389  O   GLY A  86       0.103 -12.394  18.714  1.00  7.04           O  
ANISOU 1389  O   GLY A  86     1218    602    853   -118      5     25       O  
ATOM   1390  H   GLY A  86      -0.447 -14.309  19.957  1.00  9.04           H  
ATOM   1391  HA2 GLY A  86      -1.374 -12.456  21.191  1.00  8.70           H  
ATOM   1392  HA3 GLY A  86       0.087 -12.388  21.789  1.00  8.70           H  
ATOM   1393  N   SER A  87       0.246 -10.568  20.025  1.00  5.44           N  
ANISOU 1393  N   SER A  87      814    589    665    -70    -92     12       N  
ATOM   1394  CA  SER A  87       0.599  -9.697  18.930  1.00  5.78           C  
ANISOU 1394  CA  SER A  87      771    654    772    -42    -98     -4       C  
ATOM   1395  C   SER A  87       1.516  -8.604  19.412  1.00  5.28           C  
ANISOU 1395  C   SER A  87      646    570    788    -33    -96     10       C  
ATOM   1396  O   SER A  87       1.691  -8.374  20.612  1.00  6.22           O  
ANISOU 1396  O   SER A  87      967    754    641   -144   -111     -8       O  
ATOM   1397  CB  SER A  87      -0.647  -9.108  18.257  1.00  7.40           C  
ANISOU 1397  CB  SER A  87      841    924   1047   -104   -191    138       C  
ATOM   1398  OG  SER A  87      -1.419  -8.324  19.118  1.00  8.67           O  
ANISOU 1398  OG  SER A  87      943   1094   1260    171   -116    197       O  
ATOM   1399  H   SER A  87       0.203 -10.179  20.790  1.00  6.53           H  
ATOM   1400  HA  SER A  87       1.084 -10.219  18.257  1.00  6.94           H  
ATOM   1401  HB2 SER A  87      -0.363  -8.557  17.511  1.00  8.88           H  
ATOM   1402  HB3 SER A  87      -1.195  -9.838  17.931  1.00  8.88           H  
ATOM   1403  HG  SER A  87      -2.072  -8.030  18.719  1.00 10.41           H  
ATOM   1404  N   VAL A  88       2.115  -7.912  18.439  1.00  5.00           N  
ANISOU 1404  N   VAL A  88      734    499    669    -33   -110     25       N  
ATOM   1405  CA  VAL A  88       2.872  -6.704  18.681  1.00  5.08           C  
ANISOU 1405  CA  VAL A  88      609    564    758    -12   -150    106       C  
ATOM   1406  C   VAL A  88       2.761  -5.874  17.416  1.00  4.70           C  
ANISOU 1406  C   VAL A  88      596    516    674    -31   -153     34       C  
ATOM   1407  O   VAL A  88       2.639  -6.437  16.313  1.00  6.02           O  
ANISOU 1407  O   VAL A  88     1079    511    698    -61   -181     -3       O  
ATOM   1408  CB  VAL A  88       4.349  -7.009  19.001  1.00  6.13           C  
ANISOU 1408  CB  VAL A  88      720    737    874     42   -202    133       C  
ATOM   1409  CG1 VAL A  88       5.103  -7.588  17.804  1.00  7.42           C  
ANISOU 1409  CG1 VAL A  88      627    891   1300     96    -86    -84       C  
ATOM   1410  CG2 VAL A  88       5.060  -5.785  19.522  1.00  6.46           C  
ANISOU 1410  CG2 VAL A  88      703    937    813     31   -316    -89       C  
ATOM   1411  H   VAL A  88       2.091  -8.138  17.610  1.00  6.00           H  
ATOM   1412  HA  VAL A  88       2.479  -6.205  19.427  1.00  6.10           H  
ATOM   1413  HB  VAL A  88       4.374  -7.682  19.712  1.00  7.36           H  
ATOM   1414 HG11 VAL A  88       6.013  -7.757  18.060  1.00  8.90           H  
ATOM   1415 HG12 VAL A  88       4.680  -8.408  17.535  1.00  8.90           H  
ATOM   1416 HG13 VAL A  88       5.078  -6.955  17.082  1.00  8.90           H  
ATOM   1417 HG21 VAL A  88       5.974  -6.011  19.709  1.00  7.75           H  
ATOM   1418 HG22 VAL A  88       5.023  -5.095  18.855  1.00  7.75           H  
ATOM   1419 HG23 VAL A  88       4.624  -5.489  20.324  1.00  7.75           H  
ATOM   1420  N  ASER A  89       2.795  -4.562  17.530  0.57  4.88           N  
ANISOU 1420  N  ASER A  89      588    548    720    104   -131    -80       N  
ATOM   1421  N  BSER A  89       2.816  -4.560  17.562  0.43  5.17           N  
ANISOU 1421  N  BSER A  89      875    691    397   -273   -341    208       N  
ATOM   1422  CA ASER A  89       2.726  -3.733  16.340  0.57  4.77           C  
ANISOU 1422  CA ASER A  89      730    566    517     65   -324    -25       C  
ATOM   1423  CA BSER A  89       2.641  -3.663  16.423  0.43  6.13           C  
ANISOU 1423  CA BSER A  89      726    804    801   -167   -137    332       C  
ATOM   1424  C  ASER A  89       3.925  -2.827  16.212  0.57  5.01           C  
ANISOU 1424  C  ASER A  89      702    617    584      7   -363     -8       C  
ATOM   1425  C  BSER A  89       3.804  -2.697  16.261  0.43  6.21           C  
ANISOU 1425  C  BSER A  89      751    802    807   -213   -211    200       C  
ATOM   1426  O  ASER A  89       4.728  -2.654  17.127  0.57  5.44           O  
ANISOU 1426  O  ASER A  89      663    617    786    109   -309     97       O  
ATOM   1427  O  BSER A  89       4.471  -2.338  17.228  0.43  6.68           O  
ANISOU 1427  O  BSER A  89     1001    880    656   -356   -355    190       O  
ATOM   1428  CB ASER A  89       1.448  -2.882  16.287  0.57  5.35           C  
ANISOU 1428  CB ASER A  89      592    638    805     20    -54   -141       C  
ATOM   1429  CB BSER A  89       1.353  -2.852  16.584  0.43  6.93           C  
ANISOU 1429  CB BSER A  89      860    913    861    -33   -478    516       C  
ATOM   1430  OG ASER A  89       1.424  -1.902  17.305  0.57  5.87           O  
ANISOU 1430  OG ASER A  89      737    627    867     52   -133    -73       O  
ATOM   1431  OG BSER A  89       0.228  -3.709  16.765  0.43  6.09           O  
ANISOU 1431  OG BSER A  89      695    866    753    -26   -222    127       O  
ATOM   1432  H  ASER A  89       2.858  -4.129  18.271  0.57  5.86           H  
ATOM   1433  H  BSER A  89       2.954  -4.158  18.309  0.43  6.20           H  
ATOM   1434  HA ASER A  89       2.719  -4.320  15.556  0.57  5.73           H  
ATOM   1435  HA BSER A  89       2.568  -4.194  15.603  0.43  7.36           H  
ATOM   1436  HB2ASER A  89       1.404  -2.439  15.425  0.57  6.43           H  
ATOM   1437  HB2BSER A  89       1.438  -2.275  17.359  0.43  8.32           H  
ATOM   1438  HB3ASER A  89       0.681  -3.465  16.396  0.57  6.43           H  
ATOM   1439  HB3BSER A  89       1.215  -2.317  15.786  0.43  8.32           H  
ATOM   1440  HG ASER A  89       2.105  -1.952  17.759  0.57  7.05           H  
ATOM   1441  HG BSER A  89      -0.455  -3.263  16.850  0.43  7.30           H  
ATOM   1442  N   SER A  90       4.005  -2.244  15.021  1.00  5.80           N  
ANISOU 1442  N   SER A  90      792    811    601   -172   -281    128       N  
ATOM   1443  CA  SER A  90       4.945  -1.190  14.729  1.00  6.46           C  
ANISOU 1443  CA  SER A  90      687    901    868   -225   -315    209       C  
ATOM   1444  C   SER A  90       4.232  -0.198  13.822  1.00  6.11           C  
ANISOU 1444  C   SER A  90      743    874    703   -199   -351    308       C  
ATOM   1445  O   SER A  90       3.401  -0.602  12.998  1.00  7.60           O  
ANISOU 1445  O   SER A  90     1060    869    957   -367   -630    278       O  
ATOM   1446  CB  SER A  90       6.174  -1.758  14.026  1.00  7.43           C  
ANISOU 1446  CB  SER A  90      765   1173    887    -77    -79    306       C  
ATOM   1447  OG  SER A  90       7.170  -0.779  13.893  1.00  8.50           O  
ANISOU 1447  OG  SER A  90      742   1431   1057   -158   -176    378       O  
ATOM   1448  H  ASER A  90       3.508  -2.454  14.352  0.57  6.96           H  
ATOM   1449  H  BSER A  90       3.596  -2.545  14.327  0.43  6.96           H  
ATOM   1450  HA  SER A  90       5.221  -0.738  15.554  1.00  7.75           H  
ATOM   1451  HB2 SER A  90       6.524  -2.496  14.550  1.00  8.92           H  
ATOM   1452  HB3 SER A  90       5.917  -2.070  13.144  1.00  8.92           H  
ATOM   1453  HG  SER A  90       6.913  -0.072  14.218  1.00 10.20           H  
ATOM   1454  N   SER A  91       4.535   1.084  13.957  1.00  6.26           N  
ANISOU 1454  N   SER A  91      690    839    850   -184   -376    234       N  
ATOM   1455  CA ASER A  91       3.784   2.135  13.288  0.73  6.14           C  
ANISOU 1455  CA ASER A  91      782    761    792   -157   -283     68       C  
ATOM   1456  CA BSER A  91       3.782   2.098  13.226  0.27  7.31           C  
ANISOU 1456  CA BSER A  91      711    966   1100   -282   -208    113       C  
ATOM   1457  C   SER A  91       4.661   3.264  12.809  1.00  6.45           C  
ANISOU 1457  C   SER A  91      813    798    841   -175   -313    117       C  
ATOM   1458  O   SER A  91       5.752   3.493  13.354  1.00  7.00           O  
ANISOU 1458  O   SER A  91      865    815    980   -287   -431    129       O  
ATOM   1459  CB ASER A  91       2.778   2.737  14.246  0.73  6.95           C  
ANISOU 1459  CB ASER A  91      926    858    855    178   -196    -24       C  
ATOM   1460  CB BSER A  91       2.558   2.608  14.030  0.27 10.80           C  
ANISOU 1460  CB BSER A  91     1379   1349   1377   -686    292    -33       C  
ATOM   1461  OG ASER A  91       1.835   1.776  14.612  0.73  6.69           O  
ANISOU 1461  OG ASER A  91      605    899   1039    -48   -155    183       O  
ATOM   1462  OG BSER A  91       2.917   3.428  15.140  0.27 10.82           O  
ANISOU 1462  OG BSER A  91     1004   1466   1641   -686    217    -99       O  
ATOM   1463  H  ASER A  91       5.184   1.377  14.440  0.73  7.51           H  
ATOM   1464  H  BSER A  91       5.163   1.393  14.457  0.27  7.51           H  
ATOM   1465  HA ASER A  91       3.303   1.761  12.519  0.73  7.37           H  
ATOM   1466  HA BSER A  91       3.438   1.689  12.405  0.27  8.77           H  
ATOM   1467  HB2ASER A  91       3.241   3.047  15.040  0.73  8.34           H  
ATOM   1468  HB2BSER A  91       1.992   3.126  13.436  0.27 12.96           H  
ATOM   1469  HB3ASER A  91       2.327   3.477  13.812  0.73  8.34           H  
ATOM   1470  HB3BSER A  91       2.065   1.841  14.361  0.27 12.96           H  
ATOM   1471  HG ASER A  91       1.290   2.101  15.131  0.73  8.03           H  
ATOM   1472  HG BSER A  91       2.243   3.675  15.536  0.27 12.98           H  
ATOM   1473  N   CYS A  92       4.154   4.013  11.835  1.00  6.47           N  
ANISOU 1473  N   CYS A  92      726    779    954   -223   -314    160       N  
ATOM   1474  CA  CYS A  92       4.800   5.236  11.429  1.00  6.26           C  
ANISOU 1474  CA  CYS A  92      705    780    892   -226   -274    121       C  
ATOM   1475  C   CYS A  92       3.832   6.152  10.729  1.00  6.12           C  
ANISOU 1475  C   CYS A  92      708    817    801   -267   -148    -22       C  
ATOM   1476  O   CYS A  92       2.719   5.758  10.389  1.00  6.76           O  
ANISOU 1476  O   CYS A  92      675    711   1183   -182   -239    118       O  
ATOM   1477  CB  CYS A  92       5.974   4.946  10.503  1.00  7.18           C  
ANISOU 1477  CB  CYS A  92      664    893   1172   -247   -233    203       C  
ATOM   1478  SG  CYS A  92       5.455   4.371   8.863  1.00  7.60           S  
ANISOU 1478  SG  CYS A  92      991    986    911     51   -212     67       S  
ATOM   1479  H   CYS A  92       3.437   3.828  11.398  1.00  7.76           H  
ATOM   1480  HA  CYS A  92       5.142   5.699  12.222  1.00  7.51           H  
ATOM   1481  HB2 CYS A  92       6.491   5.758  10.385  1.00  8.62           H  
ATOM   1482  HB3 CYS A  92       6.527   4.255  10.901  1.00  8.62           H  
ATOM   1483  HG  CYS A  92       6.430   4.165   8.194  1.00  9.12           H  
ATOM   1484  N  ALYS A  93       4.277   7.373  10.541  0.89  5.77           N  
ANISOU 1484  N  ALYS A  93      746    592    854   -182   -279    137       N  
ATOM   1485  N  BLYS A  93       4.272   7.387  10.525  0.11  9.88           N  
ANISOU 1485  N  BLYS A  93     1122   1482   1150   -372   -243     87       N  
ATOM   1486  CA ALYS A  93       3.538   8.362   9.791  0.89  6.80           C  
ANISOU 1486  CA ALYS A  93      744    857    984   -128   -128    -28       C  
ATOM   1487  CA BLYS A  93       3.508   8.366   9.777  0.11 14.57           C  
ANISOU 1487  CA BLYS A  93     1601   2263   1670   -345   -232    205       C  
ATOM   1488  C  ALYS A  93       4.115   8.457   8.382  0.89  6.21           C  
ANISOU 1488  C  ALYS A  93      629    750    979    -41    -81    123       C  
ATOM   1489  C  BLYS A  93       4.103   8.521   8.382  0.11  9.27           C  
ANISOU 1489  C  BLYS A  93     1017   1294   1212   -334   -222    413       C  
ATOM   1490  O  ALYS A  93       5.317   8.688   8.229  0.89  6.78           O  
ANISOU 1490  O  ALYS A  93      710    875    990   -109   -205    158       O  
ATOM   1491  O  BLYS A  93       5.294   8.791   8.225  0.11  8.66           O  
ANISOU 1491  O  BLYS A  93      957    970   1361   -652   -221    558       O  
ATOM   1492  CB ALYS A  93       3.672   9.722  10.475  0.89 10.93           C  
ANISOU 1492  CB ALYS A  93     1001   2107   1044    -39    -63    -69       C  
ATOM   1493  CB BLYS A  93       3.513   9.717  10.497  0.11 27.41           C  
ANISOU 1493  CB BLYS A  93     3052   4242   3120   -287   -783    103       C  
ATOM   1494  CG ALYS A  93       2.933  10.863   9.804  0.89 31.68           C  
ANISOU 1494  CG ALYS A  93     3402   4828   3806     73  -1649   -220       C  
ATOM   1495  CG BLYS A  93       2.941   9.697  11.912  0.11 44.43           C  
ANISOU 1495  CG BLYS A  93     5144   6532   5207   -200  -1197     63       C  
ATOM   1496  CD ALYS A  93       3.039  12.160  10.614  0.89 58.14           C  
ANISOU 1496  CD ALYS A  93     6958   7986   7146     24  -1818   -285       C  
ATOM   1497  CD BLYS A  93       1.438   9.460  11.916  0.11 63.11           C  
ANISOU 1497  CD BLYS A  93     7481   8956   7542   -147  -1573     31       C  
ATOM   1498  CE ALYS A  93       4.131  13.091  10.088  0.89 79.26           C  
ANISOU 1498  CE ALYS A  93     9689  10697   9730    -54  -1969   -221       C  
ATOM   1499  CE BLYS A  93       0.774  10.128  10.723  0.11 80.84           C  
ANISOU 1499  CE BLYS A  93     9735  11158   9822   -114  -1910     17       C  
ATOM   1500  NZ ALYS A  93       5.513  12.585  10.321  0.89 93.76           N  
ANISOU 1500  NZ ALYS A  93    11586  12374  11667    -88  -2218   -174       N  
ATOM   1501  NZ BLYS A  93      -0.376  10.987  11.114  0.11 94.83           N  
ANISOU 1501  NZ BLYS A  93    11663  12620  11749    -95  -2080     12       N  
ATOM   1502  N   LEU A  94       3.261   8.336   7.374  1.00  6.47           N  
ANISOU 1502  N   LEU A  94      632    847    979   -133   -150     97       N  
ATOM   1503  CA  LEU A  94       3.624   8.576   5.977  1.00  6.50           C  
ANISOU 1503  CA  LEU A  94      675    791   1003    -64    -93     19       C  
ATOM   1504  C   LEU A  94       3.187   9.980   5.594  1.00  6.19           C  
ANISOU 1504  C   LEU A  94      715    720    919    -18   -119     -7       C  
ATOM   1505  O   LEU A  94       2.029  10.359   5.805  1.00  6.82           O  
ANISOU 1505  O   LEU A  94      660    781   1151     51    -89      7       O  
ATOM   1506  CB  LEU A  94       2.901   7.574   5.078  1.00  6.30           C  
ANISOU 1506  CB  LEU A  94      656    814    924   -110   -129    -53       C  
ATOM   1507  CG  LEU A  94       3.206   7.705   3.577  1.00  6.91           C  
ANISOU 1507  CG  LEU A  94      758    896    971      2   -251    -50       C  
ATOM   1508  CD1 LEU A  94       4.658   7.448   3.285  1.00  7.73           C  
ANISOU 1508  CD1 LEU A  94      823   1062   1054    -28     29    -94       C  
ATOM   1509  CD2 LEU A  94       2.313   6.747   2.795  1.00  8.24           C  
ANISOU 1509  CD2 LEU A  94      936   1105   1092   -113   -115   -149       C  
ATOM   1510  H  ALEU A  94       2.438   8.110   7.475  0.88  7.76           H  
ATOM   1511  H  BLEU A  94       2.451   8.065   7.473  0.12  7.76           H  
ATOM   1512  HA  LEU A  94       4.592   8.489   5.853  1.00  7.80           H  
ATOM   1513  HB2 LEU A  94       3.153   6.677   5.351  1.00  7.56           H  
ATOM   1514  HB3 LEU A  94       1.945   7.690   5.193  1.00  7.56           H  
ATOM   1515  HG  LEU A  94       2.999   8.608   3.291  1.00  8.29           H  
ATOM   1516 HD11 LEU A  94       4.807   7.539   2.342  1.00  9.28           H  
ATOM   1517 HD12 LEU A  94       5.190   8.087   3.765  1.00  9.28           H  
ATOM   1518 HD13 LEU A  94       4.881   6.558   3.568  1.00  9.28           H  
ATOM   1519 HD21 LEU A  94       2.507   6.833   1.858  1.00  9.89           H  
ATOM   1520 HD22 LEU A  94       2.488   5.849   3.085  1.00  9.89           H  
ATOM   1521 HD23 LEU A  94       1.394   6.972   2.960  1.00  9.89           H  
ATOM   1522  N   THR A  95       4.115  10.722   4.995  1.00  6.44           N  
ANISOU 1522  N   THR A  95      714    679   1053    -45   -119     57       N  
ATOM   1523  CA  THR A  95       3.837  12.017   4.419  1.00  7.26           C  
ANISOU 1523  CA  THR A  95      743    772   1242    -11    -96     30       C  
ATOM   1524  C   THR A  95       3.986  11.902   2.909  1.00  7.53           C  
ANISOU 1524  C   THR A  95      820    924   1115     53   -125    126       C  
ATOM   1525  O   THR A  95       4.975  11.388   2.418  1.00  7.80           O  
ANISOU 1525  O   THR A  95      818    934   1212    192   -229     73       O  
ATOM   1526  CB  THR A  95       4.820  13.049   4.963  1.00  8.85           C  
ANISOU 1526  CB  THR A  95     1162    946   1256    -88   -131     16       C  
ATOM   1527  OG1 THR A  95       4.627  13.153   6.384  1.00  9.76           O  
ANISOU 1527  OG1 THR A  95     1318   1039   1351    -74   -170   -116       O  
ATOM   1528  CG2 THR A  95       4.627  14.405   4.344  1.00 12.06           C  
ANISOU 1528  CG2 THR A  95     1595   1371   1617    -98   -144     73       C  
ATOM   1529  H   THR A  95       4.937  10.482   4.912  1.00  7.72           H  
ATOM   1530  HA  THR A  95       2.922  12.296   4.634  1.00  8.71           H  
ATOM   1531  HB  THR A  95       5.727  12.757   4.782  1.00 10.62           H  
ATOM   1532  HG1 THR A  95       3.858  13.390   6.546  1.00 11.71           H  
ATOM   1533 HG21 THR A  95       5.262  15.026   4.710  1.00 14.47           H  
ATOM   1534 HG22 THR A  95       4.754  14.353   3.394  1.00 14.47           H  
ATOM   1535 HG23 THR A  95       3.740  14.724   4.523  1.00 14.47           H  
ATOM   1536  N   ILE A  96       2.989  12.363   2.182  1.00 10.01           N  
ANISOU 1536  N   ILE A  96      956   1547   1302    441   -173    284       N  
ATOM   1537  CA  ILE A  96       3.056  12.384   0.725  1.00 11.12           C  
ANISOU 1537  CA  ILE A  96      920   1934   1370    399   -297    417       C  
ATOM   1538  C   ILE A  96       3.415  13.795   0.284  1.00 12.65           C  
ANISOU 1538  C   ILE A  96     1537   1793   1478    863   -115    369       C  
ATOM   1539  O   ILE A  96       2.736  14.764   0.639  1.00 18.16           O  
ANISOU 1539  O   ILE A  96     2983   2019   1899   1741    352    522       O  
ATOM   1540  CB  ILE A  96       1.736  11.905   0.078  1.00 13.38           C  
ANISOU 1540  CB  ILE A  96     1007   2532   1544   -198   -403    871       C  
ATOM   1541  CG1 ILE A  96       1.412  10.469   0.504  1.00 17.16           C  
ANISOU 1541  CG1 ILE A  96     1572   2925   2023  -1145   -897   1161       C  
ATOM   1542  CG2 ILE A  96       1.848  11.988  -1.436  1.00 13.78           C  
ANISOU 1542  CG2 ILE A  96     1445   2365   1425   -110   -295    510       C  
ATOM   1543  CD1 ILE A  96       2.460   9.446   0.131  1.00 22.24           C  
ANISOU 1543  CD1 ILE A  96     3144   3272   2034  -1943  -1269   1080       C  
ATOM   1544  H   ILE A  96       2.255  12.674   2.505  1.00 12.02           H  
ATOM   1545  HA  ILE A  96       3.772  11.783   0.431  1.00 13.34           H  
ATOM   1546  HB  ILE A  96       1.016  12.486   0.370  1.00 16.05           H  
ATOM   1547 HG12 ILE A  96       1.312  10.448   1.469  1.00 20.59           H  
ATOM   1548 HG13 ILE A  96       0.580  10.201   0.085  1.00 20.59           H  
ATOM   1549 HG21 ILE A  96       1.023  11.689  -1.827  1.00 16.53           H  
ATOM   1550 HG22 ILE A  96       2.017  12.899  -1.687  1.00 16.53           H  
ATOM   1551 HG23 ILE A  96       2.571  11.427  -1.727  1.00 16.53           H  
ATOM   1552 HD11 ILE A  96       2.175   8.581   0.436  1.00 26.69           H  
ATOM   1553 HD12 ILE A  96       2.564   9.439  -0.823  1.00 26.69           H  
ATOM   1554 HD13 ILE A  96       3.291   9.683   0.550  1.00 26.69           H  
ATOM   1555  N   LYS A  97       4.515  13.901  -0.453  1.00 11.95           N  
ANISOU 1555  N   LYS A  97     1469   1695   1377    421    -16    164       N  
ATOM   1556  CA  LYS A  97       4.958  15.190  -0.964  1.00 18.54           C  
ANISOU 1556  CA  LYS A  97     2881   2678   1487    416   -448     41       C  
ATOM   1557  C   LYS A  97       4.460  15.389  -2.371  1.00 13.04           C  
ANISOU 1557  C   LYS A  97     2110   1526   1318    218   -639    181       C  
ATOM   1558  O   LYS A  97       4.786  14.619  -3.286  1.00 12.24           O  
ANISOU 1558  O   LYS A  97     2062    963   1628     62   -213     21       O  
ATOM   1559  CB  LYS A  97       6.481  15.287  -0.924  1.00 39.36           C  
ANISOU 1559  CB  LYS A  97     4863   5624   4470    315  -2019    194       C  
ATOM   1560  CG  LYS A  97       7.025  16.617  -1.410  1.00 60.91           C  
ANISOU 1560  CG  LYS A  97     7310   8541   7290    220  -1847    194       C  
ATOM   1561  CD  LYS A  97       8.446  16.835  -0.920  1.00 78.58           C  
ANISOU 1561  CD  LYS A  97     9410  11029   9419    124  -2116    138       C  
ATOM   1562  CE  LYS A  97       9.052  18.103  -1.501  1.00 93.33           C  
ANISOU 1562  CE  LYS A  97    11209  12983  11270     37  -2400    121       C  
ATOM   1563  NZ  LYS A  97       8.346  19.334  -1.051  1.00104.40           N  
ANISOU 1563  NZ  LYS A  97    12706  14198  12763    -50  -2635     89       N  
ATOM   1564  N   ALA A  98       3.664  16.438  -2.549  1.00 18.09           N  
ANISOU 1564  N   ALA A  98     2485   2192   2197    431  -1066    167       N  
ATOM   1565  CA  ALA A  98       3.012  16.713  -3.818  1.00 24.22           C  
ANISOU 1565  CA  ALA A  98     3290   2992   2922    475  -1913    480       C  
ATOM   1566  C   ALA A  98       4.046  17.140  -4.837  1.00 26.43           C  
ANISOU 1566  C   ALA A  98     3718   3145   3179    143   -915   1037       C  
ATOM   1567  O   ALA A  98       5.059  17.737  -4.479  1.00 28.07           O  
ANISOU 1567  O   ALA A  98     4416   3315   2934   -274   -625   1300       O  
ATOM   1568  CB  ALA A  98       1.986  17.798  -3.623  1.00 29.98           C  
ANISOU 1568  CB  ALA A  98     3542   3883   3965   1001  -1663    681       C  
ATOM   1569  H   ALA A  98       3.484  17.014  -1.937  1.00 21.71           H  
ATOM   1570  HA  ALA A  98       2.562  15.906  -4.142  1.00 29.07           H  
ATOM   1571  HB1 ALA A  98       1.558  17.977  -4.463  1.00 35.97           H  
ATOM   1572  HB2 ALA A  98       1.337  17.502  -2.981  1.00 35.97           H  
ATOM   1573  HB3 ALA A  98       2.425  18.590  -3.304  1.00 35.97           H  
TER    1574      ALA A  98                                                      
HETATM 1575  S   SO4 A 100       7.422 -32.304  29.954  1.00 12.22           S  
ANISOU 1575  S   SO4 A 100     1731   1614   1296    623   -408    115       S  
HETATM 1576  O1  SO4 A 100       6.857 -30.996  29.748  1.00 14.38           O  
ANISOU 1576  O1  SO4 A 100     1854   1480   2131    498     90    566       O  
HETATM 1577  O2  SO4 A 100       7.262 -32.625  31.341  1.00 11.35           O  
ANISOU 1577  O2  SO4 A 100     1234   1755   1326    203   -609    179       O  
HETATM 1578  O3  SO4 A 100       6.730 -33.257  29.077  1.00 15.17           O  
ANISOU 1578  O3  SO4 A 100     2359   2012   1394   1086   -824   -615       O  
HETATM 1579  O4  SO4 A 100       8.853 -32.289  29.668  1.00 17.28           O  
ANISOU 1579  O4  SO4 A 100     1745   2174   2647    782   -351    638       O  
HETATM 1580  S   SO4 A 101      -6.184  -8.957   3.766  0.65 20.96           S  
ANISOU 1580  S   SO4 A 101     2732   2034   3200    -20   -376   -429       S  
HETATM 1581  O1  SO4 A 101      -5.159  -9.627   4.598  0.65 15.51           O  
ANISOU 1581  O1  SO4 A 101     2620   1695   1579    420    110    185       O  
HETATM 1582  O2  SO4 A 101      -7.331  -9.847   3.488  0.65 16.01           O  
ANISOU 1582  O2  SO4 A 101     2740   1679   1666   -699   -227    218       O  
HETATM 1583  O3  SO4 A 101      -6.633  -7.750   4.437  0.65 15.23           O  
ANISOU 1583  O3  SO4 A 101     2721   1795   1272    137   -281     -1       O  
HETATM 1584  O4  SO4 A 101      -5.586  -8.607   2.505  0.65 12.57           O  
ANISOU 1584  O4  SO4 A 101     1901   1768   1107    156     63    562       O  
HETATM 1585  O   HOH A 102      -2.665 -15.214  25.952  0.67 26.14           O  
ANISOU 1585  O   HOH A 102     5790   1761   2383  -1868   1769   -705       O  
HETATM 1586  O   HOH A 103       0.942  15.165   5.978  1.00 30.33           O  
ANISOU 1586  O   HOH A 103     2020   4015   5490    539   -511   -901       O  
HETATM 1587  O   HOH A 104      -8.594   0.811   3.059  0.42 15.52           O  
ANISOU 1587  O   HOH A 104     1988   2233   1676    453    493    391       O  
HETATM 1588  O   HOH A 105      10.105   5.092  15.994  0.53 18.79           O  
ANISOU 1588  O   HOH A 105     1672   3334   2133    310   -221    352       O  
HETATM 1589  O   HOH A 106      -3.721 -13.871  19.271  0.65 25.58           O  
ANISOU 1589  O   HOH A 106     1826   4426   3468    944    513  -1205       O  
HETATM 1590  O   HOH A 107      -7.832   9.231   2.886  0.33 15.03           O  
ANISOU 1590  O   HOH A 107     1696   2753   1263   -383   -396   -575       O  
HETATM 1591  O   HOH A 108      -1.330 -12.707  -1.156  0.53 18.78           O  
ANISOU 1591  O   HOH A 108     1784   2109   3242   -293    683   -618       O  
HETATM 1592  O   HOH A 109      -2.248  -8.414   5.845  0.63  9.82           O  
ANISOU 1592  O   HOH A 109     1680   1015   1035    274   -293   -104       O  
HETATM 1593  O   HOH A 110      11.750   9.325  12.681  0.70 21.96           O  
ANISOU 1593  O   HOH A 110     3169   1799   3373   -777   -393    441       O  
HETATM 1594  O   HOH A 111      -9.455  14.089  -4.001  0.73 29.44           O  
ANISOU 1594  O   HOH A 111     3990   3666   3529  -1585   -843   1692       O  
HETATM 1595  O   HOH A 112      -5.318   6.197  -5.064  0.73 24.89           O  
ANISOU 1595  O   HOH A 112     1733   4367   3357   -123   -771   2022       O  
HETATM 1596  O   HOH A 113      14.283 -16.937  21.602  0.76 23.71           O  
ANISOU 1596  O   HOH A 113     2045   2321   4643    180   -829   -823       O  
HETATM 1597  O   HOH A 114      -0.700  12.538 -11.939  0.95 30.97           O  
ANISOU 1597  O   HOH A 114     4512   2972   4282    282  -2469    299       O  
HETATM 1598  O   HOH A 115      -8.552   5.250   4.111  0.48 16.17           O  
ANISOU 1598  O   HOH A 115     1908   2130   2104   -423    163    121       O  
HETATM 1599  O   HOH A 116      -7.695   7.215   3.998  0.83 27.90           O  
ANISOU 1599  O   HOH A 116     1740   6339   2523    686   -729   -248       O  
HETATM 1600  O   HOH A 117      12.188 -22.874  15.845  0.91  8.45           O  
ANISOU 1600  O   HOH A 117     1140    832   1240    188   -136    -28       O  
HETATM 1601  O   HOH A 118      12.055  -1.050   1.946  0.45 10.32           O  
ANISOU 1601  O   HOH A 118     1213   1175   1534   -242   -103   -165       O  
HETATM 1602  O   HOH A 119      10.965  12.863  -5.914  0.85 35.66           O  
ANISOU 1602  O   HOH A 119     5158   5709   2681   -329   -353   1539       O  
HETATM 1603  O   HOH A 120      -3.647  -8.725  20.733  0.71  7.99           O  
ANISOU 1603  O   HOH A 120      869   1304    862   -256   -208    -26       O  
HETATM 1604  O   HOH A 121      -2.981  10.502  10.776  0.73 16.83           O  
ANISOU 1604  O   HOH A 121     1985   1895   2516   -812    473   -808       O  
HETATM 1605  O   HOH A 122      -3.913   7.937  -6.547  0.79 30.89           O  
ANISOU 1605  O   HOH A 122     2019   4632   5084   1164   -964    460       O  
HETATM 1606  O   HOH A 123     -10.537   8.496   6.408  0.50 12.80           O  
ANISOU 1606  O   HOH A 123      992   2135   1735    232   -253    537       O  
HETATM 1607  O   HOH A 124      -4.452 -10.908  19.232  0.99 29.12           O  
ANISOU 1607  O   HOH A 124     3311   3691   4062    -15    -35  -2393       O  
HETATM 1608  O   HOH A 125      -0.295 -14.533   5.798  0.51 19.79           O  
ANISOU 1608  O   HOH A 125     3900   2071   1547  -1447  -1395     30       O  
HETATM 1609  O   HOH A 126       8.056 -24.337  29.790  0.86 22.85           O  
ANISOU 1609  O   HOH A 126     3059   3139   2484   -517    429    180       O  
HETATM 1610  O   HOH A 127       8.427   5.788  -3.166  0.69 26.12           O  
ANISOU 1610  O   HOH A 127     1725   1895   6302   -203   -236  -2268       O  
HETATM 1611  O   HOH A 128      -7.283   5.313  -3.183  0.69 26.48           O  
ANISOU 1611  O   HOH A 128     2728   3720   3612   1874   -248   -824       O  
HETATM 1612  O   HOH A 129       6.383  11.033  -8.698  0.63 20.18           O  
ANISOU 1612  O   HOH A 129     3100   2537   2032   -568    344   -482       O  
HETATM 1613  O   HOH A 130      16.788  -9.623   7.074  1.00 25.51           O  
ANISOU 1613  O   HOH A 130     2865   4858   1971    191    494    -32       O  
HETATM 1614  O   HOH A 131      10.400 -14.818  22.110  0.70 20.81           O  
ANISOU 1614  O   HOH A 131     2101   1337   4469    229   -980   -687       O  
HETATM 1615  O   HOH A 132      11.055   4.304   3.995  0.64 18.34           O  
ANISOU 1615  O   HOH A 132     1777   1538   3655    126    -98    850       O  
HETATM 1616  O   HOH A 133       3.538  15.346   7.548  0.77 31.71           O  
ANISOU 1616  O   HOH A 133     5329   2819   3902   1394    982   -650       O  
HETATM 1617  O   HOH A 134       9.429  12.179  12.151  0.74 31.49           O  
ANISOU 1617  O   HOH A 134     3719   2729   5516  -1102   -900  -1630       O  
HETATM 1618  O   HOH A 135      -3.412 -15.231  15.096  1.00 37.75           O  
ANISOU 1618  O   HOH A 135     3296   4942   6104    305  -1961   -914       O  
HETATM 1619  O   HOH A 136       4.957  14.814  -7.697  1.00 36.16           O  
ANISOU 1619  O   HOH A 136     4985   4931   3825  -1970   -533   -326       O  
HETATM 1620  O   HOH A 137      -6.923 -12.330  13.031  1.00 35.42           O  
ANISOU 1620  O   HOH A 137     3476   4305   5676   1897  -1871  -2202       O  
HETATM 1621  O   HOH A 138      -2.147 -11.710  -3.101  1.00 36.32           O  
ANISOU 1621  O   HOH A 138     2375   4715   6709   -892  -1404    286       O  
HETATM 1622  O   HOH A 139       6.936 -22.934  13.640  1.00 34.21           O  
ANISOU 1622  O   HOH A 139     4655   5509   2835   2860  -1303  -1362       O  
HETATM 1623  O   HOH A 140       0.689  15.303  -9.516  1.00 40.90           O  
ANISOU 1623  O   HOH A 140     4951   4736   5854   1255  -1758    624       O  
HETATM 1624  O   HOH A 141      -0.416  -6.061  19.767  1.00 10.30           O  
ANISOU 1624  O   HOH A 141     1227   1003   1682    135   -135   -125       O  
HETATM 1625  O   HOH A 142      -0.289 -17.415   6.221  1.00 37.80           O  
ANISOU 1625  O   HOH A 142     5680   4322   4360   1313  -2828  -1581       O  
HETATM 1626  O   HOH A 143      -8.159  -1.146  -1.281  1.00 16.27           O  
ANISOU 1626  O   HOH A 143     1759   2552   1870    834    102    392       O  
HETATM 1627  O   HOH A 144      -3.904 -21.792  15.139  1.00 25.92           O  
ANISOU 1627  O   HOH A 144     2107   3714   4026  -1368   -833   1123       O  
HETATM 1628  O   HOH A 145      -6.087   6.136  -0.295  1.00 30.00           O  
ANISOU 1628  O   HOH A 145     1800   3710   5889    766   -471    -52       O  
HETATM 1629  O   HOH A 146       0.637  -8.768  -5.938  1.00 32.51           O  
ANISOU 1629  O   HOH A 146     2012   4375   5965   -456   -986    568       O  
HETATM 1630  O   HOH A 147     -10.839   1.401  -0.171  1.00 36.62           O  
ANISOU 1630  O   HOH A 147     3278   3333   7303  -1566    576   1312       O  
HETATM 1631  O   HOH A 148      -0.695 -15.077  -0.039  1.00 38.17           O  
ANISOU 1631  O   HOH A 148     4610   4073   5819  -1732  -1706   -818       O  
HETATM 1632  O   HOH A 149       0.273  -0.575  -9.595  1.00 24.94           O  
ANISOU 1632  O   HOH A 149     2744   5141   1593  -2365  -1175   1228       O  
HETATM 1633  O   HOH A 150      -0.958   1.209  -9.416  1.00 20.64           O  
ANISOU 1633  O   HOH A 150     2953   2657   2234   -790  -1738    823       O  
HETATM 1634  O   HOH A 151      -3.033 -11.726   8.531  1.00 37.80           O  
ANISOU 1634  O   HOH A 151     4644   3025   6695  -1828  -1492   -620       O  
HETATM 1635  O   HOH A 152      10.685  -4.552  -0.884  1.00  9.21           O  
ANISOU 1635  O   HOH A 152      931   1372   1195     39   -302   -198       O  
HETATM 1636  O   HOH A 153     -11.008  -7.012  -1.407  1.00  8.75           O  
ANISOU 1636  O   HOH A 153     1002   1254   1069   -246   -184    -31       O  
HETATM 1637  O   HOH A 154      10.753 -14.720  18.244  1.00 27.01           O  
ANISOU 1637  O   HOH A 154     3088   2974   4202    942   -228    658       O  
HETATM 1638  O   HOH A 155      12.438 -11.581  11.224  1.00 39.02           O  
ANISOU 1638  O   HOH A 155     4541   4563   5720    323  -1715    198       O  
HETATM 1639  O   HOH A 156       8.618   9.636  -8.222  1.00 39.85           O  
ANISOU 1639  O   HOH A 156     5683   4506   4951     77   -786    -54       O  
HETATM 1640  O   HOH A 157       5.770  11.429  14.133  1.00 43.13           O  
ANISOU 1640  O   HOH A 157     5716   4709   5961   -311  -1229   -106       O  
HETATM 1641  O   HOH A 158      -8.117 -10.725  10.694  1.00 44.33           O  
ANISOU 1641  O   HOH A 158     6057   3992   6795    260  -1946      0       O  
HETATM 1642  O   HOH A 159      13.162 -14.947  19.626  1.00 43.00           O  
ANISOU 1642  O   HOH A 159     5612   4275   6452   -298  -1853    502       O  
HETATM 1643  O   HOH A 160       1.499  12.909   7.186  1.00 29.92           O  
HETATM 1644  O   HOH A 161      11.199 -18.013   1.866  1.00 29.85           O  
HETATM 1645  O   HOH A 162       2.442  -7.775   5.362  0.93  6.46           O  
ANISOU 1645  O   HOH A 162      871    856    729    134   -228    -62       O  
HETATM 1646  O   HOH A 163      11.089  -0.677   8.493  0.89  5.48           O  
ANISOU 1646  O   HOH A 163      498    847    737   -166   -286   -107       O  
HETATM 1647  O   HOH A 164      -9.381  -6.240  -3.580  0.89  6.48           O  
ANISOU 1647  O   HOH A 164      720   1084    659   -297   -358     70       O  
HETATM 1648  O   HOH A 165      -5.963  -2.614  -2.169  0.86  6.60           O  
ANISOU 1648  O   HOH A 165      692    891    926   -230   -326     55       O  
HETATM 1649  O   HOH A 166      -1.472 -13.204  24.441  0.93  7.03           O  
ANISOU 1649  O   HOH A 166     1171    611    891    -14   -357   -168       O  
HETATM 1650  O   HOH A 167      -3.349   2.840  11.642  1.00  7.96           O  
ANISOU 1650  O   HOH A 167      947    864   1215    -36   -422      1       O  
HETATM 1651  O   HOH A 168      12.516  -3.222  -3.061  0.74  5.77           O  
ANISOU 1651  O   HOH A 168      789    682    721    205   -279     -6       O  
HETATM 1652  O   HOH A 169       3.852  -6.646  -1.236  0.87  7.74           O  
ANISOU 1652  O   HOH A 169      960    760   1222   -131    -71      7       O  
HETATM 1653  O   HOH A 170       7.914  -4.388  -1.219  0.87  6.45           O  
ANISOU 1653  O   HOH A 170      719    849    884    137   -173    -42       O  
HETATM 1654  O   HOH A 171      16.117  -4.512   8.869  0.81  7.75           O  
ANISOU 1654  O   HOH A 171      841    743   1360   -219   -299     53       O  
HETATM 1655  O   HOH A 172      -1.303  -8.280  -7.104  0.97  8.79           O  
ANISOU 1655  O   HOH A 172      925   1344   1070    -69   -485   -205       O  
HETATM 1656  O   HOH A 173       0.254  -9.442   4.935  0.88  8.64           O  
ANISOU 1656  O   HOH A 173     1330    927   1027   -170   -395    110       O  
HETATM 1657  O   HOH A 174       6.792 -24.788  19.835  1.00 10.34           O  
ANISOU 1657  O   HOH A 174      865   1431   1633   -257      0   -484       O  
HETATM 1658  O   HOH A 175       9.843   0.188   6.179  0.93  8.23           O  
ANISOU 1658  O   HOH A 175     1166    756   1205   -251   -782     17       O  
HETATM 1659  O   HOH A 176      14.250  -8.421  18.108  0.93 10.13           O  
ANISOU 1659  O   HOH A 176     1195   1826    826     37   -561     15       O  
HETATM 1660  O   HOH A 177      -9.284  -0.560  13.865  0.98  8.48           O  
ANISOU 1660  O   HOH A 177     1119   1120    981   -492   -327    -28       O  
HETATM 1661  O   HOH A 178      -2.254  -1.527  -9.047  0.88  9.66           O  
ANISOU 1661  O   HOH A 178      968   1865    838   -253   -324    101       O  
HETATM 1662  O   HOH A 179      -3.855  -6.055   6.455  0.93 10.58           O  
ANISOU 1662  O   HOH A 179     1841   1027   1153   -126   -675   -170       O  
HETATM 1663  O   HOH A 180       1.878  -6.732  22.773  0.67  7.01           O  
ANISOU 1663  O   HOH A 180      902   1032    730     45   -242   -165       O  
HETATM 1664  O   HOH A 181       2.892   0.386  16.660  0.74  7.03           O  
ANISOU 1664  O   HOH A 181      972    640   1061     11    -86     78       O  
HETATM 1665  O   HOH A 182      -3.042   2.325  14.806  0.98 12.37           O  
ANISOU 1665  O   HOH A 182      813   1566   2322   -221    175   -984       O  
HETATM 1666  O   HOH A 183      -3.525   4.751   1.826  0.85  9.63           O  
ANISOU 1666  O   HOH A 183     1053   1194   1410   -248   -399   -178       O  
HETATM 1667  O   HOH A 184       9.988 -18.597  19.709  0.73  8.51           O  
ANISOU 1667  O   HOH A 184     1111    487   1636     82   -166     49       O  
HETATM 1668  O   HOH A 185       7.693  -3.011   1.055  0.93 10.97           O  
ANISOU 1668  O   HOH A 185     2021    984   1165    104    321    -14       O  
HETATM 1669  O   HOH A 186      16.791  -3.826  13.559  0.73  8.98           O  
ANISOU 1669  O   HOH A 186      914    897   1600   -158   -189    204       O  
HETATM 1670  O   HOH A 187      -1.726 -10.551   0.423  0.76  9.88           O  
ANISOU 1670  O   HOH A 187     1333   1048   1375   -350   -492    305       O  
HETATM 1671  O   HOH A 188      -8.738  -7.676  -0.126  0.76 11.35           O  
ANISOU 1671  O   HOH A 188      909   2265   1138   -571   -408    574       O  
HETATM 1672  O   HOH A 189       0.288 -10.968   2.527  0.70  8.23           O  
ANISOU 1672  O   HOH A 189     1317    859    950    -37   -446     43       O  
HETATM 1673  O   HOH A 190       8.620 -14.628  19.837  0.74 10.07           O  
ANISOU 1673  O   HOH A 190     1171    912   1743    175     -9    147       O  
HETATM 1674  O   HOH A 191      -3.170  -3.334  12.717  1.00 15.53           O  
ANISOU 1674  O   HOH A 191     1602   1929   2370    653   -961   -858       O  
HETATM 1675  O   HOH A 192       9.739   7.330  13.174  0.85 12.45           O  
ANISOU 1675  O   HOH A 192     1561   1802   1367    334   -516   -379       O  
HETATM 1676  O   HOH A 193       8.858   2.722   7.697  0.91 11.51           O  
ANISOU 1676  O   HOH A 193     1991   1518    866   -246   -222     48       O  
HETATM 1677  O   HOH A 194       9.825 -22.129  16.984  0.79 13.50           O  
ANISOU 1677  O   HOH A 194     1438   2600   1092   1142   -261   -106       O  
HETATM 1678  O   HOH A 195       1.310 -11.898  -0.980  0.66  8.36           O  
ANISOU 1678  O   HOH A 195     1126    925   1124     91   -433   -321       O  
HETATM 1679  O   HOH A 196      -8.139  -1.991  -5.430  1.00 17.63           O  
ANISOU 1679  O   HOH A 196     2162   2877   1659   1464   -747   -405       O  
HETATM 1680  O   HOH A 197      10.356  -3.002   1.419  0.73 10.79           O  
ANISOU 1680  O   HOH A 197     1611   1206   1284     12   -390   -162       O  
HETATM 1681  O   HOH A 198      -0.622 -18.703  15.189  1.00 17.23           O  
ANISOU 1681  O   HOH A 198     2355   1893   2296   -256    384   -606       O  
HETATM 1682  O   HOH A 199       7.155 -11.020  24.417  0.64 10.12           O  
ANISOU 1682  O   HOH A 199     1585    948   1311     97   -391    -89       O  
HETATM 1683  O   HOH A 200     -10.665   0.051   4.497  0.75 12.10           O  
ANISOU 1683  O   HOH A 200     1353   1890   1355    195   -657    -66       O  
HETATM 1684  O   HOH A 201       1.267  14.479   3.660  0.56 12.77           O  
ANISOU 1684  O   HOH A 201     1122   1623   2107    347   -237   -399       O  
HETATM 1685  O   HOH A 202       9.376 -25.508  27.546  0.79 12.48           O  
ANISOU 1685  O   HOH A 202     1421   1339   1983   -481    154   -225       O  
HETATM 1686  O   HOH A 203       8.912   4.020   0.001  1.00 14.84           O  
ANISOU 1686  O   HOH A 203     1364   1270   3004   -641   -751    262       O  
HETATM 1687  O   HOH A 204       7.539 -13.455  23.181  0.68 10.77           O  
ANISOU 1687  O   HOH A 204     1586   1479   1026   -178   -733    160       O  
HETATM 1688  O   HOH A 205       4.832 -21.672  12.402  0.69 12.87           O  
ANISOU 1688  O   HOH A 205     2218    904   1767    234   -477   -691       O  
HETATM 1689  O   HOH A 206      -7.106   3.760  -0.292  0.66 17.93           O  
ANISOU 1689  O   HOH A 206     1504   2506   2803    916   -399   -427       O  
HETATM 1690  O   HOH A 207      -8.109  -1.780   1.527  0.81 16.08           O  
ANISOU 1690  O   HOH A 207      999   2797   2314    574    268   1076       O  
HETATM 1691  O   HOH A 208      -2.965   1.786  -7.312  0.50 10.16           O  
ANISOU 1691  O   HOH A 208      898   1499   1464   -181   -537    182       O  
HETATM 1692  O   HOH A 209      11.615 -11.380   3.435  0.57 13.03           O  
ANISOU 1692  O   HOH A 209     1656   1772   1525    598   -113   -265       O  
HETATM 1693  O   HOH A 210       8.269   6.216  -8.907  0.56 12.44           O  
ANISOU 1693  O   HOH A 210     1267   1321   2141   -278   -100    117       O  
HETATM 1694  O   HOH A 211       3.596 -15.159   7.693  0.58 12.12           O  
ANISOU 1694  O   HOH A 211     2540   1174    891    549   -208     35       O  
HETATM 1695  O   HOH A 212      -5.035   8.397  12.632  0.64 14.55           O  
ANISOU 1695  O   HOH A 212     1356   1903   2269   -349    155   -658       O  
HETATM 1696  O   HOH A 213      -9.124   6.699   9.249  0.51 12.00           O  
ANISOU 1696  O   HOH A 213      701   1890   1968   -356   -490    950       O  
HETATM 1697  O   HOH A 214      -1.533   9.789  -7.812  0.76 19.52           O  
ANISOU 1697  O   HOH A 214     3538   2412   1466   1013  -1051   -127       O  
HETATM 1698  O   HOH A 215       9.195   1.649  15.062  0.83 17.71           O  
ANISOU 1698  O   HOH A 215     2473   3244   1012   -648   -466    502       O  
HETATM 1699  O   HOH A 216      -3.617 -19.724  21.806  0.40  9.50           O  
ANISOU 1699  O   HOH A 216     1169   1249   1194   -510   -122     58       O  
HETATM 1700  O   HOH A 217      -1.968 -21.574  16.284  1.00 28.08           O  
ANISOU 1700  O   HOH A 217     3681   1490   5499   -940   2037  -1648       O  
HETATM 1701  O   HOH A 218      10.484 -17.324  17.384  0.74 16.51           O  
ANISOU 1701  O   HOH A 218     3204   1288   1784   -147   -125    137       O  
HETATM 1702  O   HOH A 219      -1.500  13.857  -4.719  0.84 22.27           O  
ANISOU 1702  O   HOH A 219     3607   2274   2582   1111    264   1052       O  
HETATM 1703  O   HOH A 220       8.251 -14.358  11.647  0.82 18.19           O  
ANISOU 1703  O   HOH A 220     2532   1701   2681   -776    212   -491       O  
HETATM 1704  O   HOH A 221      -1.661 -15.414  12.536  0.69 14.93           O  
ANISOU 1704  O   HOH A 221     2180   2051   1440   -635   -376   -189       O  
HETATM 1705  O   HOH A 222      12.944   3.254  16.688  0.77 12.97           O  
ANISOU 1705  O   HOH A 222     1590   1973   1366    204   -660   -224       O  
HETATM 1706  O   HOH A 223      -5.610  10.705   5.267  0.46 10.82           O  
ANISOU 1706  O   HOH A 223     1257   1467   1387    252   -455   -210       O  
HETATM 1707  O   HOH A 224      -4.649  10.833   7.869  0.55 12.50           O  
ANISOU 1707  O   HOH A 224     1702   1027   2020    404    345    235       O  
HETATM 1708  O   HOH A 225       7.373 -18.111   1.485  0.68 18.32           O  
ANISOU 1708  O   HOH A 225     1763   1737   3462    284      1     30       O  
HETATM 1709  O   HOH A 226       8.049   4.562  -6.589  0.65 15.92           O  
ANISOU 1709  O   HOH A 226     1231   3097   1722   -783     40   -543       O  
HETATM 1710  O   HOH A 227       3.619 -23.316  19.149  0.66 19.13           O  
ANISOU 1710  O   HOH A 227     2889   2228   2153   -729    165  -1037       O  
HETATM 1711  O   HOH A 228       3.549  18.438  -0.401  0.67 23.20           O  
ANISOU 1711  O   HOH A 228     4746   1619   2449   1814  -1618   -489       O  
HETATM 1712  O   HOH A 229       8.039  -0.988  16.468  0.80 16.71           O  
ANISOU 1712  O   HOH A 229     2860   2198   1293    980  -1052   -582       O  
HETATM 1713  O   HOH A 230      -0.062 -21.011  20.343  0.76 22.49           O  
ANISOU 1713  O   HOH A 230     1129   4625   2793   -821   -581   2560       O  
HETATM 1714  O   HOH A 231       0.295 -17.272  13.008  0.40  9.42           O  
ANISOU 1714  O   HOH A 231     1029   1033   1517   -143    -46    -73       O  
HETATM 1715  O   HOH A 232       9.193   2.826  -3.152  0.40 10.88           O  
ANISOU 1715  O   HOH A 232     1511   1636    989    128   -366   -170       O  
HETATM 1716  O   HOH A 233       5.910 -16.044   1.157  0.72 17.01           O  
ANISOU 1716  O   HOH A 233     3648   1364   1452   1086  -1287   -511       O  
HETATM 1717  O   HOH A 234       9.266 -16.312  13.147  0.96 30.37           O  
ANISOU 1717  O   HOH A 234     5795    928   4816   -176   2583   -362       O  
HETATM 1718  O   HOH A 235       6.972 -13.496   7.252  0.62 15.43           O  
ANISOU 1718  O   HOH A 235     3023   1443   1396    320   -765    -60       O  
HETATM 1719  O   HOH A 236       4.306 -32.459  28.049  0.69 21.63           O  
ANISOU 1719  O   HOH A 236     1647   4907   1664    675   -605     38       O  
HETATM 1720  O   HOH A 237      -6.080 -11.473  -0.394  0.60 16.50           O  
ANISOU 1720  O   HOH A 237     2618   1486   2165    -78   -787   -123       O  
HETATM 1721  O   HOH A 238       6.465   6.902  14.471  0.35 10.51           O  
ANISOU 1721  O   HOH A 238     1417   1581    994   -242   -502   -127       O  
HETATM 1722  O   HOH A 239       4.039 -26.379  27.083  0.41 11.48           O  
ANISOU 1722  O   HOH A 239     1530   1134   1699   -376    -26    237       O  
HETATM 1723  O   HOH A 240      -7.276   9.959  -4.389  0.36 13.16           O  
ANISOU 1723  O   HOH A 240     1178   2132   1692    123    133    -31       O  
HETATM 1724  O   HOH A 241      -8.558   1.580  -1.616  0.46 12.53           O  
ANISOU 1724  O   HOH A 241     1216   1718   1829   -220   -426    -24       O  
HETATM 1725  O   HOH A 242      -4.162 -10.691   1.690  0.56 13.72           O  
ANISOU 1725  O   HOH A 242     1802   1083   2327    -36    720    175       O  
HETATM 1726  O   HOH A 243      -5.222   7.406  -2.094  0.50 13.61           O  
ANISOU 1726  O   HOH A 243      781   1915   2475    491    -28    678       O  
HETATM 1727  O   HOH A 244       7.867   4.217  14.847  0.34  9.80           O  
ANISOU 1727  O   HOH A 244      789   1904   1031   -289   -379   -345       O  
HETATM 1728  O   HOH A 245      10.246   3.117   2.310  0.71 25.06           O  
ANISOU 1728  O   HOH A 245     1992   1703   5827   -951  -1781    989       O  
HETATM 1729  O   HOH A 246       2.050 -19.137  10.285  0.78 28.76           O  
ANISOU 1729  O   HOH A 246     3250   2977   4699   -587   -433  -2210       O  
HETATM 1730  O   HOH A 247      -8.000   8.122   7.129  0.57 16.89           O  
ANISOU 1730  O   HOH A 247     1708   2408   2301    122    161    693       O  
HETATM 1731  O   HOH A 248      -9.748  -9.670   5.166  0.70 18.20           O  
ANISOU 1731  O   HOH A 248     2629   2605   1679   -235   -238    262       O  
HETATM 1732  O   HOH A 249      13.678 -11.128  18.159  0.78 24.91           O  
ANISOU 1732  O   HOH A 249     4122   1625   3716   -548   -250    251       O  
HETATM 1733  O   HOH A 250      -8.201 -10.103   0.797  0.67 17.71           O  
ANISOU 1733  O   HOH A 250     2789   2082   1857  -1258   -798    696       O  
HETATM 1734  O   HOH A 251      12.079   8.579  10.212  0.51 14.30           O  
ANISOU 1734  O   HOH A 251     1186   1213   3033   -410  -1130   1087       O  
HETATM 1735  O   HOH A 252      -7.357   3.333   3.381  0.52 16.45           O  
ANISOU 1735  O   HOH A 252     2288   1522   2440    195    761    651       O  
HETATM 1736  O   HOH A 253       4.734 -23.482  14.310  0.48 16.02           O  
ANISOU 1736  O   HOH A 253     2544   1191   2351    443   -545   -122       O  
HETATM 1737  O   HOH A 254      13.129 -12.290  20.923  0.90 31.04           O  
ANISOU 1737  O   HOH A 254     4202   2435   5155    134  -2566   -558       O  
HETATM 1738  O   HOH A 255      -1.494  12.722  -7.198  0.75 29.01           O  
ANISOU 1738  O   HOH A 255     4391   4085   2547   1233    259   1223       O  
HETATM 1739  O   HOH A 256      11.593   0.282  15.918  0.74 14.78           O  
ANISOU 1739  O   HOH A 256     2206   2068   1342    352   -274    469       O  
HETATM 1740  O   HOH A 257      11.539 -17.377  21.535  0.64 14.11           O  
ANISOU 1740  O   HOH A 257     1879   1356   2126    306  -1009   -497       O  
HETATM 1741  O   HOH A 258      -7.798  13.441  -1.743  0.76 20.14           O  
ANISOU 1741  O   HOH A 258     2011   2929   2713   -582    459    603       O  
HETATM 1742  O   HOH A 259      -0.174 -13.574   3.245  0.73 20.27           O  
ANISOU 1742  O   HOH A 259     4559   1532   1611  -1457   -225     74       O  
HETATM 1743  O   HOH A 260       5.782 -15.466   6.195  0.60 19.32           O  
ANISOU 1743  O   HOH A 260     2807   1713   2820    698   -118    633       O  
HETATM 1744  O   HOH A 261      10.288 -19.431  15.541  0.74 25.45           O  
ANISOU 1744  O   HOH A 261     4398   1629   3644    206   1013    757       O  
CONECT 1575 1576 1577 1578 1579                                                 
CONECT 1576 1575                                                                
CONECT 1577 1575                                                                
CONECT 1578 1575                                                                
CONECT 1579 1575                                                                
CONECT 1580 1581 1582 1583 1584                                                 
CONECT 1581 1580                                                                
CONECT 1582 1580                                                                
CONECT 1583 1580                                                                
CONECT 1584 1580                                                                
MASTER      230    0    2    1    9    0    4    6  876    1   10    8          
END                                                                             
