# Supplementary material
Source: publisher figshare collection journal article supplement (https://plos.figshare.com/articles/dataset/_/11411415)
Supplement: Supplementary file 1 [file 1 › pone.0226693.s022.pdb]

REMARK Modified from 3Q5O (titin M10)
REMARK sequence renumbered: original residue number +1
CRYST1  118.770  118.770   85.220  90.00  90.00 120.00 P 63 2 2     24          
ORIGX1      1.000000  0.000000  0.000000        0.00000                         
ORIGX2      0.000000  1.000000  0.000000        0.00000                         
ORIGX3      0.000000  0.000000  1.000000        0.00000                         
SCALE1      0.008420  0.004861  0.000000        0.00000                         
SCALE2      0.000000  0.009722  0.000000        0.00000                         
SCALE3      0.000000  0.000000  0.011734        0.00000  
ATOM      1  N   GLY A   2      28.235 -11.120  29.222  1.00 47.71           N  
ANISOU    1  N   GLY A   2     7558   5091   5477  -1066    335  -1371       N  
ATOM      2  CA  GLY A   2      29.593 -11.504  29.550  1.00 46.27           C  
ANISOU    2  CA  GLY A   2     7274   5036   5272  -1211    184  -1463       C  
ATOM      3  C   GLY A   2      30.274 -12.149  28.364  1.00 43.92           C  
ANISOU    3  C   GLY A   2     6755   4824   5110  -1266    120  -1440       C  
ATOM      4  O   GLY A   2      29.705 -12.193  27.274  1.00 45.40           O  
ANISOU    4  O   GLY A   2     6896   4961   5394  -1209    195  -1363       O  
ATOM      5  N   PRO A   3      31.497 -12.657  28.568  1.00 41.74           N  
ANISOU    5  N   PRO A   3     6341   4677   4840  -1376    -16  -1502       N  
ATOM      6  CA  PRO A   3      32.299 -13.206  27.464  1.00 42.52           C  
ANISOU    6  CA  PRO A   3     6234   4851   5070  -1445    -65  -1496       C  
ATOM      7  C   PRO A   3      31.826 -14.569  26.971  1.00 45.19           C  
ANISOU    7  C   PRO A   3     6399   5270   5502  -1308    -79  -1375       C  
ATOM      8  O   PRO A   3      32.050 -14.894  25.813  1.00 53.80           O  
ANISOU    8  O   PRO A   3     7370   6368   6703  -1333    -59  -1345       O  
ATOM      9  CB  PRO A   3      33.691 -13.342  28.079  1.00 43.23           C  
ANISOU    9  CB  PRO A   3     6234   5063   5128  -1586   -207  -1592       C  
ATOM     10  CG  PRO A   3      33.435 -13.484  29.565  1.00 41.24           C  
ANISOU   10  CG  PRO A   3     6084   4850   4736  -1533   -267  -1602       C  
ATOM     11  CD  PRO A   3      32.237 -12.628  29.844  1.00 42.42           C  
ANISOU   11  CD  PRO A   3     6469   4841   4807  -1456   -128  -1587       C  
ATOM     12  N   GLY A   4      31.178 -15.343  27.834  1.00 41.88           N  
ANISOU   12  N   GLY A   4     5980   4901   5031  -1175   -104  -1309       N  
ATOM     13  CA  GLY A   4      30.836 -16.718  27.525  1.00 37.09           C  
ANISOU   13  CA  GLY A   4     5213   4380   4500  -1059   -127  -1204       C  
ATOM     14  C   GLY A   4      31.732 -17.679  28.288  1.00 38.25           C  
ANISOU   14  C   GLY A   4     5230   4672   4629  -1067   -263  -1218       C  
ATOM     15  O   GLY A   4      32.865 -17.343  28.638  1.00 38.75           O  
ANISOU   15  O   GLY A   4     5264   4791   4668  -1192   -353  -1309       O  
ATOM     16  N   ILE A   5      31.210 -18.871  28.559  1.00 36.59           N  
ANISOU   16  N   ILE A   5     4945   4526   4433   -934   -280  -1124       N  
ATOM     17  CA  ILE A   5      31.940 -19.914  29.269  1.00 34.28           C  
ANISOU   17  CA  ILE A   5     4529   4367   4128   -910   -402  -1112       C  
ATOM     18  C   ILE A   5      31.591 -21.238  28.617  1.00 34.02           C  
ANISOU   18  C   ILE A   5     4352   4377   4196   -806   -380  -1007       C  
ATOM     19  O   ILE A   5      30.415 -21.534  28.442  1.00 34.67           O  
ANISOU   19  O   ILE A   5     4485   4408   4282   -701   -294   -927       O  
ATOM     20  CB  ILE A   5      31.494 -20.016  30.749  1.00 33.72           C  
ANISOU   20  CB  ILE A   5     4582   4316   3913   -835   -441  -1104       C  
ATOM     21  CG1 ILE A   5      31.595 -18.667  31.460  1.00 37.08           C  
ANISOU   21  CG1 ILE A   5     5199   4673   4217   -929   -436  -1204       C  
ATOM     22  CG2 ILE A   5      32.311 -21.074  31.489  1.00 36.74           C  
ANISOU   22  CG2 ILE A   5     4840   4840   4278   -811   -580  -1085       C  
ATOM     23  CD1 ILE A   5      31.102 -18.703  32.914  1.00 38.19           C  
ANISOU   23  CD1 ILE A   5     5491   4818   4201   -862   -457  -1201       C  
ATOM     24  N   PRO A   6      32.603 -22.045  28.264  1.00 36.18           N  
ANISOU   24  N   PRO A   6     4448   4744   4554   -836   -451  -1006       N  
ATOM     25  CA  PRO A   6      32.347 -23.380  27.712  1.00 33.50           C  
ANISOU   25  CA  PRO A   6     3984   4441   4302   -741   -425   -910       C  
ATOM     26  C   PRO A   6      31.625 -24.234  28.749  1.00 33.09           C  
ANISOU   26  C   PRO A   6     3974   4425   4173   -601   -445   -834       C  
ATOM     27  O   PRO A   6      31.789 -23.984  29.935  1.00 33.64           O  
ANISOU   27  O   PRO A   6     4120   4530   4133   -593   -517   -864       O  
ATOM     28  CB  PRO A   6      33.750 -23.937  27.475  1.00 34.26           C  
ANISOU   28  CB  PRO A   6     3900   4636   4483   -800   -509   -938       C  
ATOM     29  CG  PRO A   6      34.655 -22.758  27.494  1.00 35.01           C  
ANISOU   29  CG  PRO A   6     4010   4729   4563   -951   -555  -1050       C  
ATOM     30  CD  PRO A   6      34.041 -21.782  28.427  1.00 37.09           C  
ANISOU   30  CD  PRO A   6     4468   4938   4685   -958   -557  -1090       C  
ATOM     31  N   PRO A   7      30.850 -25.240  28.312  1.00 30.81           N  
ANISOU   31  N   PRO A   7     3646   4127   3935   -502   -380   -738       N  
ATOM     32  CA  PRO A   7      30.086 -26.048  29.269  1.00 26.87           C  
ANISOU   32  CA  PRO A   7     3197   3652   3362   -373   -382   -664       C  
ATOM     33  C   PRO A   7      31.004 -26.971  30.046  1.00 31.52           C  
ANISOU   33  C   PRO A   7     3694   4348   3936   -336   -494   -651       C  
ATOM     34  O   PRO A   7      31.985 -27.476  29.499  1.00 31.52           O  
ANISOU   34  O   PRO A   7     3546   4400   4028   -370   -535   -657       O  
ATOM     35  CB  PRO A   7      29.174 -26.899  28.371  1.00 25.82           C  
ANISOU   35  CB  PRO A   7     3021   3483   3306   -308   -284   -572       C  
ATOM     36  CG  PRO A   7      29.322 -26.302  26.952  1.00 24.15           C  
ANISOU   36  CG  PRO A   7     2771   3215   3190   -409   -226   -602       C  
ATOM     37  CD  PRO A   7      30.697 -25.727  26.932  1.00 27.59           C  
ANISOU   37  CD  PRO A   7     3148   3688   3646   -516   -304   -697       C  
ATOM     38  N   LYS A   8      30.679 -27.213  31.308  1.00 31.72           N  
ANISOU   38  N   LYS A   8     3807   4402   3845   -260   -538   -626       N  
ATOM     39  CA  LYS A   8      31.450 -28.161  32.095  1.00 37.03           C  
ANISOU   39  CA  LYS A   8     4401   5176   4493   -206   -647   -595       C  
ATOM     40  C   LYS A   8      30.539 -28.890  33.060  1.00 38.04           C  
ANISOU   40  C   LYS A   8     4627   5301   4525    -79   -625   -517       C  
ATOM     41  O   LYS A   8      29.909 -28.275  33.911  1.00 40.66           O  
ANISOU   41  O   LYS A   8     5114   5598   4736    -67   -612   -536       O  
ATOM     42  CB  LYS A   8      32.576 -27.449  32.846  1.00 46.02           C  
ANISOU   42  CB  LYS A   8     5537   6385   5563   -297   -785   -678       C  
ATOM     43  CG  LYS A   8      33.314 -28.334  33.842  1.00 57.61           C  
ANISOU   43  CG  LYS A   8     6942   7966   6982   -236   -917   -636       C  
ATOM     44  CD  LYS A   8      33.749 -29.639  33.190  1.00 67.91           C  
ANISOU   44  CD  LYS A   8     8069   9314   8419   -161   -909   -558       C  
ATOM     45  CE  LYS A   8      34.539 -30.525  34.154  1.00 76.08           C  
ANISOU   45  CE  LYS A   8     9031  10461   9414    -88  -1043   -504       C  
ATOM     46  NZ  LYS A   8      34.848 -31.855  33.543  1.00 77.65           N1+
ANISOU   46  NZ  LYS A   8     9079  10682   9742      5  -1008   -417       N1+
ATOM     47  N   ILE A   9      30.448 -30.202  32.891  1.00 35.79           N  
ANISOU   47  N   ILE A   9     4260   5042   4295     12   -607   -431       N  
ATOM     48  CA  ILE A   9      29.741 -31.043  33.829  1.00 35.78           C  
ANISOU   48  CA  ILE A   9     4339   5048   4208    131   -593   -353       C  
ATOM     49  C   ILE A   9      30.558 -31.024  35.130  1.00 42.56           C  
ANISOU   49  C   ILE A   9     5229   5991   4950    140   -739   -371       C  
ATOM     50  O   ILE A   9      31.710 -31.467  35.160  1.00 40.93           O  
ANISOU   50  O   ILE A   9     4895   5869   4787    132   -846   -368       O  
ATOM     51  CB  ILE A   9      29.602 -32.477  33.280  1.00 37.01           C  
ANISOU   51  CB  ILE A   9     4397   5208   4455    214   -540   -260       C  
ATOM     52  CG1 ILE A   9      28.746 -32.478  32.006  1.00 34.52           C  
ANISOU   52  CG1 ILE A   9     4064   4815   4238    187   -405   -242       C  
ATOM     53  CG2 ILE A   9      29.010 -33.407  34.342  1.00 41.82           C  
ANISOU   53  CG2 ILE A   9     5090   5829   4969    335   -534   -179       C  
ATOM     54  CD1 ILE A   9      28.720 -33.811  31.253  1.00 31.06           C  
ANISOU   54  CD1 ILE A   9     3531   4372   3899    234   -344   -168       C  
ATOM     55  N   GLU A  10      29.992 -30.459  36.192  1.00 44.23           N  
ANISOU   55  N   GLU A  10     5612   6181   5013    151   -744   -392       N  
ATOM     56  CA  GLU A  10      30.773 -30.286  37.410  1.00 45.04           C  
ANISOU   56  CA  GLU A  10     5765   6362   4986    134   -892   -420       C  
ATOM     57  C   GLU A  10      31.263 -31.644  37.893  1.00 50.59           C  
ANISOU   57  C   GLU A  10     6386   7146   5689    237   -971   -328       C  
ATOM     58  O   GLU A  10      32.447 -31.806  38.222  1.00 53.57           O  
ANISOU   58  O   GLU A  10     6665   7625   6065    212  -1119   -335       O  
ATOM     59  CB  GLU A  10      29.980 -29.575  38.501  1.00 41.00           C  
ANISOU   59  CB  GLU A  10     5476   5800   4302    137   -862   -450       C  
ATOM     60  CG  GLU A  10      30.821 -29.293  39.748  1.00 48.80           C  
ANISOU   60  CG  GLU A  10     6536   6869   5135     93  -1025   -490       C  
ATOM     61  CD  GLU A  10      30.043 -28.573  40.839  1.00 56.21           C  
ANISOU   61  CD  GLU A  10     7721   7746   5892     88   -981   -526       C  
ATOM     62  OE1 GLU A  10      29.163 -29.207  41.457  1.00 59.07           O  
ANISOU   62  OE1 GLU A  10     8186   8075   6184    196   -909   -456       O  
ATOM     63  OE2 GLU A  10      30.309 -27.376  41.079  1.00 59.40           O1-
ANISOU   63  OE2 GLU A  10     8222   8127   6222    -28  -1009   -626       O1-
ATOM     64  N   ALA A  11      30.348 -32.614  37.919  1.00 48.39           N  
ANISOU   64  N   ALA A  11     6144   6824   5417    351   -869   -239       N  
ATOM     65  CA  ALA A  11      30.689 -33.990  38.249  1.00 49.22           C  
ANISOU   65  CA  ALA A  11     6181   6983   5536    461   -912   -141       C  
ATOM     66  C   ALA A  11      29.458 -34.857  37.979  1.00 56.12           C  
ANISOU   66  C   ALA A  11     7108   7778   6436    554   -755    -61       C  
ATOM     67  O   ALA A  11      28.319 -34.437  38.202  1.00 63.46           O  
ANISOU   67  O   ALA A  11     8172   8638   7304    559   -653    -67       O  
ATOM     68  CB  ALA A  11      31.327 -34.063  39.650  1.00 41.34           C  
ANISOU   68  CB  ALA A  11     5252   6071   4385    485  -1070   -130       C  
ATOM     69  N   LEU A  12      29.712 -36.112  37.620  1.00 51.48           N  
ANISOU   69  N   LEU A  12     6421   7206   5934    633   -739     20       N  
ATOM     70  CA  LEU A  12      28.668 -37.112  37.424  1.00 40.10           C  
ANISOU   70  CA  LEU A  12     5025   5699   4514    716   -601    103       C  
ATOM     71  C   LEU A  12      29.266 -38.389  38.021  1.00 38.00           C  
ANISOU   71  C   LEU A  12     4728   5480   4230    826   -663    193       C  
ATOM     72  O   LEU A  12      30.450 -38.670  37.811  1.00 36.43           O  
ANISOU   72  O   LEU A  12     4394   5347   4101    831   -759    199       O  
ATOM     73  CB  LEU A  12      28.304 -37.327  35.950  1.00 33.03           C  
ANISOU   73  CB  LEU A  12     4032   4744   3772    675   -481    104       C  
ATOM     74  CG  LEU A  12      27.199 -38.329  35.606  1.00 31.86           C  
ANISOU   74  CG  LEU A  12     3923   4528   3652    733   -336    183       C  
ATOM     75  CD1 LEU A  12      25.850 -37.846  36.131  1.00 30.43           C  
ANISOU   75  CD1 LEU A  12     3886   4297   3378    739   -251    186       C  
ATOM     76  CD2 LEU A  12      27.133 -38.581  34.089  1.00 28.74           C  
ANISOU   76  CD2 LEU A  12     3420   4092   3409    674   -247    180       C  
ATOM     77  N   PRO A  13      28.474 -39.145  38.804  1.00 33.71           N  
ANISOU   77  N   PRO A  13     4310   4905   3593    918   -606    267       N  
ATOM     78  CA  PRO A  13      29.016 -40.400  39.340  1.00 33.51           C  
ANISOU   78  CA  PRO A  13     4266   4914   3553   1031   -655    362       C  
ATOM     79  C   PRO A  13      29.335 -41.381  38.214  1.00 33.14           C  
ANISOU   79  C   PRO A  13     4082   4840   3671   1060   -580    408       C  
ATOM     80  O   PRO A  13      28.706 -41.334  37.152  1.00 32.47           O  
ANISOU   80  O   PRO A  13     3967   4689   3680   1004   -455    386       O  
ATOM     81  CB  PRO A  13      27.865 -40.944  40.191  1.00 35.49           C  
ANISOU   81  CB  PRO A  13     4693   5109   3682   1104   -563    423       C  
ATOM     82  CG  PRO A  13      27.053 -39.731  40.550  1.00 37.71           C  
ANISOU   82  CG  PRO A  13     5093   5363   3872   1033   -531    349       C  
ATOM     83  CD  PRO A  13      27.128 -38.854  39.329  1.00 32.87           C  
ANISOU   83  CD  PRO A  13     4369   4734   3385    926   -501    269       C  
ATOM     84  N   SER A  14      30.302 -42.259  38.440  1.00 36.08           N  
ANISOU   84  N   SER A  14     4374   5259   4075   1146   -654    475       N  
ATOM     85  CA  SER A  14      30.622 -43.291  37.459  1.00 34.87           C  
ANISOU   85  CA  SER A  14     4112   5066   4072   1188   -566    526       C  
ATOM     86  C   SER A  14      29.586 -44.403  37.536  1.00 36.19           C  
ANISOU   86  C   SER A  14     4394   5144   4212   1260   -419    606       C  
ATOM     87  O   SER A  14      29.283 -45.046  36.532  1.00 30.26           O  
ANISOU   87  O   SER A  14     3606   4322   3567   1248   -288    623       O  
ATOM     88  CB  SER A  14      32.009 -43.872  37.736  1.00 33.75           C  
ANISOU   88  CB  SER A  14     3844   5002   3978   1273   -687    581       C  
ATOM     89  OG  SER A  14      32.017 -44.591  38.965  1.00 34.23           O  
ANISOU   89  OG  SER A  14     4002   5087   3917   1394   -749    673       O  
ATOM     90  N   ASP A  15      29.045 -44.625  38.738  1.00 30.01           N  
ANISOU   90  N   ASP A  15     3760   4362   3279   1326   -438    653       N  
ATOM     91  CA  ASP A  15      28.116 -45.725  38.980  1.00 29.83           C  
ANISOU   91  CA  ASP A  15     3857   4259   3217   1399   -306    735       C  
ATOM     92  C   ASP A  15      27.085 -45.373  40.029  1.00 31.93           C  
ANISOU   92  C   ASP A  15     4300   4511   3322   1402   -285    736       C  
ATOM     93  O   ASP A  15      27.410 -44.735  41.043  1.00 32.49           O  
ANISOU   93  O   ASP A  15     4430   4643   3270   1412   -410    716       O  
ATOM     94  CB  ASP A  15      28.853 -46.957  39.494  1.00 31.20           C  
ANISOU   94  CB  ASP A  15     4026   4442   3386   1537   -342    841       C  
ATOM     95  CG  ASP A  15      29.836 -47.510  38.496  1.00 37.77           C  
ANISOU   95  CG  ASP A  15     4693   5273   4386   1558   -331    858       C  
ATOM     96  OD1 ASP A  15      29.463 -48.460  37.778  1.00 39.95           O  
ANISOU   96  OD1 ASP A  15     4979   5459   4741   1577   -181    899       O  
ATOM     97  OD2 ASP A  15      30.978 -47.006  38.450  1.00 33.40           O1-
ANISOU   97  OD2 ASP A  15     4005   4805   3881   1552   -466    831       O1-
ATOM     98  N   ILE A  16      25.862 -45.845  39.814  1.00 31.81           N  
ANISOU   98  N   ILE A  16     4371   4413   3303   1394   -124    763       N  
ATOM     99  CA  ILE A  16      24.788 -45.714  40.798  1.00 32.42           C  
ANISOU   99  CA  ILE A  16     4619   4462   3239   1410    -68    779       C  
ATOM    100  C   ILE A  16      23.984 -47.009  40.824  1.00 32.59           C  
ANISOU  100  C   ILE A  16     4723   4403   3256   1466     82    867       C  
ATOM    101  O   ILE A  16      23.577 -47.509  39.765  1.00 33.45           O  
ANISOU  101  O   ILE A  16     4772   4458   3480   1421    197    873       O  
ATOM    102  CB  ILE A  16      23.832 -44.554  40.425  1.00 30.99           C  
ANISOU  102  CB  ILE A  16     4450   4262   3062   1305     -3    699       C  
ATOM    103  CG1 ILE A  16      24.587 -43.224  40.377  1.00 30.97           C  
ANISOU  103  CG1 ILE A  16     4384   4325   3059   1239   -136    606       C  
ATOM    104  CG2 ILE A  16      22.671 -44.475  41.415  1.00 33.78           C  
ANISOU  104  CG2 ILE A  16     4974   4578   3282   1330     82    722       C  
ATOM    105  CD1 ILE A  16      23.731 -42.049  39.889  1.00 31.25           C  
ANISOU  105  CD1 ILE A  16     4423   4332   3116   1143    -68    531       C  
ATOM    106  N   SER A  17      23.757 -47.554  42.017  1.00 34.52           N  
ANISOU  106  N   SER A  17     5115   4637   3365   1553     81    932       N  
ATOM    107  CA  SER A  17      22.924 -48.744  42.184  1.00 32.37           C  
ANISOU  107  CA  SER A  17     4946   4283   3069   1601    231   1015       C  
ATOM    108  C   SER A  17      21.643 -48.400  42.916  1.00 37.67           C  
ANISOU  108  C   SER A  17     5763   4922   3629   1578    328   1010       C  
ATOM    109  O   SER A  17      21.667 -47.693  43.926  1.00 38.04           O  
ANISOU  109  O   SER A  17     5902   5004   3546   1596    254    987       O  
ATOM    110  CB  SER A  17      23.667 -49.844  42.946  1.00 31.96           C  
ANISOU  110  CB  SER A  17     4959   4229   2956   1733    179   1112       C  
ATOM    111  OG  SER A  17      24.892 -50.156  42.314  1.00 37.54           O  
ANISOU  111  OG  SER A  17     5522   4968   3775   1768     94   1124       O  
ATOM    112  N   ILE A  18      20.524 -48.907  42.414  1.00 35.66           N  
ANISOU  112  N   ILE A  18     5528   4598   3423   1535    497   1032       N  
ATOM    113  CA  ILE A  18      19.246 -48.681  43.063  1.00 38.22           C  
ANISOU  113  CA  ILE A  18     5974   4889   3659   1517    612   1038       C  
ATOM    114  C   ILE A  18      18.348 -49.903  42.930  1.00 45.30           C  
ANISOU  114  C   ILE A  18     6934   5706   4570   1520    782   1111       C  
ATOM    115  O   ILE A  18      18.404 -50.630  41.932  1.00 43.70           O  
ANISOU  115  O   ILE A  18     6653   5471   4482   1485    839   1130       O  
ATOM    116  CB  ILE A  18      18.524 -47.447  42.499  1.00 39.89           C  
ANISOU  116  CB  ILE A  18     6114   5117   3926   1418    646    959       C  
ATOM    117  CG1 ILE A  18      17.389 -47.019  43.441  1.00 47.59           C  
ANISOU  117  CG1 ILE A  18     7224   6068   4792   1424    743    963       C  
ATOM    118  CG2 ILE A  18      18.021 -47.720  41.083  1.00 38.65           C  
ANISOU  118  CG2 ILE A  18     5828   4933   3925   1328    739    954       C  
ATOM    119  CD1 ILE A  18      16.721 -45.725  43.038  1.00 49.03           C  
ANISOU  119  CD1 ILE A  18     7347   6263   5020   1350    774    894       C  
ATOM    120  N   ASP A  19      17.525 -50.124  43.950  1.00 44.04           N  
ANISOU  120  N   ASP A  19     6930   5513   4291   1555    869   1151       N  
ATOM    121  CA  ASP A  19      16.600 -51.248  43.962  1.00 48.18           C  
ANISOU  121  CA  ASP A  19     7532   5962   4815   1550   1039   1220       C  
ATOM    122  C   ASP A  19      15.543 -51.143  42.865  1.00 46.29           C  
ANISOU  122  C   ASP A  19     7186   5703   4698   1429   1166   1197       C  
ATOM    123  O   ASP A  19      14.969 -50.080  42.625  1.00 42.50           O  
ANISOU  123  O   ASP A  19     6641   5258   4251   1367   1173   1143       O  
ATOM    124  CB  ASP A  19      15.912 -51.379  45.325  1.00 50.74           C  
ANISOU  124  CB  ASP A  19     8045   6255   4979   1605   1112   1260       C  
ATOM    125  CG  ASP A  19      16.846 -51.891  46.410  1.00 54.82           C  
ANISOU  125  CG  ASP A  19     8695   6774   5360   1726   1009   1314       C  
ATOM    126  OD1 ASP A  19      17.903 -52.460  46.077  1.00 53.83           O  
ANISOU  126  OD1 ASP A  19     8515   6658   5279   1778    915   1343       O  
ATOM    127  OD2 ASP A  19      16.508 -51.737  47.602  1.00 61.56           O1-
ANISOU  127  OD2 ASP A  19     9711   7618   6061   1772   1026   1332       O1-
ATOM    128  N   GLU A  20      15.298 -52.272  42.216  1.00 48.18           N  
ANISOU  128  N   GLU A  20     7415   5886   5003   1395   1266   1243       N  
ATOM    129  CA  GLU A  20      14.216 -52.420  41.258  1.00 52.34           C  
ANISOU  129  CA  GLU A  20     7866   6393   5629   1271   1394   1239       C  
ATOM    130  C   GLU A  20      12.887 -51.987  41.860  1.00 54.12           C  
ANISOU  130  C   GLU A  20     8139   6619   5805   1242   1505   1247       C  
ATOM    131  O   GLU A  20      12.553 -52.366  42.983  1.00 56.96           O  
ANISOU  131  O   GLU A  20     8647   6946   6050   1308   1567   1291       O  
ATOM    132  CB  GLU A  20      14.141 -53.885  40.829  1.00 63.12           C  
ANISOU  132  CB  GLU A  20     9277   7680   7024   1251   1501   1298       C  
ATOM    133  CG  GLU A  20      12.971 -54.239  39.944  1.00 72.40           C  
ANISOU  133  CG  GLU A  20    10397   8831   8279   1109   1640   1305       C  
ATOM    134  CD  GLU A  20      13.081 -55.649  39.395  1.00 81.01           C  
ANISOU  134  CD  GLU A  20    11540   9839   9402   1075   1734   1349       C  
ATOM    135  OE1 GLU A  20      13.537 -56.546  40.139  1.00 83.14           O  
ANISOU  135  OE1 GLU A  20    11945  10047   9595   1176   1760   1404       O  
ATOM    136  OE2 GLU A  20      12.728 -55.853  38.213  1.00 85.24           O1-
ANISOU  136  OE2 GLU A  20    11988  10366  10034    946   1783   1331       O1-
ATOM    137  N   GLY A  21      12.129 -51.193  41.113  1.00 53.24           N  
ANISOU  137  N   GLY A  21     7902   6544   5782   1146   1534   1211       N  
ATOM    138  CA  GLY A  21      10.817 -50.759  41.561  1.00 53.34           C  
ANISOU  138  CA  GLY A  21     7931   6561   5775   1117   1651   1225       C  
ATOM    139  C   GLY A  21      10.771 -49.380  42.193  1.00 53.68           C  
ANISOU  139  C   GLY A  21     7981   6645   5771   1165   1598   1177       C  
ATOM    140  O   GLY A  21       9.691 -48.829  42.407  1.00 57.49           O  
ANISOU  140  O   GLY A  21     8448   7134   6263   1142   1697   1182       O  
ATOM    141  N   LYS A  22      11.936 -48.816  42.496  1.00 53.87           N  
ANISOU  141  N   LYS A  22     8028   6695   5747   1228   1448   1130       N  
ATOM    142  CA  LYS A  22      12.007 -47.479  43.087  1.00 50.17           C  
ANISOU  142  CA  LYS A  22     7583   6256   5223   1263   1391   1075       C  
ATOM    143  C   LYS A  22      12.120 -46.381  42.030  1.00 52.66           C  
ANISOU  143  C   LYS A  22     7738   6617   5655   1196   1323   1013       C  
ATOM    144  O   LYS A  22      12.310 -46.659  40.844  1.00 52.06           O  
ANISOU  144  O   LYS A  22     7534   6554   5694   1126   1297   1010       O  
ATOM    145  CB  LYS A  22      13.192 -47.383  44.042  1.00 51.37           C  
ANISOU  145  CB  LYS A  22     7853   6418   5246   1352   1257   1055       C  
ATOM    146  CG  LYS A  22      13.062 -48.275  45.263  1.00 56.20           C  
ANISOU  146  CG  LYS A  22     8651   6985   5715   1430   1317   1118       C  
ATOM    147  CD  LYS A  22      14.171 -48.017  46.266  1.00 60.93           C  
ANISOU  147  CD  LYS A  22     9369   7608   6174   1513   1169   1101       C  
ATOM    148  CE  LYS A  22      14.026 -48.933  47.470  1.00 64.06           C  
ANISOU  148  CE  LYS A  22     9963   7956   6419   1591   1227   1172       C  
ATOM    149  NZ  LYS A  22      15.015 -48.605  48.531  1.00 68.87           N1+
ANISOU  149  NZ  LYS A  22    10699   8597   6872   1664   1076   1160       N1+
ATOM    150  N   VAL A  23      12.030 -45.131  42.472  1.00 52.27           N  
ANISOU  150  N   VAL A  23     7711   6582   5567   1216   1298    962       N  
ATOM    151  CA  VAL A  23      12.193 -43.989  41.578  1.00 55.76           C  
ANISOU  151  CA  VAL A  23     8023   7058   6104   1163   1231    902       C  
ATOM    152  C   VAL A  23      13.620 -43.451  41.645  1.00 54.71           C  
ANISOU  152  C   VAL A  23     7898   6955   5935   1182   1057    836       C  
ATOM    153  O   VAL A  23      14.059 -42.960  42.686  1.00 56.15           O  
ANISOU  153  O   VAL A  23     8202   7138   5994   1236   1004    804       O  
ATOM    154  CB  VAL A  23      11.209 -42.857  41.923  1.00 59.54           C  
ANISOU  154  CB  VAL A  23     8517   7527   6580   1170   1322    887       C  
ATOM    155  CG1 VAL A  23      11.511 -41.620  41.091  1.00 56.73           C  
ANISOU  155  CG1 VAL A  23     8052   7196   6306   1127   1244    824       C  
ATOM    156  CG2 VAL A  23       9.775 -43.316  41.707  1.00 59.99           C  
ANISOU  156  CG2 VAL A  23     8523   7569   6701   1141   1490    957       C  
ATOM    157  N   LEU A  24      14.341 -43.547  40.532  1.00 50.24           N  
ANISOU  157  N   LEU A  24     7203   6415   5471   1129    971    813       N  
ATOM    158  CA  LEU A  24      15.723 -43.097  40.474  1.00 45.15           C  
ANISOU  158  CA  LEU A  24     6538   5806   4813   1136    809    753       C  
ATOM    159  C   LEU A  24      15.778 -41.609  40.151  1.00 43.97           C  
ANISOU  159  C   LEU A  24     6340   5672   4693   1094    763    678       C  
ATOM    160  O   LEU A  24      15.096 -41.129  39.240  1.00 44.30           O  
ANISOU  160  O   LEU A  24     6286   5710   4837   1034    820    674       O  
ATOM    161  CB  LEU A  24      16.502 -43.895  39.427  1.00 45.95           C  
ANISOU  161  CB  LEU A  24     6527   5918   5015   1101    755    763       C  
ATOM    162  CG  LEU A  24      17.934 -43.443  39.137  1.00 45.80           C  
ANISOU  162  CG  LEU A  24     6443   5941   5017   1096    596    704       C  
ATOM    163  CD1 LEU A  24      18.813 -43.633  40.356  1.00 41.48           C  
ANISOU  163  CD1 LEU A  24     6000   5417   4344   1182    496    709       C  
ATOM    164  CD2 LEU A  24      18.501 -44.189  37.949  1.00 49.54           C  
ANISOU  164  CD2 LEU A  24     6799   6412   5611   1053    584    715       C  
ATOM    165  N   THR A  25      16.594 -40.881  40.896  1.00 39.11           N  
ANISOU  165  N   THR A  25     5798   5076   3984   1120    658    621       N  
ATOM    166  CA  THR A  25      16.768 -39.458  40.668  1.00 41.70           C  
ANISOU  166  CA  THR A  25     6105   5411   4326   1077    612    542       C  
ATOM    167  C   THR A  25      18.258 -39.155  40.567  1.00 43.49           C  
ANISOU  167  C   THR A  25     6295   5686   4544   1055    440    481       C  
ATOM    168  O   THR A  25      19.008 -39.391  41.512  1.00 48.96           O  
ANISOU  168  O   THR A  25     7073   6403   5125   1099    350    477       O  
ATOM    169  CB  THR A  25      16.136 -38.629  41.807  1.00 45.77           C  
ANISOU  169  CB  THR A  25     6775   5893   4721   1116    677    521       C  
ATOM    170  CG2 THR A  25      16.351 -37.149  41.575  1.00 44.31           C  
ANISOU  170  CG2 THR A  25     6585   5702   4547   1071    639    437       C  
ATOM    171  OG1 THR A  25      14.726 -38.892  41.869  1.00 48.29           O  
ANISOU  171  OG1 THR A  25     7109   6172   5066   1138    848    582       O  
ATOM    172  N   VAL A  26      18.692 -38.650  39.416  1.00 36.52           N  
ANISOU  172  N   VAL A  26     5280   4819   3778    984    393    438       N  
ATOM    173  CA  VAL A  26      20.100 -38.340  39.214  1.00 33.89           C  
ANISOU  173  CA  VAL A  26     4889   4533   3455    953    240    379       C  
ATOM    174  C   VAL A  26      20.301 -36.859  38.918  1.00 35.70           C  
ANISOU  174  C   VAL A  26     5108   4759   3697    885    202    291       C  
ATOM    175  O   VAL A  26      20.051 -36.401  37.799  1.00 35.10           O  
ANISOU  175  O   VAL A  26     4934   4667   3733    825    238    274       O  
ATOM    176  CB  VAL A  26      20.702 -39.179  38.056  1.00 35.31           C  
ANISOU  176  CB  VAL A  26     4921   4731   3766    924    214    403       C  
ATOM    177  CG1 VAL A  26      22.203 -38.960  37.958  1.00 32.65           C  
ANISOU  177  CG1 VAL A  26     4515   4449   3442    903     62    351       C  
ATOM    178  CG2 VAL A  26      20.388 -40.653  38.244  1.00 32.65           C  
ANISOU  178  CG2 VAL A  26     4604   4378   3424    985    278    492       C  
ATOM    179  N   ALA A  27      20.760 -36.110  39.919  1.00 33.46           N  
ANISOU  179  N   ALA A  27     4935   4487   3289    889    130    236       N  
ATOM    180  CA  ALA A  27      21.019 -34.683  39.749  1.00 32.14           C  
ANISOU  180  CA  ALA A  27     4786   4308   3118    820     96    146       C  
ATOM    181  C   ALA A  27      22.476 -34.472  39.407  1.00 36.79           C  
ANISOU  181  C   ALA A  27     5285   4959   3736    759    -62     87       C  
ATOM    182  O   ALA A  27      23.350 -35.164  39.927  1.00 40.53           O  
ANISOU  182  O   ALA A  27     5747   5490   4162    788   -169    105       O  
ATOM    183  CB  ALA A  27      20.645 -33.906  40.998  1.00 33.04           C  
ANISOU  183  CB  ALA A  27     5088   4390   3077    841    123    110       C  
ATOM    184  N   CYS A  28      22.737 -33.529  38.513  1.00 34.53           N  
ANISOU  184  N   CYS A  28     4928   4661   3532    677    -74     23       N  
ATOM    185  CA  CYS A  28      24.091 -33.272  38.063  1.00 33.57           C  
ANISOU  185  CA  CYS A  28     4704   4595   3456    607   -208    -35       C  
ATOM    186  C   CYS A  28      24.277 -31.789  37.799  1.00 34.83           C  
ANISOU  186  C   CYS A  28     4896   4726   3614    515   -221   -131       C  
ATOM    187  O   CYS A  28      23.580 -31.207  36.967  1.00 35.62           O  
ANISOU  187  O   CYS A  28     4976   4767   3791    487   -125   -138       O  
ATOM    188  CB  CYS A  28      24.379 -34.074  36.789  1.00 38.25           C  
ANISOU  188  CB  CYS A  28     5126   5202   4205    593   -196      3       C  
ATOM    189  SG  CYS A  28      26.024 -33.791  36.122  1.00 53.70           S  
ANISOU  189  SG  CYS A  28     6937   7223   6242    508   -336    -65       S  
ATOM    190  N   ALA A  29      25.220 -31.177  38.505  1.00 34.56           N  
ANISOU  190  N   ALA A  29     4913   4731   3486    465   -341   -202       N  
ATOM    191  CA  ALA A  29      25.463 -29.744  38.375  1.00 36.89           C  
ANISOU  191  CA  ALA A  29     5264   4993   3761    367   -353   -301       C  
ATOM    192  C   ALA A  29      26.380 -29.428  37.191  1.00 36.08           C  
ANISOU  192  C   ALA A  29     5004   4917   3789    274   -412   -349       C  
ATOM    193  O   ALA A  29      27.235 -30.235  36.822  1.00 32.97           O  
ANISOU  193  O   ALA A  29     4468   4592   3465    274   -493   -325       O  
ATOM    194  CB  ALA A  29      26.052 -29.178  39.687  1.00 40.21           C  
ANISOU  194  CB  ALA A  29     5827   5441   4007    332   -456   -365       C  
ATOM    195  N   PHE A  30      26.207 -28.251  36.598  1.00 34.79           N  
ANISOU  195  N   PHE A  30     4868   4690   3658    198   -361   -414       N  
ATOM    196  CA  PHE A  30      27.080 -27.851  35.506  1.00 34.34           C  
ANISOU  196  CA  PHE A  30     4682   4650   3714     98   -408   -466       C  
ATOM    197  C   PHE A  30      27.233 -26.346  35.392  1.00 37.18           C  
ANISOU  197  C   PHE A  30     5131   4953   4044     -4   -396   -564       C  
ATOM    198  O   PHE A  30      26.511 -25.566  36.031  1.00 34.44           O  
ANISOU  198  O   PHE A  30     4949   4535   3601      9   -328   -588       O  
ATOM    199  CB  PHE A  30      26.601 -28.440  34.164  1.00 28.07           C  
ANISOU  199  CB  PHE A  30     3761   3831   3072    118   -321   -404       C  
ATOM    200  CG  PHE A  30      25.233 -27.974  33.752  1.00 27.57           C  
ANISOU  200  CG  PHE A  30     3769   3678   3030    150   -179   -369       C  
ATOM    201  CD1 PHE A  30      25.057 -26.725  33.182  1.00 29.08           C  
ANISOU  201  CD1 PHE A  30     4004   3801   3245     82   -131   -424       C  
ATOM    202  CD2 PHE A  30      24.124 -28.784  33.941  1.00 26.16           C  
ANISOU  202  CD2 PHE A  30     3608   3483   2848    249    -91   -277       C  
ATOM    203  CE1 PHE A  30      23.794 -26.287  32.810  1.00 33.44           C  
ANISOU  203  CE1 PHE A  30     4609   4273   3822    124     -4   -379       C  
ATOM    204  CE2 PHE A  30      22.857 -28.353  33.578  1.00 32.86           C  
ANISOU  204  CE2 PHE A  30     4502   4260   3724    281     34   -236       C  
ATOM    205  CZ  PHE A  30      22.691 -27.103  33.014  1.00 34.38           C  
ANISOU  205  CZ  PHE A  30     4730   4389   3945    224     75   -283       C  
ATOM    206  N   THR A  31      28.193 -25.957  34.564  1.00 35.81           N  
ANISOU  206  N   THR A  31     4849   4802   3954   -108   -454   -622       N  
ATOM    207  CA  THR A  31      28.464 -24.566  34.268  1.00 37.08           C  
ANISOU  207  CA  THR A  31     5079   4906   4106   -221   -441   -718       C  
ATOM    208  C   THR A  31      28.478 -24.382  32.747  1.00 33.29           C  
ANISOU  208  C   THR A  31     4486   4386   3775   -270   -380   -715       C  
ATOM    209  O   THR A  31      28.601 -25.360  32.004  1.00 30.43           O  
ANISOU  209  O   THR A  31     3980   4064   3518   -238   -380   -656       O  
ATOM    210  CB  THR A  31      29.808 -24.147  34.882  1.00 51.51           C  
ANISOU  210  CB  THR A  31     6899   6808   5865   -331   -590   -808       C  
ATOM    211  CG2 THR A  31      30.905 -25.059  34.396  1.00 52.30           C  
ANISOU  211  CG2 THR A  31     6789   7015   6068   -348   -693   -787       C  
ATOM    212  OG1 THR A  31      30.114 -22.799  34.511  1.00 62.31           O  
ANISOU  212  OG1 THR A  31     8333   8112   7229   -457   -570   -906       O  
ATOM    213  N   GLY A  32      28.324 -23.140  32.299  1.00 30.00           N  
ANISOU  213  N   GLY A  32     4152   3886   3363   -345   -321   -776       N  
ATOM    214  CA  GLY A  32      28.276 -22.815  30.885  1.00 32.49           C  
ANISOU  214  CA  GLY A  32     4392   4151   3802   -397   -259   -774       C  
ATOM    215  C   GLY A  32      27.421 -21.590  30.629  1.00 33.31           C  
ANISOU  215  C   GLY A  32     4638   4133   3886   -406   -147   -791       C  
ATOM    216  O   GLY A  32      26.364 -21.420  31.236  1.00 34.53           O  
ANISOU  216  O   GLY A  32     4908   4233   3977   -315    -70   -750       O  
ATOM    217  N   GLU A  33      27.889 -20.735  29.729  1.00 33.35           N  
ANISOU  217  N   GLU A  33     4634   4090   3947   -512   -131   -849       N  
ATOM    218  CA  GLU A  33      27.194 -19.506  29.375  1.00 32.38           C  
ANISOU  218  CA  GLU A  33     4646   3843   3815   -526    -24   -864       C  
ATOM    219  C   GLU A  33      27.468 -19.227  27.909  1.00 30.52           C  
ANISOU  219  C   GLU A  33     4328   3574   3693   -603      4   -866       C  
ATOM    220  O   GLU A  33      28.627 -19.162  27.513  1.00 32.87           O  
ANISOU  220  O   GLU A  33     4547   3913   4028   -717    -63   -935       O  
ATOM    221  CB  GLU A  33      27.724 -18.326  30.201  1.00 33.61           C  
ANISOU  221  CB  GLU A  33     4959   3951   3860   -614    -42   -977       C  
ATOM    222  CG  GLU A  33      27.556 -18.485  31.704  1.00 42.90           C  
ANISOU  222  CG  GLU A  33     6246   5154   4900   -560    -74   -991       C  
ATOM    223  CD  GLU A  33      26.109 -18.384  32.140  1.00 45.97           C  
ANISOU  223  CD  GLU A  33     6756   5462   5250   -421     53   -916       C  
ATOM    224  OE1 GLU A  33      25.315 -17.733  31.420  1.00 50.56           O  
ANISOU  224  OE1 GLU A  33     7379   5943   5886   -389    168   -880       O  
ATOM    225  OE2 GLU A  33      25.768 -18.971  33.187  1.00 44.41           O1-
ANISOU  225  OE2 GLU A  33     6604   5303   4969   -342     39   -887       O1-
ATOM    226  N   PRO A  34      26.409 -19.066  27.098  1.00 30.34           N  
ANISOU  226  N   PRO A  34     4321   3482   3727   -543    103   -786       N  
ATOM    227  CA  PRO A  34      24.999 -19.167  27.489  1.00 29.08           C  
ANISOU  227  CA  PRO A  34     4228   3281   3542   -405    188   -693       C  
ATOM    228  C   PRO A  34      24.677 -20.587  27.955  1.00 31.46           C  
ANISOU  228  C   PRO A  34     4432   3676   3844   -314    153   -619       C  
ATOM    229  O   PRO A  34      25.458 -21.512  27.718  1.00 31.95           O  
ANISOU  229  O   PRO A  34     4369   3824   3947   -350     74   -624       O  
ATOM    230  CB  PRO A  34      24.246 -18.872  26.177  1.00 34.33           C  
ANISOU  230  CB  PRO A  34     4864   3882   4296   -394    265   -618       C  
ATOM    231  CG  PRO A  34      25.245 -18.208  25.282  1.00 32.58           C  
ANISOU  231  CG  PRO A  34     4631   3631   4115   -534    241   -697       C  
ATOM    232  CD  PRO A  34      26.560 -18.815  25.652  1.00 32.31           C  
ANISOU  232  CD  PRO A  34     4509   3694   4074   -614    133   -775       C  
ATOM    233  N   THR A  35      23.535 -20.753  28.607  1.00 31.63           N  
ANISOU  233  N   THR A  35     4516   3675   3826   -194    221   -548       N  
ATOM    234  CA  THR A  35      23.167 -22.041  29.178  1.00 36.64           C  
ANISOU  234  CA  THR A  35     5086   4388   4448   -108    200   -480       C  
ATOM    235  C   THR A  35      23.266 -23.144  28.134  1.00 31.98           C  
ANISOU  235  C   THR A  35     4334   3859   3960   -122    173   -419       C  
ATOM    236  O   THR A  35      22.744 -23.006  27.039  1.00 29.56           O  
ANISOU  236  O   THR A  35     3983   3519   3729   -136    221   -368       O  
ATOM    237  CB  THR A  35      21.743 -22.011  29.711  1.00 40.50           C  
ANISOU  237  CB  THR A  35     5647   4833   4909     18    306   -397       C  
ATOM    238  CG2 THR A  35      21.389 -23.350  30.335  1.00 41.96           C  
ANISOU  238  CG2 THR A  35     5776   5094   5075     98    290   -331       C  
ATOM    239  OG1 THR A  35      21.631 -20.976  30.695  1.00 44.78           O  
ANISOU  239  OG1 THR A  35     6360   5303   5352     34    351   -456       O  
ATOM    240  N   PRO A  36      23.946 -24.246  28.475  1.00 29.94           N  
ANISOU  240  N   PRO A  36     3992   3686   3697   -120     96   -422       N  
ATOM    241  CA  PRO A  36      24.119 -25.330  27.505  1.00 24.17           C  
ANISOU  241  CA  PRO A  36     3122   3003   3058   -139     82   -371       C  
ATOM    242  C   PRO A  36      22.828 -26.085  27.258  1.00 23.21           C  
ANISOU  242  C   PRO A  36     2975   2880   2965    -58    155   -258       C  
ATOM    243  O   PRO A  36      21.954 -26.173  28.126  1.00 24.51           O  
ANISOU  243  O   PRO A  36     3203   3036   3073     33    199   -213       O  
ATOM    244  CB  PRO A  36      25.127 -26.263  28.185  1.00 29.66           C  
ANISOU  244  CB  PRO A  36     3757   3782   3730   -133     -9   -397       C  
ATOM    245  CG  PRO A  36      25.701 -25.473  29.320  1.00 32.57           C  
ANISOU  245  CG  PRO A  36     4222   4155   3998   -149    -66   -479       C  
ATOM    246  CD  PRO A  36      24.659 -24.504  29.735  1.00 28.21           C  
ANISOU  246  CD  PRO A  36     3811   3522   3386   -108     18   -472       C  
ATOM    247  N   GLU A  37      22.719 -26.632  26.056  1.00 25.00           N  
ANISOU  247  N   GLU A  37     3109   3112   3276   -101    171   -214       N  
ATOM    248  CA  GLU A  37      21.648 -27.548  25.725  1.00 23.32           C  
ANISOU  248  CA  GLU A  37     2852   2914   3094    -51    223   -110       C  
ATOM    249  C   GLU A  37      21.995 -28.874  26.360  1.00 21.59           C  
ANISOU  249  C   GLU A  37     2591   2756   2855     -7    193    -92       C  
ATOM    250  O   GLU A  37      23.126 -29.331  26.250  1.00 21.91           O  
ANISOU  250  O   GLU A  37     2579   2831   2916    -47    135   -140       O  
ATOM    251  CB  GLU A  37      21.559 -27.714  24.200  1.00 21.67           C  
ANISOU  251  CB  GLU A  37     2572   2693   2968   -134    240    -79       C  
ATOM    252  CG  GLU A  37      20.515 -28.710  23.736  1.00 22.23           C  
ANISOU  252  CG  GLU A  37     2592   2785   3068   -112    285     25       C  
ATOM    253  CD  GLU A  37      20.241 -28.571  22.229  1.00 26.30           C  
ANISOU  253  CD  GLU A  37     3067   3278   3646   -204    301     59       C  
ATOM    254  OE1 GLU A  37      19.648 -27.554  21.829  1.00 28.91           O  
ANISOU  254  OE1 GLU A  37     3431   3569   3984   -209    322     83       O  
ATOM    255  OE2 GLU A  37      20.643 -29.456  21.458  1.00 27.57           O1-
ANISOU  255  OE2 GLU A  37     3174   3458   3844   -270    294     63       O1-
ATOM    256  N   VAL A  38      21.019 -29.486  27.020  1.00 25.76           N  
ANISOU  256  N   VAL A  38     3142   3296   3349     80    238    -20       N  
ATOM    257  CA  VAL A  38      21.240 -30.708  27.794  1.00 21.82           C  
ANISOU  257  CA  VAL A  38     2630   2845   2816    137    219      4       C  
ATOM    258  C   VAL A  38      20.701 -31.912  27.018  1.00 25.26           C  
ANISOU  258  C   VAL A  38     2994   3294   3309    126    264     83       C  
ATOM    259  O   VAL A  38      19.550 -31.919  26.597  1.00 24.52           O  
ANISOU  259  O   VAL A  38     2893   3186   3238    129    327    151       O  
ATOM    260  CB  VAL A  38      20.516 -30.624  29.180  1.00 24.93           C  
ANISOU  260  CB  VAL A  38     3119   3236   3117    239    252     29       C  
ATOM    261  CG1 VAL A  38      20.604 -31.950  29.944  1.00 23.43           C  
ANISOU  261  CG1 VAL A  38     2927   3089   2888    303    242     70       C  
ATOM    262  CG2 VAL A  38      21.090 -29.475  30.037  1.00 24.10           C  
ANISOU  262  CG2 VAL A  38     3110   3113   2936    240    209    -56       C  
ATOM    263  N   THR A  39      21.529 -32.927  26.818  1.00 21.31           N  
ANISOU  263  N   THR A  39     2440   2822   2835    109    233     75       N  
ATOM    264  CA  THR A  39      21.043 -34.161  26.229  1.00 21.62           C  
ANISOU  264  CA  THR A  39     2436   2865   2913     98    285    145       C  
ATOM    265  C   THR A  39      21.432 -35.365  27.060  1.00 23.15           C  
ANISOU  265  C   THR A  39     2637   3086   3074    169    277    167       C  
ATOM    266  O   THR A  39      22.618 -35.648  27.242  1.00 26.76           O  
ANISOU  266  O   THR A  39     3065   3563   3539    175    220    124       O  
ATOM    267  CB  THR A  39      21.599 -34.381  24.776  1.00 26.88           C  
ANISOU  267  CB  THR A  39     3036   3517   3661    -10    288    126       C  
ATOM    268  CG2 THR A  39      20.930 -35.585  24.119  1.00 23.68           C  
ANISOU  268  CG2 THR A  39     2609   3106   3284    -39    352    198       C  
ATOM    269  OG1 THR A  39      21.358 -33.218  23.988  1.00 24.43           O  
ANISOU  269  OG1 THR A  39     2727   3179   3376    -78    287    104       O  
ATOM    270  N   TRP A  40      20.429 -36.081  27.555  1.00 23.81           N  
ANISOU  270  N   TRP A  40     2753   3170   3123    223    336    240       N  
ATOM    271  CA  TRP A  40      20.655 -37.384  28.170  1.00 23.05           C  
ANISOU  271  CA  TRP A  40     2672   3087   3001    285    348    277       C  
ATOM    272  C   TRP A  40      20.391 -38.430  27.098  1.00 25.96           C  
ANISOU  272  C   TRP A  40     2998   3436   3431    221    411    321       C  
ATOM    273  O   TRP A  40      19.443 -38.296  26.324  1.00 23.79           O  
ANISOU  273  O   TRP A  40     2708   3148   3185    156    460    356       O  
ATOM    274  CB  TRP A  40      19.695 -37.616  29.346  1.00 22.41           C  
ANISOU  274  CB  TRP A  40     2667   3009   2839    373    391    330       C  
ATOM    275  CG  TRP A  40      20.011 -36.851  30.613  1.00 25.83           C  
ANISOU  275  CG  TRP A  40     3173   3456   3185    444    338    290       C  
ATOM    276  CD1 TRP A  40      19.523 -35.628  30.981  1.00 26.56           C  
ANISOU  276  CD1 TRP A  40     3315   3535   3242    452    344    263       C  
ATOM    277  CD2 TRP A  40      20.857 -37.286  31.693  1.00 25.74           C  
ANISOU  277  CD2 TRP A  40     3206   3472   3104    515    274    276       C  
ATOM    278  CE2 TRP A  40      20.842 -36.272  32.673  1.00 23.81           C  
ANISOU  278  CE2 TRP A  40     3043   3231   2773    548    238    234       C  
ATOM    279  CE3 TRP A  40      21.631 -38.432  31.917  1.00 28.84           C  
ANISOU  279  CE3 TRP A  40     3579   3882   3496    556    244    299       C  
ATOM    280  NE1 TRP A  40      20.024 -35.271  32.217  1.00 24.15           N  
ANISOU  280  NE1 TRP A  40     3092   3244   2841    511    290    224       N  
ATOM    281  CZ2 TRP A  40      21.570 -36.370  33.868  1.00 25.37           C  
ANISOU  281  CZ2 TRP A  40     3305   3459   2874    608    160    213       C  
ATOM    282  CZ3 TRP A  40      22.353 -38.531  33.104  1.00 28.22           C  
ANISOU  282  CZ3 TRP A  40     3553   3838   3333    629    165    288       C  
ATOM    283  CH2 TRP A  40      22.320 -37.499  34.060  1.00 27.45           C  
ANISOU  283  CH2 TRP A  40     3537   3752   3140    648    117    244       C  
ATOM    284  N   SER A  41      21.219 -39.467  27.035  1.00 24.89           N  
ANISOU  284  N   SER A  41     2845   3296   3316    237    410    323       N  
ATOM    285  CA  SER A  41      20.977 -40.534  26.071  1.00 24.69           C  
ANISOU  285  CA  SER A  41     2804   3238   3339    173    485    361       C  
ATOM    286  C   SER A  41      21.295 -41.907  26.659  1.00 31.17           C  
ANISOU  286  C   SER A  41     3657   4045   4140    247    521    402       C  
ATOM    287  O   SER A  41      22.078 -42.022  27.607  1.00 26.48           O  
ANISOU  287  O   SER A  41     3072   3473   3515    342    466    392       O  
ATOM    288  CB  SER A  41      21.791 -40.309  24.794  1.00 23.28           C  
ANISOU  288  CB  SER A  41     2567   3040   3237     76    476    310       C  
ATOM    289  OG  SER A  41      23.177 -40.233  25.074  1.00 24.72           O  
ANISOU  289  OG  SER A  41     2712   3237   3444    118    417    258       O  
ATOM    290  N   CYS A  42      20.663 -42.935  26.097  1.00 28.80           N  
ANISOU  290  N   CYS A  42     3380   3709   3855    199    610    452       N  
ATOM    291  CA  CYS A  42      20.970 -44.328  26.420  1.00 28.64           C  
ANISOU  291  CA  CYS A  42     3401   3655   3826    254    667    493       C  
ATOM    292  C   CYS A  42      20.889 -45.136  25.125  1.00 32.75           C  
ANISOU  292  C   CYS A  42     3922   4121   4401    144    753    501       C  
ATOM    293  O   CYS A  42      19.975 -44.937  24.323  1.00 32.25           O  
ANISOU  293  O   CYS A  42     3857   4053   4344     32    787    512       O  
ATOM    294  CB  CYS A  42      19.983 -44.885  27.450  1.00 27.71           C  
ANISOU  294  CB  CYS A  42     3357   3538   3633    320    712    559       C  
ATOM    295  SG  CYS A  42      20.507 -46.486  28.155  1.00 39.56           S  
ANISOU  295  SG  CYS A  42     4928   4994   5108    423    769    612       S  
ATOM    296  N   GLY A  43      21.857 -46.022  24.910  1.00 31.44           N  
ANISOU  296  N   GLY A  43     3759   3913   4273    173    789    497       N  
ATOM    297  CA  GLY A  43      21.927 -46.787  23.677  1.00 28.52           C  
ANISOU  297  CA  GLY A  43     3407   3478   3951     67    882    494       C  
ATOM    298  C   GLY A  43      22.045 -45.907  22.438  1.00 30.56           C  
ANISOU  298  C   GLY A  43     3616   3740   4257    -62    860    438       C  
ATOM    299  O   GLY A  43      21.488 -46.227  21.394  1.00 34.33           O  
ANISOU  299  O   GLY A  43     4124   4180   4740   -191    925    444       O  
ATOM    300  N   GLY A  44      22.762 -44.795  22.566  1.00 26.87           N  
ANISOU  300  N   GLY A  44     3080   3317   3814    -34    768    385       N  
ATOM    301  CA  GLY A  44      22.988 -43.868  21.471  1.00 23.80           C  
ANISOU  301  CA  GLY A  44     2647   2928   3467   -146    744    330       C  
ATOM    302  C   GLY A  44      21.782 -43.011  21.117  1.00 24.45           C  
ANISOU  302  C   GLY A  44     2736   3038   3515   -230    718    345       C  
ATOM    303  O   GLY A  44      21.830 -42.252  20.151  1.00 23.59           O  
ANISOU  303  O   GLY A  44     2606   2925   3433   -330    701    310       O  
ATOM    304  N   ARG A  45      20.709 -43.115  21.897  1.00 24.40           N  
ANISOU  304  N   ARG A  45     2758   3058   3454   -187    719    401       N  
ATOM    305  CA  ARG A  45      19.463 -42.424  21.574  1.00 29.67           C  
ANISOU  305  CA  ARG A  45     3419   3753   4099   -256    707    433       C  
ATOM    306  C   ARG A  45      19.015 -41.447  22.657  1.00 30.60           C  
ANISOU  306  C   ARG A  45     3526   3920   4182   -160    648    441       C  
ATOM    307  O   ARG A  45      19.024 -41.774  23.840  1.00 29.71           O  
ANISOU  307  O   ARG A  45     3440   3820   4029    -50    647    458       O  
ATOM    308  CB  ARG A  45      18.358 -43.439  21.270  1.00 27.56           C  
ANISOU  308  CB  ARG A  45     3192   3472   3807   -326    784    500       C  
ATOM    309  CG  ARG A  45      18.743 -44.364  20.134  1.00 29.37           C  
ANISOU  309  CG  ARG A  45     3458   3643   4061   -439    852    487       C  
ATOM    310  CD  ARG A  45      17.690 -45.394  19.776  1.00 30.97           C  
ANISOU  310  CD  ARG A  45     3710   3826   4230   -533    929    546       C  
ATOM    311  NE  ARG A  45      18.303 -46.443  18.964  1.00 30.25           N  
ANISOU  311  NE  ARG A  45     3682   3659   4154   -610   1013    524       N  
ATOM    312  CZ  ARG A  45      18.500 -46.364  17.651  1.00 30.83           C  
ANISOU  312  CZ  ARG A  45     3772   3701   4242   -752   1031    493       C  
ATOM    313  NH1 ARG A  45      19.084 -47.364  17.010  1.00 29.04           N1+
ANISOU  313  NH1 ARG A  45     3616   3392   4025   -811   1125    471       N1+
ATOM    314  NH2 ARG A  45      18.118 -45.288  16.976  1.00 30.35           N  
ANISOU  314  NH2 ARG A  45     3665   3682   4184   -832    960    487       N  
ATOM    315  N   LYS A  46      18.612 -40.250  22.242  1.00 27.60           N  
ANISOU  315  N   LYS A  46     3116   3560   3812   -203    606    430       N  
ATOM    316  CA  LYS A  46      18.187 -39.222  23.182  1.00 27.81           C  
ANISOU  316  CA  LYS A  46     3142   3617   3807   -117    565    432       C  
ATOM    317  C   LYS A  46      16.975 -39.656  24.000  1.00 30.29           C  
ANISOU  317  C   LYS A  46     3478   3951   4079    -62    613    507       C  
ATOM    318  O   LYS A  46      16.001 -40.185  23.457  1.00 29.46           O  
ANISOU  318  O   LYS A  46     3361   3851   3982   -132    661    567       O  
ATOM    319  CB  LYS A  46      17.856 -37.939  22.434  1.00 29.24           C  
ANISOU  319  CB  LYS A  46     3294   3803   4013   -178    531    421       C  
ATOM    320  CG  LYS A  46      17.382 -36.782  23.298  1.00 28.11           C  
ANISOU  320  CG  LYS A  46     3162   3676   3842    -95    506    422       C  
ATOM    321  CD  LYS A  46      17.187 -35.550  22.412  1.00 34.13           C  
ANISOU  321  CD  LYS A  46     3902   4429   4636   -157    478    412       C  
ATOM    322  CE  LYS A  46      16.805 -34.312  23.195  1.00 43.02           C  
ANISOU  322  CE  LYS A  46     5053   5553   5739    -75    467    407       C  
ATOM    323  NZ  LYS A  46      15.746 -34.618  24.191  1.00 50.53           N1+
ANISOU  323  NZ  LYS A  46     6018   6524   6656     14    517    472       N1+
ATOM    324  N   ILE A  47      17.045 -39.427  25.310  1.00 25.03           N  
ANISOU  324  N   ILE A  47     2848   3297   3365     56    601    501       N  
ATOM    325  CA  ILE A  47      15.901 -39.630  26.182  1.00 27.00           C  
ANISOU  325  CA  ILE A  47     3124   3561   3572    117    654    565       C  
ATOM    326  C   ILE A  47      15.021 -38.385  26.179  1.00 30.56           C  
ANISOU  326  C   ILE A  47     3551   4028   4032    126    652    584       C  
ATOM    327  O   ILE A  47      15.494 -37.284  26.440  1.00 32.55           O  
ANISOU  327  O   ILE A  47     3816   4274   4276    162    605    532       O  
ATOM    328  CB  ILE A  47      16.350 -39.945  27.637  1.00 30.28           C  
ANISOU  328  CB  ILE A  47     3609   3977   3919    241    648    553       C  
ATOM    329  CG1 ILE A  47      17.090 -41.280  27.670  1.00 31.87           C  
ANISOU  329  CG1 ILE A  47     3833   4159   4117    249    663    556       C  
ATOM    330  CG2 ILE A  47      15.155 -39.957  28.582  1.00 29.97           C  
ANISOU  330  CG2 ILE A  47     3607   3947   3833    306    713    613       C  
ATOM    331  CD1 ILE A  47      17.907 -41.481  28.898  1.00 36.41           C  
ANISOU  331  CD1 ILE A  47     4463   4739   4631    363    623    536       C  
ATOM    332  N   HIS A  48      13.739 -38.565  25.881  1.00 32.55           N  
ANISOU  332  N   HIS A  48     3767   4299   4303     91    706    661       N  
ATOM    333  CA  HIS A  48      12.794 -37.455  25.856  1.00 35.32           C  
ANISOU  333  CA  HIS A  48     4081   4665   4674    111    717    699       C  
ATOM    334  C   HIS A  48      11.934 -37.415  27.124  1.00 40.86           C  
ANISOU  334  C   HIS A  48     4815   5373   5336    219    785    743       C  
ATOM    335  O   HIS A  48      11.339 -38.416  27.517  1.00 43.53           O  
ANISOU  335  O   HIS A  48     5159   5724   5658    223    846    794       O  
ATOM    336  CB  HIS A  48      11.906 -37.550  24.616  1.00 36.88           C  
ANISOU  336  CB  HIS A  48     4196   4889   4926     -1    723    766       C  
ATOM    337  CG  HIS A  48      12.669 -37.492  23.330  1.00 35.61           C  
ANISOU  337  CG  HIS A  48     4018   4715   4796   -114    666    725       C  
ATOM    338  CD2 HIS A  48      13.269 -38.462  22.598  1.00 36.38           C  
ANISOU  338  CD2 HIS A  48     4127   4798   4896   -208    662    702       C  
ATOM    339  ND1 HIS A  48      12.916 -36.307  22.674  1.00 40.64           N  
ANISOU  339  ND1 HIS A  48     4637   5342   5461   -137    615    699       N  
ATOM    340  CE1 HIS A  48      13.617 -36.549  21.579  1.00 39.39           C  
ANISOU  340  CE1 HIS A  48     4476   5168   5321   -246    581    663       C  
ATOM    341  NE2 HIS A  48      13.849 -37.849  21.512  1.00 37.84           N  
ANISOU  341  NE2 HIS A  48     4298   4968   5111   -289    611    662       N  
ATOM    342  N   SER A  49      11.885 -36.254  27.767  1.00 39.20           N  
ANISOU  342  N   SER A  49     4638   5148   5109    301    785    719       N  
ATOM    343  CA  SER A  49      11.068 -36.093  28.953  1.00 43.19           C  
ANISOU  343  CA  SER A  49     5186   5649   5575    404    864    756       C  
ATOM    344  C   SER A  49       9.616 -36.268  28.544  1.00 46.82           C  
ANISOU  344  C   SER A  49     5554   6143   6093    379    935    861       C  
ATOM    345  O   SER A  49       9.140 -35.603  27.624  1.00 50.04           O  
ANISOU  345  O   SER A  49     5881   6567   6566    334    916    897       O  
ATOM    346  CB  SER A  49      11.292 -34.720  29.575  1.00 42.11           C  
ANISOU  346  CB  SER A  49     5112   5478   5411    483    859    706       C  
ATOM    347  OG  SER A  49      10.660 -34.638  30.834  1.00 46.23           O  
ANISOU  347  OG  SER A  49     5702   5984   5879    585    944    728       O  
ATOM    348  N   GLN A  50       8.918 -37.174  29.214  1.00 61.38           N  
ANISOU  348  N   GLN A  50     4764   8544  10014    394    351   2177       N  
ATOM    349  CA  GLN A  50       7.548 -37.489  28.840  1.00 70.46           C  
ANISOU  349  CA  GLN A  50     5549   9603  11620    306    245   2405       C  
ATOM    350  C   GLN A  50       6.584 -37.253  29.995  1.00 76.51           C  
ANISOU  350  C   GLN A  50     5982  10194  12894    606    653   2216       C  
ATOM    351  O   GLN A  50       6.738 -37.831  31.070  1.00 76.62           O  
ANISOU  351  O   GLN A  50     6168  10313  12632    744   1126   1934       O  
ATOM    352  CB  GLN A  50       7.459 -38.935  28.350  1.00 71.74           C  
ANISOU  352  CB  GLN A  50     5879  10003  11376     48    261   2497       C  
ATOM    353  CG  GLN A  50       8.094 -39.947  29.290  1.00 69.11           C  
ANISOU  353  CG  GLN A  50     5854   9864  10543    168    703   2203       C  
ATOM    354  CD  GLN A  50       8.736 -41.103  28.551  1.00 70.88           C  
ANISOU  354  CD  GLN A  50     6381  10304  10245   -113    622   2246       C  
ATOM    355  NE2 GLN A  50       8.482 -42.320  29.018  1.00 72.09           N  
ANISOU  355  NE2 GLN A  50     6620  10573  10199   -114    884   2167       N  
ATOM    356  OE1 GLN A  50       9.454 -40.904  27.569  1.00 72.58           O  
ANISOU  356  OE1 GLN A  50     6762  10566  10248   -353    350   2329       O  
ATOM    357  N   GLU A  51       5.592 -36.399  29.765  1.00 79.94           N  
ANISOU  357  N   GLU A  51     5944  10334  14097    671    463   2367       N  
ATOM    358  CA  GLU A  51       4.598 -36.085  30.783  1.00 82.19           C  
ANISOU  358  CA  GLU A  51     5831  10397  15000    930    897   2145       C  
ATOM    359  C   GLU A  51       3.917 -37.340  31.327  1.00 83.23           C  
ANISOU  359  C   GLU A  51     5938  10689  14996    887   1309   2040       C  
ATOM    360  O   GLU A  51       3.638 -37.432  32.522  1.00 83.51           O  
ANISOU  360  O   GLU A  51     5961  10691  15077   1047   1886   1700       O  
ATOM    361  CB  GLU A  51       3.550 -35.114  30.229  1.00 85.66           C  
ANISOU  361  CB  GLU A  51     5671  10448  16426    970    536   2380       C  
ATOM    362  N   GLN A  52       3.667 -38.311  30.452  1.00 85.53           N  
ANISOU  362  N   GLN A  52     6267  11152  15078    625   1024   2324       N  
ATOM    363  CA  GLN A  52       2.877 -39.482  30.825  1.00 90.26           C  
ANISOU  363  CA  GLN A  52     6787  11873  15633    554   1342   2282       C  
ATOM    364  C   GLN A  52       3.670 -40.791  30.909  1.00 86.61           C  
ANISOU  364  C   GLN A  52     6857  11752  14300    404   1473   2222       C  
ATOM    365  O   GLN A  52       3.086 -41.857  31.113  1.00 90.08           O  
ANISOU  365  O   GLN A  52     7289  12307  14629    303   1678   2224       O  
ATOM    366  CB  GLN A  52       1.688 -39.647  29.870  1.00 95.68           C  
ANISOU  366  CB  GLN A  52     7007  12432  16914    370    947   2651       C  
ATOM    367  N   GLY A  53       4.989 -40.716  30.763  1.00 78.35           N  
ANISOU  367  N   GLY A  53     6243  10836  12692    388   1354   2161       N  
ATOM    368  CA  GLY A  53       5.822 -41.907  30.831  1.00 69.72           C  
ANISOU  368  CA  GLY A  53     5602   9998  10891    269   1450   2087       C  
ATOM    369  C   GLY A  53       6.556 -42.049  32.153  1.00 60.40           C  
ANISOU  369  C   GLY A  53     4751   8861   9336    453   1854   1757       C  
ATOM    370  O   GLY A  53       6.195 -41.413  33.139  1.00 57.13           O  
ANISOU  370  O   GLY A  53     4234   8311   9162    631   2175   1554       O  
ATOM    371  N   ARG A  54       7.594 -42.880  32.171  1.00 55.55           N  
ANISOU  371  N   ARG A  54     4540   8407   8160    378   1829   1699       N  
ATOM    372  CA  ARG A  54       8.387 -43.095  33.379  1.00 54.11           C  
ANISOU  372  CA  ARG A  54     4716   8242   7602    499   2090   1446       C  
ATOM    373  C   ARG A  54       9.660 -42.253  33.414  1.00 49.75           C  
ANISOU  373  C   ARG A  54     4357   7651   6895    604   1931   1346       C  
ATOM    374  O   ARG A  54      10.274 -42.095  34.466  1.00 48.50           O  
ANISOU  374  O   ARG A  54     4463   7455   6512    710   2098   1153       O  
ATOM    375  CB  ARG A  54       8.747 -44.575  33.534  1.00 52.08           C  
ANISOU  375  CB  ARG A  54     4755   8120   6915    370   2132   1445       C  
ATOM    376  CG  ARG A  54       7.576 -45.448  33.935  1.00 52.76           C  
ANISOU  376  CG  ARG A  54     4749   8240   7056    276   2386   1477       C  
ATOM    377  CD  ARG A  54       8.019 -46.872  34.199  1.00 52.93           C  
ANISOU  377  CD  ARG A  54     5108   8355   6648    155   2404   1471       C  
ATOM    378  NE  ARG A  54       8.712 -47.450  33.052  1.00 52.94           N  
ANISOU  378  NE  ARG A  54     5160   8429   6524     39   2101   1585       N  
ATOM    379  CZ  ARG A  54      10.001 -47.772  33.046  1.00 49.49           C  
ANISOU  379  CZ  ARG A  54     4987   7983   5836     59   1965   1497       C  
ATOM    380  NH1 ARG A  54      10.738 -47.573  34.129  1.00 47.29           N1+
ANISOU  380  NH1 ARG A  54     4957   7624   5387    191   2024   1349       N1+
ATOM    381  NH2 ARG A  54      10.548 -48.298  31.960  1.00 48.51           N  
ANISOU  381  NH2 ARG A  54     4874   7905   5654    -84   1777   1545       N  
ATOM    382  N   PHE A  55      10.053 -41.716  32.264  1.00 41.73           N  
ANISOU  382  N   PHE A  55     3238   6640   5979    530   1596   1488       N  
ATOM    383  CA  PHE A  55      11.284 -40.941  32.173  1.00 40.10           C  
ANISOU  383  CA  PHE A  55     3199   6407   5631    592   1437   1398       C  
ATOM    384  C   PHE A  55      10.999 -39.452  32.164  1.00 43.60           C  
ANISOU  384  C   PHE A  55     3429   6685   6453    717   1363   1409       C  
ATOM    385  O   PHE A  55      10.171 -38.980  31.391  1.00 50.00           O  
ANISOU  385  O   PHE A  55     3935   7414   7647    646   1176   1605       O  
ATOM    386  CB  PHE A  55      12.061 -41.330  30.913  1.00 39.77           C  
ANISOU  386  CB  PHE A  55     3244   6471   5397    366   1157   1499       C  
ATOM    387  CG  PHE A  55      12.692 -42.685  30.995  1.00 43.75           C  
ANISOU  387  CG  PHE A  55     3974   7079   5568    282   1237   1413       C  
ATOM    388  CD1 PHE A  55      11.932 -43.828  30.813  1.00 48.13           C  
ANISOU  388  CD1 PHE A  55     4498   7707   6083    154   1319   1505       C  
ATOM    389  CD2 PHE A  55      14.038 -42.817  31.270  1.00 42.87           C  
ANISOU  389  CD2 PHE A  55     4082   6961   5245    334   1214   1243       C  
ATOM    390  CE1 PHE A  55      12.508 -45.076  30.896  1.00 47.35           C  
ANISOU  390  CE1 PHE A  55     4597   7661   5735     84   1378   1423       C  
ATOM    391  CE2 PHE A  55      14.623 -44.062  31.349  1.00 45.57           C  
ANISOU  391  CE2 PHE A  55     4579   7333   5400    274   1256   1163       C  
ATOM    392  CZ  PHE A  55      13.855 -45.192  31.162  1.00 48.73           C  
ANISOU  392  CZ  PHE A  55     4961   7794   5760    152   1340   1251       C  
ATOM    393  N   HIS A  56      11.689 -38.707  33.019  1.00 35.91           N  
ANISOU  393  N   HIS A  56     2618   5630   5398    887   1472   1212       N  
ATOM    394  CA  HIS A  56      11.484 -37.268  33.085  1.00 34.76           C  
ANISOU  394  CA  HIS A  56     2289   5296   5624   1018   1424   1189       C  
ATOM    395  C   HIS A  56      12.806 -36.560  33.256  1.00 35.80           C  
ANISOU  395  C   HIS A  56     2673   5415   5516   1075   1304   1070       C  
ATOM    396  O   HIS A  56      13.717 -37.073  33.914  1.00 33.93           O  
ANISOU  396  O   HIS A  56     2748   5257   4887   1092   1391    926       O  
ATOM    397  CB  HIS A  56      10.540 -36.910  34.233  1.00 43.96           C  
ANISOU  397  CB  HIS A  56     3321   6303   7080   1179   1831   1005       C  
ATOM    398  CG  HIS A  56       9.233 -37.635  34.182  1.00 49.76           C  
ANISOU  398  CG  HIS A  56     3781   7042   8083   1121   2004   1085       C  
ATOM    399  CD2 HIS A  56       8.907 -38.910  34.502  1.00 51.73           C  
ANISOU  399  CD2 HIS A  56     4150   7438   8067   1018   2198   1077       C  
ATOM    400  ND1 HIS A  56       8.070 -37.042  33.741  1.00 54.93           N  
ANISOU  400  ND1 HIS A  56     3959   7512   9401   1158   1954   1203       N  
ATOM    401  CE1 HIS A  56       7.080 -37.916  33.806  1.00 56.93           C  
ANISOU  401  CE1 HIS A  56     4033   7810   9787   1082   2134   1250       C  
ATOM    402  NE2 HIS A  56       7.562 -39.059  34.260  1.00 54.99           N  
ANISOU  402  NE2 HIS A  56     4163   7777   8954    990   2295   1174       N  
ATOM    403  N   ILE A  57      12.914 -35.375  32.668  1.00 29.86           N  
ANISOU  403  N   ILE A  57     1779   4538   5029   1090   1066   1150       N  
ATOM    404  CA  ILE A  57      14.130 -34.590  32.796  1.00 31.38           C  
ANISOU  404  CA  ILE A  57     2186   4706   5029   1132    947   1042       C  
ATOM    405  C   ILE A  57      13.785 -33.172  33.225  1.00 35.49           C  
ANISOU  405  C   ILE A  57     2566   4983   5936   1303    982    969       C  
ATOM    406  O   ILE A  57      12.877 -32.552  32.678  1.00 35.90           O  
ANISOU  406  O   ILE A  57     2291   4870   6479   1309    845   1122       O  
ATOM    407  CB  ILE A  57      14.950 -34.579  31.484  1.00 30.90           C  
ANISOU  407  CB  ILE A  57     2182   4754   4805    899    587   1193       C  
ATOM    408  CG1 ILE A  57      15.404 -35.993  31.116  1.00 30.01           C  
ANISOU  408  CG1 ILE A  57     2211   4845   4344    732    620   1190       C  
ATOM    409  CG2 ILE A  57      16.163 -33.689  31.617  1.00 27.81           C  
ANISOU  409  CG2 ILE A  57     1972   4324   4270    936    478   1073       C  
ATOM    410  CD1 ILE A  57      15.890 -36.118  29.654  1.00 33.26           C  
ANISOU  410  CD1 ILE A  57     2647   5356   4635    403    352   1323       C  
ATOM    411  N   GLU A  58      14.504 -32.666  34.222  1.00 34.69           N  
ANISOU  411  N   GLU A  58     2708   4825   5647   1427   1147    739       N  
ATOM    412  CA  GLU A  58      14.272 -31.313  34.705  1.00 39.65           C  
ANISOU  412  CA  GLU A  58     3245   5202   6619   1580   1228    618       C  
ATOM    413  C   GLU A  58      15.560 -30.515  34.601  1.00 38.53           C  
ANISOU  413  C   GLU A  58     3334   5055   6249   1569    999    577       C  
ATOM    414  O   GLU A  58      16.557 -30.856  35.234  1.00 36.43           O  
ANISOU  414  O   GLU A  58     3396   4896   5549   1556   1056    440       O  
ATOM    415  CB  GLU A  58      13.779 -31.340  36.151  1.00 45.70           C  
ANISOU  415  CB  GLU A  58     4120   5864   7378   1693   1728    328       C  
ATOM    416  CG  GLU A  58      13.498 -29.968  36.742  1.00 62.87           C  
ANISOU  416  CG  GLU A  58     6207   7744   9937   1837   1912    130       C  
ATOM    417  CD  GLU A  58      12.183 -29.368  36.259  1.00 76.62           C  
ANISOU  417  CD  GLU A  58     7417   9229  12465   1936   1929    206       C  
ATOM    418  OE1 GLU A  58      11.533 -29.972  35.377  1.00 81.35           O  
ANISOU  418  OE1 GLU A  58     7735   9897  13278   1867   1723    461       O  
ATOM    419  OE2 GLU A  58      11.798 -28.288  36.764  1.00 80.75           O1-
ANISOU  419  OE2 GLU A  58     7793   9453  13436   2071   2136      8       O1-
ATOM    420  N   ASN A  59      15.543 -29.459  33.793  1.00 39.60           N  
ANISOU  420  N   ASN A  59     3296   5049   6702   1552    700    716       N  
ATOM    421  CA  ASN A  59      16.737 -28.651  33.569  1.00 37.71           C  
ANISOU  421  CA  ASN A  59     3257   4805   6266   1506    463    695       C  
ATOM    422  C   ASN A  59      16.586 -27.238  34.090  1.00 37.07           C  
ANISOU  422  C   ASN A  59     3127   4435   6524   1665    506    576       C  
ATOM    423  O   ASN A  59      15.548 -26.616  33.902  1.00 38.62           O  
ANISOU  423  O   ASN A  59     3003   4388   7282   1751    491    645       O  
ATOM    424  CB  ASN A  59      17.070 -28.579  32.078  1.00 37.53           C  
ANISOU  424  CB  ASN A  59     3170   4868   6223   1256     35    961       C  
ATOM    425  CG  ASN A  59      17.336 -29.936  31.473  1.00 37.17           C  
ANISOU  425  CG  ASN A  59     3195   5091   5838   1056     19   1036       C  
ATOM    426  ND2 ASN A  59      18.098 -30.753  32.175  1.00 31.65           N  
ANISOU  426  ND2 ASN A  59     2710   4538   4776   1105    221    851       N  
ATOM    427  OD1 ASN A  59      16.858 -30.247  30.381  1.00 41.77           O  
ANISOU  427  OD1 ASN A  59     3650   5721   6500    836   -195   1264       O  
ATOM    428  N   THR A  60      17.632 -26.730  34.734  1.00 40.95           N  
ANISOU  428  N   THR A  60     3916   4924   6720   1698    542    398       N  
ATOM    429  CA  THR A  60      17.706 -25.313  35.065  1.00 45.35           C  
ANISOU  429  CA  THR A  60     4472   5211   7550   1806    523    294       C  
ATOM    430  C   THR A  60      19.026 -24.756  34.537  1.00 48.41           C  
ANISOU  430  C   THR A  60     5064   5675   7654   1679    181    356       C  
ATOM    431  O   THR A  60      19.756 -25.443  33.814  1.00 49.25           O  
ANISOU  431  O   THR A  60     5250   6022   7441   1499    -16    473       O  
ATOM    432  CB  THR A  60      17.719 -25.083  36.572  1.00 46.51           C  
ANISOU  432  CB  THR A  60     4851   5243   7576   1931    958    -42       C  
ATOM    433  CG2 THR A  60      16.631 -25.908  37.244  1.00 47.97           C  
ANISOU  433  CG2 THR A  60     4939   5426   7861   1980   1383   -161       C  
ATOM    434  OG1 THR A  60      19.003 -25.451  37.089  1.00 46.34           O  
ANISOU  434  OG1 THR A  60     5233   5406   6966   1841    912   -129       O  
ATOM    435  N   ASP A  61      19.338 -23.518  34.906  1.00 47.91           N  
ANISOU  435  N   ASP A  61     5080   5395   7728   1755    148    249       N  
ATOM    436  CA  ASP A  61      20.535 -22.849  34.405  1.00 48.51           C  
ANISOU  436  CA  ASP A  61     5332   5515   7586   1622   -173    304       C  
ATOM    437  C   ASP A  61      21.847 -23.443  34.929  1.00 45.95           C  
ANISOU  437  C   ASP A  61     5327   5418   6713   1550   -131    167       C  
ATOM    438  O   ASP A  61      22.923 -23.113  34.420  1.00 49.75           O  
ANISOU  438  O   ASP A  61     5916   5980   7006   1406   -379    205       O  
ATOM    439  CB  ASP A  61      20.481 -21.347  34.697  1.00 57.46           C  
ANISOU  439  CB  ASP A  61     6466   6327   9041   1725   -226    225       C  
ATOM    440  CG  ASP A  61      19.570 -20.599  33.741  1.00 69.56           C  
ANISOU  440  CG  ASP A  61     7663   7605  11161   1715   -516    466       C  
ATOM    441  OD1 ASP A  61      19.798 -19.389  33.529  1.00 78.67           O  
ANISOU  441  OD1 ASP A  61     8826   8524  12541   1710   -745    503       O  
ATOM    442  OD2 ASP A  61      18.630 -21.214  33.195  1.00 71.08           O1-
ANISOU  442  OD2 ASP A  61     7588   7811  11608   1695   -558    640       O1-
ATOM    443  N   ASP A  62      21.770 -24.316  35.932  1.00 35.01           N  
ANISOU  443  N   ASP A  62     4086   4112   5102   1622    156     16       N  
ATOM    444  CA  ASP A  62      22.991 -24.903  36.481  1.00 37.41           C  
ANISOU  444  CA  ASP A  62     4672   4572   4971   1549    115    -76       C  
ATOM    445  C   ASP A  62      22.823 -26.337  36.986  1.00 35.87           C  
ANISOU  445  C   ASP A  62     4547   4526   4555   1541    279    -96       C  
ATOM    446  O   ASP A  62      23.700 -26.872  37.653  1.00 34.47           O  
ANISOU  446  O   ASP A  62     4608   4410   4079   1491    230   -164       O  
ATOM    447  CB  ASP A  62      23.560 -24.015  37.592  1.00 45.35           C  
ANISOU  447  CB  ASP A  62     5981   5417   5831   1589    177   -267       C  
ATOM    448  CG  ASP A  62      22.595 -23.844  38.742  1.00 59.83           C  
ANISOU  448  CG  ASP A  62     7935   7076   7722   1686    571   -455       C  
ATOM    449  OD1 ASP A  62      21.445 -24.318  38.617  1.00 61.75           O  
ANISOU  449  OD1 ASP A  62     7961   7308   8195   1751    791   -433       O  
ATOM    450  OD2 ASP A  62      22.977 -23.231  39.767  1.00 69.69           O1-
ANISOU  450  OD2 ASP A  62     9501   8190   8788   1663    684   -642       O1-
ATOM    451  N   LEU A  63      21.709 -26.967  36.646  1.00 34.88           N  
ANISOU  451  N   LEU A  63     4622   4653   3977   1550    298   -232       N  
ATOM    452  CA  LEU A  63      21.431 -28.313  37.119  1.00 32.89           C  
ANISOU  452  CA  LEU A  63     4289   4476   3729   1573    395   -190       C  
ATOM    453  C   LEU A  63      20.558 -29.042  36.117  1.00 29.55           C  
ANISOU  453  C   LEU A  63     3762   4109   3358   1497    467   -124       C  
ATOM    454  O   LEU A  63      19.639 -28.459  35.547  1.00 29.53           O  
ANISOU  454  O   LEU A  63     3744   4118   3360   1512    468   -101       O  
ATOM    455  CB  LEU A  63      20.701 -28.250  38.470  1.00 33.82           C  
ANISOU  455  CB  LEU A  63     4447   4637   3767   1741    435   -181       C  
ATOM    456  CG  LEU A  63      20.485 -29.553  39.255  1.00 31.63           C  
ANISOU  456  CG  LEU A  63     4128   4428   3463   1765    521   -138       C  
ATOM    457  CD1 LEU A  63      21.805 -30.146  39.670  1.00 31.53           C  
ANISOU  457  CD1 LEU A  63     4151   4369   3458   1730    483   -179       C  
ATOM    458  CD2 LEU A  63      19.589 -29.322  40.502  1.00 34.17           C  
ANISOU  458  CD2 LEU A  63     4481   4814   3689   1924    568   -125       C  
ATOM    459  N   THR A  64      20.852 -30.316  35.892  1.00 27.92           N  
ANISOU  459  N   THR A  64     3494   3931   3183   1422    515    -98       N  
ATOM    460  CA  THR A  64      19.932 -31.182  35.178  1.00 29.25           C  
ANISOU  460  CA  THR A  64     3578   4153   3382   1358    586    -25       C  
ATOM    461  C   THR A  64      19.649 -32.411  36.024  1.00 30.43           C  
ANISOU  461  C   THR A  64     3720   4352   3490   1385    651     21       C  
ATOM    462  O   THR A  64      20.561 -32.970  36.631  1.00 32.69           O  
ANISOU  462  O   THR A  64     4053   4608   3760   1399    631    -12       O  
ATOM    463  CB  THR A  64      20.461 -31.615  33.772  1.00 29.17           C  
ANISOU  463  CB  THR A  64     3520   4117   3447   1208    570    -26       C  
ATOM    464  CG2 THR A  64      21.850 -32.207  33.861  1.00 25.61           C  
ANISOU  464  CG2 THR A  64     3083   3641   3005   1171    536    -81       C  
ATOM    465  OG1 THR A  64      19.581 -32.602  33.232  1.00 30.08           O  
ANISOU  465  OG1 THR A  64     3570   4278   3581   1150    635     49       O  
ATOM    466  N   THR A  65      18.387 -32.827  36.068  1.00 29.19           N  
ANISOU  466  N   THR A  65     3508   4275   3307   1386    723     96       N  
ATOM    467  CA  THR A  65      18.009 -34.007  36.841  1.00 32.85           C  
ANISOU  467  CA  THR A  65     3977   4789   3715   1380    783    153       C  
ATOM    468  C   THR A  65      17.249 -35.031  36.011  1.00 32.55           C  
ANISOU  468  C   THR A  65     3876   4793   3698   1254    830    237       C  
ATOM    469  O   THR A  65      16.178 -34.745  35.480  1.00 31.51           O  
ANISOU  469  O   THR A  65     3663   4735   3573   1230    866    284       O  
ATOM    470  CB  THR A  65      17.149 -33.638  38.076  1.00 34.77           C  
ANISOU  470  CB  THR A  65     4224   5124   3863   1499    833    173       C  
ATOM    471  CG2 THR A  65      16.855 -34.872  38.905  1.00 38.88           C  
ANISOU  471  CG2 THR A  65     4769   5693   4311   1467    889    237       C  
ATOM    472  OG1 THR A  65      17.846 -32.685  38.877  1.00 27.84           O  
ANISOU  472  OG1 THR A  65     3424   4196   2959   1621    781     95       O  
ATOM    473  N   LEU A  66      17.821 -36.223  35.905  1.00 29.17           N  
ANISOU  473  N   LEU A  66     3495   4314   3274   1180    818    252       N  
ATOM    474  CA  LEU A  66      17.165 -37.347  35.257  1.00 30.04           C  
ANISOU  474  CA  LEU A  66     3583   4446   3386   1054    849    336       C  
ATOM    475  C   LEU A  66      16.341 -38.120  36.279  1.00 33.44           C  
ANISOU  475  C   LEU A  66     4039   4951   3716   1040    905    416       C  
ATOM    476  O   LEU A  66      16.859 -38.518  37.328  1.00 35.81           O  
ANISOU  476  O   LEU A  66     4432   5219   3954   1093    893    400       O  
ATOM    477  CB  LEU A  66      18.206 -38.284  34.637  1.00 24.26           C  
ANISOU  477  CB  LEU A  66     2914   3613   2691    993    792    307       C  
ATOM    478  CG  LEU A  66      17.680 -39.559  33.964  1.00 29.98           C  
ANISOU  478  CG  LEU A  66     3658   4326   3408    864    801    387       C  
ATOM    479  CD1 LEU A  66      16.839 -39.247  32.728  1.00 30.27           C  
ANISOU  479  CD1 LEU A  66     3594   4403   3503    772    825    432       C  
ATOM    480  CD2 LEU A  66      18.817 -40.491  33.601  1.00 28.07           C  
ANISOU  480  CD2 LEU A  66     3507   3981   3178    853    732    338       C  
ATOM    481  N   ILE A  67      15.066 -38.342  35.978  1.00 31.36           N  
ANISOU  481  N   ILE A  67     3694   4793   3428    960    965    504       N  
ATOM    482  CA  ILE A  67      14.201 -39.124  36.855  1.00 33.00           C  
ANISOU  482  CA  ILE A  67     3913   5099   3527    906   1024    593       C  
ATOM    483  C   ILE A  67      13.629 -40.332  36.130  1.00 39.34           C  
ANISOU  483  C   ILE A  67     4724   5904   4320    724   1028    690       C  
ATOM    484  O   ILE A  67      13.097 -40.209  35.020  1.00 34.19           O  
ANISOU  484  O   ILE A  67     3983   5278   3728    651   1032    717       O  
ATOM    485  CB  ILE A  67      13.036 -38.288  37.378  1.00 37.64           C  
ANISOU  485  CB  ILE A  67     4379   5865   4058    973   1099    616       C  
ATOM    486  CG1 ILE A  67      13.555 -37.032  38.075  1.00 39.78           C  
ANISOU  486  CG1 ILE A  67     4665   6121   4330   1161   1082    518       C  
ATOM    487  CG2 ILE A  67      12.157 -39.117  38.313  1.00 40.83           C  
ANISOU  487  CG2 ILE A  67     4782   6399   4331    896   1169    711       C  
ATOM    488  CD1 ILE A  67      12.477 -36.299  38.844  1.00 43.81           C  
ANISOU  488  CD1 ILE A  67     5082   6810   4755   1264   1151    528       C  
ATOM    489  N   ILE A  68      13.754 -41.501  36.753  1.00 35.76           N  
ANISOU  489  N   ILE A  68     4395   5410   3784    649   1016    743       N  
ATOM    490  CA  ILE A  68      13.168 -42.718  36.213  1.00 40.41           C  
ANISOU  490  CA  ILE A  68     5027   5992   4336    462   1008    846       C  
ATOM    491  C   ILE A  68      12.268 -43.329  37.266  1.00 46.18           C  
ANISOU  491  C   ILE A  68     5782   6842   4923    371   1065    946       C  
ATOM    492  O   ILE A  68      12.734 -43.760  38.326  1.00 46.26           O  
ANISOU  492  O   ILE A  68     5924   6803   4850    403   1048    942       O  
ATOM    493  CB  ILE A  68      14.227 -43.749  35.800  1.00 43.68           C  
ANISOU  493  CB  ILE A  68     5613   6214   4768    430    910    820       C  
ATOM    494  CG1 ILE A  68      15.201 -43.145  34.780  1.00 41.80           C  
ANISOU  494  CG1 ILE A  68     5340   5885   4659    516    860    713       C  
ATOM    495  CG2 ILE A  68      13.561 -44.977  35.193  1.00 45.70           C  
ANISOU  495  CG2 ILE A  68     5937   6448   4978    233    888    929       C  
ATOM    496  CD1 ILE A  68      16.333 -44.078  34.408  1.00 39.19           C  
ANISOU  496  CD1 ILE A  68     5159   5392   4338    523    765    663       C  
ATOM    497  N   MET A  69      10.973 -43.347  36.980  1.00 47.46           N  
ANISOU  497  N   MET A  69     5811   7172   5048    253   1131   1037       N  
ATOM    498  CA  MET A  69       9.995 -43.827  37.944  1.00 50.76           C  
ANISOU  498  CA  MET A  69     6215   7757   5317    146   1200   1137       C  
ATOM    499  C   MET A  69       9.817 -45.329  37.818  1.00 51.00           C  
ANISOU  499  C   MET A  69     6402   7712   5264    -78   1152   1247       C  
ATOM    500  O   MET A  69       9.845 -45.871  36.715  1.00 51.36           O  
ANISOU  500  O   MET A  69     6481   7663   5369   -183   1095   1274       O  
ATOM    501  CB  MET A  69       8.664 -43.103  37.754  1.00 50.44           C  
ANISOU  501  CB  MET A  69     5936   7969   5259    130   1293   1176       C  
ATOM    502  CG  MET A  69       8.749 -41.619  38.053  1.00 50.53           C  
ANISOU  502  CG  MET A  69     5824   8055   5320    365   1330   1069       C  
ATOM    503  SD  MET A  69       7.160 -40.785  37.953  1.00107.26           S  
ANISOU  503  SD  MET A  69    12737  15556  12460    388   1429   1099       S  
ATOM    504  CE  MET A  69       6.524 -41.455  36.423  1.00 43.43           C  
ANISOU  504  CE  MET A  69     4587   7470   4444    176   1399   1185       C  
ATOM    505  N   ASP A  70       9.662 -45.995  38.960  1.00 50.25           N  
ANISOU  505  N   ASP A  70     6422   7648   5023   -152   1166   1309       N  
ATOM    506  CA AASP A  70       9.436 -47.435  38.977  0.53 53.52           C  
ANISOU  506  CA AASP A  70     7020   7987   5327   -381   1109   1424       C  
ATOM    507  CA BASP A  70       9.446 -47.434  38.991  0.47 53.56           C  
ANISOU  507  CA BASP A  70     7026   7991   5332   -380   1109   1423       C  
ATOM    508  C   ASP A  70      10.481 -48.159  38.144  1.00 52.90           C  
ANISOU  508  C   ASP A  70     7135   7637   5326   -373    978   1380       C  
ATOM    509  O   ASP A  70      10.139 -48.869  37.195  1.00 57.41           O  
ANISOU  509  O   ASP A  70     7747   8156   5908   -531    929   1446       O  
ATOM    510  CB AASP A  70       8.036 -47.756  38.443  0.53 56.30           C  
ANISOU  510  CB AASP A  70     7234   8533   5625   -609   1165   1551       C  
ATOM    511  CB BASP A  70       8.026 -47.766  38.522  0.47 56.69           C  
ANISOU  511  CB BASP A  70     7286   8587   5665   -610   1168   1553       C  
ATOM    512  CG AASP A  70       7.740 -49.247  38.427  0.53 58.95           C  
ANISOU  512  CG AASP A  70     7778   8788   5834   -878   1095   1682       C  
ATOM    513  CG BASP A  70       6.963 -47.144  39.414  0.47 59.24           C  
ANISOU  513  CG BASP A  70     7408   9214   5884   -617   1300   1593       C  
ATOM    514  OD1AASP A  70       8.299 -49.978  39.271  0.53 57.16           O  
ANISOU  514  OD1AASP A  70     7784   8429   5505   -901   1036   1697       O  
ATOM    515  OD1BASP A  70       7.300 -46.777  40.558  0.47 60.26           O  
ANISOU  515  OD1BASP A  70     7573   9373   5952   -491   1336   1548       O  
ATOM    516  OD2AASP A  70       6.951 -49.687  37.564  0.53 62.89           O1-
ANISOU  516  OD2AASP A  70     8221   9345   6330  -1069   1087   1771       O1-
ATOM    517  OD2BASP A  70       5.798 -47.021  38.978  0.47 59.74           O1-
ANISOU  517  OD2BASP A  70     7277   9498   5923   -741   1366   1665       O1-
ATOM    518  N   VAL A  71      11.753 -47.976  38.493  1.00 50.47           N  
ANISOU  518  N   VAL A  71     6942   7168   5066   -184    916   1266       N  
ATOM    519  CA  VAL A  71      12.842 -48.519  37.677  1.00 50.62           C  
ANISOU  519  CA  VAL A  71     7111   6959   5163   -130    795   1196       C  
ATOM    520  C   VAL A  71      12.755 -50.025  37.513  1.00 54.54           C  
ANISOU  520  C   VAL A  71     7850   7316   5555   -309    695   1286       C  
ATOM    521  O   VAL A  71      12.328 -50.740  38.416  1.00 54.13           O  
ANISOU  521  O   VAL A  71     7936   7278   5353   -435    688   1377       O  
ATOM    522  CB  VAL A  71      14.238 -48.159  38.224  1.00 51.34           C  
ANISOU  522  CB  VAL A  71     7285   6925   5298     97    741   1059       C  
ATOM    523  CG1 VAL A  71      14.416 -46.653  38.279  1.00 53.20           C  
ANISOU  523  CG1 VAL A  71     7308   7267   5637    266    818    966       C  
ATOM    524  CG2 VAL A  71      14.458 -48.784  39.594  1.00 48.43           C  
ANISOU  524  CG2 VAL A  71     7107   6508   4786     97    710   1086       C  
ATOM    525  N   GLN A  72      13.164 -50.498  36.345  1.00 56.62           N  
ANISOU  525  N   GLN A  72     8180   7444   5891   -323    610   1260       N  
ATOM    526  CA  GLN A  72      13.129 -51.915  36.039  1.00 61.55           C  
ANISOU  526  CA  GLN A  72     9058   7909   6419   -477    492   1335       C  
ATOM    527  C   GLN A  72      14.510 -52.357  35.575  1.00 59.57           C  
ANISOU  527  C   GLN A  72     8977   7438   6219   -308    362   1210       C  
ATOM    528  O   GLN A  72      15.335 -51.529  35.194  1.00 58.32           O  
ANISOU  528  O   GLN A  72     8689   7282   6187   -117    378   1082       O  
ATOM    529  CB  GLN A  72      12.075 -52.176  34.965  1.00 68.04           C  
ANISOU  529  CB  GLN A  72     9797   8799   7256   -685    511   1439       C  
ATOM    530  CG  GLN A  72      10.723 -51.570  35.317  1.00 73.42           C  
ANISOU  530  CG  GLN A  72    10249   9744   7902   -820    650   1539       C  
ATOM    531  CD  GLN A  72       9.775 -51.494  34.137  1.00 77.85           C  
ANISOU  531  CD  GLN A  72    10658  10402   8519   -971    680   1609       C  
ATOM    532  NE2 GLN A  72       8.635 -50.841  34.340  1.00 80.98           N  
ANISOU  532  NE2 GLN A  72    10817  11054   8900  -1052    800   1674       N  
ATOM    533  OE1 GLN A  72      10.059 -52.013  33.056  1.00 76.58           O  
ANISOU  533  OE1 GLN A  72    10590  10097   8411  -1006    593   1600       O  
ATOM    534  N   LYS A  73      14.767 -53.657  35.619  1.00 58.71           N  
ANISOU  534  N   LYS A  73     9160   7147   6000   -377    226   1246       N  
ATOM    535  CA  LYS A  73      16.064 -54.183  35.217  1.00 60.80           C  
ANISOU  535  CA  LYS A  73     9600   7213   6289   -198     89   1121       C  
ATOM    536  C   LYS A  73      16.438 -53.726  33.807  1.00 62.88           C  
ANISOU  536  C   LYS A  73     9710   7480   6701   -118     96   1036       C  
ATOM    537  O   LYS A  73      17.613 -53.509  33.505  1.00 61.65           O  
ANISOU  537  O   LYS A  73     9546   7263   6615     89     47    892       O  
ATOM    538  CB  LYS A  73      16.056 -55.708  35.281  1.00 65.61           C  
ANISOU  538  CB  LYS A  73    10564   7620   6745   -310    -72   1188       C  
ATOM    539  CG  LYS A  73      17.411 -56.324  35.585  1.00 68.31           C  
ANISOU  539  CG  LYS A  73    11142   7766   7046    -90   -225   1059       C  
ATOM    540  CD  LYS A  73      17.717 -56.280  37.074  1.00 67.73           C  
ANISOU  540  CD  LYS A  73    11163   7687   6883    -21   -229   1050       C  
ATOM    541  CE  LYS A  73      19.016 -57.007  37.380  1.00 69.79           C  
ANISOU  541  CE  LYS A  73    11683   7748   7088    196   -402    924       C  
ATOM    542  NZ  LYS A  73      19.171 -57.282  38.833  1.00 73.10           N1+
ANISOU  542  NZ  LYS A  73    12281   8117   7378    215   -442    946       N1+
ATOM    543  N   GLN A  74      15.430 -53.585  32.949  1.00 65.41           N  
ANISOU  543  N   GLN A  74     9905   7887   7061   -290    156   1128       N  
ATOM    544  CA  GLN A  74      15.648 -53.183  31.560  1.00 64.23           C  
ANISOU  544  CA  GLN A  74     9622   7742   7040   -246    164   1065       C  
ATOM    545  C   GLN A  74      16.128 -51.736  31.468  1.00 55.76           C  
ANISOU  545  C   GLN A  74     8281   6798   6108    -82    268    956       C  
ATOM    546  O   GLN A  74      16.643 -51.313  30.433  1.00 51.72           O  
ANISOU  546  O   GLN A  74     7671   6281   5700     -4    266    872       O  
ATOM    547  CB  GLN A  74      14.369 -53.355  30.734  1.00 69.93           C  
ANISOU  547  CB  GLN A  74    10276   8531   7764   -480    201   1197       C  
ATOM    548  CG  GLN A  74      13.180 -52.571  31.275  1.00 78.32           C  
ANISOU  548  CG  GLN A  74    11121   9813   8826   -601    341   1295       C  
ATOM    549  CD  GLN A  74      12.180 -52.191  30.200  1.00 84.71           C  
ANISOU  549  CD  GLN A  74    11746  10735   9705   -741    401   1364       C  
ATOM    550  NE2 GLN A  74      11.044 -51.646  30.618  1.00 86.31           N  
ANISOU  550  NE2 GLN A  74    11765  11141   9887   -853    510   1453       N  
ATOM    551  OE1 GLN A  74      12.426 -52.378  29.008  1.00 87.86           O  
ANISOU  551  OE1 GLN A  74    12164  11047  10170   -739    348   1331       O  
ATOM    552  N   ASP A  75      15.946 -50.982  32.550  1.00 47.74           N  
ANISOU  552  N   ASP A  75     7160   5897   5083    -39    353    960       N  
ATOM    553  CA  ASP A  75      16.379 -49.590  32.593  1.00 45.09           C  
ANISOU  553  CA  ASP A  75     6603   5670   4861    110    437    863       C  
ATOM    554  C   ASP A  75      17.874 -49.459  32.886  1.00 40.88           C  
ANISOU  554  C   ASP A  75     6125   5053   4354    323    373    713       C  
ATOM    555  O   ASP A  75      18.456 -48.396  32.686  1.00 40.17           O  
ANISOU  555  O   ASP A  75     5876   5027   4361    440    415    618       O  
ATOM    556  CB  ASP A  75      15.578 -48.802  33.634  1.00 44.69           C  
ANISOU  556  CB  ASP A  75     6423   5776   4780     87    547    920       C  
ATOM    557  CG  ASP A  75      14.094 -48.745  33.315  1.00 48.63           C  
ANISOU  557  CG  ASP A  75     6807   6411   5259   -105    624   1052       C  
ATOM    558  OD1 ASP A  75      13.730 -48.785  32.120  1.00 49.39           O  
ANISOU  558  OD1 ASP A  75     6841   6506   5418   -186    618   1075       O  
ATOM    559  OD2 ASP A  75      13.289 -48.653  34.265  1.00 49.13           O1-
ANISOU  559  OD2 ASP A  75     6834   6596   5237   -173    691   1130       O1-
ATOM    560  N   GLY A  76      18.487 -50.533  33.372  1.00 40.83           N  
ANISOU  560  N   GLY A  76     6352   4909   4254    369    262    692       N  
ATOM    561  CA  GLY A  76      19.894 -50.507  33.719  1.00 38.53           C  
ANISOU  561  CA  GLY A  76     6116   4553   3972    578    190    548       C  
ATOM    562  C   GLY A  76      20.748 -50.215  32.506  1.00 41.63           C  
ANISOU  562  C   GLY A  76     6410   4944   4464    673    165    432       C  
ATOM    563  O   GLY A  76      20.312 -50.406  31.360  1.00 43.54           O  
ANISOU  563  O   GLY A  76     6620   5179   4743    576    169    467       O  
ATOM    564  N   GLY A  77      21.966 -49.741  32.737  1.00 40.32           N  
ANISOU  564  N   GLY A  77     6189   4796   4335    853    139    293       N  
ATOM    565  CA  GLY A  77      22.865 -49.472  31.628  1.00 38.97           C  
ANISOU  565  CA  GLY A  77     5915   4650   4240    939    117    175       C  
ATOM    566  C   GLY A  77      23.576 -48.136  31.698  1.00 35.69           C  
ANISOU  566  C   GLY A  77     5289   4357   3913   1028    179     78       C  
ATOM    567  O   GLY A  77      23.503 -47.426  32.717  1.00 31.38           O  
ANISOU  567  O   GLY A  77     4695   3860   3367   1056    225     87       O  
ATOM    568  N   LEU A  78      24.280 -47.810  30.614  1.00 29.26           N  
ANISOU  568  N   LEU A  78     4362   3592   3163   1065    174    -14       N  
ATOM    569  CA  LEU A  78      25.086 -46.600  30.526  1.00 30.86           C  
ANISOU  569  CA  LEU A  78     4379   3910   3437   1128    216   -112       C  
ATOM    570  C   LEU A  78      24.257 -45.428  30.051  1.00 32.92           C  
ANISOU  570  C   LEU A  78     4483   4246   3779   1002    319    -44       C  
ATOM    571  O   LEU A  78      23.724 -45.452  28.936  1.00 33.09           O  
ANISOU  571  O   LEU A  78     4463   4270   3840    899    345     -1       O  
ATOM    572  CB  LEU A  78      26.242 -46.799  29.545  1.00 33.52           C  
ANISOU  572  CB  LEU A  78     4661   4288   3788   1211    163   -243       C  
ATOM    573  CG  LEU A  78      27.271 -47.862  29.911  1.00 35.92           C  
ANISOU  573  CG  LEU A  78     5097   4542   4009   1383     46   -348       C  
ATOM    574  CD1 LEU A  78      28.347 -47.944  28.839  1.00 31.69           C  
ANISOU  574  CD1 LEU A  78     4467   4092   3484   1464     11   -483       C  
ATOM    575  CD2 LEU A  78      27.887 -47.525  31.252  1.00 36.02           C  
ANISOU  575  CD2 LEU A  78     5116   4574   3994   1495     22   -399       C  
ATOM    576  N   TYR A  79      24.155 -44.400  30.888  1.00 29.34           N  
ANISOU  576  N   TYR A  79     3955   3848   3346   1018    369    -39       N  
ATOM    577  CA  TYR A  79      23.476 -43.169  30.507  1.00 26.54           C  
ANISOU  577  CA  TYR A  79     3464   3561   3059    932    449      5       C  
ATOM    578  C   TYR A  79      24.514 -42.083  30.287  1.00 32.07           C  
ANISOU  578  C   TYR A  79     4046   4333   3806    978    444   -102       C  
ATOM    579  O   TYR A  79      25.401 -41.878  31.120  1.00 29.53           O  
ANISOU  579  O   TYR A  79     3731   4029   3459   1079    410   -178       O  
ATOM    580  CB  TYR A  79      22.459 -42.745  31.572  1.00 29.40           C  
ANISOU  580  CB  TYR A  79     3837   3937   3396    914    504     95       C  
ATOM    581  CG  TYR A  79      21.233 -43.631  31.607  1.00 31.34           C  
ANISOU  581  CG  TYR A  79     4161   4150   3596    815    526    220       C  
ATOM    582  CD1 TYR A  79      20.019 -43.193  31.096  1.00 25.96           C  
ANISOU  582  CD1 TYR A  79     3395   3521   2946    705    593    312       C  
ATOM    583  CD2 TYR A  79      21.301 -44.918  32.129  1.00 33.00           C  
ANISOU  583  CD2 TYR A  79     4535   4280   3723    825    470    247       C  
ATOM    584  CE1 TYR A  79      18.905 -44.009  31.112  1.00 29.37           C  
ANISOU  584  CE1 TYR A  79     3884   3946   3329    594    611    429       C  
ATOM    585  CE2 TYR A  79      20.194 -45.739  32.154  1.00 33.19           C  
ANISOU  585  CE2 TYR A  79     4642   4278   3692    704    482    369       C  
ATOM    586  CZ  TYR A  79      18.999 -45.282  31.647  1.00 33.96           C  
ANISOU  586  CZ  TYR A  79     4633   4449   3823    582    556    461       C  
ATOM    587  OH  TYR A  79      17.901 -46.109  31.672  1.00 33.73           O  
ANISOU  587  OH  TYR A  79     4672   4414   3730    443    567    586       O  
ATOM    588  N   THR A  80      24.422 -41.405  29.145  1.00 28.71           N  
ANISOU  588  N   THR A  80     3519   3949   3440    891    473   -106       N  
ATOM    589  CA  THR A  80      25.345 -40.326  28.838  1.00 26.96           C  
ANISOU  589  CA  THR A  80     3192   3799   3251    893    467   -195       C  
ATOM    590  C   THR A  80      24.649 -38.981  28.960  1.00 26.08           C  
ANISOU  590  C   THR A  80     3030   3705   3176    837    510   -147       C  
ATOM    591  O   THR A  80      23.548 -38.790  28.443  1.00 29.90           O  
ANISOU  591  O   THR A  80     3502   4173   3688    759    550    -64       O  
ATOM    592  CB  THR A  80      25.957 -40.483  27.420  1.00 34.21           C  
ANISOU  592  CB  THR A  80     4046   4761   4193    835    454   -252       C  
ATOM    593  CG2 THR A  80      26.892 -39.328  27.099  1.00 30.61           C  
ANISOU  593  CG2 THR A  80     3480   4396   3755    802    449   -335       C  
ATOM    594  OG1 THR A  80      26.692 -41.711  27.356  1.00 33.14           O  
ANISOU  594  OG1 THR A  80     3965   4616   4011    923    401   -317       O  
ATOM    595  N   LEU A  81      25.291 -38.063  29.673  1.00 27.05           N  
ANISOU  595  N   LEU A  81     3129   3858   3290    885    492   -204       N  
ATOM    596  CA  LEU A  81      24.862 -36.677  29.720  1.00 24.87           C  
ANISOU  596  CA  LEU A  81     2822   3589   3037    844    508   -183       C  
ATOM    597  C   LEU A  81      25.799 -35.879  28.814  1.00 26.38           C  
ANISOU  597  C   LEU A  81     2945   3831   3250    763    478   -254       C  
ATOM    598  O   LEU A  81      27.020 -35.976  28.941  1.00 24.83           O  
ANISOU  598  O   LEU A  81     2716   3688   3031    788    440   -343       O  
ATOM    599  CB  LEU A  81      24.922 -36.142  31.160  1.00 25.43           C  
ANISOU  599  CB  LEU A  81     2941   3651   3071    944    497   -193       C  
ATOM    600  CG  LEU A  81      24.722 -34.634  31.320  1.00 27.09           C  
ANISOU  600  CG  LEU A  81     3147   3859   3288    929    486   -196       C  
ATOM    601  CD1 LEU A  81      23.389 -34.199  30.732  1.00 23.53           C  
ANISOU  601  CD1 LEU A  81     2686   3392   2863    880    526   -115       C  
ATOM    602  CD2 LEU A  81      24.840 -34.192  32.794  1.00 29.86           C  
ANISOU  602  CD2 LEU A  81     3559   4197   3592   1043    469   -214       C  
ATOM    603  N   SER A  82      25.224 -35.128  27.874  1.00 22.63           N  
ANISOU  603  N   SER A  82     2445   3346   2808    660    493   -216       N  
ATOM    604  CA  SER A  82      25.999 -34.229  27.033  1.00 19.56           C  
ANISOU  604  CA  SER A  82     2009   2999   2425    554    463   -270       C  
ATOM    605  C   SER A  82      25.536 -32.805  27.214  1.00 20.13           C  
ANISOU  605  C   SER A  82     2122   3029   2496    521    440   -244       C  
ATOM    606  O   SER A  82      24.343 -32.553  27.302  1.00 24.21           O  
ANISOU  606  O   SER A  82     2676   3495   3029    547    462   -174       O  
ATOM    607  CB  SER A  82      25.825 -34.600  25.549  1.00 24.32           C  
ANISOU  607  CB  SER A  82     2569   3616   3056    444    483   -253       C  
ATOM    608  OG  SER A  82      26.205 -35.940  25.353  1.00 35.61           O  
ANISOU  608  OG  SER A  82     3982   5071   4476    490    493   -279       O  
ATOM    609  N   LEU A  83      26.486 -31.878  27.212  1.00 19.63           N  
ANISOU  609  N   LEU A  83     2056   2995   2407    460    389   -304       N  
ATOM    610  CA  LEU A  83      26.192 -30.457  27.268  1.00 24.74           C  
ANISOU  610  CA  LEU A  83     2774   3587   3039    414    342   -289       C  
ATOM    611  C   LEU A  83      26.807 -29.776  26.036  1.00 26.39           C  
ANISOU  611  C   LEU A  83     2963   3825   3238    232    307   -314       C  
ATOM    612  O   LEU A  83      27.949 -30.040  25.698  1.00 28.52           O  
ANISOU  612  O   LEU A  83     3159   4191   3488    160    300   -376       O  
ATOM    613  CB  LEU A  83      26.792 -29.828  28.530  1.00 24.05           C  
ANISOU  613  CB  LEU A  83     2739   3491   2907    486    291   -333       C  
ATOM    614  CG  LEU A  83      26.349 -30.331  29.912  1.00 26.47           C  
ANISOU  614  CG  LEU A  83     3081   3774   3203    660    316   -318       C  
ATOM    615  CD1 LEU A  83      27.012 -29.495  31.001  1.00 25.66           C  
ANISOU  615  CD1 LEU A  83     3044   3656   3051    708    251   -366       C  
ATOM    616  CD2 LEU A  83      24.843 -30.259  30.075  1.00 25.05           C  
ANISOU  616  CD2 LEU A  83     2943   3537   3036    734    356   -240       C  
ATOM    617  N   GLY A  84      26.054 -28.894  25.386  1.00 25.78           N  
ANISOU  617  N   GLY A  84     2954   3674   3166    162    281   -267       N  
ATOM    618  CA  GLY A  84      26.584 -28.142  24.255  1.00 22.85           C  
ANISOU  618  CA  GLY A  84     2593   3316   2771    -27    238   -282       C  
ATOM    619  C   GLY A  84      26.216 -26.675  24.334  1.00 22.13           C  
ANISOU  619  C   GLY A  84     2645   3120   2643    -71    152   -261       C  
ATOM    620  O   GLY A  84      25.079 -26.326  24.667  1.00 23.53           O  
ANISOU  620  O   GLY A  84     2900   3207   2835     39    141   -217       O  
ATOM    621  N   ASN A  85      27.185 -25.808  24.061  1.00 24.15           N  
ANISOU  621  N   ASN A  85     2942   3394   2840   -229     82   -298       N  
ATOM    622  CA  ASN A  85      26.885 -24.401  23.803  1.00 27.13           C  
ANISOU  622  CA  ASN A  85     3486   3654   3167   -316    -20   -275       C  
ATOM    623  C   ASN A  85      27.851 -23.845  22.753  1.00 27.34           C  
ANISOU  623  C   ASN A  85     3518   3733   3135   -576    -66   -293       C  
ATOM    624  O   ASN A  85      28.651 -24.589  22.197  1.00 24.46           O  
ANISOU  624  O   ASN A  85     3009   3511   2775   -668     -6   -326       O  
ATOM    625  CB  ASN A  85      26.816 -23.556  25.117  1.00 24.72           C  
ANISOU  625  CB  ASN A  85     3310   3264   2818   -199    -98   -289       C  
ATOM    626  CG  ASN A  85      28.173 -23.187  25.670  1.00 27.18           C  
ANISOU  626  CG  ASN A  85     3620   3638   3068   -296   -151   -344       C  
ATOM    627  ND2 ASN A  85      28.181 -22.552  26.858  1.00 30.56           N  
ANISOU  627  ND2 ASN A  85     4161   3994   3457   -190   -218   -359       N  
ATOM    628  OD1 ASN A  85      29.201 -23.461  25.061  1.00 28.51           O  
ANISOU  628  OD1 ASN A  85     3684   3930   3217   -461   -134   -376       O  
ATOM    629  N   GLU A  86      27.780 -22.551  22.475  1.00 29.33           N  
ANISOU  629  N   GLU A  86     3946   3876   3323   -695   -177   -275       N  
ATOM    630  CA  GLU A  86      28.555 -21.982  21.371  1.00 30.47           C  
ANISOU  630  CA  GLU A  86     4116   4062   3398   -971   -224   -277       C  
ATOM    631  C   GLU A  86      30.070 -22.044  21.591  1.00 32.00           C  
ANISOU  631  C   GLU A  86     4204   4424   3532  -1119   -223   -336       C  
ATOM    632  O   GLU A  86      30.837 -21.885  20.645  1.00 31.46           O  
ANISOU  632  O   GLU A  86     4088   4459   3407  -1352   -226   -346       O  
ATOM    633  CB  GLU A  86      28.099 -20.547  21.085  1.00 31.49           C  
ANISOU  633  CB  GLU A  86     4496   4012   3457  -1066   -364   -240       C  
ATOM    634  CG  GLU A  86      26.669 -20.451  20.542  1.00 30.99           C  
ANISOU  634  CG  GLU A  86     4522   3813   3442   -954   -373   -189       C  
ATOM    635  CD  GLU A  86      25.581 -20.687  21.593  1.00 38.90           C  
ANISOU  635  CD  GLU A  86     5534   4744   4501   -655   -351   -182       C  
ATOM    636  OE1 GLU A  86      25.898 -20.881  22.790  1.00 32.83           O  
ANISOU  636  OE1 GLU A  86     4729   4011   3735   -530   -334   -213       O  
ATOM    637  OE2 GLU A  86      24.390 -20.673  21.211  1.00 43.61           O1-
ANISOU  637  OE2 GLU A  86     6172   5261   5136   -548   -352   -146       O1-
ATOM    638  N   PHE A  87      30.504 -22.287  22.831  1.00 29.96           N  
ANISOU  638  N   PHE A  87     3898   4205   3279   -986   -219   -376       N  
ATOM    639  CA  PHE A  87      31.935 -22.258  23.136  1.00 31.98           C  
ANISOU  639  CA  PHE A  87     4054   4626   3472  -1117   -235   -436       C  
ATOM    640  C   PHE A  87      32.528 -23.639  23.358  1.00 35.98           C  
ANISOU  640  C   PHE A  87     4325   5317   4027  -1004   -125   -495       C  
ATOM    641  O   PHE A  87      33.730 -23.779  23.560  1.00 38.08           O  
ANISOU  641  O   PHE A  87     4470   5755   4244  -1087   -128   -558       O  
ATOM    642  CB  PHE A  87      32.216 -21.345  24.344  1.00 33.01           C  
ANISOU  642  CB  PHE A  87     4327   4669   3546  -1087   -344   -447       C  
ATOM    643  CG  PHE A  87      31.699 -19.954  24.156  1.00 36.27           C  
ANISOU  643  CG  PHE A  87     5002   4887   3892  -1188   -476   -398       C  
ATOM    644  CD1 PHE A  87      32.381 -19.060  23.354  1.00 36.84           C  
ANISOU  644  CD1 PHE A  87     5158   4978   3863  -1489   -562   -386       C  
ATOM    645  CD2 PHE A  87      30.509 -19.555  24.743  1.00 33.67           C  
ANISOU  645  CD2 PHE A  87     4840   4362   3591   -982   -519   -366       C  
ATOM    646  CE1 PHE A  87      31.900 -17.790  23.149  1.00 40.66           C  
ANISOU  646  CE1 PHE A  87     5915   5260   4273  -1582   -702   -340       C  
ATOM    647  CE2 PHE A  87      30.019 -18.286  24.541  1.00 34.59           C  
ANISOU  647  CE2 PHE A  87     5213   4291   3637  -1048   -655   -330       C  
ATOM    648  CZ  PHE A  87      30.716 -17.400  23.746  1.00 39.73           C  
ANISOU  648  CZ  PHE A  87     5974   4934   4187  -1348   -754   -317       C  
ATOM    649  N   GLY A  88      31.691 -24.666  23.316  1.00 34.07           N  
ANISOU  649  N   GLY A  88     4025   5046   3874   -816    -37   -478       N  
ATOM    650  CA  GLY A  88      32.203 -26.011  23.465  1.00 30.49           C  
ANISOU  650  CA  GLY A  88     3384   4744   3457   -703     51   -534       C  
ATOM    651  C   GLY A  88      31.172 -27.007  23.926  1.00 28.61           C  
ANISOU  651  C   GLY A  88     3144   4421   3305   -466    117   -504       C  
ATOM    652  O   GLY A  88      29.982 -26.725  23.958  1.00 30.21           O  
ANISOU  652  O   GLY A  88     3459   4475   3546   -399    113   -437       O  
ATOM    653  N   SER A  89      31.648 -28.186  24.288  1.00 29.88           N  
ANISOU  653  N   SER A  89     3178   4689   3487   -342    171   -556       N  
ATOM    654  CA  SER A  89      30.776 -29.257  24.719  1.00 31.45           C  
ANISOU  654  CA  SER A  89     3378   4820   3751   -142    230   -526       C  
ATOM    655  C   SER A  89      31.473 -30.075  25.804  1.00 33.57           C  
ANISOU  655  C   SER A  89     3582   5160   4012     13    234   -590       C  
ATOM    656  O   SER A  89      32.681 -29.961  26.004  1.00 34.00           O  
ANISOU  656  O   SER A  89     3555   5346   4017    -33    202   -667       O  
ATOM    657  CB  SER A  89      30.451 -30.155  23.533  1.00 33.06           C  
ANISOU  657  CB  SER A  89     3515   5060   3988   -169    294   -512       C  
ATOM    658  OG  SER A  89      31.571 -30.958  23.242  1.00 36.93           O  
ANISOU  658  OG  SER A  89     3868   5718   4448   -170    315   -598       O  
ATOM    659  N   ASP A  90      30.706 -30.902  26.497  1.00 29.36           N  
ANISOU  659  N   ASP A  90     3087   4549   3520    189    269   -558       N  
ATOM    660  CA  ASP A  90      31.256 -31.779  27.517  1.00 31.17           C  
ANISOU  660  CA  ASP A  90     3283   4822   3738    346    267   -612       C  
ATOM    661  C   ASP A  90      30.287 -32.930  27.636  1.00 31.36           C  
ANISOU  661  C   ASP A  90     3343   4770   3803    475    319   -560       C  
ATOM    662  O   ASP A  90      29.099 -32.765  27.390  1.00 34.28           O  
ANISOU  662  O   ASP A  90     3776   5042   4207    463    349   -476       O  
ATOM    663  CB  ASP A  90      31.391 -31.029  28.854  1.00 29.64           C  
ANISOU  663  CB  ASP A  90     3168   4577   3519    410    214   -617       C  
ATOM    664  CG  ASP A  90      32.263 -31.778  29.888  1.00 32.52           C  
ANISOU  664  CG  ASP A  90     3491   5008   3857    549    192   -691       C  
ATOM    665  OD1 ASP A  90      33.052 -32.678  29.535  1.00 33.92           O  
ANISOU  665  OD1 ASP A  90     3565   5300   4022    579    199   -760       O  
ATOM    666  OD2 ASP A  90      32.158 -31.449  31.079  1.00 33.50           O1-
ANISOU  666  OD2 ASP A  90     3695   5068   3966    640    161   -685       O1-
ATOM    667  N   SER A  91      30.795 -34.103  27.974  1.00 28.61           N  
ANISOU  667  N   SER A  91     2958   4471   3443    591    322   -611       N  
ATOM    668  CA  SER A  91      29.936 -35.253  28.199  1.00 32.97           C  
ANISOU  668  CA  SER A  91     3570   4940   4015    701    356   -559       C  
ATOM    669  C   SER A  91      30.527 -36.137  29.306  1.00 41.38           C  
ANISOU  669  C   SER A  91     4660   6016   5046    863    324   -614       C  
ATOM    670  O   SER A  91      31.735 -36.111  29.562  1.00 41.90           O  
ANISOU  670  O   SER A  91     4659   6184   5076    895    280   -711       O  
ATOM    671  CB  SER A  91      29.776 -36.058  26.917  1.00 29.21           C  
ANISOU  671  CB  SER A  91     3054   4488   3556    652    387   -553       C  
ATOM    672  OG  SER A  91      30.998 -36.676  26.613  1.00 36.15           O  
ANISOU  672  OG  SER A  91     3849   5490   4397    690    361   -660       O  
ATOM    673  N   ALA A  92      29.663 -36.896  29.973  1.00 38.28           N  
ANISOU  673  N   ALA A  92     4365   5525   4655    956    342   -550       N  
ATOM    674  CA  ALA A  92      30.091 -37.862  30.976  1.00 35.09           C  
ANISOU  674  CA  ALA A  92     4019   5105   4210   1106    304   -590       C  
ATOM    675  C   ALA A  92      29.079 -38.992  30.994  1.00 34.00           C  
ANISOU  675  C   ALA A  92     3981   4869   4069   1142    329   -509       C  
ATOM    676  O   ALA A  92      27.919 -38.794  30.637  1.00 30.73           O  
ANISOU  676  O   ALA A  92     3589   4401   3686   1064    381   -411       O  
ATOM    677  CB  ALA A  92      30.187 -37.204  32.342  1.00 34.13           C  
ANISOU  677  CB  ALA A  92     3947   4955   4065   1171    281   -592       C  
ATOM    678  N   THR A  93      29.514 -40.176  31.406  1.00 33.07           N  
ANISOU  678  N   THR A  93     3929   4729   3906   1257    283   -550       N  
ATOM    679  CA  THR A  93      28.634 -41.333  31.423  1.00 32.52           C  
ANISOU  679  CA  THR A  93     3980   4559   3816   1274    288   -472       C  
ATOM    680  C   THR A  93      28.493 -41.914  32.843  1.00 31.59           C  
ANISOU  680  C   THR A  93     3997   4366   3640   1381    255   -451       C  
ATOM    681  O   THR A  93      29.469 -41.984  33.601  1.00 31.60           O  
ANISOU  681  O   THR A  93     4010   4392   3605   1494    195   -538       O  
ATOM    682  CB  THR A  93      29.125 -42.415  30.435  1.00 38.13           C  
ANISOU  682  CB  THR A  93     4699   5280   4508   1303    248   -528       C  
ATOM    683  CG2 THR A  93      28.203 -43.613  30.444  1.00 41.60           C  
ANISOU  683  CG2 THR A  93     5291   5598   4915   1301    238   -441       C  
ATOM    684  OG1 THR A  93      29.141 -41.877  29.104  1.00 41.35           O  
ANISOU  684  OG1 THR A  93     4990   5758   4964   1189    288   -536       O  
ATOM    685  N   VAL A  94      27.274 -42.305  33.204  1.00 27.88           N  
ANISOU  685  N   VAL A  94     3625   3815   3154   1336    293   -334       N  
ATOM    686  CA  VAL A  94      27.033 -42.956  34.491  1.00 31.93           C  
ANISOU  686  CA  VAL A  94     4282   4255   3596   1411    265   -298       C  
ATOM    687  C   VAL A  94      26.414 -44.319  34.234  1.00 34.61           C  
ANISOU  687  C   VAL A  94     4761   4504   3887   1380    240   -230       C  
ATOM    688  O   VAL A  94      25.496 -44.449  33.424  1.00 32.17           O  
ANISOU  688  O   VAL A  94     4435   4184   3603   1262    288   -146       O  
ATOM    689  CB  VAL A  94      26.129 -42.120  35.441  1.00 28.50           C  
ANISOU  689  CB  VAL A  94     3848   3824   3156   1381    332   -216       C  
ATOM    690  CG1 VAL A  94      24.775 -41.845  34.811  1.00 25.63           C  
ANISOU  690  CG1 VAL A  94     3441   3472   2826   1251    415   -104       C  
ATOM    691  CG2 VAL A  94      25.958 -42.830  36.800  1.00 24.92           C  
ANISOU  691  CG2 VAL A  94     3550   3305   2613   1452    303   -184       C  
ATOM    692  N   ASN A  95      26.941 -45.336  34.906  1.00 30.94           N  
ANISOU  692  N   ASN A  95     4445   3966   3344   1485    154   -267       N  
ATOM    693  CA  ASN A  95      26.438 -46.691  34.774  1.00 31.34           C  
ANISOU  693  CA  ASN A  95     4675   3906   3326   1458    103   -205       C  
ATOM    694  C   ASN A  95      25.399 -46.963  35.860  1.00 30.52           C  
ANISOU  694  C   ASN A  95     4698   3745   3154   1393    133    -81       C  
ATOM    695  O   ASN A  95      25.713 -46.966  37.055  1.00 31.66           O  
ANISOU  695  O   ASN A  95     4921   3866   3242   1476    103   -100       O  
ATOM    696  CB  ASN A  95      27.601 -47.678  34.880  1.00 36.56           C  
ANISOU  696  CB  ASN A  95     5454   4512   3924   1620    -27   -321       C  
ATOM    697  CG  ASN A  95      27.198 -49.106  34.556  1.00 41.12           C  
ANISOU  697  CG  ASN A  95     6243   4956   4423   1599   -106   -271       C  
ATOM    698  ND2 ASN A  95      28.190 -49.959  34.336  1.00 36.91           N  
ANISOU  698  ND2 ASN A  95     5807   4378   3838   1752   -227   -385       N  
ATOM    699  OD1 ASN A  95      26.016 -49.443  34.514  1.00 43.96           O  
ANISOU  699  OD1 ASN A  95     6685   5259   4761   1450    -66   -135       O  
ATOM    700  N   ILE A  96      24.160 -47.180  35.441  1.00 30.07           N  
ANISOU  700  N   ILE A  96     4654   3678   3095   1237    192     46       N  
ATOM    701  CA  ILE A  96      23.056 -47.405  36.363  1.00 31.46           C  
ANISOU  701  CA  ILE A  96     4918   3839   3197   1143    237    173       C  
ATOM    702  C   ILE A  96      22.806 -48.892  36.532  1.00 33.59           C  
ANISOU  702  C   ILE A  96     5429   3979   3356   1095    148    235       C  
ATOM    703  O   ILE A  96      22.495 -49.587  35.559  1.00 32.71           O  
ANISOU  703  O   ILE A  96     5369   3816   3243   1012    117    271       O  
ATOM    704  CB  ILE A  96      21.759 -46.741  35.847  1.00 31.65           C  
ANISOU  704  CB  ILE A  96     4800   3956   3270    990    353    281       C  
ATOM    705  CG1 ILE A  96      21.964 -45.233  35.674  1.00 33.49           C  
ANISOU  705  CG1 ILE A  96     4827   4296   3600   1038    424    222       C  
ATOM    706  CG2 ILE A  96      20.599 -47.024  36.790  1.00 33.29           C  
ANISOU  706  CG2 ILE A  96     5078   4185   3384    886    405    410       C  
ATOM    707  CD1 ILE A  96      22.274 -44.502  36.997  1.00 33.51           C  
ANISOU  707  CD1 ILE A  96     4825   4334   3575   1142    441    186       C  
ATOM    708  N   HIS A  97      22.950 -49.373  37.764  1.00 30.22           N  
ANISOU  708  N   HIS A  97     5166   3489   2827   1143     99    247       N  
ATOM    709  CA  HIS A  97      22.745 -50.776  38.104  1.00 35.01           C  
ANISOU  709  CA  HIS A  97     6045   3953   3304   1094     -4    308       C  
ATOM    710  C   HIS A  97      21.438 -50.946  38.870  1.00 37.63           C  
ANISOU  710  C   HIS A  97     6438   4313   3545    913     67    468       C  
ATOM    711  O   HIS A  97      21.232 -50.315  39.909  1.00 34.38           O  
ANISOU  711  O   HIS A  97     5977   3976   3109    931    134    486       O  
ATOM    712  CB  HIS A  97      23.894 -51.295  38.992  1.00 37.72           C  
ANISOU  712  CB  HIS A  97     6563   4195   3575   1278   -131    205       C  
ATOM    713  CG  HIS A  97      25.261 -50.944  38.491  1.00 39.45           C  
ANISOU  713  CG  HIS A  97     6677   4440   3873   1475   -187     33       C  
ATOM    714  CD2 HIS A  97      26.035 -49.852  38.704  1.00 39.92           C  
ANISOU  714  CD2 HIS A  97     6547   4607   4013   1591   -147    -70       C  
ATOM    715  ND1 HIS A  97      25.990 -51.775  37.665  1.00 39.40           N  
ANISOU  715  ND1 HIS A  97     6760   4357   3854   1568   -303    -53       N  
ATOM    716  CE1 HIS A  97      27.149 -51.206  37.384  1.00 41.31           C  
ANISOU  716  CE1 HIS A  97     6850   4681   4166   1731   -321   -203       C  
ATOM    717  NE2 HIS A  97      27.203 -50.040  38.004  1.00 40.13           N  
ANISOU  717  NE2 HIS A  97     6534   4641   4074   1736   -230   -212       N  
ATOM    718  N   ILE A  98      20.567 -51.812  38.371  1.00 39.37           N  
ANISOU  718  N   ILE A  98     6769   4483   3705    734     48    583       N  
ATOM    719  CA  ILE A  98      19.308 -52.090  39.041  1.00 39.29           C  
ANISOU  719  CA  ILE A  98     6817   4522   3589    533    111    742       C  
ATOM    720  C   ILE A  98      19.432 -53.402  39.805  1.00 44.91           C  
ANISOU  720  C   ILE A  98     7863   5068   4134    491    -21    789       C  
ATOM    721  O   ILE A  98      19.774 -54.424  39.220  1.00 48.61           O  
ANISOU  721  O   ILE A  98     8531   5378   4559    489   -153    777       O  
ATOM    722  CB  ILE A  98      18.146 -52.188  38.035  1.00 41.02           C  
ANISOU  722  CB  ILE A  98     6940   4811   3834    324    174    856       C  
ATOM    723  CG1 ILE A  98      18.197 -51.025  37.034  1.00 41.59           C  
ANISOU  723  CG1 ILE A  98     6725   5002   4073    385    265    791       C  
ATOM    724  CG2 ILE A  98      16.813 -52.228  38.762  1.00 42.82           C  
ANISOU  724  CG2 ILE A  98     7151   5160   3960    119    267   1011       C  
ATOM    725  CD1 ILE A  98      18.100 -49.650  37.667  1.00 42.41           C  
ANISOU  725  CD1 ILE A  98     6612   5263   4239    469    385    756       C  
ATOM    726  N   ARG A  99      19.164 -53.365  41.111  1.00 44.29           N  
ANISOU  726  N   ARG A  99     7858   5018   3952    464      8    840       N  
ATOM    727  CA  ARG A  99      19.297 -54.541  41.970  1.00 51.08           C  
ANISOU  727  CA  ARG A  99     9054   5715   4638    421   -121    887       C  
ATOM    728  C   ARG A  99      18.011 -55.357  41.965  1.00 56.43           C  
ANISOU  728  C   ARG A  99     9861   6397   5183    121   -111   1072       C  
ATOM    729  O   ARG A  99      16.921 -54.806  42.113  1.00 53.62           O  
ANISOU  729  O   ARG A  99     9318   6231   4822    -39     37   1174       O  
ATOM    730  CB  ARG A  99      19.613 -54.137  43.416  1.00 55.96           C  
ANISOU  730  CB  ARG A  99     9707   6361   5192    517    -98    861       C  
ATOM    731  CG  ARG A  99      20.716 -53.100  43.596  1.00 58.90           C  
ANISOU  731  CG  ARG A  99     9909   6778   5691    779    -80    697       C  
ATOM    732  CD  ARG A  99      20.723 -52.557  45.044  1.00 61.18           C  
ANISOU  732  CD  ARG A  99    10202   7130   5913    832    -25    700       C  
ATOM    733  NE  ARG A  99      21.295 -53.510  45.994  1.00 66.61           N  
ANISOU  733  NE  ARG A  99    11206   7645   6457    885   -170    689       N  
ATOM    734  CZ  ARG A  99      21.172 -53.432  47.319  1.00 72.99           C  
ANISOU  734  CZ  ARG A  99    12113   8466   7155    882   -152    723       C  
ATOM    735  NH1 ARG A  99      20.475 -52.451  47.881  1.00 71.14           N1+
ANISOU  735  NH1 ARG A  99    11680   8419   6931    835     10    770       N1+
ATOM    736  NH2 ARG A  99      21.735 -54.353  48.091  1.00 79.71           N  
ANISOU  736  NH2 ARG A  99    13274   9139   7874    932   -303    709       N  
ATOM    737  N   SER A 100      18.146 -56.671  41.809  1.00 65.90           N  
ANISOU  737  N   SER A 100    11383   7392   6262     48   -275   1110       N  
ATOM    738  CA  SER A 100      16.997 -57.571  41.802  1.00 76.19           C  
ANISOU  738  CA  SER A 100    12855   8677   7418   -261   -294   1291       C  
ATOM    739  C   SER A 100      16.263 -57.580  43.140  1.00 82.14           C  
ANISOU  739  C   SER A 100    13664   9528   8019   -422   -223   1409       C  
ATOM    740  O   SER A 100      16.849 -57.291  44.184  1.00 80.43           O  
ANISOU  740  O   SER A 100    13492   9297   7770   -276   -227   1345       O  
ATOM    741  CB  SER A 100      17.436 -58.995  41.456  1.00 81.17           C  
ANISOU  741  CB  SER A 100    13877   9031   7934   -282   -517   1295       C  
ATOM    742  OG  SER A 100      17.923 -59.071  40.131  1.00 83.74           O  
ANISOU  742  OG  SER A 100    14150   9289   8379   -170   -574   1205       O  
ATOM    743  N   ILE A 101      14.977 -57.918  43.093  1.00 89.36           N  
ANISOU  743  N   ILE A 101    14568  10552   8832   -731   -159   1580       N  
ATOM    744  CA  ILE A 101      14.151 -58.052  44.293  1.00 95.61           C  
ANISOU  744  CA  ILE A 101    15417  11462   9448   -933    -89   1711       C  
ATOM    745  C   ILE A 101      13.983 -56.735  45.048  1.00 98.13           C  
ANISOU  745  C   ILE A 101    15424  12026   9833   -816     99   1667       C  
ATOM    746  O   ILE A 101      13.230 -56.673  46.019  1.00 99.41           O  
ANISOU  746  O   ILE A 101    15573  12341   9859   -968    189   1767       O  
ATOM    747  CB  ILE A 101      14.706 -59.123  45.257  1.00 96.91           C  
ANISOU  747  CB  ILE A 101    16008  11391   9424   -945   -263   1728       C  
ATOM    748  OXT ILE A 101      14.586 -55.712  44.716  1.00 97.44           O1-
ANISOU  748  OXT ILE A 101    15104  11992   9925   -572    160   1532       O1-
HETATM  749  O1  SO4 A 103      27.994 -31.739  20.118  1.00106.90           O  
HETATM  750  O2  SO4 A 103      25.620 -31.564  20.295  1.00107.46           O  
HETATM  751  O3  SO4 A 103      26.757 -33.399  21.309  1.00108.03           O1-
HETATM  752  O4  SO4 A 103      26.984 -31.201  22.210  1.00108.62           O  
HETATM  753  S   SO4 A 103      26.840 -31.978  20.982  1.00108.24           S  
HETATM  754  O   HOH A 104      23.914 -37.707  25.541  1.00 19.88           O  
HETATM  755  O   HOH A 105      23.553 -31.652  24.445  1.00 22.26           O  
HETATM  756  O   HOH A 106      30.773 -44.747  34.220  1.00 46.87           O  
HETATM  757  O   HOH A 107      31.008 -39.794  35.326  1.00 34.55           O  
HETATM  758  O   HOH A 108      24.012 -26.308  40.467  1.00 36.60           O  
HETATM  759  O   HOH A 109      15.362 -30.300  41.844  1.00 38.15           O  
HETATM  760  O   HOH A 110      24.041 -43.015  24.614  1.00 29.06           O  
HETATM  761  O   HOH A 111      25.379 -43.796  26.995  1.00 35.61           O  
HETATM  762  O   HOH A 112      15.536 -42.126  15.025  1.00 44.11           O  
HETATM  763  O   HOH A 113      24.172 -47.094  26.416  1.00 49.15           O  
HETATM  764  O   HOH A 114      14.419 -48.495  29.436  1.00 53.31           O  
HETATM  765  O   HOH A 115      17.646 -32.162  41.890  1.00 41.51           O  
HETATM  766  O   HOH A 116      24.377 -37.255  40.850  1.00 55.49           O  
HETATM  767  O   HOH A 117      17.896 -48.819  46.624  1.00 37.17           O  
HETATM  768  O   HOH A 118      13.350 -28.624  32.199  1.00 51.93           O  
HETATM  769  O   HOH A 119       8.220 -34.449  32.795  1.00 59.55           O  
HETATM  770  O   HOH A 120      27.255 -20.660  34.209  1.00 45.69           O  
HETATM  771  O   HOH A 121      12.673 -41.399  25.298  1.00 59.78           O  
HETATM  772  O   HOH A 122      21.503 -53.503  36.098  1.00 39.53           O  
HETATM  773  O   HOH A 123      33.381 -41.289  36.215  1.00 54.02           O  
HETATM  774  O   HOH A 124      13.173 -40.792  43.383  1.00 40.07           O  
HETATM  775  O   HOH A 125      35.822 -21.946  23.476  1.00 50.02           O  
HETATM  776  O   HOH A 126      16.356 -43.174  17.434  1.00 33.40           O  
HETATM  777  O   HOH A 127      25.329 -16.256  29.391  1.00 50.93           O  
HETATM  778  O   HOH A 128      22.415 -18.809  22.280  1.00 56.83           O  
HETATM  779  O   HOH A 129      23.565 -21.195  32.540  1.00 42.19           O  
HETATM  780  O   HOH A 130      18.467 -49.210  29.275  1.00 46.75           O  
HETATM  781  O   HOH A 131      24.113 -51.452  34.628  1.00 40.63           O  
HETATM  782  O   HOH A 132       8.765 -32.914  30.186  1.00 53.09           O  
HETATM  783  O   HOH A 133      13.763 -52.469  47.768  1.00 61.89           O  
HETATM  784  O   HOH A 134      21.633 -39.907  19.595  1.00 29.96           O  
HETATM  785  O   HOH A 135      20.951 -20.995  25.976  1.00 52.72           O  
HETATM  786  O   HOH A 136      18.164 -25.340  31.126  1.00 51.33           O  
HETATM  787  O   HOH A 137      16.969 -47.416  29.280  1.00 36.46           O  
HETATM  788  O   HOH A 138      22.043 -18.206  28.934  1.00 55.99           O  
HETATM  789  O   HOH A 139      34.822 -28.233  23.903  1.00 52.39           O  
HETATM  790  O   HOH A 140      33.430 -34.845  31.848  1.00 65.79           O  
HETATM  791  O   HOH A 141      19.217 -24.794  40.124  1.00 57.64           O  
HETATM  792  O   HOH A 142      17.648 -35.443  26.784  1.00 24.49           O  
HETATM  793  O   HOH A 143      18.268 -26.918  19.742  1.00 27.58           O  
HETATM  794  O   HOH A 144      26.750 -48.765  41.794  1.00 45.69           O  
HETATM  795  O   HOH A 145      17.349 -30.168  37.814  1.00 35.34           O  
HETATM  796  O   HOH A 146      18.388 -28.223  27.190  1.00 29.96           O  
HETATM  797  O   HOH A 147      26.679 -28.205  43.107  1.00 49.35           O  
HETATM  798  O   HOH A 148      34.098 -14.715  24.577  1.00 38.59           O  
HETATM  799  O   HOH A 149      17.215 -32.926  28.269  1.00 35.57           O  
HETATM  800  O   HOH A 150      17.749 -31.481  24.702  1.00 47.68           O  
HETATM  801  O   HOH A 151      27.166 -32.703  40.190  1.00 47.00           O  
HETATM  802  O   HOH A 152      15.569 -28.557  28.317  1.00 64.96           O  
HETATM  803  O   HOH A 153      33.627 -29.295  21.155  1.00 58.78           O  
HETATM  804  O   HOH A 154      22.819 -31.655  19.909  1.00 39.89           O  
HETATM  805  O   HOH A 155      20.627 -33.445  21.186  1.00 35.35           O  
HETATM  806  O   HOH A 156      32.491 -40.272  31.927  1.00 46.15           O  
HETATM  807  O   HOH A 157      15.894 -37.587  19.097  1.00 45.33           O  
HETATM  808  O   HOH A 158      18.805 -31.714  21.778  1.00 54.08           O  
HETATM  809  O   HOH A 159      17.378 -26.356  41.845  1.00 58.21           O  
HETATM  810  O   HOH A 160      24.503 -34.028  22.298  1.00 65.14           O  
HETATM  811  O   HOH A 161      24.969 -53.076  41.840  1.00 53.57           O  
HETATM  812  O   HOH A 162      24.037 -19.746  18.380  1.00 59.86           O  
HETATM  813  O   HOH A 163      14.948 -32.249  28.089  1.00 52.14           O  
HETATM  814  O   HOH A 164      21.572 -25.131  41.309  1.00 67.63           O  
HETATM  815  O   HOH A 165      13.161 -31.141  30.012  1.00 48.42           O  
HETATM  816  O   HOH A 166      24.505 -34.305  18.620  1.00 51.11           O  
HETATM  817  O   HOH A 167      35.589 -20.547  21.305  0.50 59.04           O  
HETATM  818  O   HOH A 168      25.520 -22.406  35.729  1.00 55.11           O  
HETATM  819  O   HOH A 169      17.011 -44.406  24.801  1.00 40.48           O  
HETATM  820  O   HOH A 170      21.482 -37.208  42.610  0.50 29.80           O  
HETATM  821  O   HOH A 171      33.701 -27.470  27.120  1.00 42.02           O  
HETATM  822  O   HOH A 172      20.974 -58.120  41.020  1.00 57.77           O  
ATOM    823  N   GLY B   2      26.657 -61.155  16.785  1.00 90.23           N  
ANISOU  823  N   GLY B   2    15263   6361  12659   1656   3763    878       N  
ATOM    824  CA  GLY B   2      25.377 -60.694  16.280  1.00 86.35           C  
ANISOU  824  CA  GLY B   2    14709   5888  12212    920   3283    708       C  
ATOM    825  C   GLY B   2      25.544 -59.695  15.156  1.00 78.87           C  
ANISOU  825  C   GLY B   2    13688   5229  11050    702   2977    480       C  
ATOM    826  O   GLY B   2      26.668 -59.349  14.800  1.00 76.47           O  
ANISOU  826  O   GLY B   2    13370   5106  10578   1118   3178    449       O  
ATOM    827  N   PRO B   3      24.422 -59.226  14.592  1.00 75.28           N  
ANISOU  827  N   PRO B   3    13163   4821  10618     53   2495    352       N  
ATOM    828  CA  PRO B   3      24.412 -58.286  13.464  1.00 71.49           C  
ANISOU  828  CA  PRO B   3    12671   4581   9912   -220   2150    152       C  
ATOM    829  C   PRO B   3      24.722 -56.848  13.869  1.00 61.28           C  
ANISOU  829  C   PRO B   3    10619   3962   8701     19   1946    284       C  
ATOM    830  O   PRO B   3      24.949 -56.010  12.996  1.00 57.59           O  
ANISOU  830  O   PRO B   3    10133   3714   8035    -84   1749    149       O  
ATOM    831  CB  PRO B   3      22.972 -58.379  12.955  1.00 76.40           C  
ANISOU  831  CB  PRO B   3    13394   5027  10606   -991   1662     65       C  
ATOM    832  CG  PRO B   3      22.182 -58.724  14.167  1.00 76.73           C  
ANISOU  832  CG  PRO B   3    13040   5057  11055  -1045   1674    320       C  
ATOM    833  CD  PRO B   3      23.061 -59.640  14.976  1.00 77.82           C  
ANISOU  833  CD  PRO B   3    13421   4940  11205   -473   2257    428       C  
ATOM    834  N   GLY B   4      24.728 -56.571  15.171  1.00 52.30           N  
ANISOU  834  N   GLY B   4     8933   3115   7824    318   2005    539       N  
ATOM    835  CA  GLY B   4      24.943 -55.225  15.670  1.00 45.43           C  
ANISOU  835  CA  GLY B   4     7406   2831   7024    498   1814    657       C  
ATOM    836  C   GLY B   4      26.190 -54.559  15.128  1.00 42.95           C  
ANISOU  836  C   GLY B   4     7049   2782   6488    821   1922    570       C  
ATOM    837  O   GLY B   4      27.282 -55.115  15.174  1.00 48.29           O  
ANISOU  837  O   GLY B   4     7914   3359   7075   1249   2299    591       O  
ATOM    838  N   ILE B   5      26.024 -53.346  14.621  1.00 38.27           N  
ANISOU  838  N   ILE B   5     6179   2527   5836    626   1612    505       N  
ATOM    839  CA  ILE B   5      27.117 -52.630  14.009  1.00 37.16           C  
ANISOU  839  CA  ILE B   5     5992   2626   5502    851   1707    423       C  
ATOM    840  C   ILE B   5      27.072 -51.178  14.442  1.00 33.56           C  
ANISOU  840  C   ILE B   5     4946   2676   5131    849   1447    513       C  
ATOM    841  O   ILE B   5      26.047 -50.520  14.289  1.00 33.22           O  
ANISOU  841  O   ILE B   5     4741   2722   5159    499   1107    515       O  
ATOM    842  CB  ILE B   5      27.013 -52.697  12.451  1.00 42.65           C  
ANISOU  842  CB  ILE B   5     7231   3069   5903    530   1637    174       C  
ATOM    843  CG1 ILE B   5      27.093 -54.140  11.966  1.00 49.66           C  
ANISOU  843  CG1 ILE B   5     8836   3384   6649    511   1936     46       C  
ATOM    844  CG2 ILE B   5      28.089 -51.865  11.799  1.00 46.16           C  
ANISOU  844  CG2 ILE B   5     7612   3765   6163    745   1771    112       C  
ATOM    845  CD1 ILE B   5      26.798 -54.304  10.481  1.00 55.51           C  
ANISOU  845  CD1 ILE B   5    10247   3807   7038    105   1819   -219       C  
ATOM    846  N   PRO B   6      28.196 -50.661  14.953  1.00 33.34           N  
ANISOU  846  N   PRO B   6     4599   2966   5101   1232   1606    600       N  
ATOM    847  CA  PRO B   6      28.294 -49.249  15.353  1.00 30.93           C  
ANISOU  847  CA  PRO B   6     3810   3103   4837   1218   1392    658       C  
ATOM    848  C   PRO B   6      28.078 -48.370  14.123  1.00 35.86           C  
ANISOU  848  C   PRO B   6     4535   3779   5312    921   1204    505       C  
ATOM    849  O   PRO B   6      28.355 -48.828  13.018  1.00 35.09           O  
ANISOU  849  O   PRO B   6     4858   3449   5024    857   1323    361       O  
ATOM    850  CB  PRO B   6      29.745 -49.111  15.825  1.00 33.00           C  
ANISOU  850  CB  PRO B   6     3829   3622   5085   1636   1616    750       C  
ATOM    851  CG  PRO B   6      30.262 -50.512  15.987  1.00 39.52           C  
ANISOU  851  CG  PRO B   6     4923   4163   5928   1947   1950    817       C  
ATOM    852  CD  PRO B   6      29.475 -51.376  15.072  1.00 36.92           C  
ANISOU  852  CD  PRO B   6     5151   3363   5516   1681   1998    656       C  
ATOM    853  N   PRO B   7      27.606 -47.127  14.306  1.00 31.53           N  
ANISOU  853  N   PRO B   7     3659   3500   4819    764    946    546       N  
ATOM    854  CA  PRO B   7      27.324 -46.250  13.158  1.00 28.88           C  
ANISOU  854  CA  PRO B   7     3426   3209   4339    496    749    443       C  
ATOM    855  C   PRO B   7      28.589 -45.681  12.539  1.00 30.43           C  
ANISOU  855  C   PRO B   7     3640   3559   4365    652    944    368       C  
ATOM    856  O   PRO B   7      29.603 -45.548  13.218  1.00 29.30           O  
ANISOU  856  O   PRO B   7     3228   3618   4288    934   1136    436       O  
ATOM    857  CB  PRO B   7      26.520 -45.098  13.770  1.00 28.23           C  
ANISOU  857  CB  PRO B   7     2954   3355   4418    378    500    563       C  
ATOM    858  CG  PRO B   7      26.184 -45.542  15.209  1.00 27.23           C  
ANISOU  858  CG  PRO B   7     2599   3243   4507    535    572    709       C  
ATOM    859  CD  PRO B   7      27.262 -46.492  15.592  1.00 27.05           C  
ANISOU  859  CD  PRO B   7     2682   3167   4427    838    852    699       C  
ATOM    860  N   LYS B   8      28.520 -45.348  11.251  1.00 28.20           N  
ANISOU  860  N   LYS B   8     3670   3184   3863    452    884    249       N  
ATOM    861  CA  LYS B   8      29.650 -44.766  10.551  1.00 32.08           C  
ANISOU  861  CA  LYS B   8     4205   3789   4193    570   1113    192       C  
ATOM    862  C   LYS B   8      29.157 -43.762   9.507  1.00 34.08           C  
ANISOU  862  C   LYS B   8     4624   4067   4258    284    886    139       C  
ATOM    863  O   LYS B   8      28.328 -44.100   8.654  1.00 30.36           O  
ANISOU  863  O   LYS B   8     4556   3370   3609     23    676     67       O  
ATOM    864  CB  LYS B   8      30.464 -45.873   9.876  1.00 41.74           C  
ANISOU  864  CB  LYS B   8     5861   4742   5257    756   1504     99       C  
ATOM    865  CG  LYS B   8      31.660 -45.383   9.070  1.00 52.80           C  
ANISOU  865  CG  LYS B   8     7326   6223   6513    902   1840     66       C  
ATOM    866  CD  LYS B   8      32.661 -44.645   9.948  1.00 59.07           C  
ANISOU  866  CD  LYS B   8     7488   7409   7548   1131   1950    214       C  
ATOM    867  CE  LYS B   8      33.986 -44.448   9.227  1.00 65.17           C  
ANISOU  867  CE  LYS B   8     8263   8234   8266   1326   2384    230       C  
ATOM    868  NZ  LYS B   8      33.811 -43.746   7.927  1.00 69.40           N1+
ANISOU  868  NZ  LYS B   8     9188   8664   8515   1088   2397    112       N1+
ATOM    869  N   ILE B   9      29.653 -42.530   9.595  1.00 32.34           N  
ANISOU  869  N   ILE B   9     4108   4112   4068    314    903    189       N  
ATOM    870  CA  ILE B   9      29.386 -41.513   8.586  1.00 30.62           C  
ANISOU  870  CA  ILE B   9     4064   3913   3658    105    763    168       C  
ATOM    871  C   ILE B   9      30.313 -41.766   7.411  1.00 36.48           C  
ANISOU  871  C   ILE B   9     5234   4515   4113    161   1093     58       C  
ATOM    872  O   ILE B   9      31.531 -41.778   7.572  1.00 42.61           O  
ANISOU  872  O   ILE B   9     5846   5390   4953    395   1470     69       O  
ATOM    873  CB  ILE B   9      29.648 -40.097   9.130  1.00 29.16           C  
ANISOU  873  CB  ILE B   9     3462   4008   3609    116    729    259       C  
ATOM    874  CG1 ILE B   9      28.724 -39.806  10.317  1.00 29.68           C  
ANISOU  874  CG1 ILE B   9     3176   4171   3929     94    481    370       C  
ATOM    875  CG2 ILE B   9      29.475 -39.049   8.036  1.00 27.46           C  
ANISOU  875  CG2 ILE B   9     3469   3781   3184    -62    645    260       C  
ATOM    876  CD1 ILE B   9      29.208 -38.673  11.200  1.00 32.16           C  
ANISOU  876  CD1 ILE B   9     3124   4721   4375    155    535    428       C  
ATOM    877  N   GLU B  10      29.750 -41.984   6.229  1.00 35.49           N  
ANISOU  877  N   GLU B  10     5662   4154   3668    -53    960    -30       N  
ATOM    878  CA  GLU B  10      30.586 -42.213   5.053  1.00 44.86           C  
ANISOU  878  CA  GLU B  10     7372   5156   4516      3   1327   -142       C  
ATOM    879  C   GLU B  10      30.937 -40.884   4.364  1.00 45.30           C  
ANISOU  879  C   GLU B  10     7431   5353   4427    -67   1373    -94       C  
ATOM    880  O   GLU B  10      30.080 -40.222   3.787  1.00 49.75           O  
ANISOU  880  O   GLU B  10     8179   5908   4817   -311   1010    -60       O  
ATOM    881  CB  GLU B  10      29.902 -43.174   4.071  1.00 51.24           C  
ANISOU  881  CB  GLU B  10     8922   5591   4957   -215   1188   -287       C  
ATOM    882  CG  GLU B  10      29.143 -44.338   4.724  1.00 59.57           C  
ANISOU  882  CG  GLU B  10     9991   6476   6166   -286    990   -317       C  
ATOM    883  CD  GLU B  10      30.049 -45.413   5.341  1.00 63.86           C  
ANISOU  883  CD  GLU B  10    10504   6897   6865     65   1476   -347       C  
ATOM    884  OE1 GLU B  10      29.568 -46.163   6.225  1.00 54.86           O  
ANISOU  884  OE1 GLU B  10     9182   5700   5961     82   1364   -311       O  
ATOM    885  OE2 GLU B  10      31.228 -45.526   4.932  1.00 70.75           O1-
ANISOU  885  OE2 GLU B  10    11530   7716   7636    339   1992   -376       O1-
ATOM    886  N   ALA B  11      32.196 -40.480   4.457  1.00 47.04           N  
ANISOU  886  N   ALA B  11     7411   5711   4749    147   1816    -57       N  
ATOM    887  CA  ALA B  11      32.686 -39.326   3.702  1.00 51.80           C  
ANISOU  887  CA  ALA B  11     8091   6389   5203     80   1974    -15       C  
ATOM    888  C   ALA B  11      31.898 -38.004   3.725  1.00 50.84           C  
ANISOU  888  C   ALA B  11     7815   6409   5094   -140   1577     80       C  
ATOM    889  O   ALA B  11      31.407 -37.558   2.693  1.00 59.84           O  
ANISOU  889  O   ALA B  11     9406   7425   5905   -308   1432     85       O  
ATOM    890  CB  ALA B  11      32.894 -39.725   2.234  1.00 56.20           C  
ANISOU  890  CB  ALA B  11     9434   6639   5282     46   2238   -120       C  
ATOM    891  N   LEU B  12      31.790 -37.377   4.893  1.00 44.99           N  
ANISOU  891  N   LEU B  12     6484   5906   4706   -124   1420    168       N  
ATOM    892  CA  LEU B  12      31.333 -35.992   4.971  1.00 39.75           C  
ANISOU  892  CA  LEU B  12     5663   5350   4089   -265   1210    272       C  
ATOM    893  C   LEU B  12      32.458 -35.050   4.558  1.00 40.57           C  
ANISOU  893  C   LEU B  12     5727   5524   4164   -263   1588    298       C  
ATOM    894  O   LEU B  12      33.565 -35.157   5.079  1.00 43.00           O  
ANISOU  894  O   LEU B  12     5691   5968   4677   -151   1900    292       O  
ATOM    895  CB  LEU B  12      30.875 -35.659   6.401  1.00 34.04           C  
ANISOU  895  CB  LEU B  12     4414   4802   3720   -243    986    339       C  
ATOM    896  CG  LEU B  12      30.239 -34.279   6.601  1.00 32.64           C  
ANISOU  896  CG  LEU B  12     4116   4675   3612   -354    793    455       C  
ATOM    897  CD1 LEU B  12      28.865 -34.214   5.940  1.00 35.55           C  
ANISOU  897  CD1 LEU B  12     4747   4915   3844   -459    414    554       C  
ATOM    898  CD2 LEU B  12      30.140 -33.906   8.081  1.00 26.03           C  
ANISOU  898  CD2 LEU B  12     2824   3983   3084   -304    731    489       C  
ATOM    899  N   PRO B  13      32.195 -34.126   3.616  1.00 41.40           N  
ANISOU  899  N   PRO B  13     6163   5538   4027   -395   1560    357       N  
ATOM    900  CA  PRO B  13      33.294 -33.241   3.207  1.00 45.37           C  
ANISOU  900  CA  PRO B  13     6641   6079   4520   -417   1973    394       C  
ATOM    901  C   PRO B  13      33.786 -32.413   4.384  1.00 45.70           C  
ANISOU  901  C   PRO B  13     6094   6332   4936   -458   2000    436       C  
ATOM    902  O   PRO B  13      32.992 -32.043   5.245  1.00 41.10           O  
ANISOU  902  O   PRO B  13     5299   5808   4510   -499   1670    466       O  
ATOM    903  CB  PRO B  13      32.647 -32.316   2.168  1.00 47.86           C  
ANISOU  903  CB  PRO B  13     7417   6248   4519   -554   1839    484       C  
ATOM    904  CG  PRO B  13      31.373 -32.976   1.786  1.00 49.75           C  
ANISOU  904  CG  PRO B  13     7988   6373   4541   -595   1381    483       C  
ATOM    905  CD  PRO B  13      30.928 -33.787   2.948  1.00 40.62           C  
ANISOU  905  CD  PRO B  13     6421   5319   3694   -530   1150    434       C  
ATOM    906  N   SER B  14      35.070 -32.142   4.462  1.00 49.00           N  
ANISOU  906  N   SER B  14     6253   6860   5503   -459   2388    448       N  
ATOM    907  CA  SER B  14      35.667 -31.247   5.431  1.00 50.42           C  
ANISOU  907  CA  SER B  14     5946   7226   5986   -587   2405    482       C  
ATOM    908  C   SER B  14      35.259 -29.832   5.318  1.00 45.97           C  
ANISOU  908  C   SER B  14     5516   6575   5374   -788   2322    535       C  
ATOM    909  O   SER B  14      35.187 -29.123   6.265  1.00 41.00           O  
ANISOU  909  O   SER B  14     4631   6021   4928   -907   2178    534       O  
ATOM    910  CB  SER B  14      37.144 -31.236   5.282  1.00 58.48           C  
ANISOU  910  CB  SER B  14     6675   8372   7173   -591   2844    524       C  
ATOM    911  OG  SER B  14      37.681 -32.210   6.074  1.00 66.29           O  
ANISOU  911  OG  SER B  14     7253   9545   8389   -426   2849    521       O  
ATOM    912  N   ASP B  15      35.125 -29.392   4.102  1.00 41.82           N  
ANISOU  912  N   ASP B  15     5446   5867   4578   -826   2477    590       N  
ATOM    913  CA  ASP B  15      34.775 -28.000   3.840  1.00 43.50           C  
ANISOU  913  CA  ASP B  15     5856   5950   4723   -987   2460    678       C  
ATOM    914  C   ASP B  15      33.780 -27.888   2.697  1.00 48.17           C  
ANISOU  914  C   ASP B  15     7025   6334   4945   -933   2307    767       C  
ATOM    915  O   ASP B  15      33.869 -28.626   1.722  1.00 48.45           O  
ANISOU  915  O   ASP B  15     7419   6290   4699   -857   2413    748       O  
ATOM    916  CB  ASP B  15      36.021 -27.185   3.482  1.00 51.50           C  
ANISOU  916  CB  ASP B  15     6793   6961   5813  -1161   2913    718       C  
ATOM    917  CG  ASP B  15      37.016 -27.101   4.621  1.00 54.76           C  
ANISOU  917  CG  ASP B  15     6596   7604   6605  -1292   2984    669       C  
ATOM    918  OD1 ASP B  15      36.929 -26.143   5.421  1.00 55.51           O  
ANISOU  918  OD1 ASP B  15     6545   7699   6845  -1492   2850    657       O  
ATOM    919  OD2 ASP B  15      37.891 -27.987   4.712  1.00 57.80           O1-
ANISOU  919  OD2 ASP B  15     6670   8160   7133  -1195   3172    656       O1-
ATOM    920  N   ILE B  16      32.836 -26.963   2.813  1.00 47.96           N  
ANISOU  920  N   ILE B  16     7113   6207   4905   -968   2059    879       N  
ATOM    921  CA  ILE B  16      31.995 -26.606   1.675  1.00 49.15           C  
ANISOU  921  CA  ILE B  16     7784   6179   4713   -935   1907   1032       C  
ATOM    922  C   ILE B  16      31.907 -25.095   1.549  1.00 47.79           C  
ANISOU  922  C   ILE B  16     7752   5854   4553  -1014   2028   1186       C  
ATOM    923  O   ILE B  16      31.655 -24.397   2.535  1.00 47.72           O  
ANISOU  923  O   ILE B  16     7476   5842   4815  -1041   1968   1202       O  
ATOM    924  CB  ILE B  16      30.561 -27.146   1.805  1.00 47.04           C  
ANISOU  924  CB  ILE B  16     7536   5923   4414   -830   1375   1107       C  
ATOM    925  CG1 ILE B  16      30.566 -28.666   1.961  1.00 43.03           C  
ANISOU  925  CG1 ILE B  16     6940   5515   3895   -778   1250    950       C  
ATOM    926  CG2 ILE B  16      29.740 -26.723   0.587  1.00 47.65           C  
ANISOU  926  CG2 ILE B  16     8126   5849   4128   -819   1154   1311       C  
ATOM    927  CD1 ILE B  16      29.189 -29.252   2.205  1.00 45.42           C  
ANISOU  927  CD1 ILE B  16     7180   5838   4240   -732    732   1025       C  
ATOM    928  N   SER B  17      32.122 -24.597   0.339  1.00 44.80           N  
ANISOU  928  N   SER B  17     7855   5314   3854  -1046   2232   1300       N  
ATOM    929  CA  SER B  17      31.990 -23.177   0.057  1.00 53.08           C  
ANISOU  929  CA  SER B  17     9138   6165   4866  -1099   2370   1481       C  
ATOM    930  C   SER B  17      30.754 -22.931  -0.795  1.00 56.92           C  
ANISOU  930  C   SER B  17    10052   6528   5047   -959   2005   1727       C  
ATOM    931  O   SER B  17      30.466 -23.683  -1.734  1.00 56.86           O  
ANISOU  931  O   SER B  17    10394   6531   4680   -915   1821   1751       O  
ATOM    932  CB  SER B  17      33.238 -22.650  -0.659  1.00 62.71           C  
ANISOU  932  CB  SER B  17    10578   7275   5972  -1252   2929   1477       C  
ATOM    933  OG  SER B  17      34.380 -22.806   0.166  1.00 66.08           O  
ANISOU  933  OG  SER B  17    10515   7851   6742  -1406   3219   1303       O  
ATOM    934  N   ILE B  18      30.032 -21.868  -0.471  1.00 46.29           N  
ANISOU  934  N   ILE B  18     8694   4881   4014  -1773   -741    904       N  
ATOM    935  CA  ILE B  18      28.775 -21.585  -1.135  1.00 46.82           C  
ANISOU  935  CA  ILE B  18     8903   4784   4103  -1652   -954    975       C  
ATOM    936  C   ILE B  18      28.496 -20.088  -1.158  1.00 51.74           C  
ANISOU  936  C   ILE B  18     9832   5130   4696  -1696  -1170   1115       C  
ATOM    937  O   ILE B  18      28.797 -19.377  -0.198  1.00 49.71           O  
ANISOU  937  O   ILE B  18     9620   4747   4522  -1680  -1177   1113       O  
ATOM    938  CB  ILE B  18      27.612 -22.304  -0.436  1.00 43.72           C  
ANISOU  938  CB  ILE B  18     8313   4354   3945  -1333   -983    871       C  
ATOM    939  CG1 ILE B  18      26.316 -22.087  -1.218  1.00 46.57           C  
ANISOU  939  CG1 ILE B  18     8794   4594   4307  -1211  -1200    932       C  
ATOM    940  CG2 ILE B  18      27.479 -21.822   1.008  1.00 42.54           C  
ANISOU  940  CG2 ILE B  18     8100   4079   3985  -1175   -989    825       C  
ATOM    941  CD1 ILE B  18      25.093 -22.666  -0.552  1.00 45.29           C  
ANISOU  941  CD1 ILE B  18     8442   4412   4355   -917  -1250    837       C  
ATOM    942  N   ASP B  19      27.916 -19.617  -2.260  1.00 54.48           N  
ANISOU  942  N   ASP B  19    10401   5376   4923  -1747  -1355   1235       N  
ATOM    943  CA  ASP B  19      27.595 -18.201  -2.416  1.00 56.12           C  
ANISOU  943  CA  ASP B  19    10941   5291   5091  -1781  -1597   1381       C  
ATOM    944  C   ASP B  19      26.430 -17.778  -1.535  1.00 52.18           C  
ANISOU  944  C   ASP B  19    10437   4563   4827  -1440  -1764   1330       C  
ATOM    945  O   ASP B  19      25.422 -18.476  -1.432  1.00 46.78           O  
ANISOU  945  O   ASP B  19     9571   3930   4273  -1190  -1789   1243       O  
ATOM    946  CB  ASP B  19      27.265 -17.864  -3.878  1.00 58.90           C  
ANISOU  946  CB  ASP B  19    11533   5607   5240  -1923  -1763   1530       C  
ATOM    947  CG  ASP B  19      28.480 -17.910  -4.778  1.00 65.14           C  
ANISOU  947  CG  ASP B  19    12398   6600   5754  -2309  -1638   1609       C  
ATOM    948  OD1 ASP B  19      29.586 -17.573  -4.309  1.00 63.42           O  
ANISOU  948  OD1 ASP B  19    12192   6434   5472  -2512  -1515   1613       O  
ATOM    949  OD2 ASP B  19      28.325 -18.276  -5.966  1.00 73.15           O1-
ANISOU  949  OD2 ASP B  19    13450   7742   6601  -2415  -1665   1661       O1-
ATOM    950  N   GLU B  20      26.580 -16.618  -0.913  1.00 54.45           N  
ANISOU  950  N   GLU B  20    10925   4608   5155  -1440  -1882   1378       N  
ATOM    951  CA  GLU B  20      25.518 -16.006  -0.135  1.00 57.15           C  
ANISOU  951  CA  GLU B  20    11304   4718   5693  -1120  -2071   1328       C  
ATOM    952  C   GLU B  20      24.220 -16.006  -0.939  1.00 53.68           C  
ANISOU  952  C   GLU B  20    10933   4203   5260   -922  -2289   1366       C  
ATOM    953  O   GLU B  20      24.230 -15.738  -2.134  1.00 53.93           O  
ANISOU  953  O   GLU B  20    11179   4197   5113  -1082  -2401   1506       O  
ATOM    954  CB  GLU B  20      25.929 -14.577   0.211  1.00 65.60           C  
ANISOU  954  CB  GLU B  20    12695   5493   6737  -1213  -2224   1416       C  
ATOM    955  CG  GLU B  20      25.042 -13.869   1.203  1.00 73.50           C  
ANISOU  955  CG  GLU B  20    13728   6257   7941   -882  -2401   1330       C  
ATOM    956  CD  GLU B  20      25.490 -12.437   1.442  1.00 78.94           C  
ANISOU  956  CD  GLU B  20    14780   6623   8590   -994  -2571   1418       C  
ATOM    957  OE1 GLU B  20      26.314 -11.926   0.651  1.00 78.53           O  
ANISOU  957  OE1 GLU B  20    14996   6508   8335  -1334  -2598   1582       O  
ATOM    958  OE2 GLU B  20      25.021 -11.826   2.422  1.00 82.42           O1-
ANISOU  958  OE2 GLU B  20    15240   6882   9195   -750  -2681   1321       O1-
ATOM    959  N   GLY B  21      23.103 -16.321  -0.290  1.00 53.91           N  
ANISOU  959  N   GLY B  21    10767   4236   5480   -582  -2348   1241       N  
ATOM    960  CA  GLY B  21      21.808 -16.270  -0.949  1.00 56.05           C  
ANISOU  960  CA  GLY B  21    11080   4452   5765   -367  -2567   1260       C  
ATOM    961  C   GLY B  21      21.360 -17.566  -1.612  1.00 53.36           C  
ANISOU  961  C   GLY B  21    10502   4380   5394   -359  -2461   1215       C  
ATOM    962  O   GLY B  21      20.182 -17.729  -1.935  1.00 54.99           O  
ANISOU  962  O   GLY B  21    10651   4600   5644   -145  -2610   1189       O  
ATOM    963  N   LYS B  22      22.293 -18.489  -1.814  1.00 48.74           N  
ANISOU  963  N   LYS B  22     9777   4013   4731   -586  -2212   1196       N  
ATOM    964  CA  LYS B  22      21.974 -19.767  -2.444  1.00 45.61           C  
ANISOU  964  CA  LYS B  22     9170   3859   4302   -597  -2105   1141       C  
ATOM    965  C   LYS B  22      21.497 -20.811  -1.442  1.00 45.56           C  
ANISOU  965  C   LYS B  22     8815   4008   4487   -401  -1965    972       C  
ATOM    966  O   LYS B  22      21.592 -20.619  -0.215  1.00 43.18           O  
ANISOU  966  O   LYS B  22     8409   3666   4332   -286  -1910    895       O  
ATOM    967  CB  LYS B  22      23.181 -20.294  -3.222  1.00 44.94           C  
ANISOU  967  CB  LYS B  22     9107   3942   4027   -919  -1920   1186       C  
ATOM    968  CG  LYS B  22      23.520 -19.447  -4.452  1.00 52.07           C  
ANISOU  968  CG  LYS B  22    10335   4752   4697  -1148  -2061   1364       C  
ATOM    969  CD  LYS B  22      24.685 -20.016  -5.241  1.00 54.82           C  
ANISOU  969  CD  LYS B  22    10668   5324   4837  -1466  -1870   1387       C  
ATOM    970  CE  LYS B  22      24.898 -19.229  -6.537  1.00 61.67           C  
ANISOU  970  CE  LYS B  22    11850   6133   5451  -1709  -2021   1573       C  
ATOM    971  NZ  LYS B  22      26.108 -19.694  -7.262  1.00 62.62           N1+
ANISOU  971  NZ  LYS B  22    11942   6505   5344  -2035  -1828   1584       N1+
ATOM    972  N   VAL B  23      20.988 -21.920  -1.968  1.00 38.50           N  
ANISOU  972  N   VAL B  23     7749   3296   3582   -379  -1912    918       N  
ATOM    973  CA  VAL B  23      20.591 -23.039  -1.127  1.00 39.35           C  
ANISOU  973  CA  VAL B  23     7542   3563   3847   -247  -1775    774       C  
ATOM    974  C   VAL B  23      21.767 -23.965  -0.806  1.00 39.94           C  
ANISOU  974  C   VAL B  23     7478   3784   3912   -412  -1510    715       C  
ATOM    975  O   VAL B  23      22.439 -24.474  -1.709  1.00 39.66           O  
ANISOU  975  O   VAL B  23     7483   3852   3733   -602  -1420    737       O  
ATOM    976  CB  VAL B  23      19.466 -23.867  -1.768  1.00 42.23           C  
ANISOU  976  CB  VAL B  23     7782   4051   4212   -153  -1845    732       C  
ATOM    977  CG1 VAL B  23      19.099 -25.033  -0.864  1.00 42.49           C  
ANISOU  977  CG1 VAL B  23     7507   4239   4396    -55  -1706    597       C  
ATOM    978  CG2 VAL B  23      18.261 -22.992  -2.020  1.00 48.10           C  
ANISOU  978  CG2 VAL B  23     8629   4679   4969     44  -2111    774       C  
ATOM    979  N   LEU B  24      22.017 -24.175   0.485  1.00 34.02           N  
ANISOU  979  N   LEU B  24     6560   3056   3310   -330  -1393    633       N  
ATOM    980  CA  LEU B  24      23.010 -25.152   0.913  1.00 34.82           C  
ANISOU  980  CA  LEU B  24     6501   3303   3426   -437  -1157    563       C  
ATOM    981  C   LEU B  24      22.342 -26.516   1.056  1.00 37.69           C  
ANISOU  981  C   LEU B  24     6634   3807   3879   -347  -1094    466       C  
ATOM    982  O   LEU B  24      21.302 -26.641   1.700  1.00 38.12           O  
ANISOU  982  O   LEU B  24     6559   3863   4062   -172  -1167    420       O  
ATOM    983  CB  LEU B  24      23.655 -24.741   2.246  1.00 36.30           C  
ANISOU  983  CB  LEU B  24     6625   3452   3717   -407  -1064    530       C  
ATOM    984  CG  LEU B  24      24.602 -25.778   2.866  1.00 36.22           C  
ANISOU  984  CG  LEU B  24     6424   3595   3744   -473   -833    450       C  
ATOM    985  CD1 LEU B  24      25.853 -25.970   2.010  1.00 34.47           C  
ANISOU  985  CD1 LEU B  24     6287   3464   3346   -701   -716    476       C  
ATOM    986  CD2 LEU B  24      24.986 -25.392   4.291  1.00 36.73           C  
ANISOU  986  CD2 LEU B  24     6397   3632   3928   -406   -764    411       C  
ATOM    987  N   THR B  25      22.937 -27.531   0.442  1.00 35.21           N  
ANISOU  987  N   THR B  25     6272   3618   3488   -473   -966    429       N  
ATOM    988  CA  THR B  25      22.435 -28.894   0.539  1.00 31.23           C  
ANISOU  988  CA  THR B  25     5580   3225   3061   -418   -905    338       C  
ATOM    989  C   THR B  25      23.597 -29.799   0.873  1.00 31.74           C  
ANISOU  989  C   THR B  25     5547   3384   3128   -502   -702    268       C  
ATOM    990  O   THR B  25      24.554 -29.895   0.103  1.00 36.05           O  
ANISOU  990  O   THR B  25     6173   3991   3532   -646   -625    268       O  
ATOM    991  CB  THR B  25      21.829 -29.380  -0.803  1.00 34.74           C  
ANISOU  991  CB  THR B  25     6084   3722   3395   -468   -989    342       C  
ATOM    992  CG2 THR B  25      21.366 -30.828  -0.692  1.00 32.19           C  
ANISOU  992  CG2 THR B  25     5585   3497   3149   -436   -927    243       C  
ATOM    993  OG1 THR B  25      20.711 -28.559  -1.157  1.00 34.82           O  
ANISOU  993  OG1 THR B  25     6180   3655   3396   -373  -1193    407       O  
ATOM    994  N   VAL B  26      23.520 -30.456   2.021  1.00 27.53           N  
ANISOU  994  N   VAL B  26     4837   2879   2744   -411   -622    205       N  
ATOM    995  CA  VAL B  26      24.559 -31.384   2.444  1.00 27.98           C  
ANISOU  995  CA  VAL B  26     4793   3017   2821   -455   -448    134       C  
ATOM    996  C   VAL B  26      23.954 -32.751   2.682  1.00 29.21           C  
ANISOU  996  C   VAL B  26     4809   3215   3075   -395   -429     62       C  
ATOM    997  O   VAL B  26      23.352 -32.983   3.721  1.00 27.24           O  
ANISOU  997  O   VAL B  26     4433   2956   2960   -303   -440     54       O  
ATOM    998  CB  VAL B  26      25.239 -30.928   3.736  1.00 29.59           C  
ANISOU  998  CB  VAL B  26     4927   3207   3108   -421   -361    137       C  
ATOM    999  CG1 VAL B  26      26.470 -31.780   3.997  1.00 30.59           C  
ANISOU  999  CG1 VAL B  26     4971   3430   3220   -472   -189     68       C  
ATOM   1000  CG2 VAL B  26      25.619 -29.459   3.638  1.00 32.14           C  
ANISOU 1000  CG2 VAL B  26     5404   3454   3354   -478   -413    216       C  
ATOM   1001  N   ALA B  27      24.087 -33.646   1.702  1.00 26.00           N  
ANISOU 1001  N   ALA B  27     4432   2858   2590   -459   -409      8       N  
ATOM   1002  CA  ALA B  27      23.614 -35.015   1.855  1.00 24.91           C  
ANISOU 1002  CA  ALA B  27     4194   2738   2534   -426   -396    -65       C  
ATOM   1003  C   ALA B  27      24.784 -35.867   2.301  1.00 31.44           C  
ANISOU 1003  C   ALA B  27     4963   3599   3385   -430   -249   -140       C  
ATOM   1004  O   ALA B  27      25.926 -35.585   1.952  1.00 34.15           O  
ANISOU 1004  O   ALA B  27     5354   3996   3626   -484   -161   -162       O  
ATOM   1005  CB  ALA B  27      23.026 -35.558   0.532  1.00 25.18           C  
ANISOU 1005  CB  ALA B  27     4300   2796   2473   -482   -474    -98       C  
ATOM   1006  N   CYS B  28      24.494 -36.913   3.064  1.00 27.72           N  
ANISOU 1006  N   CYS B  28     4389   3105   3038   -377   -230   -179       N  
ATOM   1007  CA  CYS B  28      25.532 -37.789   3.574  1.00 30.45           C  
ANISOU 1007  CA  CYS B  28     4683   3465   3421   -351   -114   -250       C  
ATOM   1008  C   CYS B  28      24.986 -39.208   3.770  1.00 31.40           C  
ANISOU 1008  C   CYS B  28     4765   3532   3634   -329   -146   -302       C  
ATOM   1009  O   CYS B  28      23.901 -39.396   4.327  1.00 32.22           O  
ANISOU 1009  O   CYS B  28     4811   3603   3829   -322   -222   -254       O  
ATOM   1010  CB  CYS B  28      26.063 -37.228   4.908  1.00 35.47           C  
ANISOU 1010  CB  CYS B  28     5231   4110   4137   -301    -43   -204       C  
ATOM   1011  SG  CYS B  28      27.658 -37.875   5.364  1.00 49.49           S  
ANISOU 1011  SG  CYS B  28     6956   5942   5905   -269    105   -284       S  
ATOM   1012  N   ALA B  29      25.734 -40.206   3.310  1.00 25.36           N  
ANISOU 1012  N   ALA B  29     4036   2764   2837   -321    -96   -405       N  
ATOM   1013  CA  ALA B  29      25.357 -41.597   3.538  1.00 26.61           C  
ANISOU 1013  CA  ALA B  29     4191   2837   3085   -302   -134   -457       C  
ATOM   1014  C   ALA B  29      25.963 -42.071   4.868  1.00 26.36           C  
ANISOU 1014  C   ALA B  29     4080   2770   3167   -229    -72   -445       C  
ATOM   1015  O   ALA B  29      26.971 -41.532   5.325  1.00 24.78           O  
ANISOU 1015  O   ALA B  29     3836   2633   2948   -185     23   -444       O  
ATOM   1016  CB  ALA B  29      25.806 -42.483   2.397  1.00 28.64           C  
ANISOU 1016  CB  ALA B  29     4539   3086   3256   -308   -133   -590       C  
ATOM   1017  N   PHE B  30      25.328 -43.054   5.494  1.00 27.79           N  
ANISOU 1017  N   PHE B  30     4245   2858   3455   -234   -130   -427       N  
ATOM   1018  CA  PHE B  30      25.849 -43.625   6.740  1.00 30.25           C  
ANISOU 1018  CA  PHE B  30     4498   3126   3870   -173    -90   -404       C  
ATOM   1019  C   PHE B  30      25.444 -45.089   6.871  1.00 34.69           C  
ANISOU 1019  C   PHE B  30     5124   3549   4507   -191   -169   -431       C  
ATOM   1020  O   PHE B  30      24.548 -45.565   6.166  1.00 31.85           O  
ANISOU 1020  O   PHE B  30     4831   3139   4132   -271   -258   -450       O  
ATOM   1021  CB  PHE B  30      25.409 -42.812   7.975  1.00 25.84           C  
ANISOU 1021  CB  PHE B  30     3816   2624   3378   -181    -77   -284       C  
ATOM   1022  CG  PHE B  30      23.911 -42.725   8.155  1.00 28.41           C  
ANISOU 1022  CG  PHE B  30     4099   2956   3740   -263   -176   -211       C  
ATOM   1023  CD1 PHE B  30      23.204 -43.775   8.716  1.00 25.59           C  
ANISOU 1023  CD1 PHE B  30     3729   2536   3457   -323   -243   -177       C  
ATOM   1024  CD2 PHE B  30      23.213 -41.588   7.761  1.00 27.34           C  
ANISOU 1024  CD2 PHE B  30     3936   2898   3554   -282   -210   -177       C  
ATOM   1025  CE1 PHE B  30      21.824 -43.703   8.864  1.00 29.11           C  
ANISOU 1025  CE1 PHE B  30     4112   3033   3917   -413   -330   -119       C  
ATOM   1026  CE2 PHE B  30      21.828 -41.507   7.895  1.00 24.58           C  
ANISOU 1026  CE2 PHE B  30     3526   2588   3227   -338   -306   -128       C  
ATOM   1027  CZ  PHE B  30      21.131 -42.565   8.451  1.00 28.23           C  
ANISOU 1027  CZ  PHE B  30     3950   3024   3753   -409   -359   -103       C  
ATOM   1028  N   THR B  31      26.130 -45.803   7.756  1.00 28.13           N  
ANISOU 1028  N   THR B  31     4286   2654   3750   -122   -145   -432       N  
ATOM   1029  CA  THR B  31      25.756 -47.167   8.077  1.00 25.95           C  
ANISOU 1029  CA  THR B  31     4090   2217   3554   -148   -236   -431       C  
ATOM   1030  C   THR B  31      25.583 -47.326   9.592  1.00 27.88           C  
ANISOU 1030  C   THR B  31     4251   2447   3894   -166   -241   -304       C  
ATOM   1031  O   THR B  31      25.882 -46.408  10.363  1.00 24.25           O  
ANISOU 1031  O   THR B  31     3668   2107   3439   -134   -163   -241       O  
ATOM   1032  CB  THR B  31      26.796 -48.164   7.559  1.00 31.03           C  
ANISOU 1032  CB  THR B  31     4848   2755   4188    -31   -237   -574       C  
ATOM   1033  CG2 THR B  31      26.848 -48.128   6.014  1.00 37.73           C  
ANISOU 1033  CG2 THR B  31     5775   3632   4926    -34   -241   -710       C  
ATOM   1034  OG1 THR B  31      28.078 -47.805   8.077  1.00 34.18           O  
ANISOU 1034  OG1 THR B  31     5174   3236   4578    104   -133   -603       O  
ATOM   1035  N   GLY B  32      25.100 -48.492  10.003  1.00 29.54           N  
ANISOU 1035  N   GLY B  32     4540   2512   4173   -230   -338   -266       N  
ATOM   1036  CA  GLY B  32      24.836 -48.759  11.398  1.00 28.33           C  
ANISOU 1036  CA  GLY B  32     4322   2350   4094   -281   -359   -133       C  
ATOM   1037  C   GLY B  32      23.629 -49.661  11.560  1.00 30.30           C  
ANISOU 1037  C   GLY B  32     4635   2503   4375   -460   -485    -59       C  
ATOM   1038  O   GLY B  32      22.613 -49.494  10.889  1.00 26.59           O  
ANISOU 1038  O   GLY B  32     4160   2078   3865   -575   -533    -65       O  
ATOM   1039  N   GLU B  33      23.741 -50.618  12.471  1.00 27.91           N  
ANISOU 1039  N   GLU B  33     4393   2075   4136   -494   -546     17       N  
ATOM   1040  CA  GLU B  33      22.645 -51.522  12.765  1.00 34.38           C  
ANISOU 1040  CA  GLU B  33     5281   2806   4977   -700   -671    109       C  
ATOM   1041  C   GLU B  33      22.597 -51.761  14.273  1.00 34.90           C  
ANISOU 1041  C   GLU B  33     5279   2897   5085   -769   -683    265       C  
ATOM   1042  O   GLU B  33      23.590 -52.198  14.860  1.00 31.89           O  
ANISOU 1042  O   GLU B  33     4957   2411   4749   -650   -676    277       O  
ATOM   1043  CB  GLU B  33      22.846 -52.845  12.030  1.00 38.86           C  
ANISOU 1043  CB  GLU B  33     6091   3105   5568   -699   -785     24       C  
ATOM   1044  CG  GLU B  33      21.798 -53.884  12.351  1.00 50.79           C  
ANISOU 1044  CG  GLU B  33     7709   4491   7098   -937   -929    125       C  
ATOM   1045  CD  GLU B  33      20.425 -53.522  11.811  1.00 58.47           C  
ANISOU 1045  CD  GLU B  33     8599   5611   8007  -1136   -957    142       C  
ATOM   1046  OE1 GLU B  33      20.351 -52.726  10.848  1.00 57.84           O  
ANISOU 1046  OE1 GLU B  33     8455   5647   7875  -1064   -898     41       O  
ATOM   1047  OE2 GLU B  33      19.418 -54.034  12.354  1.00 63.20           O1-
ANISOU 1047  OE2 GLU B  33     9194   6223   8597  -1370  -1044    258       O1-
ATOM   1048  N   PRO B  34      21.449 -51.467  14.906  1.00 34.42           N  
ANISOU 1048  N   PRO B  34     5082   2998   4997   -958   -701    379       N  
ATOM   1049  CA  PRO B  34      20.241 -50.924  14.271  1.00 28.43           C  
ANISOU 1049  CA  PRO B  34     4229   2393   4179  -1083   -717    361       C  
ATOM   1050  C   PRO B  34      20.439 -49.513  13.746  1.00 28.31           C  
ANISOU 1050  C   PRO B  34     4080   2550   4128   -936   -609    279       C  
ATOM   1051  O   PRO B  34      21.416 -48.843  14.097  1.00 26.49           O  
ANISOU 1051  O   PRO B  34     3792   2359   3912   -774   -510    259       O  
ATOM   1052  CB  PRO B  34      19.217 -50.897  15.414  1.00 33.92           C  
ANISOU 1052  CB  PRO B  34     4770   3266   4851  -1282   -745    505       C  
ATOM   1053  CG  PRO B  34      19.761 -51.867  16.454  1.00 34.09           C  
ANISOU 1053  CG  PRO B  34     4891   3142   4921  -1327   -789    614       C  
ATOM   1054  CD  PRO B  34      21.244 -51.735  16.343  1.00 34.83           C  
ANISOU 1054  CD  PRO B  34     5059   3108   5065  -1069   -719    537       C  
ATOM   1055  N   THR B  35      19.504 -49.066  12.913  1.00 30.48           N  
ANISOU 1055  N   THR B  35     4310   2924   4348  -1002   -638    237       N  
ATOM   1056  CA  THR B  35      19.593 -47.749  12.296  1.00 31.51           C  
ANISOU 1056  CA  THR B  35     4348   3188   4435   -877   -565    168       C  
ATOM   1057  C   THR B  35      19.864 -46.683  13.345  1.00 27.01           C  
ANISOU 1057  C   THR B  35     3602   2782   3877   -792   -475    219       C  
ATOM   1058  O   THR B  35      19.146 -46.596  14.334  1.00 28.81           O  
ANISOU 1058  O   THR B  35     3690   3150   4107   -886   -489    302       O  
ATOM   1059  CB  THR B  35      18.287 -47.381  11.574  1.00 33.87           C  
ANISOU 1059  CB  THR B  35     4583   3614   4672   -978   -632    150       C  
ATOM   1060  CG2 THR B  35      18.450 -46.059  10.822  1.00 28.55           C  
ANISOU 1060  CG2 THR B  35     3861   3035   3952   -839   -580     83       C  
ATOM   1061  OG1 THR B  35      17.942 -48.422  10.652  1.00 43.03           O  
ANISOU 1061  OG1 THR B  35     5902   4633   5816  -1084   -723    103       O  
ATOM   1062  N   PRO B  36      20.904 -45.870  13.126  1.00 26.28           N  
ANISOU 1062  N   PRO B  36     3516   2688   3783   -627   -382    162       N  
ATOM   1063  CA  PRO B  36      21.327 -44.852  14.097  1.00 28.09           C  
ANISOU 1063  CA  PRO B  36     3601   3048   4023   -541   -294    197       C  
ATOM   1064  C   PRO B  36      20.391 -43.655  14.166  1.00 28.39           C  
ANISOU 1064  C   PRO B  36     3492   3271   4025   -540   -301    200       C  
ATOM   1065  O   PRO B  36      19.731 -43.318  13.189  1.00 24.54           O  
ANISOU 1065  O   PRO B  36     3029   2802   3493   -552   -354    156       O  
ATOM   1066  CB  PRO B  36      22.680 -44.367  13.560  1.00 27.72           C  
ANISOU 1066  CB  PRO B  36     3630   2940   3963   -392   -207    120       C  
ATOM   1067  CG  PRO B  36      22.991 -45.198  12.352  1.00 29.47           C  
ANISOU 1067  CG  PRO B  36     4022   3009   4164   -388   -246     39       C  
ATOM   1068  CD  PRO B  36      21.745 -45.897  11.920  1.00 26.16           C  
ANISOU 1068  CD  PRO B  36     3642   2558   3739   -530   -358     56       C  
ATOM   1069  N   GLU B  37      20.373 -42.996  15.316  1.00 22.79           N  
ANISOU 1069  N   GLU B  37     2631   2698   3331   -511   -254    242       N  
ATOM   1070  CA  GLU B  37      19.675 -41.736  15.465  1.00 22.73           C  
ANISOU 1070  CA  GLU B  37     2486   2856   3295   -460   -259    222       C  
ATOM   1071  C   GLU B  37      20.583 -40.655  14.919  1.00 20.87           C  
ANISOU 1071  C   GLU B  37     2318   2567   3044   -322   -197    165       C  
ATOM   1072  O   GLU B  37      21.776 -40.619  15.227  1.00 20.81           O  
ANISOU 1072  O   GLU B  37     2351   2500   3054   -265   -114    162       O  
ATOM   1073  CB  GLU B  37      19.394 -41.464  16.949  1.00 24.61           C  
ANISOU 1073  CB  GLU B  37     2537   3265   3549   -476   -228    272       C  
ATOM   1074  CG  GLU B  37      18.576 -40.217  17.233  1.00 27.20           C  
ANISOU 1074  CG  GLU B  37     2707   3780   3849   -406   -247    231       C  
ATOM   1075  CD  GLU B  37      18.065 -40.180  18.687  1.00 29.97           C  
ANISOU 1075  CD  GLU B  37     2849   4343   4197   -454   -231    270       C  
ATOM   1076  OE1 GLU B  37      17.151 -40.960  19.032  1.00 31.10           O  
ANISOU 1076  OE1 GLU B  37     2904   4601   4313   -601   -284    316       O  
ATOM   1077  OE2 GLU B  37      18.597 -39.381  19.476  1.00 30.81           O1-
ANISOU 1077  OE2 GLU B  37     2880   4511   4316   -360   -165    252       O1-
ATOM   1078  N   VAL B  38      20.010 -39.760  14.127  1.00 21.57           N  
ANISOU 1078  N   VAL B  38     2416   2688   3091   -278   -246    123       N  
ATOM   1079  CA  VAL B  38      20.778 -38.734  13.439  1.00 20.29           C  
ANISOU 1079  CA  VAL B  38     2351   2463   2896   -183   -211     82       C  
ATOM   1080  C   VAL B  38      20.583 -37.377  14.096  1.00 21.19           C  
ANISOU 1080  C   VAL B  38     2368   2671   3012    -92   -207     73       C  
ATOM   1081  O   VAL B  38      19.458 -36.939  14.316  1.00 21.08           O  
ANISOU 1081  O   VAL B  38     2247   2769   2994    -70   -283     64       O  
ATOM   1082  CB  VAL B  38      20.337 -38.632  11.943  1.00 25.59           C  
ANISOU 1082  CB  VAL B  38     3143   3074   3505   -196   -287     47       C  
ATOM   1083  CG1 VAL B  38      21.032 -37.479  11.257  1.00 22.11           C  
ANISOU 1083  CG1 VAL B  38     2806   2582   3012   -125   -264     23       C  
ATOM   1084  CG2 VAL B  38      20.597 -39.948  11.214  1.00 24.37           C  
ANISOU 1084  CG2 VAL B  38     3100   2816   3344   -276   -292     32       C  
ATOM   1085  N   THR B  39      21.683 -36.702  14.392  1.00 19.46           N  
ANISOU 1085  N   THR B  39     2186   2415   2793    -36   -125     65       N  
ATOM   1086  CA  THR B  39      21.603 -35.367  14.948  1.00 21.96           C  
ANISOU 1086  CA  THR B  39     2447   2787   3111     50   -129     46       C  
ATOM   1087  C   THR B  39      22.526 -34.403  14.197  1.00 20.95           C  
ANISOU 1087  C   THR B  39     2474   2553   2932     81   -104     29       C  
ATOM   1088  O   THR B  39      23.736 -34.617  14.149  1.00 21.58           O  
ANISOU 1088  O   THR B  39     2615   2588   2996     51    -10     32       O  
ATOM   1089  CB  THR B  39      21.979 -35.362  16.463  1.00 24.78           C  
ANISOU 1089  CB  THR B  39     2659   3242   3514     64    -52     59       C  
ATOM   1090  CG2 THR B  39      21.782 -33.983  17.059  1.00 23.39           C  
ANISOU 1090  CG2 THR B  39     2422   3125   3339    160    -69     19       C  
ATOM   1091  OG1 THR B  39      21.158 -36.305  17.163  1.00 26.96           O  
ANISOU 1091  OG1 THR B  39     2798   3628   3819      2    -75     91       O  
ATOM   1092  N   TRP B  40      21.951 -33.350  13.618  1.00 21.00           N  
ANISOU 1092  N   TRP B  40     2543   2529   2905    136   -196     13       N  
ATOM   1093  CA  TRP B  40      22.749 -32.243  13.100  1.00 24.00           C  
ANISOU 1093  CA  TRP B  40     3074   2813   3232    148   -189     12       C  
ATOM   1094  C   TRP B  40      22.800 -31.149  14.158  1.00 25.46           C  
ANISOU 1094  C   TRP B  40     3199   3026   3451    227   -188    -10       C  
ATOM   1095  O   TRP B  40      21.793 -30.843  14.780  1.00 20.45           O  
ANISOU 1095  O   TRP B  40     2445   2468   2857    312   -259    -40       O  
ATOM   1096  CB  TRP B  40      22.138 -31.668  11.813  1.00 23.24           C  
ANISOU 1096  CB  TRP B  40     3120   2639   3071    160   -311     19       C  
ATOM   1097  CG  TRP B  40      22.384 -32.506  10.578  1.00 23.68           C  
ANISOU 1097  CG  TRP B  40     3280   2654   3064     70   -302     31       C  
ATOM   1098  CD1 TRP B  40      21.546 -33.442  10.038  1.00 24.00           C  
ANISOU 1098  CD1 TRP B  40     3289   2723   3105     44   -357     25       C  
ATOM   1099  CD2 TRP B  40      23.545 -32.472   9.733  1.00 23.72           C  
ANISOU 1099  CD2 TRP B  40     3430   2600   2984    -12   -234     39       C  
ATOM   1100  CE2 TRP B  40      23.338 -33.413   8.698  1.00 24.33           C  
ANISOU 1100  CE2 TRP B  40     3556   2672   3016    -68   -253     27       C  
ATOM   1101  CE3 TRP B  40      24.735 -31.738   9.750  1.00 25.95           C  
ANISOU 1101  CE3 TRP B  40     3797   2853   3211    -55   -160     48       C  
ATOM   1102  NE1 TRP B  40      22.113 -33.990   8.906  1.00 24.20           N  
ANISOU 1102  NE1 TRP B  40     3440   2698   3059    -36   -331     21       N  
ATOM   1103  CZ2 TRP B  40      24.280 -33.638   7.684  1.00 26.51           C  
ANISOU 1103  CZ2 TRP B  40     3952   2928   3192   -150   -198     13       C  
ATOM   1104  CZ3 TRP B  40      25.676 -31.965   8.739  1.00 26.69           C  
ANISOU 1104  CZ3 TRP B  40     4003   2941   3197   -153   -102     44       C  
ATOM   1105  CH2 TRP B  40      25.438 -32.904   7.722  1.00 26.46           C  
ANISOU 1105  CH2 TRP B  40     4011   2920   3124   -191   -120     22       C  
ATOM   1106  N   SER B  41      23.963 -30.548  14.354  1.00 22.35           N  
ANISOU 1106  N   SER B  41     2879   2583   3030    196   -111     -7       N  
ATOM   1107  CA  SER B  41      24.059 -29.441  15.291  1.00 18.85           C  
ANISOU 1107  CA  SER B  41     2405   2146   2613    263   -119    -37       C  
ATOM   1108  C   SER B  41      25.045 -28.387  14.810  1.00 23.62           C  
ANISOU 1108  C   SER B  41     3195   2631   3148    208   -109    -24       C  
ATOM   1109  O   SER B  41      25.914 -28.654  13.969  1.00 28.34           O  
ANISOU 1109  O   SER B  41     3903   3192   3672    100    -52      8       O  
ATOM   1110  CB  SER B  41      24.498 -29.966  16.666  1.00 21.37           C  
ANISOU 1110  CB  SER B  41     2545   2590   2986    260     -6    -50       C  
ATOM   1111  OG  SER B  41      25.803 -30.502  16.580  1.00 21.82           O  
ANISOU 1111  OG  SER B  41     2636   2644   3011    169    116    -26       O  
ATOM   1112  N   CYS B  42      24.889 -27.177  15.329  1.00 24.97           N  
ANISOU 1112  N   CYS B  42     3404   2749   3333    276   -172    -55       N  
ATOM   1113  CA  CYS B  42      25.925 -26.159  15.206  1.00 24.78           C  
ANISOU 1113  CA  CYS B  42     3543   2625   3248    197   -151    -42       C  
ATOM   1114  C   CYS B  42      25.915 -25.285  16.459  1.00 28.33           C  
ANISOU 1114  C   CYS B  42     3929   3085   3751    276   -160   -103       C  
ATOM   1115  O   CYS B  42      24.859 -25.037  17.038  1.00 26.64           O  
ANISOU 1115  O   CYS B  42     3616   2904   3602    422   -246   -161       O  
ATOM   1116  CB  CYS B  42      25.738 -25.318  13.938  1.00 24.09           C  
ANISOU 1116  CB  CYS B  42     3700   2369   3083    166   -280      2       C  
ATOM   1117  SG  CYS B  42      24.365 -24.151  13.956  1.00 32.03           S  
ANISOU 1117  SG  CYS B  42     4785   3252   4135    352   -501    -36       S  
ATOM   1118  N   GLY B  43      27.089 -24.827  16.879  1.00 25.40           N  
ANISOU 1118  N   GLY B  43     3601   2706   3342    178    -70   -103       N  
ATOM   1119  CA  GLY B  43      27.177 -24.004  18.073  1.00 24.30           C  
ANISOU 1119  CA  GLY B  43     3409   2580   3246    239    -72   -170       C  
ATOM   1120  C   GLY B  43      26.727 -24.780  19.304  1.00 23.75           C  
ANISOU 1120  C   GLY B  43     3068   2702   3256    330     -4   -220       C  
ATOM   1121  O   GLY B  43      26.209 -24.203  20.253  1.00 27.20           O  
ANISOU 1121  O   GLY B  43     3416   3177   3740    440    -48   -298       O  
ATOM   1122  N   GLY B  44      26.916 -26.096  19.270  1.00 23.81           N  
ANISOU 1122  N   GLY B  44     2950   2828   3269    281     94   -177       N  
ATOM   1123  CA  GLY B  44      26.579 -26.984  20.373  1.00 22.76           C  
ANISOU 1123  CA  GLY B  44     2578   2875   3194    327    159   -194       C  
ATOM   1124  C   GLY B  44      25.102 -27.291  20.544  1.00 28.61           C  
ANISOU 1124  C   GLY B  44     3197   3689   3986    438     65   -222       C  
ATOM   1125  O   GLY B  44      24.712 -27.970  21.506  1.00 25.05           O  
ANISOU 1125  O   GLY B  44     2543   3405   3569    458    107   -233       O  
ATOM   1126  N   ARG B  45      24.270 -26.801  19.622  1.00 24.20           N  
ANISOU 1126  N   ARG B  45     2753   3022   3418    501    -68   -232       N  
ATOM   1127  CA  ARG B  45      22.825 -26.989  19.734  1.00 24.43           C  
ANISOU 1127  CA  ARG B  45     2656   3146   3482    614   -169   -273       C  
ATOM   1128  C   ARG B  45      22.229 -27.742  18.533  1.00 28.36           C  
ANISOU 1128  C   ARG B  45     3210   3605   3959    580   -225   -218       C  
ATOM   1129  O   ARG B  45      22.569 -27.463  17.380  1.00 29.07           O  
ANISOU 1129  O   ARG B  45     3501   3539   4006    537   -265   -177       O  
ATOM   1130  CB  ARG B  45      22.126 -25.643  19.914  1.00 22.93           C  
ANISOU 1130  CB  ARG B  45     2508   2900   3303    772   -305   -368       C  
ATOM   1131  CG  ARG B  45      22.730 -24.829  21.071  1.00 23.51           C  
ANISOU 1131  CG  ARG B  45     2544   2996   3392    804   -258   -439       C  
ATOM   1132  CD  ARG B  45      21.995 -23.528  21.358  1.00 24.26           C  
ANISOU 1132  CD  ARG B  45     2676   3034   3507    987   -405   -558       C  
ATOM   1133  NE  ARG B  45      22.789 -22.744  22.302  1.00 29.25           N  
ANISOU 1133  NE  ARG B  45     3323   3645   4144    983   -354   -620       N  
ATOM   1134  CZ  ARG B  45      22.728 -22.862  23.630  1.00 33.35           C  
ANISOU 1134  CZ  ARG B  45     3622   4367   4684   1022   -282   -698       C  
ATOM   1135  NH1 ARG B  45      21.876 -23.710  24.202  1.00 31.13           N1+
ANISOU 1135  NH1 ARG B  45     3083   4331   4413   1061   -256   -720       N1+
ATOM   1136  NH2 ARG B  45      23.513 -22.112  24.391  1.00 32.53           N  
ANISOU 1136  NH2 ARG B  45     3555   4229   4577   1005   -240   -754       N  
ATOM   1137  N   LYS B  46      21.328 -28.677  18.817  1.00 26.18           N  
ANISOU 1137  N   LYS B  46     2758   3484   3704    585   -233   -218       N  
ATOM   1138  CA  LYS B  46      20.662 -29.456  17.777  1.00 25.97           C  
ANISOU 1138  CA  LYS B  46     2765   3444   3660    544   -290   -176       C  
ATOM   1139  C   LYS B  46      19.882 -28.566  16.811  1.00 28.57           C  
ANISOU 1139  C   LYS B  46     3216   3676   3962    647   -447   -206       C  
ATOM   1140  O   LYS B  46      19.169 -27.639  17.225  1.00 29.67           O  
ANISOU 1140  O   LYS B  46     3305   3852   4116    794   -545   -284       O  
ATOM   1141  CB  LYS B  46      19.717 -30.483  18.403  1.00 27.62           C  
ANISOU 1141  CB  LYS B  46     2751   3855   3887    519   -287   -178       C  
ATOM   1142  CG  LYS B  46      18.910 -31.315  17.399  1.00 32.18           C  
ANISOU 1142  CG  LYS B  46     3348   4437   4442    465   -355   -144       C  
ATOM   1143  CD  LYS B  46      18.171 -32.443  18.111  1.00 37.56           C  
ANISOU 1143  CD  LYS B  46     3824   5317   5132    384   -334   -127       C  
ATOM   1144  CE  LYS B  46      17.517 -33.423  17.145  1.00 43.32           C  
ANISOU 1144  CE  LYS B  46     4587   6037   5836    290   -390    -88       C  
ATOM   1145  NZ  LYS B  46      16.476 -32.747  16.350  1.00 49.20           N1+
ANISOU 1145  NZ  LYS B  46     5342   6804   6547    389   -527   -141       N1+
ATOM   1146  N   ILE B  47      20.011 -28.867  15.522  1.00 23.42           N  
ANISOU 1146  N   ILE B  47     2725   2908   3268    579   -478   -150       N  
ATOM   1147  CA  ILE B  47      19.229 -28.201  14.479  1.00 24.63           C  
ANISOU 1147  CA  ILE B  47     2999   2975   3383    660   -635   -158       C  
ATOM   1148  C   ILE B  47      17.935 -28.960  14.251  1.00 27.09           C  
ANISOU 1148  C   ILE B  47     3163   3436   3695    683   -708   -176       C  
ATOM   1149  O   ILE B  47      17.946 -30.168  14.003  1.00 27.49           O  
ANISOU 1149  O   ILE B  47     3166   3541   3740    561   -645   -135       O  
ATOM   1150  CB  ILE B  47      20.016 -28.113  13.163  1.00 23.88           C  
ANISOU 1150  CB  ILE B  47     3149   2704   3220    558   -635    -86       C  
ATOM   1151  CG1 ILE B  47      21.275 -27.262  13.379  1.00 23.59           C  
ANISOU 1151  CG1 ILE B  47     3256   2543   3164    513   -572    -69       C  
ATOM   1152  CG2 ILE B  47      19.128 -27.531  12.042  1.00 27.94           C  
ANISOU 1152  CG2 ILE B  47     3787   3141   3686    634   -811    -79       C  
ATOM   1153  CD1 ILE B  47      22.342 -27.440  12.296  1.00 27.46           C  
ANISOU 1153  CD1 ILE B  47     3935   2929   3569    358   -512      1       C  
ATOM   1154  N   HIS B  48      16.823 -28.246  14.371  1.00 27.65           N  
ANISOU 1154  N   HIS B  48     3159   3579   3769    844   -846   -247       N  
ATOM   1155  CA  HIS B  48      15.498 -28.839  14.274  1.00 33.94           C  
ANISOU 1155  CA  HIS B  48     3776   4566   4552    874   -923   -282       C  
ATOM   1156  C   HIS B  48      14.884 -28.534  12.914  1.00 37.37           C  
ANISOU 1156  C   HIS B  48     4350   4916   4933    924  -1072   -267       C  
ATOM   1157  O   HIS B  48      14.847 -27.384  12.486  1.00 38.49           O  
ANISOU 1157  O   HIS B  48     4643   4921   5060   1055  -1190   -283       O  
ATOM   1158  CB  HIS B  48      14.587 -28.305  15.389  1.00 35.70           C  
ANISOU 1158  CB  HIS B  48     3771   4995   4799   1035   -979   -395       C  
ATOM   1159  CG  HIS B  48      14.991 -28.752  16.763  1.00 40.34           C  
ANISOU 1159  CG  HIS B  48     4181   5724   5422    971   -839   -409       C  
ATOM   1160  CD2 HIS B  48      15.774 -28.163  17.699  1.00 40.38           C  
ANISOU 1160  CD2 HIS B  48     4187   5693   5462   1007   -765   -438       C  
ATOM   1161  ND1 HIS B  48      14.582 -29.951  17.306  1.00 42.96           N  
ANISOU 1161  ND1 HIS B  48     4312   6265   5747    839   -766   -386       N  
ATOM   1162  CE1 HIS B  48      15.099 -30.085  18.515  1.00 41.21           C  
ANISOU 1162  CE1 HIS B  48     3976   6130   5551    801   -655   -392       C  
ATOM   1163  NE2 HIS B  48      15.823 -29.012  18.780  1.00 41.84           N  
ANISOU 1163  NE2 HIS B  48     4167   6074   5658    907   -649   -430       N  
ATOM   1164  N   SER B  49      14.412 -29.568  12.233  1.00 37.42           N  
ANISOU 1164  N   SER B  49     4318   4995   4905    812  -1075   -232       N  
ATOM   1165  CA  SER B  49      13.780 -29.362  10.949  1.00 42.50           C  
ANISOU 1165  CA  SER B  49     5074   5588   5487    849  -1215   -218       C  
ATOM   1166  C   SER B  49      12.423 -28.715  11.186  1.00 47.25           C  
ANISOU 1166  C   SER B  49     5518   6355   6081   1048  -1375   -312       C  
ATOM   1167  O   SER B  49      11.686 -29.116  12.084  1.00 49.50           O  
ANISOU 1167  O   SER B  49     5545   6880   6381   1068  -1357   -378       O  
ATOM   1168  CB  SER B  49      13.630 -30.684  10.203  1.00 38.93           C  
ANISOU 1168  CB  SER B  49     4613   5182   4998    670  -1174   -171       C  
ATOM   1169  OG  SER B  49      13.214 -30.451   8.874  1.00 36.42           O  
ANISOU 1169  OG  SER B  49     4433   4796   4609    688  -1299   -149       O  
ATOM   1170  N   GLN B  50      12.108 -27.708  10.382  1.00 51.83           N  
ANISOU 1170  N   GLN B  50     6253   6814   6626   1194  -1537   -318       N  
ATOM   1171  CA  GLN B  50      10.865 -26.961  10.516  1.00 60.48           C  
ANISOU 1171  CA  GLN B  50     7223   8045   7710   1429  -1715   -420       C  
ATOM   1172  C   GLN B  50      10.238 -26.762   9.138  1.00 58.48           C  
ANISOU 1172  C   GLN B  50     7098   7739   7383   1477  -1882   -387       C  
ATOM   1173  O   GLN B  50      10.945 -26.465   8.180  1.00 57.16           O  
ANISOU 1173  O   GLN B  50     7202   7336   7180   1410  -1904   -292       O  
ATOM   1174  CB  GLN B  50      11.169 -25.602  11.147  1.00 69.36           C  
ANISOU 1174  CB  GLN B  50     8436   9037   8881   1630  -1782   -480       C  
ATOM   1175  CG  GLN B  50      12.281 -24.844  10.421  1.00 77.31           C  
ANISOU 1175  CG  GLN B  50     9793   9705   9876   1584  -1799   -381       C  
ATOM   1176  CD  GLN B  50      12.975 -23.818  11.301  1.00 85.53           C  
ANISOU 1176  CD  GLN B  50    10921  10603  10973   1678  -1786   -422       C  
ATOM   1177  NE2 GLN B  50      12.617 -23.796  12.582  1.00 86.87           N  
ANISOU 1177  NE2 GLN B  50    10850  10960  11198   1781  -1741   -539       N  
ATOM   1178  OE1 GLN B  50      13.828 -23.059  10.836  1.00 88.61           O  
ANISOU 1178  OE1 GLN B  50    11591  10728  11347   1642  -1816   -351       O  
ATOM   1179  N   GLU B  51       8.920 -26.922   9.031  1.00 59.88           N  
ANISOU 1179  N   GLU B  51     7074   8155   7523   1583  -2001   -464       N  
ATOM   1180  CA  GLU B  51       8.238 -26.710   7.751  1.00 61.70           C  
ANISOU 1180  CA  GLU B  51     7406   8362   7676   1646  -2176   -440       C  
ATOM   1181  C   GLU B  51       8.418 -25.268   7.281  1.00 64.61           C  
ANISOU 1181  C   GLU B  51     8031   8478   8039   1854  -2350   -426       C  
ATOM   1182  O   GLU B  51       8.806 -25.019   6.142  1.00 65.11           O  
ANISOU 1182  O   GLU B  51     8354   8338   8045   1796  -2418   -322       O  
ATOM   1183  CB  GLU B  51       6.752 -27.065   7.844  1.00 62.55           C  
ANISOU 1183  CB  GLU B  51     7218   8810   7739   1740  -2279   -544       C  
ATOM   1184  N   GLN B  52       8.139 -24.317   8.164  1.00 68.56           N  
ANISOU 1184  N   GLN B  52     8466   8991   8593   2092  -2431   -532       N  
ATOM   1185  CA  GLN B  52       8.420 -22.918   7.870  1.00 72.42           C  
ANISOU 1185  CA  GLN B  52     9230   9197   9091   2284  -2598   -520       C  
ATOM   1186  C   GLN B  52       9.821 -22.581   8.365  1.00 71.83           C  
ANISOU 1186  C   GLN B  52     9347   8876   9068   2159  -2458   -456       C  
ATOM   1187  O   GLN B  52      10.229 -23.029   9.439  1.00 72.56           O  
ANISOU 1187  O   GLN B  52     9273   9077   9220   2082  -2283   -501       O  
ATOM   1188  CB  GLN B  52       7.385 -22.004   8.530  1.00 75.85           C  
ANISOU 1188  CB  GLN B  52     9514   9752   9553   2633  -2782   -689       C  
ATOM   1189  N   GLY B  53      10.563 -21.804   7.582  1.00 66.97           N  
ANISOU 1189  N   GLY B  53     9079   7946   8421   2124  -2536   -346       N  
ATOM   1190  CA  GLY B  53      11.914 -21.432   7.966  1.00 60.37           C  
ANISOU 1190  CA  GLY B  53     8434   6889   7616   1986  -2412   -283       C  
ATOM   1191  C   GLY B  53      12.955 -21.902   6.969  1.00 52.36           C  
ANISOU 1191  C   GLY B  53     7634   5734   6526   1698  -2304   -122       C  
ATOM   1192  O   GLY B  53      12.622 -22.499   5.946  1.00 48.54           O  
ANISOU 1192  O   GLY B  53     7167   5308   5968   1612  -2332    -62       O  
ATOM   1193  N   ARG B  54      14.224 -21.650   7.273  1.00 44.35           N  
ANISOU 1193  N   ARG B  54     6771   4560   5522   1547  -2177    -65       N  
ATOM   1194  CA  ARG B  54      15.285 -21.892   6.306  1.00 44.41           C  
ANISOU 1194  CA  ARG B  54     6998   4437   5438   1288  -2092     76       C  
ATOM   1195  C   ARG B  54      15.941 -23.265   6.454  1.00 39.60           C  
ANISOU 1195  C   ARG B  54     6228   3987   4831   1069  -1844     88       C  
ATOM   1196  O   ARG B  54      16.647 -23.716   5.554  1.00 37.33           O  
ANISOU 1196  O   ARG B  54     6066   3661   4458    869  -1770    177       O  
ATOM   1197  CB  ARG B  54      16.338 -20.778   6.377  1.00 43.66           C  
ANISOU 1197  CB  ARG B  54     7187   4080   5322   1224  -2114    141       C  
ATOM   1198  CG  ARG B  54      15.800 -19.390   6.009  1.00 46.46           C  
ANISOU 1198  CG  ARG B  54     7786   4208   5659   1415  -2390    156       C  
ATOM   1199  CD  ARG B  54      16.913 -18.353   5.928  1.00 45.81           C  
ANISOU 1199  CD  ARG B  54     8026   3847   5533   1286  -2415    247       C  
ATOM   1200  NE  ARG B  54      17.667 -18.273   7.177  1.00 46.87           N  
ANISOU 1200  NE  ARG B  54     8064   3995   5748   1250  -2256    175       N  
ATOM   1201  CZ  ARG B  54      18.958 -18.569   7.305  1.00 45.23           C  
ANISOU 1201  CZ  ARG B  54     7897   3787   5502    992  -2057    236       C  
ATOM   1202  NH1 ARG B  54      19.664 -18.965   6.256  1.00 39.81           N1+
ANISOU 1202  NH1 ARG B  54     7339   3092   4693    746  -1985    360       N1+
ATOM   1203  NH2 ARG B  54      19.548 -18.465   8.494  1.00 43.11           N  
ANISOU 1203  NH2 ARG B  54     7526   3547   5309    985  -1929    161       N  
ATOM   1204  N   PHE B  55      15.686 -23.926   7.582  1.00 36.10           N  
ANISOU 1204  N   PHE B  55     5509   3729   4478   1113  -1728     -5       N  
ATOM   1205  CA  PHE B  55      16.393 -25.146   7.957  1.00 30.36           C  
ANISOU 1205  CA  PHE B  55     4644   3120   3770    928  -1503      3       C  
ATOM   1206  C   PHE B  55      15.537 -26.394   7.793  1.00 35.04           C  
ANISOU 1206  C   PHE B  55     5025   3923   4367    899  -1476    -28       C  
ATOM   1207  O   PHE B  55      14.420 -26.468   8.306  1.00 35.79           O  
ANISOU 1207  O   PHE B  55     4921   4178   4502   1038  -1551   -107       O  
ATOM   1208  CB  PHE B  55      16.905 -25.038   9.406  1.00 34.34           C  
ANISOU 1208  CB  PHE B  55     5015   3668   4363    954  -1380    -58       C  
ATOM   1209  CG  PHE B  55      17.931 -23.962   9.590  1.00 38.34           C  
ANISOU 1209  CG  PHE B  55     5732   3974   4860    928  -1375    -25       C  
ATOM   1210  CD1 PHE B  55      17.543 -22.640   9.742  1.00 43.33           C  
ANISOU 1210  CD1 PHE B  55     6491   4466   5507   1101  -1549    -59       C  
ATOM   1211  CD2 PHE B  55      19.282 -24.263   9.568  1.00 36.90           C  
ANISOU 1211  CD2 PHE B  55     5630   3745   4646    729  -1209     34       C  
ATOM   1212  CE1 PHE B  55      18.484 -21.643   9.880  1.00 43.80           C  
ANISOU 1212  CE1 PHE B  55     6770   4323   5550   1050  -1557    -23       C  
ATOM   1213  CE2 PHE B  55      20.227 -23.270   9.706  1.00 36.18           C  
ANISOU 1213  CE2 PHE B  55     5730   3488   4529    674  -1206     67       C  
ATOM   1214  CZ  PHE B  55      19.828 -21.960   9.859  1.00 40.07           C  
ANISOU 1214  CZ  PHE B  55     6366   3824   5036    821  -1380     44       C  
ATOM   1215  N   HIS B  56      16.069 -27.381   7.076  1.00 32.71           N  
ANISOU 1215  N   HIS B  56     4770   3636   4021    711  -1372     26       N  
ATOM   1216  CA  HIS B  56      15.316 -28.592   6.808  1.00 32.25           C  
ANISOU 1216  CA  HIS B  56     4552   3744   3959    654  -1356      2       C  
ATOM   1217  C   HIS B  56      16.230 -29.804   6.820  1.00 31.12           C  
ANISOU 1217  C   HIS B  56     4391   3615   3819    464  -1172     24       C  
ATOM   1218  O   HIS B  56      17.349 -29.760   6.315  1.00 33.94           O  
ANISOU 1218  O   HIS B  56     4911   3856   4127    357  -1093     71       O  
ATOM   1219  CB  HIS B  56      14.584 -28.475   5.465  1.00 36.44           C  
ANISOU 1219  CB  HIS B  56     5188   4261   4396    668  -1511     32       C  
ATOM   1220  CG  HIS B  56      13.732 -27.248   5.354  1.00 42.62           C  
ANISOU 1220  CG  HIS B  56     6017   5007   5169    878  -1717     13       C  
ATOM   1221  CD2 HIS B  56      14.032 -25.987   4.960  1.00 43.53           C  
ANISOU 1221  CD2 HIS B  56     6362   4930   5249    959  -1836     61       C  
ATOM   1222  ND1 HIS B  56      12.394 -27.236   5.690  1.00 43.37           N  
ANISOU 1222  ND1 HIS B  56     5912   5280   5289   1038  -1834    -67       N  
ATOM   1223  CE1 HIS B  56      11.906 -26.023   5.499  1.00 45.42           C  
ANISOU 1223  CE1 HIS B  56     6270   5453   5534   1237  -2022    -79       C  
ATOM   1224  NE2 HIS B  56      12.879 -25.246   5.054  1.00 45.19           N  
ANISOU 1224  NE2 HIS B  56     6518   5180   5472   1189  -2032      5       N  
ATOM   1225  N   ILE B  57      15.744 -30.889   7.400  1.00 30.19           N  
ANISOU 1225  N   ILE B  57     4075   3646   3751    422  -1113    -14       N  
ATOM   1226  CA  ILE B  57      16.514 -32.121   7.470  1.00 29.23           C  
ANISOU 1226  CA  ILE B  57     3940   3525   3643    264   -962     -1       C  
ATOM   1227  C   ILE B  57      15.608 -33.247   7.014  1.00 32.57           C  
ANISOU 1227  C   ILE B  57     4272   4055   4048    187  -1002    -19       C  
ATOM   1228  O   ILE B  57      14.458 -33.329   7.441  1.00 34.54           O  
ANISOU 1228  O   ILE B  57     4354   4454   4316    239  -1080    -52       O  
ATOM   1229  CB  ILE B  57      17.016 -32.405   8.901  1.00 28.51           C  
ANISOU 1229  CB  ILE B  57     3710   3482   3640    262   -837    -16       C  
ATOM   1230  CG1 ILE B  57      17.972 -31.298   9.375  1.00 29.02           C  
ANISOU 1230  CG1 ILE B  57     3865   3444   3717    321   -792     -5       C  
ATOM   1231  CG2 ILE B  57      17.683 -33.784   8.987  1.00 24.29           C  
ANISOU 1231  CG2 ILE B  57     3161   2945   3124    120   -710     -5       C  
ATOM   1232  CD1 ILE B  57      18.253 -31.331  10.902  1.00 24.13           C  
ANISOU 1232  CD1 ILE B  57     3084   2902   3180    353   -697    -31       C  
ATOM   1233  N   GLU B  58      16.122 -34.095   6.128  1.00 26.19           N  
ANISOU 1233  N   GLU B  58     3574   3185   3192     61   -954     -7       N  
ATOM   1234  CA  GLU B  58      15.391 -35.261   5.666  1.00 26.89           C  
ANISOU 1234  CA  GLU B  58     3605   3349   3262    -39   -986    -29       C  
ATOM   1235  C   GLU B  58      16.253 -36.486   5.903  1.00 27.83           C  
ANISOU 1235  C   GLU B  58     3746   3411   3417   -159   -857    -35       C  
ATOM   1236  O   GLU B  58      17.363 -36.577   5.375  1.00 28.75           O  
ANISOU 1236  O   GLU B  58     4003   3420   3501   -193   -780    -36       O  
ATOM   1237  CB  GLU B  58      15.093 -35.140   4.160  1.00 32.69           C  
ANISOU 1237  CB  GLU B  58     4478   4053   3890    -67  -1084    -26       C  
ATOM   1238  CG  GLU B  58      14.265 -36.284   3.582  1.00 39.16           C  
ANISOU 1238  CG  GLU B  58     5247   4953   4678   -176  -1133    -57       C  
ATOM   1239  CD  GLU B  58      12.806 -36.221   4.017  1.00 51.41           C  
ANISOU 1239  CD  GLU B  58     6606   6685   6241   -132  -1245    -77       C  
ATOM   1240  OE1 GLU B  58      12.195 -37.293   4.217  1.00 56.52           O  
ANISOU 1240  OE1 GLU B  58     7147   7427   6900   -247  -1246   -100       O  
ATOM   1241  OE2 GLU B  58      12.270 -35.097   4.159  1.00 51.79           O1-
ANISOU 1241  OE2 GLU B  58     6611   6788   6281     18  -1339    -75       O1-
ATOM   1242  N   ASN B  59      15.739 -37.431   6.681  1.00 28.05           N  
ANISOU 1242  N   ASN B  59     3637   3518   3504   -224   -840    -43       N  
ATOM   1243  CA  ASN B  59      16.485 -38.639   7.010  1.00 29.78           C  
ANISOU 1243  CA  ASN B  59     3885   3663   3766   -323   -742    -45       C  
ATOM   1244  C   ASN B  59      15.804 -39.897   6.497  1.00 31.55           C  
ANISOU 1244  C   ASN B  59     4116   3899   3972   -457   -797    -65       C  
ATOM   1245  O   ASN B  59      14.584 -40.024   6.550  1.00 33.96           O  
ANISOU 1245  O   ASN B  59     4308   4335   4262   -500   -887    -65       O  
ATOM   1246  CB  ASN B  59      16.691 -38.755   8.530  1.00 28.90           C  
ANISOU 1246  CB  ASN B  59     3638   3600   3741   -309   -669    -17       C  
ATOM   1247  CG  ASN B  59      17.559 -37.645   9.088  1.00 29.77           C  
ANISOU 1247  CG  ASN B  59     3758   3681   3874   -195   -599     -6       C  
ATOM   1248  ND2 ASN B  59      17.220 -37.166  10.284  1.00 26.75           N  
ANISOU 1248  ND2 ASN B  59     3222   3403   3540   -139   -590      5       N  
ATOM   1249  OD1 ASN B  59      18.517 -37.212   8.450  1.00 31.96           O  
ANISOU 1249  OD1 ASN B  59     4175   3855   4112   -169   -556    -12       O  
ATOM   1250  N   THR B  60      16.605 -40.827   5.993  1.00 36.63           N  
ANISOU 1250  N   THR B  60     4892   4414   4613   -522   -746    -94       N  
ATOM   1251  CA  THR B  60      16.111 -42.157   5.666  1.00 37.02           C  
ANISOU 1251  CA  THR B  60     4971   4433   4660   -658   -793   -119       C  
ATOM   1252  C   THR B  60      16.967 -43.139   6.452  1.00 34.68           C  
ANISOU 1252  C   THR B  60     4713   4023   4442   -692   -714   -112       C  
ATOM   1253  O   THR B  60      17.776 -42.722   7.275  1.00 34.35           O  
ANISOU 1253  O   THR B  60     4638   3966   4448   -610   -628    -85       O  
ATOM   1254  CB  THR B  60      16.280 -42.469   4.179  1.00 38.02           C  
ANISOU 1254  CB  THR B  60     5254   4490   4703   -692   -828   -183       C  
ATOM   1255  CG2 THR B  60      15.740 -41.319   3.331  1.00 41.15           C  
ANISOU 1255  CG2 THR B  60     5649   4976   5011   -631   -900   -178       C  
ATOM   1256  OG1 THR B  60      17.669 -42.662   3.887  1.00 37.73           O  
ANISOU 1256  OG1 THR B  60     5344   4329   4663   -645   -732   -226       O  
ATOM   1257  N   ASP B  61      16.808 -44.432   6.196  1.00 36.48           N  
ANISOU 1257  N   ASP B  61     5020   4162   4680   -808   -753   -138       N  
ATOM   1258  CA  ASP B  61      17.565 -45.444   6.931  1.00 44.04           C  
ANISOU 1258  CA  ASP B  61     6036   4985   5713   -832   -707   -128       C  
ATOM   1259  C   ASP B  61      19.065 -45.427   6.632  1.00 40.03           C  
ANISOU 1259  C   ASP B  61     5642   4358   5210   -709   -613   -187       C  
ATOM   1260  O   ASP B  61      19.854 -45.987   7.394  1.00 38.26           O  
ANISOU 1260  O   ASP B  61     5441   4045   5050   -675   -564   -176       O  
ATOM   1261  CB  ASP B  61      17.008 -46.849   6.671  1.00 53.03           C  
ANISOU 1261  CB  ASP B  61     7265   6026   6859   -991   -795   -145       C  
ATOM   1262  CG  ASP B  61      15.802 -47.174   7.538  1.00 59.37           C  
ANISOU 1262  CG  ASP B  61     7936   6946   7677  -1147   -862    -60       C  
ATOM   1263  OD1 ASP B  61      15.550 -46.438   8.519  1.00 57.82           O  
ANISOU 1263  OD1 ASP B  61     7572   6898   7500  -1113   -826      6       O  
ATOM   1264  OD2 ASP B  61      15.112 -48.174   7.237  1.00 65.34           O1-
ANISOU 1264  OD2 ASP B  61     8754   7656   8417  -1314   -951    -67       O1-
ATOM   1265  N   ASP B  62      19.457 -44.777   5.538  1.00 31.73           N  
ANISOU 1265  N   ASP B  62     4654   3323   4078   -645   -593   -249       N  
ATOM   1266  CA  ASP B  62      20.845 -44.829   5.083  1.00 35.85           C  
ANISOU 1266  CA  ASP B  62     5275   3774   4573   -552   -507   -326       C  
ATOM   1267  C   ASP B  62      21.423 -43.444   4.830  1.00 30.31           C  
ANISOU 1267  C   ASP B  62     4545   3165   3807   -470   -438   -314       C  
ATOM   1268  O   ASP B  62      22.639 -43.301   4.761  1.00 35.48           O  
ANISOU 1268  O   ASP B  62     5236   3807   4437   -399   -347   -359       O  
ATOM   1269  CB  ASP B  62      20.968 -45.729   3.842  1.00 51.67           C  
ANISOU 1269  CB  ASP B  62     7423   5693   6517   -587   -550   -441       C  
ATOM   1270  CG  ASP B  62      20.401 -47.111   4.062  1.00 62.30           C  
ANISOU 1270  CG  ASP B  62     8829   6915   7925   -683   -635   -454       C  
ATOM   1271  OD1 ASP B  62      19.285 -47.380   3.571  1.00 64.61           O  
ANISOU 1271  OD1 ASP B  62     9129   7231   8187   -802   -730   -450       O  
ATOM   1272  OD2 ASP B  62      21.073 -47.928   4.725  1.00 68.77           O1-
ANISOU 1272  OD2 ASP B  62     9696   7614   8819   -644   -615   -466       O1-
ATOM   1273  N   LEU B  63      20.563 -42.444   4.651  1.00 26.63           N  
ANISOU 1273  N   LEU B  63     4022   2792   3303   -483   -490   -259       N  
ATOM   1274  CA  LEU B  63      20.968 -41.127   4.161  1.00 27.70           C  
ANISOU 1274  CA  LEU B  63     4180   2986   3360   -430   -462   -244       C  
ATOM   1275  C   LEU B  63      20.401 -40.028   5.039  1.00 25.90           C  
ANISOU 1275  C   LEU B  63     3840   2827   3174   -383   -483   -161       C  
ATOM   1276  O   LEU B  63      19.289 -40.155   5.546  1.00 30.88           O  
ANISOU 1276  O   LEU B  63     4371   3510   3851   -405   -555   -128       O  
ATOM   1277  CB  LEU B  63      20.441 -40.904   2.725  1.00 27.14           C  
ANISOU 1277  CB  LEU B  63     4198   2942   3173   -477   -542   -274       C  
ATOM   1278  CG  LEU B  63      20.975 -41.762   1.577  1.00 34.08           C  
ANISOU 1278  CG  LEU B  63     5196   3781   3971   -520   -529   -378       C  
ATOM   1279  CD1 LEU B  63      20.097 -41.623   0.313  1.00 35.56           C  
ANISOU 1279  CD1 LEU B  63     5443   4015   4052   -586   -634   -393       C  
ATOM   1280  CD2 LEU B  63      22.414 -41.385   1.273  1.00 37.37           C  
ANISOU 1280  CD2 LEU B  63     5669   4213   4316   -478   -418   -422       C  
ATOM   1281  N   THR B  64      21.163 -38.951   5.210  1.00 22.46           N  
ANISOU 1281  N   THR B  64     3419   2402   2711   -324   -424   -137       N  
ATOM   1282  CA  THR B  64      20.666 -37.736   5.846  1.00 23.25           C  
ANISOU 1282  CA  THR B  64     3448   2552   2836   -262   -460    -77       C  
ATOM   1283  C   THR B  64      21.002 -36.528   4.986  1.00 28.42           C  
ANISOU 1283  C   THR B  64     4219   3191   3389   -246   -485    -58       C  
ATOM   1284  O   THR B  64      22.066 -36.467   4.369  1.00 32.25           O  
ANISOU 1284  O   THR B  64     4804   3653   3796   -283   -414    -80       O  
ATOM   1285  CB  THR B  64      21.242 -37.511   7.281  1.00 25.50           C  
ANISOU 1285  CB  THR B  64     3631   2851   3208   -210   -372    -52       C  
ATOM   1286  CG2 THR B  64      22.760 -37.395   7.255  1.00 25.74           C  
ANISOU 1286  CG2 THR B  64     3728   2846   3206   -206   -252    -73       C  
ATOM   1287  OG1 THR B  64      20.699 -36.298   7.826  1.00 24.40           O  
ANISOU 1287  OG1 THR B  64     3429   2755   3085   -139   -421    -16       O  
ATOM   1288  N   THR B  65      20.081 -35.575   4.939  1.00 24.97           N  
ANISOU 1288  N   THR B  65     3768   2777   2942   -194   -594    -19       N  
ATOM   1289  CA  THR B  65      20.282 -34.351   4.176  1.00 25.95           C  
ANISOU 1289  CA  THR B  65     4027   2862   2972   -179   -649     19       C  
ATOM   1290  C   THR B  65      19.930 -33.123   5.010  1.00 28.54           C  
ANISOU 1290  C   THR B  65     4316   3178   3350    -74   -704     56       C  
ATOM   1291  O   THR B  65      18.818 -33.020   5.546  1.00 29.27           O  
ANISOU 1291  O   THR B  65     4290   3329   3504      8   -789     48       O  
ATOM   1292  CB  THR B  65      19.429 -34.339   2.899  1.00 26.33           C  
ANISOU 1292  CB  THR B  65     4153   2923   2928   -206   -776     24       C  
ATOM   1293  CG2 THR B  65      19.759 -33.111   2.043  1.00 28.20           C  
ANISOU 1293  CG2 THR B  65     4562   3104   3049   -214   -839     81       C  
ATOM   1294  OG1 THR B  65      19.684 -35.530   2.139  1.00 30.04           O  
ANISOU 1294  OG1 THR B  65     4655   3406   3352   -301   -732    -30       O  
ATOM   1295  N   LEU B  66      20.887 -32.206   5.124  1.00 27.56           N  
ANISOU 1295  N   LEU B  66     4289   2990   3192    -79   -657     86       N  
ATOM   1296  CA  LEU B  66      20.671 -30.916   5.774  1.00 28.46           C  
ANISOU 1296  CA  LEU B  66     4416   3057   3339     18   -724    114       C  
ATOM   1297  C   LEU B  66      20.536 -29.862   4.696  1.00 30.70           C  
ANISOU 1297  C   LEU B  66     4898   3251   3515     11   -851    169       C  
ATOM   1298  O   LEU B  66      21.404 -29.748   3.836  1.00 30.64           O  
ANISOU 1298  O   LEU B  66     5037   3209   3396   -108   -809    203       O  
ATOM   1299  CB  LEU B  66      21.862 -30.539   6.650  1.00 23.80           C  
ANISOU 1299  CB  LEU B  66     3824   2443   2778     -4   -597    116       C  
ATOM   1300  CG  LEU B  66      21.872 -29.114   7.234  1.00 31.63           C  
ANISOU 1300  CG  LEU B  66     4875   3356   3788     74   -662    138       C  
ATOM   1301  CD1 LEU B  66      20.692 -28.868   8.188  1.00 28.61           C  
ANISOU 1301  CD1 LEU B  66     4339   3021   3510    234   -750     97       C  
ATOM   1302  CD2 LEU B  66      23.174 -28.825   7.977  1.00 31.73           C  
ANISOU 1302  CD2 LEU B  66     4893   3358   3806     14   -526    138       C  
ATOM   1303  N   ILE B  67      19.467 -29.078   4.759  1.00 26.83           N  
ANISOU 1303  N   ILE B  67     4410   2736   3049    141  -1010    178       N  
ATOM   1304  CA  ILE B  67      19.266 -27.990   3.815  1.00 28.00           C  
ANISOU 1304  CA  ILE B  67     4765   2774   3100    156  -1162    243       C  
ATOM   1305  C   ILE B  67      19.135 -26.664   4.539  1.00 33.05           C  
ANISOU 1305  C   ILE B  67     5463   3305   3788    285  -1257    253       C  
ATOM   1306  O   ILE B  67      18.375 -26.553   5.495  1.00 31.89           O  
ANISOU 1306  O   ILE B  67     5158   3212   3745    439  -1297    190       O  
ATOM   1307  CB  ILE B  67      17.976 -28.187   3.020  1.00 29.71           C  
ANISOU 1307  CB  ILE B  67     4962   3043   3284    224  -1319    239       C  
ATOM   1308  CG1 ILE B  67      18.024 -29.494   2.226  1.00 31.17           C  
ANISOU 1308  CG1 ILE B  67     5106   3324   3414     93  -1244    219       C  
ATOM   1309  CG2 ILE B  67      17.730 -26.999   2.108  1.00 33.61           C  
ANISOU 1309  CG2 ILE B  67     5681   3411   3680    260  -1500    316       C  
ATOM   1310  CD1 ILE B  67      16.659 -29.914   1.705  1.00 32.66           C  
ANISOU 1310  CD1 ILE B  67     5210   3607   3592    153  -1377    194       C  
ATOM   1311  N   ILE B  68      19.860 -25.656   4.069  1.00 34.80           N  
ANISOU 1311  N   ILE B  68     5917   3380   3926    215  -1300    327       N  
ATOM   1312  CA  ILE B  68      19.691 -24.301   4.573  1.00 33.91           C  
ANISOU 1312  CA  ILE B  68     5919   3118   3847    337  -1430    340       C  
ATOM   1313  C   ILE B  68      19.387 -23.391   3.402  1.00 35.27           C  
ANISOU 1313  C   ILE B  68     6353   3143   3905    332  -1627    433       C  
ATOM   1314  O   ILE B  68      20.248 -23.134   2.577  1.00 38.33           O  
ANISOU 1314  O   ILE B  68     6938   3460   4164    144  -1604    523       O  
ATOM   1315  CB  ILE B  68      20.955 -23.786   5.293  1.00 32.25           C  
ANISOU 1315  CB  ILE B  68     5776   2835   3644    237  -1309    352       C  
ATOM   1316  CG1 ILE B  68      21.308 -24.700   6.466  1.00 30.21           C  
ANISOU 1316  CG1 ILE B  68     5263   2726   3490    242  -1118    269       C  
ATOM   1317  CG2 ILE B  68      20.755 -22.349   5.751  1.00 33.94           C  
ANISOU 1317  CG2 ILE B  68     6142   2865   3889    358  -1464    360       C  
ATOM   1318  CD1 ILE B  68      22.555 -24.270   7.214  1.00 33.83           C  
ANISOU 1318  CD1 ILE B  68     5756   3145   3951    146   -992    272       C  
ATOM   1319  N   MET B  69      18.151 -22.917   3.334  1.00 36.80           N  
ANISOU 1319  N   MET B  69     6539   3307   4135    538  -1825    410       N  
ATOM   1320  CA  MET B  69      17.721 -22.021   2.269  1.00 40.31           C  
ANISOU 1320  CA  MET B  69     7235   3601   4479    572  -2048    501       C  
ATOM   1321  C   MET B  69      18.266 -20.609   2.457  1.00 43.68           C  
ANISOU 1321  C   MET B  69     7931   3779   4888    576  -2158    565       C  
ATOM   1322  O   MET B  69      18.441 -20.145   3.595  1.00 44.48           O  
ANISOU 1322  O   MET B  69     7979   3828   5093    673  -2130    496       O  
ATOM   1323  CB  MET B  69      16.194 -21.980   2.218  1.00 44.07           C  
ANISOU 1323  CB  MET B  69     7594   4146   5005    822  -2234    438       C  
ATOM   1324  CG  MET B  69      15.546 -23.287   1.756  1.00 46.97           C  
ANISOU 1324  CG  MET B  69     7749   4742   5356    785  -2172    397       C  
ATOM   1325  SD  MET B  69      13.846 -23.421   2.336  1.00 68.24           S  
ANISOU 1325  SD  MET B  69    10172   7609   8145   1075  -2313    269       S  
ATOM   1326  CE  MET B  69      13.152 -21.890   1.715  1.00248.74           C  
ANISOU 1326  CE  MET B  69    33286  30268  30955   1294  -2636    319       C  
ATOM   1327  N   ASP B  70      18.537 -19.931   1.343  1.00 42.87           N  
ANISOU 1327  N   ASP B  70     8123   3522   4642    458  -2287    698       N  
ATOM   1328  CA  ASP B  70      18.889 -18.515   1.381  1.00 49.71           C  
ANISOU 1328  CA  ASP B  70     9294   4115   5477    460  -2446    777       C  
ATOM   1329  C   ASP B  70      20.030 -18.262   2.377  1.00 48.29           C  
ANISOU 1329  C   ASP B  70     9113   3892   5345    341  -2280    750       C  
ATOM   1330  O   ASP B  70      19.915 -17.438   3.281  1.00 48.97           O  
ANISOU 1330  O   ASP B  70     9242   3837   5527    489  -2361    695       O  
ATOM   1331  CB  ASP B  70      17.646 -17.703   1.757  1.00 58.90           C  
ANISOU 1331  CB  ASP B  70    10480   5159   6739    796  -2701    713       C  
ATOM   1332  CG  ASP B  70      17.893 -16.209   1.749  1.00 72.68           C  
ANISOU 1332  CG  ASP B  70    12578   6578   8459    828  -2910    790       C  
ATOM   1333  OD1 ASP B  70      17.268 -15.501   2.573  1.00 78.50           O  
ANISOU 1333  OD1 ASP B  70    13304   7206   9316   1101  -3052    689       O  
ATOM   1334  OD2 ASP B  70      18.705 -15.740   0.921  1.00 76.59           O1-
ANISOU 1334  OD2 ASP B  70    13363   6928   8808    578  -2940    947       O1-
ATOM   1335  N   VAL B  71      21.134 -18.977   2.196  1.00 44.43           N  
ANISOU 1335  N   VAL B  71     8567   3535   4779     81  -2053    779       N  
ATOM   1336  CA  VAL B  71      22.222 -18.966   3.170  1.00 43.64           C  
ANISOU 1336  CA  VAL B  71     8402   3460   4721    -32  -1865    738       C  
ATOM   1337  C   VAL B  71      22.764 -17.550   3.395  1.00 47.96           C  
ANISOU 1337  C   VAL B  71     9241   3748   5232    -97  -1986    807       C  
ATOM   1338  O   VAL B  71      22.820 -16.737   2.472  1.00 47.46           O  
ANISOU 1338  O   VAL B  71     9482   3506   5043   -200  -2154    937       O  
ATOM   1339  CB  VAL B  71      23.356 -19.947   2.757  1.00 47.52           C  
ANISOU 1339  CB  VAL B  71     8801   4148   5107   -299  -1621    758       C  
ATOM   1340  CG1 VAL B  71      24.213 -19.346   1.644  1.00 48.37           C  
ANISOU 1340  CG1 VAL B  71     9194   4177   5005   -578  -1657    903       C  
ATOM   1341  CG2 VAL B  71      24.206 -20.317   3.948  1.00 49.66           C  
ANISOU 1341  CG2 VAL B  71     8885   4521   5461   -336  -1410    672       C  
ATOM   1342  N   GLN B  72      23.147 -17.256   4.633  1.00 50.14           N  
ANISOU 1342  N   GLN B  72     9610   3836   5606   -506  -1183    244       N  
ATOM   1343  CA  GLN B  72      23.608 -15.922   5.002  1.00 52.50           C  
ANISOU 1343  CA  GLN B  72    10184   3955   5807   -651  -1148    262       C  
ATOM   1344  C   GLN B  72      24.999 -15.995   5.615  1.00 46.93           C  
ANISOU 1344  C   GLN B  72     9322   3389   5119   -958   -950    274       C  
ATOM   1345  O   GLN B  72      25.452 -17.065   6.021  1.00 43.76           O  
ANISOU 1345  O   GLN B  72     8564   3228   4833  -1006   -871    256       O  
ATOM   1346  CB  GLN B  72      22.646 -15.296   6.008  1.00 60.19           C  
ANISOU 1346  CB  GLN B  72    11158   4851   6859   -470  -1285    190       C  
ATOM   1347  CG  GLN B  72      21.201 -15.254   5.541  1.00 66.98           C  
ANISOU 1347  CG  GLN B  72    12116   5617   7718   -139  -1494    144       C  
ATOM   1348  CD  GLN B  72      20.228 -14.998   6.679  1.00 70.07           C  
ANISOU 1348  CD  GLN B  72    12367   6025   8231     49  -1615     41       C  
ATOM   1349  NE2 GLN B  72      18.935 -15.065   6.379  1.00 72.87           N  
ANISOU 1349  NE2 GLN B  72    12735   6350   8601    345  -1797    -31       N  
ATOM   1350  OE1 GLN B  72      20.633 -14.751   7.816  1.00 68.72           O  
ANISOU 1350  OE1 GLN B  72    12068   5907   8137    -72  -1544     15       O  
ATOM   1351  N   LYS B  73      25.673 -14.854   5.690  1.00 46.46           N  
ANISOU 1351  N   LYS B  73     9536   3179   4937  -1164   -873    296       N  
ATOM   1352  CA  LYS B  73      27.013 -14.805   6.256  1.00 47.92           C  
ANISOU 1352  CA  LYS B  73     9582   3505   5121  -1471   -685    287       C  
ATOM   1353  C   LYS B  73      27.012 -15.467   7.623  1.00 42.12           C  
ANISOU 1353  C   LYS B  73     8431   2996   4577  -1428   -682    225       C  
ATOM   1354  O   LYS B  73      27.930 -16.210   7.960  1.00 40.87           O  
ANISOU 1354  O   LYS B  73     7984   3070   4476  -1570   -560    211       O  
ATOM   1355  CB  LYS B  73      27.504 -13.361   6.377  1.00 54.83           C  
ANISOU 1355  CB  LYS B  73    10817   4168   5849  -1679   -623    296       C  
ATOM   1356  CG  LYS B  73      27.582 -12.612   5.055  1.00 62.78           C  
ANISOU 1356  CG  LYS B  73    12294   4923   6638  -1751   -612    363       C  
ATOM   1357  CD  LYS B  73      28.667 -13.180   4.153  1.00 70.44           C  
ANISOU 1357  CD  LYS B  73    13214   6026   7522  -1985   -442    393       C  
ATOM   1358  CE  LYS B  73      30.050 -13.005   4.766  1.00 75.43           C  
ANISOU 1358  CE  LYS B  73    13695   6823   8141  -2335   -236    348       C  
ATOM   1359  NZ  LYS B  73      31.143 -13.364   3.815  1.00 76.82           N1+
ANISOU 1359  NZ  LYS B  73    13874   7112   8203  -2587    -61    360       N1+
ATOM   1360  N   GLN B  74      25.952 -15.219   8.389  1.00 41.72           N  
ANISOU 1360  N   GLN B  74     8354   2879   4617  -1219   -824    182       N  
ATOM   1361  CA  GLN B  74      25.865 -15.690   9.769  1.00 46.47           C  
ANISOU 1361  CA  GLN B  74     8611   3661   5383  -1183   -826    120       C  
ATOM   1362  C   GLN B  74      25.704 -17.207   9.886  1.00 41.16           C  
ANISOU 1362  C   GLN B  74     7569   3226   4844  -1070   -828    107       C  
ATOM   1363  O   GLN B  74      25.791 -17.749  10.984  1.00 42.33           O  
ANISOU 1363  O   GLN B  74     7427   3542   5113  -1064   -809     65       O  
ATOM   1364  CB  GLN B  74      24.711 -14.999  10.498  1.00 55.62           C  
ANISOU 1364  CB  GLN B  74     9856   4682   6594   -988   -975     66       C  
ATOM   1365  CG  GLN B  74      23.336 -15.530  10.115  1.00 66.36           C  
ANISOU 1365  CG  GLN B  74    11177   6021   8016   -679  -1140     36       C  
ATOM   1366  CD  GLN B  74      22.210 -14.853  10.876  1.00 76.91           C  
ANISOU 1366  CD  GLN B  74    12567   7250   9404   -482  -1284    -42       C  
ATOM   1367  NE2 GLN B  74      21.572 -15.597  11.774  1.00 78.23           N  
ANISOU 1367  NE2 GLN B  74    12416   7583   9725   -360  -1328   -116       N  
ATOM   1368  OE1 GLN B  74      21.921 -13.673  10.662  1.00 83.08           O  
ANISOU 1368  OE1 GLN B  74    13683   7799  10083   -443  -1352    -42       O  
ATOM   1369  N   ASP B  75      25.457 -17.882   8.764  1.00 37.24           N  
ANISOU 1369  N   ASP B  75     7101   2733   4315   -980   -850    143       N  
ATOM   1370  CA  ASP B  75      25.313 -19.338   8.747  1.00 32.88           C  
ANISOU 1370  CA  ASP B  75     6237   2383   3872   -880   -843    132       C  
ATOM   1371  C   ASP B  75      26.665 -20.027   8.613  1.00 33.28           C  
ANISOU 1371  C   ASP B  75     6115   2621   3910  -1076   -681    158       C  
ATOM   1372  O   ASP B  75      26.767 -21.240   8.776  1.00 34.57           O  
ANISOU 1372  O   ASP B  75     6010   2964   4162  -1017   -655    148       O  
ATOM   1373  CB  ASP B  75      24.415 -19.797   7.579  1.00 33.12           C  
ANISOU 1373  CB  ASP B  75     6369   2344   3872   -692   -941    147       C  
ATOM   1374  CG  ASP B  75      22.979 -19.330   7.720  1.00 37.33           C  
ANISOU 1374  CG  ASP B  75     7008   2745   4433   -453  -1118     94       C  
ATOM   1375  OD1 ASP B  75      22.420 -19.424   8.832  1.00 39.59           O  
ANISOU 1375  OD1 ASP B  75     7115   3093   4833   -369  -1167     27       O  
ATOM   1376  OD2 ASP B  75      22.404 -18.864   6.714  1.00 37.76           O1-
ANISOU 1376  OD2 ASP B  75     7324   2638   4385   -344  -1210    112       O1-
ATOM   1377  N   GLY B  76      27.700 -19.267   8.281  1.00 35.02           N  
ANISOU 1377  N   GLY B  76     6495   2801   4011  -1307   -571    182       N  
ATOM   1378  CA  GLY B  76      29.018 -19.853   8.119  1.00 36.16           C  
ANISOU 1378  CA  GLY B  76     6465   3142   4133  -1496   -416    184       C  
ATOM   1379  C   GLY B  76      29.518 -20.502   9.399  1.00 36.06           C  
ANISOU 1379  C   GLY B  76     6103   3357   4240  -1514   -374    137       C  
ATOM   1380  O   GLY B  76      29.080 -20.156  10.496  1.00 35.98           O  
ANISOU 1380  O   GLY B  76     6037   3330   4304  -1462   -434    104       O  
ATOM   1381  N   GLY B  77      30.439 -21.447   9.265  1.00 35.23           N  
ANISOU 1381  N   GLY B  77     5771   3465   4149  -1577   -276    128       N  
ATOM   1382  CA  GLY B  77      31.044 -22.059  10.429  1.00 37.25           C  
ANISOU 1382  CA  GLY B  77     5714   3942   4495  -1591   -237     82       C  
ATOM   1383  C   GLY B  77      30.917 -23.567  10.461  1.00 35.22           C  
ANISOU 1383  C   GLY B  77     5211   3841   4330  -1422   -252     84       C  
ATOM   1384  O   GLY B  77      30.598 -24.205   9.447  1.00 34.01           O  
ANISOU 1384  O   GLY B  77     5104   3656   4162  -1334   -263    115       O  
ATOM   1385  N   LEU B  78      31.166 -24.131  11.639  1.00 32.92           N  
ANISOU 1385  N   LEU B  78     4675   3708   4125  -1377   -254     50       N  
ATOM   1386  CA  LEU B  78      31.194 -25.576  11.821  1.00 32.74           C  
ANISOU 1386  CA  LEU B  78     4429   3835   4177  -1230   -258     49       C  
ATOM   1387  C   LEU B  78      29.798 -26.154  12.023  1.00 32.73           C  
ANISOU 1387  C   LEU B  78     4439   3732   4264  -1022   -367     62       C  
ATOM   1388  O   LEU B  78      29.017 -25.636  12.814  1.00 31.24           O  
ANISOU 1388  O   LEU B  78     4288   3458   4123   -977   -441     45       O  
ATOM   1389  CB  LEU B  78      32.101 -25.943  13.000  1.00 32.48           C  
ANISOU 1389  CB  LEU B  78     4149   4014   4177  -1265   -217      4       C  
ATOM   1390  CG  LEU B  78      33.560 -25.495  12.856  1.00 37.78           C  
ANISOU 1390  CG  LEU B  78     4752   4843   4761  -1473   -102    -39       C  
ATOM   1391  CD1 LEU B  78      34.363 -25.764  14.130  1.00 40.22           C  
ANISOU 1391  CD1 LEU B  78     4814   5366   5100  -1488    -85    -96       C  
ATOM   1392  CD2 LEU B  78      34.204 -26.181  11.667  1.00 42.14           C  
ANISOU 1392  CD2 LEU B  78     5274   5481   5258  -1488    -25    -36       C  
ATOM   1393  N   TYR B  79      29.486 -27.207  11.268  1.00 27.59           N  
ANISOU 1393  N   TYR B  79     3759   3095   3628   -905   -371     82       N  
ATOM   1394  CA  TYR B  79      28.253 -27.966  11.431  1.00 25.30           C  
ANISOU 1394  CA  TYR B  79     3448   2748   3417   -725   -454     78       C  
ATOM   1395  C   TYR B  79      28.661 -29.396  11.710  1.00 29.78           C  
ANISOU 1395  C   TYR B  79     3824   3467   4026   -645   -411     76       C  
ATOM   1396  O   TYR B  79      29.558 -29.926  11.060  1.00 32.13           O  
ANISOU 1396  O   TYR B  79     4070   3860   4279   -676   -338     88       O  
ATOM   1397  CB  TYR B  79      27.373 -27.895  10.176  1.00 27.93           C  
ANISOU 1397  CB  TYR B  79     3958   2938   3716   -655   -505     96       C  
ATOM   1398  CG  TYR B  79      26.672 -26.568  10.032  1.00 27.93           C  
ANISOU 1398  CG  TYR B  79     4169   2763   3682   -671   -583     92       C  
ATOM   1399  CD1 TYR B  79      25.347 -26.411  10.433  1.00 23.81           C  
ANISOU 1399  CD1 TYR B  79     3678   2150   3219   -537   -694     53       C  
ATOM   1400  CD2 TYR B  79      27.346 -25.461   9.537  1.00 28.26           C  
ANISOU 1400  CD2 TYR B  79     4382   2732   3624   -821   -542    117       C  
ATOM   1401  CE1 TYR B  79      24.712 -25.182  10.335  1.00 24.59           C  
ANISOU 1401  CE1 TYR B  79     3973   2089   3282   -523   -776     40       C  
ATOM   1402  CE2 TYR B  79      26.719 -24.233   9.418  1.00 29.74           C  
ANISOU 1402  CE2 TYR B  79     4797   2737   3766   -823   -617    116       C  
ATOM   1403  CZ  TYR B  79      25.407 -24.099   9.818  1.00 30.08           C  
ANISOU 1403  CZ  TYR B  79     4866   2691   3873   -659   -740     78       C  
ATOM   1404  OH  TYR B  79      24.796 -22.874   9.714  1.00 31.37           O  
ANISOU 1404  OH  TYR B  79     5260   2673   3987   -635   -824     69       O  
ATOM   1405  N   THR B  80      28.017 -30.015  12.691  1.00 28.77           N  
ANISOU 1405  N   THR B  80     3603   3357   3973   -542   -454     54       N  
ATOM   1406  CA  THR B  80      28.401 -31.352  13.120  1.00 24.07           C  
ANISOU 1406  CA  THR B  80     2857   2884   3405   -459   -418     55       C  
ATOM   1407  C   THR B  80      27.272 -32.339  12.896  1.00 24.30           C  
ANISOU 1407  C   THR B  80     2910   2846   3478   -330   -453     46       C  
ATOM   1408  O   THR B  80      26.121 -32.070  13.245  1.00 23.84           O  
ANISOU 1408  O   THR B  80     2899   2697   3462   -292   -517     16       O  
ATOM   1409  CB  THR B  80      28.800 -31.344  14.613  1.00 26.68           C  
ANISOU 1409  CB  THR B  80     3062   3310   3766   -469   -421     35       C  
ATOM   1410  CG2 THR B  80      29.052 -32.751  15.130  1.00 29.30           C  
ANISOU 1410  CG2 THR B  80     3279   3738   4114   -356   -400     37       C  
ATOM   1411  OG1 THR B  80      29.985 -30.561  14.781  1.00 29.50           O  
ANISOU 1411  OG1 THR B  80     3370   3765   4074   -598   -376     28       O  
ATOM   1412  N   LEU B  81      27.605 -33.484  12.313  1.00 21.83           N  
ANISOU 1412  N   LEU B  81     2559   2585   3150   -267   -405     62       N  
ATOM   1413  CA  LEU B  81      26.666 -34.586  12.177  1.00 21.02           C  
ANISOU 1413  CA  LEU B  81     2472   2436   3081   -161   -418     47       C  
ATOM   1414  C   LEU B  81      27.053 -35.639  13.198  1.00 25.18           C  
ANISOU 1414  C   LEU B  81     2900   3045   3623    -97   -387     47       C  
ATOM   1415  O   LEU B  81      28.223 -36.007  13.274  1.00 23.53           O  
ANISOU 1415  O   LEU B  81     2615   2946   3381    -88   -341     66       O  
ATOM   1416  CB  LEU B  81      26.761 -35.184  10.762  1.00 23.34           C  
ANISOU 1416  CB  LEU B  81     2820   2713   3334   -132   -383     63       C  
ATOM   1417  CG  LEU B  81      26.061 -36.518  10.478  1.00 24.42           C  
ANISOU 1417  CG  LEU B  81     2968   2822   3489    -35   -370     46       C  
ATOM   1418  CD1 LEU B  81      24.589 -36.478  10.885  1.00 21.48           C  
ANISOU 1418  CD1 LEU B  81     2633   2365   3164     -8   -431     -7       C  
ATOM   1419  CD2 LEU B  81      26.194 -36.912   8.986  1.00 28.27           C  
ANISOU 1419  CD2 LEU B  81     3519   3293   3930    -24   -337     60       C  
ATOM   1420  N   SER B  82      26.087 -36.113  13.989  1.00 22.78           N  
ANISOU 1420  N   SER B  82     2603   2692   3359    -51   -413     17       N  
ATOM   1421  CA  SER B  82      26.342 -37.198  14.929  1.00 22.58           C  
ANISOU 1421  CA  SER B  82     2532   2716   3332     14   -384     21       C  
ATOM   1422  C   SER B  82      25.379 -38.353  14.718  1.00 20.95           C  
ANISOU 1422  C   SER B  82     2391   2436   3133     74   -365     -3       C  
ATOM   1423  O   SER B  82      24.200 -38.137  14.455  1.00 24.08           O  
ANISOU 1423  O   SER B  82     2833   2756   3559     51   -393    -51       O  
ATOM   1424  CB  SER B  82      26.212 -36.724  16.399  1.00 22.82           C  
ANISOU 1424  CB  SER B  82     2517   2767   3385    -16   -415      4       C  
ATOM   1425  OG  SER B  82      26.984 -35.565  16.639  1.00 27.21           O  
ANISOU 1425  OG  SER B  82     3020   3384   3935    -91   -432     13       O  
ATOM   1426  N   LEU B  83      25.886 -39.571  14.886  1.00 19.75           N  
ANISOU 1426  N   LEU B  83     2246   2310   2947    151   -317     19       N  
ATOM   1427  CA  LEU B  83      25.081 -40.781  14.788  1.00 21.51           C  
ANISOU 1427  CA  LEU B  83     2553   2457   3162    194   -281     -5       C  
ATOM   1428  C   LEU B  83      25.262 -41.569  16.082  1.00 23.66           C  
ANISOU 1428  C   LEU B  83     2848   2733   3407    239   -262      5       C  
ATOM   1429  O   LEU B  83      26.372 -41.679  16.578  1.00 25.87           O  
ANISOU 1429  O   LEU B  83     3081   3092   3655    298   -264     45       O  
ATOM   1430  CB  LEU B  83      25.562 -41.654  13.627  1.00 20.97           C  
ANISOU 1430  CB  LEU B  83     2522   2389   3058    257   -233     17       C  
ATOM   1431  CG  LEU B  83      25.615 -41.027  12.222  1.00 23.68           C  
ANISOU 1431  CG  LEU B  83     2861   2734   3403    221   -242     19       C  
ATOM   1432  CD1 LEU B  83      26.081 -42.085  11.224  1.00 22.11           C  
ANISOU 1432  CD1 LEU B  83     2701   2537   3163    289   -184     34       C  
ATOM   1433  CD2 LEU B  83      24.251 -40.502  11.837  1.00 19.36           C  
ANISOU 1433  CD2 LEU B  83     2356   2109   2890    165   -284    -34       C  
ATOM   1434  N   GLY B  84      24.178 -42.129  16.603  1.00 24.35           N  
ANISOU 1434  N   GLY B  84     3011   2741   3498    211   -242    -40       N  
ATOM   1435  CA  GLY B  84      24.247 -42.986  17.776  1.00 23.04           C  
ANISOU 1435  CA  GLY B  84     2915   2552   3287    246   -214    -29       C  
ATOM   1436  C   GLY B  84      23.368 -44.206  17.607  1.00 22.70           C  
ANISOU 1436  C   GLY B  84     3009   2405   3211    237   -147    -66       C  
ATOM   1437  O   GLY B  84      22.235 -44.111  17.141  1.00 21.51           O  
ANISOU 1437  O   GLY B  84     2870   2212   3093    156   -135   -137       O  
ATOM   1438  N   ASN B  85      23.892 -45.370  17.965  1.00 20.27           N  
ANISOU 1438  N   ASN B  85     2814   2058   2830    322   -104    -27       N  
ATOM   1439  CA  ASN B  85      23.017 -46.507  18.198  1.00 22.83           C  
ANISOU 1439  CA  ASN B  85     3304   2266   3105    284    -30    -66       C  
ATOM   1440  C   ASN B  85      23.499 -47.327  19.404  1.00 27.39           C  
ANISOU 1440  C   ASN B  85     4016   2796   3594    352    -10    -21       C  
ATOM   1441  O   ASN B  85      24.442 -46.936  20.089  1.00 26.66           O  
ANISOU 1441  O   ASN B  85     3862   2780   3487    432    -65     32       O  
ATOM   1442  CB  ASN B  85      22.821 -47.365  16.938  1.00 22.38           C  
ANISOU 1442  CB  ASN B  85     3323   2149   3031    306     25    -80       C  
ATOM   1443  CG  ASN B  85      24.052 -48.160  16.559  1.00 26.68           C  
ANISOU 1443  CG  ASN B  85     3924   2696   3518    465     36     -7       C  
ATOM   1444  ND2 ASN B  85      23.991 -48.818  15.398  1.00 25.37           N  
ANISOU 1444  ND2 ASN B  85     3812   2488   3341    490     80    -19       N  
ATOM   1445  OD1 ASN B  85      25.041 -48.202  17.294  1.00 26.60           O  
ANISOU 1445  OD1 ASN B  85     3906   2731   3470    570      2     49       O  
ATOM   1446  N   GLU B  86      22.857 -48.461  19.641  1.00 24.64           N  
ANISOU 1446  N   GLU B  86     3862   2324   3177    318     70    -46       N  
ATOM   1447  CA  GLU B  86      23.144 -49.292  20.812  1.00 31.18           C  
ANISOU 1447  CA  GLU B  86     4871   3075   3899    371     94     -6       C  
ATOM   1448  C   GLU B  86      24.592 -49.786  20.853  1.00 33.72           C  
ANISOU 1448  C   GLU B  86     5229   3425   4158    586     51     84       C  
ATOM   1449  O   GLU B  86      25.069 -50.246  21.899  1.00 31.01           O  
ANISOU 1449  O   GLU B  86     5007   3049   3725    671     35    128       O  
ATOM   1450  CB  GLU B  86      22.174 -50.483  20.862  1.00 31.93           C  
ANISOU 1450  CB  GLU B  86     5202   3012   3918    277    206    -56       C  
ATOM   1451  CG  GLU B  86      20.705 -50.105  21.124  1.00 32.43           C  
ANISOU 1451  CG  GLU B  86     5236   3065   4020     57    257   -171       C  
ATOM   1452  CD  GLU B  86      20.043 -49.336  19.969  1.00 35.42           C  
ANISOU 1452  CD  GLU B  86     5423   3524   4510    -16    235   -247       C  
ATOM   1453  OE1 GLU B  86      20.596 -49.312  18.849  1.00 27.79           O  
ANISOU 1453  OE1 GLU B  86     4395   2587   3576     76    207   -211       O  
ATOM   1454  OE2 GLU B  86      18.970 -48.737  20.192  1.00 39.80           O1-
ANISOU 1454  OE2 GLU B  86     5892   4117   5113   -161    242   -349       O1-
ATOM   1455  N   PHE B  87      25.295 -49.687  19.724  1.00 30.54           N  
ANISOU 1455  N   PHE B  87     4720   3090   3792    678     28    103       N  
ATOM   1456  CA  PHE B  87      26.650 -50.238  19.626  1.00 32.65           C  
ANISOU 1456  CA  PHE B  87     5006   3402   3999    891     -8    163       C  
ATOM   1457  C   PHE B  87      27.760 -49.199  19.514  1.00 35.24           C  
ANISOU 1457  C   PHE B  87     5089   3922   4378    960    -92    182       C  
ATOM   1458  O   PHE B  87      28.940 -49.547  19.478  1.00 36.18           O  
ANISOU 1458  O   PHE B  87     5179   4120   4448   1138   -129    211       O  
ATOM   1459  CB  PHE B  87      26.744 -51.270  18.494  1.00 33.25           C  
ANISOU 1459  CB  PHE B  87     5194   3397   4042    968     51    162       C  
ATOM   1460  CG  PHE B  87      25.869 -52.461  18.715  1.00 36.48           C  
ANISOU 1460  CG  PHE B  87     5881   3610   4370    918    141    145       C  
ATOM   1461  CD1 PHE B  87      26.308 -53.522  19.497  1.00 33.33           C  
ANISOU 1461  CD1 PHE B  87     5718   3103   3844   1056    150    189       C  
ATOM   1462  CD2 PHE B  87      24.590 -52.506  18.181  1.00 35.79           C  
ANISOU 1462  CD2 PHE B  87     5829   3449   4322    728    215     76       C  
ATOM   1463  CE1 PHE B  87      25.493 -54.616  19.731  1.00 35.92           C  
ANISOU 1463  CE1 PHE B  87     6336   3231   4081    986    246    172       C  
ATOM   1464  CE2 PHE B  87      23.767 -53.597  18.412  1.00 36.66           C  
ANISOU 1464  CE2 PHE B  87     6195   3385   4348    650    313     44       C  
ATOM   1465  CZ  PHE B  87      24.221 -54.654  19.189  1.00 37.67           C  
ANISOU 1465  CZ  PHE B  87     6581   3386   4344    769    336     96       C  
ATOM   1466  N   GLY B  88      27.390 -47.925  19.474  1.00 32.31           N  
ANISOU 1466  N   GLY B  88     4546   3632   4098    820   -120    155       N  
ATOM   1467  CA  GLY B  88      28.391 -46.878  19.450  1.00 30.87           C  
ANISOU 1467  CA  GLY B  88     4151   3623   3955    847   -186    165       C  
ATOM   1468  C   GLY B  88      27.915 -45.613  18.765  1.00 28.89           C  
ANISOU 1468  C   GLY B  88     3755   3420   3803    694   -196    133       C  
ATOM   1469  O   GLY B  88      26.716 -45.392  18.584  1.00 28.32           O  
ANISOU 1469  O   GLY B  88     3725   3260   3775    569   -171     97       O  
ATOM   1470  N   SER B  89      28.866 -44.787  18.360  1.00 24.29           N  
ANISOU 1470  N   SER B  89     3006   2978   3245    705   -231    138       N  
ATOM   1471  CA  SER B  89      28.537 -43.497  17.798  1.00 26.23           C  
ANISOU 1471  CA  SER B  89     3141   3259   3565    565   -246    115       C  
ATOM   1472  C   SER B  89      29.641 -43.027  16.871  1.00 28.82           C  
ANISOU 1472  C   SER B  89     3342   3714   3893    585   -248    119       C  
ATOM   1473  O   SER B  89      30.763 -43.536  16.908  1.00 31.22           O  
ANISOU 1473  O   SER B  89     3596   4120   4146    706   -248    126       O  
ATOM   1474  CB  SER B  89      28.334 -42.474  18.912  1.00 30.24           C  
ANISOU 1474  CB  SER B  89     3584   3804   4102    477   -293    104       C  
ATOM   1475  OG  SER B  89      29.578 -42.099  19.452  1.00 39.27           O  
ANISOU 1475  OG  SER B  89     4610   5095   5215    530   -328    116       O  
ATOM   1476  N   ASP B  90      29.303 -42.060  16.028  1.00 28.71           N  
ANISOU 1476  N   ASP B  90     3285   3695   3928    466   -247    105       N  
ATOM   1477  CA  ASP B  90      30.266 -41.449  15.139  1.00 27.98           C  
ANISOU 1477  CA  ASP B  90     3088   3714   3828    439   -236    102       C  
ATOM   1478  C   ASP B  90      29.882 -39.982  15.022  1.00 30.19           C  
ANISOU 1478  C   ASP B  90     3334   3985   4152    285   -263     91       C  
ATOM   1479  O   ASP B  90      28.747 -39.611  15.297  1.00 28.78           O  
ANISOU 1479  O   ASP B  90     3220   3701   4015    226   -288     81       O  
ATOM   1480  CB  ASP B  90      30.229 -42.137  13.773  1.00 27.18           C  
ANISOU 1480  CB  ASP B  90     3042   3573   3713    477   -188    103       C  
ATOM   1481  CG  ASP B  90      31.452 -41.815  12.913  1.00 32.18           C  
ANISOU 1481  CG  ASP B  90     3566   4345   4315    472   -159     91       C  
ATOM   1482  OD1 ASP B  90      32.469 -41.346  13.467  1.00 34.86           O  
ANISOU 1482  OD1 ASP B  90     3780   4831   4633    470   -172     76       O  
ATOM   1483  OD2 ASP B  90      31.394 -42.039  11.681  1.00 29.31           O1-
ANISOU 1483  OD2 ASP B  90     3241   3954   3943    461   -119     89       O1-
ATOM   1484  N   SER B  91      30.837 -39.141  14.654  1.00 31.06           N  
ANISOU 1484  N   SER B  91     3348   4208   4246    219   -254     83       N  
ATOM   1485  CA  SER B  91      30.536 -37.746  14.372  1.00 31.60           C  
ANISOU 1485  CA  SER B  91     3424   4245   4338     71   -272     76       C  
ATOM   1486  C   SER B  91      31.564 -37.202  13.398  1.00 32.08           C  
ANISOU 1486  C   SER B  91     3429   4403   4356     -3   -227     67       C  
ATOM   1487  O   SER B  91      32.690 -37.693  13.340  1.00 32.30           O  
ANISOU 1487  O   SER B  91     3354   4576   4343     49   -192     50       O  
ATOM   1488  CB  SER B  91      30.511 -36.905  15.645  1.00 34.09           C  
ANISOU 1488  CB  SER B  91     3692   4588   4673     11   -314     64       C  
ATOM   1489  OG  SER B  91      31.800 -36.828  16.216  1.00 41.98           O  
ANISOU 1489  OG  SER B  91     4559   5758   5633     19   -305     48       O  
ATOM   1490  N   ALA B  92      31.157 -36.199  12.629  1.00 30.10           N  
ANISOU 1490  N   ALA B  92     3256   4074   4107   -122   -229     72       N  
ATOM   1491  CA  ALA B  92      32.043 -35.523  11.696  1.00 31.21           C  
ANISOU 1491  CA  ALA B  92     3380   4286   4194   -233   -176     62       C  
ATOM   1492  C   ALA B  92      31.580 -34.084  11.567  1.00 31.71           C  
ANISOU 1492  C   ALA B  92     3544   4250   4256   -377   -202     67       C  
ATOM   1493  O   ALA B  92      30.399 -33.779  11.764  1.00 25.93           O  
ANISOU 1493  O   ALA B  92     2910   3375   3566   -359   -264     79       O  
ATOM   1494  CB  ALA B  92      32.027 -36.219  10.322  1.00 26.05           C  
ANISOU 1494  CB  ALA B  92     2783   3603   3510   -194   -132     72       C  
ATOM   1495  N   THR B  93      32.513 -33.205  11.219  1.00 31.91           N  
ANISOU 1495  N   THR B  93     3549   4352   4224   -522   -152     49       N  
ATOM   1496  CA  THR B  93      32.223 -31.786  11.137  1.00 32.73           C  
ANISOU 1496  CA  THR B  93     3775   4354   4307   -668   -168     54       C  
ATOM   1497  C   THR B  93      32.515 -31.237   9.742  1.00 34.47           C  
ANISOU 1497  C   THR B  93     4121   4527   4448   -785   -113     64       C  
ATOM   1498  O   THR B  93      33.507 -31.604   9.113  1.00 40.00           O  
ANISOU 1498  O   THR B  93     4746   5356   5095   -829    -32     42       O  
ATOM   1499  CB  THR B  93      33.015 -31.014  12.214  1.00 34.73           C  
ANISOU 1499  CB  THR B  93     3925   4720   4550   -776   -155     17       C  
ATOM   1500  CG2 THR B  93      32.747 -29.525  12.121  1.00 37.05           C  
ANISOU 1500  CG2 THR B  93     4373   4892   4814   -935   -164     20       C  
ATOM   1501  OG1 THR B  93      32.623 -31.485  13.518  1.00 32.71           O  
ANISOU 1501  OG1 THR B  93     3581   4487   4360   -665   -214     13       O  
ATOM   1502  N   VAL B  94      31.634 -30.383   9.242  1.00 27.65           N  
ANISOU 1502  N   VAL B  94     3456   3480   3570   -826   -160     92       N  
ATOM   1503  CA  VAL B  94      31.908 -29.705   7.984  1.00 31.69           C  
ANISOU 1503  CA  VAL B  94     4130   3924   3985   -952   -111    108       C  
ATOM   1504  C   VAL B  94      31.929 -28.211   8.249  1.00 34.80           C  
ANISOU 1504  C   VAL B  94     4668   4222   4333  -1107   -119    107       C  
ATOM   1505  O   VAL B  94      31.091 -27.688   8.987  1.00 32.95           O  
ANISOU 1505  O   VAL B  94     4491   3879   4148  -1059   -203    112       O  
ATOM   1506  CB  VAL B  94      30.897 -30.067   6.860  1.00 29.42           C  
ANISOU 1506  CB  VAL B  94     3998   3491   3689   -852   -159    144       C  
ATOM   1507  CG1 VAL B  94      29.450 -29.810   7.299  1.00 28.98           C  
ANISOU 1507  CG1 VAL B  94     4035   3280   3698   -735   -282    153       C  
ATOM   1508  CG2 VAL B  94      31.227 -29.299   5.549  1.00 33.22           C  
ANISOU 1508  CG2 VAL B  94     4679   3894   4050   -992   -108    165       C  
ATOM   1509  N   ASN B  95      32.918 -27.542   7.668  1.00 35.87           N  
ANISOU 1509  N   ASN B  95     4861   4401   4365  -1301    -22     92       N  
ATOM   1510  CA  ASN B  95      33.058 -26.100   7.783  1.00 37.10           C  
ANISOU 1510  CA  ASN B  95     5193   4452   4451  -1481     -6     89       C  
ATOM   1511  C   ASN B  95      32.437 -25.452   6.556  1.00 37.42           C  
ANISOU 1511  C   ASN B  95     5540   4277   4402  -1511    -29    139       C  
ATOM   1512  O   ASN B  95      32.894 -25.666   5.426  1.00 39.28           O  
ANISOU 1512  O   ASN B  95     5841   4529   4553  -1580     44    148       O  
ATOM   1513  CB  ASN B  95      34.537 -25.725   7.905  1.00 42.22           C  
ANISOU 1513  CB  ASN B  95     5732   5285   5023  -1705    127     27       C  
ATOM   1514  CG  ASN B  95      34.750 -24.297   8.368  1.00 46.20           C  
ANISOU 1514  CG  ASN B  95     6382   5705   5467  -1903    150      9       C  
ATOM   1515  ND2 ASN B  95      35.952 -24.010   8.852  1.00 47.03           N  
ANISOU 1515  ND2 ASN B  95     6336   6002   5530  -2087    252    -66       N  
ATOM   1516  OD1 ASN B  95      33.855 -23.461   8.284  1.00 48.64           O  
ANISOU 1516  OD1 ASN B  95     6937   5784   5760  -1888     77     53       O  
ATOM   1517  N   ILE B  96      31.371 -24.692   6.777  1.00 37.08           N  
ANISOU 1517  N   ILE B  96     5685   4031   4372  -1442   -137    166       N  
ATOM   1518  CA  ILE B  96      30.672 -24.013   5.697  1.00 36.89           C  
ANISOU 1518  CA  ILE B  96     5975   3785   4256  -1432   -188    211       C  
ATOM   1519  C   ILE B  96      31.242 -22.607   5.531  1.00 40.45           C  
ANISOU 1519  C   ILE B  96     6669   4122   4577  -1660   -125    215       C  
ATOM   1520  O   ILE B  96      31.248 -21.819   6.480  1.00 41.53           O  
ANISOU 1520  O   ILE B  96     6824   4222   4732  -1719   -141    193       O  
ATOM   1521  CB  ILE B  96      29.164 -23.902   5.977  1.00 33.81           C  
ANISOU 1521  CB  ILE B  96     5672   3238   3937  -1215   -351    223       C  
ATOM   1522  CG1 ILE B  96      28.556 -25.279   6.263  1.00 33.57           C  
ANISOU 1522  CG1 ILE B  96     5406   3317   4031  -1016   -402    207       C  
ATOM   1523  CG2 ILE B  96      28.459 -23.207   4.816  1.00 36.96           C  
ANISOU 1523  CG2 ILE B  96     6402   3415   4226  -1177   -420    264       C  
ATOM   1524  CD1 ILE B  96      28.731 -26.274   5.158  1.00 38.03           C  
ANISOU 1524  CD1 ILE B  96     5939   3943   4568   -977   -358    224       C  
ATOM   1525  N   HIS B  97      31.730 -22.306   4.332  1.00 38.29           N  
ANISOU 1525  N   HIS B  97     6591   3793   4164  -1800    -45    238       N  
ATOM   1526  CA  HIS B  97      32.323 -21.006   4.042  1.00 45.42           C  
ANISOU 1526  CA  HIS B  97     7765   4575   4916  -2048     38    240       C  
ATOM   1527  C   HIS B  97      31.394 -20.211   3.136  1.00 46.35           C  
ANISOU 1527  C   HIS B  97     8286   4399   4926  -1981    -56    304       C  
ATOM   1528  O   HIS B  97      31.110 -20.632   2.019  1.00 43.74           O  
ANISOU 1528  O   HIS B  97     8062   4019   4537  -1913    -74    342       O  
ATOM   1529  CB  HIS B  97      33.676 -21.179   3.342  1.00 48.91           C  
ANISOU 1529  CB  HIS B  97     8155   5177   5253  -2294    220    207       C  
ATOM   1530  CG  HIS B  97      34.625 -22.082   4.068  1.00 49.30           C  
ANISOU 1530  CG  HIS B  97     7799   5537   5395  -2324    303    133       C  
ATOM   1531  CD2 HIS B  97      34.839 -23.414   3.966  1.00 46.41           C  
ANISOU 1531  CD2 HIS B  97     7155   5366   5113  -2192    312    114       C  
ATOM   1532  ND1 HIS B  97      35.494 -21.625   5.038  1.00 48.85           N  
ANISOU 1532  ND1 HIS B  97     7596   5621   5343  -2496    381     63       N  
ATOM   1533  CE1 HIS B  97      36.204 -22.639   5.500  1.00 48.41           C  
ANISOU 1533  CE1 HIS B  97     7183   5842   5367  -2454    426      3       C  
ATOM   1534  NE2 HIS B  97      35.828 -23.736   4.865  1.00 46.27           N  
ANISOU 1534  NE2 HIS B  97     6836   5601   5145  -2267    387     35       N  
ATOM   1535  N   ILE B  98      30.909 -19.073   3.619  1.00 45.54           N  
ANISOU 1535  N   ILE B  98     8411   4101   4791  -1987   -125    313       N  
ATOM   1536  CA  ILE B  98      30.006 -18.253   2.825  1.00 46.61           C  
ANISOU 1536  CA  ILE B  98     8951   3947   4813  -1893   -234    369       C  
ATOM   1537  C   ILE B  98      30.790 -17.227   2.008  1.00 54.30           C  
ANISOU 1537  C   ILE B  98    10286   4773   5573  -2171   -111    395       C  
ATOM   1538  O   ILE B  98      31.656 -16.531   2.539  1.00 56.50           O  
ANISOU 1538  O   ILE B  98    10590   5076   5800  -2420      9    360       O  
ATOM   1539  CB  ILE B  98      28.981 -17.523   3.710  1.00 43.91           C  
ANISOU 1539  CB  ILE B  98     8706   3445   4534  -1725   -386    359       C  
ATOM   1540  CG1 ILE B  98      28.360 -18.490   4.731  1.00 39.62           C  
ANISOU 1540  CG1 ILE B  98     7782   3074   4199  -1512   -472    315       C  
ATOM   1541  CG2 ILE B  98      27.915 -16.859   2.852  1.00 45.77           C  
ANISOU 1541  CG2 ILE B  98     9326   3402   4662  -1552   -532    405       C  
ATOM   1542  CD1 ILE B  98      27.524 -19.585   4.110  1.00 39.24           C  
ANISOU 1542  CD1 ILE B  98     7617   3075   4216  -1276   -566    324       C  
ATOM   1543  N   ARG B  99      30.488 -17.149   0.715  1.00 61.17           N  
ANISOU 1543  N   ARG B  99    11439   5495   6309  -2138   -136    451       N  
ATOM   1544  CA  ARG B  99      31.137 -16.197  -0.184  1.00 66.09           C  
ANISOU 1544  CA  ARG B  99    12460   5948   6704  -2398    -21    483       C  
ATOM   1545  C   ARG B  99      30.261 -14.964  -0.386  1.00 67.62           C  
ANISOU 1545  C   ARG B  99    13126   5793   6775  -2302   -153    535       C  
ATOM   1546  O   ARG B  99      29.094 -15.082  -0.754  1.00 65.32           O  
ANISOU 1546  O   ARG B  99    12944   5373   6501  -2006   -338    569       O  
ATOM   1547  CB  ARG B  99      31.440 -16.855  -1.531  1.00 71.29           C  
ANISOU 1547  CB  ARG B  99    13167   6655   7264  -2442     45    513       C  
ATOM   1548  CG  ARG B  99      32.400 -18.039  -1.451  1.00 73.72           C  
ANISOU 1548  CG  ARG B  99    13042   7299   7668  -2543    186    455       C  
ATOM   1549  CD  ARG B  99      32.832 -18.514  -2.843  1.00 75.99           C  
ANISOU 1549  CD  ARG B  99    13426   7618   7828  -2637    279    476       C  
ATOM   1550  NE  ARG B  99      31.782 -19.267  -3.530  1.00 75.58           N  
ANISOU 1550  NE  ARG B  99    13383   7514   7820  -2343    128    523       N  
ATOM   1551  CZ  ARG B  99      31.908 -20.524  -3.948  1.00 71.43           C  
ANISOU 1551  CZ  ARG B  99    12583   7185   7372  -2259    153    504       C  
ATOM   1552  NH1 ARG B  99      33.046 -21.178  -3.757  1.00 71.77           N1+
ANISOU 1552  NH1 ARG B  99    12321   7490   7458  -2426    317    440       N1+
ATOM   1553  NH2 ARG B  99      30.895 -21.127  -4.562  1.00 65.74           N  
ANISOU 1553  NH2 ARG B  99    11894   6404   6681  -2004     13    540       N  
ATOM   1554  N   SER B 100      30.832 -13.786  -0.145  1.00 74.55           N  
ANISOU 1554  N   SER B 100    14281   6522   7521  -2549    -59    531       N  
ATOM   1555  CA  SER B 100      30.100 -12.520  -0.240  1.00 81.78           C  
ANISOU 1555  CA  SER B 100    15678   7087   8307  -2470   -174    575       C  
ATOM   1556  C   SER B 100      29.571 -12.225  -1.644  1.00 85.34           C  
ANISOU 1556  C   SER B 100    16568   7293   8565  -2375   -251    655       C  
ATOM   1557  O   SER B 100      30.169 -12.631  -2.640  1.00 85.88           O  
ANISOU 1557  O   SER B 100    16682   7421   8528  -2527   -137    678       O  
ATOM   1558  CB  SER B 100      30.980 -11.356   0.224  1.00 85.39           C  
ANISOU 1558  CB  SER B 100    16366   7438   8639  -2808    -20    550       C  
ATOM   1559  OG  SER B 100      31.333 -11.486   1.589  1.00 86.26           O  
ANISOU 1559  OG  SER B 100    16110   7746   8918  -2865     21    475       O  
ATOM   1560  N   ILE B 101      28.449 -11.507  -1.698  1.00 90.41           N  
ANISOU 1560  N   ILE B 101    17532   7663   9157  -2114   -450    689       N  
ATOM   1561  CA  ILE B 101      27.800 -11.095  -2.950  1.00 98.25           C  
ANISOU 1561  CA  ILE B 101    18987   8389   9953  -1969   -566    763       C  
ATOM   1562  C   ILE B 101      26.929 -12.191  -3.573  1.00100.26           C  
ANISOU 1562  C   ILE B 101    19031   8764  10300  -1655   -718    769       C  
ATOM   1563  O   ILE B 101      25.736 -11.986  -3.806  1.00100.10           O  
ANISOU 1563  O   ILE B 101    19176   8593  10266  -1323   -939    779       O  
ATOM   1564  CB  ILE B 101      28.812 -10.568  -4.005  1.00 99.87           C  
ANISOU 1564  CB  ILE B 101    19583   8465   9896  -2322   -374    815       C  
ATOM   1565  OXT ILE B 101      27.383 -13.302  -3.854  1.00100.28           O1-
ANISOU 1565  OXT ILE B 101    18693   9020  10387  -1721   -625    754       O1-
HETATM 1566  O1  SO4 B 102      15.572 -34.314  19.571  1.00 81.66           O  
HETATM 1567  O2  SO4 B 102      13.758 -32.857  19.040  1.00 84.84           O  
HETATM 1568  O3  SO4 B 102      13.918 -33.795  21.215  1.00 86.38           O1-
HETATM 1569  O4  SO4 B 102      15.485 -32.136  20.540  1.00 78.49           O  
HETATM 1570  S   SO4 B 102      14.688 -33.273  20.089  1.00 82.16           S  
HETATM 1571  O1  SO4 B 103      25.465 -39.620  19.540  1.00103.63           O  
HETATM 1572  O2  SO4 B 103      24.214 -38.939  21.443  1.00101.28           O  
HETATM 1573  O3  SO4 B 103      26.284 -40.102  21.723  1.00100.63           O1-
HETATM 1574  O4  SO4 B 103      26.280 -37.855  20.925  1.00101.67           O  
HETATM 1575  S   SO4 B 103      25.561 -39.127  20.911  1.00102.17           S  
HETATM 1576  O1  SO4 B 104      18.046 -17.307  10.758  0.88110.46           O  
HETATM 1577  O2  SO4 B 104      15.949 -17.603   9.659  0.88110.60           O  
HETATM 1578  O3  SO4 B 104      16.501 -18.949  11.550  0.88111.47           O1-
HETATM 1579  O4  SO4 B 104      16.031 -16.633  11.839  0.88112.13           O  
HETATM 1580  S   SO4 B 104      16.633 -17.623  10.950  0.88111.60           S  
HETATM 1581  O   HOH B 105      17.443 -36.368  16.111  1.00 44.25           O  
HETATM 1582  O   HOH B 106      25.579 -33.308  16.133  1.00 20.95           O  
HETATM 1583  O   HOH B 107      19.239 -19.298  12.786  1.00 57.86           O  
HETATM 1584  O   HOH B 108      22.630 -38.624  17.075  1.00 22.78           O  
HETATM 1585  O   HOH B 109      19.193 -32.677  13.915  1.00 24.83           O  
HETATM 1586  O   HOH B 110      25.191 -26.827  -1.515  1.00 38.00           O  
HETATM 1587  O   HOH B 111      35.240 -18.701   5.900  1.00 71.10           O  
HETATM 1588  O   HOH B 112      28.799 -49.363  10.157  1.00 56.62           O  
HETATM 1589  O   HOH B 113      33.014 -47.740  17.255  1.00 61.85           O  
HETATM 1590  O   HOH B 114      15.320 -40.571  20.832  1.00 27.69           O  
HETATM 1591  O   HOH B 115      30.303 -15.835   7.124  1.00 40.12           O  
HETATM 1592  O   HOH B 116      11.157 -29.449   6.454  1.00 40.17           O  
HETATM 1593  O   HOH B 117      25.403 -32.933  -0.793  1.00 35.52           O  
HETATM 1594  O   HOH B 118      20.933 -21.949  13.043  1.00 55.35           O  
HETATM 1595  O   HOH B 119      27.992 -21.596  -4.825  1.00 42.39           O  
HETATM 1596  O   HOH B 120      14.647 -19.891   9.834  1.00 50.24           O  
HETATM 1597  O   HOH B 121      34.412 -34.097   7.835  1.00 43.20           O  
HETATM 1598  O   HOH B 122      22.058 -20.828  15.653  1.00 52.51           O  
HETATM 1599  O   HOH B 123      17.207 -40.069  13.571  1.00 29.92           O  
HETATM 1600  O   HOH B 124      17.525 -44.255   1.512  1.00 56.36           O  
HETATM 1601  O   HOH B 125      17.005 -25.274  15.388  1.00 59.77           O  
HETATM 1602  O   HOH B 126      24.324 -12.536   8.037  1.00 55.65           O  
HETATM 1603  O   HOH B 127      17.919 -35.015  12.566  1.00 38.72           O  
HETATM 1604  O   HOH B 128      31.978 -22.421  13.869  1.00 35.58           O  
HETATM 1605  O   HOH B 129      33.266 -38.949   7.220  1.00 61.53           O  
HETATM 1606  O   HOH B 130      12.594 -31.220   5.637  1.00 42.20           O  
HETATM 1607  O   HOH B 131      28.670 -50.877   8.084  1.00 57.48           O  
HETATM 1608  O   HOH B 132      33.530 -41.365  10.069  1.00 60.71           O  
HETATM 1609  O   HOH B 133      27.694 -45.723  25.837  1.00 52.82           O  
HETATM 1610  O   HOH B 134      18.036 -37.678   2.881  1.00 30.65           O  
HETATM 1611  O   HOH B 135      36.632 -31.425   1.892  1.00 61.25           O  
HETATM 1612  O   HOH B 136      27.640 -33.658   0.210  1.00 62.59           O  
HETATM 1613  O   HOH B 137      23.016 -21.295  10.783  1.00 40.91           O  
HETATM 1614  O   HOH B 138      22.077 -26.968  -3.026  1.00 40.74           O  
HETATM 1615  O   HOH B 139      17.221 -30.160  21.144  1.00 40.21           O  
HETATM 1616  O   HOH B 140      28.267 -39.839   2.114  1.00 27.38           O  
HETATM 1617  O   HOH B 141      13.461 -36.846   8.358  1.00 40.24           O  
HETATM 1618  O   HOH B 142      23.710 -50.149  24.495  1.00 44.72           O  
HETATM 1619  O   HOH B 143      24.115 -36.520  22.894  1.00 47.37           O  
HETATM 1620  O   HOH B 144      15.479 -34.531  12.445  1.00 52.00           O  
HETATM 1621  O   HOH B 145      22.584 -23.166  16.977  1.00 50.62           O  
HETATM 1622  O   HOH B 146      14.740 -38.730  11.745  1.00 61.32           O  
HETATM 1623  O   HOH B 147      31.717 -17.982   6.240  1.00 41.44           O  
HETATM 1624  O   HOH B 148      33.237 -52.320  16.703  1.00 61.42           O  
HETATM 1625  O   HOH B 149      28.276 -47.571  23.316  1.00 56.77           O  
HETATM 1626  O   HOH B 150      13.395 -34.405   9.709  1.00 52.16           O  
HETATM 1627  O   HOH B 151      33.839 -21.230  16.725  1.00 52.64           O  
HETATM 1628  O   HOH B 152      17.522 -51.066  11.967  1.00 59.94           O  
HETATM 1629  O   HOH B 153      34.224 -21.659  12.778  1.00 41.52           O  
HETATM 1630  O   HOH B 154      34.598 -21.100   9.796  1.00 48.42           O  
HETATM 1631  O   HOH B 155      24.040 -50.589   8.078  1.00 42.73           O  
HETATM 1632  O   HOH B 156      26.394 -46.048  22.634  1.00 52.58           O  
HETATM 1633  O   HOH B 157      27.294 -26.143  -3.044  1.00 67.43           O  
HETATM 1634  O   HOH B 158      31.688 -45.795  18.956  1.00 45.86           O  
HETATM 1635  O   HOH B 159      31.592 -48.802  19.489  1.00 46.43           O  
HETATM 1636  O   HOH B 160      29.047 -41.408  -0.131  1.00 40.61           O  
HETATM 1637  O   HOH B 161      31.255 -40.183  18.349  1.00 55.90           O  
HETATM 1638  O   HOH B 162      29.935 -38.240  19.338  1.00 64.29           O  
HETATM 1639  O   HOH B 163      28.327 -57.535  14.310  1.00 33.62           O  
HETATM 1640  O   HOH B 164      23.456 -24.014  -4.291  1.00 48.40           O  
HETATM 1641  O   HOH B 165      33.085 -34.141  14.705  1.00 45.60           O  
HETATM 1642  O   HOH B 166      36.038 -29.722   9.206  1.00 57.39           O  
HETATM 1643  O   HOH B 167      27.560 -28.384  17.504  1.00 28.19           O  
HETATM 1644  O   HOH B 168      28.156 -18.157  12.255  1.00 33.90           O  
HETATM 1645  O   HOH B 169      14.570 -32.198  13.275  1.00 45.26           O  
HETATM 1646  O   HOH B 170      19.552 -25.043  23.292  1.00 32.03           O  
HETATM 1647  O   HOH B 171      20.259 -35.681  19.914  1.00 38.22           O  
HETATM 1648  O   HOH B 172      31.120 -46.306  15.593  1.00 60.80           O  
HETATM 1649  O   HOH B 173      21.569 -38.022  21.289  1.00 37.85           O  
HETATM 1650  O   HOH B 174      31.603 -23.804  16.493  1.00 48.11           O  
HETATM 1651  O   HOH B 175      21.875 -18.355  11.387  1.00 59.16           O  
HETATM 1652  O   HOH B 176      17.722 -25.621  25.431  1.00 56.47           O  
HETATM 1653  O   HOH B 177      26.169 -42.881  22.769  1.00 48.11           O  
HETATM 1654  O   HOH B 178      28.951 -35.687  18.770  1.00 62.72           O  
HETATM 1655  O   HOH B 179      18.512 -36.777  19.044  1.00 42.65           O  
HETATM 1656  O   HOH B 180       8.324 -29.241   5.315  1.00 51.70           O  
HETATM 1657  O   HOH B 181      26.875 -42.438  -1.275  1.00 49.97           O  
HETATM 1658  O   HOH B 182      35.183 -34.218  11.135  1.00 46.91           O  
HETATM 1659  O   HOH B 183      16.137 -42.665  10.008  1.00 51.13           O  
HETATM 1660  O   HOH B 184      17.668 -19.910  -1.443  1.00 55.40           O  
HETATM 1661  O   HOH B 185      32.651 -26.464  -2.012  1.00 46.46           O  
HETATM 1662  O   HOH B 186      24.010 -36.409  19.038  1.00 62.81           O  
HETATM 1663  O   HOH B 187      25.973 -44.987   0.000  0.50 44.97           O  
CONECT  749  753
CONECT  750  753
CONECT  751  753
CONECT  752  753
CONECT  753  749  750  751  752
CONECT 1566 1570
CONECT 1567 1570
CONECT 1568 1570
CONECT 1569 1570
CONECT 1570 1566 1567 1568 1569
CONECT 1571 1575
CONECT 1572 1575
CONECT 1573 1575
CONECT 1574 1575
CONECT 1575 1571 1572 1573 1574
CONECT 1576 1580
CONECT 1577 1580
CONECT 1578 1580
CONECT 1579 1580
CONECT 1580 1576 1577 1578 1579
END
