# Supplementary material
Source: publisher figshare collection journal article supplement (https://plos.figshare.com/articles/dataset/_/11411415)
Supplement: Supplementary file 1 [file 1 › pone.0226693.s023.pdb]

REMARK Modified from 1NCU (titin M5)
REMARK sequence renumbered: original residue number +6
CRYST1    1.000    1.000    1.000  90.00  90.00  90.00 P 1           1          
ORIGX1      1.000000  0.000000  0.000000        0.00000                         
ORIGX2      0.000000  1.000000  0.000000        0.00000                         
ORIGX3      0.000000  0.000000  1.000000        0.00000                         
SCALE1      1.000000  0.000000  0.000000        0.00000                         
SCALE2      0.000000  1.000000  0.000000        0.00000                         
SCALE3      0.000000  0.000000  1.000000        0.00000       
ATOM      1  N   SER A   0      20.046   7.595   3.245  1.00  0.00           N  
ATOM      2  CA  SER A   0      19.530   6.413   2.496  1.00  0.00           C  
ATOM      3  C   SER A   0      20.590   5.900   1.519  1.00  0.00           C  
ATOM      4  O   SER A   0      20.294   5.567   0.389  1.00  0.00           O  
ATOM      5  CB  SER A   0      18.311   6.929   1.736  1.00  0.00           C  
ATOM      6  OG  SER A   0      17.482   5.831   1.377  1.00  0.00           O  
ATOM      7  HA  SER A   0      19.236   5.632   3.179  1.00  0.00           H  
ATOM      8  HB2 SER A   0      17.753   7.604   2.363  1.00  0.00           H  
ATOM      9  HB3 SER A   0      18.638   7.453   0.848  1.00  0.00           H  
ATOM     10  HG  SER A   0      17.414   5.252   2.139  1.00  0.00           H  
ATOM     11  N   LYS A   1      21.822   5.836   1.946  1.00  0.00           N  
ATOM     12  CA  LYS A   1      22.903   5.347   1.040  1.00  0.00           C  
ATOM     13  C   LYS A   1      24.236   5.228   1.796  1.00  0.00           C  
ATOM     14  O   LYS A   1      25.296   5.382   1.221  1.00  0.00           O  
ATOM     15  CB  LYS A   1      22.985   6.402  -0.084  1.00  0.00           C  
ATOM     16  CG  LYS A   1      23.799   7.635   0.357  1.00  0.00           C  
ATOM     17  CD  LYS A   1      23.313   8.134   1.722  1.00  0.00           C  
ATOM     18  CE  LYS A   1      23.743   9.590   1.918  1.00  0.00           C  
ATOM     19  NZ  LYS A   1      22.649  10.208   2.718  1.00  0.00           N1+
ATOM     20  H   LYS A   1      22.036   6.112   2.861  1.00  0.00           H  
ATOM     21  HA  LYS A   1      22.629   4.391   0.620  1.00  0.00           H  
ATOM     22  HB2 LYS A   1      23.455   5.960  -0.949  1.00  0.00           H  
ATOM     23  HB3 LYS A   1      21.986   6.716  -0.348  1.00  0.00           H  
ATOM     24  HG2 LYS A   1      24.843   7.367   0.426  1.00  0.00           H  
ATOM     25  HG3 LYS A   1      23.680   8.421  -0.373  1.00  0.00           H  
ATOM     26  HD2 LYS A   1      22.236   8.067   1.768  1.00  0.00           H  
ATOM     27  HD3 LYS A   1      23.745   7.525   2.504  1.00  0.00           H  
ATOM     28  HE2 LYS A   1      24.679   9.635   2.458  1.00  0.00           H  
ATOM     29  HE3 LYS A   1      23.831  10.088   0.965  1.00  0.00           H  
ATOM     30  HZ1 LYS A   1      21.729   9.865   2.372  1.00  0.00           H  
ATOM     31  HZ2 LYS A   1      22.762   9.949   3.719  1.00  0.00           H  
ATOM     32  HZ3 LYS A   1      22.691  11.242   2.624  1.00  0.00           H  
ATOM     33  N   THR A   2      24.198   4.963   3.074  1.00  0.00           N  
ATOM     34  CA  THR A   2      25.475   4.850   3.838  1.00  0.00           C  
ATOM     35  C   THR A   2      25.304   3.943   5.062  1.00  0.00           C  
ATOM     36  O   THR A   2      26.158   3.134   5.365  1.00  0.00           O  
ATOM     37  CB  THR A   2      25.802   6.279   4.272  1.00  0.00           C  
ATOM     38  CG2 THR A   2      24.624   6.861   5.055  1.00  0.00           C  
ATOM     39  OG1 THR A   2      26.961   6.269   5.094  1.00  0.00           O  
ATOM     40  H   THR A   2      23.339   4.844   3.529  1.00  0.00           H  
ATOM     41  HA  THR A   2      26.259   4.474   3.202  1.00  0.00           H  
ATOM     42  HB  THR A   2      25.984   6.888   3.400  1.00  0.00           H  
ATOM     43  HG1 THR A   2      27.368   7.137   5.043  1.00  0.00           H  
ATOM     44 HG21 THR A   2      23.707   6.672   4.517  1.00  0.00           H  
ATOM     45 HG22 THR A   2      24.574   6.395   6.028  1.00  0.00           H  
ATOM     46 HG23 THR A   2      24.760   7.925   5.172  1.00  0.00           H  
ATOM     47  N   THR A   3      24.217   4.071   5.773  1.00  0.00           N  
ATOM     48  CA  THR A   3      24.021   3.211   6.979  1.00  0.00           C  
ATOM     49  C   THR A   3      22.567   3.267   7.457  1.00  0.00           C  
ATOM     50  O   THR A   3      22.292   3.247   8.640  1.00  0.00           O  
ATOM     51  CB  THR A   3      24.947   3.809   8.037  1.00  0.00           C  
ATOM     52  CG2 THR A   3      24.545   5.261   8.297  1.00  0.00           C  
ATOM     53  OG1 THR A   3      24.836   3.060   9.240  1.00  0.00           O  
ATOM     54  H   THR A   3      23.537   4.733   5.521  1.00  0.00           H  
ATOM     55  HA  THR A   3      24.311   2.194   6.770  1.00  0.00           H  
ATOM     56  HB  THR A   3      25.966   3.779   7.684  1.00  0.00           H  
ATOM     57  HG1 THR A   3      24.863   2.128   9.012  1.00  0.00           H  
ATOM     58 HG21 THR A   3      23.570   5.446   7.870  1.00  0.00           H  
ATOM     59 HG22 THR A   3      24.513   5.441   9.361  1.00  0.00           H  
ATOM     60 HG23 THR A   3      25.268   5.921   7.841  1.00  0.00           H  
ATOM     61  N   LEU A   4      21.638   3.339   6.549  1.00  0.00           N  
ATOM     62  CA  LEU A   4      20.214   3.398   6.939  1.00  0.00           C  
ATOM     63  C   LEU A   4      19.565   2.023   6.753  1.00  0.00           C  
ATOM     64  O   LEU A   4      20.177   1.092   6.272  1.00  0.00           O  
ATOM     65  CB  LEU A   4      19.614   4.426   5.980  1.00  0.00           C  
ATOM     66  CG  LEU A   4      18.200   4.782   6.422  1.00  0.00           C  
ATOM     67  CD1 LEU A   4      17.958   6.269   6.201  1.00  0.00           C  
ATOM     68  CD2 LEU A   4      17.205   3.982   5.591  1.00  0.00           C  
ATOM     69  H   LEU A   4      21.872   3.357   5.609  1.00  0.00           H  
ATOM     70  HA  LEU A   4      20.110   3.736   7.958  1.00  0.00           H  
ATOM     71  HB2 LEU A   4      20.226   5.316   5.980  1.00  0.00           H  
ATOM     72  HB3 LEU A   4      19.583   4.011   4.984  1.00  0.00           H  
ATOM     73  HG  LEU A   4      18.076   4.550   7.468  1.00  0.00           H  
ATOM     74 HD11 LEU A   4      18.442   6.577   5.287  1.00  0.00           H  
ATOM     75 HD12 LEU A   4      16.897   6.450   6.129  1.00  0.00           H  
ATOM     76 HD13 LEU A   4      18.365   6.824   7.032  1.00  0.00           H  
ATOM     77 HD21 LEU A   4      17.701   3.119   5.171  1.00  0.00           H  
ATOM     78 HD22 LEU A   4      16.390   3.657   6.219  1.00  0.00           H  
ATOM     79 HD23 LEU A   4      16.823   4.600   4.793  1.00  0.00           H  
ATOM     80  N   ALA A   5      18.331   1.899   7.134  1.00  0.00           N  
ATOM     81  CA  ALA A   5      17.615   0.599   6.995  1.00  0.00           C  
ATOM     82  C   ALA A   5      16.254   0.834   6.327  1.00  0.00           C  
ATOM     83  O   ALA A   5      16.149   1.573   5.378  1.00  0.00           O  
ATOM     84  CB  ALA A   5      17.454   0.093   8.430  1.00  0.00           C  
ATOM     85  H   ALA A   5      17.871   2.665   7.515  1.00  0.00           H  
ATOM     86  HA  ALA A   5      18.201  -0.103   6.418  1.00  0.00           H  
ATOM     87  HB1 ALA A   5      18.414   0.101   8.924  1.00  0.00           H  
ATOM     88  HB2 ALA A   5      16.769   0.736   8.963  1.00  0.00           H  
ATOM     89  HB3 ALA A   5      17.066  -0.914   8.415  1.00  0.00           H  
ATOM     90  N   ALA A   6      15.213   0.208   6.799  1.00  0.00           N  
ATOM     91  CA  ALA A   6      13.877   0.412   6.165  1.00  0.00           C  
ATOM     92  C   ALA A   6      12.858   0.834   7.223  1.00  0.00           C  
ATOM     93  O   ALA A   6      12.541   0.086   8.126  1.00  0.00           O  
ATOM     94  CB  ALA A   6      13.500  -0.945   5.569  1.00  0.00           C  
ATOM     95  H   ALA A   6      15.305  -0.394   7.560  1.00  0.00           H  
ATOM     96  HA  ALA A   6      13.941   1.154   5.382  1.00  0.00           H  
ATOM     97  HB1 ALA A   6      14.396  -1.488   5.310  1.00  0.00           H  
ATOM     98  HB2 ALA A   6      12.932  -1.511   6.293  1.00  0.00           H  
ATOM     99  HB3 ALA A   6      12.902  -0.794   4.682  1.00  0.00           H  
ATOM    100  N   ARG A   7      12.343   2.026   7.120  1.00  0.00           N  
ATOM    101  CA  ARG A   7      11.346   2.490   8.124  1.00  0.00           C  
ATOM    102  C   ARG A   7      10.203   3.234   7.433  1.00  0.00           C  
ATOM    103  O   ARG A   7      10.262   3.532   6.257  1.00  0.00           O  
ATOM    104  CB  ARG A   7      12.121   3.432   9.047  1.00  0.00           C  
ATOM    105  CG  ARG A   7      12.705   4.586   8.229  1.00  0.00           C  
ATOM    106  CD  ARG A   7      12.687   5.865   9.069  1.00  0.00           C  
ATOM    107  NE  ARG A   7      13.896   6.622   8.640  1.00  0.00           N  
ATOM    108  CZ  ARG A   7      14.243   7.714   9.267  1.00  0.00           C  
ATOM    109  NH1 ARG A   7      13.343   8.428   9.887  1.00  0.00           N1+
ATOM    110  NH2 ARG A   7      15.492   8.093   9.273  1.00  0.00           N  
ATOM    111  H   ARG A   7      12.611   2.615   6.384  1.00  0.00           H  
ATOM    112  HA  ARG A   7      10.965   1.654   8.688  1.00  0.00           H  
ATOM    113  HB2 ARG A   7      11.454   3.825   9.800  1.00  0.00           H  
ATOM    114  HB3 ARG A   7      12.923   2.890   9.523  1.00  0.00           H  
ATOM    115  HG2 ARG A   7      13.722   4.351   7.950  1.00  0.00           H  
ATOM    116  HG3 ARG A   7      12.112   4.735   7.339  1.00  0.00           H  
ATOM    117  HD2 ARG A   7      11.791   6.435   8.865  1.00  0.00           H  
ATOM    118  HD3 ARG A   7      12.754   5.627  10.119  1.00  0.00           H  
ATOM    119  HE  ARG A   7      14.433   6.299   7.886  1.00  0.00           H  
ATOM    120 HH11 ARG A   7      12.385   8.139   9.883  1.00  0.00           H  
ATOM    121 HH12 ARG A   7      13.610   9.264  10.367  1.00  0.00           H  
ATOM    122 HH21 ARG A   7      16.182   7.548   8.798  1.00  0.00           H  
ATOM    123 HH22 ARG A   7      15.758   8.930   9.752  1.00  0.00           H  
ATOM    124  N   ILE A   8       9.164   3.538   8.159  1.00  0.00           N  
ATOM    125  CA  ILE A   8       8.016   4.266   7.551  1.00  0.00           C  
ATOM    126  C   ILE A   8       7.993   5.713   8.049  1.00  0.00           C  
ATOM    127  O   ILE A   8       7.886   5.974   9.230  1.00  0.00           O  
ATOM    128  CB  ILE A   8       6.772   3.520   8.029  1.00  0.00           C  
ATOM    129  CG1 ILE A   8       6.817   2.059   7.530  1.00  0.00           C  
ATOM    130  CG2 ILE A   8       5.519   4.237   7.512  1.00  0.00           C  
ATOM    131  CD1 ILE A   8       6.343   1.947   6.071  1.00  0.00           C  
ATOM    132  H   ILE A   8       9.141   3.292   9.105  1.00  0.00           H  
ATOM    133  HA  ILE A   8       8.076   4.236   6.474  1.00  0.00           H  
ATOM    134  HB  ILE A   8       6.756   3.527   9.110  1.00  0.00           H  
ATOM    135 HG12 ILE A   8       7.831   1.694   7.601  1.00  0.00           H  
ATOM    136 HG13 ILE A   8       6.181   1.454   8.157  1.00  0.00           H  
ATOM    137 HG21 ILE A   8       5.728   4.678   6.548  1.00  0.00           H  
ATOM    138 HG22 ILE A   8       4.712   3.526   7.416  1.00  0.00           H  
ATOM    139 HG23 ILE A   8       5.235   5.013   8.208  1.00  0.00           H  
ATOM    140 HD11 ILE A   8       6.821   2.709   5.475  1.00  0.00           H  
ATOM    141 HD12 ILE A   8       6.601   0.972   5.682  1.00  0.00           H  
ATOM    142 HD13 ILE A   8       5.271   2.077   6.029  1.00  0.00           H  
ATOM    143  N   LEU A   9       8.097   6.652   7.154  1.00  0.00           N  
ATOM    144  CA  LEU A   9       8.087   8.087   7.557  1.00  0.00           C  
ATOM    145  C   LEU A   9       6.654   8.623   7.580  1.00  0.00           C  
ATOM    146  O   LEU A   9       6.172   9.105   8.586  1.00  0.00           O  
ATOM    147  CB  LEU A   9       8.907   8.786   6.475  1.00  0.00           C  
ATOM    148  CG  LEU A   9       9.174  10.234   6.875  1.00  0.00           C  
ATOM    149  CD1 LEU A   9      10.665  10.534   6.711  1.00  0.00           C  
ATOM    150  CD2 LEU A   9       8.362  11.167   5.972  1.00  0.00           C  
ATOM    151  H   LEU A   9       8.187   6.414   6.211  1.00  0.00           H  
ATOM    152  HA  LEU A   9       8.554   8.215   8.515  1.00  0.00           H  
ATOM    153  HB2 LEU A   9       9.847   8.269   6.347  1.00  0.00           H  
ATOM    154  HB3 LEU A   9       8.360   8.770   5.546  1.00  0.00           H  
ATOM    155  HG  LEU A   9       8.886  10.384   7.906  1.00  0.00           H  
ATOM    156 HD11 LEU A   9      11.017  10.108   5.782  1.00  0.00           H  
ATOM    157 HD12 LEU A   9      10.819  11.602   6.698  1.00  0.00           H  
ATOM    158 HD13 LEU A   9      11.212  10.100   7.535  1.00  0.00           H  
ATOM    159 HD21 LEU A   9       7.759  10.580   5.294  1.00  0.00           H  
ATOM    160 HD22 LEU A   9       7.719  11.787   6.579  1.00  0.00           H  
ATOM    161 HD23 LEU A   9       9.033  11.793   5.403  1.00  0.00           H  
ATOM    162  N   THR A  10       5.974   8.535   6.476  1.00  0.00           N  
ATOM    163  CA  THR A  10       4.565   9.028   6.415  1.00  0.00           C  
ATOM    164  C   THR A  10       3.666   7.949   5.816  1.00  0.00           C  
ATOM    165  O   THR A  10       3.201   8.070   4.704  1.00  0.00           O  
ATOM    166  CB  THR A  10       4.603  10.245   5.492  1.00  0.00           C  
ATOM    167  CG2 THR A  10       3.299  11.032   5.631  1.00  0.00           C  
ATOM    168  OG1 THR A  10       5.699  11.074   5.846  1.00  0.00           O  
ATOM    169  H   THR A  10       6.390   8.137   5.686  1.00  0.00           H  
ATOM    170  HA  THR A  10       4.218   9.314   7.395  1.00  0.00           H  
ATOM    171  HB  THR A  10       4.711   9.915   4.470  1.00  0.00           H  
ATOM    172  HG1 THR A  10       5.517  11.457   6.707  1.00  0.00           H  
ATOM    173 HG21 THR A  10       2.481  10.347   5.797  1.00  0.00           H  
ATOM    174 HG22 THR A  10       3.375  11.711   6.468  1.00  0.00           H  
ATOM    175 HG23 THR A  10       3.120  11.595   4.727  1.00  0.00           H  
ATOM    176  N   LYS A  11       3.434   6.893   6.542  1.00  0.00           N  
ATOM    177  CA  LYS A  11       2.584   5.785   6.027  1.00  0.00           C  
ATOM    178  C   LYS A  11       1.299   6.309   5.368  1.00  0.00           C  
ATOM    179  O   LYS A  11       0.992   7.483   5.442  1.00  0.00           O  
ATOM    180  CB  LYS A  11       2.241   4.959   7.269  1.00  0.00           C  
ATOM    181  CG  LYS A  11       1.420   5.811   8.240  1.00  0.00           C  
ATOM    182  CD  LYS A  11       1.934   5.602   9.666  1.00  0.00           C  
ATOM    183  CE  LYS A  11       3.185   6.455   9.887  1.00  0.00           C  
ATOM    184  NZ  LYS A  11       3.521   6.281  11.328  1.00  0.00           N1+
ATOM    185  H   LYS A  11       3.832   6.818   7.430  1.00  0.00           H  
ATOM    186  HA  LYS A  11       3.143   5.182   5.329  1.00  0.00           H  
ATOM    187  HB2 LYS A  11       1.667   4.093   6.979  1.00  0.00           H  
ATOM    188  HB3 LYS A  11       3.149   4.642   7.754  1.00  0.00           H  
ATOM    189  HG2 LYS A  11       1.515   6.853   7.972  1.00  0.00           H  
ATOM    190  HG3 LYS A  11       0.382   5.518   8.187  1.00  0.00           H  
ATOM    191  HD2 LYS A  11       1.169   5.893  10.371  1.00  0.00           H  
ATOM    192  HD3 LYS A  11       2.180   4.561   9.811  1.00  0.00           H  
ATOM    193  HE2 LYS A  11       3.995   6.100   9.264  1.00  0.00           H  
ATOM    194  HE3 LYS A  11       2.975   7.492   9.680  1.00  0.00           H  
ATOM    195  HZ1 LYS A  11       3.377   5.286  11.600  1.00  0.00           H  
ATOM    196  HZ2 LYS A  11       4.514   6.544  11.487  1.00  0.00           H  
ATOM    197  HZ3 LYS A  11       2.907   6.891  11.904  1.00  0.00           H  
ATOM    198  N   PRO A  12       0.581   5.400   4.753  1.00  0.00           N  
ATOM    199  CA  PRO A  12      -0.684   5.743   4.082  1.00  0.00           C  
ATOM    200  C   PRO A  12      -1.835   5.631   5.082  1.00  0.00           C  
ATOM    201  O   PRO A  12      -1.778   4.857   6.016  1.00  0.00           O  
ATOM    202  CB  PRO A  12      -0.805   4.676   2.994  1.00  0.00           C  
ATOM    203  CG  PRO A  12       0.007   3.506   3.478  1.00  0.00           C  
ATOM    204  CD  PRO A  12       0.875   3.971   4.628  1.00  0.00           C  
ATOM    205  HA  PRO A  12      -0.640   6.726   3.643  1.00  0.00           H  
ATOM    206  HB2 PRO A  12      -1.841   4.387   2.874  1.00  0.00           H  
ATOM    207  HB3 PRO A  12      -0.409   5.038   2.056  1.00  0.00           H  
ATOM    208  HG2 PRO A  12      -0.654   2.719   3.814  1.00  0.00           H  
ATOM    209  HG3 PRO A  12       0.633   3.140   2.679  1.00  0.00           H  
ATOM    210  HD2 PRO A  12       0.603   3.453   5.535  1.00  0.00           H  
ATOM    211  HD3 PRO A  12       1.921   3.825   4.407  1.00  0.00           H  
ATOM    212  N   ARG A  13      -2.878   6.389   4.901  1.00  0.00           N  
ATOM    213  CA  ARG A  13      -4.018   6.303   5.855  1.00  0.00           C  
ATOM    214  C   ARG A  13      -5.008   5.242   5.385  1.00  0.00           C  
ATOM    215  O   ARG A  13      -4.720   4.452   4.508  1.00  0.00           O  
ATOM    216  CB  ARG A  13      -4.676   7.684   5.837  1.00  0.00           C  
ATOM    217  CG  ARG A  13      -3.626   8.763   6.102  1.00  0.00           C  
ATOM    218  CD  ARG A  13      -3.469   9.628   4.852  1.00  0.00           C  
ATOM    219  NE  ARG A  13      -3.388  11.026   5.358  1.00  0.00           N  
ATOM    220  CZ  ARG A  13      -4.277  11.906   4.987  1.00  0.00           C  
ATOM    221  NH1 ARG A  13      -4.682  11.942   3.746  1.00  0.00           N1+
ATOM    222  NH2 ARG A  13      -4.763  12.750   5.856  1.00  0.00           N  
ATOM    223  H   ARG A  13      -2.913   7.009   4.142  1.00  0.00           H  
ATOM    224  HA  ARG A  13      -3.663   6.076   6.848  1.00  0.00           H  
ATOM    225  HB2 ARG A  13      -5.129   7.851   4.870  1.00  0.00           H  
ATOM    226  HB3 ARG A  13      -5.436   7.729   6.602  1.00  0.00           H  
ATOM    227  HG2 ARG A  13      -3.943   9.379   6.931  1.00  0.00           H  
ATOM    228  HG3 ARG A  13      -2.681   8.298   6.337  1.00  0.00           H  
ATOM    229  HD2 ARG A  13      -2.564   9.361   4.325  1.00  0.00           H  
ATOM    230  HD3 ARG A  13      -4.328   9.516   4.209  1.00  0.00           H  
ATOM    231  HE  ARG A  13      -2.667  11.285   5.970  1.00  0.00           H  
ATOM    232 HH11 ARG A  13      -4.310  11.295   3.080  1.00  0.00           H  
ATOM    233 HH12 ARG A  13      -5.364  12.616   3.462  1.00  0.00           H  
ATOM    234 HH21 ARG A  13      -4.453  12.722   6.806  1.00  0.00           H  
ATOM    235 HH22 ARG A  13      -5.444  13.424   5.572  1.00  0.00           H  
ATOM    236  N   SER A  14      -6.172   5.221   5.958  1.00  0.00           N  
ATOM    237  CA  SER A  14      -7.186   4.219   5.547  1.00  0.00           C  
ATOM    238  C   SER A  14      -8.331   4.922   4.819  1.00  0.00           C  
ATOM    239  O   SER A  14      -8.245   6.090   4.494  1.00  0.00           O  
ATOM    240  CB  SER A  14      -7.668   3.604   6.856  1.00  0.00           C  
ATOM    241  OG  SER A  14      -6.565   3.470   7.740  1.00  0.00           O  
ATOM    242  H   SER A  14      -6.383   5.867   6.660  1.00  0.00           H  
ATOM    243  HA  SER A  14      -6.742   3.461   4.919  1.00  0.00           H  
ATOM    244  HB2 SER A  14      -8.410   4.242   7.306  1.00  0.00           H  
ATOM    245  HB3 SER A  14      -8.099   2.639   6.658  1.00  0.00           H  
ATOM    246  HG  SER A  14      -6.099   2.662   7.512  1.00  0.00           H  
ATOM    247  N   MET A  15      -9.398   4.228   4.554  1.00  0.00           N  
ATOM    248  CA  MET A  15     -10.534   4.868   3.843  1.00  0.00           C  
ATOM    249  C   MET A  15     -11.733   3.930   3.794  1.00  0.00           C  
ATOM    250  O   MET A  15     -11.655   2.769   4.145  1.00  0.00           O  
ATOM    251  CB  MET A  15     -10.016   5.128   2.436  1.00  0.00           C  
ATOM    252  CG  MET A  15     -10.608   6.428   1.894  1.00  0.00           C  
ATOM    253  SD  MET A  15     -10.036   7.827   2.892  1.00  0.00           S  
ATOM    254  CE  MET A  15      -8.484   8.115   2.006  1.00  0.00           C  
ATOM    255  H   MET A  15      -9.452   3.289   4.818  1.00  0.00           H  
ATOM    256  HA  MET A  15     -10.801   5.799   4.310  1.00  0.00           H  
ATOM    257  HB2 MET A  15      -8.949   5.209   2.465  1.00  0.00           H  
ATOM    258  HB3 MET A  15     -10.299   4.309   1.794  1.00  0.00           H  
ATOM    259  HG2 MET A  15     -10.291   6.564   0.876  1.00  0.00           H  
ATOM    260  HG3 MET A  15     -11.682   6.376   1.929  1.00  0.00           H  
ATOM    261  HE1 MET A  15      -8.437   7.470   1.144  1.00  0.00           H  
ATOM    262  HE2 MET A  15      -8.440   9.146   1.686  1.00  0.00           H  
ATOM    263  HE3 MET A  15      -7.652   7.898   2.662  1.00  0.00           H  
ATOM    264  N   THR A  16     -12.839   4.434   3.350  1.00  0.00           N  
ATOM    265  CA  THR A  16     -14.063   3.592   3.255  1.00  0.00           C  
ATOM    266  C   THR A  16     -14.962   4.105   2.133  1.00  0.00           C  
ATOM    267  O   THR A  16     -15.352   5.256   2.114  1.00  0.00           O  
ATOM    268  CB  THR A  16     -14.752   3.735   4.611  1.00  0.00           C  
ATOM    269  CG2 THR A  16     -15.980   2.826   4.658  1.00  0.00           C  
ATOM    270  OG1 THR A  16     -13.846   3.365   5.641  1.00  0.00           O  
ATOM    271  H   THR A  16     -12.860   5.370   3.066  1.00  0.00           H  
ATOM    272  HA  THR A  16     -13.798   2.563   3.081  1.00  0.00           H  
ATOM    273  HB  THR A  16     -15.062   4.758   4.751  1.00  0.00           H  
ATOM    274  HG1 THR A  16     -13.644   2.433   5.539  1.00  0.00           H  
ATOM    275 HG21 THR A  16     -16.248   2.532   3.654  1.00  0.00           H  
ATOM    276 HG22 THR A  16     -15.755   1.947   5.243  1.00  0.00           H  
ATOM    277 HG23 THR A  16     -16.805   3.358   5.109  1.00  0.00           H  
ATOM    278  N   VAL A  17     -15.292   3.265   1.194  1.00  0.00           N  
ATOM    279  CA  VAL A  17     -16.159   3.715   0.077  1.00  0.00           C  
ATOM    280  C   VAL A  17     -17.092   2.586  -0.356  1.00  0.00           C  
ATOM    281  O   VAL A  17     -17.219   1.581   0.312  1.00  0.00           O  
ATOM    282  CB  VAL A  17     -15.189   4.048  -1.049  1.00  0.00           C  
ATOM    283  CG1 VAL A  17     -14.247   5.168  -0.610  1.00  0.00           C  
ATOM    284  CG2 VAL A  17     -14.370   2.808  -1.391  1.00  0.00           C  
ATOM    285  H   VAL A  17     -14.968   2.351   1.220  1.00  0.00           H  
ATOM    286  HA  VAL A  17     -16.717   4.589   0.353  1.00  0.00           H  
ATOM    287  HB  VAL A  17     -15.744   4.361  -1.913  1.00  0.00           H  
ATOM    288 HG11 VAL A  17     -14.800   5.901  -0.043  1.00  0.00           H  
ATOM    289 HG12 VAL A  17     -13.460   4.755   0.003  1.00  0.00           H  
ATOM    290 HG13 VAL A  17     -13.816   5.636  -1.483  1.00  0.00           H  
ATOM    291 HG21 VAL A  17     -13.905   2.428  -0.494  1.00  0.00           H  
ATOM    292 HG22 VAL A  17     -15.020   2.054  -1.809  1.00  0.00           H  
ATOM    293 HG23 VAL A  17     -13.609   3.068  -2.110  1.00  0.00           H  
ATOM    294  N   TYR A  18     -17.729   2.736  -1.480  1.00  0.00           N  
ATOM    295  CA  TYR A  18     -18.628   1.659  -1.971  1.00  0.00           C  
ATOM    296  C   TYR A  18     -17.815   0.704  -2.840  1.00  0.00           C  
ATOM    297  O   TYR A  18     -18.079  -0.479  -2.915  1.00  0.00           O  
ATOM    298  CB  TYR A  18     -19.691   2.366  -2.806  1.00  0.00           C  
ATOM    299  CG  TYR A  18     -21.000   1.636  -2.641  1.00  0.00           C  
ATOM    300  CD1 TYR A  18     -21.662   1.657  -1.408  1.00  0.00           C  
ATOM    301  CD2 TYR A  18     -21.543   0.924  -3.716  1.00  0.00           C  
ATOM    302  CE1 TYR A  18     -22.869   0.966  -1.251  1.00  0.00           C  
ATOM    303  CE2 TYR A  18     -22.750   0.233  -3.560  1.00  0.00           C  
ATOM    304  CZ  TYR A  18     -23.413   0.254  -2.327  1.00  0.00           C  
ATOM    305  OH  TYR A  18     -24.603  -0.429  -2.171  1.00  0.00           O  
ATOM    306  H   TYR A  18     -17.602   3.549  -2.010  1.00  0.00           H  
ATOM    307  HA  TYR A  18     -19.085   1.136  -1.147  1.00  0.00           H  
ATOM    308  HB2 TYR A  18     -19.793   3.387  -2.471  1.00  0.00           H  
ATOM    309  HB3 TYR A  18     -19.401   2.354  -3.846  1.00  0.00           H  
ATOM    310  HD1 TYR A  18     -21.242   2.207  -0.579  1.00  0.00           H  
ATOM    311  HD2 TYR A  18     -21.031   0.908  -4.666  1.00  0.00           H  
ATOM    312  HE1 TYR A  18     -23.377   0.979  -0.299  1.00  0.00           H  
ATOM    313  HE2 TYR A  18     -23.166  -0.319  -4.389  1.00  0.00           H  
ATOM    314  HH  TYR A  18     -24.450  -1.155  -1.563  1.00  0.00           H  
ATOM    315  N   GLU A  19     -16.816   1.228  -3.491  1.00  0.00           N  
ATOM    316  CA  GLU A  19     -15.948   0.390  -4.362  1.00  0.00           C  
ATOM    317  C   GLU A  19     -14.613   1.122  -4.590  1.00  0.00           C  
ATOM    318  O   GLU A  19     -13.920   1.447  -3.648  1.00  0.00           O  
ATOM    319  CB  GLU A  19     -16.743   0.219  -5.663  1.00  0.00           C  
ATOM    320  CG  GLU A  19     -17.146   1.592  -6.210  1.00  0.00           C  
ATOM    321  CD  GLU A  19     -17.520   1.463  -7.687  1.00  0.00           C  
ATOM    322  OE1 GLU A  19     -17.970   0.397  -8.072  1.00  0.00           O  
ATOM    323  OE2 GLU A  19     -17.350   2.433  -8.408  1.00  0.00           O1-
ATOM    324  H   GLU A  19     -16.632   2.188  -3.400  1.00  0.00           H  
ATOM    325  HA  GLU A  19     -15.775  -0.572  -3.904  1.00  0.00           H  
ATOM    326  HB2 GLU A  19     -16.131  -0.293  -6.392  1.00  0.00           H  
ATOM    327  HB3 GLU A  19     -17.631  -0.363  -5.467  1.00  0.00           H  
ATOM    328  HG2 GLU A  19     -17.991   1.964  -5.654  1.00  0.00           H  
ATOM    329  HG3 GLU A  19     -16.320   2.279  -6.109  1.00  0.00           H  
ATOM    330  N   GLY A  20     -14.244   1.402  -5.814  1.00  0.00           N  
ATOM    331  CA  GLY A  20     -12.964   2.125  -6.050  1.00  0.00           C  
ATOM    332  C   GLY A  20     -13.278   3.573  -6.426  1.00  0.00           C  
ATOM    333  O   GLY A  20     -13.000   4.016  -7.523  1.00  0.00           O  
ATOM    334  H   GLY A  20     -14.805   1.151  -6.574  1.00  0.00           H  
ATOM    335  HA2 GLY A  20     -12.364   2.103  -5.151  1.00  0.00           H  
ATOM    336  HA3 GLY A  20     -12.427   1.654  -6.857  1.00  0.00           H  
ATOM    337  N   GLU A  21     -13.870   4.310  -5.525  1.00  0.00           N  
ATOM    338  CA  GLU A  21     -14.221   5.727  -5.830  1.00  0.00           C  
ATOM    339  C   GLU A  21     -12.961   6.582  -5.969  1.00  0.00           C  
ATOM    340  O   GLU A  21     -12.488   6.836  -7.059  1.00  0.00           O  
ATOM    341  CB  GLU A  21     -15.061   6.192  -4.640  1.00  0.00           C  
ATOM    342  CG  GLU A  21     -16.547   6.056  -4.980  1.00  0.00           C  
ATOM    343  CD  GLU A  21     -17.384   6.398  -3.747  1.00  0.00           C  
ATOM    344  OE1 GLU A  21     -17.595   5.511  -2.939  1.00  0.00           O  
ATOM    345  OE2 GLU A  21     -17.799   7.539  -3.633  1.00  0.00           O1-
ATOM    346  H   GLU A  21     -14.092   3.928  -4.649  1.00  0.00           H  
ATOM    347  HA  GLU A  21     -14.806   5.781  -6.730  1.00  0.00           H  
ATOM    348  HB2 GLU A  21     -14.831   5.582  -3.778  1.00  0.00           H  
ATOM    349  HB3 GLU A  21     -14.836   7.225  -4.423  1.00  0.00           H  
ATOM    350  HG2 GLU A  21     -16.796   6.733  -5.784  1.00  0.00           H  
ATOM    351  HG3 GLU A  21     -16.757   5.042  -5.284  1.00  0.00           H  
ATOM    352  N   SER A  22     -12.417   7.034  -4.876  1.00  0.00           N  
ATOM    353  CA  SER A  22     -11.193   7.880  -4.954  1.00  0.00           C  
ATOM    354  C   SER A  22     -10.344   7.715  -3.693  1.00  0.00           C  
ATOM    355  O   SER A  22      -9.959   8.681  -3.064  1.00  0.00           O  
ATOM    356  CB  SER A  22     -11.709   9.309  -5.067  1.00  0.00           C  
ATOM    357  OG  SER A  22     -10.630  10.172  -5.398  1.00  0.00           O  
ATOM    358  H   SER A  22     -12.816   6.822  -4.007  1.00  0.00           H  
ATOM    359  HA  SER A  22     -10.619   7.630  -5.829  1.00  0.00           H  
ATOM    360  HB2 SER A  22     -12.459   9.365  -5.838  1.00  0.00           H  
ATOM    361  HB3 SER A  22     -12.144   9.605  -4.124  1.00  0.00           H  
ATOM    362  HG  SER A  22     -10.114   9.750  -6.088  1.00  0.00           H  
ATOM    363  N   ALA A  23     -10.042   6.502  -3.323  1.00  0.00           N  
ATOM    364  CA  ALA A  23      -9.211   6.284  -2.107  1.00  0.00           C  
ATOM    365  C   ALA A  23      -7.728   6.240  -2.488  1.00  0.00           C  
ATOM    366  O   ALA A  23      -7.168   5.186  -2.714  1.00  0.00           O  
ATOM    367  CB  ALA A  23      -9.664   4.933  -1.552  1.00  0.00           C  
ATOM    368  H   ALA A  23     -10.356   5.736  -3.846  1.00  0.00           H  
ATOM    369  HA  ALA A  23      -9.391   7.061  -1.381  1.00  0.00           H  
ATOM    370  HB1 ALA A  23     -10.697   4.763  -1.817  1.00  0.00           H  
ATOM    371  HB2 ALA A  23      -9.052   4.148  -1.970  1.00  0.00           H  
ATOM    372  HB3 ALA A  23      -9.565   4.934  -0.476  1.00  0.00           H  
ATOM    373  N   ARG A  24      -7.092   7.378  -2.565  1.00  0.00           N  
ATOM    374  CA  ARG A  24      -5.646   7.403  -2.934  1.00  0.00           C  
ATOM    375  C   ARG A  24      -4.785   7.370  -1.669  1.00  0.00           C  
ATOM    376  O   ARG A  24      -5.180   7.855  -0.628  1.00  0.00           O  
ATOM    377  CB  ARG A  24      -5.448   8.719  -3.687  1.00  0.00           C  
ATOM    378  CG  ARG A  24      -4.408   8.522  -4.792  1.00  0.00           C  
ATOM    379  CD  ARG A  24      -3.508   9.758  -4.873  1.00  0.00           C  
ATOM    380  NE  ARG A  24      -2.551   9.610  -3.741  1.00  0.00           N  
ATOM    381  CZ  ARG A  24      -2.203  10.654  -3.041  1.00  0.00           C  
ATOM    382  NH1 ARG A  24      -1.276  11.459  -3.485  1.00  0.00           N1+
ATOM    383  NH2 ARG A  24      -2.782  10.895  -1.896  1.00  0.00           N  
ATOM    384  H   ARG A  24      -7.564   8.217  -2.382  1.00  0.00           H  
ATOM    385  HA  ARG A  24      -5.407   6.569  -3.576  1.00  0.00           H  
ATOM    386  HB2 ARG A  24      -6.386   9.027  -4.125  1.00  0.00           H  
ATOM    387  HB3 ARG A  24      -5.103   9.478  -3.002  1.00  0.00           H  
ATOM    388  HG2 ARG A  24      -3.807   7.652  -4.570  1.00  0.00           H  
ATOM    389  HG3 ARG A  24      -4.909   8.382  -5.738  1.00  0.00           H  
ATOM    390  HD2 ARG A  24      -2.980   9.775  -5.816  1.00  0.00           H  
ATOM    391  HD3 ARG A  24      -4.091  10.657  -4.749  1.00  0.00           H  
ATOM    392  HE  ARG A  24      -2.183   8.728  -3.523  1.00  0.00           H  
ATOM    393 HH11 ARG A  24      -0.833  11.274  -4.363  1.00  0.00           H  
ATOM    394 HH12 ARG A  24      -1.010  12.259  -2.949  1.00  0.00           H  
ATOM    395 HH21 ARG A  24      -3.492  10.278  -1.556  1.00  0.00           H  
ATOM    396 HH22 ARG A  24      -2.516  11.696  -1.360  1.00  0.00           H  
ATOM    397  N   PHE A  25      -3.615   6.798  -1.750  1.00  0.00           N  
ATOM    398  CA  PHE A  25      -2.734   6.727  -0.542  1.00  0.00           C  
ATOM    399  C   PHE A  25      -1.275   6.965  -0.920  1.00  0.00           C  
ATOM    400  O   PHE A  25      -0.871   6.767  -2.047  1.00  0.00           O  
ATOM    401  CB  PHE A  25      -2.895   5.304   0.000  1.00  0.00           C  
ATOM    402  CG  PHE A  25      -4.356   5.001   0.196  1.00  0.00           C  
ATOM    403  CD1 PHE A  25      -5.120   5.795   1.053  1.00  0.00           C  
ATOM    404  CD2 PHE A  25      -4.946   3.935  -0.488  1.00  0.00           C  
ATOM    405  CE1 PHE A  25      -6.480   5.528   1.225  1.00  0.00           C  
ATOM    406  CE2 PHE A  25      -6.305   3.665  -0.316  1.00  0.00           C  
ATOM    407  CZ  PHE A  25      -7.074   4.463   0.540  1.00  0.00           C  
ATOM    408  H   PHE A  25      -3.319   6.412  -2.600  1.00  0.00           H  
ATOM    409  HA  PHE A  25      -3.054   7.441   0.200  1.00  0.00           H  
ATOM    410  HB2 PHE A  25      -2.473   4.601  -0.704  1.00  0.00           H  
ATOM    411  HB3 PHE A  25      -2.380   5.219   0.946  1.00  0.00           H  
ATOM    412  HD1 PHE A  25      -4.658   6.617   1.581  1.00  0.00           H  
ATOM    413  HD2 PHE A  25      -4.351   3.317  -1.144  1.00  0.00           H  
ATOM    414  HE1 PHE A  25      -7.070   6.140   1.887  1.00  0.00           H  
ATOM    415  HE2 PHE A  25      -6.761   2.842  -0.845  1.00  0.00           H  
ATOM    416  HZ  PHE A  25      -8.126   4.255   0.672  1.00  0.00           H  
ATOM    417  N   SER A  26      -0.477   7.374   0.023  1.00  0.00           N  
ATOM    418  CA  SER A  26       0.962   7.601  -0.271  1.00  0.00           C  
ATOM    419  C   SER A  26       1.792   7.391   0.993  1.00  0.00           C  
ATOM    420  O   SER A  26       1.585   8.037   2.002  1.00  0.00           O  
ATOM    421  CB  SER A  26       1.059   9.048  -0.752  1.00  0.00           C  
ATOM    422  OG  SER A  26       1.176   9.915   0.368  1.00  0.00           O  
ATOM    423  H   SER A  26      -0.821   7.516   0.929  1.00  0.00           H  
ATOM    424  HA  SER A  26       1.292   6.929  -1.050  1.00  0.00           H  
ATOM    425  HB2 SER A  26       1.929   9.160  -1.377  1.00  0.00           H  
ATOM    426  HB3 SER A  26       0.175   9.294  -1.322  1.00  0.00           H  
ATOM    427  HG  SER A  26       0.653  10.700   0.191  1.00  0.00           H  
ATOM    428  N   CYS A  27       2.736   6.500   0.949  1.00  0.00           N  
ATOM    429  CA  CYS A  27       3.581   6.266   2.144  1.00  0.00           C  
ATOM    430  C   CYS A  27       5.031   6.588   1.806  1.00  0.00           C  
ATOM    431  O   CYS A  27       5.609   6.015   0.910  1.00  0.00           O  
ATOM    432  CB  CYS A  27       3.409   4.787   2.481  1.00  0.00           C  
ATOM    433  SG  CYS A  27       3.888   3.773   1.062  1.00  0.00           S  
ATOM    434  H   CYS A  27       2.895   5.992   0.128  1.00  0.00           H  
ATOM    435  HA  CYS A  27       3.244   6.873   2.965  1.00  0.00           H  
ATOM    436  HB2 CYS A  27       4.032   4.541   3.325  1.00  0.00           H  
ATOM    437  HB3 CYS A  27       2.376   4.596   2.725  1.00  0.00           H  
ATOM    438  HG  CYS A  27       4.204   2.929   1.394  1.00  0.00           H  
ATOM    439  N   ASP A  28       5.625   7.508   2.505  1.00  0.00           N  
ATOM    440  CA  ASP A  28       7.036   7.858   2.194  1.00  0.00           C  
ATOM    441  C   ASP A  28       7.968   6.982   3.013  1.00  0.00           C  
ATOM    442  O   ASP A  28       8.058   7.109   4.211  1.00  0.00           O  
ATOM    443  CB  ASP A  28       7.199   9.327   2.578  1.00  0.00           C  
ATOM    444  CG  ASP A  28       6.048  10.160   2.000  1.00  0.00           C  
ATOM    445  OD1 ASP A  28       5.317   9.634   1.175  1.00  0.00           O  
ATOM    446  OD2 ASP A  28       5.918  11.307   2.393  1.00  0.00           O1-
ATOM    447  H   ASP A  28       5.149   7.970   3.227  1.00  0.00           H  
ATOM    448  HA  ASP A  28       7.231   7.727   1.145  1.00  0.00           H  
ATOM    449  HB2 ASP A  28       7.204   9.410   3.650  1.00  0.00           H  
ATOM    450  HB3 ASP A  28       8.134   9.695   2.189  1.00  0.00           H  
ATOM    451  N   THR A  29       8.650   6.083   2.377  1.00  0.00           N  
ATOM    452  CA  THR A  29       9.569   5.186   3.126  1.00  0.00           C  
ATOM    453  C   THR A  29      10.989   5.329   2.593  1.00  0.00           C  
ATOM    454  O   THR A  29      11.218   5.337   1.402  1.00  0.00           O  
ATOM    455  CB  THR A  29       9.051   3.771   2.874  1.00  0.00           C  
ATOM    456  CG2 THR A  29       7.546   3.713   3.146  1.00  0.00           C  
ATOM    457  OG1 THR A  29       9.304   3.413   1.522  1.00  0.00           O  
ATOM    458  H   THR A  29       8.551   5.989   1.410  1.00  0.00           H  
ATOM    459  HA  THR A  29       9.537   5.408   4.181  1.00  0.00           H  
ATOM    460  HB  THR A  29       9.560   3.083   3.531  1.00  0.00           H  
ATOM    461  HG1 THR A  29      10.135   2.934   1.493  1.00  0.00           H  
ATOM    462 HG21 THR A  29       7.273   4.507   3.825  1.00  0.00           H  
ATOM    463 HG22 THR A  29       7.008   3.834   2.217  1.00  0.00           H  
ATOM    464 HG23 THR A  29       7.295   2.760   3.585  1.00  0.00           H  
ATOM    465  N   ASP A  30      11.945   5.434   3.466  1.00  0.00           N  
ATOM    466  CA  ASP A  30      13.357   5.567   3.001  1.00  0.00           C  
ATOM    467  C   ASP A  30      14.071   4.222   3.108  1.00  0.00           C  
ATOM    468  O   ASP A  30      13.617   3.319   3.782  1.00  0.00           O  
ATOM    469  CB  ASP A  30      14.005   6.589   3.931  1.00  0.00           C  
ATOM    470  CG  ASP A  30      15.385   6.967   3.386  1.00  0.00           C  
ATOM    471  OD1 ASP A  30      15.435   7.622   2.358  1.00  0.00           O  
ATOM    472  OD2 ASP A  30      16.368   6.591   4.003  1.00  0.00           O1-
ATOM    473  H   ASP A  30      11.734   5.418   4.425  1.00  0.00           H  
ATOM    474  HA  ASP A  30      13.384   5.926   1.984  1.00  0.00           H  
ATOM    475  HB2 ASP A  30      13.385   7.471   3.985  1.00  0.00           H  
ATOM    476  HB3 ASP A  30      14.114   6.162   4.916  1.00  0.00           H  
ATOM    477  N   GLY A  31      15.187   4.082   2.452  1.00  0.00           N  
ATOM    478  CA  GLY A  31      15.932   2.795   2.518  1.00  0.00           C  
ATOM    479  C   GLY A  31      17.194   2.882   1.660  1.00  0.00           C  
ATOM    480  O   GLY A  31      17.138   3.145   0.475  1.00  0.00           O  
ATOM    481  H   GLY A  31      15.538   4.826   1.921  1.00  0.00           H  
ATOM    482  HA2 GLY A  31      16.211   2.601   3.539  1.00  0.00           H  
ATOM    483  HA3 GLY A  31      15.306   1.994   2.157  1.00  0.00           H  
ATOM    484  N   GLU A  32      18.336   2.675   2.258  1.00  0.00           N  
ATOM    485  CA  GLU A  32      19.611   2.756   1.488  1.00  0.00           C  
ATOM    486  C   GLU A  32      19.930   1.403   0.811  1.00  0.00           C  
ATOM    487  O   GLU A  32      19.847   0.375   1.450  1.00  0.00           O  
ATOM    488  CB  GLU A  32      20.670   3.085   2.540  1.00  0.00           C  
ATOM    489  CG  GLU A  32      20.712   1.972   3.589  1.00  0.00           C  
ATOM    490  CD  GLU A  32      22.057   1.248   3.509  1.00  0.00           C  
ATOM    491  OE1 GLU A  32      23.032   1.797   3.993  1.00  0.00           O  
ATOM    492  OE2 GLU A  32      22.089   0.157   2.965  1.00  0.00           O1-
ATOM    493  H   GLU A  32      18.355   2.476   3.218  1.00  0.00           H  
ATOM    494  HA  GLU A  32      19.556   3.549   0.765  1.00  0.00           H  
ATOM    495  HB2 GLU A  32      21.636   3.170   2.064  1.00  0.00           H  
ATOM    496  HB3 GLU A  32      20.421   4.017   3.022  1.00  0.00           H  
ATOM    497  HG2 GLU A  32      20.590   2.401   4.571  1.00  0.00           H  
ATOM    498  HG3 GLU A  32      19.915   1.270   3.405  1.00  0.00           H  
ATOM    499  N   PRO A  33      20.298   1.428  -0.460  1.00  0.00           N  
ATOM    500  CA  PRO A  33      20.397   2.691  -1.242  1.00  0.00           C  
ATOM    501  C   PRO A  33      18.995   3.176  -1.592  1.00  0.00           C  
ATOM    502  O   PRO A  33      18.728   4.357  -1.680  1.00  0.00           O  
ATOM    503  CB  PRO A  33      21.167   2.287  -2.495  1.00  0.00           C  
ATOM    504  CG  PRO A  33      20.912   0.823  -2.650  1.00  0.00           C  
ATOM    505  CD  PRO A  33      20.666   0.261  -1.272  1.00  0.00           C  
ATOM    506  HA  PRO A  33      20.935   3.439  -0.694  1.00  0.00           H  
ATOM    507  HB2 PRO A  33      20.795   2.830  -3.354  1.00  0.00           H  
ATOM    508  HB3 PRO A  33      22.222   2.466  -2.362  1.00  0.00           H  
ATOM    509  HG2 PRO A  33      20.043   0.665  -3.274  1.00  0.00           H  
ATOM    510  HG3 PRO A  33      21.773   0.343  -3.088  1.00  0.00           H  
ATOM    511  HD2 PRO A  33      19.856  -0.456  -1.297  1.00  0.00           H  
ATOM    512  HD3 PRO A  33      21.564  -0.194  -0.883  1.00  0.00           H  
ATOM    513  N   VAL A  34      18.101   2.254  -1.780  1.00  0.00           N  
ATOM    514  CA  VAL A  34      16.698   2.607  -2.113  1.00  0.00           C  
ATOM    515  C   VAL A  34      15.757   1.618  -1.401  1.00  0.00           C  
ATOM    516  O   VAL A  34      16.010   0.429  -1.393  1.00  0.00           O  
ATOM    517  CB  VAL A  34      16.618   2.475  -3.639  1.00  0.00           C  
ATOM    518  CG1 VAL A  34      15.159   2.379  -4.087  1.00  0.00           C  
ATOM    519  CG2 VAL A  34      17.260   3.706  -4.283  1.00  0.00           C  
ATOM    520  H   VAL A  34      18.354   1.317  -1.693  1.00  0.00           H  
ATOM    521  HA  VAL A  34      16.486   3.621  -1.814  1.00  0.00           H  
ATOM    522  HB  VAL A  34      17.148   1.587  -3.951  1.00  0.00           H  
ATOM    523 HG11 VAL A  34      14.538   2.944  -3.408  1.00  0.00           H  
ATOM    524 HG12 VAL A  34      15.063   2.780  -5.084  1.00  0.00           H  
ATOM    525 HG13 VAL A  34      14.850   1.344  -4.082  1.00  0.00           H  
ATOM    526 HG21 VAL A  34      17.493   4.432  -3.518  1.00  0.00           H  
ATOM    527 HG22 VAL A  34      18.167   3.415  -4.791  1.00  0.00           H  
ATOM    528 HG23 VAL A  34      16.573   4.141  -4.993  1.00  0.00           H  
ATOM    529  N   PRO A  35      14.710   2.139  -0.813  1.00  0.00           N  
ATOM    530  CA  PRO A  35      13.749   1.276  -0.084  1.00  0.00           C  
ATOM    531  C   PRO A  35      12.854   0.507  -1.061  1.00  0.00           C  
ATOM    532  O   PRO A  35      12.942   0.668  -2.262  1.00  0.00           O  
ATOM    533  CB  PRO A  35      12.927   2.268   0.732  1.00  0.00           C  
ATOM    534  CG  PRO A  35      13.023   3.562  -0.010  1.00  0.00           C  
ATOM    535  CD  PRO A  35      14.324   3.555  -0.768  1.00  0.00           C  
ATOM    536  HA  PRO A  35      14.267   0.598   0.575  1.00  0.00           H  
ATOM    537  HB2 PRO A  35      11.898   1.941   0.791  1.00  0.00           H  
ATOM    538  HB3 PRO A  35      13.344   2.378   1.718  1.00  0.00           H  
ATOM    539  HG2 PRO A  35      12.194   3.651  -0.697  1.00  0.00           H  
ATOM    540  HG3 PRO A  35      13.017   4.385   0.687  1.00  0.00           H  
ATOM    541  HD2 PRO A  35      14.180   3.943  -1.767  1.00  0.00           H  
ATOM    542  HD3 PRO A  35      15.072   4.127  -0.242  1.00  0.00           H  
ATOM    543  N   THR A  36      11.991  -0.325  -0.545  1.00  0.00           N  
ATOM    544  CA  THR A  36      11.078  -1.110  -1.427  1.00  0.00           C  
ATOM    545  C   THR A  36       9.680  -1.145  -0.807  1.00  0.00           C  
ATOM    546  O   THR A  36       9.537  -1.248   0.393  1.00  0.00           O  
ATOM    547  CB  THR A  36      11.670  -2.522  -1.471  1.00  0.00           C  
ATOM    548  CG2 THR A  36      11.365  -3.162  -2.825  1.00  0.00           C  
ATOM    549  OG1 THR A  36      13.077  -2.463  -1.278  1.00  0.00           O  
ATOM    550  H   THR A  36      11.939  -0.432   0.428  1.00  0.00           H  
ATOM    551  HA  THR A  36      11.046  -0.686  -2.418  1.00  0.00           H  
ATOM    552  HB  THR A  36      11.226  -3.120  -0.690  1.00  0.00           H  
ATOM    553  HG1 THR A  36      13.311  -3.115  -0.614  1.00  0.00           H  
ATOM    554 HG21 THR A  36      10.631  -2.565  -3.347  1.00  0.00           H  
ATOM    555 HG22 THR A  36      12.270  -3.214  -3.411  1.00  0.00           H  
ATOM    556 HG23 THR A  36      10.976  -4.158  -2.672  1.00  0.00           H  
ATOM    557  N   VAL A  37       8.648  -1.061  -1.602  1.00  0.00           N  
ATOM    558  CA  VAL A  37       7.274  -1.092  -1.022  1.00  0.00           C  
ATOM    559  C   VAL A  37       6.496  -2.314  -1.523  1.00  0.00           C  
ATOM    560  O   VAL A  37       6.611  -2.720  -2.663  1.00  0.00           O  
ATOM    561  CB  VAL A  37       6.615   0.228  -1.463  1.00  0.00           C  
ATOM    562  CG1 VAL A  37       6.093   0.125  -2.895  1.00  0.00           C  
ATOM    563  CG2 VAL A  37       5.447   0.549  -0.530  1.00  0.00           C  
ATOM    564  H   VAL A  37       8.775  -0.978  -2.570  1.00  0.00           H  
ATOM    565  HA  VAL A  37       7.332  -1.118   0.049  1.00  0.00           H  
ATOM    566  HB  VAL A  37       7.341   1.023  -1.410  1.00  0.00           H  
ATOM    567 HG11 VAL A  37       6.569  -0.701  -3.394  1.00  0.00           H  
ATOM    568 HG12 VAL A  37       5.025  -0.034  -2.873  1.00  0.00           H  
ATOM    569 HG13 VAL A  37       6.312   1.039  -3.422  1.00  0.00           H  
ATOM    570 HG21 VAL A  37       5.198  -0.326   0.050  1.00  0.00           H  
ATOM    571 HG22 VAL A  37       5.728   1.354   0.133  1.00  0.00           H  
ATOM    572 HG23 VAL A  37       4.591   0.849  -1.117  1.00  0.00           H  
ATOM    573  N   THR A  38       5.697  -2.896  -0.678  1.00  0.00           N  
ATOM    574  CA  THR A  38       4.901  -4.075  -1.098  1.00  0.00           C  
ATOM    575  C   THR A  38       3.544  -4.021  -0.408  1.00  0.00           C  
ATOM    576  O   THR A  38       3.439  -4.218   0.777  1.00  0.00           O  
ATOM    577  CB  THR A  38       5.702  -5.292  -0.632  1.00  0.00           C  
ATOM    578  CG2 THR A  38       5.370  -6.496  -1.518  1.00  0.00           C  
ATOM    579  OG1 THR A  38       7.090  -5.004  -0.713  1.00  0.00           O  
ATOM    580  H   THR A  38       5.612  -2.551   0.238  1.00  0.00           H  
ATOM    581  HA  THR A  38       4.784  -4.092  -2.170  1.00  0.00           H  
ATOM    582  HB  THR A  38       5.445  -5.523   0.389  1.00  0.00           H  
ATOM    583  HG1 THR A  38       7.358  -4.621   0.125  1.00  0.00           H  
ATOM    584 HG21 THR A  38       4.353  -6.413  -1.872  1.00  0.00           H  
ATOM    585 HG22 THR A  38       6.044  -6.519  -2.362  1.00  0.00           H  
ATOM    586 HG23 THR A  38       5.478  -7.405  -0.946  1.00  0.00           H  
ATOM    587  N   TRP A  39       2.503  -3.751  -1.133  1.00  0.00           N  
ATOM    588  CA  TRP A  39       1.159  -3.682  -0.490  1.00  0.00           C  
ATOM    589  C   TRP A  39       0.552  -5.081  -0.464  1.00  0.00           C  
ATOM    590  O   TRP A  39       0.312  -5.675  -1.487  1.00  0.00           O  
ATOM    591  CB  TRP A  39       0.331  -2.746  -1.369  1.00  0.00           C  
ATOM    592  CG  TRP A  39       1.043  -1.446  -1.538  1.00  0.00           C  
ATOM    593  CD1 TRP A  39       2.042  -1.228  -2.409  1.00  0.00           C  
ATOM    594  CD2 TRP A  39       0.825  -0.192  -0.843  1.00  0.00           C  
ATOM    595  CE2 TRP A  39       1.746   0.765  -1.329  1.00  0.00           C  
ATOM    596  CE3 TRP A  39      -0.073   0.196   0.155  1.00  0.00           C  
ATOM    597  NE1 TRP A  39       2.471   0.083  -2.284  1.00  0.00           N  
ATOM    598  CZ2 TRP A  39       1.775   2.070  -0.834  1.00  0.00           C  
ATOM    599  CZ3 TRP A  39      -0.053   1.508   0.659  1.00  0.00           C  
ATOM    600  CH2 TRP A  39       0.871   2.444   0.165  1.00  0.00           C  
ATOM    601  H   TRP A  39       2.604  -3.591  -2.092  1.00  0.00           H  
ATOM    602  HA  TRP A  39       1.236  -3.282   0.504  1.00  0.00           H  
ATOM    603  HB2 TRP A  39       0.186  -3.196  -2.323  1.00  0.00           H  
ATOM    604  HB3 TRP A  39      -0.621  -2.574  -0.911  1.00  0.00           H  
ATOM    605  HD1 TRP A  39       2.438  -1.960  -3.084  1.00  0.00           H  
ATOM    606  HE1 TRP A  39       3.195   0.495  -2.801  1.00  0.00           H  
ATOM    607  HE3 TRP A  39      -0.785  -0.524   0.533  1.00  0.00           H  
ATOM    608  HZ2 TRP A  39       2.491   2.786  -1.218  1.00  0.00           H  
ATOM    609  HZ3 TRP A  39      -0.751   1.798   1.431  1.00  0.00           H  
ATOM    610  HH2 TRP A  39       0.884   3.451   0.554  1.00  0.00           H  
ATOM    611  N   LEU A  40       0.328  -5.625   0.700  1.00  0.00           N  
ATOM    612  CA  LEU A  40      -0.247  -7.001   0.774  1.00  0.00           C  
ATOM    613  C   LEU A  40      -0.996  -7.214   2.089  1.00  0.00           C  
ATOM    614  O   LEU A  40      -0.612  -6.708   3.126  1.00  0.00           O  
ATOM    615  CB  LEU A  40       0.950  -7.939   0.683  1.00  0.00           C  
ATOM    616  CG  LEU A  40       1.914  -7.644   1.825  1.00  0.00           C  
ATOM    617  CD1 LEU A  40       2.295  -8.953   2.514  1.00  0.00           C  
ATOM    618  CD2 LEU A  40       3.162  -6.965   1.264  1.00  0.00           C  
ATOM    619  H   LEU A  40       0.539  -5.131   1.522  1.00  0.00           H  
ATOM    620  HA  LEU A  40      -0.903  -7.177  -0.057  1.00  0.00           H  
ATOM    621  HB2 LEU A  40       0.611  -8.963   0.751  1.00  0.00           H  
ATOM    622  HB3 LEU A  40       1.455  -7.789  -0.260  1.00  0.00           H  
ATOM    623  HG  LEU A  40       1.438  -6.989   2.538  1.00  0.00           H  
ATOM    624 HD11 LEU A  40       1.402  -9.438   2.881  1.00  0.00           H  
ATOM    625 HD12 LEU A  40       2.790  -9.601   1.806  1.00  0.00           H  
ATOM    626 HD13 LEU A  40       2.958  -8.746   3.340  1.00  0.00           H  
ATOM    627 HD21 LEU A  40       2.981  -6.666   0.242  1.00  0.00           H  
ATOM    628 HD22 LEU A  40       3.390  -6.094   1.858  1.00  0.00           H  
ATOM    629 HD23 LEU A  40       3.994  -7.652   1.297  1.00  0.00           H  
ATOM    630  N   ARG A  41      -2.051  -7.974   2.063  1.00  0.00           N  
ATOM    631  CA  ARG A  41      -2.798  -8.234   3.320  1.00  0.00           C  
ATOM    632  C   ARG A  41      -3.703  -9.458   3.154  1.00  0.00           C  
ATOM    633  O   ARG A  41      -3.888 -10.238   4.066  1.00  0.00           O  
ATOM    634  CB  ARG A  41      -3.616  -6.971   3.568  1.00  0.00           C  
ATOM    635  CG  ARG A  41      -4.594  -7.204   4.722  1.00  0.00           C  
ATOM    636  CD  ARG A  41      -3.825  -7.502   6.014  1.00  0.00           C  
ATOM    637  NE  ARG A  41      -4.790  -8.247   6.869  1.00  0.00           N  
ATOM    638  CZ  ARG A  41      -4.364  -9.184   7.673  1.00  0.00           C  
ATOM    639  NH1 ARG A  41      -4.034 -10.352   7.194  1.00  0.00           N1+
ATOM    640  NH2 ARG A  41      -4.265  -8.952   8.953  1.00  0.00           N  
ATOM    641  H   ARG A  41      -2.342  -8.387   1.223  1.00  0.00           H  
ATOM    642  HA  ARG A  41      -2.108  -8.384   4.127  1.00  0.00           H  
ATOM    643  HB2 ARG A  41      -2.951  -6.157   3.819  1.00  0.00           H  
ATOM    644  HB3 ARG A  41      -4.169  -6.720   2.676  1.00  0.00           H  
ATOM    645  HG2 ARG A  41      -5.194  -6.321   4.861  1.00  0.00           H  
ATOM    646  HG3 ARG A  41      -5.231  -8.042   4.484  1.00  0.00           H  
ATOM    647  HD2 ARG A  41      -2.958  -8.111   5.805  1.00  0.00           H  
ATOM    648  HD3 ARG A  41      -3.534  -6.584   6.499  1.00  0.00           H  
ATOM    649  HE  ARG A  41      -5.746  -8.036   6.827  1.00  0.00           H  
ATOM    650 HH11 ARG A  41      -4.107 -10.527   6.213  1.00  0.00           H  
ATOM    651 HH12 ARG A  41      -3.710 -11.071   7.809  1.00  0.00           H  
ATOM    652 HH21 ARG A  41      -4.514  -8.056   9.320  1.00  0.00           H  
ATOM    653 HH22 ARG A  41      -3.939  -9.671   9.568  1.00  0.00           H  
ATOM    654  N   LYS A  42      -4.274  -9.616   1.992  1.00  0.00           N  
ATOM    655  CA  LYS A  42      -5.186 -10.778   1.737  1.00  0.00           C  
ATOM    656  C   LYS A  42      -5.796 -10.688   0.331  1.00  0.00           C  
ATOM    657  O   LYS A  42      -6.166 -11.687  -0.255  1.00  0.00           O  
ATOM    658  CB  LYS A  42      -6.291 -10.673   2.794  1.00  0.00           C  
ATOM    659  CG  LYS A  42      -6.347 -11.968   3.605  1.00  0.00           C  
ATOM    660  CD  LYS A  42      -7.667 -12.032   4.376  1.00  0.00           C  
ATOM    661  CE  LYS A  42      -7.750 -10.852   5.346  1.00  0.00           C  
ATOM    662  NZ  LYS A  42      -8.790  -9.954   4.770  1.00  0.00           N1+
ATOM    663  H   LYS A  42      -4.103  -8.967   1.285  1.00  0.00           H  
ATOM    664  HA  LYS A  42      -4.652 -11.707   1.857  1.00  0.00           H  
ATOM    665  HB2 LYS A  42      -6.083  -9.842   3.452  1.00  0.00           H  
ATOM    666  HB3 LYS A  42      -7.241 -10.515   2.305  1.00  0.00           H  
ATOM    667  HG2 LYS A  42      -6.278 -12.814   2.937  1.00  0.00           H  
ATOM    668  HG3 LYS A  42      -5.523 -11.992   4.303  1.00  0.00           H  
ATOM    669  HD2 LYS A  42      -8.492 -11.987   3.680  1.00  0.00           H  
ATOM    670  HD3 LYS A  42      -7.715 -12.956   4.932  1.00  0.00           H  
ATOM    671  HE2 LYS A  42      -8.047 -11.195   6.328  1.00  0.00           H  
ATOM    672  HE3 LYS A  42      -6.803 -10.337   5.396  1.00  0.00           H  
ATOM    673  HZ1 LYS A  42      -9.684 -10.475   4.675  1.00  0.00           H  
ATOM    674  HZ2 LYS A  42      -8.931  -9.139   5.399  1.00  0.00           H  
ATOM    675  HZ3 LYS A  42      -8.480  -9.622   3.834  1.00  0.00           H  
ATOM    676  N   GLY A  43      -5.921  -9.503  -0.213  1.00  0.00           N  
ATOM    677  CA  GLY A  43      -6.522  -9.359  -1.569  1.00  0.00           C  
ATOM    678  C   GLY A  43      -5.461  -9.563  -2.660  1.00  0.00           C  
ATOM    679  O   GLY A  43      -5.416  -8.838  -3.635  1.00  0.00           O  
ATOM    680  H   GLY A  43      -5.637  -8.708   0.275  1.00  0.00           H  
ATOM    681  HA2 GLY A  43      -7.302 -10.092  -1.687  1.00  0.00           H  
ATOM    682  HA3 GLY A  43      -6.944  -8.370  -1.668  1.00  0.00           H  
ATOM    683  N   GLN A  44      -4.612 -10.551  -2.516  1.00  0.00           N  
ATOM    684  CA  GLN A  44      -3.560 -10.814  -3.550  1.00  0.00           C  
ATOM    685  C   GLN A  44      -2.546  -9.670  -3.589  1.00  0.00           C  
ATOM    686  O   GLN A  44      -2.522  -8.881  -4.513  1.00  0.00           O  
ATOM    687  CB  GLN A  44      -4.299 -10.929  -4.889  1.00  0.00           C  
ATOM    688  CG  GLN A  44      -3.871 -12.216  -5.597  1.00  0.00           C  
ATOM    689  CD  GLN A  44      -3.601 -11.922  -7.073  1.00  0.00           C  
ATOM    690  NE2 GLN A  44      -2.378 -11.984  -7.525  1.00  0.00           N  
ATOM    691  OE1 GLN A  44      -4.512 -11.630  -7.823  1.00  0.00           O  
ATOM    692  H   GLN A  44      -4.665 -11.126  -1.727  1.00  0.00           H  
ATOM    693  HA  GLN A  44      -3.057 -11.743  -3.334  1.00  0.00           H  
ATOM    694  HB2 GLN A  44      -5.365 -10.951  -4.711  1.00  0.00           H  
ATOM    695  HB3 GLN A  44      -4.055 -10.080  -5.510  1.00  0.00           H  
ATOM    696  HG2 GLN A  44      -2.973 -12.599  -5.134  1.00  0.00           H  
ATOM    697  HG3 GLN A  44      -4.659 -12.950  -5.516  1.00  0.00           H  
ATOM    698 HE21 GLN A  44      -1.644 -12.218  -6.919  1.00  0.00           H  
ATOM    699 HE22 GLN A  44      -2.195 -11.799  -8.469  1.00  0.00           H  
ATOM    700  N   VAL A  45      -1.704  -9.600  -2.586  1.00  0.00           N  
ATOM    701  CA  VAL A  45      -0.646  -8.537  -2.501  1.00  0.00           C  
ATOM    702  C   VAL A  45      -1.090  -7.203  -3.114  1.00  0.00           C  
ATOM    703  O   VAL A  45      -0.282  -6.494  -3.665  1.00  0.00           O  
ATOM    704  CB  VAL A  45       0.564  -9.084  -3.263  1.00  0.00           C  
ATOM    705  CG1 VAL A  45       1.182 -10.244  -2.481  1.00  0.00           C  
ATOM    706  CG2 VAL A  45       0.142  -9.571  -4.652  1.00  0.00           C  
ATOM    707  H   VAL A  45      -1.760 -10.270  -1.873  1.00  0.00           H  
ATOM    708  HA  VAL A  45      -0.371  -8.385  -1.470  1.00  0.00           H  
ATOM    709  HB  VAL A  45       1.294  -8.297  -3.366  1.00  0.00           H  
ATOM    710 HG11 VAL A  45       1.352  -9.939  -1.459  1.00  0.00           H  
ATOM    711 HG12 VAL A  45       0.509 -11.088  -2.498  1.00  0.00           H  
ATOM    712 HG13 VAL A  45       2.122 -10.523  -2.935  1.00  0.00           H  
ATOM    713 HG21 VAL A  45      -0.433  -8.801  -5.144  1.00  0.00           H  
ATOM    714 HG22 VAL A  45       1.022  -9.792  -5.238  1.00  0.00           H  
ATOM    715 HG23 VAL A  45      -0.458 -10.463  -4.555  1.00  0.00           H  
ATOM    716  N   LEU A  46      -2.351  -6.861  -3.004  1.00  0.00           N  
ATOM    717  CA  LEU A  46      -2.860  -5.557  -3.564  1.00  0.00           C  
ATOM    718  C   LEU A  46      -2.259  -5.269  -4.952  1.00  0.00           C  
ATOM    719  O   LEU A  46      -2.846  -5.596  -5.957  1.00  0.00           O  
ATOM    720  CB  LEU A  46      -2.422  -4.472  -2.564  1.00  0.00           C  
ATOM    721  CG  LEU A  46      -3.345  -4.445  -1.342  1.00  0.00           C  
ATOM    722  CD1 LEU A  46      -2.983  -5.590  -0.402  1.00  0.00           C  
ATOM    723  CD2 LEU A  46      -3.155  -3.122  -0.597  1.00  0.00           C  
ATOM    724  H   LEU A  46      -2.969  -7.461  -2.542  1.00  0.00           H  
ATOM    725  HA  LEU A  46      -3.935  -5.576  -3.626  1.00  0.00           H  
ATOM    726  HB2 LEU A  46      -1.414  -4.672  -2.243  1.00  0.00           H  
ATOM    727  HB3 LEU A  46      -2.453  -3.509  -3.052  1.00  0.00           H  
ATOM    728  HG  LEU A  46      -4.373  -4.543  -1.658  1.00  0.00           H  
ATOM    729 HD11 LEU A  46      -2.223  -6.195  -0.860  1.00  0.00           H  
ATOM    730 HD12 LEU A  46      -2.610  -5.189   0.531  1.00  0.00           H  
ATOM    731 HD13 LEU A  46      -3.857  -6.191  -0.211  1.00  0.00           H  
ATOM    732 HD21 LEU A  46      -2.684  -2.404  -1.252  1.00  0.00           H  
ATOM    733 HD22 LEU A  46      -4.115  -2.746  -0.278  1.00  0.00           H  
ATOM    734 HD23 LEU A  46      -2.527  -3.285   0.268  1.00  0.00           H  
ATOM    735  N   SER A  47      -1.092  -4.651  -4.979  1.00  0.00           N  
ATOM    736  CA  SER A  47      -0.362  -4.290  -6.244  1.00  0.00           C  
ATOM    737  C   SER A  47      -0.991  -4.839  -7.527  1.00  0.00           C  
ATOM    738  O   SER A  47      -0.678  -5.930  -7.960  1.00  0.00           O  
ATOM    739  CB  SER A  47       1.034  -4.880  -6.055  1.00  0.00           C  
ATOM    740  OG  SER A  47       1.428  -4.725  -4.698  1.00  0.00           O  
ATOM    741  H   SER A  47      -0.674  -4.413  -4.129  1.00  0.00           H  
ATOM    742  HA  SER A  47      -0.281  -3.226  -6.317  1.00  0.00           H  
ATOM    743  HB2 SER A  47       1.020  -5.928  -6.304  1.00  0.00           H  
ATOM    744  HB3 SER A  47       1.731  -4.367  -6.705  1.00  0.00           H  
ATOM    745  HG  SER A  47       2.215  -4.175  -4.679  1.00  0.00           H  
ATOM    746  N   THR A  48      -1.834  -4.044  -8.148  1.00  0.00           N  
ATOM    747  CA  THR A  48      -2.493  -4.413  -9.448  1.00  0.00           C  
ATOM    748  C   THR A  48      -2.628  -5.929  -9.632  1.00  0.00           C  
ATOM    749  O   THR A  48      -2.204  -6.486 -10.625  1.00  0.00           O  
ATOM    750  CB  THR A  48      -1.580  -3.821 -10.530  1.00  0.00           C  
ATOM    751  CG2 THR A  48      -1.045  -2.448 -10.094  1.00  0.00           C  
ATOM    752  OG1 THR A  48      -0.490  -4.702 -10.760  1.00  0.00           O  
ATOM    753  H   THR A  48      -2.011  -3.160  -7.773  1.00  0.00           H  
ATOM    754  HA  THR A  48      -3.464  -3.950  -9.511  1.00  0.00           H  
ATOM    755  HB  THR A  48      -2.144  -3.704 -11.436  1.00  0.00           H  
ATOM    756  HG1 THR A  48       0.041  -4.731  -9.960  1.00  0.00           H  
ATOM    757 HG21 THR A  48      -1.873  -1.792  -9.879  1.00  0.00           H  
ATOM    758 HG22 THR A  48      -0.440  -2.565  -9.206  1.00  0.00           H  
ATOM    759 HG23 THR A  48      -0.446  -2.026 -10.885  1.00  0.00           H  
ATOM    760  N   SER A  49      -3.211  -6.594  -8.681  1.00  0.00           N  
ATOM    761  CA  SER A  49      -3.371  -8.071  -8.793  1.00  0.00           C  
ATOM    762  C   SER A  49      -4.581  -8.404  -9.666  1.00  0.00           C  
ATOM    763  O   SER A  49      -4.653  -9.459 -10.264  1.00  0.00           O  
ATOM    764  CB  SER A  49      -3.591  -8.559  -7.362  1.00  0.00           C  
ATOM    765  OG  SER A  49      -4.489  -7.682  -6.696  1.00  0.00           O  
ATOM    766  H   SER A  49      -3.541  -6.124  -7.893  1.00  0.00           H  
ATOM    767  HA  SER A  49      -2.478  -8.516  -9.200  1.00  0.00           H  
ATOM    768  HB2 SER A  49      -4.012  -9.548  -7.379  1.00  0.00           H  
ATOM    769  HB3 SER A  49      -2.642  -8.583  -6.841  1.00  0.00           H  
ATOM    770  HG  SER A  49      -5.375  -8.043  -6.781  1.00  0.00           H  
ATOM    771  N   ALA A  50      -5.533  -7.513  -9.746  1.00  0.00           N  
ATOM    772  CA  ALA A  50      -6.736  -7.786 -10.587  1.00  0.00           C  
ATOM    773  C   ALA A  50      -7.686  -6.587 -10.582  1.00  0.00           C  
ATOM    774  O   ALA A  50      -8.351  -6.308 -11.560  1.00  0.00           O  
ATOM    775  CB  ALA A  50      -7.409  -9.002  -9.947  1.00  0.00           C  
ATOM    776  H   ALA A  50      -5.456  -6.668  -9.258  1.00  0.00           H  
ATOM    777  HA  ALA A  50      -6.440  -8.019 -11.592  1.00  0.00           H  
ATOM    778  HB1 ALA A  50      -6.917  -9.237  -9.015  1.00  0.00           H  
ATOM    779  HB2 ALA A  50      -8.449  -8.780  -9.760  1.00  0.00           H  
ATOM    780  HB3 ALA A  50      -7.336  -9.847 -10.616  1.00  0.00           H  
ATOM    781  N   ARG A  51      -7.765  -5.882  -9.491  1.00  0.00           N  
ATOM    782  CA  ARG A  51      -8.689  -4.711  -9.441  1.00  0.00           C  
ATOM    783  C   ARG A  51      -8.079  -3.542  -8.655  1.00  0.00           C  
ATOM    784  O   ARG A  51      -8.728  -2.543  -8.421  1.00  0.00           O  
ATOM    785  CB  ARG A  51      -9.944  -5.232  -8.741  1.00  0.00           C  
ATOM    786  CG  ARG A  51      -9.588  -5.711  -7.332  1.00  0.00           C  
ATOM    787  CD  ARG A  51     -10.576  -6.796  -6.897  1.00  0.00           C  
ATOM    788  NE  ARG A  51      -9.732  -7.987  -6.603  1.00  0.00           N  
ATOM    789  CZ  ARG A  51      -9.885  -9.082  -7.297  1.00  0.00           C  
ATOM    790  NH1 ARG A  51     -11.081  -9.469  -7.650  1.00  0.00           N1+
ATOM    791  NH2 ARG A  51      -8.843  -9.790  -7.638  1.00  0.00           N  
ATOM    792  H   ARG A  51      -7.229  -6.126  -8.712  1.00  0.00           H  
ATOM    793  HA  ARG A  51      -8.939  -4.396 -10.441  1.00  0.00           H  
ATOM    794  HB2 ARG A  51     -10.675  -4.439  -8.679  1.00  0.00           H  
ATOM    795  HB3 ARG A  51     -10.355  -6.056  -9.305  1.00  0.00           H  
ATOM    796  HG2 ARG A  51      -8.586  -6.115  -7.331  1.00  0.00           H  
ATOM    797  HG3 ARG A  51      -9.642  -4.881  -6.644  1.00  0.00           H  
ATOM    798  HD2 ARG A  51     -11.110  -6.482  -6.010  1.00  0.00           H  
ATOM    799  HD3 ARG A  51     -11.266  -7.019  -7.695  1.00  0.00           H  
ATOM    800  HE  ARG A  51      -9.062  -7.949  -5.890  1.00  0.00           H  
ATOM    801 HH11 ARG A  51     -11.879  -8.927  -7.388  1.00  0.00           H  
ATOM    802 HH12 ARG A  51     -11.198 -10.308  -8.182  1.00  0.00           H  
ATOM    803 HH21 ARG A  51      -7.927  -9.492  -7.368  1.00  0.00           H  
ATOM    804 HH22 ARG A  51      -8.960 -10.629  -8.169  1.00  0.00           H  
ATOM    805  N   HIS A  52      -6.846  -3.650  -8.240  1.00  0.00           N  
ATOM    806  CA  HIS A  52      -6.218  -2.541  -7.473  1.00  0.00           C  
ATOM    807  C   HIS A  52      -5.213  -1.806  -8.369  1.00  0.00           C  
ATOM    808  O   HIS A  52      -4.861  -2.280  -9.430  1.00  0.00           O  
ATOM    809  CB  HIS A  52      -5.476  -3.207  -6.305  1.00  0.00           C  
ATOM    810  CG  HIS A  52      -6.188  -4.452  -5.821  1.00  0.00           C  
ATOM    811  CD2 HIS A  52      -6.279  -5.717  -6.347  1.00  0.00           C  
ATOM    812  ND1 HIS A  52      -6.911  -4.483  -4.638  1.00  0.00           N  
ATOM    813  CE1 HIS A  52      -7.397  -5.729  -4.493  1.00  0.00           C  
ATOM    814  NE2 HIS A  52      -7.042  -6.522  -5.507  1.00  0.00           N  
ATOM    815  H   HIS A  52      -6.331  -4.456  -8.421  1.00  0.00           H  
ATOM    816  HA  HIS A  52      -6.968  -1.861  -7.097  1.00  0.00           H  
ATOM    817  HB2 HIS A  52      -4.481  -3.471  -6.623  1.00  0.00           H  
ATOM    818  HB3 HIS A  52      -5.413  -2.506  -5.502  1.00  0.00           H  
ATOM    819  HD1 HIS A  52      -7.046  -3.734  -4.022  1.00  0.00           H  
ATOM    820  HD2 HIS A  52      -5.828  -6.039  -7.274  1.00  0.00           H  
ATOM    821  HE1 HIS A  52      -7.996  -6.051  -3.654  1.00  0.00           H  
ATOM    822  N   GLN A  53      -4.737  -0.661  -7.954  1.00  0.00           N  
ATOM    823  CA  GLN A  53      -3.748   0.074  -8.791  1.00  0.00           C  
ATOM    824  C   GLN A  53      -2.659   0.677  -7.902  1.00  0.00           C  
ATOM    825  O   GLN A  53      -2.837   1.727  -7.321  1.00  0.00           O  
ATOM    826  CB  GLN A  53      -4.549   1.179  -9.481  1.00  0.00           C  
ATOM    827  CG  GLN A  53      -4.120   1.289 -10.948  1.00  0.00           C  
ATOM    828  CD  GLN A  53      -2.609   1.535 -11.033  1.00  0.00           C  
ATOM    829  NE2 GLN A  53      -2.020   2.246 -10.110  1.00  0.00           N  
ATOM    830  OE1 GLN A  53      -1.959   1.074 -11.950  1.00  0.00           O  
ATOM    831  H   GLN A  53      -5.022  -0.287  -7.093  1.00  0.00           H  
ATOM    832  HA  GLN A  53      -3.316  -0.582  -9.527  1.00  0.00           H  
ATOM    833  HB2 GLN A  53      -5.602   0.944  -9.431  1.00  0.00           H  
ATOM    834  HB3 GLN A  53      -4.366   2.119  -8.984  1.00  0.00           H  
ATOM    835  HG2 GLN A  53      -4.363   0.370 -11.462  1.00  0.00           H  
ATOM    836  HG3 GLN A  53      -4.642   2.110 -11.414  1.00  0.00           H  
ATOM    837 HE21 GLN A  53      -2.542   2.618  -9.369  1.00  0.00           H  
ATOM    838 HE22 GLN A  53      -1.054   2.407 -10.158  1.00  0.00           H  
ATOM    839  N   VAL A  54      -1.533   0.026  -7.781  1.00  0.00           N  
ATOM    840  CA  VAL A  54      -0.454   0.589  -6.919  1.00  0.00           C  
ATOM    841  C   VAL A  54       0.706   1.100  -7.782  1.00  0.00           C  
ATOM    842  O   VAL A  54       0.829   0.775  -8.946  1.00  0.00           O  
ATOM    843  CB  VAL A  54      -0.022  -0.570  -5.984  1.00  0.00           C  
ATOM    844  CG1 VAL A  54       1.406  -1.062  -6.286  1.00  0.00           C  
ATOM    845  CG2 VAL A  54      -0.070  -0.084  -4.539  1.00  0.00           C  
ATOM    846  H   VAL A  54      -1.399  -0.823  -8.251  1.00  0.00           H  
ATOM    847  HA  VAL A  54      -0.854   1.397  -6.325  1.00  0.00           H  
ATOM    848  HB  VAL A  54      -0.710  -1.388  -6.101  1.00  0.00           H  
ATOM    849 HG11 VAL A  54       2.091  -0.226  -6.231  1.00  0.00           H  
ATOM    850 HG12 VAL A  54       1.692  -1.807  -5.560  1.00  0.00           H  
ATOM    851 HG13 VAL A  54       1.440  -1.489  -7.276  1.00  0.00           H  
ATOM    852 HG21 VAL A  54      -0.580   0.862  -4.495  1.00  0.00           H  
ATOM    853 HG22 VAL A  54      -0.597  -0.805  -3.934  1.00  0.00           H  
ATOM    854 HG23 VAL A  54       0.935   0.033  -4.166  1.00  0.00           H  
ATOM    855  N   THR A  55       1.564   1.877  -7.194  1.00  0.00           N  
ATOM    856  CA  THR A  55       2.744   2.404  -7.937  1.00  0.00           C  
ATOM    857  C   THR A  55       3.886   2.645  -6.949  1.00  0.00           C  
ATOM    858  O   THR A  55       3.663   2.780  -5.765  1.00  0.00           O  
ATOM    859  CB  THR A  55       2.280   3.717  -8.578  1.00  0.00           C  
ATOM    860  CG2 THR A  55       1.563   4.580  -7.540  1.00  0.00           C  
ATOM    861  OG1 THR A  55       3.408   4.418  -9.081  1.00  0.00           O  
ATOM    862  H   THR A  55       1.444   2.101  -6.252  1.00  0.00           H  
ATOM    863  HA  THR A  55       3.049   1.706  -8.701  1.00  0.00           H  
ATOM    864  HB  THR A  55       1.601   3.500  -9.388  1.00  0.00           H  
ATOM    865  HG1 THR A  55       3.137   5.320  -9.269  1.00  0.00           H  
ATOM    866 HG21 THR A  55       1.830   4.245  -6.548  1.00  0.00           H  
ATOM    867 HG22 THR A  55       1.859   5.612  -7.662  1.00  0.00           H  
ATOM    868 HG23 THR A  55       0.495   4.493  -7.674  1.00  0.00           H  
ATOM    869  N   THR A  56       5.102   2.694  -7.411  1.00  0.00           N  
ATOM    870  CA  THR A  56       6.237   2.921  -6.468  1.00  0.00           C  
ATOM    871  C   THR A  56       7.206   3.957  -7.039  1.00  0.00           C  
ATOM    872  O   THR A  56       7.457   4.000  -8.227  1.00  0.00           O  
ATOM    873  CB  THR A  56       6.923   1.560  -6.341  1.00  0.00           C  
ATOM    874  CG2 THR A  56       5.903   0.510  -5.898  1.00  0.00           C  
ATOM    875  OG1 THR A  56       7.474   1.189  -7.597  1.00  0.00           O  
ATOM    876  H   THR A  56       5.272   2.579  -8.369  1.00  0.00           H  
ATOM    877  HA  THR A  56       5.867   3.238  -5.503  1.00  0.00           H  
ATOM    878  HB  THR A  56       7.711   1.622  -5.607  1.00  0.00           H  
ATOM    879  HG1 THR A  56       6.842   1.423  -8.281  1.00  0.00           H  
ATOM    880 HG21 THR A  56       5.190   0.962  -5.224  1.00  0.00           H  
ATOM    881 HG22 THR A  56       5.385   0.123  -6.763  1.00  0.00           H  
ATOM    882 HG23 THR A  56       6.413  -0.297  -5.393  1.00  0.00           H  
ATOM    883  N   THR A  57       7.755   4.793  -6.201  1.00  0.00           N  
ATOM    884  CA  THR A  57       8.711   5.824  -6.696  1.00  0.00           C  
ATOM    885  C   THR A  57      10.107   5.554  -6.126  1.00  0.00           C  
ATOM    886  O   THR A  57      10.474   4.424  -5.872  1.00  0.00           O  
ATOM    887  CB  THR A  57       8.166   7.159  -6.177  1.00  0.00           C  
ATOM    888  CG2 THR A  57       8.522   8.274  -7.161  1.00  0.00           C  
ATOM    889  OG1 THR A  57       6.753   7.079  -6.041  1.00  0.00           O  
ATOM    890  H   THR A  57       7.541   4.742  -5.246  1.00  0.00           H  
ATOM    891  HA  THR A  57       8.737   5.829  -7.774  1.00  0.00           H  
ATOM    892  HB  THR A  57       8.608   7.378  -5.219  1.00  0.00           H  
ATOM    893  HG1 THR A  57       6.467   7.810  -5.489  1.00  0.00           H  
ATOM    894 HG21 THR A  57       9.400   7.992  -7.724  1.00  0.00           H  
ATOM    895 HG22 THR A  57       7.696   8.434  -7.839  1.00  0.00           H  
ATOM    896 HG23 THR A  57       8.721   9.185  -6.616  1.00  0.00           H  
ATOM    897  N   LYS A  58      10.888   6.579  -5.920  1.00  0.00           N  
ATOM    898  CA  LYS A  58      12.256   6.372  -5.364  1.00  0.00           C  
ATOM    899  C   LYS A  58      12.165   5.923  -3.903  1.00  0.00           C  
ATOM    900  O   LYS A  58      12.477   4.797  -3.568  1.00  0.00           O  
ATOM    901  CB  LYS A  58      12.935   7.738  -5.465  1.00  0.00           C  
ATOM    902  CG  LYS A  58      12.936   8.199  -6.923  1.00  0.00           C  
ATOM    903  CD  LYS A  58      12.627   9.696  -6.987  1.00  0.00           C  
ATOM    904  CE  LYS A  58      13.893  10.494  -6.665  1.00  0.00           C  
ATOM    905  NZ  LYS A  58      14.177  11.278  -7.899  1.00  0.00           N1+
ATOM    906  H   LYS A  58      10.576   7.484  -6.129  1.00  0.00           H  
ATOM    907  HA  LYS A  58      12.796   5.646  -5.950  1.00  0.00           H  
ATOM    908  HB2 LYS A  58      12.397   8.454  -4.861  1.00  0.00           H  
ATOM    909  HB3 LYS A  58      13.953   7.662  -5.113  1.00  0.00           H  
ATOM    910  HG2 LYS A  58      13.907   8.012  -7.358  1.00  0.00           H  
ATOM    911  HG3 LYS A  58      12.183   7.655  -7.472  1.00  0.00           H  
ATOM    912  HD2 LYS A  58      12.283   9.950  -7.979  1.00  0.00           H  
ATOM    913  HD3 LYS A  58      11.860   9.937  -6.266  1.00  0.00           H  
ATOM    914  HE2 LYS A  58      13.716  11.155  -5.828  1.00  0.00           H  
ATOM    915  HE3 LYS A  58      14.715   9.827  -6.454  1.00  0.00           H  
ATOM    916  HZ1 LYS A  58      14.136  10.650  -8.727  1.00  0.00           H  
ATOM    917  HZ2 LYS A  58      13.467  12.033  -8.001  1.00  0.00           H  
ATOM    918  HZ3 LYS A  58      15.125  11.699  -7.833  1.00  0.00           H  
ATOM    919  N   TYR A  59      11.740   6.796  -3.033  1.00  0.00           N  
ATOM    920  CA  TYR A  59      11.626   6.426  -1.594  1.00  0.00           C  
ATOM    921  C   TYR A  59      10.203   6.659  -1.106  1.00  0.00           C  
ATOM    922  O   TYR A  59       9.965   6.895   0.059  1.00  0.00           O  
ATOM    923  CB  TYR A  59      12.573   7.365  -0.866  1.00  0.00           C  
ATOM    924  CG  TYR A  59      13.958   7.259  -1.453  1.00  0.00           C  
ATOM    925  CD1 TYR A  59      14.255   7.898  -2.662  1.00  0.00           C  
ATOM    926  CD2 TYR A  59      14.945   6.522  -0.789  1.00  0.00           C  
ATOM    927  CE1 TYR A  59      15.538   7.802  -3.208  1.00  0.00           C  
ATOM    928  CE2 TYR A  59      16.228   6.426  -1.334  1.00  0.00           C  
ATOM    929  CZ  TYR A  59      16.527   7.065  -2.544  1.00  0.00           C  
ATOM    930  OH  TYR A  59      17.796   6.970  -3.081  1.00  0.00           O  
ATOM    931  H   TYR A  59      11.494   7.697  -3.324  1.00  0.00           H  
ATOM    932  HA  TYR A  59      11.921   5.405  -1.437  1.00  0.00           H  
ATOM    933  HB2 TYR A  59      12.212   8.376  -0.967  1.00  0.00           H  
ATOM    934  HB3 TYR A  59      12.600   7.098   0.174  1.00  0.00           H  
ATOM    935  HD1 TYR A  59      13.493   8.465  -3.173  1.00  0.00           H  
ATOM    936  HD2 TYR A  59      14.716   6.029   0.144  1.00  0.00           H  
ATOM    937  HE1 TYR A  59      15.764   8.295  -4.141  1.00  0.00           H  
ATOM    938  HE2 TYR A  59      16.988   5.857  -0.822  1.00  0.00           H  
ATOM    939  HH  TYR A  59      18.243   6.237  -2.654  1.00  0.00           H  
ATOM    940  N   LYS A  60       9.261   6.617  -1.992  1.00  0.00           N  
ATOM    941  CA  LYS A  60       7.847   6.854  -1.584  1.00  0.00           C  
ATOM    942  C   LYS A  60       6.896   6.097  -2.511  1.00  0.00           C  
ATOM    943  O   LYS A  60       6.931   6.251  -3.715  1.00  0.00           O  
ATOM    944  CB  LYS A  60       7.614   8.377  -1.684  1.00  0.00           C  
ATOM    945  CG  LYS A  60       8.485   9.006  -2.786  1.00  0.00           C  
ATOM    946  CD  LYS A  60       7.697  10.110  -3.494  1.00  0.00           C  
ATOM    947  CE  LYS A  60       7.334  11.205  -2.487  1.00  0.00           C  
ATOM    948  NZ  LYS A  60       6.597  12.227  -3.281  1.00  0.00           N1+
ATOM    949  H   LYS A  60       9.481   6.441  -2.928  1.00  0.00           H  
ATOM    950  HA  LYS A  60       7.700   6.533  -0.565  1.00  0.00           H  
ATOM    951  HB2 LYS A  60       6.574   8.561  -1.908  1.00  0.00           H  
ATOM    952  HB3 LYS A  60       7.857   8.835  -0.736  1.00  0.00           H  
ATOM    953  HG2 LYS A  60       9.378   9.426  -2.343  1.00  0.00           H  
ATOM    954  HG3 LYS A  60       8.764   8.249  -3.503  1.00  0.00           H  
ATOM    955  HD2 LYS A  60       8.300  10.532  -4.285  1.00  0.00           H  
ATOM    956  HD3 LYS A  60       6.792   9.695  -3.912  1.00  0.00           H  
ATOM    957  HE2 LYS A  60       6.703  10.802  -1.707  1.00  0.00           H  
ATOM    958  HE3 LYS A  60       8.227  11.638  -2.065  1.00  0.00           H  
ATOM    959  HZ1 LYS A  60       7.162  12.492  -4.114  1.00  0.00           H  
ATOM    960  HZ2 LYS A  60       5.686  11.835  -3.591  1.00  0.00           H  
ATOM    961  HZ3 LYS A  60       6.429  13.067  -2.694  1.00  0.00           H  
ATOM    962  N   SER A  61       6.037   5.287  -1.958  1.00  0.00           N  
ATOM    963  CA  SER A  61       5.078   4.534  -2.807  1.00  0.00           C  
ATOM    964  C   SER A  61       3.698   5.164  -2.713  1.00  0.00           C  
ATOM    965  O   SER A  61       3.462   6.052  -1.923  1.00  0.00           O  
ATOM    966  CB  SER A  61       5.038   3.117  -2.242  1.00  0.00           C  
ATOM    967  OG  SER A  61       4.550   2.247  -3.245  1.00  0.00           O  
ATOM    968  H   SER A  61       6.015   5.183  -0.988  1.00  0.00           H  
ATOM    969  HA  SER A  61       5.410   4.516  -3.831  1.00  0.00           H  
ATOM    970  HB2 SER A  61       6.022   2.802  -1.944  1.00  0.00           H  
ATOM    971  HB3 SER A  61       4.383   3.093  -1.386  1.00  0.00           H  
ATOM    972  HG  SER A  61       3.601   2.341  -3.275  1.00  0.00           H  
ATOM    973  N   THR A  62       2.785   4.708  -3.510  1.00  0.00           N  
ATOM    974  CA  THR A  62       1.417   5.273  -3.465  1.00  0.00           C  
ATOM    975  C   THR A  62       0.414   4.215  -3.906  1.00  0.00           C  
ATOM    976  O   THR A  62       0.624   3.510  -4.876  1.00  0.00           O  
ATOM    977  CB  THR A  62       1.452   6.454  -4.431  1.00  0.00           C  
ATOM    978  CG2 THR A  62       2.026   7.669  -3.712  1.00  0.00           C  
ATOM    979  OG1 THR A  62       2.277   6.133  -5.540  1.00  0.00           O  
ATOM    980  H   THR A  62       2.996   3.987  -4.136  1.00  0.00           H  
ATOM    981  HA  THR A  62       1.186   5.614  -2.466  1.00  0.00           H  
ATOM    982  HB  THR A  62       0.453   6.677  -4.771  1.00  0.00           H  
ATOM    983  HG1 THR A  62       3.194   6.233  -5.272  1.00  0.00           H  
ATOM    984 HG21 THR A  62       1.503   7.811  -2.780  1.00  0.00           H  
ATOM    985 HG22 THR A  62       3.075   7.504  -3.515  1.00  0.00           H  
ATOM    986 HG23 THR A  62       1.907   8.543  -4.332  1.00  0.00           H  
ATOM    987  N   PHE A  63      -0.665   4.083  -3.193  1.00  0.00           N  
ATOM    988  CA  PHE A  63      -1.666   3.055  -3.566  1.00  0.00           C  
ATOM    989  C   PHE A  63      -3.050   3.676  -3.735  1.00  0.00           C  
ATOM    990  O   PHE A  63      -3.556   4.335  -2.856  1.00  0.00           O  
ATOM    991  CB  PHE A  63      -1.654   2.067  -2.398  1.00  0.00           C  
ATOM    992  CG  PHE A  63      -2.730   1.022  -2.584  1.00  0.00           C  
ATOM    993  CD1 PHE A  63      -3.024   0.532  -3.863  1.00  0.00           C  
ATOM    994  CD2 PHE A  63      -3.424   0.533  -1.472  1.00  0.00           C  
ATOM    995  CE1 PHE A  63      -4.008  -0.445  -4.030  1.00  0.00           C  
ATOM    996  CE2 PHE A  63      -4.412  -0.443  -1.639  1.00  0.00           C  
ATOM    997  CZ  PHE A  63      -4.703  -0.934  -2.918  1.00  0.00           C  
ATOM    998  H   PHE A  63      -0.808   4.648  -2.407  1.00  0.00           H  
ATOM    999  HA  PHE A  63      -1.367   2.560  -4.472  1.00  0.00           H  
ATOM   1000  HB2 PHE A  63      -0.690   1.582  -2.350  1.00  0.00           H  
ATOM   1001  HB3 PHE A  63      -1.831   2.602  -1.476  1.00  0.00           H  
ATOM   1002  HD1 PHE A  63      -2.492   0.914  -4.720  1.00  0.00           H  
ATOM   1003  HD2 PHE A  63      -3.202   0.915  -0.484  1.00  0.00           H  
ATOM   1004  HE1 PHE A  63      -4.231  -0.820  -5.018  1.00  0.00           H  
ATOM   1005  HE2 PHE A  63      -4.946  -0.819  -0.782  1.00  0.00           H  
ATOM   1006  HZ  PHE A  63      -5.464  -1.689  -3.046  1.00  0.00           H  
ATOM   1007  N   GLU A  64      -3.671   3.458  -4.858  1.00  0.00           N  
ATOM   1008  CA  GLU A  64      -5.028   4.028  -5.076  1.00  0.00           C  
ATOM   1009  C   GLU A  64      -5.976   2.935  -5.589  1.00  0.00           C  
ATOM   1010  O   GLU A  64      -5.700   2.280  -6.574  1.00  0.00           O  
ATOM   1011  CB  GLU A  64      -4.833   5.124  -6.133  1.00  0.00           C  
ATOM   1012  CG  GLU A  64      -4.482   4.495  -7.488  1.00  0.00           C  
ATOM   1013  CD  GLU A  64      -5.738   4.439  -8.360  1.00  0.00           C  
ATOM   1014  OE1 GLU A  64      -6.271   5.493  -8.664  1.00  0.00           O  
ATOM   1015  OE2 GLU A  64      -6.148   3.343  -8.708  1.00  0.00           O1-
ATOM   1016  H   GLU A  64      -3.251   2.911  -5.553  1.00  0.00           H  
ATOM   1017  HA  GLU A  64      -5.402   4.462  -4.160  1.00  0.00           H  
ATOM   1018  HB2 GLU A  64      -5.746   5.694  -6.229  1.00  0.00           H  
ATOM   1019  HB3 GLU A  64      -4.032   5.779  -5.825  1.00  0.00           H  
ATOM   1020  HG2 GLU A  64      -3.728   5.091  -7.978  1.00  0.00           H  
ATOM   1021  HG3 GLU A  64      -4.106   3.494  -7.336  1.00  0.00           H  
ATOM   1022  N   ILE A  65      -7.090   2.729  -4.945  1.00  0.00           N  
ATOM   1023  CA  ILE A  65      -8.027   1.673  -5.435  1.00  0.00           C  
ATOM   1024  C   ILE A  65      -9.129   2.312  -6.272  1.00  0.00           C  
ATOM   1025  O   ILE A  65      -9.789   3.243  -5.854  1.00  0.00           O  
ATOM   1026  CB  ILE A  65      -8.626   1.000  -4.203  1.00  0.00           C  
ATOM   1027  CG1 ILE A  65      -7.526   0.733  -3.162  1.00  0.00           C  
ATOM   1028  CG2 ILE A  65      -9.271  -0.323  -4.627  1.00  0.00           C  
ATOM   1029  CD1 ILE A  65      -8.078  -0.119  -2.015  1.00  0.00           C  
ATOM   1030  H   ILE A  65      -7.311   3.263  -4.153  1.00  0.00           H  
ATOM   1031  HA  ILE A  65      -7.490   0.946  -6.024  1.00  0.00           H  
ATOM   1032  HB  ILE A  65      -9.380   1.645  -3.788  1.00  0.00           H  
ATOM   1033 HG12 ILE A  65      -6.710   0.210  -3.635  1.00  0.00           H  
ATOM   1034 HG13 ILE A  65      -7.170   1.673  -2.769  1.00  0.00           H  
ATOM   1035 HG21 ILE A  65      -9.932  -0.150  -5.463  1.00  0.00           H  
ATOM   1036 HG22 ILE A  65      -8.500  -1.023  -4.916  1.00  0.00           H  
ATOM   1037 HG23 ILE A  65      -9.834  -0.730  -3.800  1.00  0.00           H  
ATOM   1038 HD11 ILE A  65      -8.920   0.385  -1.564  1.00  0.00           H  
ATOM   1039 HD12 ILE A  65      -8.395  -1.077  -2.399  1.00  0.00           H  
ATOM   1040 HD13 ILE A  65      -7.306  -0.267  -1.273  1.00  0.00           H  
ATOM   1041  N   SER A  66      -9.322   1.818  -7.454  1.00  0.00           N  
ATOM   1042  CA  SER A  66     -10.377   2.391  -8.344  1.00  0.00           C  
ATOM   1043  C   SER A  66     -10.926   1.330  -9.307  1.00  0.00           C  
ATOM   1044  O   SER A  66     -11.597   1.646 -10.268  1.00  0.00           O  
ATOM   1045  CB  SER A  66      -9.669   3.499  -9.120  1.00  0.00           C  
ATOM   1046  OG  SER A  66      -8.756   4.164  -8.256  1.00  0.00           O  
ATOM   1047  H   SER A  66      -8.769   1.071  -7.755  1.00  0.00           H  
ATOM   1048  HA  SER A  66     -11.175   2.814  -7.755  1.00  0.00           H  
ATOM   1049  HB2 SER A  66      -9.127   3.072  -9.947  1.00  0.00           H  
ATOM   1050  HB3 SER A  66     -10.402   4.200  -9.496  1.00  0.00           H  
ATOM   1051  HG  SER A  66      -9.266   4.664  -7.615  1.00  0.00           H  
ATOM   1052  N   SER A  67     -10.639   0.080  -9.070  1.00  0.00           N  
ATOM   1053  CA  SER A  67     -11.138  -0.987  -9.988  1.00  0.00           C  
ATOM   1054  C   SER A  67     -11.673  -2.194  -9.200  1.00  0.00           C  
ATOM   1055  O   SER A  67     -12.105  -3.173  -9.777  1.00  0.00           O  
ATOM   1056  CB  SER A  67      -9.911  -1.380 -10.791  1.00  0.00           C  
ATOM   1057  OG  SER A  67     -10.049  -2.716 -11.254  1.00  0.00           O  
ATOM   1058  H   SER A  67     -10.087  -0.159  -8.300  1.00  0.00           H  
ATOM   1059  HA  SER A  67     -11.892  -0.597 -10.644  1.00  0.00           H  
ATOM   1060  HB2 SER A  67      -9.801  -0.720 -11.635  1.00  0.00           H  
ATOM   1061  HB3 SER A  67      -9.048  -1.296 -10.155  1.00  0.00           H  
ATOM   1062  HG  SER A  67      -9.992  -2.706 -12.213  1.00  0.00           H  
ATOM   1063  N   VAL A  68     -11.635  -2.131  -7.891  1.00  0.00           N  
ATOM   1064  CA  VAL A  68     -12.127  -3.264  -7.038  1.00  0.00           C  
ATOM   1065  C   VAL A  68     -13.396  -3.904  -7.622  1.00  0.00           C  
ATOM   1066  O   VAL A  68     -14.173  -3.261  -8.300  1.00  0.00           O  
ATOM   1067  CB  VAL A  68     -12.425  -2.617  -5.685  1.00  0.00           C  
ATOM   1068  CG1 VAL A  68     -13.574  -1.617  -5.830  1.00  0.00           C  
ATOM   1069  CG2 VAL A  68     -12.817  -3.697  -4.676  1.00  0.00           C  
ATOM   1070  H   VAL A  68     -11.272  -1.335  -7.460  1.00  0.00           H  
ATOM   1071  HA  VAL A  68     -11.355  -4.006  -6.921  1.00  0.00           H  
ATOM   1072  HB  VAL A  68     -11.544  -2.099  -5.334  1.00  0.00           H  
ATOM   1073 HG11 VAL A  68     -13.949  -1.643  -6.843  1.00  0.00           H  
ATOM   1074 HG12 VAL A  68     -14.368  -1.878  -5.145  1.00  0.00           H  
ATOM   1075 HG13 VAL A  68     -13.216  -0.624  -5.605  1.00  0.00           H  
ATOM   1076 HG21 VAL A  68     -12.599  -4.672  -5.089  1.00  0.00           H  
ATOM   1077 HG22 VAL A  68     -12.253  -3.557  -3.766  1.00  0.00           H  
ATOM   1078 HG23 VAL A  68     -13.872  -3.625  -4.461  1.00  0.00           H  
ATOM   1079  N   GLN A  69     -13.602  -5.170  -7.370  1.00  0.00           N  
ATOM   1080  CA  GLN A  69     -14.811  -5.855  -7.915  1.00  0.00           C  
ATOM   1081  C   GLN A  69     -15.947  -5.839  -6.886  1.00  0.00           C  
ATOM   1082  O   GLN A  69     -16.842  -5.019  -6.951  1.00  0.00           O  
ATOM   1083  CB  GLN A  69     -14.359  -7.290  -8.192  1.00  0.00           C  
ATOM   1084  CG  GLN A  69     -13.837  -7.394  -9.626  1.00  0.00           C  
ATOM   1085  CD  GLN A  69     -14.716  -8.361 -10.423  1.00  0.00           C  
ATOM   1086  NE2 GLN A  69     -14.796  -8.234 -11.719  1.00  0.00           N  
ATOM   1087  OE1 GLN A  69     -15.337  -9.241  -9.860  1.00  0.00           O  
ATOM   1088  H   GLN A  69     -12.959  -5.671  -6.826  1.00  0.00           H  
ATOM   1089  HA  GLN A  69     -15.127  -5.387  -8.833  1.00  0.00           H  
ATOM   1090  HB2 GLN A  69     -13.573  -7.560  -7.502  1.00  0.00           H  
ATOM   1091  HB3 GLN A  69     -15.195  -7.962  -8.066  1.00  0.00           H  
ATOM   1092  HG2 GLN A  69     -13.862  -6.419 -10.090  1.00  0.00           H  
ATOM   1093  HG3 GLN A  69     -12.822  -7.762  -9.614  1.00  0.00           H  
ATOM   1094 HE21 GLN A  69     -14.295  -7.525 -12.174  1.00  0.00           H  
ATOM   1095 HE22 GLN A  69     -15.356  -8.848 -12.238  1.00  0.00           H  
ATOM   1096  N   ALA A  70     -15.921  -6.742  -5.942  1.00  0.00           N  
ATOM   1097  CA  ALA A  70     -17.002  -6.778  -4.914  1.00  0.00           C  
ATOM   1098  C   ALA A  70     -16.617  -7.724  -3.771  1.00  0.00           C  
ATOM   1099  O   ALA A  70     -17.461  -8.343  -3.154  1.00  0.00           O  
ATOM   1100  CB  ALA A  70     -18.233  -7.304  -5.653  1.00  0.00           C  
ATOM   1101  H   ALA A  70     -15.192  -7.396  -5.909  1.00  0.00           H  
ATOM   1102  HA  ALA A  70     -17.195  -5.787  -4.536  1.00  0.00           H  
ATOM   1103  HB1 ALA A  70     -18.019  -7.366  -6.710  1.00  0.00           H  
ATOM   1104  HB2 ALA A  70     -18.486  -8.284  -5.278  1.00  0.00           H  
ATOM   1105  HB3 ALA A  70     -19.063  -6.631  -5.494  1.00  0.00           H  
ATOM   1106  N   SER A  71     -15.350  -7.839  -3.485  1.00  0.00           N  
ATOM   1107  CA  SER A  71     -14.913  -8.743  -2.381  1.00  0.00           C  
ATOM   1108  C   SER A  71     -13.507  -8.361  -1.911  1.00  0.00           C  
ATOM   1109  O   SER A  71     -12.674  -9.207  -1.657  1.00  0.00           O  
ATOM   1110  CB  SER A  71     -14.911 -10.143  -2.992  1.00  0.00           C  
ATOM   1111  OG  SER A  71     -14.591 -11.091  -1.982  1.00  0.00           O  
ATOM   1112  H   SER A  71     -14.684  -7.330  -3.994  1.00  0.00           H  
ATOM   1113  HA  SER A  71     -15.610  -8.700  -1.560  1.00  0.00           H  
ATOM   1114  HB2 SER A  71     -15.886 -10.365  -3.392  1.00  0.00           H  
ATOM   1115  HB3 SER A  71     -14.178 -10.187  -3.787  1.00  0.00           H  
ATOM   1116  HG  SER A  71     -14.796 -11.965  -2.321  1.00  0.00           H  
ATOM   1117  N   ASP A  72     -13.239  -7.091  -1.796  1.00  0.00           N  
ATOM   1118  CA  ASP A  72     -11.889  -6.648  -1.345  1.00  0.00           C  
ATOM   1119  C   ASP A  72     -11.944  -6.170   0.107  1.00  0.00           C  
ATOM   1120  O   ASP A  72     -11.116  -5.394   0.537  1.00  0.00           O  
ATOM   1121  CB  ASP A  72     -11.542  -5.487  -2.259  1.00  0.00           C  
ATOM   1122  CG  ASP A  72     -10.396  -5.868  -3.201  1.00  0.00           C  
ATOM   1123  OD1 ASP A  72     -10.057  -7.038  -3.256  1.00  0.00           O  
ATOM   1124  OD2 ASP A  72      -9.881  -4.978  -3.857  1.00  0.00           O1-
ATOM   1125  H   ASP A  72     -13.927  -6.425  -2.008  1.00  0.00           H  
ATOM   1126  HA  ASP A  72     -11.173  -7.438  -1.461  1.00  0.00           H  
ATOM   1127  HB2 ASP A  72     -12.406  -5.234  -2.838  1.00  0.00           H  
ATOM   1128  HB3 ASP A  72     -11.250  -4.642  -1.659  1.00  0.00           H  
ATOM   1129  N   GLU A  73     -12.922  -6.642   0.846  1.00  0.00           N  
ATOM   1130  CA  GLU A  73     -13.106  -6.264   2.291  1.00  0.00           C  
ATOM   1131  C   GLU A  73     -12.546  -4.866   2.607  1.00  0.00           C  
ATOM   1132  O   GLU A  73     -12.717  -3.945   1.834  1.00  0.00           O  
ATOM   1133  CB  GLU A  73     -12.398  -7.363   3.087  1.00  0.00           C  
ATOM   1134  CG  GLU A  73     -10.988  -7.597   2.543  1.00  0.00           C  
ATOM   1135  CD  GLU A  73     -11.042  -8.613   1.399  1.00  0.00           C  
ATOM   1136  OE1 GLU A  73     -11.906  -9.474   1.439  1.00  0.00           O  
ATOM   1137  OE2 GLU A  73     -10.221  -8.511   0.503  1.00  0.00           O1-
ATOM   1138  H   GLU A  73     -13.550  -7.266   0.441  1.00  0.00           H  
ATOM   1139  HA  GLU A  73     -14.159  -6.283   2.530  1.00  0.00           H  
ATOM   1140  HB2 GLU A  73     -12.344  -7.079   4.124  1.00  0.00           H  
ATOM   1141  HB3 GLU A  73     -12.966  -8.274   3.000  1.00  0.00           H  
ATOM   1142  HG2 GLU A  73     -10.579  -6.666   2.184  1.00  0.00           H  
ATOM   1143  HG3 GLU A  73     -10.364  -7.982   3.329  1.00  0.00           H  
ATOM   1144  N   GLY A  74     -11.903  -4.681   3.734  1.00  0.00           N  
ATOM   1145  CA  GLY A  74     -11.386  -3.340   4.062  1.00  0.00           C  
ATOM   1146  C   GLY A  74      -9.963  -3.385   4.609  1.00  0.00           C  
ATOM   1147  O   GLY A  74      -9.321  -2.391   4.645  1.00  0.00           O  
ATOM   1148  H   GLY A  74     -11.783  -5.402   4.357  1.00  0.00           H  
ATOM   1149  HA2 GLY A  74     -11.388  -2.748   3.175  1.00  0.00           H  
ATOM   1150  HA3 GLY A  74     -12.030  -2.883   4.797  1.00  0.00           H  
ATOM   1151  N   ASN A  75      -9.460  -4.492   5.058  1.00  0.00           N  
ATOM   1152  CA  ASN A  75      -8.069  -4.475   5.618  1.00  0.00           C  
ATOM   1153  C   ASN A  75      -6.995  -4.719   4.540  1.00  0.00           C  
ATOM   1154  O   ASN A  75      -6.995  -5.718   3.848  1.00  0.00           O  
ATOM   1155  CB  ASN A  75      -8.054  -5.588   6.661  1.00  0.00           C  
ATOM   1156  CG  ASN A  75      -6.662  -5.695   7.291  1.00  0.00           C  
ATOM   1157  ND2 ASN A  75      -6.485  -6.477   8.321  1.00  0.00           N  
ATOM   1158  OD1 ASN A  75      -5.726  -5.059   6.848  1.00  0.00           O  
ATOM   1159  H   ASN A  75      -9.985  -5.306   5.062  1.00  0.00           H  
ATOM   1160  HA  ASN A  75      -7.886  -3.532   6.104  1.00  0.00           H  
ATOM   1161  HB2 ASN A  75      -8.778  -5.362   7.429  1.00  0.00           H  
ATOM   1162  HB3 ASN A  75      -8.310  -6.521   6.192  1.00  0.00           H  
ATOM   1163 HD21 ASN A  75      -7.238  -6.988   8.683  1.00  0.00           H  
ATOM   1164 HD22 ASN A  75      -5.599  -6.552   8.731  1.00  0.00           H  
ATOM   1165  N   TYR A  76      -6.066  -3.795   4.430  1.00  0.00           N  
ATOM   1166  CA  TYR A  76      -4.940  -3.910   3.447  1.00  0.00           C  
ATOM   1167  C   TYR A  76      -3.670  -3.320   4.085  1.00  0.00           C  
ATOM   1168  O   TYR A  76      -3.761  -2.450   4.927  1.00  0.00           O  
ATOM   1169  CB  TYR A  76      -5.369  -3.062   2.254  1.00  0.00           C  
ATOM   1170  CG  TYR A  76      -6.243  -3.881   1.345  1.00  0.00           C  
ATOM   1171  CD1 TYR A  76      -5.837  -5.159   0.951  1.00  0.00           C  
ATOM   1172  CD2 TYR A  76      -7.460  -3.360   0.899  1.00  0.00           C  
ATOM   1173  CE1 TYR A  76      -6.653  -5.921   0.106  1.00  0.00           C  
ATOM   1174  CE2 TYR A  76      -8.278  -4.120   0.054  1.00  0.00           C  
ATOM   1175  CZ  TYR A  76      -7.874  -5.401  -0.342  1.00  0.00           C  
ATOM   1176  OH  TYR A  76      -8.679  -6.152  -1.173  1.00  0.00           O  
ATOM   1177  H   TYR A  76      -6.103  -3.014   5.013  1.00  0.00           H  
ATOM   1178  HA  TYR A  76      -4.790  -4.932   3.150  1.00  0.00           H  
ATOM   1179  HB2 TYR A  76      -5.921  -2.202   2.604  1.00  0.00           H  
ATOM   1180  HB3 TYR A  76      -4.495  -2.733   1.711  1.00  0.00           H  
ATOM   1181  HD1 TYR A  76      -4.893  -5.556   1.301  1.00  0.00           H  
ATOM   1182  HD2 TYR A  76      -7.767  -2.371   1.208  1.00  0.00           H  
ATOM   1183  HE1 TYR A  76      -6.343  -6.909  -0.201  1.00  0.00           H  
ATOM   1184  HE2 TYR A  76      -9.221  -3.719  -0.293  1.00  0.00           H  
ATOM   1185  HH  TYR A  76      -9.591  -6.001  -0.915  1.00  0.00           H  
ATOM   1186  N   SER A  77      -2.485  -3.764   3.722  1.00  0.00           N  
ATOM   1187  CA  SER A  77      -1.277  -3.162   4.374  1.00  0.00           C  
ATOM   1188  C   SER A  77      -0.114  -2.984   3.389  1.00  0.00           C  
ATOM   1189  O   SER A  77      -0.245  -3.223   2.206  1.00  0.00           O  
ATOM   1190  CB  SER A  77      -0.877  -4.114   5.503  1.00  0.00           C  
ATOM   1191  OG  SER A  77      -1.802  -5.193   5.589  1.00  0.00           O  
ATOM   1192  H   SER A  77      -2.389  -4.476   3.047  1.00  0.00           H  
ATOM   1193  HA  SER A  77      -1.542  -2.211   4.793  1.00  0.00           H  
ATOM   1194  HB2 SER A  77       0.103  -4.502   5.306  1.00  0.00           H  
ATOM   1195  HB3 SER A  77      -0.860  -3.568   6.437  1.00  0.00           H  
ATOM   1196  HG  SER A  77      -2.664  -4.829   5.807  1.00  0.00           H  
ATOM   1197  N   VAL A  78       1.025  -2.552   3.882  1.00  0.00           N  
ATOM   1198  CA  VAL A  78       2.211  -2.343   2.984  1.00  0.00           C  
ATOM   1199  C   VAL A  78       3.524  -2.570   3.738  1.00  0.00           C  
ATOM   1200  O   VAL A  78       3.934  -1.767   4.548  1.00  0.00           O  
ATOM   1201  CB  VAL A  78       2.125  -0.882   2.539  1.00  0.00           C  
ATOM   1202  CG1 VAL A  78       2.086   0.011   3.775  1.00  0.00           C  
ATOM   1203  CG2 VAL A  78       3.358  -0.514   1.698  1.00  0.00           C  
ATOM   1204  H   VAL A  78       1.097  -2.361   4.843  1.00  0.00           H  
ATOM   1205  HA  VAL A  78       2.155  -2.991   2.128  1.00  0.00           H  
ATOM   1206  HB  VAL A  78       1.229  -0.734   1.958  1.00  0.00           H  
ATOM   1207 HG11 VAL A  78       1.934  -0.599   4.654  1.00  0.00           H  
ATOM   1208 HG12 VAL A  78       3.023   0.542   3.863  1.00  0.00           H  
ATOM   1209 HG13 VAL A  78       1.277   0.718   3.682  1.00  0.00           H  
ATOM   1210 HG21 VAL A  78       3.930  -1.404   1.484  1.00  0.00           H  
ATOM   1211 HG22 VAL A  78       3.042  -0.057   0.771  1.00  0.00           H  
ATOM   1212 HG23 VAL A  78       3.975   0.184   2.248  1.00  0.00           H  
ATOM   1213  N   VAL A  79       4.199  -3.642   3.455  1.00  0.00           N  
ATOM   1214  CA  VAL A  79       5.496  -3.904   4.138  1.00  0.00           C  
ATOM   1215  C   VAL A  79       6.643  -3.272   3.347  1.00  0.00           C  
ATOM   1216  O   VAL A  79       7.088  -3.795   2.344  1.00  0.00           O  
ATOM   1217  CB  VAL A  79       5.650  -5.426   4.178  1.00  0.00           C  
ATOM   1218  CG1 VAL A  79       4.508  -6.039   4.989  1.00  0.00           C  
ATOM   1219  CG2 VAL A  79       5.628  -5.991   2.763  1.00  0.00           C  
ATOM   1220  H   VAL A  79       3.862  -4.262   2.789  1.00  0.00           H  
ATOM   1221  HA  VAL A  79       5.473  -3.510   5.140  1.00  0.00           H  
ATOM   1222  HB  VAL A  79       6.590  -5.674   4.634  1.00  0.00           H  
ATOM   1223 HG11 VAL A  79       3.736  -5.299   5.138  1.00  0.00           H  
ATOM   1224 HG12 VAL A  79       4.099  -6.883   4.454  1.00  0.00           H  
ATOM   1225 HG13 VAL A  79       4.883  -6.367   5.947  1.00  0.00           H  
ATOM   1226 HG21 VAL A  79       5.172  -5.278   2.105  1.00  0.00           H  
ATOM   1227 HG22 VAL A  79       6.639  -6.187   2.438  1.00  0.00           H  
ATOM   1228 HG23 VAL A  79       5.063  -6.910   2.752  1.00  0.00           H  
ATOM   1229  N   VAL A  80       7.124  -2.148   3.798  1.00  0.00           N  
ATOM   1230  CA  VAL A  80       8.242  -1.472   3.089  1.00  0.00           C  
ATOM   1231  C   VAL A  80       9.583  -2.010   3.637  1.00  0.00           C  
ATOM   1232  O   VAL A  80       9.878  -1.887   4.808  1.00  0.00           O  
ATOM   1233  CB  VAL A  80       8.012   0.034   3.381  1.00  0.00           C  
ATOM   1234  CG1 VAL A  80       8.991   0.582   4.430  1.00  0.00           C  
ATOM   1235  CG2 VAL A  80       8.172   0.825   2.084  1.00  0.00           C  
ATOM   1236  H   VAL A  80       6.744  -1.745   4.605  1.00  0.00           H  
ATOM   1237  HA  VAL A  80       8.168  -1.654   2.027  1.00  0.00           H  
ATOM   1238  HB  VAL A  80       7.004   0.165   3.746  1.00  0.00           H  
ATOM   1239 HG11 VAL A  80       8.884   0.024   5.348  1.00  0.00           H  
ATOM   1240 HG12 VAL A  80      10.003   0.483   4.064  1.00  0.00           H  
ATOM   1241 HG13 VAL A  80       8.775   1.624   4.614  1.00  0.00           H  
ATOM   1242 HG21 VAL A  80       8.105   0.154   1.244  1.00  0.00           H  
ATOM   1243 HG22 VAL A  80       7.389   1.565   2.015  1.00  0.00           H  
ATOM   1244 HG23 VAL A  80       9.133   1.315   2.078  1.00  0.00           H  
ATOM   1245  N   GLU A  81      10.380  -2.629   2.807  1.00  0.00           N  
ATOM   1246  CA  GLU A  81      11.677  -3.190   3.299  1.00  0.00           C  
ATOM   1247  C   GLU A  81      12.847  -2.660   2.463  1.00  0.00           C  
ATOM   1248  O   GLU A  81      12.682  -2.285   1.320  1.00  0.00           O  
ATOM   1249  CB  GLU A  81      11.523  -4.706   3.121  1.00  0.00           C  
ATOM   1250  CG  GLU A  81      12.861  -5.409   3.371  1.00  0.00           C  
ATOM   1251  CD  GLU A  81      13.525  -5.738   2.030  1.00  0.00           C  
ATOM   1252  OE1 GLU A  81      13.498  -4.891   1.152  1.00  0.00           O  
ATOM   1253  OE2 GLU A  81      14.049  -6.833   1.905  1.00  0.00           O1-
ATOM   1254  H   GLU A  81      10.122  -2.740   1.868  1.00  0.00           H  
ATOM   1255  HA  GLU A  81      11.819  -2.955   4.342  1.00  0.00           H  
ATOM   1256  HB2 GLU A  81      10.788  -5.075   3.823  1.00  0.00           H  
ATOM   1257  HB3 GLU A  81      11.192  -4.916   2.115  1.00  0.00           H  
ATOM   1258  HG2 GLU A  81      13.507  -4.762   3.944  1.00  0.00           H  
ATOM   1259  HG3 GLU A  81      12.691  -6.324   3.918  1.00  0.00           H  
ATOM   1260  N   ASN A  82      14.033  -2.633   3.020  1.00  0.00           N  
ATOM   1261  CA  ASN A  82      15.202  -2.131   2.230  1.00  0.00           C  
ATOM   1262  C   ASN A  82      16.370  -3.123   2.267  1.00  0.00           C  
ATOM   1263  O   ASN A  82      16.209  -4.297   2.537  1.00  0.00           O  
ATOM   1264  CB  ASN A  82      15.570  -0.760   2.848  1.00  0.00           C  
ATOM   1265  CG  ASN A  82      16.715  -0.846   3.868  1.00  0.00           C  
ATOM   1266  ND2 ASN A  82      17.882  -0.344   3.570  1.00  0.00           N  
ATOM   1267  OD1 ASN A  82      16.539  -1.365   4.946  1.00  0.00           O  
ATOM   1268  H   ASN A  82      14.151  -2.945   3.946  1.00  0.00           H  
ATOM   1269  HA  ASN A  82      14.898  -1.982   1.206  1.00  0.00           H  
ATOM   1270  HB2 ASN A  82      15.855  -0.082   2.060  1.00  0.00           H  
ATOM   1271  HB3 ASN A  82      14.711  -0.375   3.340  1.00  0.00           H  
ATOM   1272 HD21 ASN A  82      18.025   0.084   2.700  1.00  0.00           H  
ATOM   1273 HD22 ASN A  82      18.617  -0.393   4.217  1.00  0.00           H  
ATOM   1274  N   SER A  83      17.541  -2.637   1.981  1.00  0.00           N  
ATOM   1275  CA  SER A  83      18.754  -3.507   1.966  1.00  0.00           C  
ATOM   1276  C   SER A  83      18.977  -4.200   3.311  1.00  0.00           C  
ATOM   1277  O   SER A  83      19.745  -5.136   3.410  1.00  0.00           O  
ATOM   1278  CB  SER A  83      19.910  -2.555   1.675  1.00  0.00           C  
ATOM   1279  OG  SER A  83      20.276  -1.891   2.879  1.00  0.00           O  
ATOM   1280  H   SER A  83      17.619  -1.684   1.764  1.00  0.00           H  
ATOM   1281  HA  SER A  83      18.679  -4.237   1.182  1.00  0.00           H  
ATOM   1282  HB2 SER A  83      20.755  -3.113   1.306  1.00  0.00           H  
ATOM   1283  HB3 SER A  83      19.604  -1.833   0.931  1.00  0.00           H  
ATOM   1284  HG  SER A  83      21.235  -1.878   2.931  1.00  0.00           H  
ATOM   1285  N   GLU A  84      18.333  -3.751   4.349  1.00  0.00           N  
ATOM   1286  CA  GLU A  84      18.547  -4.406   5.678  1.00  0.00           C  
ATOM   1287  C   GLU A  84      17.489  -3.979   6.699  1.00  0.00           C  
ATOM   1288  O   GLU A  84      17.691  -4.085   7.893  1.00  0.00           O  
ATOM   1289  CB  GLU A  84      19.931  -3.942   6.123  1.00  0.00           C  
ATOM   1290  CG  GLU A  84      19.976  -2.411   6.140  1.00  0.00           C  
ATOM   1291  CD  GLU A  84      21.218  -1.915   5.393  1.00  0.00           C  
ATOM   1292  OE1 GLU A  84      22.081  -2.726   5.102  1.00  0.00           O  
ATOM   1293  OE2 GLU A  84      21.284  -0.728   5.125  1.00  0.00           O1-
ATOM   1294  H   GLU A  84      17.724  -2.989   4.255  1.00  0.00           H  
ATOM   1295  HA  GLU A  84      18.545  -5.479   5.569  1.00  0.00           H  
ATOM   1296  HB2 GLU A  84      20.134  -4.319   7.115  1.00  0.00           H  
ATOM   1297  HB3 GLU A  84      20.672  -4.317   5.436  1.00  0.00           H  
ATOM   1298  HG2 GLU A  84      19.090  -2.022   5.661  1.00  0.00           H  
ATOM   1299  HG3 GLU A  84      20.012  -2.065   7.162  1.00  0.00           H  
ATOM   1300  N   GLY A  85      16.367  -3.508   6.247  1.00  0.00           N  
ATOM   1301  CA  GLY A  85      15.301  -3.088   7.188  1.00  0.00           C  
ATOM   1302  C   GLY A  85      14.046  -3.906   6.898  1.00  0.00           C  
ATOM   1303  O   GLY A  85      14.055  -4.787   6.061  1.00  0.00           O  
ATOM   1304  H   GLY A  85      16.220  -3.433   5.288  1.00  0.00           H  
ATOM   1305  HA2 GLY A  85      15.625  -3.251   8.206  1.00  0.00           H  
ATOM   1306  HA3 GLY A  85      15.085  -2.050   7.039  1.00  0.00           H  
ATOM   1307  N   LYS A  86      12.962  -3.623   7.564  1.00  0.00           N  
ATOM   1308  CA  LYS A  86      11.715  -4.393   7.293  1.00  0.00           C  
ATOM   1309  C   LYS A  86      10.546  -3.845   8.121  1.00  0.00           C  
ATOM   1310  O   LYS A  86      10.156  -4.421   9.117  1.00  0.00           O  
ATOM   1311  CB  LYS A  86      12.028  -5.832   7.710  1.00  0.00           C  
ATOM   1312  CG  LYS A  86      11.428  -6.801   6.689  1.00  0.00           C  
ATOM   1313  CD  LYS A  86       9.902  -6.769   6.789  1.00  0.00           C  
ATOM   1314  CE  LYS A  86       9.345  -8.173   6.542  1.00  0.00           C  
ATOM   1315  NZ  LYS A  86       8.029  -7.953   5.880  1.00  0.00           N1+
ATOM   1316  H   LYS A  86      12.964  -2.903   8.229  1.00  0.00           H  
ATOM   1317  HA  LYS A  86      11.485  -4.357   6.237  1.00  0.00           H  
ATOM   1318  HB2 LYS A  86      13.098  -5.971   7.754  1.00  0.00           H  
ATOM   1319  HB3 LYS A  86      11.599  -6.026   8.681  1.00  0.00           H  
ATOM   1320  HG2 LYS A  86      11.731  -6.507   5.694  1.00  0.00           H  
ATOM   1321  HG3 LYS A  86      11.780  -7.801   6.892  1.00  0.00           H  
ATOM   1322  HD2 LYS A  86       9.613  -6.435   7.775  1.00  0.00           H  
ATOM   1323  HD3 LYS A  86       9.506  -6.091   6.048  1.00  0.00           H  
ATOM   1324  HE2 LYS A  86      10.007  -8.729   5.893  1.00  0.00           H  
ATOM   1325  HE3 LYS A  86       9.206  -8.693   7.476  1.00  0.00           H  
ATOM   1326  HZ1 LYS A  86       8.162  -7.377   5.025  1.00  0.00           H  
ATOM   1327  HZ2 LYS A  86       7.615  -8.871   5.619  1.00  0.00           H  
ATOM   1328  HZ3 LYS A  86       7.390  -7.457   6.533  1.00  0.00           H  
ATOM   1329  N   GLN A  87       9.975  -2.747   7.707  1.00  0.00           N  
ATOM   1330  CA  GLN A  87       8.820  -2.173   8.458  1.00  0.00           C  
ATOM   1331  C   GLN A  87       7.591  -2.149   7.544  1.00  0.00           C  
ATOM   1332  O   GLN A  87       7.684  -2.463   6.377  1.00  0.00           O  
ATOM   1333  CB  GLN A  87       9.251  -0.752   8.832  1.00  0.00           C  
ATOM   1334  CG  GLN A  87       8.156  -0.095   9.674  1.00  0.00           C  
ATOM   1335  CD  GLN A  87       8.682   1.196  10.300  1.00  0.00           C  
ATOM   1336  NE2 GLN A  87       7.842   2.155  10.574  1.00  0.00           N  
ATOM   1337  OE1 GLN A  87       9.864   1.332  10.544  1.00  0.00           O  
ATOM   1338  H   GLN A  87      10.295  -2.307   6.895  1.00  0.00           H  
ATOM   1339  HA  GLN A  87       8.622  -2.750   9.348  1.00  0.00           H  
ATOM   1340  HB2 GLN A  87      10.169  -0.792   9.399  1.00  0.00           H  
ATOM   1341  HB3 GLN A  87       9.406  -0.175   7.933  1.00  0.00           H  
ATOM   1342  HG2 GLN A  87       7.309   0.134   9.044  1.00  0.00           H  
ATOM   1343  HG3 GLN A  87       7.849  -0.772  10.457  1.00  0.00           H  
ATOM   1344 HE21 GLN A  87       6.889   2.041  10.380  1.00  0.00           H  
ATOM   1345 HE22 GLN A  87       8.164   2.992  10.968  1.00  0.00           H  
ATOM   1346  N   GLU A  88       6.440  -1.793   8.054  1.00  0.00           N  
ATOM   1347  CA  GLU A  88       5.225  -1.766   7.188  1.00  0.00           C  
ATOM   1348  C   GLU A  88       4.252  -0.679   7.647  1.00  0.00           C  
ATOM   1349  O   GLU A  88       4.534   0.101   8.534  1.00  0.00           O  
ATOM   1350  CB  GLU A  88       4.596  -3.156   7.346  1.00  0.00           C  
ATOM   1351  CG  GLU A  88       4.058  -3.334   8.769  1.00  0.00           C  
ATOM   1352  CD  GLU A  88       2.550  -3.591   8.714  1.00  0.00           C  
ATOM   1353  OE1 GLU A  88       1.921  -3.108   7.787  1.00  0.00           O  
ATOM   1354  OE2 GLU A  88       2.051  -4.269   9.597  1.00  0.00           O1-
ATOM   1355  H   GLU A  88       6.373  -1.552   9.000  1.00  0.00           H  
ATOM   1356  HA  GLU A  88       5.496  -1.602   6.153  1.00  0.00           H  
ATOM   1357  HB2 GLU A  88       3.785  -3.264   6.640  1.00  0.00           H  
ATOM   1358  HB3 GLU A  88       5.343  -3.911   7.151  1.00  0.00           H  
ATOM   1359  HG2 GLU A  88       4.551  -4.173   9.239  1.00  0.00           H  
ATOM   1360  HG3 GLU A  88       4.248  -2.438   9.341  1.00  0.00           H  
ATOM   1361  N   ALA A  89       3.103  -0.640   7.042  1.00  0.00           N  
ATOM   1362  CA  ALA A  89       2.079   0.371   7.412  1.00  0.00           C  
ATOM   1363  C   ALA A  89       0.702  -0.260   7.245  1.00  0.00           C  
ATOM   1364  O   ALA A  89       0.235  -0.464   6.141  1.00  0.00           O  
ATOM   1365  CB  ALA A  89       2.276   1.515   6.419  1.00  0.00           C  
ATOM   1366  H   ALA A  89       2.905  -1.291   6.339  1.00  0.00           H  
ATOM   1367  HA  ALA A  89       2.228   0.717   8.422  1.00  0.00           H  
ATOM   1368  HB1 ALA A  89       3.028   1.238   5.695  1.00  0.00           H  
ATOM   1369  HB2 ALA A  89       1.344   1.713   5.912  1.00  0.00           H  
ATOM   1370  HB3 ALA A  89       2.594   2.400   6.948  1.00  0.00           H  
ATOM   1371  N   GLU A  90       0.063  -0.611   8.322  1.00  0.00           N  
ATOM   1372  CA  GLU A  90      -1.263  -1.270   8.199  1.00  0.00           C  
ATOM   1373  C   GLU A  90      -2.406  -0.250   8.186  1.00  0.00           C  
ATOM   1374  O   GLU A  90      -2.486   0.639   9.010  1.00  0.00           O  
ATOM   1375  CB  GLU A  90      -1.369  -2.179   9.422  1.00  0.00           C  
ATOM   1376  CG  GLU A  90      -1.198  -3.637   8.991  1.00  0.00           C  
ATOM   1377  CD  GLU A  90      -2.435  -4.091   8.210  1.00  0.00           C  
ATOM   1378  OE1 GLU A  90      -2.914  -3.319   7.396  1.00  0.00           O  
ATOM   1379  OE2 GLU A  90      -2.879  -5.204   8.437  1.00  0.00           O1-
ATOM   1380  H   GLU A  90       0.464  -0.468   9.204  1.00  0.00           H  
ATOM   1381  HA  GLU A  90      -1.288  -1.869   7.300  1.00  0.00           H  
ATOM   1382  HB2 GLU A  90      -0.595  -1.919  10.131  1.00  0.00           H  
ATOM   1383  HB3 GLU A  90      -2.336  -2.052   9.883  1.00  0.00           H  
ATOM   1384  HG2 GLU A  90      -0.323  -3.726   8.364  1.00  0.00           H  
ATOM   1385  HG3 GLU A  90      -1.079  -4.259   9.865  1.00  0.00           H  
ATOM   1386  N   PHE A  91      -3.302  -0.411   7.257  1.00  0.00           N  
ATOM   1387  CA  PHE A  91      -4.485   0.487   7.144  1.00  0.00           C  
ATOM   1388  C   PHE A  91      -5.629  -0.350   6.591  1.00  0.00           C  
ATOM   1389  O   PHE A  91      -5.463  -1.528   6.365  1.00  0.00           O  
ATOM   1390  CB  PHE A  91      -4.078   1.583   6.154  1.00  0.00           C  
ATOM   1391  CG  PHE A  91      -3.634   0.962   4.847  1.00  0.00           C  
ATOM   1392  CD1 PHE A  91      -4.575   0.375   3.990  1.00  0.00           C  
ATOM   1393  CD2 PHE A  91      -2.281   0.979   4.488  1.00  0.00           C  
ATOM   1394  CE1 PHE A  91      -4.162  -0.195   2.780  1.00  0.00           C  
ATOM   1395  CE2 PHE A  91      -1.870   0.408   3.277  1.00  0.00           C  
ATOM   1396  CZ  PHE A  91      -2.810  -0.178   2.424  1.00  0.00           C  
ATOM   1397  H   PHE A  91      -3.209  -1.154   6.627  1.00  0.00           H  
ATOM   1398  HA  PHE A  91      -4.747   0.914   8.101  1.00  0.00           H  
ATOM   1399  HB2 PHE A  91      -4.922   2.233   5.973  1.00  0.00           H  
ATOM   1400  HB3 PHE A  91      -3.265   2.159   6.570  1.00  0.00           H  
ATOM   1401  HD1 PHE A  91      -5.620   0.361   4.263  1.00  0.00           H  
ATOM   1402  HD2 PHE A  91      -1.553   1.431   5.146  1.00  0.00           H  
ATOM   1403  HE1 PHE A  91      -4.886  -0.648   2.121  1.00  0.00           H  
ATOM   1404  HE2 PHE A  91      -0.828   0.421   3.000  1.00  0.00           H  
ATOM   1405  HZ  PHE A  91      -2.492  -0.618   1.490  1.00  0.00           H  
ATOM   1406  N   THR A  92      -6.778   0.214   6.359  1.00  0.00           N  
ATOM   1407  CA  THR A  92      -7.877  -0.618   5.807  1.00  0.00           C  
ATOM   1408  C   THR A  92      -8.764   0.180   4.843  1.00  0.00           C  
ATOM   1409  O   THR A  92      -9.379   1.162   5.205  1.00  0.00           O  
ATOM   1410  CB  THR A  92      -8.680  -1.106   7.015  1.00  0.00           C  
ATOM   1411  CG2 THR A  92      -7.746  -1.782   8.018  1.00  0.00           C  
ATOM   1412  OG1 THR A  92      -9.333  -0.004   7.629  1.00  0.00           O  
ATOM   1413  H   THR A  92      -6.915   1.160   6.539  1.00  0.00           H  
ATOM   1414  HA  THR A  92      -7.459  -1.469   5.292  1.00  0.00           H  
ATOM   1415  HB  THR A  92      -9.413  -1.825   6.686  1.00  0.00           H  
ATOM   1416  HG1 THR A  92     -10.151   0.157   7.153  1.00  0.00           H  
ATOM   1417 HG21 THR A  92      -7.083  -2.456   7.495  1.00  0.00           H  
ATOM   1418 HG22 THR A  92      -7.165  -1.032   8.532  1.00  0.00           H  
ATOM   1419 HG23 THR A  92      -8.332  -2.339   8.734  1.00  0.00           H  
ATOM   1420  N   LEU A  93      -8.845  -0.272   3.615  1.00  0.00           N  
ATOM   1421  CA  LEU A  93      -9.701   0.394   2.597  1.00  0.00           C  
ATOM   1422  C   LEU A  93     -10.920  -0.479   2.368  1.00  0.00           C  
ATOM   1423  O   LEU A  93     -10.872  -1.468   1.665  1.00  0.00           O  
ATOM   1424  CB  LEU A  93      -8.833   0.445   1.348  1.00  0.00           C  
ATOM   1425  CG  LEU A  93      -7.827   1.618   1.374  1.00  0.00           C  
ATOM   1426  CD1 LEU A  93      -7.868   2.443   2.676  1.00  0.00           C  
ATOM   1427  CD2 LEU A  93      -6.415   1.054   1.197  1.00  0.00           C  
ATOM   1428  H   LEU A  93      -8.355  -1.086   3.367  1.00  0.00           H  
ATOM   1429  HA  LEU A  93      -9.990   1.381   2.912  1.00  0.00           H  
ATOM   1430  HB2 LEU A  93      -8.288  -0.483   1.267  1.00  0.00           H  
ATOM   1431  HB3 LEU A  93      -9.470   0.551   0.484  1.00  0.00           H  
ATOM   1432  HG  LEU A  93      -8.062   2.263   0.556  1.00  0.00           H  
ATOM   1433 HD11 LEU A  93      -7.652   1.805   3.514  1.00  0.00           H  
ATOM   1434 HD12 LEU A  93      -7.130   3.228   2.626  1.00  0.00           H  
ATOM   1435 HD13 LEU A  93      -8.847   2.881   2.796  1.00  0.00           H  
ATOM   1436 HD21 LEU A  93      -6.448  -0.023   1.279  1.00  0.00           H  
ATOM   1437 HD22 LEU A  93      -6.033   1.327   0.228  1.00  0.00           H  
ATOM   1438 HD23 LEU A  93      -5.768   1.450   1.967  1.00  0.00           H  
ATOM   1439  N   THR A  94     -11.993  -0.130   2.996  1.00  0.00           N  
ATOM   1440  CA  THR A  94     -13.234  -0.961   2.898  1.00  0.00           C  
ATOM   1441  C   THR A  94     -14.136  -0.565   1.743  1.00  0.00           C  
ATOM   1442  O   THR A  94     -14.025   0.493   1.153  1.00  0.00           O  
ATOM   1443  CB  THR A  94     -13.965  -0.764   4.229  1.00  0.00           C  
ATOM   1444  CG2 THR A  94     -14.583  -2.093   4.656  1.00  0.00           C  
ATOM   1445  OG1 THR A  94     -13.051  -0.322   5.227  1.00  0.00           O  
ATOM   1446  H   THR A  94     -11.968   0.667   3.565  1.00  0.00           H  
ATOM   1447  HA  THR A  94     -12.978  -2.003   2.789  1.00  0.00           H  
ATOM   1448  HB  THR A  94     -14.748  -0.032   4.106  1.00  0.00           H  
ATOM   1449  HG1 THR A  94     -13.024   0.635   5.200  1.00  0.00           H  
ATOM   1450 HG21 THR A  94     -14.011  -2.906   4.233  1.00  0.00           H  
ATOM   1451 HG22 THR A  94     -14.571  -2.166   5.732  1.00  0.00           H  
ATOM   1452 HG23 THR A  94     -15.601  -2.146   4.301  1.00  0.00           H  
ATOM   1453  N   ILE A  95     -15.035  -1.453   1.434  1.00  0.00           N  
ATOM   1454  CA  ILE A  95     -15.985  -1.237   0.328  1.00  0.00           C  
ATOM   1455  C   ILE A  95     -17.371  -1.752   0.731  1.00  0.00           C  
ATOM   1456  O   ILE A  95     -17.507  -2.633   1.557  1.00  0.00           O  
ATOM   1457  CB  ILE A  95     -15.393  -2.012  -0.865  1.00  0.00           C  
ATOM   1458  CG1 ILE A  95     -14.777  -3.360  -0.433  1.00  0.00           C  
ATOM   1459  CG2 ILE A  95     -14.276  -1.165  -1.468  1.00  0.00           C  
ATOM   1460  CD1 ILE A  95     -15.787  -4.201   0.345  1.00  0.00           C  
ATOM   1461  H   ILE A  95     -15.080  -2.283   1.941  1.00  0.00           H  
ATOM   1462  HA  ILE A  95     -16.035  -0.193   0.088  1.00  0.00           H  
ATOM   1463  HB  ILE A  95     -16.162  -2.179  -1.607  1.00  0.00           H  
ATOM   1464 HG12 ILE A  95     -14.465  -3.904  -1.312  1.00  0.00           H  
ATOM   1465 HG13 ILE A  95     -13.917  -3.171   0.190  1.00  0.00           H  
ATOM   1466 HG21 ILE A  95     -13.543  -0.947  -0.702  1.00  0.00           H  
ATOM   1467 HG22 ILE A  95     -13.805  -1.709  -2.271  1.00  0.00           H  
ATOM   1468 HG23 ILE A  95     -14.687  -0.242  -1.844  1.00  0.00           H  
ATOM   1469 HD11 ILE A  95     -16.783  -3.984  -0.005  1.00  0.00           H  
ATOM   1470 HD12 ILE A  95     -15.572  -5.248   0.194  1.00  0.00           H  
ATOM   1471 HD13 ILE A  95     -15.715  -3.971   1.397  1.00  0.00           H  
ATOM   1472  N   GLN A  96     -18.403  -1.186   0.181  1.00  0.00           N  
ATOM   1473  CA  GLN A  96     -19.784  -1.625   0.550  1.00  0.00           C  
ATOM   1474  C   GLN A  96     -20.609  -1.922  -0.703  1.00  0.00           C  
ATOM   1475  O   GLN A  96     -21.685  -1.391  -0.890  1.00  0.00           O  
ATOM   1476  CB  GLN A  96     -20.392  -0.446   1.315  1.00  0.00           C  
ATOM   1477  CG  GLN A  96     -19.561  -0.146   2.565  1.00  0.00           C  
ATOM   1478  CD  GLN A  96     -20.198  -0.822   3.781  1.00  0.00           C  
ATOM   1479  NE2 GLN A  96     -20.835  -1.951   3.627  1.00  0.00           N  
ATOM   1480  OE1 GLN A  96     -20.115  -0.318   4.884  1.00  0.00           O  
ATOM   1481  H   GLN A  96     -18.271  -0.463  -0.460  1.00  0.00           H  
ATOM   1482  HA  GLN A  96     -19.742  -2.495   1.184  1.00  0.00           H  
ATOM   1483  HB2 GLN A  96     -20.407   0.425   0.677  1.00  0.00           H  
ATOM   1484  HB3 GLN A  96     -21.402  -0.692   1.609  1.00  0.00           H  
ATOM   1485  HG2 GLN A  96     -18.558  -0.519   2.430  1.00  0.00           H  
ATOM   1486  HG3 GLN A  96     -19.528   0.921   2.727  1.00  0.00           H  
ATOM   1487 HE21 GLN A  96     -20.903  -2.358   2.739  1.00  0.00           H  
ATOM   1488 HE22 GLN A  96     -21.247  -2.390   4.400  1.00  0.00           H  
ATOM   1489  N   LYS A  97     -20.118  -2.768  -1.559  1.00  0.00           N  
ATOM   1490  CA  LYS A  97     -20.875  -3.103  -2.798  1.00  0.00           C  
ATOM   1491  C   LYS A  97     -20.680  -4.579  -3.155  1.00  0.00           C  
ATOM   1492  O   LYS A  97     -21.462  -5.085  -3.944  1.00  0.00           O  
ATOM   1493  CB  LYS A  97     -20.276  -2.206  -3.880  1.00  0.00           C  
ATOM   1494  CG  LYS A  97     -21.043  -2.401  -5.190  1.00  0.00           C  
ATOM   1495  CD  LYS A  97     -20.271  -1.746  -6.337  1.00  0.00           C  
ATOM   1496  CE  LYS A  97     -20.576  -2.481  -7.644  1.00  0.00           C  
ATOM   1497  NZ  LYS A  97     -19.278  -2.522  -8.373  1.00  0.00           N1+
ATOM   1498  OXT LYS A  97     -19.753  -5.177  -2.634  1.00  0.00           O1-
ATOM   1499  H   LYS A  97     -19.252  -3.185  -1.385  1.00  0.00           H  
ATOM   1500  HA  LYS A  97     -21.923  -2.880  -2.673  1.00  0.00           H  
ATOM   1501  HB2 LYS A  97     -20.346  -1.174  -3.570  1.00  0.00           H  
ATOM   1502  HB3 LYS A  97     -19.241  -2.465  -4.030  1.00  0.00           H  
ATOM   1503  HG2 LYS A  97     -21.155  -3.457  -5.387  1.00  0.00           H  
ATOM   1504  HG3 LYS A  97     -22.018  -1.944  -5.108  1.00  0.00           H  
ATOM   1505  HD2 LYS A  97     -20.569  -0.711  -6.427  1.00  0.00           H  
ATOM   1506  HD3 LYS A  97     -19.212  -1.799  -6.135  1.00  0.00           H  
ATOM   1507  HE2 LYS A  97     -20.927  -3.483  -7.437  1.00  0.00           H  
ATOM   1508  HE3 LYS A  97     -21.307  -1.936  -8.221  1.00  0.00           H  
ATOM   1509  HZ1 LYS A  97     -18.825  -1.589  -8.325  1.00  0.00           H  
ATOM   1510  HZ2 LYS A  97     -18.655  -3.229  -7.935  1.00  0.00           H  
ATOM   1511  HZ3 LYS A  97     -19.447  -2.776  -9.368  1.00  0.00           H  
END
