# Supplementary material
Source: publisher figshare collection journal article supplement (https://plos.figshare.com/articles/dataset/_/11411415)

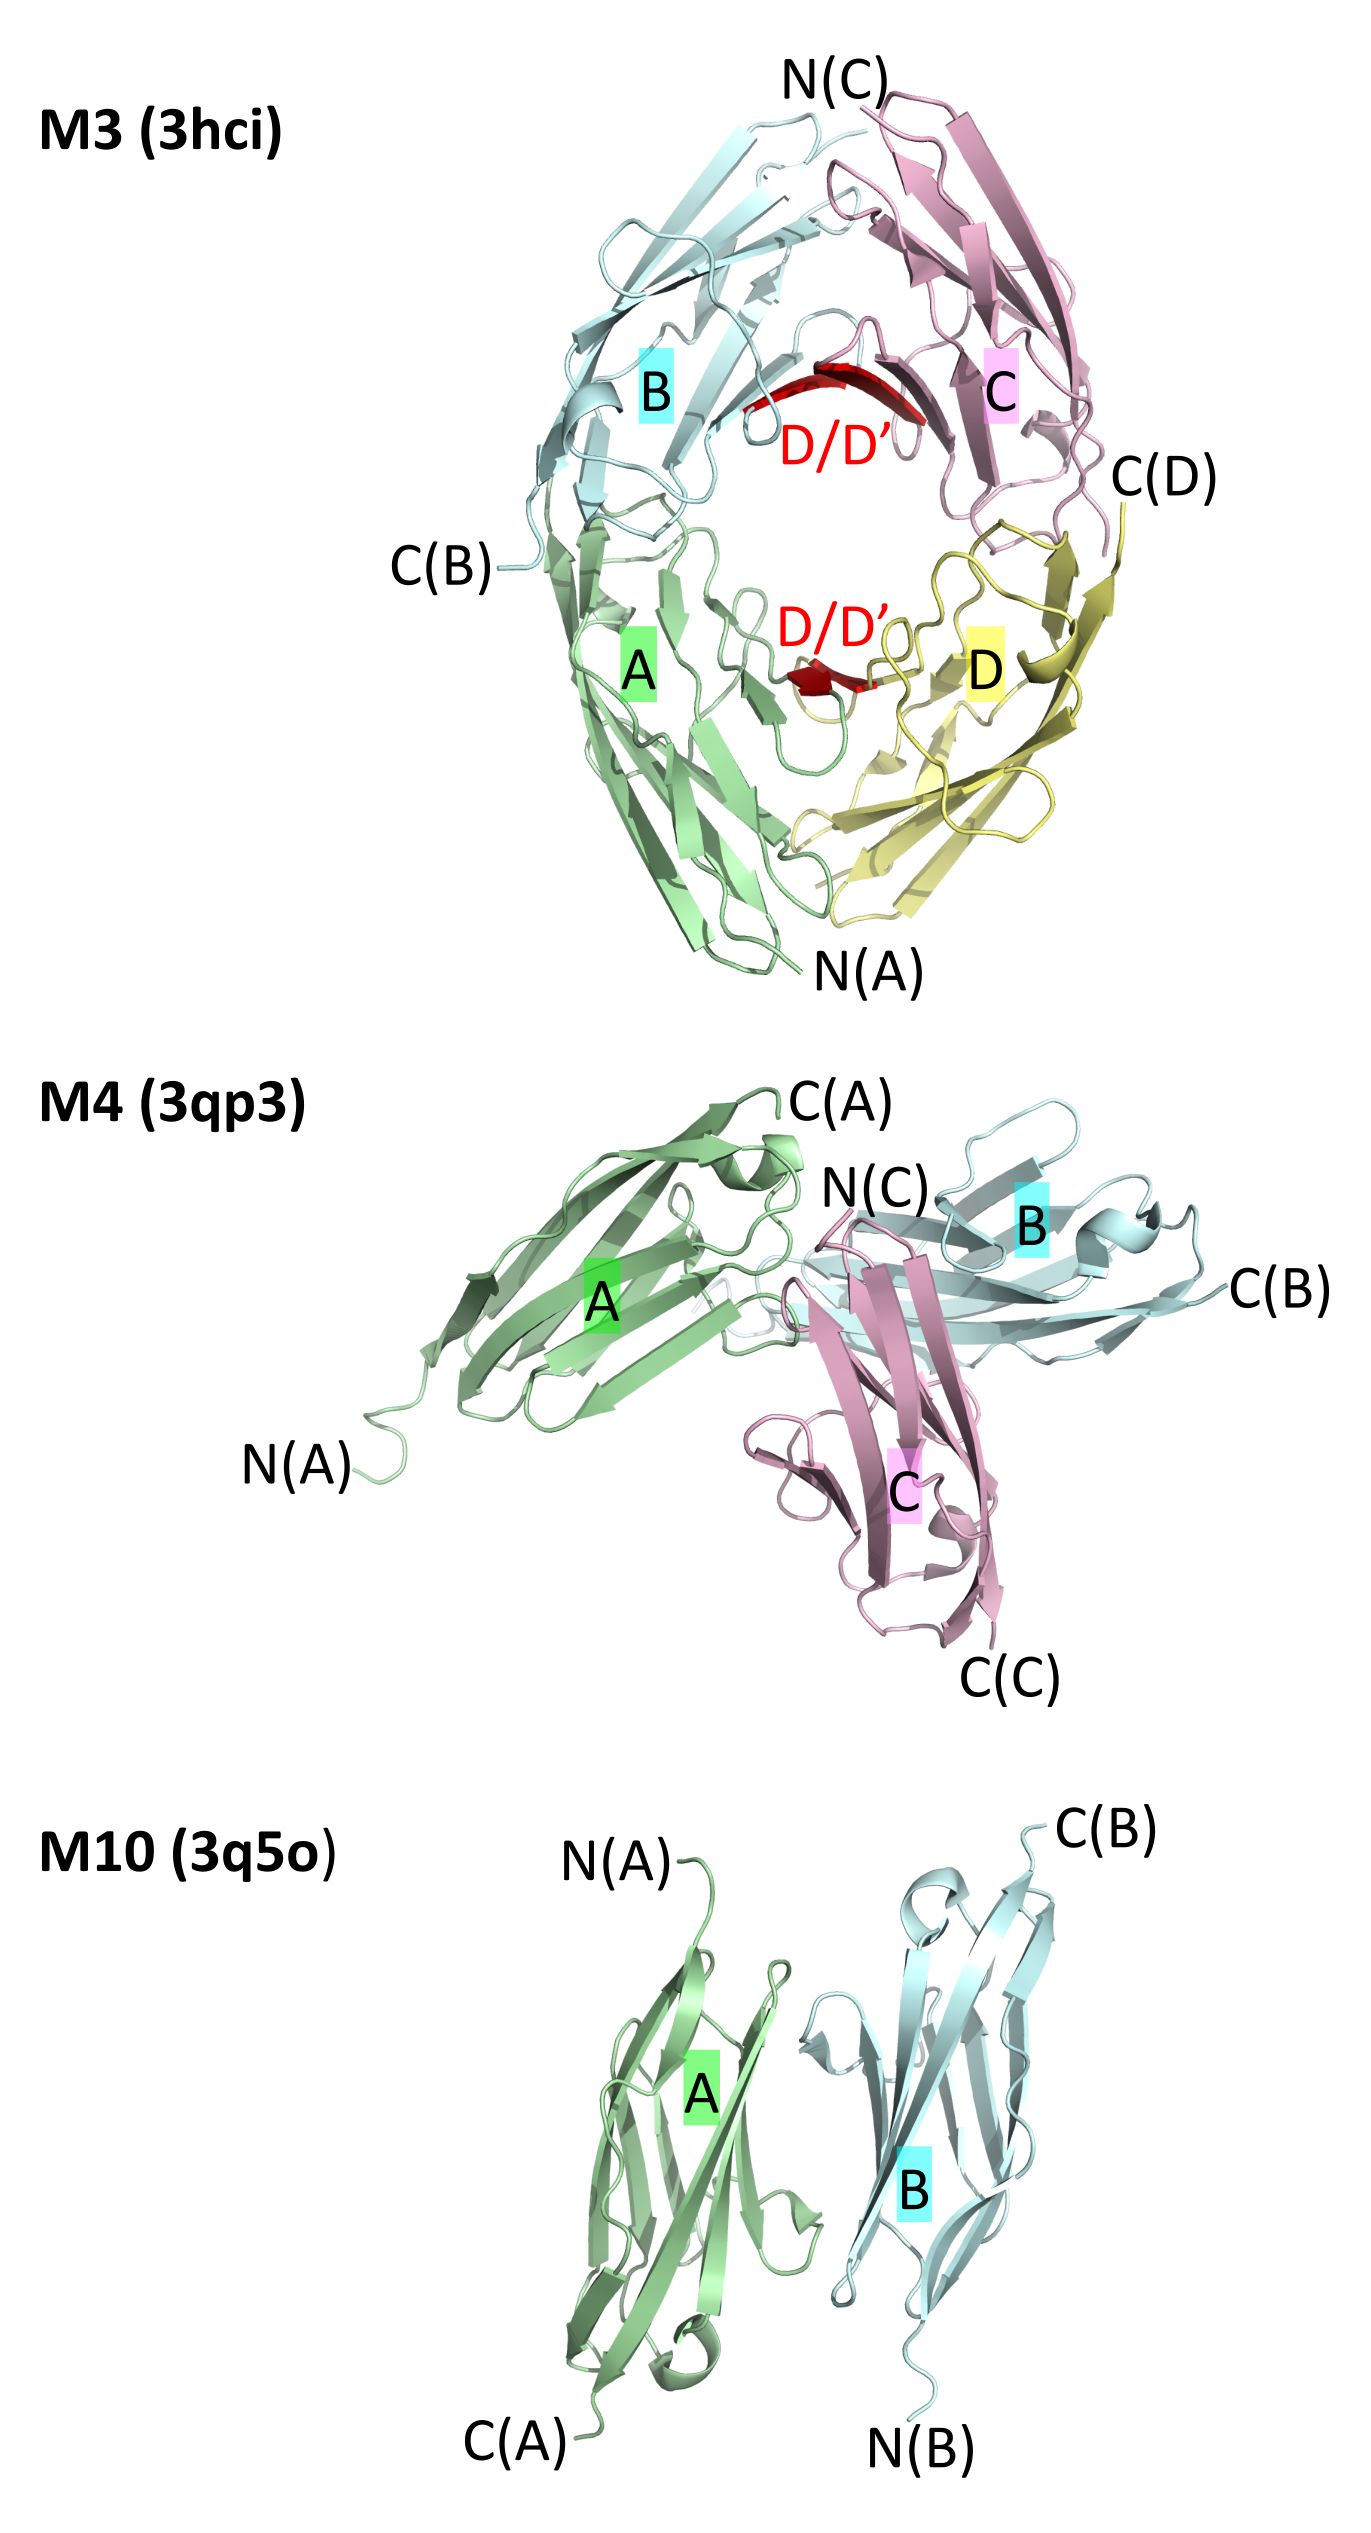

Supplement: Supplementary file 1 [file 1 › pone.0226693.s001.tif]

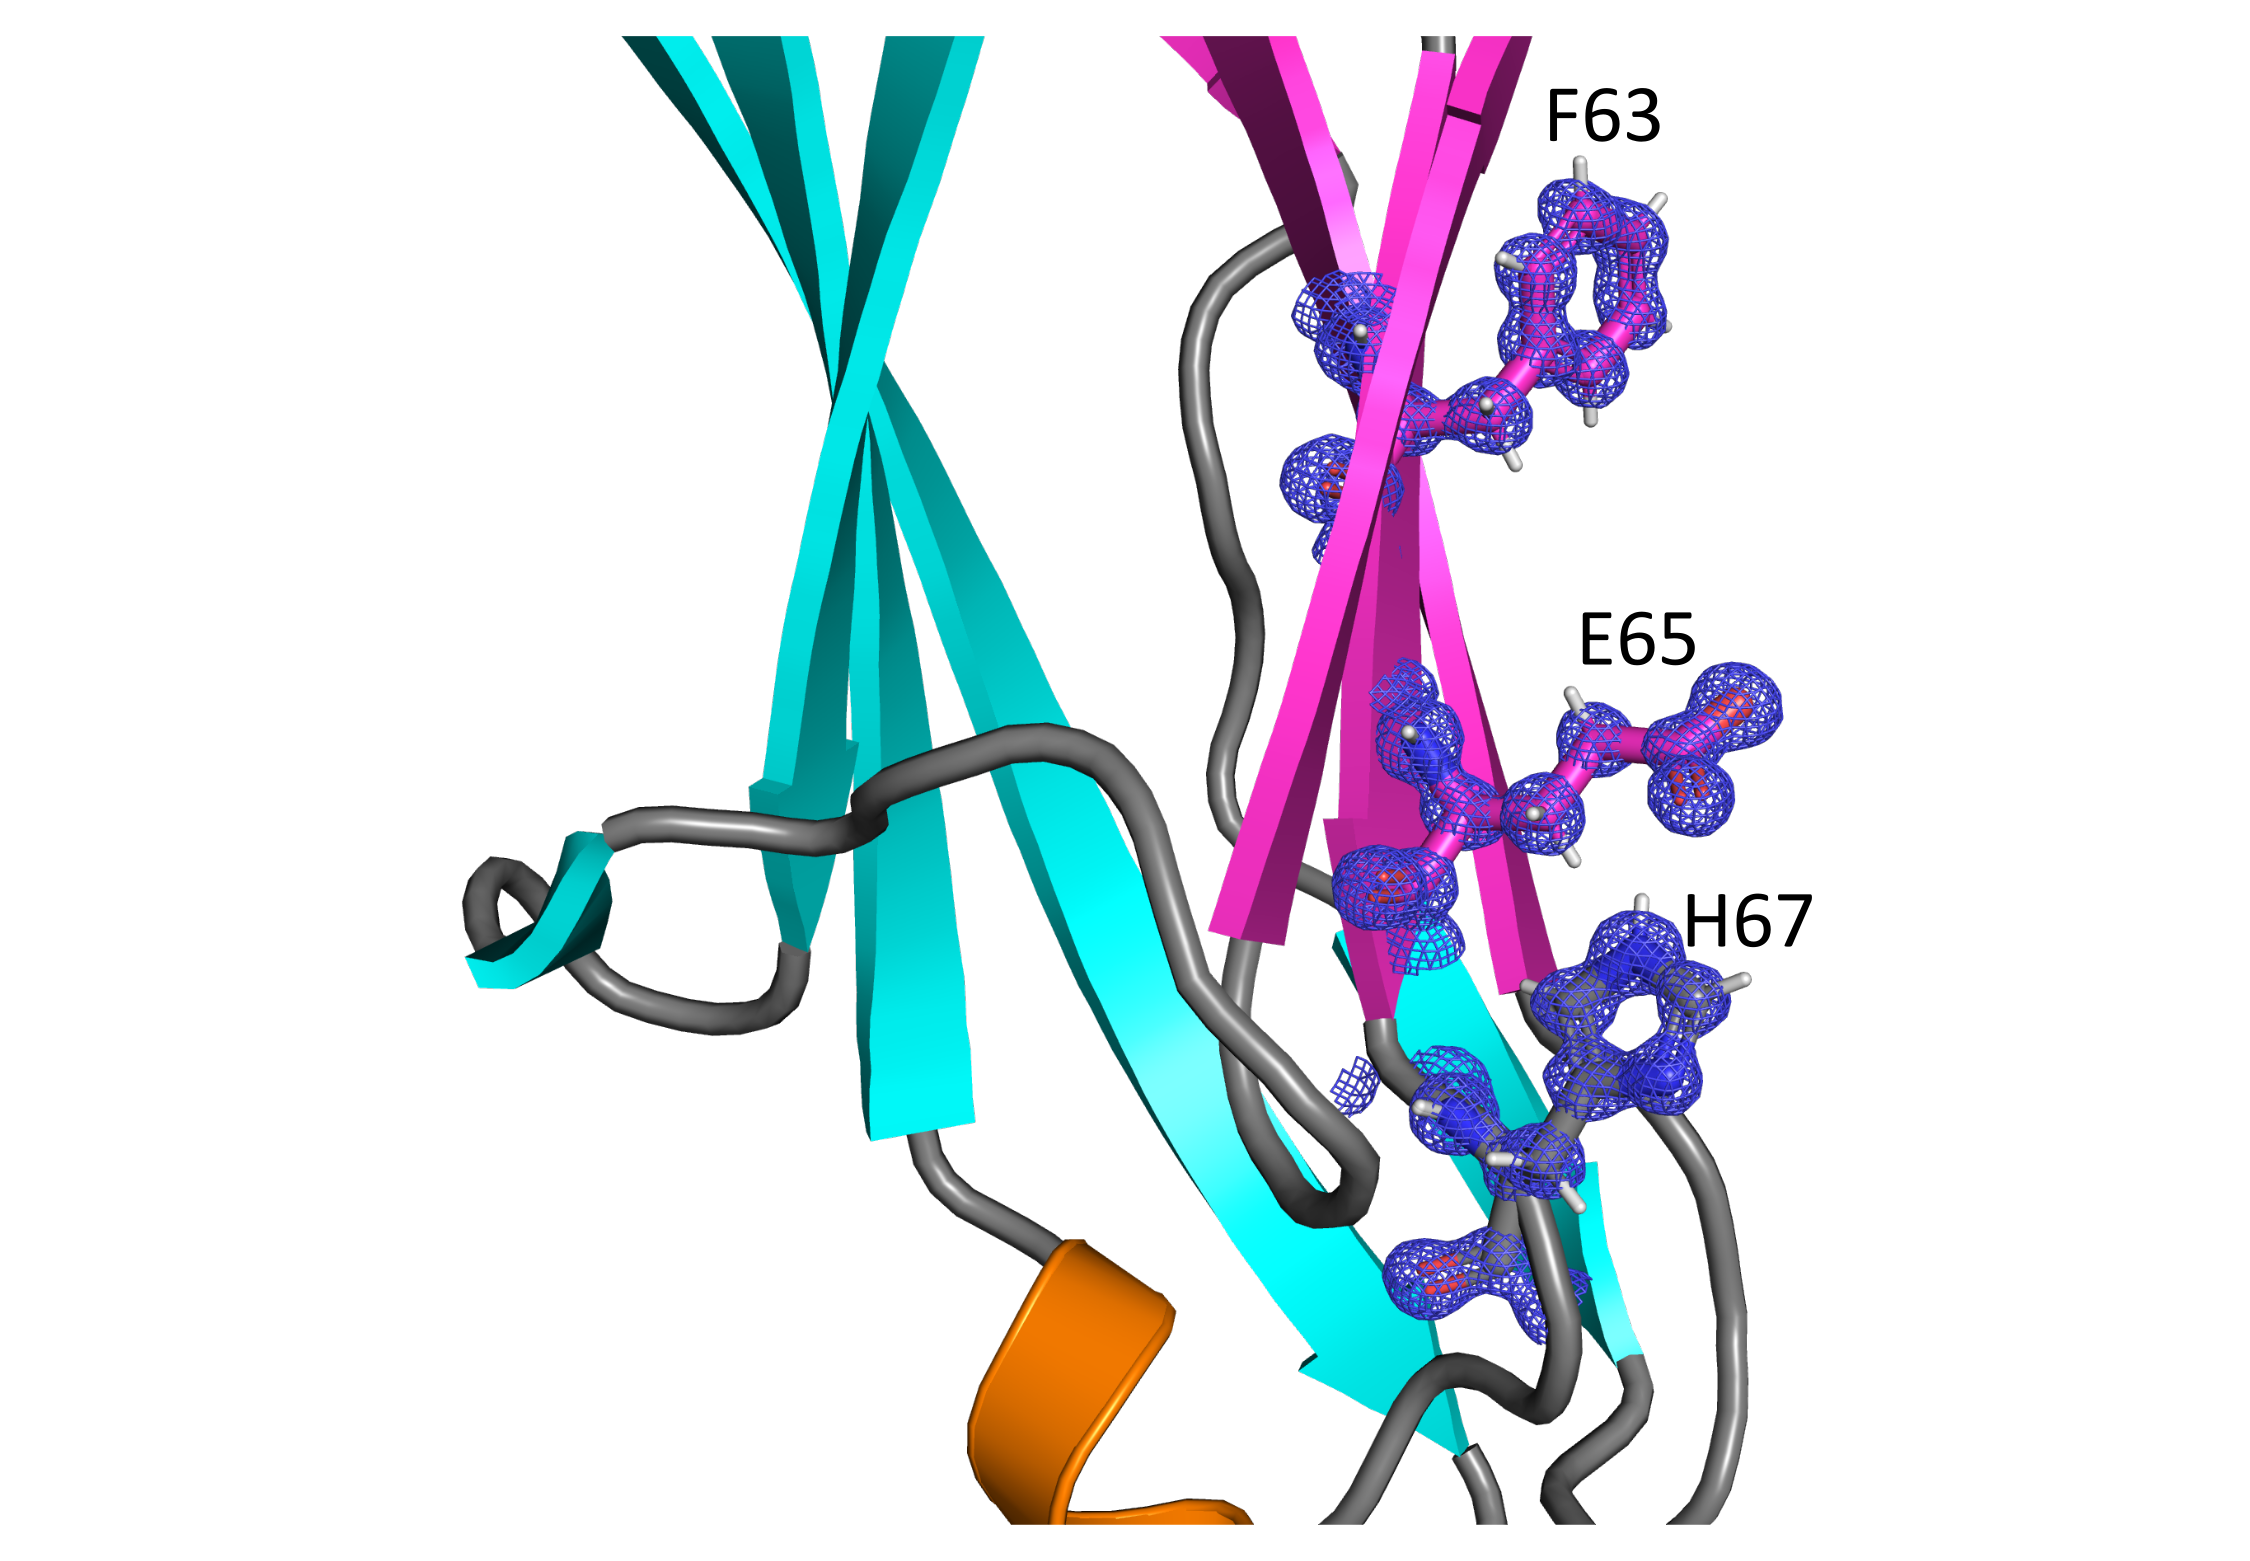

Supplement: Supplementary file 1 [file 1 › pone.0226693.s002.tif]

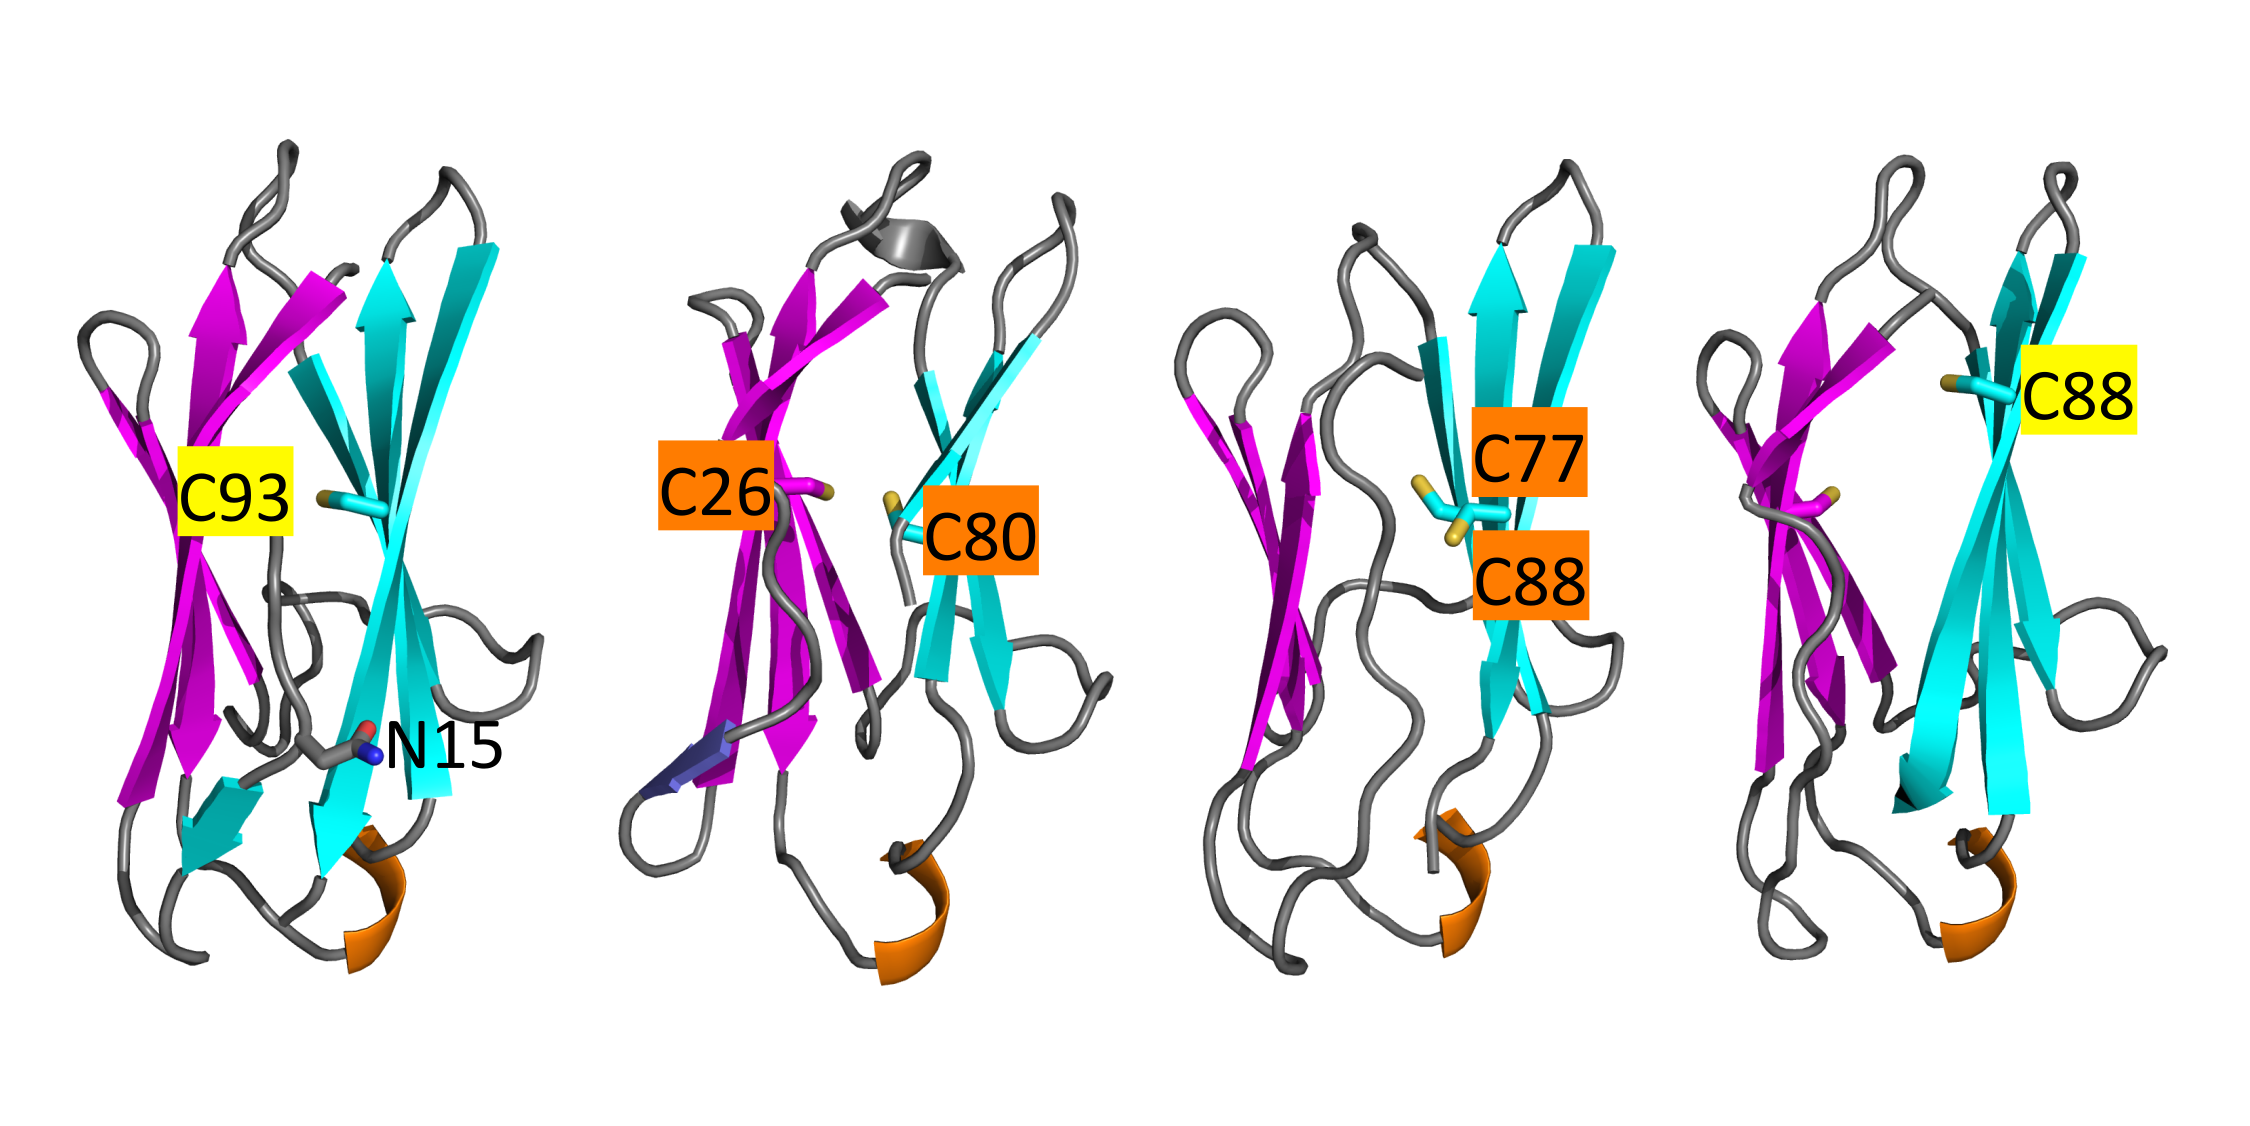

Supplement: Supplementary file 1 [file 1 › pone.0226693.s003.tif]

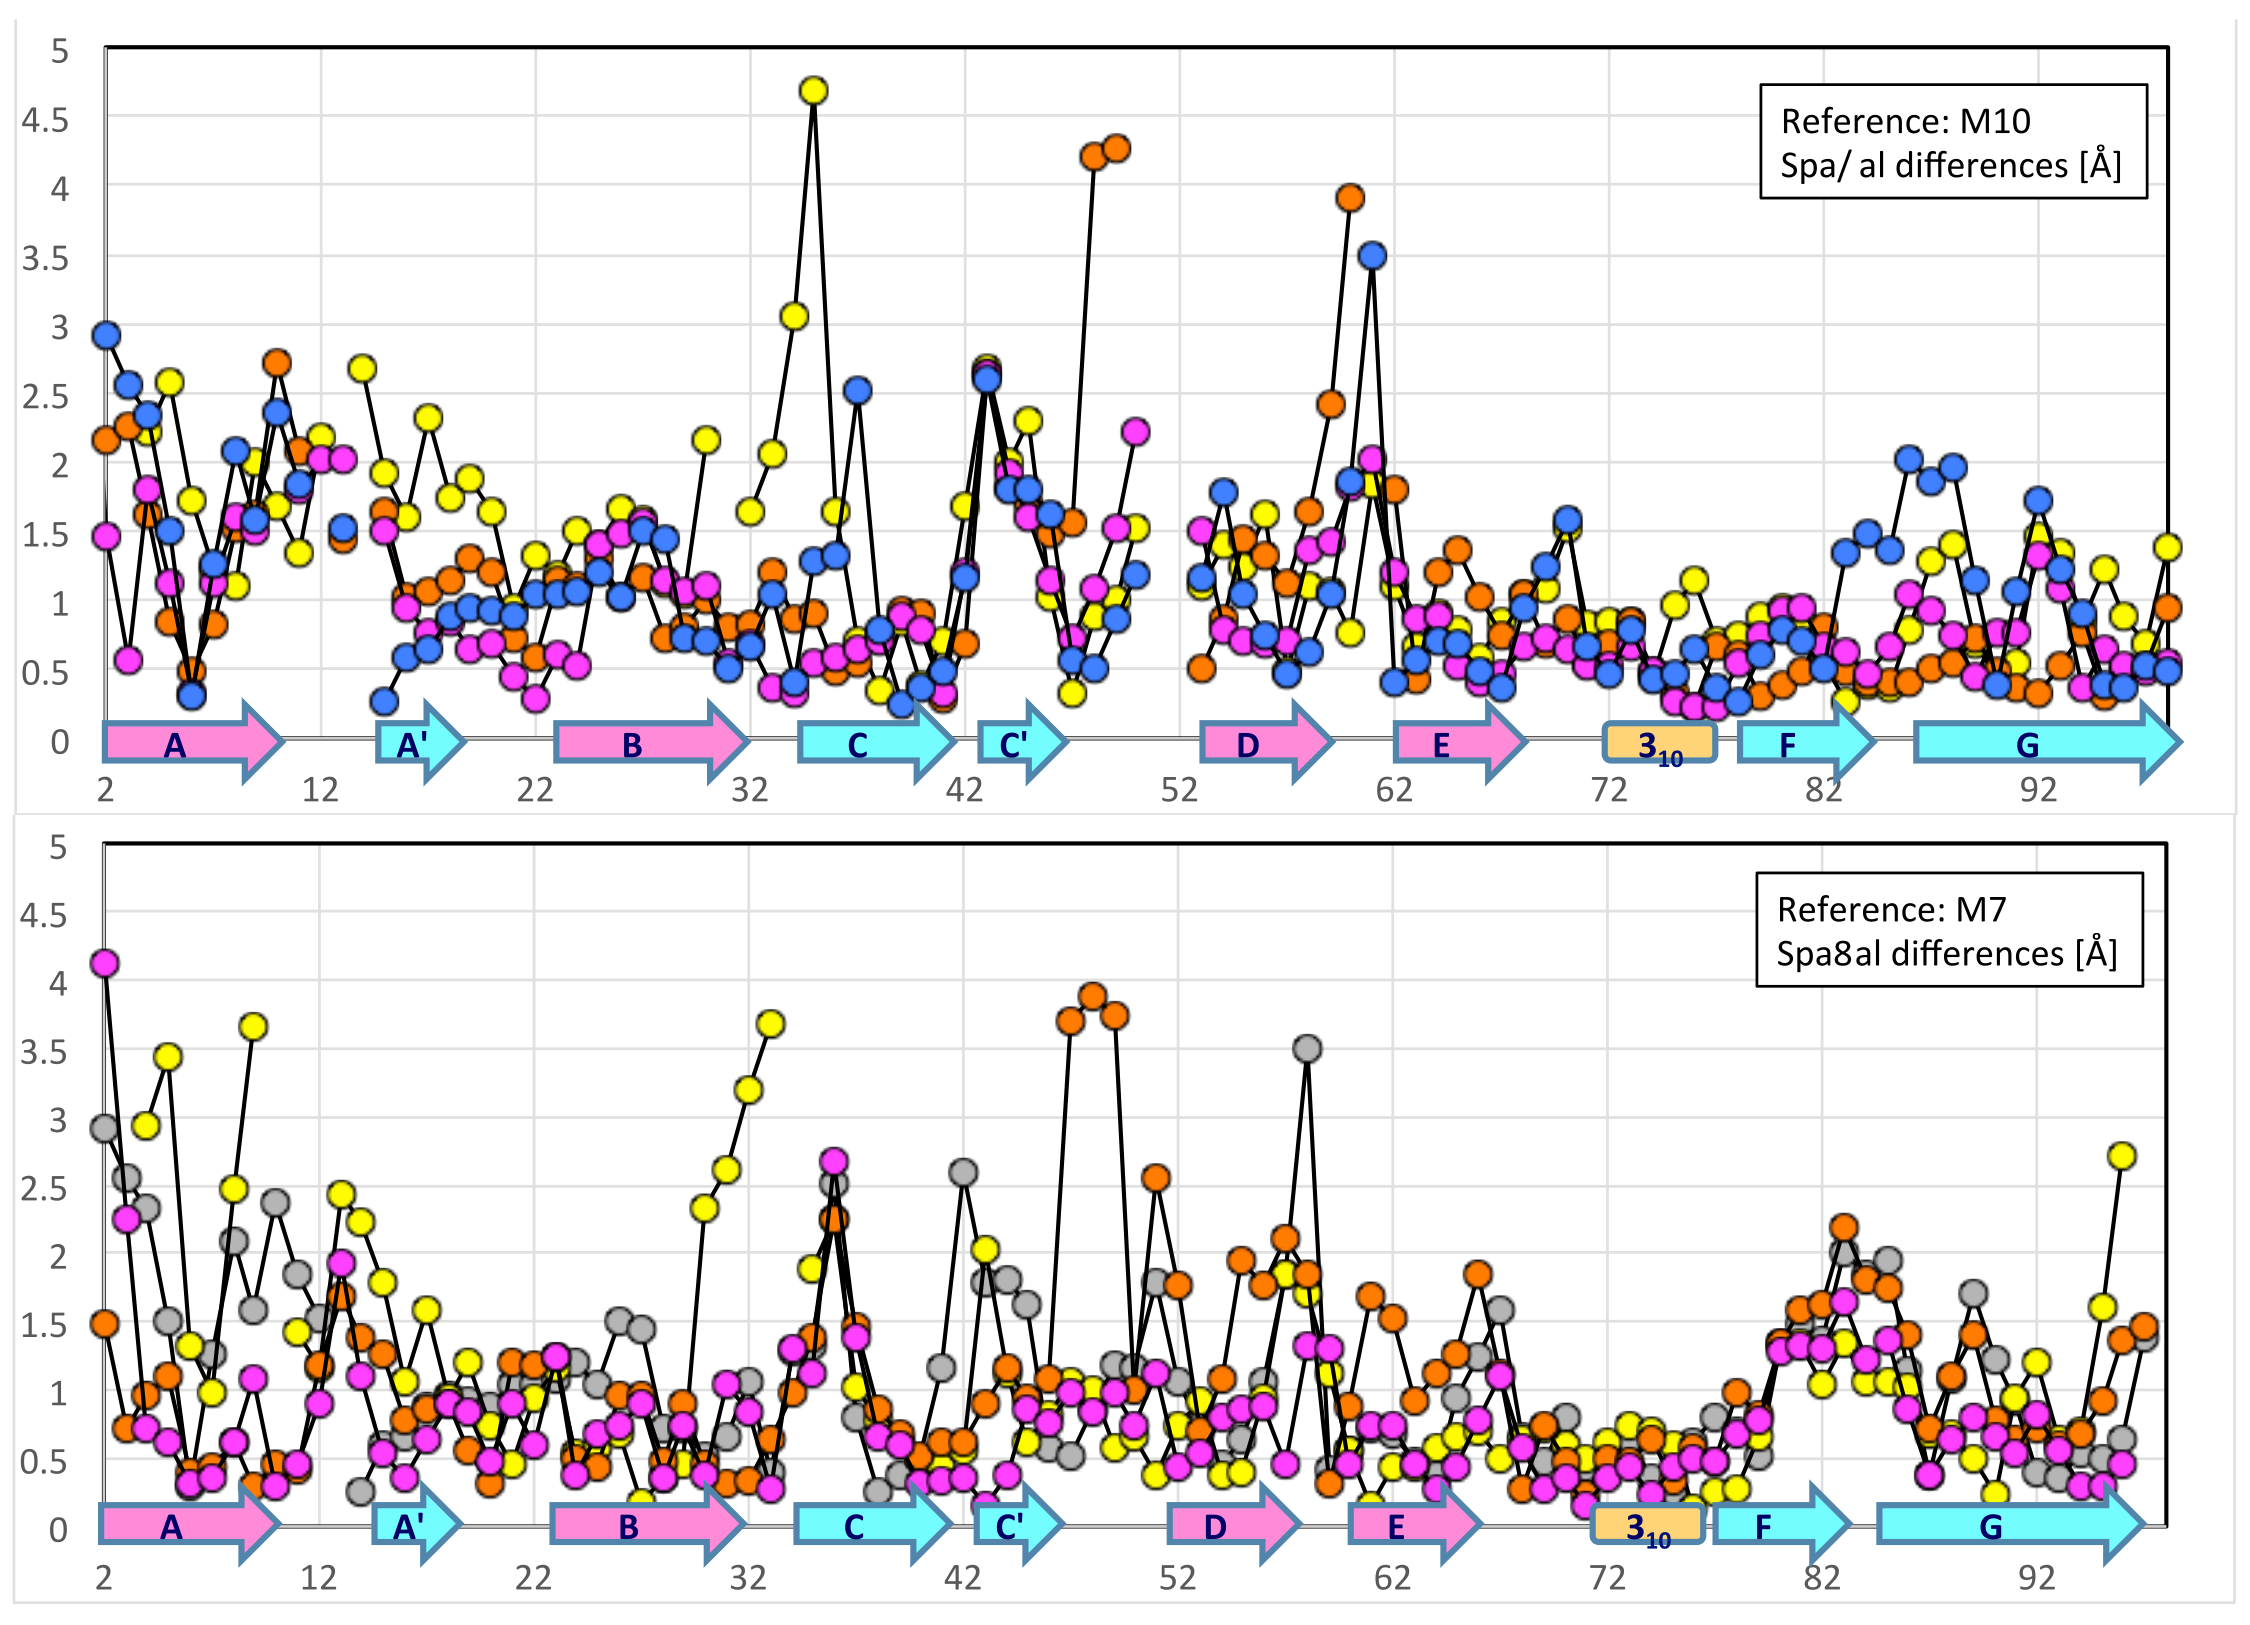

Supplement: Supplementary file 1 [file 1 › pone.0226693.s004.tif]

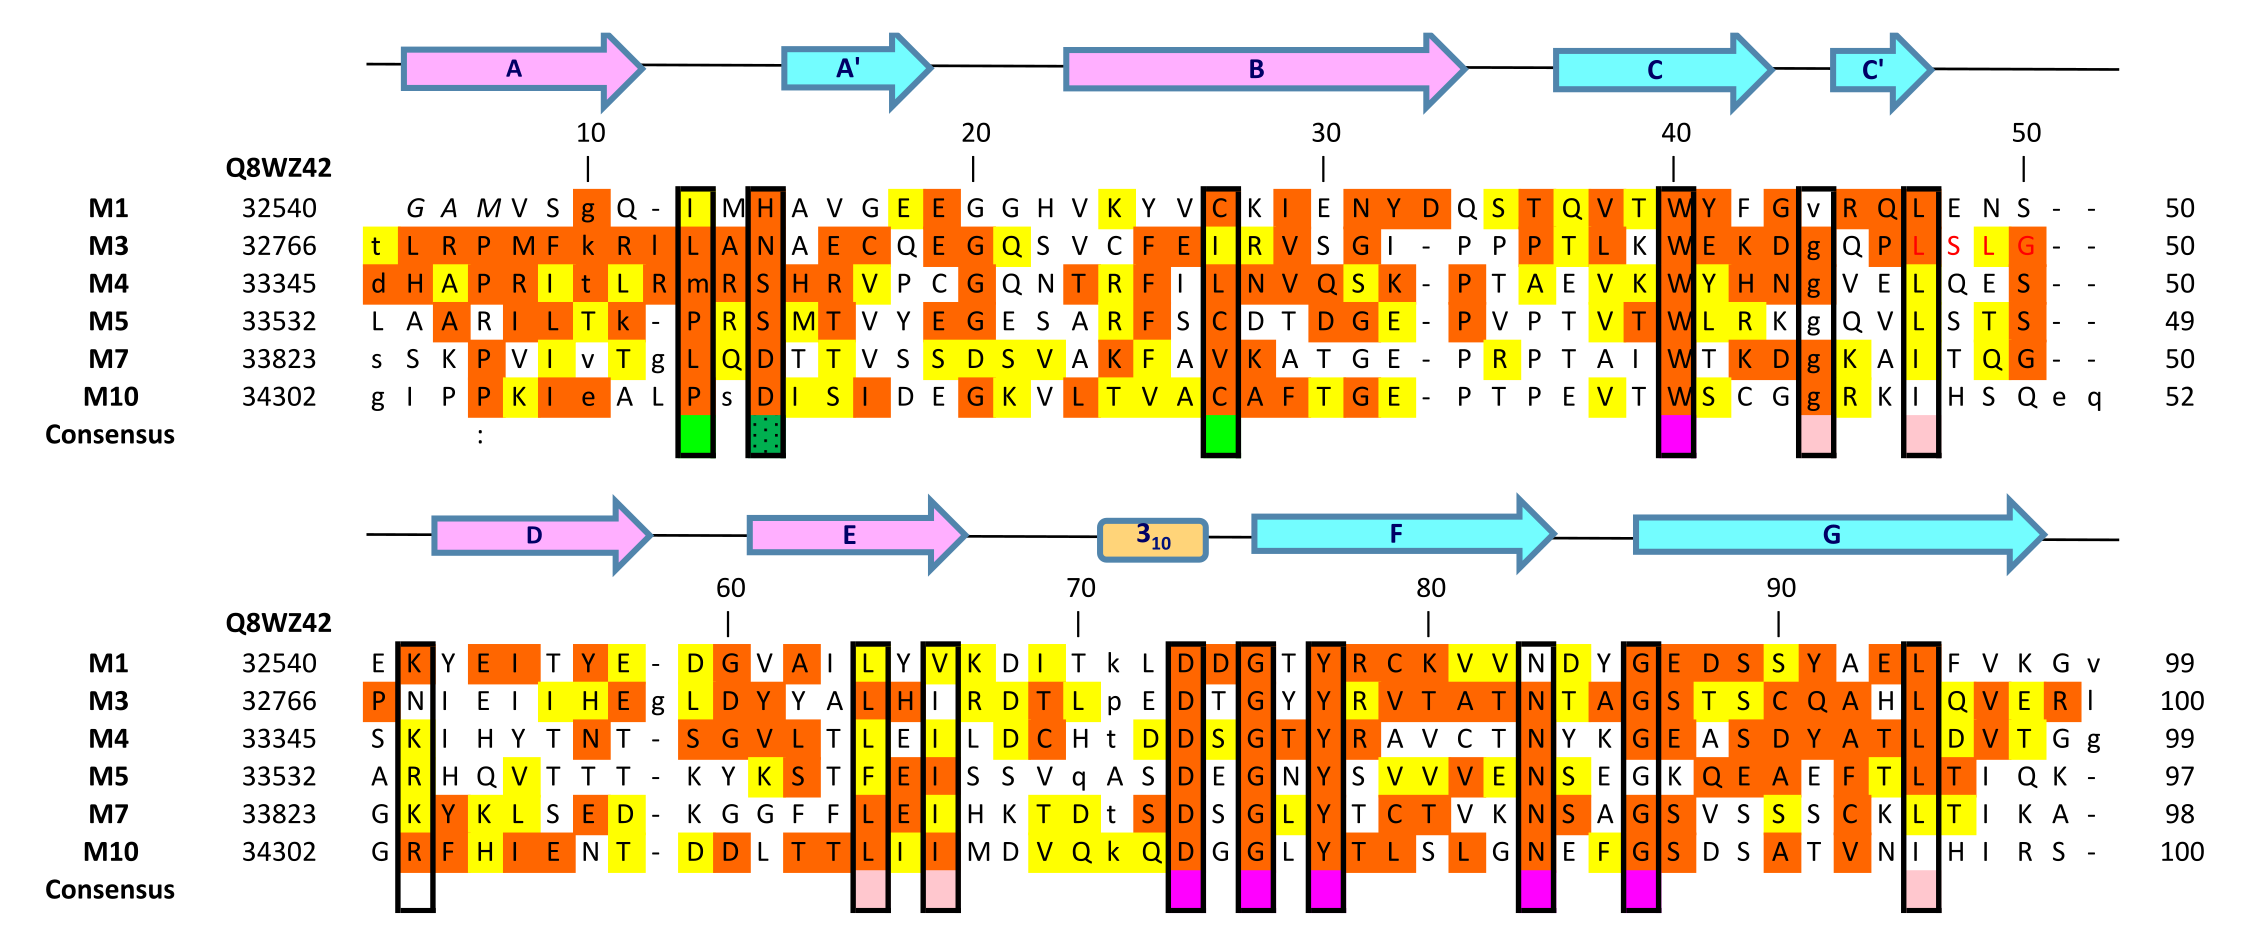

Supplement: Supplementary file 1 [file 1 › pone.0226693.s005.tif]

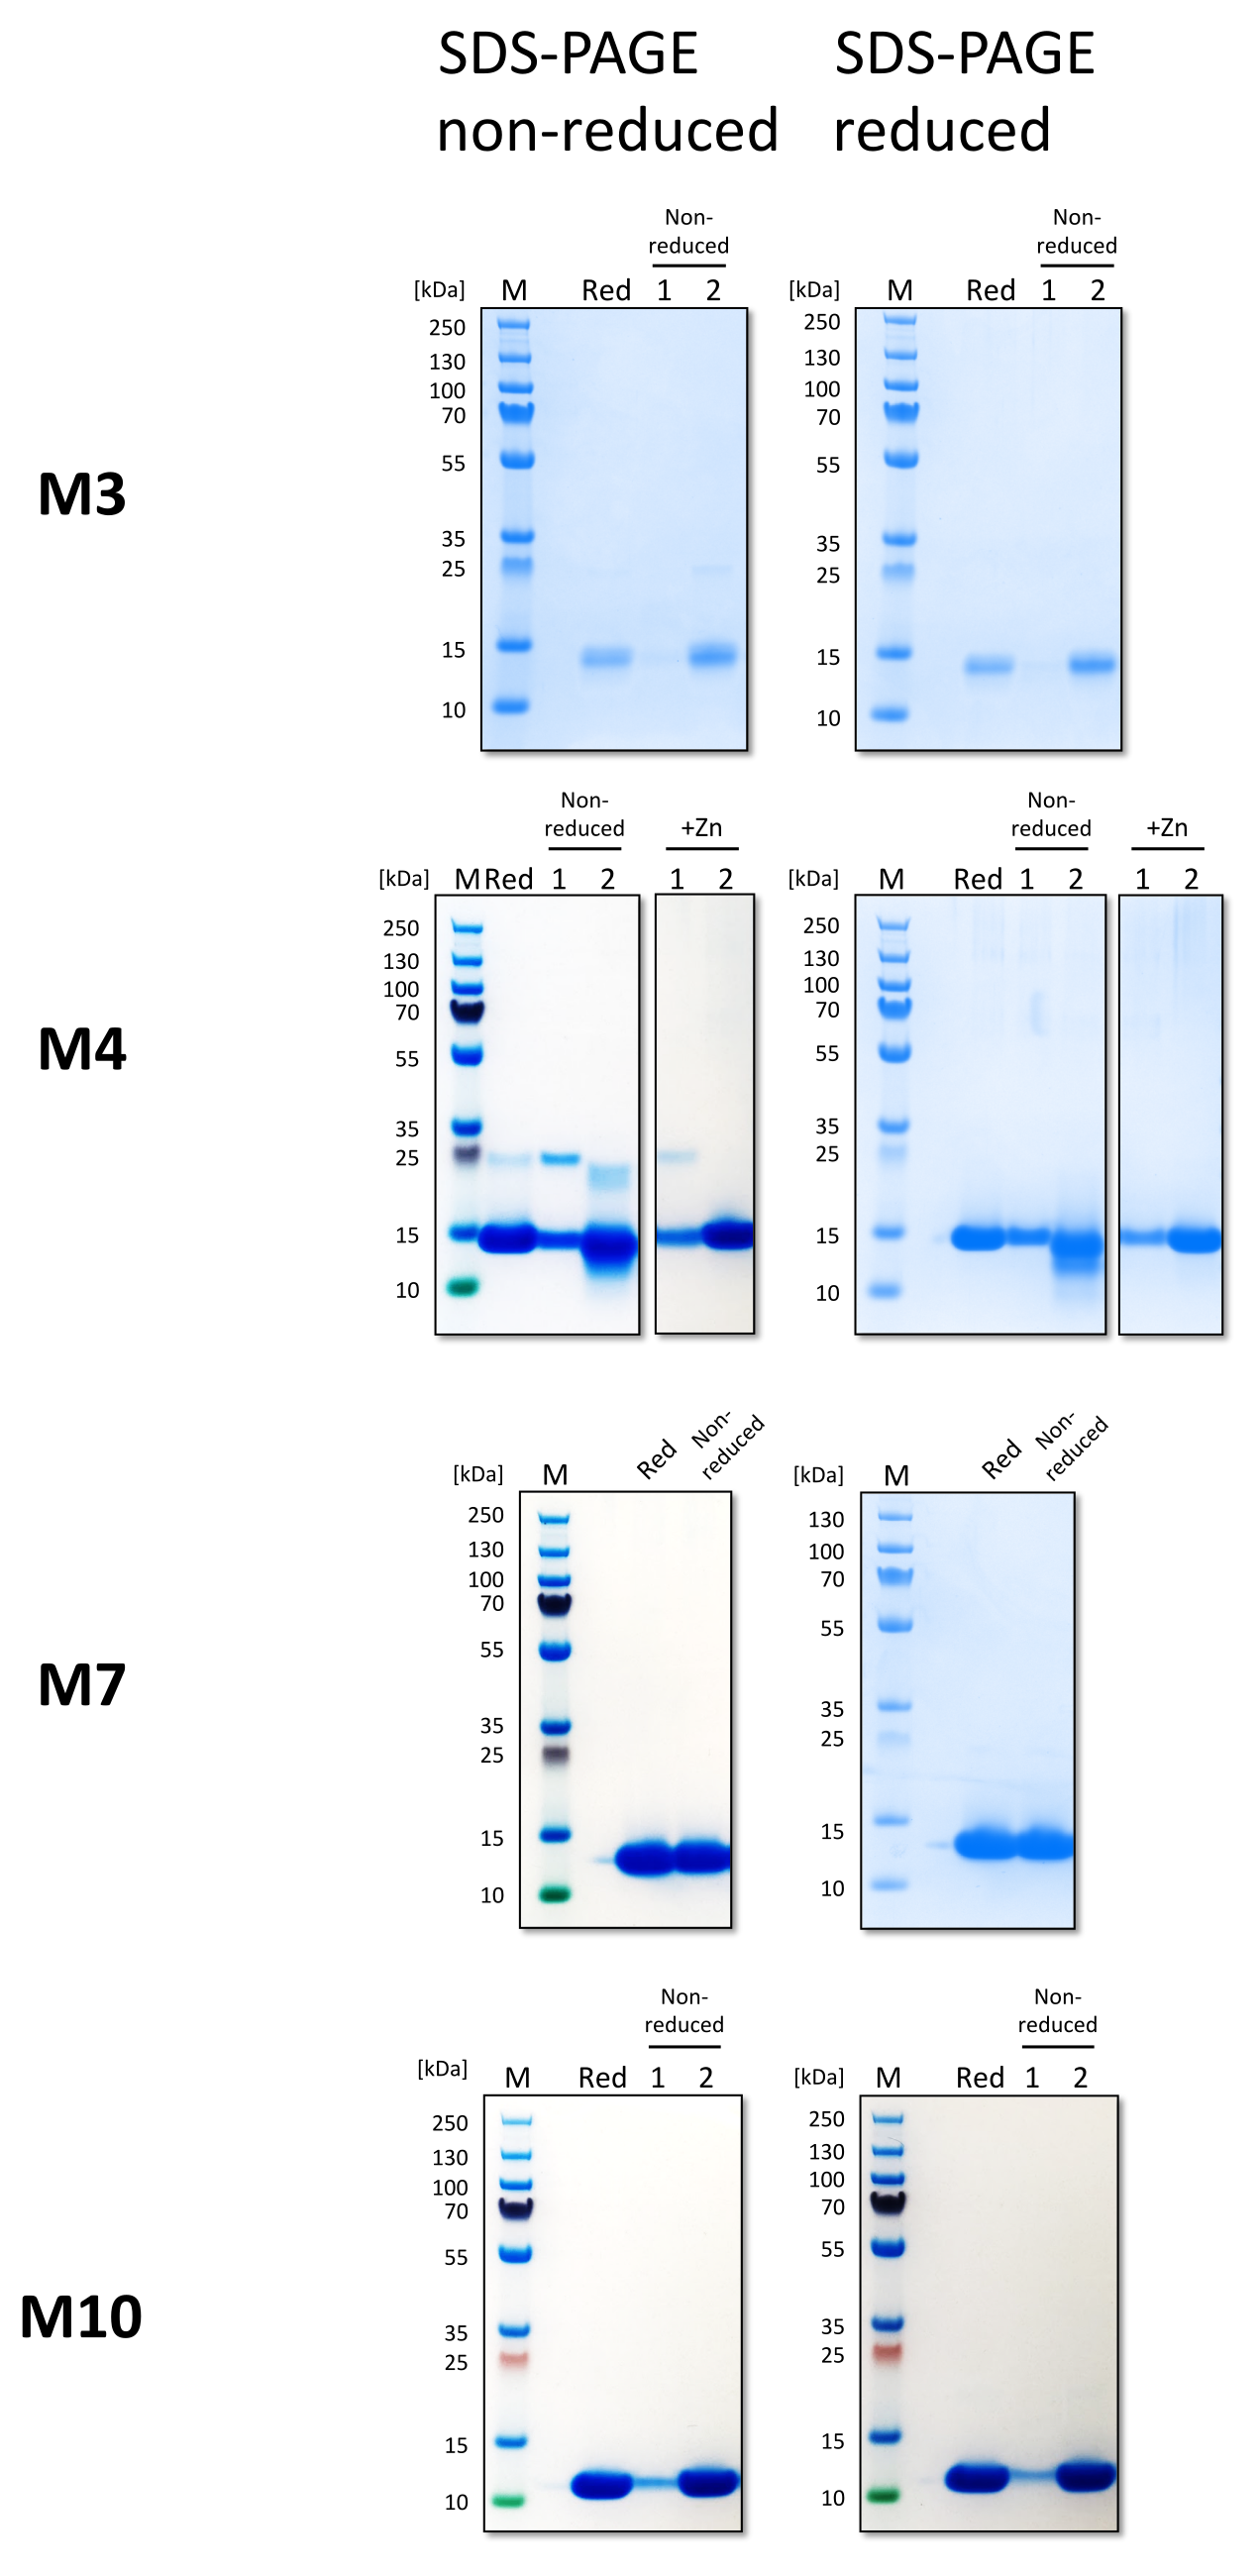

Supplement: Supplementary file 1 [file 1 › pone.0226693.s006.tif]
